# Supplementary material for: ARMCX Family Gene Expression Analysis and Potential Prognostic Biomarkers for Prediction of Clinical Outcome in Patients with Gastric Carcinoma
Source: Biomed Res Int. 2020 Jun 30;2020:3575038. doi: 10.1155/2020/3575038 (PMC7345962; doi:10.1155/2020/3575038)
Supplement: Supplementary 1 — Supplementary Table 1: GSEA KEGG (c2.all.v6.2.symbols.gmt) results of ARMCX1 and ARMCX2. [file 3575038.f1.xlsx]

## Sheet: Low expression of ARMCX1
NAME	GS<br> follow link to MSigDB	GS DETAILS	SIZE	ES	NES	NOM p-val	FDR q-val	FWER p-val	RANK AT MAX	LEADING EDGE
KOBAYASHI_EGFR_SIGNALING_24HR_DN	KOBAYASHI_EGFR_SIGNALING_24HR_DN	Details ...	242	0.752932	2.22584	0	0.0254695	0.026	2508	tags=72%, list=13%, signal=82%
SONG_TARGETS_OF_IE86_CMV_PROTEIN	SONG_TARGETS_OF_IE86_CMV_PROTEIN	Details ...	58	0.814889	2.20644	0	0.0195173	0.038	2217	tags=81%, list=12%, signal=92%
MANALO_HYPOXIA_DN	MANALO_HYPOXIA_DN	Details ...	271	0.743839	2.203	0	0.014028	0.04	3014	tags=77%, list=16%, signal=91%
DUTERTRE_ESTRADIOL_RESPONSE_24HR_UP	DUTERTRE_ESTRADIOL_RESPONSE_24HR_UP	Details ...	309	0.69829	2.182	0	0.0166639	0.053	2914	tags=70%, list=16%, signal=81%
MISSIAGLIA_REGULATED_BY_METHYLATION_DN	MISSIAGLIA_REGULATED_BY_METHYLATION_DN	Details ...	115	0.75856	2.17687	0	0.0152462	0.06	2618	tags=77%, list=14%, signal=88%
WELCSH_BRCA1_TARGETS_DN	WELCSH_BRCA1_TARGETS_DN	Details ...	139	0.677402	2.17629	0	0.0128136	0.061	4278	tags=76%, list=23%, signal=98%
GAVIN_FOXP3_TARGETS_CLUSTER_P6	GAVIN_FOXP3_TARGETS_CLUSTER_P6	Details ...	88	0.649338	2.13735	0.00206186	0.0217434	0.095	1819	tags=51%, list=10%, signal=56%
SHEDDEN_LUNG_CANCER_POOR_SURVIVAL_A6	SHEDDEN_LUNG_CANCER_POOR_SURVIVAL_A6	Details ...	427	0.662611	2.12917	0.0021645	0.0214097	0.105	3393	tags=63%, list=18%, signal=75%
ROSTY_CERVICAL_CANCER_PROLIFERATION_CLUSTER	ROSTY_CERVICAL_CANCER_PROLIFERATION_CLUSTER	Details ...	133	0.830669	2.12247	0	0.0209752	0.115	1819	tags=83%, list=10%, signal=92%
HOFFMANN_LARGE_TO_SMALL_PRE_BII_LYMPHOCYTE_UP	HOFFMANN_LARGE_TO_SMALL_PRE_BII_LYMPHOCYTE_UP	Details ...	158	0.681271	2.12178	0	0.0188777	0.115	3274	tags=68%, list=17%, signal=81%
RUIZ_TNC_TARGETS_DN	RUIZ_TNC_TARGETS_DN	Details ...	136	0.61092	2.12133	0.00210526	0.0173588	0.117	2199	tags=54%, list=12%, signal=60%
REACTOME_DNA_REPAIR	REACTOME_DNA_REPAIR	Details ...	101	0.649007	2.11808	0	0.016844	0.123	4641	tags=71%, list=25%, signal=94%
VECCHI_GASTRIC_CANCER_EARLY_UP	VECCHI_GASTRIC_CANCER_EARLY_UP	Details ...	384	0.652852	2.11497	0	0.0161226	0.126	4018	tags=66%, list=21%, signal=83%
REACTOME_METABOLISM_OF_VITAMINS_AND_COFACTORS	REACTOME_METABOLISM_OF_VITAMINS_AND_COFACTORS	Details ...	50	0.59648	2.11088	0	0.0161881	0.132	3736	tags=56%, list=20%, signal=70%
MUELLER_PLURINET	MUELLER_PLURINET	Details ...	296	0.646349	2.11074	0	0.0151089	0.132	3404	tags=65%, list=18%, signal=78%
LEE_EARLY_T_LYMPHOCYTE_UP	LEE_EARLY_T_LYMPHOCYTE_UP	Details ...	97	0.685293	2.10842	0.004158	0.0150963	0.143	1962	tags=60%, list=10%, signal=66%
KONG_E2F3_TARGETS	KONG_E2F3_TARGETS	Details ...	94	0.781177	2.10678	0.00209644	0.0146617	0.147	2049	tags=73%, list=11%, signal=82%
LY_AGING_PREMATURE_DN	LY_AGING_PREMATURE_DN	Details ...	29	0.78394	2.10241	0	0.0149481	0.156	2079	tags=69%, list=11%, signal=77%
KEGG_PYRIMIDINE_METABOLISM	KEGG_PYRIMIDINE_METABOLISM	Details ...	96	0.587706	2.09725	0	0.0157938	0.167	4203	tags=60%, list=22%, signal=78%
REACTOME_CELL_CYCLE_MITOTIC	REACTOME_CELL_CYCLE_MITOTIC	Details ...	300	0.638234	2.0966	0.00213675	0.0150987	0.168	4353	tags=67%, list=23%, signal=86%
PUJANA_BRCA2_PCC_NETWORK	PUJANA_BRCA2_PCC_NETWORK	Details ...	402	0.627184	2.0902	0.0021322	0.0160533	0.18	3245	tags=59%, list=17%, signal=69%
REACTOME_DNA_REPLICATION	REACTOME_DNA_REPLICATION	Details ...	181	0.706096	2.08919	0	0.0154872	0.181	3064	tags=71%, list=16%, signal=84%
REACTOME_CELL_CYCLE	REACTOME_CELL_CYCLE	Details ...	390	0.604143	2.08909	0	0.01487	0.182	4488	tags=62%, list=24%, signal=80%
LY_AGING_OLD_DN	LY_AGING_OLD_DN	Details ...	55	0.726987	2.08803	0	0.0145361	0.185	2397	tags=75%, list=13%, signal=85%
ODONNELL_TFRC_TARGETS_DN	ODONNELL_TFRC_TARGETS_DN	Details ...	125	0.631302	2.08718	0	0.0142017	0.186	2199	tags=50%, list=12%, signal=57%
WHITEFORD_PEDIATRIC_CANCER_MARKERS	WHITEFORD_PEDIATRIC_CANCER_MARKERS	Details ...	111	0.753887	2.0863	0	0.0137368	0.186	2473	tags=76%, list=13%, signal=87%
CHANG_CYCLING_GENES	CHANG_CYCLING_GENES	Details ...	138	0.73275	2.08618	0.0041841	0.0132281	0.186	2487	tags=74%, list=13%, signal=85%
ZHANG_TLX_TARGETS_60HR_DN	ZHANG_TLX_TARGETS_60HR_DN	Details ...	263	0.683444	2.08526	0.00210084	0.013047	0.192	3266	tags=72%, list=17%, signal=86%
FRASOR_RESPONSE_TO_SERM_OR_FULVESTRANT_DN	FRASOR_RESPONSE_TO_SERM_OR_FULVESTRANT_DN	Details ...	50	0.792826	2.07918	0.00208768	0.0142597	0.208	2754	tags=86%, list=15%, signal=101%
BURTON_ADIPOGENESIS_3	BURTON_ADIPOGENESIS_3	Details ...	100	0.710514	2.07909	0	0.0137844	0.208	1819	tags=69%, list=10%, signal=76%
FURUKAWA_DUSP6_TARGETS_PCI35_DN	FURUKAWA_DUSP6_TARGETS_PCI35_DN	Details ...	67	0.692109	2.07649	0.00218818	0.0138692	0.215	2473	tags=66%, list=13%, signal=75%
MORI_IMMATURE_B_LYMPHOCYTE_DN	MORI_IMMATURE_B_LYMPHOCYTE_DN	Details ...	90	0.739721	2.07632	0.00207469	0.0134607	0.215	2050	tags=70%, list=11%, signal=78%
SARRIO_EPITHELIAL_MESENCHYMAL_TRANSITION_UP	SARRIO_EPITHELIAL_MESENCHYMAL_TRANSITION_UP	Details ...	171	0.632224	2.0761	0.00420168	0.0131112	0.216	3140	tags=61%, list=17%, signal=72%
KAUFFMANN_DNA_REPAIR_GENES	KAUFFMANN_DNA_REPAIR_GENES	Details ...	220	0.596503	2.073	0.0021322	0.0133753	0.223	4528	tags=62%, list=24%, signal=81%
FISCHER_G2_M_CELL_CYCLE	FISCHER_G2_M_CELL_CYCLE	Details ...	220	0.626733	2.06947	0.00632911	0.0137172	0.23	2779	tags=54%, list=15%, signal=63%
WAMUNYOKOLI_OVARIAN_CANCER_LMP_UP	WAMUNYOKOLI_OVARIAN_CANCER_LMP_UP	Details ...	250	0.649155	2.06911	0	0.0134157	0.23	4733	tags=74%, list=25%, signal=97%
GRAHAM_NORMAL_QUIESCENT_VS_NORMAL_DIVIDING_DN	GRAHAM_NORMAL_QUIESCENT_VS_NORMAL_DIVIDING_DN	Details ...	85	0.749627	2.06856	0.00206612	0.0131801	0.23	1771	tags=69%, list=9%, signal=76%
MORI_LARGE_PRE_BII_LYMPHOCYTE_UP	MORI_LARGE_PRE_BII_LYMPHOCYTE_UP	Details ...	84	0.7407	2.06762	0	0.0129212	0.23	2624	tags=74%, list=14%, signal=85%
BLUM_RESPONSE_TO_SALIRASIB_DN	BLUM_RESPONSE_TO_SALIRASIB_DN	Details ...	335	0.585059	2.06699	0.00638298	0.0127056	0.231	2478	tags=53%, list=13%, signal=60%
REACTOME_PROCESSING_OF_CAPPED_INTRON_CONTAINING_PRE_MRNA	REACTOME_PROCESSING_OF_CAPPED_INTRON_CONTAINING_PRE_MRNA	Details ...	132	0.709518	2.06659	0	0.0124229	0.231	4127	tags=82%, list=22%, signal=104%
VERNELL_RETINOBLASTOMA_PATHWAY_UP	VERNELL_RETINOBLASTOMA_PATHWAY_UP	Details ...	68	0.709185	2.06203	0.00416667	0.0130764	0.238	2878	tags=72%, list=15%, signal=85%
WONG_EMBRYONIC_STEM_CELL_CORE	WONG_EMBRYONIC_STEM_CELL_CORE	Details ...	330	0.67844	2.06156	0	0.0129163	0.241	3100	tags=67%, list=17%, signal=79%
CROONQUIST_IL6_DEPRIVATION_DN	CROONQUIST_IL6_DEPRIVATION_DN	Details ...	96	0.771151	2.06039	0	0.0130867	0.25	1813	tags=74%, list=10%, signal=81%
KANG_DOXORUBICIN_RESISTANCE_UP	KANG_DOXORUBICIN_RESISTANCE_UP	Details ...	50	0.858823	2.05894	0	0.0130877	0.256	915	tags=82%, list=5%, signal=86%
REACTOME_MITOTIC_M_M_G1_PHASES	REACTOME_MITOTIC_M_M_G1_PHASES	Details ...	161	0.697312	2.05874	0	0.0128115	0.257	3735	tags=75%, list=20%, signal=93%
FLORIO_NEOCORTEX_BASAL_RADIAL_GLIA_DN	FLORIO_NEOCORTEX_BASAL_RADIAL_GLIA_DN	Details ...	187	0.637082	2.05836	0.00621118	0.0126156	0.258	2272	tags=66%, list=12%, signal=74%
FERREIRA_EWINGS_SARCOMA_UNSTABLE_VS_STABLE_UP	FERREIRA_EWINGS_SARCOMA_UNSTABLE_VS_STABLE_UP	Details ...	149	0.611338	2.05698	0.00417537	0.0125227	0.26	2732	tags=57%, list=15%, signal=66%
TOYOTA_TARGETS_OF_MIR34B_AND_MIR34C	TOYOTA_TARGETS_OF_MIR34B_AND_MIR34C	Details ...	409	0.558993	2.05661	0.00217865	0.0123328	0.261	4377	tags=59%, list=23%, signal=75%
REACTOME_LATE_PHASE_OF_HIV_LIFE_CYCLE	REACTOME_LATE_PHASE_OF_HIV_LIFE_CYCLE	Details ...	92	0.646283	2.05389	0	0.0125603	0.266	5575	tags=82%, list=30%, signal=116%
WU_APOPTOSIS_BY_CDKN1A_VIA_TP53	WU_APOPTOSIS_BY_CDKN1A_VIA_TP53	Details ...	54	0.741078	2.05351	0.00643777	0.0123835	0.267	1202	tags=65%, list=6%, signal=69%
SOTIRIOU_BREAST_CANCER_GRADE_1_VS_3_UP	SOTIRIOU_BREAST_CANCER_GRADE_1_VS_3_UP	Details ...	141	0.799868	2.05311	0	0.012186	0.268	3101	tags=91%, list=17%, signal=109%
NADERI_BREAST_CANCER_PROGNOSIS_UP	NADERI_BREAST_CANCER_PROGNOSIS_UP	Details ...	46	0.674256	2.05205	0	0.0120826	0.272	2305	tags=61%, list=12%, signal=69%
REN_BOUND_BY_E2F	REN_BOUND_BY_E2F	Details ...	61	0.768029	2.05154	0	0.0119103	0.273	3022	tags=79%, list=16%, signal=94%
PENG_GLUTAMINE_DEPRIVATION_DN	PENG_GLUTAMINE_DEPRIVATION_DN	Details ...	324	0.620673	2.04876	0	0.0120715	0.278	3479	tags=63%, list=19%, signal=76%
LE_EGR2_TARGETS_UP	LE_EGR2_TARGETS_UP	Details ...	104	0.622581	2.04813	0.00220264	0.0119765	0.279	1298	tags=52%, list=7%, signal=55%
REACTOME_RNA_POL_II_TRANSCRIPTION	REACTOME_RNA_POL_II_TRANSCRIPTION	Details ...	93	0.65289	2.0453	0	0.0122007	0.284	5575	tags=82%, list=30%, signal=116%
WANG_RESPONSE_TO_GSK3_INHIBITOR_SB216763_DN	WANG_RESPONSE_TO_GSK3_INHIBITOR_SB216763_DN	Details ...	332	0.554673	2.04301	0.00218341	0.0124401	0.292	3022	tags=51%, list=16%, signal=60%
BIDUS_METASTASIS_UP	BIDUS_METASTASIS_UP	Details ...	204	0.634937	2.03981	0.00426439	0.0127627	0.299	3864	tags=61%, list=21%, signal=76%
REACTOME_MRNA_SPLICING	REACTOME_MRNA_SPLICING	Details ...	104	0.711226	2.03794	0	0.0129297	0.305	4082	tags=82%, list=22%, signal=104%
SCHLOSSER_MYC_TARGETS_REPRESSED_BY_SERUM	SCHLOSSER_MYC_TARGETS_REPRESSED_BY_SERUM	Details ...	153	0.671759	2.03449	0	0.0136206	0.323	4880	tags=79%, list=26%, signal=106%
CROONQUIST_NRAS_SIGNALING_DN	CROONQUIST_NRAS_SIGNALING_DN	Details ...	71	0.778706	2.03336	0.00212314	0.013529	0.323	2473	tags=82%, list=13%, signal=94%
REACTOME_HIV_LIFE_CYCLE	REACTOME_HIV_LIFE_CYCLE	Details ...	105	0.62066	2.03329	0	0.0133208	0.323	5575	tags=78%, list=30%, signal=111%
MARKEY_RB1_ACUTE_LOF_UP	MARKEY_RB1_ACUTE_LOF_UP	Details ...	223	0.588543	2.03276	0.00823045	0.0132223	0.326	3141	tags=59%, list=17%, signal=70%
BOYAULT_LIVER_CANCER_SUBCLASS_G23_UP	BOYAULT_LIVER_CANCER_SUBCLASS_G23_UP	Details ...	49	0.700935	2.03095	0	0.0134079	0.337	2624	tags=59%, list=14%, signal=69%
KAUFFMANN_DNA_REPLICATION_GENES	KAUFFMANN_DNA_REPLICATION_GENES	Details ...	141	0.581315	2.03077	0.00421053	0.0132209	0.338	3162	tags=55%, list=17%, signal=65%
GRAHAM_CML_DIVIDING_VS_NORMAL_QUIESCENT_UP	GRAHAM_CML_DIVIDING_VS_NORMAL_QUIESCENT_UP	Details ...	176	0.627956	2.02974	0.00635593	0.0132563	0.345	2693	tags=63%, list=14%, signal=73%
VILLANUEVA_LIVER_CANCER_KRT19_UP	VILLANUEVA_LIVER_CANCER_KRT19_UP	Details ...	162	0.602353	2.02743	0.00215983	0.0135348	0.355	3051	tags=49%, list=16%, signal=58%
REACTOME_MITOTIC_G1_G1_S_PHASES	REACTOME_MITOTIC_G1_G1_S_PHASES	Details ...	130	0.683392	2.0265	0.0021322	0.0134618	0.355	4353	tags=75%, list=23%, signal=97%
LINDGREN_BLADDER_CANCER_CLUSTER_3_UP	LINDGREN_BLADDER_CANCER_CLUSTER_3_UP	Details ...	305	0.575693	2.02627	0.00428265	0.0132864	0.355	4571	tags=60%, list=24%, signal=78%
REACTOME_MRNA_PROCESSING	REACTOME_MRNA_PROCESSING	Details ...	151	0.6707	2.02526	0	0.0133022	0.358	4127	tags=75%, list=22%, signal=96%
COLLER_MYC_TARGETS_UP	COLLER_MYC_TARGETS_UP	Details ...	25	0.784624	2.02323	0	0.0135186	0.362	3100	tags=76%, list=17%, signal=91%
PUJANA_BRCA_CENTERED_NETWORK	PUJANA_BRCA_CENTERED_NETWORK	Details ...	114	0.706263	2.01904	0.0021097	0.014093	0.367	3188	tags=75%, list=17%, signal=89%
WANG_METASTASIS_OF_BREAST_CANCER_ESR1_UP	WANG_METASTASIS_OF_BREAST_CANCER_ESR1_UP	Details ...	19	0.81811	2.01688	0	0.0143933	0.371	2397	tags=84%, list=13%, signal=96%
LI_WILMS_TUMOR_VS_FETAL_KIDNEY_1_DN	LI_WILMS_TUMOR_VS_FETAL_KIDNEY_1_DN	Details ...	159	0.610036	2.01387	0.00209205	0.0148476	0.376	2255	tags=55%, list=12%, signal=62%
REACTOME_MITOTIC_PROMETAPHASE	REACTOME_MITOTIC_PROMETAPHASE	Details ...	79	0.681428	2.0131	0.00623701	0.0148627	0.38	2376	tags=61%, list=13%, signal=69%
ODONNELL_TARGETS_OF_MYC_AND_TFRC_DN	ODONNELL_TARGETS_OF_MYC_AND_TFRC_DN	Details ...	43	0.750649	2.01264	0	0.014721	0.38	2473	tags=72%, list=13%, signal=83%
FOURNIER_ACINAR_DEVELOPMENT_LATE_2	FOURNIER_ACINAR_DEVELOPMENT_LATE_2	Details ...	265	0.613222	2.01252	0.00873363	0.0145457	0.38	3506	tags=64%, list=19%, signal=78%
SCHUHMACHER_MYC_TARGETS_UP	SCHUHMACHER_MYC_TARGETS_UP	Details ...	77	0.704068	2.00897	0	0.0151444	0.392	3347	tags=71%, list=18%, signal=87%
THILLAINADESAN_ZNF217_TARGETS_UP	THILLAINADESAN_ZNF217_TARGETS_UP	Details ...	42	0.638245	2.00761	0	0.0151243	0.393	4225	tags=69%, list=23%, signal=89%
CHIANG_LIVER_CANCER_SUBCLASS_PROLIFERATION_UP	CHIANG_LIVER_CANCER_SUBCLASS_PROLIFERATION_UP	Details ...	164	0.593796	2.00674	0.0107759	0.0150624	0.395	2609	tags=51%, list=14%, signal=58%
BASSO_B_LYMPHOCYTE_NETWORK	BASSO_B_LYMPHOCYTE_NETWORK	Details ...	135	0.519404	2.00668	0.00204082	0.0148925	0.395	2876	tags=48%, list=15%, signal=56%
REACTOME_SYNTHESIS_OF_DNA	REACTOME_SYNTHESIS_OF_DNA	Details ...	90	0.724994	2.0056	0	0.0149865	0.397	3064	tags=76%, list=16%, signal=90%
KEGG_NUCLEOTIDE_EXCISION_REPAIR	KEGG_NUCLEOTIDE_EXCISION_REPAIR	Details ...	44	0.667659	2.0053	0	0.0149231	0.398	3170	tags=57%, list=17%, signal=68%
WHITFIELD_CELL_CYCLE_LITERATURE	WHITFIELD_CELL_CYCLE_LITERATURE	Details ...	44	0.817689	2.00483	0	0.0148398	0.4	2473	tags=80%, list=13%, signal=91%
TARTE_PLASMA_CELL_VS_PLASMABLAST_DN	TARTE_PLASMA_CELL_VS_PLASMABLAST_DN	Details ...	300	0.601792	2.00478	0.00431035	0.0146812	0.4	3521	tags=61%, list=19%, signal=74%
GRADE_COLON_AND_RECTAL_CANCER_UP	GRADE_COLON_AND_RECTAL_CANCER_UP	Details ...	272	0.614326	2.00363	0.00431965	0.0147685	0.404	4906	tags=72%, list=26%, signal=96%
PUJANA_XPRSS_INT_NETWORK	PUJANA_XPRSS_INT_NETWORK	Details ...	161	0.682109	2.00094	0.00423729	0.0151561	0.412	4136	tags=78%, list=22%, signal=99%
MITSIADES_RESPONSE_TO_APLIDIN_DN	MITSIADES_RESPONSE_TO_APLIDIN_DN	Details ...	239	0.604312	1.99822	0.00632911	0.0155847	0.421	4363	tags=64%, list=23%, signal=82%
REACTOME_CELL_CYCLE_CHECKPOINTS	REACTOME_CELL_CYCLE_CHECKPOINTS	Details ...	111	0.682337	1.99737	0	0.0155889	0.422	3150	tags=68%, list=17%, signal=81%
LIM_MAMMARY_STEM_CELL_DN	LIM_MAMMARY_STEM_CELL_DN	Details ...	407	0.502026	1.9956	0.00208768	0.0157315	0.43	5165	tags=53%, list=28%, signal=72%
ZHANG_TLX_TARGETS_DN	ZHANG_TLX_TARGETS_DN	Details ...	87	0.767994	1.99507	0.00211416	0.0156871	0.433	3022	tags=83%, list=16%, signal=98%
KEGG_SPLICEOSOME	KEGG_SPLICEOSOME	Details ...	123	0.653534	1.99436	0	0.0156006	0.433	5287	tags=80%, list=28%, signal=111%
KEGG_CELL_CYCLE	KEGG_CELL_CYCLE	Details ...	124	0.588799	1.99407	0.00416667	0.0154875	0.434	3170	tags=52%, list=17%, signal=63%
ZHOU_CELL_CYCLE_GENES_IN_IR_RESPONSE_24HR	ZHOU_CELL_CYCLE_GENES_IN_IR_RESPONSE_24HR	Details ...	119	0.699208	1.99213	0.00835073	0.0155726	0.435	2216	tags=74%, list=12%, signal=83%
WINNEPENNINCKX_MELANOMA_METASTASIS_UP	WINNEPENNINCKX_MELANOMA_METASTASIS_UP	Details ...	151	0.671439	1.99184	0.0108225	0.015487	0.436	2610	tags=68%, list=14%, signal=79%
KEGG_BASE_EXCISION_REPAIR	KEGG_BASE_EXCISION_REPAIR	Details ...	33	0.712292	1.99129	0	0.0154687	0.438	4208	tags=79%, list=22%, signal=101%
WEST_ADRENOCORTICAL_TUMOR_UP	WEST_ADRENOCORTICAL_TUMOR_UP	Details ...	282	0.559214	1.99011	0.00215983	0.0156105	0.439	4525	tags=62%, list=24%, signal=81%
NOUZOVA_TRETINOIN_AND_H4_ACETYLATION	NOUZOVA_TRETINOIN_AND_H4_ACETYLATION	Details ...	130	0.51723	1.98792	0	0.0159812	0.449	5486	tags=55%, list=29%, signal=78%
BOYAULT_LIVER_CANCER_SUBCLASS_G3_UP	BOYAULT_LIVER_CANCER_SUBCLASS_G3_UP	Details ...	181	0.628963	1.9878	0.0043956	0.0158543	0.449	4786	tags=72%, list=26%, signal=96%
REACTOME_TRANSCRIPTION	REACTOME_TRANSCRIPTION	Details ...	191	0.587208	1.98621	0	0.015985	0.453	5884	tags=72%, list=31%, signal=104%
SANSOM_APC_TARGETS_REQUIRE_MYC	SANSOM_APC_TARGETS_REQUIRE_MYC	Details ...	192	0.530088	1.98261	0.00204082	0.0166674	0.463	4259	tags=50%, list=23%, signal=64%
KAUFFMANN_MELANOMA_RELAPSE_UP	KAUFFMANN_MELANOMA_RELAPSE_UP	Details ...	59	0.769755	1.98247	0	0.0165228	0.463	2373	tags=76%, list=13%, signal=87%
REACTOME_EXTENSION_OF_TELOMERES	REACTOME_EXTENSION_OF_TELOMERES	Details ...	27	0.81224	1.97996	0	0.016905	0.467	3022	tags=89%, list=16%, signal=106%
FERRANDO_T_ALL_WITH_MLL_ENL_FUSION_DN	FERRANDO_T_ALL_WITH_MLL_ENL_FUSION_DN	Details ...	83	0.608621	1.97975	0.00416667	0.0167898	0.468	4241	tags=65%, list=23%, signal=84%
KEGG_RNA_DEGRADATION	KEGG_RNA_DEGRADATION	Details ...	56	0.631025	1.97939	0.00430108	0.0167502	0.472	3607	tags=59%, list=19%, signal=73%
REACTOME_S_PHASE	REACTOME_S_PHASE	Details ...	106	0.696454	1.9772	0.00211864	0.0169858	0.478	3697	tags=75%, list=20%, signal=92%
PENG_RAPAMYCIN_RESPONSE_DN	PENG_RAPAMYCIN_RESPONSE_DN	Details ...	230	0.619984	1.97526	0	0.0171412	0.481	4802	tags=74%, list=26%, signal=98%
REACTOME_GLOBAL_GENOMIC_NER_GG_NER	REACTOME_GLOBAL_GENOMIC_NER_GG_NER	Details ...	32	0.695599	1.97428	0	0.0172407	0.485	3170	tags=66%, list=17%, signal=79%
CHANG_CORE_SERUM_RESPONSE_UP	CHANG_CORE_SERUM_RESPONSE_UP	Details ...	198	0.583455	1.97175	0.00428265	0.0175558	0.492	3202	tags=59%, list=17%, signal=70%
SANSOM_APC_MYC_TARGETS	SANSOM_APC_MYC_TARGETS	Details ...	198	0.496617	1.96946	0	0.0179724	0.496	5283	tags=54%, list=28%, signal=75%
LAU_APOPTOSIS_CDKN2A_UP	LAU_APOPTOSIS_CDKN2A_UP	Details ...	55	0.559374	1.96909	0	0.0179183	0.497	2940	tags=51%, list=16%, signal=60%
REACTOME_G1_S_TRANSITION	REACTOME_G1_S_TRANSITION	Details ...	106	0.696033	1.96723	0.00211864	0.0181024	0.503	3735	tags=75%, list=20%, signal=93%
ZHOU_CELL_CYCLE_GENES_IN_IR_RESPONSE_6HR	ZHOU_CELL_CYCLE_GENES_IN_IR_RESPONSE_6HR	Details ...	80	0.744443	1.96386	0.00417537	0.0187295	0.506	2996	tags=83%, list=16%, signal=98%
KEGG_DNA_REPLICATION	KEGG_DNA_REPLICATION	Details ...	36	0.787528	1.96192	0	0.019011	0.509	3022	tags=81%, list=16%, signal=96%
REACTOME_M_G1_TRANSITION	REACTOME_M_G1_TRANSITION	Details ...	78	0.722716	1.96188	0	0.0188517	0.509	4098	tags=85%, list=22%, signal=108%
REACTOME_TRANSPORT_OF_MATURE_TRANSCRIPT_TO_CYTOPLASM	REACTOME_TRANSPORT_OF_MATURE_TRANSCRIPT_TO_CYTOPLASM	Details ...	51	0.706952	1.96187	0.00438597	0.0186951	0.509	3480	tags=76%, list=19%, signal=94%
BASAKI_YBX1_TARGETS_UP	BASAKI_YBX1_TARGETS_UP	Details ...	268	0.535349	1.96102	0.0147992	0.0187935	0.515	2906	tags=53%, list=16%, signal=62%
BURTON_ADIPOGENESIS_PEAK_AT_24HR	BURTON_ADIPOGENESIS_PEAK_AT_24HR	Details ...	42	0.746609	1.96098	0.00630252	0.0186464	0.515	2245	tags=67%, list=12%, signal=76%
REACTOME_G2_M_CHECKPOINTS	REACTOME_G2_M_CHECKPOINTS	Details ...	41	0.755213	1.96076	0.002079	0.0185368	0.516	1762	tags=68%, list=9%, signal=75%
GREENBAUM_E2A_TARGETS_UP	GREENBAUM_E2A_TARGETS_UP	Details ...	32	0.748563	1.96014	0.00649351	0.018509	0.518	2693	tags=72%, list=14%, signal=84%
REACTOME_CLEAVAGE_OF_GROWING_TRANSCRIPT_IN_THE_TERMINATION_REGION_	REACTOME_CLEAVAGE_OF_GROWING_TRANSCRIPT_IN_THE_TERMINATION_REGION_	Details ...	42	0.708895	1.95922	0.00215517	0.0186804	0.524	4659	tags=83%, list=25%, signal=111%
REACTOME_DEADENYLATION_DEPENDENT_MRNA_DECAY	REACTOME_DEADENYLATION_DEPENDENT_MRNA_DECAY	Details ...	42	0.645839	1.95865	0.00214592	0.0186376	0.524	3607	tags=62%, list=19%, signal=77%
REACTOME_METABOLISM_OF_NON_CODING_RNA	REACTOME_METABOLISM_OF_NON_CODING_RNA	Details ...	47	0.700777	1.95621	0.00214592	0.0191004	0.533	4997	tags=89%, list=27%, signal=122%
BONOME_OVARIAN_CANCER_POOR_SURVIVAL_DN	BONOME_OVARIAN_CANCER_POOR_SURVIVAL_DN	Details ...	20	0.706146	1.95541	0	0.0191099	0.536	2606	tags=60%, list=14%, signal=70%
HORIUCHI_WTAP_TARGETS_DN	HORIUCHI_WTAP_TARGETS_DN	Details ...	293	0.562936	1.95477	0.00656455	0.0191666	0.538	2773	tags=53%, list=15%, signal=62%
FUJII_YBX1_TARGETS_DN	FUJII_YBX1_TARGETS_DN	Details ...	193	0.592589	1.95361	0.00863931	0.0192535	0.544	3014	tags=58%, list=16%, signal=68%
MOOTHA_MITOCHONDRIA	MOOTHA_MITOCHONDRIA	Details ...	431	0.5664	1.95256	0	0.0193736	0.549	5419	tags=66%, list=29%, signal=90%
REACTOME_RNA_POL_II_PRE_TRANSCRIPTION_EVENTS	REACTOME_RNA_POL_II_PRE_TRANSCRIPTION_EVENTS	Details ...	51	0.633391	1.9519	0	0.0193758	0.551	5575	tags=80%, list=30%, signal=114%
REACTOME_MRNA_SPLICING_MINOR_PATHWAY	REACTOME_MRNA_SPLICING_MINOR_PATHWAY	Details ...	40	0.715596	1.94821	0	0.0199813	0.565	4308	tags=88%, list=23%, signal=113%
REACTOME_DNA_STRAND_ELONGATION	REACTOME_DNA_STRAND_ELONGATION	Details ...	30	0.827198	1.94761	0	0.0199583	0.567	1363	tags=80%, list=7%, signal=86%
REACTOME_ORC1_REMOVAL_FROM_CHROMATIN	REACTOME_ORC1_REMOVAL_FROM_CHROMATIN	Details ...	65	0.702975	1.94735	0.00209644	0.0198933	0.567	4098	tags=80%, list=22%, signal=102%
AMUNDSON_GAMMA_RADIATION_RESPONSE	AMUNDSON_GAMMA_RADIATION_RESPONSE	Details ...	40	0.786461	1.94543	0.00215054	0.0202067	0.575	2541	tags=80%, list=14%, signal=92%
PENG_LEUCINE_DEPRIVATION_DN	PENG_LEUCINE_DEPRIVATION_DN	Details ...	182	0.626568	1.94526	0	0.0201331	0.576	4274	tags=71%, list=23%, signal=91%
SUNG_METASTASIS_STROMA_DN	SUNG_METASTASIS_STROMA_DN	Details ...	50	0.596217	1.94443	0.00208333	0.020138	0.578	2373	tags=48%, list=13%, signal=55%
KAMMINGA_EZH2_TARGETS	KAMMINGA_EZH2_TARGETS	Details ...	41	0.785862	1.94422	0.00214133	0.0200493	0.579	2855	tags=85%, list=15%, signal=101%
PUJANA_BREAST_CANCER_WITH_BRCA1_MUTATED_UP	PUJANA_BREAST_CANCER_WITH_BRCA1_MUTATED_UP	Details ...	54	0.764457	1.94396	0.00212314	0.0199416	0.58	3447	tags=87%, list=18%, signal=106%
REACTOME_ACTIVATION_OF_ATR_IN_RESPONSE_TO_REPLICATION_STRESS	REACTOME_ACTIVATION_OF_ATR_IN_RESPONSE_TO_REPLICATION_STRESS	Details ...	35	0.762849	1.94348	0	0.0198653	0.582	2900	tags=77%, list=16%, signal=91%
GARGALOVIC_RESPONSE_TO_OXIDIZED_PHOSPHOLIPIDS_TURQUOISE_DN	GARGALOVIC_RESPONSE_TO_OXIDIZED_PHOSPHOLIPIDS_TURQUOISE_DN	Details ...	50	0.633462	1.94135	0.00414938	0.0202515	0.589	2724	tags=62%, list=15%, signal=72%
HU_GENOTOXIC_DAMAGE_4HR	HU_GENOTOXIC_DAMAGE_4HR	Details ...	35	0.677224	1.93933	0.00422833	0.020643	0.595	2613	tags=60%, list=14%, signal=70%
MOOTHA_HUMAN_MITODB_6_2002	MOOTHA_HUMAN_MITODB_6_2002	Details ...	417	0.565174	1.93932	0.00204918	0.0204956	0.595	5406	tags=67%, list=29%, signal=92%
GINESTIER_BREAST_CANCER_20Q13_AMPLIFICATION_DN	GINESTIER_BREAST_CANCER_20Q13_AMPLIFICATION_DN	Details ...	151	0.559222	1.93799	0.00436681	0.0207094	0.598	4152	tags=56%, list=22%, signal=72%
REACTOME_ACTIVATION_OF_THE_PRE_REPLICATIVE_COMPLEX	REACTOME_ACTIVATION_OF_THE_PRE_REPLICATIVE_COMPLEX	Details ...	30	0.809191	1.93755	0	0.020674	0.6	3022	tags=87%, list=16%, signal=103%
ZHANG_RESPONSE_TO_CANTHARIDIN_DN	ZHANG_RESPONSE_TO_CANTHARIDIN_DN	Details ...	67	0.671838	1.93668	0.00206612	0.0207279	0.6	4535	tags=78%, list=24%, signal=102%
EGUCHI_CELL_CYCLE_RB1_TARGETS	EGUCHI_CELL_CYCLE_RB1_TARGETS	Details ...	23	0.903832	1.93555	0	0.0208294	0.605	1819	tags=100%, list=10%, signal=111%
PID_PLK1_PATHWAY	PID_PLK1_PATHWAY	Details ...	43	0.680667	1.93455	0.0043384	0.0209259	0.609	3735	tags=74%, list=20%, signal=93%
PID_AURORA_A_PATHWAY	PID_AURORA_A_PATHWAY	Details ...	30	0.63415	1.93358	0.00419287	0.0210548	0.613	2596	tags=63%, list=14%, signal=73%
REACTOME_BASE_EXCISION_REPAIR	REACTOME_BASE_EXCISION_REPAIR	Details ...	19	0.740328	1.93228	0.00214592	0.0212804	0.617	4208	tags=84%, list=22%, signal=109%
MORI_EMU_MYC_LYMPHOMA_BY_ONSET_TIME_UP	MORI_EMU_MYC_LYMPHOMA_BY_ONSET_TIME_UP	Details ...	99	0.59053	1.93138	0.00215983	0.0213583	0.618	4250	tags=63%, list=23%, signal=81%
MAYBURD_RESPONSE_TO_L663536_DN	MAYBURD_RESPONSE_TO_L663536_DN	Details ...	51	0.599057	1.93069	0	0.0214259	0.62	2504	tags=45%, list=13%, signal=52%
REACTOME_G0_AND_EARLY_G1	REACTOME_G0_AND_EARLY_G1	Details ...	23	0.752005	1.93027	0	0.0213694	0.621	2048	tags=61%, list=11%, signal=68%
OXFORD_RALA_OR_RALB_TARGETS_UP	OXFORD_RALA_OR_RALB_TARGETS_UP	Details ...	45	0.744177	1.9271	0	0.0220991	0.638	4047	tags=84%, list=22%, signal=107%
REACTOME_HIV_INFECTION	REACTOME_HIV_INFECTION	Details ...	184	0.56836	1.92687	0.00217391	0.0220254	0.638	5504	tags=72%, list=29%, signal=101%
MORI_PRE_BI_LYMPHOCYTE_UP	MORI_PRE_BI_LYMPHOCYTE_UP	Details ...	78	0.619703	1.92585	0.00635593	0.0221366	0.641	2996	tags=58%, list=16%, signal=68%
OUELLET_OVARIAN_CANCER_INVASIVE_VS_LMP_UP	OUELLET_OVARIAN_CANCER_INVASIVE_VS_LMP_UP	Details ...	117	0.611752	1.9255	0.00431965	0.0220923	0.643	4521	tags=62%, list=24%, signal=82%
REACTOME_REGULATION_OF_MITOTIC_CELL_CYCLE	REACTOME_REGULATION_OF_MITOTIC_CELL_CYCLE	Details ...	77	0.682743	1.925	0	0.0220791	0.645	3697	tags=73%, list=20%, signal=90%
BURTON_ADIPOGENESIS_PEAK_AT_16HR	BURTON_ADIPOGENESIS_PEAK_AT_16HR	Details ...	40	0.692853	1.92456	0.00614754	0.0220569	0.646	3001	tags=73%, list=16%, signal=86%
DANG_REGULATED_BY_MYC_UP	DANG_REGULATED_BY_MYC_UP	Details ...	71	0.603999	1.92427	0.00438597	0.0219783	0.647	3304	tags=65%, list=18%, signal=78%
REACTOME_ASSEMBLY_OF_THE_PRE_REPLICATIVE_COMPLEX	REACTOME_ASSEMBLY_OF_THE_PRE_REPLICATIVE_COMPLEX	Details ...	63	0.715525	1.92382	0.00212314	0.0219128	0.649	4098	tags=84%, list=22%, signal=107%
ZHAN_MULTIPLE_MYELOMA_SUBGROUPS	ZHAN_MULTIPLE_MYELOMA_SUBGROUPS	Details ...	30	0.732414	1.92347	0	0.0218506	0.65	3462	tags=77%, list=19%, signal=94%
GARY_CD5_TARGETS_DN	GARY_CD5_TARGETS_DN	Details ...	414	0.546318	1.92345	0.0107066	0.0217141	0.65	3480	tags=53%, list=19%, signal=64%
FOURNIER_ACINAR_DEVELOPMENT_LATE_DN	FOURNIER_ACINAR_DEVELOPMENT_LATE_DN	Details ...	21	0.696725	1.92293	0	0.0217444	0.652	3463	tags=76%, list=19%, signal=93%
WILCOX_RESPONSE_TO_PROGESTERONE_UP	WILCOX_RESPONSE_TO_PROGESTERONE_UP	Details ...	140	0.496501	1.92159	0.0105708	0.021931	0.656	3912	tags=46%, list=21%, signal=58%
GARCIA_TARGETS_OF_FLI1_AND_DAX1_DN	GARCIA_TARGETS_OF_FLI1_AND_DAX1_DN	Details ...	163	0.551106	1.92065	0.00430108	0.0220277	0.659	5265	tags=67%, list=28%, signal=93%
WAMUNYOKOLI_OVARIAN_CANCER_GRADES_1_2_UP	WAMUNYOKOLI_OVARIAN_CANCER_GRADES_1_2_UP	Details ...	134	0.622839	1.91984	0.00204499	0.0221019	0.661	5339	tags=74%, list=29%, signal=103%
RHODES_UNDIFFERENTIATED_CANCER	RHODES_UNDIFFERENTIATED_CANCER	Details ...	67	0.724959	1.91912	0.00852879	0.0221399	0.662	2876	tags=76%, list=15%, signal=90%
SCHLOSSER_MYC_TARGETS_AND_SERUM_RESPONSE_UP	SCHLOSSER_MYC_TARGETS_AND_SERUM_RESPONSE_UP	Details ...	46	0.670578	1.91809	0.0043573	0.0222085	0.664	3598	tags=72%, list=19%, signal=89%
ISHIDA_E2F_TARGETS	ISHIDA_E2F_TARGETS	Details ...	50	0.807557	1.91778	0	0.0221601	0.667	1160	tags=76%, list=6%, signal=81%
WAKASUGI_HAVE_ZNF143_BINDING_SITES	WAKASUGI_HAVE_ZNF143_BINDING_SITES	Details ...	56	0.606399	1.91567	0.00819672	0.0225085	0.672	4141	tags=61%, list=22%, signal=78%
CREIGHTON_AKT1_SIGNALING_VIA_MTOR_UP	CREIGHTON_AKT1_SIGNALING_VIA_MTOR_UP	Details ...	33	0.723514	1.91439	0	0.0226943	0.673	3942	tags=76%, list=21%, signal=96%
KOKKINAKIS_METHIONINE_DEPRIVATION_96HR_DN	KOKKINAKIS_METHIONINE_DEPRIVATION_96HR_DN	Details ...	75	0.532384	1.91435	0	0.0225728	0.673	4377	tags=51%, list=23%, signal=66%
PID_E2F_PATHWAY	PID_E2F_PATHWAY	Details ...	73	0.574167	1.91424	0.0021322	0.0224794	0.673	4595	tags=59%, list=25%, signal=78%
YU_MYC_TARGETS_UP	YU_MYC_TARGETS_UP	Details ...	39	0.74539	1.91382	0.00425532	0.0224241	0.673	2624	tags=85%, list=14%, signal=98%
LEE_LIVER_CANCER_SURVIVAL_DN	LEE_LIVER_CANCER_SURVIVAL_DN	Details ...	165	0.582571	1.91198	0.0107527	0.0227642	0.679	5001	tags=68%, list=27%, signal=92%
LE_NEURONAL_DIFFERENTIATION_DN	LE_NEURONAL_DIFFERENTIATION_DN	Details ...	19	0.720203	1.91058	0.00625	0.022971	0.682	1813	tags=63%, list=10%, signal=70%
REACTOME_HOST_INTERACTIONS_OF_HIV_FACTORS	REACTOME_HOST_INTERACTIONS_OF_HIV_FACTORS	Details ...	117	0.583576	1.91038	0.0063425	0.0228703	0.682	3697	tags=62%, list=20%, signal=76%
ABRAMSON_INTERACT_WITH_AIRE	ABRAMSON_INTERACT_WITH_AIRE	Details ...	44	0.705136	1.91035	0.0063425	0.022744	0.682	4461	tags=82%, list=24%, signal=107%
LY_AGING_MIDDLE_DN	LY_AGING_MIDDLE_DN	Details ...	16	0.885807	1.90905	0	0.0230595	0.685	1813	tags=94%, list=10%, signal=104%
KEGG_HOMOLOGOUS_RECOMBINATION	KEGG_HOMOLOGOUS_RECOMBINATION	Details ...	26	0.68976	1.90862	0	0.0230472	0.686	3969	tags=69%, list=21%, signal=88%
BIOCARTA_MCM_PATHWAY	BIOCARTA_MCM_PATHWAY	Details ...	18	0.806182	1.90853	0	0.0229468	0.686	2854	tags=72%, list=15%, signal=85%
WHITFIELD_CELL_CYCLE_G2	WHITFIELD_CELL_CYCLE_G2	Details ...	169	0.509765	1.90712	0.0106383	0.0231282	0.689	3211	tags=47%, list=17%, signal=57%
VANTVEER_BREAST_CANCER_METASTASIS_DN	VANTVEER_BREAST_CANCER_METASTASIS_DN	Details ...	111	0.578307	1.90702	0.012848	0.0230307	0.689	2996	tags=55%, list=16%, signal=65%
MENSSEN_MYC_TARGETS	MENSSEN_MYC_TARGETS	Details ...	51	0.69824	1.90328	0.00221729	0.0239459	0.694	2652	tags=69%, list=14%, signal=80%
SCHLOSSER_MYC_AND_SERUM_RESPONSE_SYNERGY	SCHLOSSER_MYC_AND_SERUM_RESPONSE_SYNERGY	Details ...	31	0.706229	1.90232	0.00416667	0.0240781	0.697	3744	tags=81%, list=20%, signal=101%
PID_AURORA_B_PATHWAY	PID_AURORA_B_PATHWAY	Details ...	37	0.664424	1.90034	0.012987	0.0244802	0.7	2473	tags=68%, list=13%, signal=78%
REACTOME_SIGNALING_BY_WNT	REACTOME_SIGNALING_BY_WNT	Details ...	62	0.631261	1.90027	0.00808081	0.0243806	0.701	4342	tags=71%, list=23%, signal=92%
REACTOME_NUCLEOTIDE_EXCISION_REPAIR	REACTOME_NUCLEOTIDE_EXCISION_REPAIR	Details ...	48	0.633899	1.90012	0	0.0242758	0.701	4641	tags=69%, list=25%, signal=91%
REACTOME_METABOLISM_OF_NUCLEOTIDES	REACTOME_METABOLISM_OF_NUCLEOTIDES	Details ...	70	0.558563	1.89886	0	0.0245108	0.702	4695	tags=57%, list=25%, signal=76%
BENPORATH_ES_1	BENPORATH_ES_1	Details ...	357	0.496754	1.89832	0.00845666	0.0245471	0.705	3635	tags=47%, list=19%, signal=58%
PEART_HDAC_PROLIFERATION_CLUSTER_DN	PEART_HDAC_PROLIFERATION_CLUSTER_DN	Details ...	73	0.558098	1.89713	0.00622407	0.0247206	0.712	2121	tags=41%, list=11%, signal=46%
REACTOME_CHROMOSOME_MAINTENANCE	REACTOME_CHROMOSOME_MAINTENANCE	Details ...	115	0.584287	1.89522	0.00422833	0.0251858	0.717	4717	tags=60%, list=25%, signal=80%
MOOTHA_GLYCOLYSIS	MOOTHA_GLYCOLYSIS	Details ...	19	0.648301	1.893	0.0060241	0.0257178	0.718	1412	tags=37%, list=8%, signal=40%
KEGG_AMINOACYL_TRNA_BIOSYNTHESIS	KEGG_AMINOACYL_TRNA_BIOSYNTHESIS	Details ...	41	0.698005	1.89217	0.00630252	0.0258197	0.722	5178	tags=93%, list=28%, signal=128%
DUTERTRE_ESTRADIOL_RESPONSE_6HR_UP	DUTERTRE_ESTRADIOL_RESPONSE_6HR_UP	Details ...	218	0.477919	1.89177	0.00431965	0.0257743	0.723	2693	tags=41%, list=14%, signal=47%
REACTOME_FORMATION_OF_RNA_POL_II_ELONGATION_COMPLEX_	REACTOME_FORMATION_OF_RNA_POL_II_ELONGATION_COMPLEX_	Details ...	35	0.641576	1.89173	0	0.025657	0.723	5258	tags=80%, list=28%, signal=111%
PUJANA_BREAST_CANCER_LIT_INT_NETWORK	PUJANA_BREAST_CANCER_LIT_INT_NETWORK	Details ...	97	0.580603	1.89152	0.0021692	0.025558	0.723	2900	tags=55%, list=16%, signal=64%
REACTOME_REGULATION_OF_MRNA_STABILITY_BY_PROTEINS_THAT_BIND_AU_RICH_ELEMENTS	REACTOME_REGULATION_OF_MRNA_STABILITY_BY_PROTEINS_THAT_BIND_AU_RICH_ELEMENTS	Details ...	81	0.614531	1.88975	0.00627615	0.0259667	0.728	4098	tags=69%, list=22%, signal=88%
REACTOME_FANCONI_ANEMIA_PATHWAY	REACTOME_FANCONI_ANEMIA_PATHWAY	Details ...	19	0.754119	1.88971	0.00202429	0.0258349	0.728	3441	tags=84%, list=18%, signal=103%
LI_WILMS_TUMOR_ANAPLASTIC_UP	LI_WILMS_TUMOR_ANAPLASTIC_UP	Details ...	19	0.828871	1.88909	0	0.0258621	0.73	1780	tags=84%, list=10%, signal=93%
ZHAN_MULTIPLE_MYELOMA_PR_UP	ZHAN_MULTIPLE_MYELOMA_PR_UP	Details ...	43	0.809993	1.88881	0.00645161	0.0258174	0.731	2579	tags=86%, list=14%, signal=100%
REACTOME_ACTIVATION_OF_NF_KAPPAB_IN_B_CELLS	REACTOME_ACTIVATION_OF_NF_KAPPAB_IN_B_CELLS	Details ...	61	0.617858	1.88858	0.00609756	0.0257581	0.731	4545	tags=70%, list=24%, signal=93%
REACTOME_MICRORNA_MIRNA_BIOGENESIS	REACTOME_MICRORNA_MIRNA_BIOGENESIS		18	0.702801	1.88829	0.00213675	0.0257089	0.731	4082	tags=78%, list=22%, signal=99%
REACTOME_G1_S_SPECIFIC_TRANSCRIPTION	REACTOME_G1_S_SPECIFIC_TRANSCRIPTION		17	0.814997	1.88749	0	0.0257579	0.732	1671	tags=71%, list=9%, signal=77%
REACTOME_E2F_MEDIATED_REGULATION_OF_DNA_REPLICATION	REACTOME_E2F_MEDIATED_REGULATION_OF_DNA_REPLICATION		33	0.732656	1.88632	0.00209644	0.025963	0.735	3735	tags=79%, list=20%, signal=98%
REACTOME_MRNA_3_END_PROCESSING	REACTOME_MRNA_3_END_PROCESSING		33	0.703159	1.88155	0.00431035	0.0272559	0.749	4659	tags=85%, list=25%, signal=113%
REACTOME_LAGGING_STRAND_SYNTHESIS	REACTOME_LAGGING_STRAND_SYNTHESIS		19	0.809958	1.88093	0	0.0272929	0.75	3022	tags=89%, list=16%, signal=107%
REACTOME_RESOLUTION_OF_AP_SITES_VIA_THE_MULTIPLE_NUCLEOTIDE_PATCH_REPLACEMENT_PATHWAY	REACTOME_RESOLUTION_OF_AP_SITES_VIA_THE_MULTIPLE_NUCLEOTIDE_PATCH_REPLACEMENT_PATHWAY		17	0.737132	1.88004	0.00426439	0.0274221	0.75	4208	tags=82%, list=22%, signal=106%
BENPORATH_PROLIFERATION	BENPORATH_PROLIFERATION		136	0.646552	1.87991	0.0150862	0.0273286	0.751	3503	tags=71%, list=19%, signal=87%
HESS_TARGETS_OF_HOXA9_AND_MEIS1_UP	HESS_TARGETS_OF_HOXA9_AND_MEIS1_UP		63	0.563355	1.87985	0.00813008	0.0272065	0.751	3014	tags=54%, list=16%, signal=64%
DAIRKEE_CANCER_PRONE_RESPONSE_BPA	DAIRKEE_CANCER_PRONE_RESPONSE_BPA		50	0.566317	1.87936	0.0021645	0.0272107	0.752	4241	tags=58%, list=23%, signal=75%
MOREAUX_MULTIPLE_MYELOMA_BY_TACI_DN	MOREAUX_MULTIPLE_MYELOMA_BY_TACI_DN		154	0.562684	1.87923	0.012474	0.027123	0.752	5353	tags=66%, list=29%, signal=91%
CAFFAREL_RESPONSE_TO_THC_24HR_5_UP	CAFFAREL_RESPONSE_TO_THC_24HR_5_UP		30	0.650483	1.87846	0.00219298	0.0271993	0.753	3045	tags=53%, list=16%, signal=64%
MOLENAAR_TARGETS_OF_CCND1_AND_CDK4_DN	MOLENAAR_TARGETS_OF_CCND1_AND_CDK4_DN		51	0.655568	1.87689	0.012766	0.0275099	0.757	3207	tags=71%, list=17%, signal=85%
REACTOME_PROCESSING_OF_CAPPED_INTRONLESS_PRE_MRNA	REACTOME_PROCESSING_OF_CAPPED_INTRONLESS_PRE_MRNA		23	0.724978	1.8736	0	0.0284384	0.763	4330	tags=83%, list=23%, signal=107%
GEORGES_CELL_CYCLE_MIR192_TARGETS	GEORGES_CELL_CYCLE_MIR192_TARGETS		61	0.598021	1.87269	0.0150538	0.028588	0.766	2938	tags=56%, list=16%, signal=66%
LI_DCP2_BOUND_MRNA	LI_DCP2_BOUND_MRNA		84	0.638916	1.87144	0.00835073	0.0288455	0.77	6182	tags=83%, list=33%, signal=124%
KEGG_GLYOXYLATE_AND_DICARBOXYLATE_METABOLISM	KEGG_GLYOXYLATE_AND_DICARBOXYLATE_METABOLISM		16	0.731935	1.8696	0.00208333	0.0291776	0.774	3984	tags=75%, list=21%, signal=95%
PID_FANCONI_PATHWAY	PID_FANCONI_PATHWAY		43	0.693315	1.867	0.0110132	0.0297515	0.776	3969	tags=74%, list=21%, signal=94%
RIZ_ERYTHROID_DIFFERENTIATION	RIZ_ERYTHROID_DIFFERENTIATION		74	0.552253	1.86653	0.00842105	0.0297779	0.776	4444	tags=54%, list=24%, signal=71%
REACTOME_APC_C_CDH1_MEDIATED_DEGRADATION_OF_CDC20_AND_OTHER_APC_C_CDH1_TARGETED_PROTEINS_IN_LATE_MITOSIS_EARLY_G1	REACTOME_APC_C_CDH1_MEDIATED_DEGRADATION_OF_CDC20_AND_OTHER_APC_C_CDH1_TARGETED_PROTEINS_IN_LATE_MITOSIS_EARLY_G1		64	0.680002	1.86538	0.00421941	0.0299568	0.777	4098	tags=78%, list=22%, signal=100%
REACTOME_APOPTOSIS	REACTOME_APOPTOSIS		141	0.50137	1.86524	0.00622407	0.0299107	0.777	5033	tags=59%, list=27%, signal=80%
MATTIOLI_MGUS_VS_PCL	MATTIOLI_MGUS_VS_PCL		93	0.574715	1.86504	0.00632911	0.0298446	0.778	2508	tags=46%, list=13%, signal=53%
SHIPP_DLBCL_VS_FOLLICULAR_LYMPHOMA_UP	SHIPP_DLBCL_VS_FOLLICULAR_LYMPHOMA_UP		44	0.689657	1.86477	0.00422833	0.0297949	0.779	3671	tags=75%, list=20%, signal=93%
BOYAULT_LIVER_CANCER_SUBCLASS_G123_UP	BOYAULT_LIVER_CANCER_SUBCLASS_G123_UP		44	0.603345	1.86412	0.0122699	0.0298625	0.781	2081	tags=48%, list=11%, signal=54%
KEGG_ONE_CARBON_POOL_BY_FOLATE	KEGG_ONE_CARBON_POOL_BY_FOLATE		17	0.700648	1.86404	0.00205761	0.0297351	0.781	1706	tags=59%, list=9%, signal=65%
KEGG_MISMATCH_REPAIR	KEGG_MISMATCH_REPAIR		23	0.722895	1.86388	0	0.0296439	0.782	4142	tags=78%, list=22%, signal=100%
REACTOME_APC_C_CDC20_MEDIATED_DEGRADATION_OF_MITOTIC_PROTEINS	REACTOME_APC_C_CDC20_MEDIATED_DEGRADATION_OF_MITOTIC_PROTEINS		65	0.685199	1.86334	0.00421941	0.0296577	0.783	4098	tags=78%, list=22%, signal=100%
REACTOME_CDT1_ASSOCIATION_WITH_THE_CDC6_ORC_ORIGIN_COMPLEX	REACTOME_CDT1_ASSOCIATION_WITH_THE_CDC6_ORC_ORIGIN_COMPLEX		54	0.69782	1.86318	0.0041841	0.0295602	0.783	4098	tags=81%, list=22%, signal=104%
REACTOME_DOWNSTREAM_SIGNALING_EVENTS_OF_B_CELL_RECEPTOR_BCR	REACTOME_DOWNSTREAM_SIGNALING_EVENTS_OF_B_CELL_RECEPTOR_BCR		92	0.521199	1.86314	0.0123711	0.0294376	0.783	5033	tags=60%, list=27%, signal=81%
REACTOME_GLYCOLYSIS	REACTOME_GLYCOLYSIS		25	0.662433	1.86174	0.00208768	0.0296568	0.786	4314	tags=60%, list=23%, signal=78%
REACTOME_METABOLISM_OF_RNA	REACTOME_METABOLISM_OF_RNA		252	0.595675	1.8608	0.0188285	0.0297922	0.788	5579	tags=76%, list=30%, signal=107%
REACTOME_GLUCOSE_TRANSPORT	REACTOME_GLUCOSE_TRANSPORT		37	0.60257	1.86005	0.00408163	0.0299163	0.79	3393	tags=59%, list=18%, signal=72%
REACTOME_TRNA_AMINOACYLATION	REACTOME_TRNA_AMINOACYLATION		42	0.71036	1.85982	0.0063425	0.0298538	0.79	5178	tags=95%, list=28%, signal=131%
SCHLOSSER_MYC_TARGETS_AND_SERUM_RESPONSE_DN	SCHLOSSER_MYC_TARGETS_AND_SERUM_RESPONSE_DN		45	0.692425	1.85917	0.0108696	0.0298597	0.79	3604	tags=78%, list=19%, signal=96%
SIMBULAN_PARP1_TARGETS_DN	SIMBULAN_PARP1_TARGETS_DN		17	0.768123	1.85825	0.00646552	0.030014	0.792	2624	tags=76%, list=14%, signal=89%
PELLICCIOTTA_HDAC_IN_ANTIGEN_PRESENTATION_DN	PELLICCIOTTA_HDAC_IN_ANTIGEN_PRESENTATION_DN		49	0.669591	1.85815	0.00617284	0.0299316	0.792	5500	tags=90%, list=29%, signal=127%
DANG_MYC_TARGETS_UP	DANG_MYC_TARGETS_UP		138	0.614578	1.85769	0.00642398	0.0299193	0.792	4501	tags=67%, list=24%, signal=88%
TANG_SENESCENCE_TP53_TARGETS_DN	TANG_SENESCENCE_TP53_TARGETS_DN		54	0.648797	1.85647	0.0168776	0.0301674	0.797	2079	tags=67%, list=11%, signal=75%
SHEPARD_BMYB_TARGETS	SHEPARD_BMYB_TARGETS		70	0.506425	1.85626	0.00613497	0.0300951	0.798	1002	tags=39%, list=5%, signal=41%
REACTOME_PROCESSIVE_SYNTHESIS_ON_THE_LAGGING_STRAND	REACTOME_PROCESSIVE_SYNTHESIS_ON_THE_LAGGING_STRAND		15	0.800632	1.8556	0	0.0301693	0.801	3022	tags=87%, list=16%, signal=103%
WHITFIELD_CELL_CYCLE_G1_S	WHITFIELD_CELL_CYCLE_G1_S		128	0.531995	1.85407	0.0105708	0.0304878	0.806	2659	tags=45%, list=14%, signal=52%
BURTON_ADIPOGENESIS_5	BURTON_ADIPOGENESIS_5		114	0.559447	1.853	0.0103734	0.0306938	0.807	4376	tags=60%, list=23%, signal=77%
NAKAMURA_CANCER_MICROENVIRONMENT_DN	NAKAMURA_CANCER_MICROENVIRONMENT_DN		43	0.643658	1.8517	0.00888889	0.031002	0.81	3041	tags=60%, list=16%, signal=72%
REACTOME_INTERACTIONS_OF_VPR_WITH_HOST_CELLULAR_PROTEINS	REACTOME_INTERACTIONS_OF_VPR_WITH_HOST_CELLULAR_PROTEINS		31	0.67229	1.85126	0.00217865	0.031001	0.812	3393	tags=71%, list=18%, signal=87%
UDAYAKUMAR_MED1_TARGETS_UP	UDAYAKUMAR_MED1_TARGETS_UP		129	0.493775	1.84872	0.0104603	0.0316521	0.821	4651	tags=54%, list=25%, signal=72%
YAO_TEMPORAL_RESPONSE_TO_PROGESTERONE_CLUSTER_11	YAO_TEMPORAL_RESPONSE_TO_PROGESTERONE_CLUSTER_11		95	0.545265	1.84872	0.00625	0.0315229	0.821	4802	tags=67%, list=26%, signal=90%
REACTOME_RNA_POL_II_TRANSCRIPTION_PRE_INITIATION_AND_PROMOTER_OPENING	REACTOME_RNA_POL_II_TRANSCRIPTION_PRE_INITIATION_AND_PROMOTER_OPENING		39	0.62595	1.84855	0.00219298	0.0314528	0.821	5575	tags=79%, list=30%, signal=113%
PID_BARD1_PATHWAY	PID_BARD1_PATHWAY		28	0.698927	1.84435	0.010352	0.0325169	0.83	2813	tags=71%, list=15%, signal=84%
ZHANG_TLX_TARGETS_36HR_DN	ZHANG_TLX_TARGETS_36HR_DN		182	0.631977	1.84361	0.0170213	0.0325986	0.831	3952	tags=64%, list=21%, signal=80%
RHODES_CANCER_META_SIGNATURE	RHODES_CANCER_META_SIGNATURE		63	0.656055	1.8426	0.0109409	0.0327526	0.836	2804	tags=65%, list=15%, signal=76%
GINESTIER_BREAST_CANCER_ZNF217_AMPLIFIED_DN	GINESTIER_BREAST_CANCER_ZNF217_AMPLIFIED_DN		304	0.50382	1.8426	0.0145228	0.0326216	0.836	5764	tags=66%, list=31%, signal=94%
REACTOME_NEP_NS2_INTERACTS_WITH_THE_CELLULAR_EXPORT_MACHINERY	REACTOME_NEP_NS2_INTERACTS_WITH_THE_CELLULAR_EXPORT_MACHINERY		26	0.730916	1.8413	0.0107527	0.0328768	0.839	3393	tags=81%, list=18%, signal=99%
SPIELMAN_LYMPHOBLAST_EUROPEAN_VS_ASIAN_UP	SPIELMAN_LYMPHOBLAST_EUROPEAN_VS_ASIAN_UP		467	0.494006	1.84125	0.0103093	0.0327671	0.839	5467	tags=60%, list=29%, signal=82%
BENPORATH_ES_CORE_NINE_CORRELATED	BENPORATH_ES_CORE_NINE_CORRELATED		98	0.489859	1.84053	0.004329	0.0328936	0.841	4650	tags=53%, list=25%, signal=70%
MORI_MATURE_B_LYMPHOCYTE_DN	MORI_MATURE_B_LYMPHOCYTE_DN		73	0.540967	1.84033	0.0104167	0.0328219	0.841	2511	tags=45%, list=13%, signal=52%
FISCHER_G1_S_CELL_CYCLE	FISCHER_G1_S_CELL_CYCLE		192	0.488647	1.83962	0.0146138	0.0329036	0.842	2543	tags=41%, list=14%, signal=47%
REACTOME_ELONGATION_ARREST_AND_RECOVERY	REACTOME_ELONGATION_ARREST_AND_RECOVERY		24	0.650837	1.83932	0.00431035	0.0328538	0.842	4521	tags=75%, list=24%, signal=99%
REACTOME_TRANSPORT_OF_MATURE_MRNA_DERIVED_FROM_AN_INTRONLESS_TRANSCRIPT	REACTOME_TRANSPORT_OF_MATURE_MRNA_DERIVED_FROM_AN_INTRONLESS_TRANSCRIPT		31	0.71163	1.8392	0.00645161	0.0327598	0.842	4127	tags=84%, list=22%, signal=107%
SHAFFER_IRF4_TARGETS_IN_ACTIVATED_B_LYMPHOCYTE	SHAFFER_IRF4_TARGETS_IN_ACTIVATED_B_LYMPHOCYTE		76	0.528674	1.8375	0.0043956	0.0331354	0.845	2991	tags=50%, list=16%, signal=59%
CHARAFE_BREAST_CANCER_LUMINAL_VS_MESENCHYMAL_UP	CHARAFE_BREAST_CANCER_LUMINAL_VS_MESENCHYMAL_UP		415	0.483692	1.83431	0.02537	0.034084	0.848	6374	tags=64%, list=34%, signal=94%
KEGG_RNA_POLYMERASE	KEGG_RNA_POLYMERASE		29	0.631089	1.83428	0	0.0339551	0.848	5143	tags=76%, list=27%, signal=104%
REACTOME_TRANSCRIPTION_COUPLED_NER_TC_NER	REACTOME_TRANSCRIPTION_COUPLED_NER_TC_NER		43	0.62702	1.83426	0.00420168	0.0338303	0.848	4641	tags=70%, list=25%, signal=93%
BIOCARTA_G2_PATHWAY	BIOCARTA_G2_PATHWAY		24	0.662877	1.83251	0.0083682	0.0342638	0.851	1859	tags=50%, list=10%, signal=55%
WHITFIELD_CELL_CYCLE_S	WHITFIELD_CELL_CYCLE_S		148	0.504023	1.83141	0.0149893	0.0345301	0.852	3955	tags=46%, list=21%, signal=58%
PID_ATR_PATHWAY	PID_ATR_PATHWAY		39	0.662561	1.82948	0.0154185	0.0350361	0.856	3815	tags=67%, list=20%, signal=84%
HOLLERN_EMT_BREAST_TUMOR_DN	HOLLERN_EMT_BREAST_TUMOR_DN		91	0.602073	1.82876	0.00862069	0.0351634	0.858	5473	tags=71%, list=29%, signal=100%
SCIAN_CELL_CYCLE_TARGETS_OF_TP53_AND_TP73_DN	SCIAN_CELL_CYCLE_TARGETS_OF_TP53_AND_TP73_DN		22	0.781458	1.82804	0.0105708	0.0352391	0.859	2813	tags=86%, list=15%, signal=102%
ZHANG_BREAST_CANCER_PROGENITORS_UP	ZHANG_BREAST_CANCER_PROGENITORS_UP		399	0.522328	1.82763	0.0151844	0.0352271	0.859	4870	tags=58%, list=26%, signal=77%
YAO_TEMPORAL_RESPONSE_TO_PROGESTERONE_CLUSTER_10	YAO_TEMPORAL_RESPONSE_TO_PROGESTERONE_CLUSTER_10		64	0.606212	1.82629	0.00215054	0.03546	0.863	4801	tags=69%, list=26%, signal=92%
JAIN_NFKB_SIGNALING	JAIN_NFKB_SIGNALING		71	0.509255	1.82596	0.00632911	0.0354783	0.863	4449	tags=56%, list=24%, signal=74%
REACTOME_REGULATION_OF_GLUCOKINASE_BY_GLUCOKINASE_REGULATORY_PROTEIN	REACTOME_REGULATION_OF_GLUCOKINASE_BY_GLUCOKINASE_REGULATORY_PROTEIN		26	0.689824	1.82565	0.010661	0.0354454	0.863	3393	tags=73%, list=18%, signal=89%
REACTOME_P53_DEPENDENT_G1_DNA_DAMAGE_RESPONSE	REACTOME_P53_DEPENDENT_G1_DNA_DAMAGE_RESPONSE		53	0.658544	1.82528	0.00426439	0.0354525	0.863	4342	tags=75%, list=23%, signal=98%
CHEN_ETV5_TARGETS_TESTIS	CHEN_ETV5_TARGETS_TESTIS		21	0.693481	1.82435	0.004329	0.0355987	0.864	2813	tags=62%, list=15%, signal=73%
XU_HGF_SIGNALING_NOT_VIA_AKT1_48HR_DN	XU_HGF_SIGNALING_NOT_VIA_AKT1_48HR_DN		20	0.639458	1.82376	0.012474	0.0356484	0.865	1819	tags=50%, list=10%, signal=55%
REACTOME_SCF_BETA_TRCP_MEDIATED_DEGRADATION_OF_EMI1	REACTOME_SCF_BETA_TRCP_MEDIATED_DEGRADATION_OF_EMI1		49	0.682068	1.82294	0.00824742	0.0357533	0.867	4342	tags=80%, list=23%, signal=103%
FARMER_BREAST_CANCER_CLUSTER_2	FARMER_BREAST_CANCER_CLUSTER_2		32	0.82834	1.82293	0.00218818	0.0356307	0.867	2578	tags=91%, list=14%, signal=105%
BIOCARTA_TNFR1_PATHWAY	BIOCARTA_TNFR1_PATHWAY		29	0.58108	1.82185	0.010101	0.0359171	0.869	2723	tags=45%, list=15%, signal=52%
JAERVINEN_AMPLIFIED_IN_LARYNGEAL_CANCER	JAERVINEN_AMPLIFIED_IN_LARYNGEAL_CANCER		37	0.545124	1.82155	0.00823045	0.0358907	0.869	5929	tags=65%, list=32%, signal=95%
PID_MYC_ACTIV_PATHWAY	PID_MYC_ACTIV_PATHWAY		78	0.55704	1.8208	0.0234043	0.0360044	0.87	6008	tags=69%, list=32%, signal=102%
BOYLAN_MULTIPLE_MYELOMA_C_CLUSTER_UP	BOYLAN_MULTIPLE_MYELOMA_C_CLUSTER_UP		37	0.54962	1.81804	0.00877193	0.036838	0.878	3684	tags=51%, list=20%, signal=64%
ZHENG_GLIOBLASTOMA_PLASTICITY_UP	ZHENG_GLIOBLASTOMA_PLASTICITY_UP		240	0.419628	1.81787	0.0123967	0.0367734	0.879	1544	tags=33%, list=8%, signal=35%
REACTOME_SCFSKP2_MEDIATED_DEGRADATION_OF_P27_P21	REACTOME_SCFSKP2_MEDIATED_DEGRADATION_OF_P27_P21		53	0.677759	1.8167	0.00420168	0.0370711	0.885	4342	tags=77%, list=23%, signal=100%
REACTOME_TRANSPORT_OF_RIBONUCLEOPROTEINS_INTO_THE_HOST_NUCLEUS	REACTOME_TRANSPORT_OF_RIBONUCLEOPROTEINS_INTO_THE_HOST_NUCLEUS		26	0.713723	1.81618	0.0108696	0.0371548	0.886	3393	tags=77%, list=18%, signal=94%
SMID_BREAST_CANCER_LUMINAL_A_DN	SMID_BREAST_CANCER_LUMINAL_A_DN		18	0.760659	1.81572	0.010661	0.0371743	0.886	1771	tags=67%, list=9%, signal=74%
LIU_SOX4_TARGETS_DN	LIU_SOX4_TARGETS_DN		293	0.44318	1.81552	0.00884956	0.0370931	0.886	4638	tags=49%, list=25%, signal=64%
MOREAUX_B_LYMPHOCYTE_MATURATION_BY_TACI_DN	MOREAUX_B_LYMPHOCYTE_MATURATION_BY_TACI_DN		66	0.626878	1.81449	0.012685	0.0372646	0.888	3747	tags=64%, list=20%, signal=79%
REACTOME_CYCLIN_A_B1_ASSOCIATED_EVENTS_DURING_G2_M_TRANSITION	REACTOME_CYCLIN_A_B1_ASSOCIATED_EVENTS_DURING_G2_M_TRANSITION		15	0.789807	1.81423	0.0063425	0.0372003	0.889	877	tags=67%, list=5%, signal=70%
REACTOME_P53_INDEPENDENT_G1_S_DNA_DAMAGE_CHECKPOINT	REACTOME_P53_INDEPENDENT_G1_S_DNA_DAMAGE_CHECKPOINT		48	0.68349	1.81372	0.00833333	0.0372466	0.891	4342	tags=83%, list=23%, signal=108%
REACTOME_FORMATION_OF_THE_HIV1_EARLY_ELONGATION_COMPLEX	REACTOME_FORMATION_OF_THE_HIV1_EARLY_ELONGATION_COMPLEX		28	0.635356	1.81295	0.00426439	0.0374004	0.894	4641	tags=75%, list=25%, signal=100%
REACTOME_MRNA_CAPPING	REACTOME_MRNA_CAPPING		28	0.635185	1.81209	0.00430108	0.037558	0.897	5258	tags=79%, list=28%, signal=109%
REACTOME_ABORTIVE_ELONGATION_OF_HIV1_TRANSCRIPT_IN_THE_ABSENCE_OF_TAT	REACTOME_ABORTIVE_ELONGATION_OF_HIV1_TRANSCRIPT_IN_THE_ABSENCE_OF_TAT		19	0.680064	1.81144	0.00424628	0.0377056	0.898	4372	tags=79%, list=23%, signal=103%
POMEROY_MEDULLOBLASTOMA_PROGNOSIS_DN	POMEROY_MEDULLOBLASTOMA_PROGNOSIS_DN		43	0.627203	1.809	0.0125261	0.0384015	0.901	5828	tags=84%, list=31%, signal=121%
RAMASWAMY_METASTASIS_UP	RAMASWAMY_METASTASIS_UP		64	0.524171	1.80865	0.00847458	0.0383827	0.901	5509	tags=69%, list=29%, signal=97%
REACTOME_CDK_MEDIATED_PHOSPHORYLATION_AND_REMOVAL_OF_CDC6	REACTOME_CDK_MEDIATED_PHOSPHORYLATION_AND_REMOVAL_OF_CDC6		46	0.687387	1.80751	0.0124224	0.038678	0.904	4342	tags=83%, list=23%, signal=107%
GOLDRATH_ANTIGEN_RESPONSE	GOLDRATH_ANTIGEN_RESPONSE		331	0.458443	1.80706	0.0142276	0.0387272	0.904	2577	tags=36%, list=14%, signal=41%
YAMAZAKI_TCEB3_TARGETS_DN	YAMAZAKI_TCEB3_TARGETS_DN		205	0.435503	1.807	0.00223214	0.0386129	0.904	4650	tags=49%, list=25%, signal=65%
REACTOME_ER_PHAGOSOME_PATHWAY	REACTOME_ER_PHAGOSOME_PATHWAY		58	0.663751	1.8067	0.0101833	0.0386029	0.904	5033	tags=83%, list=27%, signal=113%
JEON_SMAD6_TARGETS_DN	JEON_SMAD6_TARGETS_DN		19	0.649458	1.80615	0.00652174	0.0386636	0.904	1048	tags=47%, list=6%, signal=50%
WHITFIELD_CELL_CYCLE_G2_M	WHITFIELD_CELL_CYCLE_G2_M		196	0.483666	1.80347	0.01566	0.039496	0.906	4538	tags=56%, list=24%, signal=73%
IVANOVA_HEMATOPOIESIS_INTERMEDIATE_PROGENITOR	IVANOVA_HEMATOPOIESIS_INTERMEDIATE_PROGENITOR		140	0.471013	1.80344	0	0.0393695	0.906	4032	tags=49%, list=22%, signal=61%
WANG_CISPLATIN_RESPONSE_AND_XPC_UP	WANG_CISPLATIN_RESPONSE_AND_XPC_UP		194	0.455707	1.80265	0.00421053	0.0394873	0.906	3631	tags=42%, list=19%, signal=52%
IVANOVA_HEMATOPOIESIS_EARLY_PROGENITOR	IVANOVA_HEMATOPOIESIS_EARLY_PROGENITOR		490	0.395835	1.80145	0.00207039	0.0397798	0.907	4806	tags=46%, list=26%, signal=60%
REACTOME_MITOCHONDRIAL_TRNA_AMINOACYLATION	REACTOME_MITOCHONDRIAL_TRNA_AMINOACYLATION		21	0.732655	1.80023	0.0102881	0.0400994	0.908	1752	tags=71%, list=9%, signal=79%
REACTOME_CYCLIN_E_ASSOCIATED_EVENTS_DURING_G1_S_TRANSITION_	REACTOME_CYCLIN_E_ASSOCIATED_EVENTS_DURING_G1_S_TRANSITION_		62	0.655207	1.79975	0.00421941	0.0401482	0.908	4342	tags=74%, list=23%, signal=96%
REACTOME_AUTODEGRADATION_OF_CDH1_BY_CDH1_APC_C	REACTOME_AUTODEGRADATION_OF_CDH1_BY_CDH1_APC_C		56	0.671636	1.79859	0.00630252	0.0404501	0.909	4548	tags=80%, list=24%, signal=106%
IIZUKA_LIVER_CANCER_PROGRESSION_G1_G2_DN	IIZUKA_LIVER_CANCER_PROGRESSION_G1_G2_DN		24	0.625491	1.79822	0.0124224	0.0404673	0.909	4741	tags=63%, list=25%, signal=84%
BIOCARTA_MITOCHONDRIA_PATHWAY	BIOCARTA_MITOCHONDRIA_PATHWAY		21	0.650879	1.79786	0.00204082	0.0404785	0.91	2487	tags=67%, list=13%, signal=77%
BHATTACHARYA_EMBRYONIC_STEM_CELL	BHATTACHARYA_EMBRYONIC_STEM_CELL		87	0.545174	1.79445	0.0130152	0.0416176	0.917	4421	tags=61%, list=24%, signal=79%
MARTINEZ_RESPONSE_TO_TRABECTEDIN_DN	MARTINEZ_RESPONSE_TO_TRABECTEDIN_DN		265	0.47771	1.79244	0.0234542	0.0422556	0.919	4469	tags=57%, list=24%, signal=73%
KEGG_PROTEASOME	KEGG_PROTEASOME		43	0.694015	1.79194	0.0103734	0.0423074	0.92	4342	tags=81%, list=23%, signal=106%
KEGG_TERPENOID_BACKBONE_BIOSYNTHESIS	KEGG_TERPENOID_BACKBONE_BIOSYNTHESIS		15	0.728771	1.79188	0.00631579	0.0421919	0.92	3521	tags=67%, list=19%, signal=82%
REACTOME_REGULATION_OF_APOPTOSIS	REACTOME_REGULATION_OF_APOPTOSIS		56	0.597784	1.79125	0.0203666	0.0423189	0.92	4342	tags=68%, list=23%, signal=88%
REACTOME_REGULATION_OF_ORNITHINE_DECARBOXYLASE_ODC	REACTOME_REGULATION_OF_ORNITHINE_DECARBOXYLASE_ODC		48	0.669161	1.79076	0.0104603	0.0423916	0.921	4342	tags=81%, list=23%, signal=106%
SHEPARD_CRUSH_AND_BURN_MUTANT_DN	SHEPARD_CRUSH_AND_BURN_MUTANT_DN		174	0.431755	1.79015	0.0104384	0.0424621	0.922	2303	tags=34%, list=12%, signal=39%
XU_RESPONSE_TO_TRETINOIN_AND_NSC682994_DN	XU_RESPONSE_TO_TRETINOIN_AND_NSC682994_DN		15	0.772843	1.79012	0.00434783	0.0423335	0.922	3419	tags=87%, list=18%, signal=106%
REACTOME_REGULATORY_RNA_PATHWAYS	REACTOME_REGULATORY_RNA_PATHWAYS		21	0.601001	1.78924	0.00647948	0.0425866	0.923	4082	tags=67%, list=22%, signal=85%
ACOSTA_PROLIFERATION_INDEPENDENT_MYC_TARGETS_UP	ACOSTA_PROLIFERATION_INDEPENDENT_MYC_TARGETS_UP		75	0.521949	1.78812	0.0164271	0.0428887	0.925	4436	tags=53%, list=24%, signal=70%
GROSS_HYPOXIA_VIA_HIF1A_UP	GROSS_HYPOXIA_VIA_HIF1A_UP		75	0.528088	1.78794	0.0110619	0.0428254	0.925	3611	tags=52%, list=19%, signal=64%
REACTOME_METABOLISM_OF_MRNA	REACTOME_METABOLISM_OF_MRNA		208	0.578604	1.78386	0.0226337	0.0441856	0.929	6506	tags=82%, list=35%, signal=125%
OUELLET_CULTURED_OVARIAN_CANCER_INVASIVE_VS_LMP_UP	OUELLET_CULTURED_OVARIAN_CANCER_INVASIVE_VS_LMP_UP		65	0.506155	1.78202	0.00831601	0.044729	0.932	6136	tags=71%, list=33%, signal=105%
REACTOME_G1_PHASE	REACTOME_G1_PHASE		35	0.572275	1.78124	0.0125261	0.0449203	0.932	6873	tags=77%, list=37%, signal=122%
CHEMNITZ_RESPONSE_TO_PROSTAGLANDIN_E2_UP	CHEMNITZ_RESPONSE_TO_PROSTAGLANDIN_E2_UP		129	0.514047	1.77869	0.0273684	0.0457831	0.938	2858	tags=52%, list=15%, signal=61%
REACTOME_DESTABILIZATION_OF_MRNA_BY_AUF1_HNRNP_D0	REACTOME_DESTABILIZATION_OF_MRNA_BY_AUF1_HNRNP_D0		50	0.66269	1.77863	0.0123711	0.0456644	0.938	4342	tags=80%, list=23%, signal=104%
REACTOME_METABOLISM_OF_AMINO_ACIDS_AND_DERIVATIVES	REACTOME_METABOLISM_OF_AMINO_ACIDS_AND_DERIVATIVES		190	0.465407	1.77791	0.00213675	0.0458047	0.939	4536	tags=47%, list=24%, signal=61%
PID_DNA_PK_PATHWAY	PID_DNA_PK_PATHWAY		16	0.61835	1.77654	0.00828157	0.0461801	0.94	3686	tags=63%, list=20%, signal=78%
SU_TESTIS	SU_TESTIS		70	0.529304	1.7758	0.0191898	0.0463284	0.94	4633	tags=50%, list=25%, signal=66%
WIERENGA_PML_INTERACTOME	WIERENGA_PML_INTERACTOME		40	0.552596	1.7753	0.0127389	0.0463725	0.94	2572	tags=48%, list=14%, signal=55%
PYEON_CANCER_HEAD_AND_NECK_VS_CERVICAL_UP	PYEON_CANCER_HEAD_AND_NECK_VS_CERVICAL_UP		169	0.546165	1.77495	0.0275424	0.046377	0.94	4539	tags=55%, list=24%, signal=72%
REACTOME_AUTODEGRADATION_OF_THE_E3_UBIQUITIN_LIGASE_COP1	REACTOME_AUTODEGRADATION_OF_THE_E3_UBIQUITIN_LIGASE_COP1		47	0.664799	1.77436	0.010395	0.0464924	0.941	4342	tags=81%, list=23%, signal=105%
STEIN_ESRRA_TARGETS_UP	STEIN_ESRRA_TARGETS_UP		361	0.460684	1.77323	0.0166667	0.0468234	0.942	5116	tags=56%, list=27%, signal=76%
WONG_MITOCHONDRIA_GENE_MODULE	WONG_MITOCHONDRIA_GENE_MODULE		216	0.596439	1.7725	0.0167015	0.0470001	0.942	5915	tags=77%, list=32%, signal=111%
BIOCARTA_FAS_PATHWAY	BIOCARTA_FAS_PATHWAY		30	0.581063	1.77061	0.00998004	0.0475823	0.942	2723	tags=50%, list=15%, signal=58%
YUAN_ZNF143_PARTNERS	YUAN_ZNF143_PARTNERS		21	0.686512	1.76972	0.00852879	0.0478045	0.943	4951	tags=90%, list=26%, signal=123%
REACTOME_SYNTHESIS_AND_INTERCONVERSION_OF_NUCLEOTIDE_DI_AND_TRIPHOSPHATES	REACTOME_SYNTHESIS_AND_INTERCONVERSION_OF_NUCLEOTIDE_DI_AND_TRIPHOSPHATES		18	0.68019	1.76845	0.0188285	0.0481614	0.944	4034	tags=72%, list=22%, signal=92%
REACTOME_CYTOSOLIC_TRNA_AMINOACYLATION	REACTOME_CYTOSOLIC_TRNA_AMINOACYLATION		24	0.729869	1.76822	0.0125786	0.0481094	0.944	2571	tags=75%, list=14%, signal=87%
REACTOME_MITOCHONDRIAL_PROTEIN_IMPORT	REACTOME_MITOCHONDRIAL_PROTEIN_IMPORT		48	0.660942	1.76586	0.0143149	0.0490118	0.946	5136	tags=88%, list=27%, signal=120%
KIM_WT1_TARGETS_DN	KIM_WT1_TARGETS_DN		428	0.423954	1.76463	0.0189873	0.0493447	0.947	3915	tags=42%, list=21%, signal=52%
HOSHIDA_LIVER_CANCER_SUBCLASS_S2	HOSHIDA_LIVER_CANCER_SUBCLASS_S2		113	0.524547	1.76426	0.0257511	0.0493759	0.947	5828	tags=63%, list=31%, signal=91%
BILD_MYC_ONCOGENIC_SIGNATURE	BILD_MYC_ONCOGENIC_SIGNATURE		188	0.43841	1.76266	0.0321888	0.049944	0.949	3622	tags=44%, list=19%, signal=54%
LANDIS_BREAST_CANCER_PROGRESSION_UP	LANDIS_BREAST_CANCER_PROGRESSION_UP		40	0.572794	1.76175	0.0193133	0.0501766	0.951	5827	tags=75%, list=31%, signal=109%
YU_BAP1_TARGETS	YU_BAP1_TARGETS		29	0.592574	1.76084	0.018711	0.0504046	0.953	2664	tags=52%, list=14%, signal=60%
LEE_METASTASIS_AND_RNA_PROCESSING_UP	LEE_METASTASIS_AND_RNA_PROCESSING_UP		17	0.730613	1.75746	0.00437637	0.0517407	0.957	3348	tags=82%, list=18%, signal=100%
STEIN_ESRRA_TARGETS	STEIN_ESRRA_TARGETS		496	0.417556	1.75673	0.00842105	0.0519463	0.957	5116	tags=51%, list=27%, signal=69%
REICHERT_MITOSIS_LIN9_TARGETS	REICHERT_MITOSIS_LIN9_TARGETS		27	0.723177	1.75616	0.0268595	0.0520787	0.957	1225	tags=70%, list=7%, signal=75%
KEGG_PENTOSE_PHOSPHATE_PATHWAY	KEGG_PENTOSE_PHOSPHATE_PATHWAY		26	0.584375	1.75545	0.014	0.0522614	0.958	5250	tags=58%, list=28%, signal=80%
REACTOME_ANTIVIRAL_MECHANISM_BY_IFN_STIMULATED_GENES	REACTOME_ANTIVIRAL_MECHANISM_BY_IFN_STIMULATED_GENES		64	0.531335	1.7551	0.0214592	0.0522704	0.958	3441	tags=50%, list=18%, signal=61%
VANOEVELEN_MYOGENESIS_SIN3A_TARGETS	VANOEVELEN_MYOGENESIS_SIN3A_TARGETS		209	0.419826	1.75444	0.00214133	0.0524378	0.96	5104	tags=51%, list=27%, signal=70%
FINETTI_BREAST_CANCER_KINOME_RED	FINETTI_BREAST_CANCER_KINOME_RED		16	0.849997	1.75366	0.00430108	0.0526301	0.96	2819	tags=100%, list=15%, signal=118%
YAO_TEMPORAL_RESPONSE_TO_PROGESTERONE_CLUSTER_14	YAO_TEMPORAL_RESPONSE_TO_PROGESTERONE_CLUSTER_14		134	0.522554	1.75323	0.0336842	0.0526493	0.96	3394	tags=54%, list=18%, signal=66%
PID_HIV_NEF_PATHWAY	PID_HIV_NEF_PATHWAY		35	0.55416	1.75308	0.0197628	0.0525552	0.96	2505	tags=43%, list=13%, signal=49%
REACTOME_VIF_MEDIATED_DEGRADATION_OF_APOBEC3G	REACTOME_VIF_MEDIATED_DEGRADATION_OF_APOBEC3G		47	0.664199	1.75221	0.0205761	0.0528176	0.963	4342	tags=79%, list=23%, signal=102%
REACTOME_TELOMERE_MAINTENANCE	REACTOME_TELOMERE_MAINTENANCE		74	0.604516	1.75101	0.0291667	0.0532232	0.964	4717	tags=59%, list=25%, signal=79%
WATANABE_RECTAL_CANCER_RADIOTHERAPY_RESPONSIVE_UP	WATANABE_RECTAL_CANCER_RADIOTHERAPY_RESPONSIVE_UP		104	0.459544	1.75095	0.0122699	0.0531052	0.964	6950	tags=67%, list=37%, signal=106%
REACTOME_PYRUVATE_METABOLISM_AND_CITRIC_ACID_TCA_CYCLE	REACTOME_PYRUVATE_METABOLISM_AND_CITRIC_ACID_TCA_CYCLE		40	0.601294	1.75043	0.0253165	0.0532251	0.965	5074	tags=75%, list=27%, signal=103%
KEGG_CITRATE_CYCLE_TCA_CYCLE	KEGG_CITRATE_CYCLE_TCA_CYCLE		29	0.68297	1.75042	0.0226337	0.0530781	0.965	5074	tags=83%, list=27%, signal=113%
CHOI_ATL_STAGE_PREDICTOR	CHOI_ATL_STAGE_PREDICTOR		38	0.562653	1.75012	0.0125786	0.0530374	0.965	5715	tags=63%, list=31%, signal=91%
IRITANI_MAD1_TARGETS_DN	IRITANI_MAD1_TARGETS_DN		46	0.643671	1.74848	0.0325203	0.0536367	0.968	4662	tags=76%, list=25%, signal=101%
BORCZUK_MALIGNANT_MESOTHELIOMA_UP	BORCZUK_MALIGNANT_MESOTHELIOMA_UP		291	0.489309	1.74629	0.0506329	0.0545376	0.97	5232	tags=61%, list=28%, signal=84%
WALLACE_JAK2_TARGETS_UP	WALLACE_JAK2_TARGETS_UP		25	0.617085	1.74472	0.0102459	0.0551298	0.97	4922	tags=64%, list=26%, signal=87%
BIOCARTA_PROTEASOME_PATHWAY	BIOCARTA_PROTEASOME_PATHWAY		28	0.712746	1.74349	0.0104167	0.0555108	0.97	4342	tags=89%, list=23%, signal=116%
REACTOME_DOUBLE_STRAND_BREAK_REPAIR	REACTOME_DOUBLE_STRAND_BREAK_REPAIR		21	0.669867	1.74287	0.0164609	0.0555797	0.971	3562	tags=67%, list=19%, signal=82%
BILANGES_RAPAMYCIN_SENSITIVE_GENES	BILANGES_RAPAMYCIN_SENSITIVE_GENES		38	0.50078	1.74268	0.0146751	0.0555182	0.971	6921	tags=74%, list=37%, signal=117%
CHIANG_LIVER_CANCER_SUBCLASS_UNANNOTATED_DN	CHIANG_LIVER_CANCER_SUBCLASS_UNANNOTATED_DN		182	0.537083	1.74062	0.0480167	0.0563728	0.973	3697	tags=53%, list=20%, signal=66%
ZAMORA_NOS2_TARGETS_UP	ZAMORA_NOS2_TARGETS_UP		65	0.553002	1.73987	0.0175824	0.056569	0.973	3719	tags=54%, list=20%, signal=67%
KARLSSON_TGFB1_TARGETS_UP	KARLSSON_TGFB1_TARGETS_UP		118	0.510863	1.73953	0.0304348	0.0565593	0.973	4985	tags=66%, list=27%, signal=90%
RICKMAN_TUMOR_DIFFERENTIATED_MODERATELY_VS_POORLY_DN	RICKMAN_TUMOR_DIFFERENTIATED_MODERATELY_VS_POORLY_DN		15	0.723167	1.73914	0.00840336	0.0566028	0.973	3639	tags=73%, list=19%, signal=91%
REACTOME_POST_TRANSLATIONAL_MODIFICATION_SYNTHESIS_OF_GPI_ANCHORED_PROTEINS	REACTOME_POST_TRANSLATIONAL_MODIFICATION_SYNTHESIS_OF_GPI_ANCHORED_PROTEINS		26	0.574144	1.73895	0.0202429	0.0565277	0.973	5605	tags=62%, list=30%, signal=88%
EPPERT_PROGENITOR	EPPERT_PROGENITOR		125	0.492625	1.73823	0.0443038	0.0567094	0.973	3189	tags=51%, list=17%, signal=61%
YAO_TEMPORAL_RESPONSE_TO_PROGESTERONE_CLUSTER_17	YAO_TEMPORAL_RESPONSE_TO_PROGESTERONE_CLUSTER_17		171	0.541922	1.73599	0.0407332	0.0575288	0.973	5880	tags=71%, list=31%, signal=103%
KUROKAWA_LIVER_CANCER_CHEMOTHERAPY_DN	KUROKAWA_LIVER_CANCER_CHEMOTHERAPY_DN		38	0.513828	1.73517	0.010352	0.0577439	0.974	4420	tags=42%, list=24%, signal=55%
WONG_PROTEASOME_GENE_MODULE	WONG_PROTEASOME_GENE_MODULE		49	0.568296	1.73431	0.0382979	0.0579426	0.975	4098	tags=61%, list=22%, signal=78%
REACTOME_METABOLISM_OF_PROTEINS	REACTOME_METABOLISM_OF_PROTEINS		416	0.468019	1.73261	0.0222222	0.0585959	0.975	5749	tags=59%, list=31%, signal=84%
REACTOME_INHIBITION_OF_THE_PROTEOLYTIC_ACTIVITY_OF_APC_C_REQUIRED_FOR_THE_ONSET_OF_ANAPHASE_BY_MITOTIC_SPINDLE_CHECKPOINT_COMPONENTS	REACTOME_INHIBITION_OF_THE_PROTEOLYTIC_ACTIVITY_OF_APC_C_REQUIRED_FOR_THE_ONSET_OF_ANAPHASE_BY_MITOTIC_SPINDLE_CHECKPOINT_COMPONENTS		18	0.701569	1.72971	0.013363	0.0597897	0.977	3150	tags=67%, list=17%, signal=80%
REACTOME_DESTABILIZATION_OF_MRNA_BY_KSRP	REACTOME_DESTABILIZATION_OF_MRNA_BY_KSRP		17	0.655393	1.72853	0.017094	0.0601998	0.977	3594	tags=65%, list=19%, signal=80%
SHEPARD_BMYB_MORPHOLINO_DN	SHEPARD_BMYB_MORPHOLINO_DN		194	0.40362	1.72782	0.00414079	0.0604269	0.977	2928	tags=35%, list=16%, signal=41%
BIOCARTA_ATRBRCA_PATHWAY	BIOCARTA_ATRBRCA_PATHWAY		19	0.665534	1.7267	0.0163265	0.060838	0.977	2722	tags=63%, list=15%, signal=74%
VECCHI_GASTRIC_CANCER_ADVANCED_VS_EARLY_DN	VECCHI_GASTRIC_CANCER_ADVANCED_VS_EARLY_DN		126	0.529408	1.72547	0.026694	0.061254	0.977	6681	tags=63%, list=36%, signal=97%
ACEVEDO_NORMAL_TISSUE_ADJACENT_TO_LIVER_TUMOR_DN	ACEVEDO_NORMAL_TISSUE_ADJACENT_TO_LIVER_TUMOR_DN		339	0.424672	1.72202	0.0162933	0.0628735	0.977	6056	tags=56%, list=32%, signal=81%
SCHMIDT_POR_TARGETS_IN_LIMB_BUD_UP	SCHMIDT_POR_TARGETS_IN_LIMB_BUD_UP		25	0.650262	1.72202	0.0210526	0.0627086	0.977	4274	tags=72%, list=23%, signal=93%
MOOTHA_TCA	MOOTHA_TCA		16	0.743422	1.72149	0.0182556	0.0628154	0.978	4558	tags=94%, list=24%, signal=124%
JIANG_HYPOXIA_VIA_VHL	JIANG_HYPOXIA_VIA_VHL		33	0.563242	1.72109	0.0149893	0.0628639	0.978	3607	tags=48%, list=19%, signal=60%
GRADE_METASTASIS_DN	GRADE_METASTASIS_DN		42	0.61171	1.72003	0.026694	0.0632249	0.98	6042	tags=74%, list=32%, signal=109%
SESTO_RESPONSE_TO_UV_C4	SESTO_RESPONSE_TO_UV_C4		20	0.613027	1.71857	0.0169851	0.0638068	0.98	3231	tags=50%, list=17%, signal=60%
DELPUECH_FOXO3_TARGETS_DN	DELPUECH_FOXO3_TARGETS_DN		39	0.603761	1.71825	0.0198238	0.0637852	0.98	4302	tags=67%, list=23%, signal=86%
ELVIDGE_HYPOXIA_DN	ELVIDGE_HYPOXIA_DN		136	0.490216	1.71784	0.0107991	0.0638372	0.98	4574	tags=52%, list=24%, signal=69%
RAHMAN_TP53_TARGETS_PHOSPHORYLATED	RAHMAN_TP53_TARGETS_PHOSPHORYLATED		21	0.671488	1.7149	0.0186722	0.065191	0.982	5337	tags=81%, list=29%, signal=113%
PID_HDAC_CLASSI_PATHWAY	PID_HDAC_CLASSI_PATHWAY		65	0.464609	1.71416	0.0149254	0.0653855	0.982	5377	tags=55%, list=29%, signal=77%
DAIRKEE_CANCER_PRONE_RESPONSE_BPA_E2	DAIRKEE_CANCER_PRONE_RESPONSE_BPA_E2		113	0.478341	1.71284	0.0364807	0.0659298	0.982	2261	tags=42%, list=12%, signal=47%
REACTOME_DEADENYLATION_OF_MRNA	REACTOME_DEADENYLATION_OF_MRNA		17	0.651781	1.71243	0.0205011	0.0659774	0.982	3421	tags=59%, list=18%, signal=72%
REACTOME_RNA_POL_I_RNA_POL_III_AND_MITOCHONDRIAL_TRANSCRIPTION	REACTOME_RNA_POL_I_RNA_POL_III_AND_MITOCHONDRIAL_TRANSCRIPTION		113	0.525128	1.71239	0.0285088	0.0658207	0.982	5884	tags=64%, list=31%, signal=92%
SMITH_TERT_TARGETS_UP	SMITH_TERT_TARGETS_UP		141	0.445705	1.71202	0.0232068	0.0658667	0.983	3796	tags=45%, list=20%, signal=57%
REACTOME_DEPOSITION_OF_NEW_CENPA_CONTAINING_NUCLEOSOMES_AT_THE_CENTROMERE	REACTOME_DEPOSITION_OF_NEW_CENPA_CONTAINING_NUCLEOSOMES_AT_THE_CENTROMERE		59	0.630128	1.7119	0.0258065	0.0657559	0.983	4717	tags=63%, list=25%, signal=84%
SCIBETTA_KDM5B_TARGETS_DN	SCIBETTA_KDM5B_TARGETS_DN		77	0.449723	1.71183	0.0231092	0.0656374	0.983	2639	tags=34%, list=14%, signal=39%
KEGG_FRUCTOSE_AND_MANNOSE_METABOLISM	KEGG_FRUCTOSE_AND_MANNOSE_METABOLISM		34	0.555658	1.71181	0.0123711	0.0654736	0.984	4314	tags=50%, list=23%, signal=65%
WU_HBX_TARGETS_2_UP	WU_HBX_TARGETS_2_UP		22	0.578607	1.71102	0.0146138	0.0657437	0.984	5110	tags=59%, list=27%, signal=81%
PYEON_HPV_POSITIVE_TUMORS_UP	PYEON_HPV_POSITIVE_TUMORS_UP		84	0.555527	1.71086	0.0359408	0.0656715	0.984	3576	tags=50%, list=19%, signal=62%
FAELT_B_CLL_WITH_VH3_21_UP	FAELT_B_CLL_WITH_VH3_21_UP		42	0.595301	1.71079	0.0414079	0.0655561	0.984	3236	tags=55%, list=17%, signal=66%
WALLACE_PROSTATE_CANCER_UP	WALLACE_PROSTATE_CANCER_UP		20	0.648253	1.71074	0.0184426	0.0654156	0.984	4395	tags=70%, list=23%, signal=91%
REACTOME_KINESINS	REACTOME_KINESINS		24	0.620849	1.71063	0.0446809	0.0653197	0.984	4756	tags=71%, list=25%, signal=95%
REACTOME_INFLUENZA_LIFE_CYCLE	REACTOME_INFLUENZA_LIFE_CYCLE		134	0.609919	1.71007	0.0526316	0.0654324	0.984	6824	tags=91%, list=36%, signal=142%
HU_GENOTOXIC_DAMAGE_24HR	HU_GENOTOXIC_DAMAGE_24HR		32	0.560534	1.70848	0.028	0.0660102	0.984	5571	tags=56%, list=30%, signal=80%
CAFFAREL_RESPONSE_TO_THC_DN	CAFFAREL_RESPONSE_TO_THC_DN		29	0.58104	1.70586	0.0373444	0.067341	0.986	1775	tags=48%, list=9%, signal=53%
STEIN_ESRRA_TARGETS_RESPONSIVE_TO_ESTROGEN_DN	STEIN_ESRRA_TARGETS_RESPONSIVE_TO_ESTROGEN_DN		39	0.570333	1.70375	0.0386266	0.0682208	0.987	1750	tags=49%, list=9%, signal=54%
REACTOME_PHOSPHORYLATION_OF_THE_APC_C	REACTOME_PHOSPHORYLATION_OF_THE_APC_C		17	0.690529	1.70327	0.010846	0.0682964	0.987	3150	tags=65%, list=17%, signal=78%
REACTOME_APC_CDC20_MEDIATED_DEGRADATION_OF_NEK2A	REACTOME_APC_CDC20_MEDIATED_DEGRADATION_OF_NEK2A		21	0.681064	1.70263	0.00886918	0.0684262	0.987	3441	tags=67%, list=18%, signal=82%
RHEIN_ALL_GLUCOCORTICOID_THERAPY_DN	RHEIN_ALL_GLUCOCORTICOID_THERAPY_DN		350	0.483965	1.70162	0.0443975	0.0689	0.987	4461	tags=58%, list=24%, signal=75%
SASAKI_ADULT_T_CELL_LEUKEMIA	SASAKI_ADULT_T_CELL_LEUKEMIA		168	0.439034	1.70151	0.0246407	0.0687719	0.987	2746	tags=38%, list=15%, signal=44%
MEINHOLD_OVARIAN_CANCER_LOW_GRADE_DN	MEINHOLD_OVARIAN_CANCER_LOW_GRADE_DN		20	0.668392	1.69959	0.0195228	0.0696507	0.988	2888	tags=65%, list=15%, signal=77%
CHANGOLKAR_H2AFY_TARGETS_UP	CHANGOLKAR_H2AFY_TARGETS_UP		47	0.475718	1.69952	0.00209205	0.0695014	0.988	4592	tags=43%, list=25%, signal=56%
AFFAR_YY1_TARGETS_DN	AFFAR_YY1_TARGETS_DN		227	0.391124	1.69761	0.0311203	0.0703813	0.988	3022	tags=40%, list=16%, signal=47%
MONNIER_POSTRADIATION_TUMOR_ESCAPE_UP	MONNIER_POSTRADIATION_TUMOR_ESCAPE_UP		375	0.40019	1.69687	0.0256959	0.0705954	0.988	4313	tags=48%, list=23%, signal=61%
GRAHAM_CML_QUIESCENT_VS_NORMAL_QUIESCENT_UP	GRAHAM_CML_QUIESCENT_VS_NORMAL_QUIESCENT_UP		80	0.453265	1.696	0.0163599	0.0708951	0.989	1587	tags=35%, list=8%, signal=38%
BIOCARTA_HIVNEF_PATHWAY	BIOCARTA_HIVNEF_PATHWAY		58	0.496063	1.69238	0.0301811	0.0726828	0.991	4022	tags=47%, list=21%, signal=59%
KLEIN_PRIMARY_EFFUSION_LYMPHOMA_UP	KLEIN_PRIMARY_EFFUSION_LYMPHOMA_UP		50	0.486228	1.69158	0.0206186	0.072958	0.992	4089	tags=44%, list=22%, signal=56%
KEGG_PEROXISOME	KEGG_PEROXISOME		78	0.483925	1.69082	0.0274841	0.0732333	0.992	6204	tags=60%, list=33%, signal=90%
NAKAYAMA_SOFT_TISSUE_TUMORS_PCA2_UP	NAKAYAMA_SOFT_TISSUE_TUMORS_PCA2_UP		86	0.491913	1.68674	0.055794	0.0753488	0.993	1819	tags=42%, list=10%, signal=46%
PODAR_RESPONSE_TO_ADAPHOSTIN_DN	PODAR_RESPONSE_TO_ADAPHOSTIN_DN		18	0.629255	1.68423	0.0194805	0.0765835	0.993	2952	tags=67%, list=16%, signal=79%
REACTOME_FORMATION_OF_TRANSCRIPTION_COUPLED_NER_TC_NER_REPAIR_COMPLEX	REACTOME_FORMATION_OF_TRANSCRIPTION_COUPLED_NER_TC_NER_REPAIR_COMPLEX		28	0.570855	1.68299	0.021097	0.0770865	0.993	6439	tags=79%, list=34%, signal=120%
REACTOME_RNA_POL_III_TRANSCRIPTION_INITIATION_FROM_TYPE_2_PROMOTER	REACTOME_RNA_POL_III_TRANSCRIPTION_INITIATION_FROM_TYPE_2_PROMOTER		23	0.588406	1.68142	0.0218818	0.0778259	0.993	4082	tags=70%, list=22%, signal=89%
JUBAN_TARGETS_OF_SPI1_AND_FLI1_DN	JUBAN_TARGETS_OF_SPI1_AND_FLI1_DN		84	0.466252	1.68078	0.0339703	0.0780097	0.993	3431	tags=46%, list=18%, signal=57%
BROWN_MYELOID_CELL_DEVELOPMENT_DN	BROWN_MYELOID_CELL_DEVELOPMENT_DN		119	0.424753	1.68067	0.0145833	0.0778691	0.993	3837	tags=45%, list=21%, signal=56%
GALE_APL_WITH_FLT3_MUTATED_UP	GALE_APL_WITH_FLT3_MUTATED_UP		53	0.489153	1.67842	0.0303644	0.0790259	0.993	3046	tags=42%, list=16%, signal=49%
REACTOME_BRANCHED_CHAIN_AMINO_ACID_CATABOLISM	REACTOME_BRANCHED_CHAIN_AMINO_ACID_CATABOLISM		17	0.654099	1.67763	0.0392562	0.0793056	0.993	5746	tags=71%, list=31%, signal=102%
REACTOME_FORMATION_OF_INCISION_COMPLEX_IN_GG_NER	REACTOME_FORMATION_OF_INCISION_COMPLEX_IN_GG_NER		20	0.617219	1.67738	0.0148305	0.0792422	0.993	5258	tags=70%, list=28%, signal=97%
BIOCARTA_CELLCYCLE_PATHWAY	BIOCARTA_CELLCYCLE_PATHWAY		23	0.565906	1.67575	0.0320641	0.0801322	0.993	3170	tags=43%, list=17%, signal=52%
PID_P53_REGULATION_PATHWAY	PID_P53_REGULATION_PATHWAY		57	0.492117	1.67548	0.0323974	0.0801198	0.993	6127	tags=65%, list=33%, signal=96%
BENPORATH_MYC_TARGETS_WITH_EBOX	BENPORATH_MYC_TARGETS_WITH_EBOX		221	0.412617	1.67494	0.0184426	0.0801987	0.993	5143	tags=49%, list=27%, signal=67%
TOMIDA_METASTASIS_UP	TOMIDA_METASTASIS_UP		26	0.565668	1.67479	0.0240964	0.0800984	0.993	4269	tags=54%, list=23%, signal=70%
REACTOME_APC_C_CDC20_MEDIATED_DEGRADATION_OF_CYCLIN_B	REACTOME_APC_C_CDC20_MEDIATED_DEGRADATION_OF_CYCLIN_B		19	0.658857	1.67428	0.0191489	0.0802134	0.993	3441	tags=63%, list=18%, signal=77%
DAIRKEE_TERT_TARGETS_UP	DAIRKEE_TERT_TARGETS_UP		345	0.460165	1.67363	0.046	0.0803686	0.993	5195	tags=56%, list=28%, signal=76%
MMS_MOUSE_LYMPH_HIGH_4HRS_UP	MMS_MOUSE_LYMPH_HIGH_4HRS_UP		31	0.568654	1.67208	0.035865	0.0810263	0.993	3240	tags=52%, list=17%, signal=62%
PELLICCIOTTA_HDAC_IN_ANTIGEN_PRESENTATION_UP	PELLICCIOTTA_HDAC_IN_ANTIGEN_PRESENTATION_UP		62	0.540794	1.67152	0.0471092	0.0811601	0.993	6883	tags=71%, list=37%, signal=112%
MOHANKUMAR_HOXA1_TARGETS_UP	MOHANKUMAR_HOXA1_TARGETS_UP		384	0.414849	1.6695	0.0260304	0.0822368	0.993	4698	tags=46%, list=25%, signal=61%
REACTOME_MITOTIC_G2_G2_M_PHASES	REACTOME_MITOTIC_G2_G2_M_PHASES		77	0.491314	1.66889	0.04	0.0824209	0.994	5001	tags=57%, list=27%, signal=78%
PAL_PRMT5_TARGETS_UP	PAL_PRMT5_TARGETS_UP		195	0.451879	1.66885	0.0403397	0.0822541	0.994	3348	tags=49%, list=18%, signal=59%
MALONEY_RESPONSE_TO_17AAG_DN	MALONEY_RESPONSE_TO_17AAG_DN		76	0.567897	1.66855	0.0673684	0.0822449	0.994	4206	tags=66%, list=22%, signal=85%
PARK_HSC_AND_MULTIPOTENT_PROGENITORS	PARK_HSC_AND_MULTIPOTENT_PROGENITORS		49	0.470358	1.66738	0.0274841	0.0827398	0.994	2287	tags=37%, list=12%, signal=42%
MODY_HIPPOCAMPUS_PRENATAL	MODY_HIPPOCAMPUS_PRENATAL		42	0.583466	1.66679	0.0378947	0.0829286	0.994	6950	tags=79%, list=37%, signal=125%
REACTOME_GLUCONEOGENESIS	REACTOME_GLUCONEOGENESIS		30	0.557367	1.66575	0.0345528	0.08336	0.994	5250	tags=63%, list=28%, signal=88%
BRACHAT_RESPONSE_TO_CAMPTOTHECIN_DN	BRACHAT_RESPONSE_TO_CAMPTOTHECIN_DN		43	0.524586	1.66438	0.0390144	0.0840967	0.995	5339	tags=63%, list=29%, signal=88%
KEGG_GLYCOSYLPHOSPHATIDYLINOSITOL_GPI_ANCHOR_BIOSYNTHESIS	KEGG_GLYCOSYLPHOSPHATIDYLINOSITOL_GPI_ANCHOR_BIOSYNTHESIS		24	0.545403	1.6638	0.0262626	0.0842345	0.995	5605	tags=63%, list=30%, signal=89%
REACTOME_TCA_CYCLE_AND_RESPIRATORY_ELECTRON_TRANSPORT	REACTOME_TCA_CYCLE_AND_RESPIRATORY_ELECTRON_TRANSPORT		116	0.599348	1.66379	0.0608519	0.0840485	0.995	5406	tags=76%, list=29%, signal=106%
BROWNE_HCMV_INFECTION_14HR_UP	BROWNE_HCMV_INFECTION_14HR_UP		151	0.411822	1.66284	0.023913	0.0843966	0.996	4279	tags=44%, list=23%, signal=56%
REACTOME_ANTIGEN_PROCESSING_UBIQUITINATION_PROTEASOME_DEGRADATION	REACTOME_ANTIGEN_PROCESSING_UBIQUITINATION_PROTEASOME_DEGRADATION		195	0.420715	1.6625	0.0318471	0.0843984	0.996	6757	tags=64%, list=36%, signal=99%
ZHU_CMV_24_HR_UP	ZHU_CMV_24_HR_UP		93	0.476802	1.6601	0.0349076	0.0857016	0.998	3258	tags=41%, list=17%, signal=49%
REACTOME_RNA_POL_III_TRANSCRIPTION	REACTOME_RNA_POL_III_TRANSCRIPTION		33	0.538501	1.65822	0.0263736	0.0866889	0.998	5359	tags=67%, list=29%, signal=93%
BIOCARTA_CASPASE_PATHWAY	BIOCARTA_CASPASE_PATHWAY		23	0.617213	1.65819	0.0438247	0.0865184	0.998	5671	tags=78%, list=30%, signal=112%
SCHLOSSER_SERUM_RESPONSE_AUGMENTED_BY_MYC	SCHLOSSER_SERUM_RESPONSE_AUGMENTED_BY_MYC		101	0.46194	1.65783	0.0387755	0.0865408	0.998	6692	tags=67%, list=36%, signal=104%
MOOTHA_GLUCONEOGENESIS	MOOTHA_GLUCONEOGENESIS		31	0.532732	1.65758	0.033195	0.0865052	0.998	6400	tags=61%, list=34%, signal=93%
REACTOME_SIGNALING_BY_THE_B_CELL_RECEPTOR_BCR	REACTOME_SIGNALING_BY_THE_B_CELL_RECEPTOR_BCR		121	0.445785	1.65739	0.0329218	0.0863928	0.998	4368	tags=44%, list=23%, signal=57%
BIOCARTA_EIF_PATHWAY	BIOCARTA_EIF_PATHWAY		16	0.640608	1.65731	0.0338266	0.0862623	0.998	3510	tags=63%, list=19%, signal=77%
GOLUB_ALL_VS_AML_UP	GOLUB_ALL_VS_AML_UP		24	0.597479	1.65628	0.0168421	0.0867406	0.998	2269	tags=42%, list=12%, signal=47%
MOOTHA_PGC	MOOTHA_PGC		401	0.428471	1.65582	0.04158	0.0868311	0.998	4041	tags=46%, list=22%, signal=57%
REACTOME_CITRIC_ACID_CYCLE_TCA_CYCLE	REACTOME_CITRIC_ACID_CYCLE_TCA_CYCLE		19	0.695345	1.6556	0.0402414	0.0867811	0.998	5074	tags=89%, list=27%, signal=123%
SAKAI_TUMOR_INFILTRATING_MONOCYTES_DN	SAKAI_TUMOR_INFILTRATING_MONOCYTES_DN		79	0.492578	1.65533	0.0446809	0.0867593	0.998	4707	tags=54%, list=25%, signal=72%
SHEPARD_CRUSH_AND_BURN_MUTANT_UP	SHEPARD_CRUSH_AND_BURN_MUTANT_UP		186	0.41644	1.65514	0.0217865	0.0866851	0.998	3670	tags=43%, list=20%, signal=53%
WINTER_HYPOXIA_UP	WINTER_HYPOXIA_UP		88	0.507889	1.6546	0.0305677	0.0868476	0.998	3847	tags=48%, list=21%, signal=60%
BIOCARTA_PTDINS_PATHWAY	BIOCARTA_PTDINS_PATHWAY		23	0.547577	1.65459	0.0208333	0.0866673	0.998	3284	tags=43%, list=18%, signal=53%
PID_RB_1PATHWAY	PID_RB_1PATHWAY		65	0.439697	1.65417	0.0204082	0.0867456	0.998	4763	tags=45%, list=25%, signal=60%
REACTOME_CONVERSION_FROM_APC_C_CDC20_TO_APC_C_CDH1_IN_LATE_ANAPHASE	REACTOME_CONVERSION_FROM_APC_C_CDC20_TO_APC_C_CDH1_IN_LATE_ANAPHASE		16	0.648212	1.65178	0.0347826	0.0880013	0.998	3150	tags=56%, list=17%, signal=68%
PID_WNT_CANONICAL_PATHWAY	PID_WNT_CANONICAL_PATHWAY		20	0.559856	1.651	0.0317125	0.0882851	0.998	3284	tags=45%, list=18%, signal=55%
LI_AMPLIFIED_IN_LUNG_CANCER	LI_AMPLIFIED_IN_LUNG_CANCER		172	0.485153	1.65096	0.0469388	0.0881301	0.998	5318	tags=57%, list=28%, signal=79%
TONKS_TARGETS_OF_RUNX1_RUNX1T1_FUSION_MONOCYTE_UP	TONKS_TARGETS_OF_RUNX1_RUNX1T1_FUSION_MONOCYTE_UP		195	0.401905	1.64829	0.0251572	0.0895761	0.999	3481	tags=39%, list=19%, signal=48%
REACTOME_BIOSYNTHESIS_OF_THE_N_GLYCAN_PRECURSOR_DOLICHOL_LIPID_LINKED_OLIGOSACCHARIDE_LLO_AND_TRANSFER_TO_A_NASCENT_PROTEIN	REACTOME_BIOSYNTHESIS_OF_THE_N_GLYCAN_PRECURSOR_DOLICHOL_LIPID_LINKED_OLIGOSACCHARIDE_LLO_AND_TRANSFER_TO_A_NASCENT_PROTEIN		28	0.576117	1.64727	0.0329218	0.0900303	0.999	5830	tags=79%, list=31%, signal=114%
PID_FOXM1_PATHWAY	PID_FOXM1_PATHWAY		39	0.525581	1.64581	0.05074	0.0907714	0.999	4241	tags=62%, list=23%, signal=79%
TIEN_INTESTINE_PROBIOTICS_2HR_UP	TIEN_INTESTINE_PROBIOTICS_2HR_UP		27	0.569239	1.64515	0.0292276	0.0909988	0.999	5827	tags=70%, list=31%, signal=102%
WONG_ENDMETRIUM_CANCER_UP	WONG_ENDMETRIUM_CANCER_UP		25	0.509463	1.64439	0.0262097	0.091311	0.999	5437	tags=44%, list=29%, signal=62%
FLECHNER_PBL_KIDNEY_TRANSPLANT_REJECTED_VS_OK_DN	FLECHNER_PBL_KIDNEY_TRANSPLANT_REJECTED_VS_OK_DN		50	0.471724	1.64227	0.0208333	0.0924938	0.999	5277	tags=58%, list=28%, signal=81%
NAGY_TFTC_COMPONENTS_HUMAN	NAGY_TFTC_COMPONENTS_HUMAN		18	0.586381	1.64156	0.0212766	0.092745	0.999	6143	tags=72%, list=33%, signal=107%
ZHONG_RESPONSE_TO_AZACITIDINE_AND_TSA_DN	ZHONG_RESPONSE_TO_AZACITIDINE_AND_TSA_DN		63	0.489186	1.64074	0.0344828	0.093091	0.999	4425	tags=51%, list=24%, signal=66%
REACTOME_SYNTHESIS_OF_GLYCOSYLPHOSPHATIDYLINOSITOL_GPI	REACTOME_SYNTHESIS_OF_GLYCOSYLPHOSPHATIDYLINOSITOL_GPI		17	0.591412	1.64068	0.0226804	0.092943	0.999	4550	tags=59%, list=24%, signal=78%
CHNG_MULTIPLE_MYELOMA_HYPERPLOID_DN	CHNG_MULTIPLE_MYELOMA_HYPERPLOID_DN		28	0.539806	1.63952	0.0426829	0.0934238	0.999	6107	tags=57%, list=33%, signal=85%
SEIDEN_MET_SIGNALING	SEIDEN_MET_SIGNALING		18	0.622396	1.63837	0.0522088	0.0939236	0.999	5258	tags=72%, list=28%, signal=100%
LI_CYTIDINE_ANALOG_PATHWAY	LI_CYTIDINE_ANALOG_PATHWAY		16	0.567367	1.63634	0.0294737	0.0950209	0.999	2164	tags=38%, list=12%, signal=42%
WANG_TUMOR_INVASIVENESS_UP	WANG_TUMOR_INVASIVENESS_UP		362	0.409899	1.63516	0.0359408	0.0956102	0.999	5101	tags=54%, list=27%, signal=73%
BURTON_ADIPOGENESIS_4	BURTON_ADIPOGENESIS_4		44	0.491293	1.634	0.0246914	0.0961483	0.999	2500	tags=48%, list=13%, signal=55%
PROVENZANI_METASTASIS_UP	PROVENZANI_METASTASIS_UP		183	0.417316	1.63379	0.0288066	0.0960913	0.999	2643	tags=37%, list=14%, signal=42%
HEDENFALK_BREAST_CANCER_HEREDITARY_VS_SPORADIC	HEDENFALK_BREAST_CANCER_HEREDITARY_VS_SPORADIC		46	0.491634	1.63306	0.0333333	0.0963808	0.999	3210	tags=43%, list=17%, signal=52%
REACTOME_PURINE_METABOLISM	REACTOME_PURINE_METABOLISM		33	0.529789	1.63298	0.0465116	0.0962185	0.999	4695	tags=58%, list=25%, signal=77%
PRAMOONJAGO_SOX4_TARGETS_DN	PRAMOONJAGO_SOX4_TARGETS_DN		50	0.530938	1.63253	0.0385396	0.0962776	0.999	5035	tags=62%, list=27%, signal=85%
YAO_TEMPORAL_RESPONSE_TO_PROGESTERONE_CLUSTER_7	YAO_TEMPORAL_RESPONSE_TO_PROGESTERONE_CLUSTER_7		72	0.448913	1.6319	0.0361702	0.0964656	0.999	4872	tags=54%, list=26%, signal=73%
SA_CASPASE_CASCADE	SA_CASPASE_CASCADE		19	0.608315	1.63157	0.0388548	0.0964783	0.999	4022	tags=58%, list=21%, signal=74%
JIANG_VHL_TARGETS	JIANG_VHL_TARGETS		130	0.420583	1.62946	0.0294118	0.0976371	0.999	3728	tags=42%, list=20%, signal=52%
REACTOME_ASSOCIATION_OF_TRIC_CCT_WITH_TARGET_PROTEINS_DURING_BIOSYNTHESIS	REACTOME_ASSOCIATION_OF_TRIC_CCT_WITH_TARGET_PROTEINS_DURING_BIOSYNTHESIS		26	0.52698	1.62772	0.0496894	0.0986493	0.999	4753	tags=54%, list=25%, signal=72%
AGUIRRE_PANCREATIC_CANCER_COPY_NUMBER_DN	AGUIRRE_PANCREATIC_CANCER_COPY_NUMBER_DN		222	0.417183	1.625	0.026087	0.100306	0.999	5632	tags=53%, list=30%, signal=75%
REACTOME_CROSS_PRESENTATION_OF_SOLUBLE_EXOGENOUS_ANTIGENS_ENDOSOMES	REACTOME_CROSS_PRESENTATION_OF_SOLUBLE_EXOGENOUS_ANTIGENS_ENDOSOMES		47	0.598383	1.62406	0.068323	0.100679	0.999	4342	tags=77%, list=23%, signal=99%
APPIERTO_RESPONSE_TO_FENRETINIDE_DN	APPIERTO_RESPONSE_TO_FENRETINIDE_DN		50	0.478999	1.6236	0.0512295	0.100771	0.999	3984	tags=54%, list=21%, signal=68%
ENK_UV_RESPONSE_EPIDERMIS_UP	ENK_UV_RESPONSE_EPIDERMIS_UP		277	0.40175	1.62334	0.0230608	0.100736	0.999	4802	tags=48%, list=26%, signal=63%
ROYLANCE_BREAST_CANCER_16Q_COPY_NUMBER_UP	ROYLANCE_BREAST_CANCER_16Q_COPY_NUMBER_UP		53	0.49117	1.62147	0.0567951	0.101845	0.999	4091	tags=40%, list=22%, signal=51%
RAMALHO_STEMNESS_UP	RAMALHO_STEMNESS_UP		196	0.443288	1.61973	0.0702128	0.102809	0.999	5316	tags=55%, list=28%, signal=75%
KEGG_HUNTINGTONS_DISEASE	KEGG_HUNTINGTONS_DISEASE		172	0.470896	1.61857	0.060166	0.103408	0.999	5445	tags=57%, list=29%, signal=80%
LIN_APC_TARGETS	LIN_APC_TARGETS		75	0.496855	1.61826	0.0583333	0.103407	0.999	5026	tags=57%, list=27%, signal=78%
NIKOLSKY_BREAST_CANCER_16Q24_AMPLICON	NIKOLSKY_BREAST_CANCER_16Q24_AMPLICON		47	0.572464	1.61826	0.0742268	0.103198	0.999	4960	tags=57%, list=27%, signal=78%
WANG_TARGETS_OF_MLL_CBP_FUSION_DN	WANG_TARGETS_OF_MLL_CBP_FUSION_DN		42	0.4953	1.61607	0.0439331	0.104545	0.999	2416	tags=43%, list=13%, signal=49%
REACTOME_MEIOTIC_RECOMBINATION	REACTOME_MEIOTIC_RECOMBINATION		80	0.538307	1.61521	0.0696721	0.104974	0.999	5884	tags=61%, list=31%, signal=89%
HEIDENBLAD_AMPLICON_12P11_12_DN	HEIDENBLAD_AMPLICON_12P11_12_DN		22	0.53563	1.61518	0.042	0.104783	0.999	5930	tags=59%, list=32%, signal=86%
ANDERSEN_LIVER_CANCER_KRT19_UP	ANDERSEN_LIVER_CANCER_KRT19_UP		34	0.590095	1.6139	0.0536082	0.105482	0.999	5731	tags=76%, list=31%, signal=110%
BYSTRYKH_HEMATOPOIESIS_STEM_CELL_AND_BRAIN_QTL_CIS	BYSTRYKH_HEMATOPOIESIS_STEM_CELL_AND_BRAIN_QTL_CIS		57	0.468513	1.6135	0.0345572	0.105567	0.999	6612	tags=63%, list=35%, signal=97%
SANSOM_APC_TARGETS_UP	SANSOM_APC_TARGETS_UP		115	0.411342	1.61346	0.0292276	0.105371	0.999	4445	tags=44%, list=24%, signal=58%
KEGG_VALINE_LEUCINE_AND_ISOLEUCINE_DEGRADATION	KEGG_VALINE_LEUCINE_AND_ISOLEUCINE_DEGRADATION		44	0.530918	1.61324	0.0562249	0.105297	0.999	6180	tags=64%, list=33%, signal=95%
MELLMAN_TUT1_TARGETS_UP	MELLMAN_TUT1_TARGETS_UP		18	0.541246	1.61295	0.0257511	0.105291	0.999	4283	tags=44%, list=23%, signal=58%
ALCALAY_AML_BY_NPM1_LOCALIZATION_DN	ALCALAY_AML_BY_NPM1_LOCALIZATION_DN		181	0.393496	1.61233	0.0313725	0.105512	0.999	1870	tags=29%, list=10%, signal=32%
REACTOME_MEIOSIS	REACTOME_MEIOSIS		108	0.476606	1.61228	0.060166	0.105343	0.999	5884	tags=57%, list=31%, signal=83%
YAMASHITA_LIVER_CANCER_WITH_EPCAM_UP	YAMASHITA_LIVER_CANCER_WITH_EPCAM_UP		52	0.552342	1.61171	0.059322	0.105545	0.999	5646	tags=69%, list=30%, signal=99%
AUNG_GASTRIC_CANCER	AUNG_GASTRIC_CANCER		53	0.426727	1.61016	0.0204082	0.106478	0.999	6133	tags=57%, list=33%, signal=84%
REACTOME_ACTIVATION_OF_THE_MRNA_UPON_BINDING_OF_THE_CAP_BINDING_COMPLEX_AND_EIFS_AND_SUBSEQUENT_BINDING_TO_43S	REACTOME_ACTIVATION_OF_THE_MRNA_UPON_BINDING_OF_THE_CAP_BINDING_COMPLEX_AND_EIFS_AND_SUBSEQUENT_BINDING_TO_43S		56	0.629229	1.60996	0.0858283	0.106412	0.999	6599	tags=91%, list=35%, signal=140%
GOLDRATH_HOMEOSTATIC_PROLIFERATION	GOLDRATH_HOMEOSTATIC_PROLIFERATION		163	0.427466	1.60954	0.0321888	0.106475	0.999	5500	tags=58%, list=29%, signal=82%
LANDIS_ERBB2_BREAST_PRENEOPLASTIC_UP	LANDIS_ERBB2_BREAST_PRENEOPLASTIC_UP		17	0.557307	1.60924	0.0329218	0.106469	0.999	5626	tags=59%, list=30%, signal=84%
CHANDRAN_METASTASIS_TOP50_UP	CHANDRAN_METASTASIS_TOP50_UP		34	0.521975	1.60751	0.0518359	0.107563	0.999	6130	tags=74%, list=33%, signal=109%
KEGG_PANTOTHENATE_AND_COA_BIOSYNTHESIS	KEGG_PANTOTHENATE_AND_COA_BIOSYNTHESIS		16	0.536355	1.60738	0.0211416	0.10745	0.999	4281	tags=50%, list=23%, signal=65%
CHIARADONNA_NEOPLASTIC_TRANSFORMATION_KRAS_UP	CHIARADONNA_NEOPLASTIC_TRANSFORMATION_KRAS_UP		121	0.41701	1.60714	0.0364026	0.107437	0.999	3022	tags=39%, list=16%, signal=46%
KIM_MYCL1_AMPLIFICATION_TARGETS_DN	KIM_MYCL1_AMPLIFICATION_TARGETS_DN		19	0.538836	1.60656	0.0386266	0.107613	0.999	5765	tags=58%, list=31%, signal=84%
NGO_MALIGNANT_GLIOMA_1P_LOH	NGO_MALIGNANT_GLIOMA_1P_LOH		15	0.689414	1.60574	0.038055	0.107964	0.999	3671	tags=87%, list=20%, signal=108%
ELVIDGE_HIF1A_AND_HIF2A_TARGETS_UP	ELVIDGE_HIF1A_AND_HIF2A_TARGETS_UP		38	0.48744	1.60532	0.0481172	0.10808	0.999	5400	tags=71%, list=29%, signal=100%
SWEET_KRAS_TARGETS_DN	SWEET_KRAS_TARGETS_DN		62	0.42709	1.60463	0.0272537	0.108352	0.999	3463	tags=35%, list=19%, signal=43%
KEGG_UBIQUITIN_MEDIATED_PROTEOLYSIS	KEGG_UBIQUITIN_MEDIATED_PROTEOLYSIS		130	0.427608	1.60382	0.0326797	0.108694	0.999	6757	tags=58%, list=36%, signal=91%
CAFFAREL_RESPONSE_TO_THC_24HR_5_DN	CAFFAREL_RESPONSE_TO_THC_24HR_5_DN		55	0.4936	1.60332	0.0494845	0.108863	0.999	4540	tags=58%, list=24%, signal=77%
REACTOME_SULFUR_AMINO_ACID_METABOLISM	REACTOME_SULFUR_AMINO_ACID_METABOLISM		23	0.520818	1.60327	0.0466102	0.108699	0.999	3233	tags=48%, list=17%, signal=58%
CAIRO_PML_TARGETS_BOUND_BY_MYC_UP	CAIRO_PML_TARGETS_BOUND_BY_MYC_UP		23	0.592713	1.60196	0.0527426	0.109406	0.999	3014	tags=57%, list=16%, signal=67%
REACTOME_HOMOLOGOUS_RECOMBINATION_REPAIR_OF_REPLICATION_INDEPENDENT_DOUBLE_STRAND_BREAKS	REACTOME_HOMOLOGOUS_RECOMBINATION_REPAIR_OF_REPLICATION_INDEPENDENT_DOUBLE_STRAND_BREAKS		15	0.645739	1.60138	0.0411523	0.109595	0.999	3562	tags=67%, list=19%, signal=82%
CHAUHAN_RESPONSE_TO_METHOXYESTRADIOL_UP	CHAUHAN_RESPONSE_TO_METHOXYESTRADIOL_UP		50	0.493038	1.60103	0.0748441	0.109627	0.999	2975	tags=52%, list=16%, signal=62%
HOFMANN_MYELODYSPLASTIC_SYNDROM_LOW_RISK_DN	HOFMANN_MYELODYSPLASTIC_SYNDROM_LOW_RISK_DN		30	0.533661	1.60081	0.0580913	0.10957	0.999	2666	tags=43%, list=14%, signal=50%
AIYAR_COBRA1_TARGETS_DN	AIYAR_COBRA1_TARGETS_DN		28	0.499302	1.60042	0.0461538	0.109621	0.999	3366	tags=46%, list=18%, signal=57%
LIU_COMMON_CANCER_GENES	LIU_COMMON_CANCER_GENES		67	0.42047	1.59977	0.0206612	0.109817	0.999	5911	tags=49%, list=32%, signal=72%
REACTOME_CHOLESTEROL_BIOSYNTHESIS	REACTOME_CHOLESTEROL_BIOSYNTHESIS		21	0.6503	1.5995	0.0649351	0.109793	0.999	4274	tags=71%, list=23%, signal=92%
TONG_INTERACT_WITH_PTTG1	TONG_INTERACT_WITH_PTTG1		53	0.451179	1.59929	0.0376569	0.109742	0.999	6930	tags=72%, list=37%, signal=114%
BOGNI_TREATMENT_RELATED_MYELOID_LEUKEMIA_DN	BOGNI_TREATMENT_RELATED_MYELOID_LEUKEMIA_DN		31	0.481074	1.59812	0.039916	0.110375	0.999	4045	tags=39%, list=22%, signal=49%
REACTOME_ENDOSOMAL_SORTING_COMPLEX_REQUIRED_FOR_TRANSPORT_ESCRT	REACTOME_ENDOSOMAL_SORTING_COMPLEX_REQUIRED_FOR_TRANSPORT_ESCRT		26	0.562435	1.59792	0.0473251	0.110291	0.999	6717	tags=77%, list=36%, signal=120%
KEGG_PYRUVATE_METABOLISM	KEGG_PYRUVATE_METABOLISM		38	0.485464	1.59644	0.0546218	0.1112	0.999	5453	tags=55%, list=29%, signal=78%
BRUINS_UVC_RESPONSE_MIDDLE	BRUINS_UVC_RESPONSE_MIDDLE		86	0.39516	1.59593	0.0316456	0.111349	0.999	4650	tags=48%, list=25%, signal=63%
REACTOME_PYRUVATE_METABOLISM	REACTOME_PYRUVATE_METABOLISM		18	0.570756	1.5959	0.0479167	0.111163	0.999	4823	tags=61%, list=26%, signal=82%
PID_ATM_PATHWAY	PID_ATM_PATHWAY		33	0.537138	1.59516	0.0443975	0.111427	0.999	4807	tags=61%, list=26%, signal=81%
ALCALA_APOPTOSIS	ALCALA_APOPTOSIS		85	0.471938	1.59431	0.0466531	0.111813	0.999	5110	tags=58%, list=27%, signal=79%
DORN_ADENOVIRUS_INFECTION_12HR_DN	DORN_ADENOVIRUS_INFECTION_12HR_DN		33	0.489852	1.59342	0.0443975	0.112299	0.999	4241	tags=45%, list=23%, signal=59%
WANG_RECURRENT_LIVER_CANCER_UP	WANG_RECURRENT_LIVER_CANCER_UP		20	0.562819	1.59321	0.0460251	0.112225	0.999	5423	tags=50%, list=29%, signal=70%
HORTON_SREBF_TARGETS	HORTON_SREBF_TARGETS		24	0.615115	1.59266	0.0895197	0.1124	0.999	5046	tags=75%, list=27%, signal=103%
RICKMAN_TUMOR_DIFFERENTIATED_WELL_VS_POORLY_UP	RICKMAN_TUMOR_DIFFERENTIATED_WELL_VS_POORLY_UP		219	0.405076	1.59196	0.0454545	0.112652	0.999	4759	tags=45%, list=25%, signal=60%
RIZ_ERYTHROID_DIFFERENTIATION_CCNE1	RIZ_ERYTHROID_DIFFERENTIATION_CCNE1		39	0.460467	1.59185	0.038055	0.11252	0.999	4741	tags=51%, list=25%, signal=69%
SINGH_NFE2L2_TARGETS	SINGH_NFE2L2_TARGETS		15	0.645507	1.58912	0.0575693	0.114256	0.999	4680	tags=67%, list=25%, signal=89%
KEGG_LYSINE_DEGRADATION	KEGG_LYSINE_DEGRADATION		39	0.486336	1.58898	0.0505263	0.114127	0.999	5396	tags=62%, list=29%, signal=86%
BIOCARTA_DEATH_PATHWAY	BIOCARTA_DEATH_PATHWAY		33	0.501423	1.58877	0.0494071	0.114089	0.999	2487	tags=45%, list=13%, signal=52%
REACTOME_DESTABILIZATION_OF_MRNA_BY_TRISTETRAPROLIN_TTP	REACTOME_DESTABILIZATION_OF_MRNA_BY_TRISTETRAPROLIN_TTP		17	0.576003	1.5854	0.044586	0.116257	0.999	5530	tags=71%, list=30%, signal=100%
KOINUMA_COLON_CANCER_MSI_UP	KOINUMA_COLON_CANCER_MSI_UP		16	0.626993	1.58192	0.057377	0.118644	0.999	3845	tags=50%, list=21%, signal=63%
REACTOME_INTRINSIC_PATHWAY_FOR_APOPTOSIS	REACTOME_INTRINSIC_PATHWAY_FOR_APOPTOSIS		29	0.522679	1.58102	0.0473251	0.119125	0.999	5979	tags=72%, list=32%, signal=106%
PID_MYC_PATHWAY	PID_MYC_PATHWAY		25	0.513209	1.579	0.0394191	0.120331	0.999	8272	tags=92%, list=44%, signal=165%
IWANAGA_E2F1_TARGETS_INDUCED_BY_SERUM	IWANAGA_E2F1_TARGETS_INDUCED_BY_SERUM		29	0.557479	1.57737	0.0506329	0.121285	0.999	3361	tags=48%, list=18%, signal=59%
ZHAN_VARIABLE_EARLY_DIFFERENTIATION_GENES_DN	ZHAN_VARIABLE_EARLY_DIFFERENTIATION_GENES_DN		30	0.508242	1.57677	0.0509554	0.121457	0.999	2465	tags=40%, list=13%, signal=46%
TIEN_INTESTINE_PROBIOTICS_6HR_UP	TIEN_INTESTINE_PROBIOTICS_6HR_UP		55	0.53951	1.57616	0.108268	0.121725	0.999	6378	tags=75%, list=34%, signal=113%
COLLIS_PRKDC_SUBSTRATES	COLLIS_PRKDC_SUBSTRATES		19	0.553677	1.5761	0.0657084	0.121553	0.999	4372	tags=63%, list=23%, signal=82%
HU_GENOTOXIN_ACTION_DIRECT_VS_INDIRECT_24HR	HU_GENOTOXIN_ACTION_DIRECT_VS_INDIRECT_24HR		51	0.456192	1.57569	0.0421053	0.121672	0.999	5417	tags=57%, list=29%, signal=80%
HEDENFALK_BREAST_CANCER_BRCA1_VS_BRCA2	HEDENFALK_BREAST_CANCER_BRCA1_VS_BRCA2		156	0.407085	1.57364	0.0641593	0.123027	0.999	5894	tags=56%, list=32%, signal=82%
TIEN_INTESTINE_PROBIOTICS_24HR_DN	TIEN_INTESTINE_PROBIOTICS_24HR_DN		210	0.43704	1.57204	0.055794	0.124077	0.999	6950	tags=63%, list=37%, signal=99%
WEST_ADRENOCORTICAL_CARCINOMA_VS_ADENOMA_UP	WEST_ADRENOCORTICAL_CARCINOMA_VS_ADENOMA_UP		18	0.55507	1.57199	0.0313808	0.123881	0.999	2077	tags=50%, list=11%, signal=56%
REACTOME_TRANSLATION	REACTOME_TRANSLATION		144	0.577991	1.56976	0.0989899	0.125396	0.999	7017	tags=85%, list=38%, signal=136%
PID_EPHA2_FWD_PATHWAY	PID_EPHA2_FWD_PATHWAY		19	0.539958	1.56957	0.0618337	0.125327	0.999	3540	tags=47%, list=19%, signal=58%
SESTO_RESPONSE_TO_UV_C3	SESTO_RESPONSE_TO_UV_C3		19	0.570917	1.56741	0.056962	0.126795	0.999	1547	tags=37%, list=8%, signal=40%
KEGG_N_GLYCAN_BIOSYNTHESIS	KEGG_N_GLYCAN_BIOSYNTHESIS		46	0.491765	1.56625	0.0589431	0.127509	0.999	4008	tags=52%, list=21%, signal=66%
WEIGEL_OXIDATIVE_STRESS_BY_HNE_AND_TBH	WEIGEL_OXIDATIVE_STRESS_BY_HNE_AND_TBH		56	0.414108	1.56609	0.0390144	0.1274	0.999	2494	tags=34%, list=13%, signal=39%
XU_HGF_TARGETS_INDUCED_BY_AKT1_48HR_DN	XU_HGF_TARGETS_INDUCED_BY_AKT1_48HR_DN		25	0.552235	1.56593	0.0739958	0.12728	0.999	3599	tags=52%, list=19%, signal=64%
AGUIRRE_PANCREATIC_CANCER_COPY_NUMBER_UP	AGUIRRE_PANCREATIC_CANCER_COPY_NUMBER_UP		272	0.382295	1.56353	0.0408998	0.128821	0.999	5222	tags=49%, list=28%, signal=66%
GAZDA_DIAMOND_BLACKFAN_ANEMIA_ERYTHROID_UP	GAZDA_DIAMOND_BLACKFAN_ANEMIA_ERYTHROID_UP		24	0.494859	1.56301	0.0377359	0.129009	0.999	3351	tags=50%, list=18%, signal=61%
JOHANSSON_GLIOMAGENESIS_BY_PDGFB_UP	JOHANSSON_GLIOMAGENESIS_BY_PDGFB_UP		57	0.435965	1.56189	0.0453608	0.129627	0.999	2287	tags=33%, list=12%, signal=38%
WEST_ADRENOCORTICAL_TUMOR_MARKERS_UP	WEST_ADRENOCORTICAL_TUMOR_MARKERS_UP		21	0.586626	1.56113	0.0647948	0.129995	0.999	4274	tags=67%, list=23%, signal=86%
JAZAERI_BREAST_CANCER_BRCA1_VS_BRCA2_UP	JAZAERI_BREAST_CANCER_BRCA1_VS_BRCA2_UP		47	0.48323	1.55991	0.0466102	0.130733	0.999	6193	tags=62%, list=33%, signal=92%
BARRIER_CANCER_RELAPSE_NORMAL_SAMPLE_DN	BARRIER_CANCER_RELAPSE_NORMAL_SAMPLE_DN		28	0.532417	1.55937	0.0648536	0.130945	0.999	3664	tags=54%, list=20%, signal=67%
FLECHNER_PBL_KIDNEY_TRANSPLANT_REJECTED_VS_OK_UP	FLECHNER_PBL_KIDNEY_TRANSPLANT_REJECTED_VS_OK_UP		62	0.421087	1.55889	0.0385439	0.131113	0.999	4227	tags=45%, list=23%, signal=58%
LINDGREN_BLADDER_CANCER_CLUSTER_1_DN	LINDGREN_BLADDER_CANCER_CLUSTER_1_DN		356	0.35546	1.55768	0.0457256	0.131815	0.999	2512	tags=34%, list=13%, signal=39%
CHARAFE_BREAST_CANCER_BASAL_VS_MESENCHYMAL_UP	CHARAFE_BREAST_CANCER_BASAL_VS_MESENCHYMAL_UP		111	0.483	1.5576	0.0993658	0.131644	0.999	4763	tags=52%, list=25%, signal=70%
REACTOME_PYRIMIDINE_METABOLISM	REACTOME_PYRIMIDINE_METABOLISM		23	0.518041	1.55516	0.044586	0.133379	0.999	2164	tags=35%, list=12%, signal=39%
REACTOME_RNA_POL_I_TRANSCRIPTION	REACTOME_RNA_POL_I_TRANSCRIPTION		81	0.516058	1.55501	0.103158	0.133259	0.999	6486	tags=65%, list=35%, signal=100%
PID_P73PATHWAY	PID_P73PATHWAY		76	0.402616	1.55299	0.0432099	0.134638	1	4954	tags=39%, list=26%, signal=53%
FERRANDO_HOX11_NEIGHBORS	FERRANDO_HOX11_NEIGHBORS		23	0.535221	1.55284	0.0669371	0.134525	1	2900	tags=48%, list=16%, signal=57%
GAJATE_RESPONSE_TO_TRABECTEDIN_DN	GAJATE_RESPONSE_TO_TRABECTEDIN_DN		18	0.564434	1.55256	0.0487288	0.134529	1	2581	tags=50%, list=14%, signal=58%
BARIS_THYROID_CANCER_UP	BARIS_THYROID_CANCER_UP		23	0.529923	1.55172	0.0617021	0.134951	1	4980	tags=65%, list=27%, signal=89%
GENTLES_LEUKEMIC_STEM_CELL_DN	GENTLES_LEUKEMIC_STEM_CELL_DN		18	0.580768	1.55147	0.0324544	0.134967	1	619	tags=28%, list=3%, signal=29%
LANDIS_ERBB2_BREAST_TUMORS_324_UP	LANDIS_ERBB2_BREAST_TUMORS_324_UP		139	0.392798	1.5508	0.0494845	0.135242	1	6370	tags=55%, list=34%, signal=82%
REACTOME_CLASS_I_MHC_MEDIATED_ANTIGEN_PROCESSING_PRESENTATION	REACTOME_CLASS_I_MHC_MEDIATED_ANTIGEN_PROCESSING_PRESENTATION		232	0.386076	1.55072	0.065678	0.135068	1	5053	tags=49%, list=27%, signal=66%
DEN_INTERACT_WITH_LCA5	DEN_INTERACT_WITH_LCA5		25	0.55653	1.54983	0.0940695	0.135536	1	5240	tags=64%, list=28%, signal=89%
CHOW_RASSF1_TARGETS_DN	CHOW_RASSF1_TARGETS_DN		29	0.512212	1.54971	0.079918	0.135375	1	5911	tags=59%, list=32%, signal=86%
FERNANDEZ_BOUND_BY_MYC	FERNANDEZ_BOUND_BY_MYC		179	0.363881	1.54801	0.0306122	0.136593	1	5088	tags=45%, list=27%, signal=61%
DITTMER_PTHLH_TARGETS_UP	DITTMER_PTHLH_TARGETS_UP		110	0.398507	1.54691	0.0490405	0.137219	1	5353	tags=50%, list=29%, signal=70%
SESTO_RESPONSE_TO_UV_C0	SESTO_RESPONSE_TO_UV_C0		105	0.448016	1.54606	0.0611354	0.137655	1	5612	tags=56%, list=30%, signal=80%
CREIGHTON_AKT1_SIGNALING_VIA_MTOR_DN	CREIGHTON_AKT1_SIGNALING_VIA_MTOR_DN		23	0.624315	1.54574	0.0748441	0.137683	1	5723	tags=78%, list=31%, signal=113%
CUI_GLUCOSE_DEPRIVATION	CUI_GLUCOSE_DEPRIVATION		59	0.442886	1.54564	0.0407725	0.137538	1	5531	tags=53%, list=30%, signal=74%
GARGALOVIC_RESPONSE_TO_OXIDIZED_PHOSPHOLIPIDS_RED_UP	GARGALOVIC_RESPONSE_TO_OXIDIZED_PHOSPHOLIPIDS_RED_UP		16	0.591005	1.54516	0.0650759	0.137731	1	5194	tags=75%, list=28%, signal=104%
WATANABE_COLON_CANCER_MSI_VS_MSS_UP	WATANABE_COLON_CANCER_MSI_VS_MSS_UP		27	0.509717	1.54289	0.062635	0.139331	1	4867	tags=52%, list=26%, signal=70%
MULLIGAN_NTF3_SIGNALING_VIA_INSR_AND_IGF1R_UP	MULLIGAN_NTF3_SIGNALING_VIA_INSR_AND_IGF1R_UP		23	0.528169	1.54154	0.0534188	0.140258	1	2870	tags=57%, list=15%, signal=67%
REACTOME_RNA_POL_I_TRANSCRIPTION_TERMINATION	REACTOME_RNA_POL_I_TRANSCRIPTION_TERMINATION		19	0.592391	1.54034	0.0718954	0.141005	1	6486	tags=84%, list=35%, signal=129%
OLSSON_E2F3_TARGETS_DN	OLSSON_E2F3_TARGETS_DN		46	0.442488	1.53912	0.0668058	0.14174	1	4018	tags=46%, list=21%, signal=58%
KEGG_P53_SIGNALING_PATHWAY	KEGG_P53_SIGNALING_PATHWAY		66	0.401338	1.53841	0.0547368	0.142085	1	2813	tags=33%, list=15%, signal=39%
DING_LUNG_CANCER_EXPRESSION_BY_COPY_NUMBER	DING_LUNG_CANCER_EXPRESSION_BY_COPY_NUMBER		96	0.456499	1.53835	0.0926724	0.1419	1	6632	tags=57%, list=35%, signal=88%
BIOCARTA_WNT_PATHWAY	BIOCARTA_WNT_PATHWAY		26	0.512304	1.53817	0.0625	0.141793	1	4722	tags=54%, list=25%, signal=72%
HOLLEMAN_ASPARAGINASE_RESISTANCE_ALL_DN	HOLLEMAN_ASPARAGINASE_RESISTANCE_ALL_DN		22	0.552517	1.53756	0.0677618	0.142071	1	4954	tags=55%, list=26%, signal=74%
STEIN_ESR1_TARGETS	STEIN_ESR1_TARGETS		82	0.389191	1.53592	0.0497925	0.143229	1	1750	tags=27%, list=9%, signal=29%
TAKAO_RESPONSE_TO_UVB_RADIATION_DN	TAKAO_RESPONSE_TO_UVB_RADIATION_DN		95	0.419084	1.53581	0.0463576	0.143066	1	3555	tags=39%, list=19%, signal=48%
COLDREN_GEFITINIB_RESISTANCE_DN	COLDREN_GEFITINIB_RESISTANCE_DN		212	0.443358	1.53573	0.107595	0.142889	1	5809	tags=58%, list=31%, signal=83%
PUIFFE_INVASION_INHIBITED_BY_ASCITES_UP	PUIFFE_INVASION_INHIBITED_BY_ASCITES_UP		81	0.419957	1.53415	0.0703625	0.143926	1	3435	tags=41%, list=18%, signal=50%
DACOSTA_UV_RESPONSE_VIA_ERCC3_UP	DACOSTA_UV_RESPONSE_VIA_ERCC3_UP		296	0.390879	1.53213	0.0689655	0.145332	1	4291	tags=44%, list=23%, signal=57%
PID_CASPASE_PATHWAY	PID_CASPASE_PATHWAY		51	0.433666	1.53081	0.0793651	0.146213	1	2487	tags=37%, list=13%, signal=43%
LASTOWSKA_NEUROBLASTOMA_COPY_NUMBER_UP	LASTOWSKA_NEUROBLASTOMA_COPY_NUMBER_UP		165	0.410101	1.52908	0.0895833	0.147473	1	5120	tags=49%, list=27%, signal=67%
JIANG_HYPOXIA_CANCER	JIANG_HYPOXIA_CANCER		76	0.407464	1.52842	0.063655	0.147778	1	4530	tags=45%, list=24%, signal=59%
CHUNG_BLISTER_CYTOTOXICITY_UP	CHUNG_BLISTER_CYTOTOXICITY_UP		123	0.41949	1.52806	0.0697211	0.147826	1	4867	tags=45%, list=26%, signal=60%
KIM_WT1_TARGETS_12HR_DN	KIM_WT1_TARGETS_12HR_DN		200	0.368736	1.52605	0.0467091	0.149299	1	2643	tags=33%, list=14%, signal=38%
REACTOME_APOPTOTIC_EXECUTION_PHASE	REACTOME_APOPTOTIC_EXECUTION_PHASE		50	0.43548	1.52531	0.0618557	0.149686	1	4938	tags=54%, list=26%, signal=73%
CHANDRAN_METASTASIS_UP	CHANDRAN_METASTASIS_UP		191	0.368718	1.52455	0.0428266	0.150048	1	5205	tags=48%, list=28%, signal=65%
BYSTRYKH_HEMATOPOIESIS_STEM_CELL_AND_BRAIN_QTL_TRANS	BYSTRYKH_HEMATOPOIESIS_STEM_CELL_AND_BRAIN_QTL_TRANS		177	0.341419	1.52292	0.0193966	0.151197	1	5121	tags=44%, list=27%, signal=60%
STEIN_ESRRA_TARGETS_RESPONSIVE_TO_ESTROGEN_UP	STEIN_ESRRA_TARGETS_RESPONSIVE_TO_ESTROGEN_UP		29	0.473484	1.5214	0.0747863	0.152266	1	3294	tags=41%, list=18%, signal=50%
REACTOME_RECRUITMENT_OF_MITOTIC_CENTROSOME_PROTEINS_AND_COMPLEXES	REACTOME_RECRUITMENT_OF_MITOTIC_CENTROSOME_PROTEINS_AND_COMPLEXES		62	0.435418	1.52134	0.0799136	0.152051	1	5001	tags=52%, list=27%, signal=70%
REACTOME_SMAD2_SMAD3_SMAD4_HETEROTRIMER_REGULATES_TRANSCRIPTION	REACTOME_SMAD2_SMAD3_SMAD4_HETEROTRIMER_REGULATES_TRANSCRIPTION		25	0.489755	1.52111	0.0811966	0.152022	1	5254	tags=56%, list=28%, signal=78%
VANHARANTA_UTERINE_FIBROID_WITH_7Q_DELETION_UP	VANHARANTA_UTERINE_FIBROID_WITH_7Q_DELETION_UP		65	0.432972	1.52104	0.0649351	0.151845	1	4096	tags=51%, list=22%, signal=65%
HOLLEMAN_PREDNISOLONE_RESISTANCE_ALL_UP	HOLLEMAN_PREDNISOLONE_RESISTANCE_ALL_UP		19	0.55026	1.52098	0.084	0.151642	1	4884	tags=63%, list=26%, signal=85%
YAO_TEMPORAL_RESPONSE_TO_PROGESTERONE_CLUSTER_13	YAO_TEMPORAL_RESPONSE_TO_PROGESTERONE_CLUSTER_13		164	0.501836	1.5208	0.113131	0.15154	1	6074	tags=68%, list=32%, signal=100%
MOOTHA_FFA_OXYDATION	MOOTHA_FFA_OXYDATION		22	0.561816	1.51954	0.101833	0.152345	1	6720	tags=82%, list=36%, signal=128%
LAIHO_COLORECTAL_CANCER_SERRATED_DN	LAIHO_COLORECTAL_CANCER_SERRATED_DN		76	0.446048	1.51922	0.0767591	0.152388	1	4727	tags=50%, list=25%, signal=67%
SANSOM_APC_TARGETS	SANSOM_APC_TARGETS		196	0.351823	1.5191	0.0215517	0.152223	1	4396	tags=39%, list=23%, signal=51%
ONDER_CDH1_TARGETS_1_DN	ONDER_CDH1_TARGETS_1_DN		163	0.402237	1.51896	0.067086	0.152069	1	3229	tags=37%, list=17%, signal=44%
REACTOME_AMINO_ACID_SYNTHESIS_AND_INTERCONVERSION_TRANSAMINATION	REACTOME_AMINO_ACID_SYNTHESIS_AND_INTERCONVERSION_TRANSAMINATION		15	0.594031	1.51793	0.0877944	0.152683	1	2009	tags=40%, list=11%, signal=45%
SA_G1_AND_S_PHASES	SA_G1_AND_S_PHASES		15	0.588026	1.51776	0.06639	0.152562	1	6436	tags=73%, list=34%, signal=112%
CHENG_RESPONSE_TO_NICKEL_ACETATE	CHENG_RESPONSE_TO_NICKEL_ACETATE		41	0.455048	1.51766	0.0568421	0.152403	1	6020	tags=63%, list=32%, signal=93%
ZHAN_MULTIPLE_MYELOMA_CD2_DN	ZHAN_MULTIPLE_MYELOMA_CD2_DN		45	0.412768	1.51701	0.0383795	0.152694	1	3255	tags=44%, list=17%, signal=54%
ROESSLER_LIVER_CANCER_METASTASIS_DN	ROESSLER_LIVER_CANCER_METASTASIS_DN		45	0.401652	1.51633	0.0463158	0.153008	1	2642	tags=36%, list=14%, signal=41%
REACTOME_FORMATION_OF_THE_TERNARY_COMPLEX_AND_SUBSEQUENTLY_THE_43S_COMPLEX	REACTOME_FORMATION_OF_THE_TERNARY_COMPLEX_AND_SUBSEQUENTLY_THE_43S_COMPLEX		48	0.62725	1.51552	0.114	0.153429	1	6599	tags=92%, list=35%, signal=141%
VANTVEER_BREAST_CANCER_ESR1_DN	VANTVEER_BREAST_CANCER_ESR1_DN		226	0.366903	1.51487	0.0567227	0.153747	1	2429	tags=27%, list=13%, signal=30%
REACTOME_PERK_REGULATED_GENE_EXPRESSION	REACTOME_PERK_REGULATED_GENE_EXPRESSION		26	0.51567	1.5142	0.0654008	0.154142	1	3594	tags=46%, list=19%, signal=57%
PENG_GLUCOSE_DEPRIVATION_DN	PENG_GLUCOSE_DEPRIVATION_DN		163	0.373126	1.51378	0.0548246	0.154229	1	3122	tags=36%, list=17%, signal=42%
ENK_UV_RESPONSE_KERATINOCYTE_DN	ENK_UV_RESPONSE_KERATINOCYTE_DN		479	0.375517	1.51374	0.0847108	0.154013	1	4812	tags=44%, list=26%, signal=58%
STARK_PREFRONTAL_CORTEX_22Q11_DELETION_DN	STARK_PREFRONTAL_CORTEX_22Q11_DELETION_DN		471	0.425231	1.51284	0.0777311	0.154567	1	5787	tags=57%, list=31%, signal=80%
CHICAS_RB1_TARGETS_LOW_SERUM	CHICAS_RB1_TARGETS_LOW_SERUM		84	0.444317	1.51163	0.0894942	0.155414	1	3995	tags=46%, list=21%, signal=59%
WANG_RESPONSE_TO_FORSKOLIN_UP	WANG_RESPONSE_TO_FORSKOLIN_UP		22	0.497793	1.51071	0.0655738	0.155915	1	3465	tags=36%, list=19%, signal=45%
PID_TELOMERASE_PATHWAY	PID_TELOMERASE_PATHWAY		67	0.411906	1.51021	0.0711297	0.156136	1	3915	tags=40%, list=21%, signal=51%
MCCABE_HOXC6_TARGETS_CANCER_DN	MCCABE_HOXC6_TARGETS_CANCER_DN		20	0.5178	1.51015	0.0742268	0.155951	1	4698	tags=60%, list=25%, signal=80%
LOCKWOOD_AMPLIFIED_IN_LUNG_CANCER	LOCKWOOD_AMPLIFIED_IN_LUNG_CANCER		205	0.386293	1.50928	0.0882353	0.156451	1	4774	tags=43%, list=26%, signal=58%
BERTUCCI_MEDULLARY_VS_DUCTAL_BREAST_CANCER_UP	BERTUCCI_MEDULLARY_VS_DUCTAL_BREAST_CANCER_UP		187	0.429945	1.50878	0.0985626	0.156615	1	3961	tags=41%, list=21%, signal=51%
TOMIDA_METASTASIS_DN	TOMIDA_METASTASIS_DN		17	0.517434	1.5084	0.0795918	0.156669	1	7697	tags=76%, list=41%, signal=130%
SCHEIDEREIT_IKK_INTERACTING_PROTEINS	SCHEIDEREIT_IKK_INTERACTING_PROTEINS		57	0.419429	1.50812	0.062249	0.156688	1	2322	tags=33%, list=12%, signal=38%
PID_MTOR_4PATHWAY	PID_MTOR_4PATHWAY		69	0.401059	1.50723	0.0539957	0.157235	1	5698	tags=51%, list=30%, signal=73%
FLECHNER_BIOPSY_KIDNEY_TRANSPLANT_OK_VS_DONOR_DN	FLECHNER_BIOPSY_KIDNEY_TRANSPLANT_OK_VS_DONOR_DN		25	0.479035	1.50636	0.0555556	0.157705	1	5146	tags=56%, list=28%, signal=77%
REACTOME_DESTABILIZATION_OF_MRNA_BY_BRF1	REACTOME_DESTABILIZATION_OF_MRNA_BY_BRF1		17	0.545775	1.50613	0.0983607	0.157636	1	5530	tags=71%, list=30%, signal=100%
MARKS_HDAC_TARGETS_DN	MARKS_HDAC_TARGETS_DN		15	0.541545	1.50369	0.0819672	0.159504	1	2789	tags=40%, list=15%, signal=47%
GAZIN_EPIGENETIC_SILENCING_BY_KRAS	GAZIN_EPIGENETIC_SILENCING_BY_KRAS		25	0.489331	1.50367	0.0766045	0.15927	1	4764	tags=60%, list=25%, signal=80%
GROSS_HYPOXIA_VIA_ELK3_AND_HIF1A_DN	GROSS_HYPOXIA_VIA_ELK3_AND_HIF1A_DN		100	0.370728	1.50179	0.0480167	0.160662	1	2246	tags=31%, list=12%, signal=35%
ZHAN_V2_LATE_DIFFERENTIATION_GENES	ZHAN_V2_LATE_DIFFERENTIATION_GENES		42	0.460795	1.50167	0.08	0.160497	1	3227	tags=40%, list=17%, signal=49%
XU_CREBBP_TARGETS_UP	XU_CREBBP_TARGETS_UP		24	0.499362	1.5009	0.0833333	0.160928	1	4695	tags=50%, list=25%, signal=67%
ELVIDGE_HIF1A_TARGETS_UP	ELVIDGE_HIF1A_TARGETS_UP		63	0.446525	1.49989	0.0798319	0.1616	1	5830	tags=65%, list=31%, signal=94%
HEIDENBLAD_AMPLICON_8Q24_UP	HEIDENBLAD_AMPLICON_8Q24_UP		34	0.453846	1.49985	0.0770878	0.161382	1	3260	tags=47%, list=17%, signal=57%
KANG_FLUOROURACIL_RESISTANCE_DN	KANG_FLUOROURACIL_RESISTANCE_DN		16	0.603577	1.49954	0.0786749	0.161416	1	3312	tags=56%, list=18%, signal=68%
SMITH_LIVER_CANCER	SMITH_LIVER_CANCER		43	0.462086	1.49925	0.0858896	0.161436	1	5574	tags=56%, list=30%, signal=79%
REACTOME_LOSS_OF_NLP_FROM_MITOTIC_CENTROSOMES	REACTOME_LOSS_OF_NLP_FROM_MITOTIC_CENTROSOMES		55	0.432546	1.4986	0.0843882	0.161776	1	5001	tags=51%, list=27%, signal=69%
REACTOME_GLYCEROPHOSPHOLIPID_BIOSYNTHESIS	REACTOME_GLYCEROPHOSPHOLIPID_BIOSYNTHESIS		79	0.385651	1.49837	0.0462555	0.161729	1	6595	tags=53%, list=35%, signal=82%
REACTOME_GLUCOSE_METABOLISM	REACTOME_GLUCOSE_METABOLISM		62	0.431928	1.49741	0.0796646	0.162311	1	4576	tags=45%, list=24%, signal=60%
REACTOME_PROTEIN_FOLDING	REACTOME_PROTEIN_FOLDING		51	0.429814	1.49655	0.0876827	0.162781	1	4834	tags=47%, list=26%, signal=63%
BOYAULT_LIVER_CANCER_SUBCLASS_G1_UP	BOYAULT_LIVER_CANCER_SUBCLASS_G1_UP		106	0.387234	1.49581	0.0518672	0.16317	1	4742	tags=47%, list=25%, signal=63%
REACTOME_ANTIGEN_PROCESSING_CROSS_PRESENTATION	REACTOME_ANTIGEN_PROCESSING_CROSS_PRESENTATION		72	0.505747	1.49443	0.118126	0.164053	1	5033	tags=68%, list=27%, signal=93%
SEIDEN_ONCOGENESIS_BY_MET	SEIDEN_ONCOGENESIS_BY_MET		84	0.482366	1.49377	0.12043	0.164353	1	5137	tags=63%, list=27%, signal=87%
SETLUR_PROSTATE_CANCER_TMPRSS2_ERG_FUSION_UP	SETLUR_PROSTATE_CANCER_TMPRSS2_ERG_FUSION_UP		64	0.381413	1.49361	0.0381526	0.164265	1	3349	tags=41%, list=18%, signal=49%
MOOTHA_VOXPHOS	MOOTHA_VOXPHOS		84	0.593155	1.49347	0.146091	0.164137	1	6136	tags=85%, list=33%, signal=125%
REACTOME_NONSENSE_MEDIATED_DECAY_ENHANCED_BY_THE_EXON_JUNCTION_COMPLEX	REACTOME_NONSENSE_MEDIATED_DECAY_ENHANCED_BY_THE_EXON_JUNCTION_COMPLEX		106	0.569605	1.49331	0.14257	0.164036	1	6991	tags=88%, list=37%, signal=139%
BOYLAN_MULTIPLE_MYELOMA_C_D_UP	BOYLAN_MULTIPLE_MYELOMA_C_D_UP		130	0.360797	1.49121	0.0625	0.165644	1	3100	tags=35%, list=17%, signal=41%
LIANG_HEMATOPOIESIS_STEM_CELL_NUMBER_LARGE_VS_TINY_DN	LIANG_HEMATOPOIESIS_STEM_CELL_NUMBER_LARGE_VS_TINY_DN		40	0.418833	1.49121	0.0393013	0.165397	1	5425	tags=50%, list=29%, signal=70%
SLEBOS_HEAD_AND_NECK_CANCER_WITH_HPV_UP	SLEBOS_HEAD_AND_NECK_CANCER_WITH_HPV_UP		78	0.447262	1.49068	0.0964361	0.165615	1	4130	tags=45%, list=22%, signal=57%
LIU_NASOPHARYNGEAL_CARCINOMA	LIU_NASOPHARYNGEAL_CARCINOMA		63	0.395489	1.49024	0.0477178	0.165794	1	4659	tags=43%, list=25%, signal=57%
NUNODA_RESPONSE_TO_DASATINIB_IMATINIB_UP	NUNODA_RESPONSE_TO_DASATINIB_IMATINIB_UP		29	0.478119	1.48981	0.0756303	0.165893	1	4353	tags=48%, list=23%, signal=63%
PECE_MAMMARY_STEM_CELL_UP	PECE_MAMMARY_STEM_CELL_UP		134	0.476691	1.48941	0.112474	0.166003	1	6771	tags=65%, list=36%, signal=101%
LIAO_METASTASIS	LIAO_METASTASIS		495	0.322586	1.48899	0.0477178	0.166123	1	4766	tags=40%, list=25%, signal=53%
PID_CDC42_PATHWAY	PID_CDC42_PATHWAY		69	0.42028	1.48879	0.0790598	0.166057	1	5390	tags=49%, list=29%, signal=69%
BIOCARTA_G1_PATHWAY	BIOCARTA_G1_PATHWAY		28	0.460175	1.48862	0.0736196	0.165963	1	2813	tags=43%, list=15%, signal=50%
KEGG_BASAL_TRANSCRIPTION_FACTORS	KEGG_BASAL_TRANSCRIPTION_FACTORS		35	0.452549	1.48784	0.0740741	0.166399	1	5575	tags=66%, list=30%, signal=93%
PARK_HSC_VS_MULTIPOTENT_PROGENITORS_DN	PARK_HSC_VS_MULTIPOTENT_PROGENITORS_DN		18	0.549355	1.48737	0.0965665	0.166569	1	6201	tags=67%, list=33%, signal=100%
LIU_PROSTATE_CANCER_UP	LIU_PROSTATE_CANCER_UP		88	0.402102	1.48711	0.0734127	0.166532	1	6433	tags=59%, list=34%, signal=90%
STONER_ESOPHAGEAL_CARCINOGENESIS_UP	STONER_ESOPHAGEAL_CARCINOGENESIS_UP		36	0.461586	1.48522	0.0730689	0.167926	1	6754	tags=61%, list=36%, signal=95%
BACOLOD_RESISTANCE_TO_ALKYLATING_AGENTS_DN	BACOLOD_RESISTANCE_TO_ALKYLATING_AGENTS_DN		57	0.419252	1.48412	0.0744681	0.168689	1	5540	tags=54%, list=30%, signal=77%
HSIAO_HOUSEKEEPING_GENES	HSIAO_HOUSEKEEPING_GENES		384	0.433038	1.48359	0.136546	0.168928	1	5764	tags=58%, list=31%, signal=83%
SYED_ESTRADIOL_RESPONSE	SYED_ESTRADIOL_RESPONSE		19	0.490994	1.48291	0.0690377	0.169258	1	4022	tags=47%, list=21%, signal=60%
YIH_RESPONSE_TO_ARSENITE_C3	YIH_RESPONSE_TO_ARSENITE_C3		35	0.412204	1.48282	0.0715746	0.169074	1	3990	tags=43%, list=21%, signal=54%
GENTILE_UV_LOW_DOSE_UP	GENTILE_UV_LOW_DOSE_UP		27	0.488917	1.4826	0.0611814	0.169039	1	4062	tags=41%, list=22%, signal=52%
REACTOME_RESPIRATORY_ELECTRON_TRANSPORT_ATP_SYNTHESIS_BY_CHEMIOSMOTIC_COUPLING_AND_HEAT_PRODUCTION_BY_UNCOUPLING_PROTEINS_	REACTOME_RESPIRATORY_ELECTRON_TRANSPORT_ATP_SYNTHESIS_BY_CHEMIOSMOTIC_COUPLING_AND_HEAT_PRODUCTION_BY_UNCOUPLING_PROTEINS_		80	0.610216	1.4825	0.139059	0.168881	1	5406	tags=76%, list=29%, signal=107%
REACTOME_RESPIRATORY_ELECTRON_TRANSPORT	REACTOME_RESPIRATORY_ELECTRON_TRANSPORT		64	0.620088	1.48216	0.145709	0.168919	1	6680	tags=92%, list=36%, signal=143%
BRACHAT_RESPONSE_TO_METHOTREXATE_DN	BRACHAT_RESPONSE_TO_METHOTREXATE_DN		26	0.501954	1.4821	0.0817996	0.168732	1	4810	tags=54%, list=26%, signal=72%
REACTOME_RNA_POL_III_TRANSCRIPTION_INITIATION_FROM_TYPE_3_PROMOTER	REACTOME_RNA_POL_III_TRANSCRIPTION_INITIATION_FROM_TYPE_3_PROMOTER		26	0.485727	1.48117	0.0942184	0.16929	1	5804	tags=65%, list=31%, signal=95%
BIOCARTA_RACCYCD_PATHWAY	BIOCARTA_RACCYCD_PATHWAY		26	0.476726	1.48069	0.0852391	0.169442	1	5725	tags=58%, list=31%, signal=83%
GAZDA_DIAMOND_BLACKFAN_ANEMIA_PROGENITOR_DN	GAZDA_DIAMOND_BLACKFAN_ANEMIA_PROGENITOR_DN		62	0.425637	1.48061	0.0639175	0.169255	1	3922	tags=44%, list=21%, signal=55%
MARKS_ACETYLATED_NON_HISTONE_PROTEINS	MARKS_ACETYLATED_NON_HISTONE_PROTEINS		15	0.52064	1.47948	0.055794	0.169973	1	3929	tags=47%, list=21%, signal=59%
CHOW_RASSF1_TARGETS_UP	CHOW_RASSF1_TARGETS_UP		26	0.4907	1.47925	0.0845361	0.169952	1	6294	tags=62%, list=34%, signal=93%
MARIADASON_RESPONSE_TO_BUTYRATE_SULINDAC_4	MARIADASON_RESPONSE_TO_BUTYRATE_SULINDAC_4		21	0.532684	1.47905	0.0831556	0.169868	1	2373	tags=33%, list=13%, signal=38%
ROESSLER_LIVER_CANCER_METASTASIS_UP	ROESSLER_LIVER_CANCER_METASTASIS_UP		102	0.347516	1.47875	0.0229645	0.169923	1	6622	tags=50%, list=35%, signal=77%
WANG_LMO4_TARGETS_UP	WANG_LMO4_TARGETS_UP		332	0.327712	1.47813	0.0539957	0.170187	1	4473	tags=36%, list=24%, signal=47%
KORKOLA_YOLK_SAC_TUMOR_UP	KORKOLA_YOLK_SAC_TUMOR_UP		19	0.562932	1.47806	0.116832	0.169993	1	3539	tags=53%, list=19%, signal=65%
WANG_CLIM2_TARGETS_DN	WANG_CLIM2_TARGETS_DN		176	0.375059	1.47633	0.0940171	0.171247	1	5398	tags=47%, list=29%, signal=65%
KAYO_AGING_MUSCLE_DN	KAYO_AGING_MUSCLE_DN		119	0.366493	1.4758	0.0639659	0.171508	1	5242	tags=47%, list=28%, signal=65%
VANDESLUIS_COMMD1_TARGETS_GROUP_2_UP	VANDESLUIS_COMMD1_TARGETS_GROUP_2_UP		15	0.547597	1.47469	0.0701754	0.17229	1	3260	tags=40%, list=17%, signal=48%
REACTOME_INFLUENZA_VIRAL_RNA_TRANSCRIPTION_AND_REPLICATION	REACTOME_INFLUENZA_VIRAL_RNA_TRANSCRIPTION_AND_REPLICATION		101	0.597046	1.47297	0.148	0.173594	1	7178	tags=93%, list=38%, signal=150%
REACTOME_SYNTHESIS_OF_PC	REACTOME_SYNTHESIS_OF_PC		18	0.48856	1.47224	0.0845361	0.174015	1	5816	tags=56%, list=31%, signal=81%
KEGG_CYSTEINE_AND_METHIONINE_METABOLISM	KEGG_CYSTEINE_AND_METHIONINE_METABOLISM		34	0.445373	1.47198	0.0677966	0.173979	1	3506	tags=35%, list=19%, signal=43%
HOLLEMAN_PREDNISOLONE_RESISTANCE_B_ALL_UP	HOLLEMAN_PREDNISOLONE_RESISTANCE_B_ALL_UP		22	0.545135	1.47184	0.115063	0.173859	1	5547	tags=68%, list=30%, signal=97%
REACTOME_3_UTR_MEDIATED_TRANSLATIONAL_REGULATION	REACTOME_3_UTR_MEDIATED_TRANSLATIONAL_REGULATION		105	0.599898	1.4718	0.148893	0.173648	1	6991	tags=91%, list=37%, signal=145%
YANG_BREAST_CANCER_ESR1_BULK_DN	YANG_BREAST_CANCER_ESR1_BULK_DN		22	0.481325	1.47031	0.089613	0.174739	1	1793	tags=36%, list=10%, signal=40%
DAZARD_UV_RESPONSE_CLUSTER_G1	DAZARD_UV_RESPONSE_CLUSTER_G1		63	0.430455	1.47011	0.101796	0.174662	1	6077	tags=54%, list=32%, signal=80%
REACTOME_SIGNALING_BY_TGF_BETA_RECEPTOR_COMPLEX	REACTOME_SIGNALING_BY_TGF_BETA_RECEPTOR_COMPLEX		60	0.410682	1.47004	0.0829876	0.174471	1	7096	tags=63%, list=38%, signal=102%
SHEPARD_BMYB_MORPHOLINO_UP	SHEPARD_BMYB_MORPHOLINO_UP		201	0.322276	1.46836	0.0475207	0.175768	1	4301	tags=35%, list=23%, signal=45%
REACTOME_PEROXISOMAL_LIPID_METABOLISM	REACTOME_PEROXISOMAL_LIPID_METABOLISM		20	0.535972	1.46702	0.108696	0.17672	1	6822	tags=80%, list=36%, signal=126%
PID_BETA_CATENIN_DEG_PATHWAY	PID_BETA_CATENIN_DEG_PATHWAY		18	0.519724	1.46696	0.0954447	0.176516	1	4931	tags=50%, list=26%, signal=68%
SA_B_CELL_RECEPTOR_COMPLEXES	SA_B_CELL_RECEPTOR_COMPLEXES		24	0.480271	1.46553	0.103175	0.177566	1	6412	tags=50%, list=34%, signal=76%
BIOCARTA_IGF1MTOR_PATHWAY	BIOCARTA_IGF1MTOR_PATHWAY		20	0.498144	1.46481	0.113445	0.177991	1	4764	tags=60%, list=25%, signal=80%
ZHAN_MULTIPLE_MYELOMA_MS_DN	ZHAN_MULTIPLE_MYELOMA_MS_DN		38	0.413705	1.46013	0.0728745	0.182165	1	5401	tags=45%, list=29%, signal=63%
REACTOME_RNA_POL_III_TRANSCRIPTION_TERMINATION	REACTOME_RNA_POL_III_TRANSCRIPTION_TERMINATION		19	0.507364	1.45811	0.0947368	0.183787	1	5143	tags=68%, list=27%, signal=94%
SANDERSON_PPARA_TARGETS	SANDERSON_PPARA_TARGETS		15	0.536183	1.45757	0.0898204	0.18402	1	5060	tags=67%, list=27%, signal=91%
BILD_E2F3_ONCOGENIC_SIGNATURE	BILD_E2F3_ONCOGENIC_SIGNATURE		222	0.327035	1.45522	0.0472279	0.18599	1	3327	tags=32%, list=18%, signal=38%
BARIS_THYROID_CANCER_DN	BARIS_THYROID_CANCER_DN		57	0.386413	1.45439	0.0603622	0.186571	1	3583	tags=40%, list=19%, signal=50%
VANDESLUIS_COMMD1_TARGETS_GROUP_3_UP	VANDESLUIS_COMMD1_TARGETS_GROUP_3_UP		85	0.394939	1.45409	0.0781563	0.186635	1	5095	tags=44%, list=27%, signal=60%
ANDERSEN_CHOLANGIOCARCINOMA_CLASS2	ANDERSEN_CHOLANGIOCARCINOMA_CLASS2		167	0.436802	1.45406	0.119748	0.186407	1	6128	tags=59%, list=33%, signal=87%
ZHU_CMV_ALL_UP	ZHU_CMV_ALL_UP		119	0.410922	1.45294	0.112705	0.187233	1	3258	tags=35%, list=17%, signal=42%
COLLIS_PRKDC_REGULATORS	COLLIS_PRKDC_REGULATORS		15	0.534111	1.45264	0.0860656	0.187239	1	4022	tags=60%, list=21%, signal=76%
REACTOME_SYNTHESIS_OF_PIPS_AT_THE_GOLGI_MEMBRANE	REACTOME_SYNTHESIS_OF_PIPS_AT_THE_GOLGI_MEMBRANE		17	0.517433	1.45205	0.0993658	0.187528	1	4303	tags=41%, list=23%, signal=53%
HU_ANGIOGENESIS_DN	HU_ANGIOGENESIS_DN		36	0.489793	1.45197	0.108696	0.187343	1	4059	tags=53%, list=22%, signal=67%
CHEN_LUNG_CANCER_SURVIVAL	CHEN_LUNG_CANCER_SURVIVAL		26	0.501173	1.45097	0.0851064	0.187982	1	3719	tags=46%, list=20%, signal=58%
BENPORATH_ES_2	BENPORATH_ES_2		40	0.442476	1.45097	0.100604	0.187721	1	2335	tags=35%, list=12%, signal=40%
PID_CERAMIDE_PATHWAY	PID_CERAMIDE_PATHWAY		48	0.403772	1.45076	0.0994036	0.18766	1	6724	tags=60%, list=36%, signal=94%
FOSTER_KDM1A_TARGETS_DN	FOSTER_KDM1A_TARGETS_DN		195	0.338038	1.45059	0.0582121	0.18754	1	5389	tags=44%, list=29%, signal=61%
REACTOME_ASPARAGINE_N_LINKED_GLYCOSYLATION	REACTOME_ASPARAGINE_N_LINKED_GLYCOSYLATION		80	0.432184	1.447	0.116803	0.190692	1	6258	tags=63%, list=33%, signal=94%
REACTOME_SRP_DEPENDENT_COTRANSLATIONAL_PROTEIN_TARGETING_TO_MEMBRANE	REACTOME_SRP_DEPENDENT_COTRANSLATIONAL_PROTEIN_TARGETING_TO_MEMBRANE		107	0.573967	1.44675	0.164	0.190677	1	7178	tags=85%, list=38%, signal=137%
ZUCCHI_METASTASIS_UP	ZUCCHI_METASTASIS_UP		38	0.426032	1.44673	0.0924025	0.190431	1	2533	tags=37%, list=14%, signal=43%
ZHONG_SECRETOME_OF_LUNG_CANCER_AND_MACROPHAGE	ZHONG_SECRETOME_OF_LUNG_CANCER_AND_MACROPHAGE		74	0.416245	1.44557	0.102823	0.191318	1	4005	tags=47%, list=21%, signal=60%
KEGG_ALZHEIMERS_DISEASE	KEGG_ALZHEIMERS_DISEASE		156	0.415735	1.4453	0.137014	0.191322	1	3345	tags=40%, list=18%, signal=48%
GOTZMANN_EPITHELIAL_TO_MESENCHYMAL_TRANSITION_DN	GOTZMANN_EPITHELIAL_TO_MESENCHYMAL_TRANSITION_DN		199	0.345245	1.44453	0.0724638	0.19183	1	5890	tags=48%, list=31%, signal=70%
STANELLE_E2F1_TARGETS	STANELLE_E2F1_TARGETS		27	0.420863	1.44363	0.0866808	0.192456	1	4204	tags=44%, list=22%, signal=57%
TERAMOTO_OPN_TARGETS_CLUSTER_7	TERAMOTO_OPN_TARGETS_CLUSTER_7		19	0.462757	1.44178	0.0673469	0.193902	1	5950	tags=42%, list=32%, signal=62%
SENGUPTA_NASOPHARYNGEAL_CARCINOMA_UP	SENGUPTA_NASOPHARYNGEAL_CARCINOMA_UP		275	0.391344	1.44145	0.128	0.193974	1	2128	tags=33%, list=11%, signal=36%
LUI_TARGETS_OF_PAX8_PPARG_FUSION	LUI_TARGETS_OF_PAX8_PPARG_FUSION		34	0.525891	1.44131	0.131737	0.193845	1	6516	tags=79%, list=35%, signal=122%
MURAKAMI_UV_RESPONSE_1HR_UP	MURAKAMI_UV_RESPONSE_1HR_UP		16	0.568468	1.43838	0.136555	0.196488	1	2010	tags=31%, list=11%, signal=35%
KEGG_GLYCOLYSIS_GLUCONEOGENESIS	KEGG_GLYCOLYSIS_GLUCONEOGENESIS		59	0.406108	1.43772	0.0905172	0.196842	1	5382	tags=42%, list=29%, signal=59%
NIKOLSKY_BREAST_CANCER_5P15_AMPLICON	NIKOLSKY_BREAST_CANCER_5P15_AMPLICON		26	0.562807	1.43733	0.128834	0.196979	1	3977	tags=46%, list=21%, signal=59%
PURBEY_TARGETS_OF_CTBP1_AND_SATB1_DN	PURBEY_TARGETS_OF_CTBP1_AND_SATB1_DN		174	0.313591	1.43719	0.035343	0.196844	1	4522	tags=37%, list=24%, signal=49%
BILANGES_RAPAMYCIN_SENSITIVE_VIA_TSC1_AND_TSC2	BILANGES_RAPAMYCIN_SENSITIVE_VIA_TSC1_AND_TSC2		72	0.47717	1.43616	0.150206	0.197598	1	5724	tags=65%, list=31%, signal=94%
BYSTROEM_CORRELATED_WITH_IL5_UP	BYSTROEM_CORRELATED_WITH_IL5_UP		50	0.379703	1.43489	0.0751566	0.198548	1	5247	tags=42%, list=28%, signal=58%
REACTOME_TRIGLYCERIDE_BIOSYNTHESIS	REACTOME_TRIGLYCERIDE_BIOSYNTHESIS		36	0.437288	1.43453	0.09375	0.198629	1	6588	tags=64%, list=35%, signal=98%
JAZAG_TGFB1_SIGNALING_UP	JAZAG_TGFB1_SIGNALING_UP		105	0.32808	1.43405	0.030426	0.198801	1	5094	tags=43%, list=27%, signal=59%
LIN_MELANOMA_COPY_NUMBER_UP	LIN_MELANOMA_COPY_NUMBER_UP		67	0.397455	1.4338	0.0762887	0.19878	1	6590	tags=52%, list=35%, signal=80%
BIOCARTA_MTOR_PATHWAY	BIOCARTA_MTOR_PATHWAY		23	0.488573	1.43263	0.124464	0.199677	1	7213	tags=70%, list=39%, signal=113%
ST_FAS_SIGNALING_PATHWAY	ST_FAS_SIGNALING_PATHWAY		63	0.378596	1.43205	0.08125	0.199984	1	5311	tags=49%, list=28%, signal=68%
WHITFIELD_CELL_CYCLE_M_G1	WHITFIELD_CELL_CYCLE_M_G1		140	0.363055	1.43179	0.0997831	0.199952	1	3845	tags=36%, list=21%, signal=45%
REACTOME_RNA_POL_I_TRANSCRIPTION_INITIATION	REACTOME_RNA_POL_I_TRANSCRIPTION_INITIATION		23	0.52254	1.43169	0.120805	0.199796	1	6486	tags=78%, list=35%, signal=120%
GENTILE_RESPONSE_CLUSTER_D3	GENTILE_RESPONSE_CLUSTER_D3		61	0.399705	1.42969	0.124211	0.201441	1	4872	tags=44%, list=26%, signal=60%
PID_FOXO_PATHWAY	PID_FOXO_PATHWAY		49	0.40851	1.42957	0.100209	0.201306	1	4911	tags=49%, list=26%, signal=66%
WANG_SMARCE1_TARGETS_DN	WANG_SMARCE1_TARGETS_DN		348	0.332447	1.42866	0.0863158	0.201966	1	3108	tags=32%, list=17%, signal=38%
JACKSON_DNMT1_TARGETS_DN	JACKSON_DNMT1_TARGETS_DN		24	0.458305	1.42781	0.0934394	0.202553	1	2237	tags=42%, list=12%, signal=47%
SPIRA_SMOKERS_LUNG_CANCER_DN	SPIRA_SMOKERS_LUNG_CANCER_DN		19	0.45142	1.42628	0.0892116	0.203838	1	3818	tags=42%, list=20%, signal=53%
REACTOME_SHC1_EVENTS_IN_EGFR_SIGNALING	REACTOME_SHC1_EVENTS_IN_EGFR_SIGNALING		15	0.505617	1.42532	0.106695	0.204537	1	8385	tags=87%, list=45%, signal=157%
CHNG_MULTIPLE_MYELOMA_HYPERPLOID_UP	CHNG_MULTIPLE_MYELOMA_HYPERPLOID_UP		52	0.577608	1.42512	0.182731	0.20445	1	6703	tags=85%, list=36%, signal=131%
GRATIAS_RETINOBLASTOMA_16Q24	GRATIAS_RETINOBLASTOMA_16Q24		15	0.631264	1.42458	0.16	0.204679	1	5557	tags=73%, list=30%, signal=104%
KIM_MYC_AMPLIFICATION_TARGETS_UP	KIM_MYC_AMPLIFICATION_TARGETS_UP		186	0.366212	1.42339	0.114286	0.205587	1	4423	tags=45%, list=24%, signal=59%
KEGG_OXIDATIVE_PHOSPHORYLATION	KEGG_OXIDATIVE_PHOSPHORYLATION		116	0.500756	1.42307	0.177914	0.205601	1	6137	tags=67%, list=33%, signal=99%
KEGG_SELENOAMINO_ACID_METABOLISM	KEGG_SELENOAMINO_ACID_METABOLISM		25	0.458407	1.42258	0.101695	0.205778	1	6095	tags=60%, list=33%, signal=89%
KEGG_AMINO_SUGAR_AND_NUCLEOTIDE_SUGAR_METABOLISM	KEGG_AMINO_SUGAR_AND_NUCLEOTIDE_SUGAR_METABOLISM		44	0.445872	1.42202	0.129979	0.206079	1	4530	tags=48%, list=24%, signal=63%
LU_EZH2_TARGETS_UP	LU_EZH2_TARGETS_UP		260	0.376554	1.42107	0.123529	0.206795	1	6619	tags=55%, list=35%, signal=83%
REACTOME_TRANSCRIPTIONAL_ACTIVITY_OF_SMAD2_SMAD3_SMAD4_HETEROTRIMER	REACTOME_TRANSCRIPTIONAL_ACTIVITY_OF_SMAD2_SMAD3_SMAD4_HETEROTRIMER		36	0.439259	1.42099	0.119658	0.206601	1	7096	tags=64%, list=38%, signal=103%
REACTOME_FACTORS_INVOLVED_IN_MEGAKARYOCYTE_DEVELOPMENT_AND_PLATELET_PRODUCTION	REACTOME_FACTORS_INVOLVED_IN_MEGAKARYOCYTE_DEVELOPMENT_AND_PLATELET_PRODUCTION		115	0.33831	1.42084	0.0808511	0.206479	1	6723	tags=56%, list=36%, signal=86%
HONMA_DOCETAXEL_RESISTANCE	HONMA_DOCETAXEL_RESISTANCE		30	0.525739	1.42084	0.165618	0.206208	1	5315	tags=70%, list=28%, signal=98%
WAKABAYASHI_ADIPOGENESIS_PPARG_RXRA_BOUND_WITH_H4K20ME1_MARK	WAKABAYASHI_ADIPOGENESIS_PPARG_RXRA_BOUND_WITH_H4K20ME1_MARK		132	0.351222	1.42009	0.0706861	0.206676	1	6618	tags=53%, list=35%, signal=81%
CHIARETTI_T_ALL_RELAPSE_PROGNOSIS	CHIARETTI_T_ALL_RELAPSE_PROGNOSIS		19	0.510871	1.41855	0.12115	0.207915	1	2700	tags=53%, list=14%, signal=61%
KYNG_ENVIRONMENTAL_STRESS_RESPONSE_DN	KYNG_ENVIRONMENTAL_STRESS_RESPONSE_DN		19	0.481106	1.41685	0.108911	0.209345	1	1617	tags=37%, list=9%, signal=40%
REACTOME_RNA_POL_III_CHAIN_ELONGATION	REACTOME_RNA_POL_III_CHAIN_ELONGATION		17	0.509797	1.4163	0.109705	0.209606	1	5143	tags=71%, list=27%, signal=97%
PID_RAC1_PATHWAY	PID_RAC1_PATHWAY		54	0.402975	1.41488	0.116	0.210798	1	5317	tags=48%, list=28%, signal=67%
HOFFMANN_IMMATURE_TO_MATURE_B_LYMPHOCYTE_DN	HOFFMANN_IMMATURE_TO_MATURE_B_LYMPHOCYTE_DN		50	0.394934	1.41465	0.0824742	0.210734	1	3319	tags=36%, list=18%, signal=44%
DEURIG_T_CELL_PROLYMPHOCYTIC_LEUKEMIA_UP	DEURIG_T_CELL_PROLYMPHOCYTIC_LEUKEMIA_UP		342	0.306089	1.41432	0.0560345	0.210788	1	3700	tags=31%, list=20%, signal=38%
KEGG_PARKINSONS_DISEASE	KEGG_PARKINSONS_DISEASE		111	0.497318	1.41382	0.159919	0.211007	1	5406	tags=63%, list=29%, signal=88%
CHOI_ATL_CHRONIC_VS_ACUTE_DN	CHOI_ATL_CHRONIC_VS_ACUTE_DN		18	0.505844	1.41029	0.123482	0.214158	1	3984	tags=56%, list=21%, signal=71%
GAVIN_FOXP3_TARGETS_CLUSTER_T7	GAVIN_FOXP3_TARGETS_CLUSTER_T7		95	0.396632	1.40998	0.105578	0.214214	1	5800	tags=52%, list=31%, signal=74%
BIOCARTA_CARM_ER_PATHWAY	BIOCARTA_CARM_ER_PATHWAY		35	0.417249	1.40818	0.116232	0.215781	1	5919	tags=60%, list=32%, signal=88%
REACTOME_ACTIVATION_OF_GENES_BY_ATF4	REACTOME_ACTIVATION_OF_GENES_BY_ATF4		23	0.479939	1.40798	0.116327	0.215704	1	3594	tags=43%, list=19%, signal=54%
RASHI_RESPONSE_TO_IONIZING_RADIATION_3	RASHI_RESPONSE_TO_IONIZING_RADIATION_3		46	0.390326	1.40726	0.0835073	0.216137	1	4233	tags=41%, list=23%, signal=53%
REACTOME_FATTY_ACID_TRIACYLGLYCEROL_AND_KETONE_BODY_METABOLISM	REACTOME_FATTY_ACID_TRIACYLGLYCEROL_AND_KETONE_BODY_METABOLISM		165	0.334758	1.40662	0.0662526	0.216516	1	5989	tags=50%, list=32%, signal=72%
NIKOLSKY_BREAST_CANCER_12Q24_AMPLICON	NIKOLSKY_BREAST_CANCER_12Q24_AMPLICON		15	0.564514	1.40642	0.153846	0.216443	1	3336	tags=53%, list=18%, signal=65%
OISHI_CHOLANGIOMA_STEM_CELL_LIKE_UP	OISHI_CHOLANGIOMA_STEM_CELL_LIKE_UP		323	0.357655	1.40559	0.149798	0.217028	1	5392	tags=46%, list=29%, signal=63%
VANTVEER_BREAST_CANCER_BRCA1_UP	VANTVEER_BREAST_CANCER_BRCA1_UP		31	0.460256	1.40465	0.124473	0.21767	1	5361	tags=52%, list=29%, signal=72%
RASHI_RESPONSE_TO_IONIZING_RADIATION_4	RASHI_RESPONSE_TO_IONIZING_RADIATION_4		57	0.364892	1.40263	0.0718816	0.219465	1	4101	tags=37%, list=22%, signal=47%
TERAO_AOX4_TARGETS_SKIN_UP	TERAO_AOX4_TARGETS_SKIN_UP		35	0.395399	1.40248	0.0809129	0.219309	1	6291	tags=54%, list=34%, signal=82%
BHATI_G2M_ARREST_BY_2METHOXYESTRADIOL_UP	BHATI_G2M_ARREST_BY_2METHOXYESTRADIOL_UP		109	0.328538	1.40101	0.0697168	0.220513	1	2873	tags=30%, list=15%, signal=36%
MORI_SMALL_PRE_BII_LYMPHOCYTE_DN	MORI_SMALL_PRE_BII_LYMPHOCYTE_DN		74	0.376071	1.40046	0.0895833	0.220746	1	3491	tags=42%, list=19%, signal=51%
BROWNE_HCMV_INFECTION_18HR_UP	BROWNE_HCMV_INFECTION_18HR_UP		171	0.342007	1.40023	0.106918	0.220687	1	4474	tags=38%, list=24%, signal=50%
GROSS_HYPOXIA_VIA_ELK3_UP	GROSS_HYPOXIA_VIA_ELK3_UP		198	0.324071	1.39872	0.0957447	0.221952	1	3842	tags=37%, list=21%, signal=46%
LI_LUNG_CANCER	LI_LUNG_CANCER		41	0.433504	1.39835	0.121339	0.222054	1	4680	tags=46%, list=25%, signal=62%
PID_TRAIL_PATHWAY	PID_TRAIL_PATHWAY		28	0.442455	1.3982	0.121457	0.221933	1	3375	tags=39%, list=18%, signal=48%
BLUM_RESPONSE_TO_SALIRASIB_UP	BLUM_RESPONSE_TO_SALIRASIB_UP		236	0.365874	1.39744	0.102222	0.22247	1	5592	tags=47%, list=30%, signal=66%
KEGG_PURINE_METABOLISM	KEGG_PURINE_METABOLISM		154	0.31734	1.39502	0.0903491	0.224623	1	3693	tags=38%, list=20%, signal=47%
WU_HBX_TARGETS_3_UP	WU_HBX_TARGETS_3_UP		18	0.47376	1.39463	0.132114	0.224746	1	1428	tags=33%, list=8%, signal=36%
BAKKER_FOXO3_TARGETS_DN	BAKKER_FOXO3_TARGETS_DN		169	0.308899	1.39455	0.0615711	0.224539	1	4171	tags=36%, list=22%, signal=45%
LUI_THYROID_CANCER_CLUSTER_3	LUI_THYROID_CANCER_CLUSTER_3		28	0.557768	1.39272	0.156627	0.226228	1	6516	tags=89%, list=35%, signal=137%
PID_CIRCADIAN_PATHWAY	PID_CIRCADIAN_PATHWAY		15	0.495236	1.39215	0.129787	0.2265	1	2302	tags=40%, list=12%, signal=46%
NAKAMURA_TUMOR_ZONE_PERIPHERAL_VS_CENTRAL_UP	NAKAMURA_TUMOR_ZONE_PERIPHERAL_VS_CENTRAL_UP		268	0.341682	1.39102	0.117284	0.227482	1	3101	tags=39%, list=17%, signal=46%
WILLIAMS_ESR1_TARGETS_UP	WILLIAMS_ESR1_TARGETS_UP		26	0.413892	1.38825	0.0967078	0.230145	1	915	tags=31%, list=5%, signal=32%
TIMOFEEVA_GROWTH_STRESS_VIA_STAT1_DN	TIMOFEEVA_GROWTH_STRESS_VIA_STAT1_DN		16	0.497836	1.38724	0.138144	0.230992	1	3518	tags=50%, list=19%, signal=62%
WANG_LMO4_TARGETS_DN	WANG_LMO4_TARGETS_DN		326	0.325426	1.38677	0.11691	0.2312	1	6036	tags=48%, list=32%, signal=70%
NIKOLSKY_BREAST_CANCER_8Q23_Q24_AMPLICON	NIKOLSKY_BREAST_CANCER_8Q23_Q24_AMPLICON		142	0.428428	1.38487	0.183673	0.232918	1	4274	tags=43%, list=23%, signal=55%
MARIADASON_REGULATED_BY_HISTONE_ACETYLATION_DN	MARIADASON_REGULATED_BY_HISTONE_ACETYLATION_DN		48	0.373783	1.38462	0.108871	0.232895	1	5064	tags=50%, list=27%, signal=68%
BARRIER_COLON_CANCER_RECURRENCE_UP	BARRIER_COLON_CANCER_RECURRENCE_UP		41	0.433405	1.3831	0.121681	0.234211	1	4474	tags=39%, list=24%, signal=51%
KEGG_PROTEIN_EXPORT	KEGG_PROTEIN_EXPORT		22	0.543527	1.38296	0.150743	0.234084	1	5335	tags=55%, list=29%, signal=76%
REACTOME_ENOS_ACTIVATION_AND_REGULATION	REACTOME_ENOS_ACTIVATION_AND_REGULATION		19	0.493898	1.38214	0.116424	0.23463	1	6494	tags=68%, list=35%, signal=105%
ZHAN_EARLY_DIFFERENTIATION_GENES_DN	ZHAN_EARLY_DIFFERENTIATION_GENES_DN		42	0.438183	1.38132	0.138075	0.235162	1	2900	tags=33%, list=16%, signal=39%
CROONQUIST_NRAS_VS_STROMAL_STIMULATION_DN	CROONQUIST_NRAS_VS_STROMAL_STIMULATION_DN		99	0.363363	1.37862	0.143154	0.237838	1	1813	tags=34%, list=10%, signal=38%
TAKAO_RESPONSE_TO_UVB_RADIATION_UP	TAKAO_RESPONSE_TO_UVB_RADIATION_UP		82	0.457088	1.37786	0.200401	0.238337	1	6403	tags=65%, list=34%, signal=98%
KEGG_SPHINGOLIPID_METABOLISM	KEGG_SPHINGOLIPID_METABOLISM		36	0.399517	1.37755	0.11134	0.238345	1	6527	tags=50%, list=35%, signal=77%
MARIADASON_RESPONSE_TO_BUTYRATE_SULINDAC_6	MARIADASON_RESPONSE_TO_BUTYRATE_SULINDAC_6		46	0.394968	1.37751	0.130859	0.238093	1	3258	tags=37%, list=17%, signal=45%
REACTOME_RNA_POL_I_PROMOTER_OPENING	REACTOME_RNA_POL_I_PROMOTER_OPENING		58	0.519644	1.37673	0.220408	0.23867	1	8742	tags=88%, list=47%, signal=165%
KYNG_RESPONSE_TO_H2O2_VIA_ERCC6_UP	KYNG_RESPONSE_TO_H2O2_VIA_ERCC6_UP		39	0.379367	1.37413	0.10338	0.241198	1	1531	tags=26%, list=8%, signal=28%
JISON_SICKLE_CELL_DISEASE_DN	JISON_SICKLE_CELL_DISEASE_DN		173	0.352286	1.37202	0.139004	0.243229	1	5423	tags=50%, list=29%, signal=70%
HAHTOLA_SEZARY_SYNDROM_UP	HAHTOLA_SEZARY_SYNDROM_UP		92	0.354812	1.37093	0.102041	0.244106	1	3351	tags=33%, list=18%, signal=40%
TOOKER_GEMCITABINE_RESISTANCE_UP	TOOKER_GEMCITABINE_RESISTANCE_UP		76	0.377707	1.36788	0.119342	0.247183	1	6469	tags=59%, list=35%, signal=90%
MATZUK_MEIOTIC_AND_DNA_REPAIR	MATZUK_MEIOTIC_AND_DNA_REPAIR		37	0.38718	1.36693	0.120902	0.247962	1	5142	tags=51%, list=27%, signal=71%
LINSLEY_MIR16_TARGETS	LINSLEY_MIR16_TARGETS		190	0.334917	1.36691	0.114165	0.247676	1	4124	tags=36%, list=22%, signal=46%
ZUCCHI_METASTASIS_DN	ZUCCHI_METASTASIS_DN		41	0.422801	1.36562	0.131579	0.248747	1	6427	tags=63%, list=34%, signal=96%
DORN_ADENOVIRUS_INFECTION_32HR_DN	DORN_ADENOVIRUS_INFECTION_32HR_DN		39	0.433027	1.36489	0.161359	0.24931	1	3719	tags=33%, list=20%, signal=42%
SWEET_KRAS_ONCOGENIC_SIGNATURE	SWEET_KRAS_ONCOGENIC_SIGNATURE		88	0.373945	1.36328	0.121514	0.250773	1	5473	tags=45%, list=29%, signal=64%
DACOSTA_UV_RESPONSE_VIA_ERCC3_TTD_UP	DACOSTA_UV_RESPONSE_VIA_ERCC3_TTD_UP		62	0.401203	1.36216	0.151394	0.251698	1	3986	tags=45%, list=21%, signal=57%
ELVIDGE_HYPOXIA_BY_DMOG_DN	ELVIDGE_HYPOXIA_BY_DMOG_DN		54	0.38283	1.36215	0.106426	0.251407	1	6247	tags=59%, list=33%, signal=89%
SESTO_RESPONSE_TO_UV_C7	SESTO_RESPONSE_TO_UV_C7		65	0.402592	1.36079	0.137131	0.252611	1	5056	tags=48%, list=27%, signal=65%
FARMER_BREAST_CANCER_CLUSTER_5	FARMER_BREAST_CANCER_CLUSTER_5		18	0.579934	1.36068	0.186404	0.252444	1	4731	tags=61%, list=25%, signal=82%
DACOSTA_UV_RESPONSE_VIA_ERCC3_XPCS_UP	DACOSTA_UV_RESPONSE_VIA_ERCC3_XPCS_UP		25	0.434876	1.35942	0.1167	0.253543	1	6716	tags=76%, list=36%, signal=118%
BURTON_ADIPOGENESIS_PEAK_AT_8HR	BURTON_ADIPOGENESIS_PEAK_AT_8HR		39	0.381668	1.35774	0.106122	0.255131	1	3100	tags=33%, list=17%, signal=40%
NEMETH_INFLAMMATORY_RESPONSE_LPS_DN	NEMETH_INFLAMMATORY_RESPONSE_LPS_DN		32	0.413253	1.35736	0.139583	0.25524	1	3856	tags=41%, list=21%, signal=51%
KENNY_CTNNB1_TARGETS_UP	KENNY_CTNNB1_TARGETS_UP		46	0.357247	1.35724	0.115942	0.255064	1	1671	tags=28%, list=9%, signal=31%
SAKAI_CHRONIC_HEPATITIS_VS_LIVER_CANCER_UP	SAKAI_CHRONIC_HEPATITIS_VS_LIVER_CANCER_UP		79	0.41539	1.35642	0.190776	0.255708	1	5695	tags=57%, list=30%, signal=82%
LUCAS_HNF4A_TARGETS_UP	LUCAS_HNF4A_TARGETS_UP		55	0.380052	1.35566	0.123732	0.25626	1	4186	tags=44%, list=22%, signal=56%
VIETOR_IFRD1_TARGETS	VIETOR_IFRD1_TARGETS		21	0.462935	1.35344	0.13617	0.258468	1	5394	tags=57%, list=29%, signal=80%
FLECHNER_PBL_KIDNEY_TRANSPLANT_OK_VS_DONOR_UP	FLECHNER_PBL_KIDNEY_TRANSPLANT_OK_VS_DONOR_UP		145	0.336257	1.35213	0.145791	0.25962	1	4485	tags=39%, list=24%, signal=51%
PETROVA_PROX1_TARGETS_UP	PETROVA_PROX1_TARGETS_UP		27	0.424058	1.35195	0.131687	0.259498	1	1813	tags=44%, list=10%, signal=49%
KYNG_RESPONSE_TO_H2O2_VIA_ERCC6_DN	KYNG_RESPONSE_TO_H2O2_VIA_ERCC6_DN		44	0.385495	1.35192	0.14433	0.259215	1	5242	tags=52%, list=28%, signal=72%
HOFFMANN_SMALL_PRE_BII_TO_IMMATURE_B_LYMPHOCYTE_DN	HOFFMANN_SMALL_PRE_BII_TO_IMMATURE_B_LYMPHOCYTE_DN		46	0.352109	1.35149	0.0820312	0.259348	1	2006	tags=28%, list=11%, signal=32%
MARKEY_RB1_CHRONIC_LOF_UP	MARKEY_RB1_CHRONIC_LOF_UP		111	0.334459	1.35093	0.0995935	0.259665	1	3022	tags=35%, list=16%, signal=42%
REACTOME_MEIOTIC_SYNAPSIS	REACTOME_MEIOTIC_SYNAPSIS		70	0.419778	1.35057	0.1875	0.259781	1	5863	tags=50%, list=31%, signal=73%
JIANG_AGING_HYPOTHALAMUS_UP	JIANG_AGING_HYPOTHALAMUS_UP		46	0.454556	1.35048	0.182752	0.259603	1	5327	tags=63%, list=28%, signal=88%
MARKS_HDAC_TARGETS_UP	MARKS_HDAC_TARGETS_UP		22	0.428768	1.35042	0.117769	0.259355	1	2487	tags=36%, list=13%, signal=42%
KAMMINGA_SENESCENCE	KAMMINGA_SENESCENCE		39	0.364599	1.34938	0.108108	0.260205	1	4043	tags=41%, list=22%, signal=52%
KOKKINAKIS_METHIONINE_DEPRIVATION_48HR_DN	KOKKINAKIS_METHIONINE_DEPRIVATION_48HR_DN		64	0.330863	1.34893	0.110664	0.260352	1	2199	tags=28%, list=12%, signal=32%
PID_ERBB1_DOWNSTREAM_PATHWAY	PID_ERBB1_DOWNSTREAM_PATHWAY		105	0.354443	1.34798	0.170576	0.261052	1	5390	tags=43%, list=29%, signal=60%
BOYLAN_MULTIPLE_MYELOMA_C_UP	BOYLAN_MULTIPLE_MYELOMA_C_UP		44	0.370826	1.34757	0.109731	0.261206	1	3684	tags=41%, list=20%, signal=51%
REACTOME_UNFOLDED_PROTEIN_RESPONSE	REACTOME_UNFOLDED_PROTEIN_RESPONSE		73	0.383344	1.34741	0.146998	0.261072	1	5480	tags=51%, list=29%, signal=71%
LOPEZ_MBD_TARGETS_IMPRINTED_AND_X_LINKED	LOPEZ_MBD_TARGETS_IMPRINTED_AND_X_LINKED		16	0.532166	1.34725	0.168357	0.260939	1	5218	tags=69%, list=28%, signal=95%
AIGNER_ZEB1_TARGETS	AIGNER_ZEB1_TARGETS		34	0.477941	1.34603	0.191147	0.261989	1	4600	tags=50%, list=25%, signal=66%
LINDGREN_BLADDER_CANCER_WITH_LOH_IN_CHR9Q	LINDGREN_BLADDER_CANCER_WITH_LOH_IN_CHR9Q		106	0.41153	1.34256	0.210417	0.265692	1	5294	tags=48%, list=28%, signal=67%
GARGALOVIC_RESPONSE_TO_OXIDIZED_PHOSPHOLIPIDS_GREEN_DN	GARGALOVIC_RESPONSE_TO_OXIDIZED_PHOSPHOLIPIDS_GREEN_DN		22	0.416359	1.34112	0.117155	0.266985	1	5868	tags=64%, list=31%, signal=93%
HOFMANN_MYELODYSPLASTIC_SYNDROM_RISK_UP	HOFMANN_MYELODYSPLASTIC_SYNDROM_RISK_UP		24	0.438915	1.3406	0.151639	0.267304	1	2611	tags=33%, list=14%, signal=39%
SESTO_RESPONSE_TO_UV_C2	SESTO_RESPONSE_TO_UV_C2		53	0.402006	1.34042	0.158898	0.267232	1	5183	tags=53%, list=28%, signal=73%
KEGG_BUTANOATE_METABOLISM	KEGG_BUTANOATE_METABOLISM		33	0.420249	1.34033	0.158635	0.267012	1	6133	tags=55%, list=33%, signal=81%
BIOCARTA_HCMV_PATHWAY	BIOCARTA_HCMV_PATHWAY		17	0.483789	1.34012	0.172549	0.266943	1	5371	tags=59%, list=29%, signal=82%
OZEN_MIR125B1_TARGETS	OZEN_MIR125B1_TARGETS		25	0.427694	1.33623	0.148305	0.271026	1	3042	tags=44%, list=16%, signal=52%
REACTOME_PEPTIDE_CHAIN_ELONGATION	REACTOME_PEPTIDE_CHAIN_ELONGATION		85	0.593042	1.33527	0.222892	0.271854	1	7178	tags=93%, list=38%, signal=150%
NIKOLSKY_BREAST_CANCER_1Q21_AMPLICON	NIKOLSKY_BREAST_CANCER_1Q21_AMPLICON		37	0.4765	1.33483	0.197125	0.272022	1	3626	tags=46%, list=19%, signal=57%
KRIEG_KDM3A_TARGETS_NOT_HYPOXIA	KRIEG_KDM3A_TARGETS_NOT_HYPOXIA		185	0.323866	1.33469	0.12749	0.271871	1	3433	tags=34%, list=18%, signal=41%
KEGG_RIBOSOME	KEGG_RIBOSOME		87	0.593736	1.33218	0.219959	0.274476	1	7178	tags=91%, list=38%, signal=147%
SABATES_COLORECTAL_ADENOMA_UP	SABATES_COLORECTAL_ADENOMA_UP		128	0.340155	1.33202	0.110204	0.27435	1	7523	tags=51%, list=40%, signal=84%
SHAFFER_IRF4_TARGETS_IN_MYELOMA_VS_MATURE_B_LYMPHOCYTE	SHAFFER_IRF4_TARGETS_IN_MYELOMA_VS_MATURE_B_LYMPHOCYTE		99	0.363773	1.33191	0.15812	0.274134	1	4302	tags=39%, list=23%, signal=51%
YAGI_AML_RELAPSE_PROGNOSIS	YAGI_AML_RELAPSE_PROGNOSIS		34	0.413829	1.33084	0.146751	0.275058	1	3943	tags=47%, list=21%, signal=60%
SESTO_RESPONSE_TO_UV_C1	SESTO_RESPONSE_TO_UV_C1		72	0.405644	1.33081	0.134172	0.274772	1	4403	tags=50%, list=24%, signal=65%
LABBE_WNT3A_TARGETS_UP	LABBE_WNT3A_TARGETS_UP		108	0.305282	1.32969	0.0929752	0.275691	1	2996	tags=29%, list=16%, signal=34%
KYNG_WERNER_SYNDROM_AND_NORMAL_AGING_UP	KYNG_WERNER_SYNDROM_AND_NORMAL_AGING_UP		88	0.322052	1.32911	0.0897436	0.276054	1	2943	tags=27%, list=16%, signal=32%
CROMER_METASTASIS_DN	CROMER_METASTASIS_DN		80	0.421062	1.32907	0.179325	0.275772	1	5513	tags=52%, list=29%, signal=74%
KEGG_PROPANOATE_METABOLISM	KEGG_PROPANOATE_METABOLISM		32	0.440929	1.32904	0.167355	0.275477	1	5382	tags=53%, list=29%, signal=74%
REACTOME_MEMBRANE_TRAFFICKING	REACTOME_MEMBRANE_TRAFFICKING		124	0.339068	1.32869	0.140756	0.275563	1	6972	tags=54%, list=37%, signal=86%
BIOCARTA_CHEMICAL_PATHWAY	BIOCARTA_CHEMICAL_PATHWAY		22	0.429583	1.32857	0.128773	0.27539	1	2487	tags=45%, list=13%, signal=52%
MARCINIAK_ER_STRESS_RESPONSE_VIA_CHOP	MARCINIAK_ER_STRESS_RESPONSE_VIA_CHOP		24	0.420631	1.32832	0.126273	0.275379	1	1123	tags=25%, list=6%, signal=27%
KEGG_ALANINE_ASPARTATE_AND_GLUTAMATE_METABOLISM	KEGG_ALANINE_ASPARTATE_AND_GLUTAMATE_METABOLISM		32	0.40135	1.32832	0.134	0.275065	1	6854	tags=66%, list=37%, signal=103%
ACEVEDO_LIVER_CANCER_WITH_H3K9ME3_DN	ACEVEDO_LIVER_CANCER_WITH_H3K9ME3_DN		110	0.3148	1.32787	0.113636	0.275271	1	3008	tags=25%, list=16%, signal=30%
JAEGER_METASTASIS_UP	JAEGER_METASTASIS_UP		43	0.398463	1.32722	0.162791	0.275712	1	884	tags=26%, list=5%, signal=27%
BIOCARTA_ATM_PATHWAY	BIOCARTA_ATM_PATHWAY		19	0.446614	1.32647	0.170732	0.276225	1	5311	tags=58%, list=28%, signal=81%
BHAT_ESR1_TARGETS_VIA_AKT1_UP	BHAT_ESR1_TARGETS_VIA_AKT1_UP		267	0.308082	1.32599	0.125514	0.276489	1	3989	tags=34%, list=21%, signal=42%
ZHANG_RESPONSE_TO_IKK_INHIBITOR_AND_TNF_DN	ZHANG_RESPONSE_TO_IKK_INHIBITOR_AND_TNF_DN		100	0.332636	1.32415	0.153361	0.278325	1	3631	tags=36%, list=19%, signal=44%
WALLACE_PROSTATE_CANCER_RACE_DN	WALLACE_PROSTATE_CANCER_RACE_DN		74	0.330719	1.32225	0.106339	0.28022	1	5816	tags=49%, list=31%, signal=70%
ZEMBUTSU_SENSITIVITY_TO_METHOTREXATE	ZEMBUTSU_SENSITIVITY_TO_METHOTREXATE		17	0.446976	1.32178	0.136268	0.280434	1	3352	tags=35%, list=18%, signal=43%
DITTMER_PTHLH_TARGETS_DN	DITTMER_PTHLH_TARGETS_DN		72	0.340757	1.32176	0.135307	0.280134	1	4756	tags=40%, list=25%, signal=54%
YOKOE_CANCER_TESTIS_ANTIGENS	YOKOE_CANCER_TESTIS_ANTIGENS		33	0.387239	1.3212	0.123142	0.280503	1	3967	tags=39%, list=21%, signal=50%
BIOCARTA_STRESS_PATHWAY	BIOCARTA_STRESS_PATHWAY		25	0.427419	1.32095	0.170431	0.280454	1	5311	tags=40%, list=28%, signal=56%
KAAB_FAILED_HEART_VENTRICLE_DN	KAAB_FAILED_HEART_VENTRICLE_DN		40	0.394669	1.32031	0.171206	0.280884	1	2345	tags=30%, list=13%, signal=34%
ABRAHAM_ALPC_VS_MULTIPLE_MYELOMA_DN	ABRAHAM_ALPC_VS_MULTIPLE_MYELOMA_DN		19	0.446496	1.32031	0.168959	0.280563	1	5939	tags=68%, list=32%, signal=100%
TOMLINS_PROSTATE_CANCER_UP	TOMLINS_PROSTATE_CANCER_UP		39	0.39788	1.31935	0.157783	0.281351	1	4395	tags=49%, list=23%, signal=64%
KIM_TIAL1_TARGETS	KIM_TIAL1_TARGETS		31	0.407081	1.31845	0.154489	0.282032	1	2787	tags=35%, list=15%, signal=42%
KEGG_CYTOSOLIC_DNA_SENSING_PATHWAY	KEGG_CYTOSOLIC_DNA_SENSING_PATHWAY		42	0.391262	1.31737	0.176	0.282996	1	7155	tags=64%, list=38%, signal=104%
WENG_POR_TARGETS_GLOBAL_UP	WENG_POR_TARGETS_GLOBAL_UP		20	0.463871	1.31734	0.167015	0.282707	1	4274	tags=45%, list=23%, signal=58%
BOHN_PRIMARY_IMMUNODEFICIENCY_SYNDROM_UP	BOHN_PRIMARY_IMMUNODEFICIENCY_SYNDROM_UP		45	0.384148	1.31693	0.168467	0.282859	1	3004	tags=40%, list=16%, signal=48%
TOOKER_GEMCITABINE_RESISTANCE_DN	TOOKER_GEMCITABINE_RESISTANCE_DN		119	0.348848	1.31528	0.17234	0.28449	1	4311	tags=45%, list=23%, signal=59%
PENG_GLUCOSE_DEPRIVATION_UP	PENG_GLUCOSE_DEPRIVATION_UP		45	0.409438	1.31499	0.165605	0.2845	1	5281	tags=49%, list=28%, signal=68%
BIOCARTA_RAS_PATHWAY	BIOCARTA_RAS_PATHWAY		23	0.442005	1.31495	0.191753	0.284236	1	6905	tags=70%, list=37%, signal=110%
SMIRNOV_RESPONSE_TO_IR_2HR_UP	SMIRNOV_RESPONSE_TO_IR_2HR_UP		48	0.377901	1.31441	0.171488	0.284568	1	4204	tags=33%, list=22%, signal=43%
BORLAK_LIVER_CANCER_EGF_UP	BORLAK_LIVER_CANCER_EGF_UP		55	0.353841	1.31381	0.136646	0.284929	1	2283	tags=25%, list=12%, signal=29%
MA_MYELOID_DIFFERENTIATION_UP	MA_MYELOID_DIFFERENTIATION_UP		38	0.379307	1.31257	0.146138	0.28611	1	4309	tags=37%, list=23%, signal=48%
BROWNE_HCMV_INFECTION_24HR_UP	BROWNE_HCMV_INFECTION_24HR_UP		139	0.296992	1.31068	0.0876827	0.288089	1	5548	tags=43%, list=30%, signal=61%
KEGG_OOCYTE_MEIOSIS	KEGG_OOCYTE_MEIOSIS		108	0.334476	1.31041	0.147368	0.288082	1	3277	tags=32%, list=18%, signal=39%
BILANGES_SERUM_RESPONSE_TRANSLATION	BILANGES_SERUM_RESPONSE_TRANSLATION		34	0.455036	1.30933	0.227723	0.28906	1	5511	tags=62%, list=29%, signal=87%
SCHUETZ_BREAST_CANCER_DUCTAL_INVASIVE_DN	SCHUETZ_BREAST_CANCER_DUCTAL_INVASIVE_DN		82	0.345448	1.30909	0.152083	0.289031	1	5097	tags=37%, list=27%, signal=50%
GRAESSMANN_RESPONSE_TO_MC_AND_SERUM_DEPRIVATION_DN	GRAESSMANN_RESPONSE_TO_MC_AND_SERUM_DEPRIVATION_DN		78	0.319585	1.30844	0.0960334	0.28944	1	5684	tags=42%, list=30%, signal=61%
WANG_TUMOR_INVASIVENESS_DN	WANG_TUMOR_INVASIVENESS_DN		201	0.306484	1.30768	0.154639	0.29003	1	4268	tags=36%, list=23%, signal=47%
DACOSTA_UV_RESPONSE_VIA_ERCC3_COMMON_UP	DACOSTA_UV_RESPONSE_VIA_ERCC3_COMMON_UP		71	0.334035	1.30139	0.154506	0.297251	1	4269	tags=39%, list=23%, signal=51%
DARWICHE_PAPILLOMA_RISK_LOW_UP	DARWICHE_PAPILLOMA_RISK_LOW_UP		150	0.306935	1.30077	0.109244	0.297671	1	3567	tags=29%, list=19%, signal=35%
HOSHIDA_LIVER_CANCER_SURVIVAL_DN	HOSHIDA_LIVER_CANCER_SURVIVAL_DN		110	0.311581	1.30073	0.122736	0.297378	1	4528	tags=33%, list=24%, signal=43%
KYNG_WERNER_SYNDROM_AND_NORMAL_AGING_DN	KYNG_WERNER_SYNDROM_AND_NORMAL_AGING_DN		212	0.291229	1.30068	0.120805	0.297118	1	6042	tags=44%, list=32%, signal=65%
SCHAEFFER_PROSTATE_DEVELOPMENT_AND_CANCER_BOX4_DN	SCHAEFFER_PROSTATE_DEVELOPMENT_AND_CANCER_BOX4_DN		32	0.423975	1.29996	0.21748	0.297688	1	5710	tags=63%, list=31%, signal=90%
KIM_ALL_DISORDERS_DURATION_CORR_DN	KIM_ALL_DISORDERS_DURATION_CORR_DN		142	0.392423	1.29985	0.200409	0.297483	1	5371	tags=49%, list=29%, signal=69%
REACTOME_PREFOLDIN_MEDIATED_TRANSFER_OF_SUBSTRATE_TO_CCT_TRIC	REACTOME_PREFOLDIN_MEDIATED_TRANSFER_OF_SUBSTRATE_TO_CCT_TRIC		27	0.454116	1.29981	0.218684	0.29719	1	4753	tags=52%, list=25%, signal=69%
ALONSO_METASTASIS_UP	ALONSO_METASTASIS_UP		186	0.344383	1.29927	0.181237	0.297499	1	5035	tags=47%, list=27%, signal=64%
REACTOME_APOPTOTIC_CLEAVAGE_OF_CELLULAR_PROTEINS	REACTOME_APOPTOTIC_CLEAVAGE_OF_CELLULAR_PROTEINS		36	0.396628	1.29854	0.174538	0.298102	1	3330	tags=42%, list=18%, signal=51%
REACTOME_ZINC_TRANSPORTERS	REACTOME_ZINC_TRANSPORTERS		15	0.470692	1.29848	0.152034	0.297854	1	7751	tags=67%, list=41%, signal=114%
REACTOME_POST_TRANSLATIONAL_PROTEIN_MODIFICATION	REACTOME_POST_TRANSLATIONAL_PROTEIN_MODIFICATION		176	0.333737	1.29788	0.179325	0.298201	1	5830	tags=46%, list=31%, signal=66%
ZWANG_EGF_PERSISTENTLY_DN	ZWANG_EGF_PERSISTENTLY_DN		54	0.333504	1.2967	0.118257	0.299202	1	5723	tags=52%, list=31%, signal=74%
CHIN_BREAST_CANCER_COPY_NUMBER_UP	CHIN_BREAST_CANCER_COPY_NUMBER_UP		24	0.441664	1.29612	0.186583	0.299552	1	6275	tags=58%, list=34%, signal=88%
MATZUK_SPERMATOCYTE	MATZUK_SPERMATOCYTE		70	0.319439	1.29549	0.123457	0.299969	1	4456	tags=36%, list=24%, signal=47%
RODRIGUES_NTN1_TARGETS_DN	RODRIGUES_NTN1_TARGETS_DN		151	0.309322	1.29351	0.150794	0.302024	1	5283	tags=40%, list=28%, signal=55%
MANN_RESPONSE_TO_AMIFOSTINE_UP	MANN_RESPONSE_TO_AMIFOSTINE_UP		20	0.457645	1.29338	0.212679	0.301826	1	6742	tags=60%, list=36%, signal=94%
KYNG_ENVIRONMENTAL_STRESS_RESPONSE_NOT_BY_4NQO_IN_WS	KYNG_ENVIRONMENTAL_STRESS_RESPONSE_NOT_BY_4NQO_IN_WS		39	0.351223	1.293	0.149688	0.301976	1	1617	tags=26%, list=9%, signal=28%
HONRADO_BREAST_CANCER_BRCA1_VS_BRCA2	HONRADO_BREAST_CANCER_BRCA1_VS_BRCA2		18	0.428926	1.29292	0.168016	0.30174	1	429	tags=28%, list=2%, signal=28%
DORN_ADENOVIRUS_INFECTION_48HR_DN	DORN_ADENOVIRUS_INFECTION_48HR_DN		40	0.40974	1.29285	0.189979	0.301484	1	3719	tags=33%, list=20%, signal=40%
DIRMEIER_LMP1_RESPONSE_LATE_UP	DIRMEIER_LMP1_RESPONSE_LATE_UP		55	0.40317	1.29257	0.195072	0.301483	1	5062	tags=44%, list=27%, signal=60%
SMID_BREAST_CANCER_ERBB2_UP	SMID_BREAST_CANCER_ERBB2_UP		133	0.341043	1.29251	0.161017	0.301217	1	7569	tags=55%, list=40%, signal=92%
CUI_TCF21_TARGETS_2_UP	CUI_TCF21_TARGETS_2_UP		404	0.294892	1.29219	0.149402	0.301284	1	3233	tags=35%, list=17%, signal=42%
PID_NFKAPPAB_ATYPICAL_PATHWAY	PID_NFKAPPAB_ATYPICAL_PATHWAY		17	0.425309	1.292	0.173116	0.301196	1	5925	tags=53%, list=32%, signal=77%
PID_MET_PATHWAY	PID_MET_PATHWAY		80	0.351182	1.29135	0.169772	0.301618	1	6574	tags=52%, list=35%, signal=81%
PETRETTO_HEART_MASS_QTL_CIS_DN	PETRETTO_HEART_MASS_QTL_CIS_DN		23	0.413775	1.29131	0.176349	0.301327	1	3790	tags=48%, list=20%, signal=60%
RASHI_RESPONSE_TO_IONIZING_RADIATION_5	RASHI_RESPONSE_TO_IONIZING_RADIATION_5		142	0.284741	1.28933	0.109091	0.303326	1	2558	tags=25%, list=14%, signal=29%
KUMAR_PATHOGEN_LOAD_BY_MACROPHAGES	KUMAR_PATHOGEN_LOAD_BY_MACROPHAGES		249	0.246993	1.28904	0.0452675	0.303362	1	4057	tags=28%, list=22%, signal=35%
REACTOME_GOLGI_ASSOCIATED_VESICLE_BIOGENESIS	REACTOME_GOLGI_ASSOCIATED_VESICLE_BIOGENESIS		50	0.382462	1.28777	0.190574	0.304584	1	6807	tags=54%, list=36%, signal=85%
WANG_RESPONSE_TO_BEXAROTENE_UP	WANG_RESPONSE_TO_BEXAROTENE_UP		33	0.368345	1.28681	0.113546	0.305407	1	5473	tags=45%, list=29%, signal=64%
NAM_FXYD5_TARGETS_DN	NAM_FXYD5_TARGETS_DN		18	0.451511	1.2853	0.205074	0.306925	1	2408	tags=39%, list=13%, signal=45%
DAZARD_RESPONSE_TO_UV_SCC_UP	DAZARD_RESPONSE_TO_UV_SCC_UP		111	0.367513	1.28525	0.189765	0.306639	1	5387	tags=47%, list=29%, signal=65%
BAE_BRCA1_TARGETS_DN	BAE_BRCA1_TARGETS_DN		32	0.375038	1.28475	0.162393	0.306938	1	3366	tags=41%, list=18%, signal=49%
FARMER_BREAST_CANCER_APOCRINE_VS_BASAL	FARMER_BREAST_CANCER_APOCRINE_VS_BASAL		317	0.281673	1.28407	0.122494	0.307463	1	5602	tags=42%, list=30%, signal=58%
FARMER_BREAST_CANCER_CLUSTER_7	FARMER_BREAST_CANCER_CLUSTER_7		19	0.431442	1.28317	0.179487	0.308264	1	666	tags=32%, list=4%, signal=33%
MARZEC_IL2_SIGNALING_UP	MARZEC_IL2_SIGNALING_UP		110	0.330744	1.28262	0.154321	0.308601	1	1829	tags=24%, list=10%, signal=26%
BIOCARTA_TEL_PATHWAY	BIOCARTA_TEL_PATHWAY		18	0.439326	1.28247	0.188797	0.308438	1	5697	tags=56%, list=30%, signal=80%
KEGG_GLUTATHIONE_METABOLISM	KEGG_GLUTATHIONE_METABOLISM		47	0.385779	1.28064	0.188406	0.310364	1	4680	tags=45%, list=25%, signal=59%
SERVITJA_LIVER_HNF1A_TARGETS_UP	SERVITJA_LIVER_HNF1A_TARGETS_UP		132	0.287396	1.27985	0.101626	0.311034	1	3133	tags=27%, list=17%, signal=33%
KEGG_THYROID_CANCER	KEGG_THYROID_CANCER		29	0.381506	1.27886	0.165618	0.31198	1	5371	tags=55%, list=29%, signal=77%
BILANGES_SERUM_AND_RAPAMYCIN_SENSITIVE_GENES	BILANGES_SERUM_AND_RAPAMYCIN_SENSITIVE_GENES		66	0.519595	1.27788	0.265469	0.312861	1	7092	tags=82%, list=38%, signal=131%
KEEN_RESPONSE_TO_ROSIGLITAZONE_UP	KEEN_RESPONSE_TO_ROSIGLITAZONE_UP		37	0.394659	1.2765	0.191235	0.314237	1	4172	tags=54%, list=22%, signal=69%
GARY_CD5_TARGETS_UP	GARY_CD5_TARGETS_UP		444	0.293182	1.27616	0.147773	0.314322	1	5860	tags=43%, list=31%, signal=61%
WANG_RESPONSE_TO_ANDROGEN_UP	WANG_RESPONSE_TO_ANDROGEN_UP		27	0.393716	1.2759	0.193483	0.314267	1	3574	tags=33%, list=19%, signal=41%
BROWNE_HCMV_INFECTION_4HR_DN	BROWNE_HCMV_INFECTION_4HR_DN		244	0.257134	1.27552	0.0631579	0.314408	1	4003	tags=32%, list=21%, signal=41%
YIH_RESPONSE_TO_ARSENITE_C4	YIH_RESPONSE_TO_ARSENITE_C4		17	0.437864	1.27433	0.18896	0.315574	1	6442	tags=53%, list=34%, signal=81%
KEGG_ARGININE_AND_PROLINE_METABOLISM	KEGG_ARGININE_AND_PROLINE_METABOLISM		51	0.371714	1.27331	0.183838	0.316517	1	4504	tags=39%, list=24%, signal=52%
BILANGES_SERUM_SENSITIVE_GENES	BILANGES_SERUM_SENSITIVE_GENES		86	0.299256	1.27238	0.106719	0.317347	1	5724	tags=44%, list=31%, signal=63%
HEDENFALK_BREAST_CANCER_BRACX_DN	HEDENFALK_BREAST_CANCER_BRACX_DN		18	0.420609	1.27213	0.197065	0.317371	1	5009	tags=56%, list=27%, signal=76%
HOLLEMAN_VINCRISTINE_RESISTANCE_ALL_DN	HOLLEMAN_VINCRISTINE_RESISTANCE_ALL_DN		19	0.509642	1.27135	0.243461	0.317981	1	5242	tags=74%, list=28%, signal=102%
SHAFFER_IRF4_TARGETS_IN_ACTIVATED_DENDRITIC_CELL	SHAFFER_IRF4_TARGETS_IN_ACTIVATED_DENDRITIC_CELL		61	0.342147	1.27095	0.183633	0.318135	1	2825	tags=30%, list=15%, signal=35%
REACTOME_PACKAGING_OF_TELOMERE_ENDS	REACTOME_PACKAGING_OF_TELOMERE_ENDS		47	0.468897	1.2706	0.286869	0.318258	1	8742	tags=83%, list=47%, signal=155%
ZHONG_SECRETOME_OF_LUNG_CANCER_AND_FIBROBLAST	ZHONG_SECRETOME_OF_LUNG_CANCER_AND_FIBROBLAST		128	0.355769	1.27059	0.201613	0.317923	1	4246	tags=42%, list=23%, signal=54%
MULLIGHAN_NPM1_MUTATED_SIGNATURE_2_UP	MULLIGHAN_NPM1_MUTATED_SIGNATURE_2_UP		128	0.300262	1.27044	0.128898	0.317783	1	6314	tags=48%, list=34%, signal=71%
KEGG_PORPHYRIN_AND_CHLOROPHYLL_METABOLISM	KEGG_PORPHYRIN_AND_CHLOROPHYLL_METABOLISM		40	0.393056	1.27025	0.191358	0.317682	1	2261	tags=20%, list=12%, signal=23%
OKAWA_NEUROBLASTOMA_1P36_31_DELETION	OKAWA_NEUROBLASTOMA_1P36_31_DELETION		21	0.487581	1.26739	0.271984	0.320874	1	7768	tags=76%, list=42%, signal=130%
YAMASHITA_LIVER_CANCER_STEM_CELL_UP	YAMASHITA_LIVER_CANCER_STEM_CELL_UP		47	0.329889	1.26543	0.17623	0.323056	1	1672	tags=26%, list=9%, signal=28%
REACTOME_CTNNB1_PHOSPHORYLATION_CASCADE	REACTOME_CTNNB1_PHOSPHORYLATION_CASCADE		15	0.472487	1.26497	0.215606	0.323309	1	3735	tags=47%, list=20%, signal=58%
BROWNE_HCMV_INFECTION_48HR_UP	BROWNE_HCMV_INFECTION_48HR_UP		175	0.277819	1.26447	0.146186	0.323592	1	4650	tags=37%, list=25%, signal=48%
ODONNELL_METASTASIS_DN	ODONNELL_METASTASIS_DN		24	0.408388	1.26053	0.218254	0.328228	1	3822	tags=38%, list=20%, signal=47%
CAFFAREL_RESPONSE_TO_THC_UP	CAFFAREL_RESPONSE_TO_THC_UP		31	0.385765	1.26044	0.204641	0.328004	1	4461	tags=48%, list=24%, signal=63%
REACTOME_FORMATION_OF_TUBULIN_FOLDING_INTERMEDIATES_BY_CCT_TRIC	REACTOME_FORMATION_OF_TUBULIN_FOLDING_INTERMEDIATES_BY_CCT_TRIC		21	0.467063	1.25996	0.229645	0.328283	1	2508	tags=43%, list=13%, signal=49%
REACTOME_TRANS_GOLGI_NETWORK_VESICLE_BUDDING	REACTOME_TRANS_GOLGI_NETWORK_VESICLE_BUDDING		57	0.372313	1.25907	0.224066	0.329047	1	6972	tags=53%, list=37%, signal=84%
KEGG_DRUG_METABOLISM_OTHER_ENZYMES	KEGG_DRUG_METABOLISM_OTHER_ENZYMES		51	0.36048	1.25813	0.175983	0.329908	1	6413	tags=37%, list=34%, signal=57%
SILIGAN_TARGETS_OF_EWS_FLI1_FUSION_DN	SILIGAN_TARGETS_OF_EWS_FLI1_FUSION_DN		17	0.452872	1.25685	0.201597	0.331194	1	2855	tags=35%, list=15%, signal=42%
PID_HIF1A_PATHWAY	PID_HIF1A_PATHWAY		16	0.418242	1.255	0.196162	0.333203	1	6942	tags=63%, list=37%, signal=99%
REACTOME_RIG_I_MDA5_MEDIATED_INDUCTION_OF_IFN_ALPHA_BETA_PATHWAYS	REACTOME_RIG_I_MDA5_MEDIATED_INDUCTION_OF_IFN_ALPHA_BETA_PATHWAYS		60	0.357125	1.2546	0.196819	0.333359	1	4595	tags=35%, list=25%, signal=46%
LIN_MELANOMA_COPY_NUMBER_DN	LIN_MELANOMA_COPY_NUMBER_DN		40	0.401818	1.25304	0.230303	0.335009	1	3896	tags=45%, list=21%, signal=57%
DARWICHE_PAPILLOMA_RISK_HIGH_UP	DARWICHE_PAPILLOMA_RISK_HIGH_UP		137	0.299823	1.25296	0.172917	0.334765	1	3567	tags=28%, list=19%, signal=35%
KORKOLA_EMBRYONAL_CARCINOMA_UP	KORKOLA_EMBRYONAL_CARCINOMA_UP		40	0.41006	1.25205	0.250509	0.335612	1	3539	tags=35%, list=19%, signal=43%
MARIADASON_RESPONSE_TO_CURCUMIN_SULINDAC_5	MARIADASON_RESPONSE_TO_CURCUMIN_SULINDAC_5		21	0.402229	1.25205	0.19877	0.335268	1	5213	tags=62%, list=28%, signal=86%
HAHTOLA_MYCOSIS_FUNGOIDES_SKIN_DN	HAHTOLA_MYCOSIS_FUNGOIDES_SKIN_DN		26	0.414009	1.2517	0.222917	0.335361	1	6379	tags=46%, list=34%, signal=70%
PID_P53_DOWNSTREAM_PATHWAY	PID_P53_DOWNSTREAM_PATHWAY		134	0.314214	1.24866	0.175705	0.338838	1	5608	tags=45%, list=30%, signal=63%
PID_TAP63_PATHWAY	PID_TAP63_PATHWAY		54	0.353896	1.24765	0.171806	0.339765	1	5183	tags=41%, list=28%, signal=56%
KEGG_RIBOFLAVIN_METABOLISM	KEGG_RIBOFLAVIN_METABOLISM		16	0.424252	1.24736	0.211045	0.339786	1	7312	tags=50%, list=39%, signal=82%
PEART_HDAC_PROLIFERATION_CLUSTER_UP	PEART_HDAC_PROLIFERATION_CLUSTER_UP		55	0.33933	1.24718	0.190065	0.339695	1	4204	tags=40%, list=22%, signal=51%
KEGG_BIOSYNTHESIS_OF_UNSATURATED_FATTY_ACIDS	KEGG_BIOSYNTHESIS_OF_UNSATURATED_FATTY_ACIDS		20	0.424419	1.24674	0.202062	0.33986	1	5797	tags=55%, list=31%, signal=80%
WOO_LIVER_CANCER_RECURRENCE_DN	WOO_LIVER_CANCER_RECURRENCE_DN		78	0.356295	1.2466	0.199612	0.339682	1	5875	tags=47%, list=31%, signal=69%
KEGG_STEROID_BIOSYNTHESIS	KEGG_STEROID_BIOSYNTHESIS		16	0.485908	1.24623	0.232104	0.339808	1	4919	tags=56%, list=26%, signal=76%
SMIRNOV_RESPONSE_TO_IR_6HR_DN	SMIRNOV_RESPONSE_TO_IR_6HR_DN		108	0.346827	1.24584	0.243697	0.339935	1	2664	tags=29%, list=14%, signal=33%
CHARAFE_BREAST_CANCER_LUMINAL_VS_BASAL_UP	CHARAFE_BREAST_CANCER_LUMINAL_VS_BASAL_UP		344	0.29076	1.2453	0.189979	0.340288	1	5227	tags=40%, list=28%, signal=55%
GAL_LEUKEMIC_STEM_CELL_DN	GAL_LEUKEMIC_STEM_CELL_DN		233	0.321682	1.24387	0.20296	0.34175	1	951	tags=19%, list=5%, signal=20%
SCHAEFFER_PROSTATE_DEVELOPMENT_6HR_DN	SCHAEFFER_PROSTATE_DEVELOPMENT_6HR_DN		482	0.272232	1.2426	0.157025	0.34299	1	5778	tags=47%, list=31%, signal=66%
YOSHIOKA_LIVER_CANCER_EARLY_RECURRENCE_DN	YOSHIOKA_LIVER_CANCER_EARLY_RECURRENCE_DN		56	0.315584	1.2414	0.154618	0.344228	1	5552	tags=39%, list=30%, signal=56%
LI_WILMS_TUMOR_VS_FETAL_KIDNEY_2_UP	LI_WILMS_TUMOR_VS_FETAL_KIDNEY_2_UP		29	0.386747	1.23813	0.206544	0.348005	1	1181	tags=31%, list=6%, signal=33%
MURAKAMI_UV_RESPONSE_6HR_UP	MURAKAMI_UV_RESPONSE_6HR_UP		35	0.392339	1.23658	0.210309	0.349715	1	4000	tags=34%, list=21%, signal=44%
CHICAS_RB1_TARGETS_GROWING	CHICAS_RB1_TARGETS_GROWING		225	0.300726	1.23596	0.221074	0.350145	1	2530	tags=34%, list=14%, signal=39%
PID_ARF_3PATHWAY	PID_ARF_3PATHWAY		19	0.451195	1.23582	0.25	0.350007	1	6565	tags=68%, list=35%, signal=105%
MILI_PSEUDOPODIA_HAPTOTAXIS_UP	MILI_PSEUDOPODIA_HAPTOTAXIS_UP		483	0.347975	1.23569	0.235908	0.349806	1	5687	tags=49%, list=30%, signal=69%
GALLUZZI_PERMEABILIZE_MITOCHONDRIA	GALLUZZI_PERMEABILIZE_MITOCHONDRIA		43	0.343356	1.23505	0.187629	0.350343	1	5311	tags=49%, list=28%, signal=68%
PID_HDAC_CLASSIII_PATHWAY	PID_HDAC_CLASSIII_PATHWAY		25	0.371829	1.23473	0.211577	0.350404	1	5268	tags=44%, list=28%, signal=61%
LUI_THYROID_CANCER_PAX8_PPARG_DN	LUI_THYROID_CANCER_PAX8_PPARG_DN		45	0.424624	1.23431	0.247984	0.350592	1	6516	tags=73%, list=35%, signal=112%
PID_PI3KCI_AKT_PATHWAY	PID_PI3KCI_AKT_PATHWAY		35	0.376922	1.234	0.219149	0.350673	1	4911	tags=46%, list=26%, signal=62%
ZEMBUTSU_SENSITIVITY_TO_VINBLASTINE	ZEMBUTSU_SENSITIVITY_TO_VINBLASTINE		18	0.400615	1.23373	0.217647	0.350695	1	5589	tags=67%, list=30%, signal=95%
WHITE_NEUROBLASTOMA_WITH_1P36.3_DELETION	WHITE_NEUROBLASTOMA_WITH_1P36.3_DELETION		20	0.478754	1.23372	0.294715	0.35034	1	7768	tags=75%, list=42%, signal=128%
HOLLMANN_APOPTOSIS_VIA_CD40_DN	HOLLMANN_APOPTOSIS_VIA_CD40_DN		241	0.275694	1.23363	0.184524	0.350135	1	5269	tags=39%, list=28%, signal=54%
MAYBURD_RESPONSE_TO_L663536_UP	MAYBURD_RESPONSE_TO_L663536_UP		27	0.375597	1.23305	0.190275	0.350543	1	3689	tags=33%, list=20%, signal=41%
AMUNDSON_GENOTOXIC_SIGNATURE	AMUNDSON_GENOTOXIC_SIGNATURE		100	0.293416	1.23292	0.18711	0.350352	1	4353	tags=38%, list=23%, signal=49%
HOLLEMAN_VINCRISTINE_RESISTANCE_B_ALL_DN	HOLLEMAN_VINCRISTINE_RESISTANCE_B_ALL_DN		15	0.499856	1.23205	0.273469	0.351125	1	5491	tags=67%, list=29%, signal=94%
WAKABAYASHI_ADIPOGENESIS_PPARG_BOUND_36HR	WAKABAYASHI_ADIPOGENESIS_PPARG_BOUND_36HR		28	0.369093	1.2319	0.214737	0.35097	1	4418	tags=43%, list=24%, signal=56%
BIOCARTA_ETS_PATHWAY	BIOCARTA_ETS_PATHWAY		18	0.422145	1.23099	0.236948	0.351839	1	1040	tags=28%, list=6%, signal=29%
OSMAN_BLADDER_CANCER_DN	OSMAN_BLADDER_CANCER_DN		349	0.293307	1.23055	0.191489	0.352062	1	6951	tags=53%, list=37%, signal=82%
TURASHVILI_BREAST_CARCINOMA_DUCTAL_VS_LOBULAR_UP	TURASHVILI_BREAST_CARCINOMA_DUCTAL_VS_LOBULAR_UP		19	0.409975	1.23006	0.217565	0.352353	1	3860	tags=37%, list=21%, signal=46%
YANG_BREAST_CANCER_ESR1_LASER_DN	YANG_BREAST_CANCER_ESR1_LASER_DN		49	0.34814	1.22846	0.219665	0.354141	1	3845	tags=35%, list=21%, signal=44%
UEDA_PERIFERAL_CLOCK	UEDA_PERIFERAL_CLOCK		162	0.286995	1.22838	0.161017	0.353882	1	5506	tags=42%, list=29%, signal=59%
REACTOME_ANTIGEN_PRESENTATION_FOLDING_ASSEMBLY_AND_PEPTIDE_LOADING_OF_CLASS_I_MHC	REACTOME_ANTIGEN_PRESENTATION_FOLDING_ASSEMBLY_AND_PEPTIDE_LOADING_OF_CLASS_I_MHC		20	0.478317	1.2283	0.279843	0.353629	1	4946	tags=60%, list=26%, signal=81%
PID_PS1_PATHWAY	PID_PS1_PATHWAY		46	0.343197	1.22665	0.19596	0.355472	1	7294	tags=59%, list=39%, signal=96%
WANG_ADIPOGENIC_GENES_REPRESSED_BY_SIRT1	WANG_ADIPOGENIC_GENES_REPRESSED_BY_SIRT1		26	0.408423	1.22663	0.241517	0.355143	1	2448	tags=38%, list=13%, signal=44%
ZHOU_TNF_SIGNALING_30MIN	ZHOU_TNF_SIGNALING_30MIN		51	0.382574	1.2266	0.256098	0.354819	1	5800	tags=57%, list=31%, signal=82%
HOFMANN_CELL_LYMPHOMA_UP	HOFMANN_CELL_LYMPHOMA_UP		46	0.330323	1.2254	0.211618	0.356097	1	4373	tags=41%, list=23%, signal=54%
HILLION_HMGA1B_TARGETS	HILLION_HMGA1B_TARGETS		89	0.326641	1.22494	0.211155	0.356304	1	5244	tags=46%, list=28%, signal=64%
REACTOME_TRAF6_MEDIATED_IRF7_ACTIVATION	REACTOME_TRAF6_MEDIATED_IRF7_ACTIVATION		19	0.411657	1.22447	0.239521	0.356524	1	5591	tags=42%, list=30%, signal=60%
BROWNE_HCMV_INFECTION_16HR_UP	BROWNE_HCMV_INFECTION_16HR_UP		217	0.290332	1.22347	0.201681	0.35749	1	5743	tags=44%, list=31%, signal=63%
SESTO_RESPONSE_TO_UV_C5	SESTO_RESPONSE_TO_UV_C5		46	0.403168	1.22318	0.251073	0.357487	1	5183	tags=46%, list=28%, signal=63%
BIOCARTA_HIF_PATHWAY	BIOCARTA_HIF_PATHWAY		15	0.429673	1.22246	0.21174	0.358077	1	4909	tags=53%, list=26%, signal=72%
RIZKI_TUMOR_INVASIVENESS_2D_DN	RIZKI_TUMOR_INVASIVENESS_2D_DN		60	0.306195	1.2211	0.202358	0.359507	1	3970	tags=37%, list=21%, signal=46%
REACTOME_FATTY_ACYL_COA_BIOSYNTHESIS	REACTOME_FATTY_ACYL_COA_BIOSYNTHESIS		18	0.429831	1.21968	0.235537	0.360971	1	4701	tags=50%, list=25%, signal=67%
BURTON_ADIPOGENESIS_6	BURTON_ADIPOGENESIS_6		179	0.322551	1.21959	0.231707	0.360742	1	5406	tags=49%, list=29%, signal=68%
REACTOME_DOWNREGULATION_OF_SMAD2_3_SMAD4_TRANSCRIPTIONAL_ACTIVITY	REACTOME_DOWNREGULATION_OF_SMAD2_3_SMAD4_TRANSCRIPTIONAL_ACTIVITY		19	0.427041	1.21924	0.253608	0.360823	1	7532	tags=63%, list=40%, signal=106%
MOREIRA_RESPONSE_TO_TSA_UP	MOREIRA_RESPONSE_TO_TSA_UP		27	0.418644	1.21864	0.236626	0.36125	1	5364	tags=56%, list=29%, signal=78%
SEMENZA_HIF1_TARGETS	SEMENZA_HIF1_TARGETS		35	0.384754	1.2166	0.26078	0.363646	1	2915	tags=31%, list=16%, signal=37%
NICK_RESPONSE_TO_PROC_TREATMENT_DN	NICK_RESPONSE_TO_PROC_TREATMENT_DN		24	0.395539	1.21658	0.240084	0.363309	1	7554	tags=58%, list=40%, signal=98%
SABATES_COLORECTAL_ADENOMA_SIZE_UP	SABATES_COLORECTAL_ADENOMA_SIZE_UP		16	0.415745	1.21609	0.219959	0.363583	1	1180	tags=25%, list=6%, signal=27%
REACTOME_PPARA_ACTIVATES_GENE_EXPRESSION	REACTOME_PPARA_ACTIVATES_GENE_EXPRESSION		103	0.292009	1.21517	0.178645	0.364425	1	5966	tags=46%, list=32%, signal=67%
EPPERT_LSC_R	EPPERT_LSC_R		37	0.355401	1.2146	0.242857	0.364803	1	6358	tags=54%, list=34%, signal=82%
PID_ECADHERIN_NASCENT_AJ_PATHWAY	PID_ECADHERIN_NASCENT_AJ_PATHWAY		38	0.350122	1.21369	0.211499	0.365669	1	3617	tags=39%, list=19%, signal=49%
BRUINS_UVC_RESPONSE_EARLY_LATE	BRUINS_UVC_RESPONSE_EARLY_LATE		292	0.266569	1.21355	0.174946	0.365505	1	4869	tags=38%, list=26%, signal=51%
MARSHALL_VIRAL_INFECTION_RESPONSE_DN	MARSHALL_VIRAL_INFECTION_RESPONSE_DN		29	0.386284	1.21352	0.235908	0.365175	1	570	tags=17%, list=3%, signal=18%
REACTOME_METABOLISM_OF_LIPIDS_AND_LIPOPROTEINS	REACTOME_METABOLISM_OF_LIPIDS_AND_LIPOPROTEINS		460	0.261522	1.21342	0.1606	0.364956	1	6184	tags=42%, list=33%, signal=61%
REACTOME_ACTIVATION_OF_BH3_ONLY_PROTEINS	REACTOME_ACTIVATION_OF_BH3_ONLY_PROTEINS		16	0.450534	1.21298	0.259023	0.365193	1	5979	tags=69%, list=32%, signal=101%
WAKABAYASHI_ADIPOGENESIS_PPARG_RXRA_BOUND_36HR	WAKABAYASHI_ADIPOGENESIS_PPARG_RXRA_BOUND_36HR		142	0.269287	1.21156	0.163561	0.366776	1	4198	tags=33%, list=22%, signal=42%
DORSAM_HOXA9_TARGETS_UP	DORSAM_HOXA9_TARGETS_UP		35	0.36022	1.21106	0.240664	0.367082	1	5965	tags=60%, list=32%, signal=88%
COLINA_TARGETS_OF_4EBP1_AND_4EBP2	COLINA_TARGETS_OF_4EBP1_AND_4EBP2		346	0.257945	1.21079	0.201613	0.367087	1	3022	tags=27%, list=16%, signal=32%
BOCHKIS_FOXA2_TARGETS	BOCHKIS_FOXA2_TARGETS		404	0.257085	1.20923	0.160083	0.368805	1	6052	tags=42%, list=32%, signal=60%
KIM_GASTRIC_CANCER_CHEMOSENSITIVITY	KIM_GASTRIC_CANCER_CHEMOSENSITIVITY		96	0.285792	1.20732	0.191919	0.370941	1	4881	tags=39%, list=26%, signal=52%
BROWNE_HCMV_INFECTION_2HR_DN	BROWNE_HCMV_INFECTION_2HR_DN		49	0.340418	1.20603	0.230126	0.372286	1	4241	tags=35%, list=23%, signal=45%
GUTIERREZ_MULTIPLE_MYELOMA_UP	GUTIERREZ_MULTIPLE_MYELOMA_UP		29	0.40801	1.20552	0.281947	0.372606	1	5939	tags=62%, list=32%, signal=91%
REACTOME_EGFR_DOWNREGULATION	REACTOME_EGFR_DOWNREGULATION		24	0.400549	1.20437	0.239085	0.373799	1	7153	tags=67%, list=38%, signal=108%
WANG_CLIM2_TARGETS_UP	WANG_CLIM2_TARGETS_UP		218	0.263108	1.20292	0.179541	0.3754	1	4560	tags=32%, list=24%, signal=42%
LANG_MYB_FAMILY_TARGETS	LANG_MYB_FAMILY_TARGETS		29	0.377266	1.20196	0.231707	0.376318	1	5035	tags=52%, list=27%, signal=71%
REACTOME_PHOSPHOLIPID_METABOLISM	REACTOME_PHOSPHOLIPID_METABOLISM		188	0.273402	1.20127	0.188017	0.376902	1	6595	tags=45%, list=35%, signal=68%
WEIGEL_OXIDATIVE_STRESS_BY_TBH_AND_H2O2	WEIGEL_OXIDATIVE_STRESS_BY_TBH_AND_H2O2		36	0.358913	1.20063	0.233266	0.3774	1	2900	tags=36%, list=16%, signal=43%
SWEET_LUNG_CANCER_KRAS_UP	SWEET_LUNG_CANCER_KRAS_UP		468	0.281977	1.19976	0.221053	0.378166	1	5473	tags=40%, list=29%, signal=55%
BIOCARTA_RELA_PATHWAY	BIOCARTA_RELA_PATHWAY		16	0.451031	1.19931	0.275304	0.378402	1	7239	tags=63%, list=39%, signal=102%
BIOCARTA_CERAMIDE_PATHWAY	BIOCARTA_CERAMIDE_PATHWAY		22	0.395851	1.19894	0.257028	0.378536	1	5371	tags=50%, list=29%, signal=70%
YIH_RESPONSE_TO_ARSENITE_C1	YIH_RESPONSE_TO_ARSENITE_C1		23	0.384169	1.19788	0.22766	0.379607	1	5099	tags=39%, list=27%, signal=54%
CEBALLOS_TARGETS_OF_TP53_AND_MYC_DN	CEBALLOS_TARGETS_OF_TP53_AND_MYC_DN		37	0.324709	1.1978	0.217021	0.379373	1	687	tags=19%, list=4%, signal=20%
SERVITJA_ISLET_HNF1A_TARGETS_DN	SERVITJA_ISLET_HNF1A_TARGETS_DN		105	0.313288	1.19626	0.233533	0.381152	1	5361	tags=38%, list=29%, signal=53%
SANA_RESPONSE_TO_IFNG_DN	SANA_RESPONSE_TO_IFNG_DN		81	0.351364	1.19609	0.287815	0.381014	1	3060	tags=42%, list=16%, signal=50%
REACTOME_INTERFERON_SIGNALING	REACTOME_INTERFERON_SIGNALING		141	0.335467	1.19562	0.267327	0.381318	1	4997	tags=35%, list=27%, signal=47%
SHETH_LIVER_CANCER_VS_TXNIP_LOSS_PAM1	SHETH_LIVER_CANCER_VS_TXNIP_LOSS_PAM1		221	0.261463	1.19514	0.183838	0.381593	1	5950	tags=43%, list=32%, signal=62%
YAGI_AML_SURVIVAL	YAGI_AML_SURVIVAL		119	0.271441	1.19258	0.192389	0.384702	1	3943	tags=34%, list=21%, signal=43%
PANGAS_TUMOR_SUPPRESSION_BY_SMAD1_AND_SMAD5_DN	PANGAS_TUMOR_SUPPRESSION_BY_SMAD1_AND_SMAD5_DN		142	0.259538	1.19143	0.2	0.385914	1	3997	tags=30%, list=21%, signal=38%
ALFANO_MYC_TARGETS	ALFANO_MYC_TARGETS		230	0.268987	1.191	0.20082	0.386136	1	3320	tags=30%, list=18%, signal=37%
LEE_CALORIE_RESTRICTION_NEOCORTEX_DN	LEE_CALORIE_RESTRICTION_NEOCORTEX_DN		85	0.295713	1.19027	0.223849	0.38678	1	4839	tags=39%, list=26%, signal=52%
KEGG_GLYCEROPHOSPHOLIPID_METABOLISM	KEGG_GLYCEROPHOSPHOLIPID_METABOLISM		71	0.29447	1.18975	0.203822	0.387139	1	7145	tags=51%, list=38%, signal=82%
QI_HYPOXIA_TARGETS_OF_HIF1A_AND_FOXA2	QI_HYPOXIA_TARGETS_OF_HIF1A_AND_FOXA2		36	0.363421	1.18955	0.266667	0.387049	1	3624	tags=47%, list=19%, signal=58%
LEE_CALORIE_RESTRICTION_NEOCORTEX_UP	LEE_CALORIE_RESTRICTION_NEOCORTEX_UP		82	0.272497	1.18834	0.180723	0.388279	1	2958	tags=26%, list=16%, signal=30%
KEGG_FATTY_ACID_METABOLISM	KEGG_FATTY_ACID_METABOLISM		42	0.376365	1.18809	0.264831	0.388237	1	6180	tags=55%, list=33%, signal=82%
WEIGEL_OXIDATIVE_STRESS_RESPONSE	WEIGEL_OXIDATIVE_STRESS_RESPONSE		34	0.349956	1.18759	0.23614	0.388529	1	5691	tags=47%, list=30%, signal=68%
KYNG_ENVIRONMENTAL_STRESS_RESPONSE_NOT_BY_GAMMA_IN_WS	KYNG_ENVIRONMENTAL_STRESS_RESPONSE_NOT_BY_GAMMA_IN_WS		32	0.334337	1.18735	0.225166	0.388487	1	6285	tags=59%, list=34%, signal=89%
REACTOME_METAL_ION_SLC_TRANSPORTERS	REACTOME_METAL_ION_SLC_TRANSPORTERS		22	0.390494	1.18631	0.227848	0.389526	1	7751	tags=59%, list=41%, signal=101%
BIOCARTA_PYK2_PATHWAY	BIOCARTA_PYK2_PATHWAY		28	0.369492	1.1863	0.268085	0.389171	1	6044	tags=46%, list=32%, signal=68%
HASLINGER_B_CLL_WITH_6Q21_DELETION	HASLINGER_B_CLL_WITH_6Q21_DELETION		18	0.421613	1.18613	0.277433	0.389034	1	6388	tags=56%, list=34%, signal=84%
PID_P38_MK2_PATHWAY	PID_P38_MK2_PATHWAY		21	0.388765	1.18586	0.254032	0.389031	1	4911	tags=43%, list=26%, signal=58%
RIZKI_TUMOR_INVASIVENESS_2D_UP	RIZKI_TUMOR_INVASIVENESS_2D_UP		66	0.298764	1.18516	0.220039	0.389623	1	6223	tags=48%, list=33%, signal=72%
HUANG_GATA2_TARGETS_DN	HUANG_GATA2_TARGETS_DN		67	0.298255	1.18498	0.2	0.3895	1	4237	tags=40%, list=23%, signal=52%
SHIN_B_CELL_LYMPHOMA_CLUSTER_8	SHIN_B_CELL_LYMPHOMA_CLUSTER_8		36	0.388805	1.18445	0.294979	0.389877	1	2921	tags=28%, list=16%, signal=33%
PID_LKB1_PATHWAY	PID_LKB1_PATHWAY		46	0.324064	1.18415	0.242739	0.389938	1	5294	tags=48%, list=28%, signal=67%
MULLIGHAN_NPM1_SIGNATURE_3_UP	MULLIGHAN_NPM1_SIGNATURE_3_UP		312	0.244148	1.18349	0.158537	0.39048	1	5454	tags=36%, list=29%, signal=50%
SCIBETTA_KDM5B_TARGETS_UP	SCIBETTA_KDM5B_TARGETS_UP		17	0.415203	1.18342	0.246809	0.390209	1	7717	tags=76%, list=41%, signal=130%
MARIADASON_RESPONSE_TO_CURCUMIN_SULINDAC_7	MARIADASON_RESPONSE_TO_CURCUMIN_SULINDAC_7		16	0.41875	1.18303	0.26096	0.39044	1	2548	tags=38%, list=14%, signal=43%
YEGNASUBRAMANIAN_PROSTATE_CANCER	YEGNASUBRAMANIAN_PROSTATE_CANCER		117	0.290206	1.1818	0.198745	0.391745	1	5210	tags=35%, list=28%, signal=48%
GUO_TARGETS_OF_IRS1_AND_IRS2	GUO_TARGETS_OF_IRS1_AND_IRS2		92	0.288202	1.18122	0.213983	0.392119	1	3037	tags=26%, list=16%, signal=31%
ACEVEDO_NORMAL_TISSUE_ADJACENT_TO_LIVER_TUMOR_UP	ACEVEDO_NORMAL_TISSUE_ADJACENT_TO_LIVER_TUMOR_UP		155	0.27928	1.18118	0.216387	0.39183	1	6957	tags=49%, list=37%, signal=77%
BHAT_ESR1_TARGETS_NOT_VIA_AKT1_UP	BHAT_ESR1_TARGETS_NOT_VIA_AKT1_UP		204	0.268398	1.18074	0.219262	0.392078	1	3490	tags=30%, list=19%, signal=36%
KEGG_PROGESTERONE_MEDIATED_OOCYTE_MATURATION	KEGG_PROGESTERONE_MEDIATED_OOCYTE_MATURATION		83	0.30176	1.17887	0.234568	0.39429	1	2813	tags=31%, list=15%, signal=37%
PID_FAS_PATHWAY	PID_FAS_PATHWAY		38	0.352796	1.17852	0.285714	0.394404	1	5925	tags=55%, list=32%, signal=81%
FONTAINE_PAPILLARY_THYROID_CARCINOMA_UP	FONTAINE_PAPILLARY_THYROID_CARCINOMA_UP		58	0.293123	1.17798	0.204593	0.394778	1	2565	tags=28%, list=14%, signal=32%
DELACROIX_RAR_BOUND_ES	DELACROIX_RAR_BOUND_ES		430	0.227578	1.17651	0.150905	0.396345	1	3990	tags=28%, list=21%, signal=35%
BROWNE_HCMV_INFECTION_20HR_UP	BROWNE_HCMV_INFECTION_20HR_UP		230	0.262448	1.17503	0.232848	0.397951	1	6256	tags=47%, list=33%, signal=70%
PID_NFAT_3PATHWAY	PID_NFAT_3PATHWAY		53	0.317485	1.17434	0.238956	0.398558	1	5371	tags=43%, list=29%, signal=61%
PID_ERB_GENOMIC_PATHWAY	PID_ERB_GENOMIC_PATHWAY		15	0.392825	1.17311	0.246377	0.399858	1	2859	tags=27%, list=15%, signal=31%
REACTOME_NOD1_2_SIGNALING_PATHWAY	REACTOME_NOD1_2_SIGNALING_PATHWAY		30	0.370783	1.17237	0.269397	0.400573	1	5671	tags=47%, list=30%, signal=67%
PID_ECADHERIN_KERATINOCYTE_PATHWAY	PID_ECADHERIN_KERATINOCYTE_PATHWAY		20	0.397137	1.17202	0.290526	0.400679	1	3617	tags=40%, list=19%, signal=50%
KAAB_HEART_ATRIUM_VS_VENTRICLE_DN	KAAB_HEART_ATRIUM_VS_VENTRICLE_DN		255	0.268141	1.17191	0.241309	0.400463	1	4397	tags=35%, list=24%, signal=45%
PID_ERA_GENOMIC_PATHWAY	PID_ERA_GENOMIC_PATHWAY		63	0.291555	1.17022	0.244094	0.402333	1	4931	tags=37%, list=26%, signal=49%
REACTOME_PKB_MEDIATED_EVENTS	REACTOME_PKB_MEDIATED_EVENTS		28	0.36113	1.16948	0.251546	0.403003	1	6041	tags=57%, list=32%, signal=84%
BOGNI_TREATMENT_RELATED_MYELOID_LEUKEMIA_UP	BOGNI_TREATMENT_RELATED_MYELOID_LEUKEMIA_UP		29	0.346215	1.16914	0.252446	0.40311	1	5244	tags=59%, list=28%, signal=81%
CHESLER_BRAIN_QTL_CIS	CHESLER_BRAIN_QTL_CIS		69	0.302871	1.1687	0.232506	0.403347	1	4712	tags=39%, list=25%, signal=52%
VANTVEER_BREAST_CANCER_POOR_PROGNOSIS	VANTVEER_BREAST_CANCER_POOR_PROGNOSIS		50	0.328555	1.16799	0.250996	0.403942	1	1771	tags=28%, list=9%, signal=31%
KEGG_GALACTOSE_METABOLISM	KEGG_GALACTOSE_METABOLISM		25	0.377901	1.16783	0.290581	0.40379	1	6619	tags=44%, list=35%, signal=68%
HOLLEMAN_ASPARAGINASE_RESISTANCE_ALL_UP	HOLLEMAN_ASPARAGINASE_RESISTANCE_ALL_UP		20	0.366275	1.16755	0.237603	0.403814	1	5286	tags=60%, list=28%, signal=84%
RIZ_ERYTHROID_DIFFERENTIATION_HBZ	RIZ_ERYTHROID_DIFFERENTIATION_HBZ		41	0.318384	1.1652	0.24498	0.40676	1	2079	tags=24%, list=11%, signal=27%
PID_PRL_SIGNALING_EVENTS_PATHWAY	PID_PRL_SIGNALING_EVENTS_PATHWAY		23	0.381216	1.16449	0.286275	0.407361	1	5371	tags=52%, list=29%, signal=73%
NIKOLSKY_BREAST_CANCER_16P13_AMPLICON	NIKOLSKY_BREAST_CANCER_16P13_AMPLICON		108	0.391063	1.16285	0.327451	0.409256	1	4639	tags=38%, list=25%, signal=50%
REACTOME_BASIGIN_INTERACTIONS	REACTOME_BASIGIN_INTERACTIONS		24	0.358702	1.16142	0.287474	0.410858	1	4823	tags=50%, list=26%, signal=67%
IWANAGA_CARCINOGENESIS_BY_KRAS_UP	IWANAGA_CARCINOGENESIS_BY_KRAS_UP		160	0.245888	1.16075	0.189542	0.411421	1	3583	tags=27%, list=19%, signal=33%
ZHAN_MULTIPLE_MYELOMA_UP	ZHAN_MULTIPLE_MYELOMA_UP		60	0.299627	1.16	0.250509	0.412086	1	2111	tags=28%, list=11%, signal=32%
LOPEZ_EPITHELIOID_MESOTHELIOMA	LOPEZ_EPITHELIOID_MESOTHELIOMA		16	0.411533	1.15974	0.285714	0.412069	1	1290	tags=25%, list=7%, signal=27%
DELLA_RESPONSE_TO_TSA_AND_BUTYRATE	DELLA_RESPONSE_TO_TSA_AND_BUTYRATE		20	0.3931	1.15862	0.277207	0.413294	1	7125	tags=65%, list=38%, signal=105%
JOHNSTONE_PARVB_TARGETS_2_DN	JOHNSTONE_PARVB_TARGETS_2_DN		315	0.302565	1.15845	0.301653	0.41315	1	5883	tags=49%, list=31%, signal=70%
PID_IL2_PI3K_PATHWAY	PID_IL2_PI3K_PATHWAY		34	0.355957	1.15834	0.263265	0.412912	1	4533	tags=35%, list=24%, signal=46%
PID_SMAD2_3PATHWAY	PID_SMAD2_3PATHWAY		17	0.426318	1.15705	0.318841	0.414369	1	6008	tags=47%, list=32%, signal=69%
AMIT_EGF_RESPONSE_120_MCF10A	AMIT_EGF_RESPONSE_120_MCF10A		41	0.363717	1.1566	0.292683	0.414584	1	7554	tags=71%, list=40%, signal=118%
GOTTWEIN_TARGETS_OF_KSHV_MIR_K12_11	GOTTWEIN_TARGETS_OF_KSHV_MIR_K12_11		62	0.289175	1.15595	0.248521	0.415184	1	3125	tags=27%, list=17%, signal=33%
SHIPP_DLBCL_CURED_VS_FATAL_DN	SHIPP_DLBCL_CURED_VS_FATAL_DN		42	0.302897	1.15548	0.269841	0.415462	1	6725	tags=57%, list=36%, signal=89%
REACTOME_RECYCLING_PATHWAY_OF_L1	REACTOME_RECYCLING_PATHWAY_OF_L1		26	0.360483	1.15547	0.293522	0.415097	1	3660	tags=42%, list=20%, signal=53%
LIANG_HEMATOPOIESIS_STEM_CELL_NUMBER_SMALL_VS_HUGE_UP	LIANG_HEMATOPOIESIS_STEM_CELL_NUMBER_SMALL_VS_HUGE_UP		37	0.335019	1.15542	0.280943	0.414772	1	2729	tags=27%, list=15%, signal=32%
BIOCARTA_ARF_PATHWAY	BIOCARTA_ARF_PATHWAY		17	0.379689	1.15492	0.288577	0.415084	1	4241	tags=47%, list=23%, signal=61%
KYNG_RESPONSE_TO_H2O2_VIA_ERCC6	KYNG_RESPONSE_TO_H2O2_VIA_ERCC6		17	0.398589	1.15486	0.307851	0.414792	1	5242	tags=53%, list=28%, signal=73%
HAHTOLA_MYCOSIS_FUNGOIDES_CD4_DN	HAHTOLA_MYCOSIS_FUNGOIDES_CD4_DN		109	0.324069	1.15393	0.301053	0.415786	1	5349	tags=46%, list=29%, signal=64%
OUYANG_PROSTATE_CANCER_MARKERS	OUYANG_PROSTATE_CANCER_MARKERS		19	0.353923	1.15323	0.253465	0.416422	1	1201	tags=21%, list=6%, signal=22%
DEBIASI_APOPTOSIS_BY_REOVIRUS_INFECTION_DN	DEBIASI_APOPTOSIS_BY_REOVIRUS_INFECTION_DN		277	0.281256	1.15222	0.280488	0.417431	1	3701	tags=34%, list=20%, signal=41%
AMIT_EGF_RESPONSE_480_HELA	AMIT_EGF_RESPONSE_480_HELA		156	0.314534	1.15111	0.283757	0.418607	1	3598	tags=30%, list=19%, signal=37%
BIOCARTA_TID_PATHWAY	BIOCARTA_TID_PATHWAY		19	0.414857	1.1511	0.300626	0.418254	1	5872	tags=42%, list=31%, signal=61%
CONCANNON_APOPTOSIS_BY_EPOXOMICIN_DN	CONCANNON_APOPTOSIS_BY_EPOXOMICIN_DN		159	0.277474	1.15046	0.291139	0.418776	1	3791	tags=36%, list=20%, signal=45%
KIM_WT1_TARGETS_8HR_DN	KIM_WT1_TARGETS_8HR_DN		115	0.254007	1.14984	0.21371	0.41926	1	4086	tags=29%, list=22%, signal=36%
CAMPS_COLON_CANCER_COPY_NUMBER_UP	CAMPS_COLON_CANCER_COPY_NUMBER_UP		78	0.298602	1.14902	0.256619	0.420045	1	3969	tags=26%, list=21%, signal=32%
BIOCARTA_CHREBP2_PATHWAY	BIOCARTA_CHREBP2_PATHWAY		41	0.324725	1.14866	0.271784	0.420175	1	4911	tags=49%, list=26%, signal=66%
BIOCARTA_MTA3_PATHWAY	BIOCARTA_MTA3_PATHWAY		19	0.382519	1.14842	0.280808	0.420139	1	1401	tags=32%, list=7%, signal=34%
OSMAN_BLADDER_CANCER_UP	OSMAN_BLADDER_CANCER_UP		383	0.287815	1.14696	0.294845	0.421769	1	5517	tags=41%, list=29%, signal=57%
DAZARD_RESPONSE_TO_UV_SCC_DN	DAZARD_RESPONSE_TO_UV_SCC_DN		119	0.289667	1.14598	0.264317	0.422749	1	6767	tags=52%, list=36%, signal=81%
REACTOME_GLUTATHIONE_CONJUGATION	REACTOME_GLUTATHIONE_CONJUGATION		22	0.402007	1.14471	0.300813	0.424094	1	4680	tags=50%, list=25%, signal=67%
DARWICHE_SKIN_TUMOR_PROMOTER_DN	DARWICHE_SKIN_TUMOR_PROMOTER_DN		168	0.242029	1.1432	0.204211	0.425827	1	2171	tags=19%, list=12%, signal=21%
BIOCARTA_MAL_PATHWAY	BIOCARTA_MAL_PATHWAY		19	0.386881	1.14313	0.285714	0.425553	1	6442	tags=58%, list=34%, signal=88%
REACTOME_SIGNALLING_TO_RAS	REACTOME_SIGNALLING_TO_RAS		27	0.349909	1.14308	0.285425	0.425232	1	5371	tags=48%, list=29%, signal=67%
REACTOME_SHC_MEDIATED_SIGNALLING	REACTOME_SHC_MEDIATED_SIGNALLING		15	0.394969	1.13928	0.315353	0.430203	1	5988	tags=53%, list=32%, signal=78%
REACTOME_DOWNREGULATION_OF_TGF_BETA_RECEPTOR_SIGNALING	REACTOME_DOWNREGULATION_OF_TGF_BETA_RECEPTOR_SIGNALING		21	0.376116	1.13572	0.327766	0.434988	1	3441	tags=33%, list=18%, signal=41%
ST_TUMOR_NECROSIS_FACTOR_PATHWAY	ST_TUMOR_NECROSIS_FACTOR_PATHWAY		29	0.367977	1.1342	0.298569	0.436786	1	5675	tags=48%, list=30%, signal=69%
WANG_BARRETTS_ESOPHAGUS_AND_ESOPHAGUS_CANCER_UP	WANG_BARRETTS_ESOPHAGUS_AND_ESOPHAGUS_CANCER_UP		26	0.371605	1.1332	0.325301	0.437848	1	5752	tags=54%, list=31%, signal=78%
PEDERSEN_METASTASIS_BY_ERBB2_ISOFORM_7	PEDERSEN_METASTASIS_BY_ERBB2_ISOFORM_7		362	0.234448	1.13301	0.246407	0.437713	1	2533	tags=20%, list=14%, signal=23%
GALLUZZI_PREVENT_MITOCHONDIAL_PERMEABILIZATION	GALLUZZI_PREVENT_MITOCHONDIAL_PERMEABILIZATION		22	0.379507	1.13131	0.313008	0.439744	1	2839	tags=36%, list=15%, signal=43%
JIANG_TIP30_TARGETS_DN	JIANG_TIP30_TARGETS_DN		23	0.379877	1.13018	0.332024	0.440989	1	4219	tags=43%, list=23%, signal=56%
BLALOCK_ALZHEIMERS_DISEASE_INCIPIENT_DN	BLALOCK_ALZHEIMERS_DISEASE_INCIPIENT_DN		161	0.281144	1.12943	0.300654	0.441652	1	5612	tags=45%, list=30%, signal=64%
DORN_ADENOVIRUS_INFECTION_24HR_DN	DORN_ADENOVIRUS_INFECTION_24HR_DN		43	0.34419	1.12801	0.322245	0.443281	1	3912	tags=30%, list=21%, signal=38%
JOHANSSON_GLIOMAGENESIS_BY_PDGFB_DN	JOHANSSON_GLIOMAGENESIS_BY_PDGFB_DN		21	0.358491	1.12788	0.277445	0.443108	1	1114	tags=14%, list=6%, signal=15%
KAAB_FAILED_HEART_ATRIUM_DN	KAAB_FAILED_HEART_ATRIUM_DN		136	0.289941	1.12709	0.305955	0.443849	1	2900	tags=30%, list=16%, signal=35%
RAY_TUMORIGENESIS_BY_ERBB2_CDC25A_UP	RAY_TUMORIGENESIS_BY_ERBB2_CDC25A_UP		101	0.256633	1.12658	0.226721	0.444229	1	3567	tags=27%, list=19%, signal=33%
WENG_POR_TARGETS_GLOBAL_DN	WENG_POR_TARGETS_GLOBAL_DN		23	0.350909	1.1265	0.301318	0.443947	1	5235	tags=52%, list=28%, signal=72%
DARWICHE_SQUAMOUS_CELL_CARCINOMA_UP	DARWICHE_SQUAMOUS_CELL_CARCINOMA_UP		133	0.26237	1.12587	0.263692	0.444483	1	4016	tags=29%, list=21%, signal=36%
NIKOLSKY_BREAST_CANCER_20Q11_AMPLICON	NIKOLSKY_BREAST_CANCER_20Q11_AMPLICON		28	0.425543	1.12579	0.362319	0.444198	1	3995	tags=39%, list=21%, signal=50%
GARGALOVIC_RESPONSE_TO_OXIDIZED_PHOSPHOLIPIDS_YELLOW_UP	GARGALOVIC_RESPONSE_TO_OXIDIZED_PHOSPHOLIPIDS_YELLOW_UP		31	0.372251	1.12446	0.308668	0.445701	1	5455	tags=48%, list=29%, signal=68%
BIOCARTA_PML_PATHWAY	BIOCARTA_PML_PATHWAY		17	0.394627	1.1244	0.309717	0.445416	1	2830	tags=24%, list=15%, signal=28%
PENG_LEUCINE_DEPRIVATION_UP	PENG_LEUCINE_DEPRIVATION_UP		133	0.274431	1.12299	0.258449	0.446989	1	5511	tags=37%, list=29%, signal=52%
BROWNE_HCMV_INFECTION_1HR_DN	BROWNE_HCMV_INFECTION_1HR_DN		208	0.226605	1.12078	0.231237	0.449806	1	5360	tags=36%, list=29%, signal=50%
PID_ARF6_DOWNSTREAM_PATHWAY	PID_ARF6_DOWNSTREAM_PATHWAY		15	0.408839	1.12039	0.329167	0.449991	1	6287	tags=53%, list=34%, signal=80%
REACTOME_MHC_CLASS_II_ANTIGEN_PRESENTATION	REACTOME_MHC_CLASS_II_ANTIGEN_PRESENTATION		88	0.294357	1.11833	0.326653	0.452684	1	4756	tags=33%, list=25%, signal=44%
DAZARD_RESPONSE_TO_UV_NHEK_UP	DAZARD_RESPONSE_TO_UV_NHEK_UP		232	0.27767	1.11815	0.304	0.452556	1	5651	tags=41%, list=30%, signal=57%
CADWELL_ATG16L1_TARGETS_DN	CADWELL_ATG16L1_TARGETS_DN		63	0.290115	1.11794	0.306288	0.452434	1	5618	tags=49%, list=30%, signal=70%
CHAUHAN_RESPONSE_TO_METHOXYESTRADIOL_DN	CHAUHAN_RESPONSE_TO_METHOXYESTRADIOL_DN		97	0.314919	1.11597	0.341948	0.454915	1	5698	tags=45%, list=30%, signal=65%
GARGALOVIC_RESPONSE_TO_OXIDIZED_PHOSPHOLIPIDS_YELLOW_DN	GARGALOVIC_RESPONSE_TO_OXIDIZED_PHOSPHOLIPIDS_YELLOW_DN		19	0.350772	1.11239	0.3147	0.459784	1	4084	tags=37%, list=22%, signal=47%
RICKMAN_METASTASIS_DN	RICKMAN_METASTASIS_DN		242	0.323249	1.11201	0.335341	0.45994	1	5794	tags=45%, list=31%, signal=64%
DOANE_RESPONSE_TO_ANDROGEN_UP	DOANE_RESPONSE_TO_ANDROGEN_UP		173	0.248557	1.1112	0.279919	0.460743	1	3350	tags=26%, list=18%, signal=31%
MULLIGHAN_NPM1_MUTATED_SIGNATURE_1_UP	MULLIGHAN_NPM1_MUTATED_SIGNATURE_1_UP		251	0.230235	1.10629	0.255489	0.467552	1	5513	tags=35%, list=29%, signal=48%
BIOCARTA_VEGF_PATHWAY	BIOCARTA_VEGF_PATHWAY		29	0.335879	1.10545	0.358763	0.468396	1	4909	tags=48%, list=26%, signal=65%
PID_P38_ALPHA_BETA_DOWNSTREAM_PATHWAY	PID_P38_ALPHA_BETA_DOWNSTREAM_PATHWAY		38	0.308304	1.10315	0.318367	0.471309	1	4447	tags=37%, list=24%, signal=48%
MCBRYAN_PUBERTAL_BREAST_5_6WK_UP	MCBRYAN_PUBERTAL_BREAST_5_6WK_UP		113	0.265023	1.10162	0.319149	0.473157	1	4775	tags=35%, list=26%, signal=47%
BIOCARTA_BCELLSURVIVAL_PATHWAY	BIOCARTA_BCELLSURVIVAL_PATHWAY		16	0.374349	1.10114	0.323232	0.473458	1	3423	tags=38%, list=18%, signal=46%
LEE_CALORIE_RESTRICTION_MUSCLE_DN	LEE_CALORIE_RESTRICTION_MUSCLE_DN		50	0.283226	1.09959	0.324153	0.475376	1	6223	tags=50%, list=33%, signal=75%
LIEN_BREAST_CARCINOMA_METAPLASTIC_VS_DUCTAL_DN	LIEN_BREAST_CARCINOMA_METAPLASTIC_VS_DUCTAL_DN		104	0.28265	1.0991	0.308642	0.475683	1	4612	tags=37%, list=25%, signal=48%
REACTOME_SYNTHESIS_OF_BILE_ACIDS_AND_BILE_SALTS_VIA_7ALPHA_HYDROXYCHOLESTEROL	REACTOME_SYNTHESIS_OF_BILE_ACIDS_AND_BILE_SALTS_VIA_7ALPHA_HYDROXYCHOLESTEROL		15	0.403218	1.09891	0.340551	0.475563	1	4394	tags=40%, list=23%, signal=52%
YAO_TEMPORAL_RESPONSE_TO_PROGESTERONE_CLUSTER_8	YAO_TEMPORAL_RESPONSE_TO_PROGESTERONE_CLUSTER_8		46	0.299477	1.09828	0.3107	0.476094	1	5946	tags=50%, list=32%, signal=73%
BIOCARTA_41BB_PATHWAY	BIOCARTA_41BB_PATHWAY		17	0.378361	1.09803	0.372781	0.476008	1	5311	tags=35%, list=28%, signal=49%
HOLLEMAN_VINCRISTINE_RESISTANCE_ALL_UP	HOLLEMAN_VINCRISTINE_RESISTANCE_ALL_UP		25	0.324113	1.09777	0.312871	0.475997	1	911	tags=20%, list=5%, signal=21%
NIKOLSKY_BREAST_CANCER_11Q12_Q14_AMPLICON	NIKOLSKY_BREAST_CANCER_11Q12_Q14_AMPLICON		144	0.318922	1.09758	0.351579	0.475854	1	4995	tags=38%, list=27%, signal=52%
CHEOK_RESPONSE_TO_MERCAPTOPURINE_AND_HD_MTX_DN	CHEOK_RESPONSE_TO_MERCAPTOPURINE_AND_HD_MTX_DN		21	0.336657	1.09569	0.33	0.478384	1	4840	tags=48%, list=26%, signal=64%
YOSHIMURA_MAPK8_TARGETS_DN	YOSHIMURA_MAPK8_TARGETS_DN		350	0.243096	1.09451	0.317172	0.479797	1	4764	tags=37%, list=25%, signal=49%
YAO_TEMPORAL_RESPONSE_TO_PROGESTERONE_CLUSTER_9	YAO_TEMPORAL_RESPONSE_TO_PROGESTERONE_CLUSTER_9		70	0.293974	1.09427	0.331384	0.479753	1	5571	tags=43%, list=30%, signal=61%
BAE_BRCA1_TARGETS_UP	BAE_BRCA1_TARGETS_UP		70	0.294237	1.09326	0.322718	0.480849	1	6664	tags=53%, list=36%, signal=82%
PETRETTO_HEART_MASS_QTL_CIS_UP	PETRETTO_HEART_MASS_QTL_CIS_UP		27	0.315672	1.09182	0.340956	0.482635	1	3489	tags=37%, list=19%, signal=45%
HOFFMANN_PRE_BI_TO_LARGE_PRE_BII_LYMPHOCYTE_UP	HOFFMANN_PRE_BI_TO_LARGE_PRE_BII_LYMPHOCYTE_UP		35	0.298996	1.09111	0.320792	0.483257	1	2494	tags=23%, list=13%, signal=26%
IIZUKA_LIVER_CANCER_PROGRESSION_L0_L1_DN	IIZUKA_LIVER_CANCER_PROGRESSION_L0_L1_DN		21	0.436563	1.09087	0.380567	0.483168	1	4463	tags=48%, list=24%, signal=62%
RIZKI_TUMOR_INVASIVENESS_3D_DN	RIZKI_TUMOR_INVASIVENESS_3D_DN		262	0.228966	1.09081	0.271222	0.482832	1	3711	tags=24%, list=20%, signal=30%
KEGG_APOPTOSIS	KEGG_APOPTOSIS		85	0.289978	1.09059	0.332016	0.482749	1	2487	tags=27%, list=13%, signal=31%
KEGG_PATHOGENIC_ESCHERICHIA_COLI_INFECTION	KEGG_PATHOGENIC_ESCHERICHIA_COLI_INFECTION		55	0.285012	1.0889	0.334615	0.484867	1	3500	tags=29%, list=19%, signal=36%
FARMER_BREAST_CANCER_CLUSTER_3	FARMER_BREAST_CANCER_CLUSTER_3		15	0.394118	1.08829	0.342	0.485394	1	2247	tags=27%, list=12%, signal=30%
CHEN_HOXA5_TARGETS_9HR_UP	CHEN_HOXA5_TARGETS_9HR_UP		209	0.291112	1.0874	0.353945	0.486349	1	6598	tags=51%, list=35%, signal=77%
JAZAG_TGFB1_SIGNALING_VIA_SMAD4_UP	JAZAG_TGFB1_SIGNALING_VIA_SMAD4_UP		101	0.261663	1.08731	0.298651	0.486074	1	3320	tags=26%, list=18%, signal=31%
GROSS_HYPOXIA_VIA_ELK3_ONLY_DN	GROSS_HYPOXIA_VIA_ELK3_ONLY_DN		41	0.295727	1.08611	0.325911	0.487463	1	2289	tags=24%, list=12%, signal=28%
BIOCARTA_P53_PATHWAY	BIOCARTA_P53_PATHWAY		16	0.373362	1.08582	0.348101	0.4875	1	2813	tags=38%, list=15%, signal=44%
DARWICHE_SKIN_TUMOR_PROMOTER_UP	DARWICHE_SKIN_TUMOR_PROMOTER_UP		129	0.248352	1.08554	0.317623	0.487522	1	3715	tags=28%, list=20%, signal=35%
REACTOME_SLC_MEDIATED_TRANSMEMBRANE_TRANSPORT	REACTOME_SLC_MEDIATED_TRANSMEMBRANE_TRANSPORT		238	0.244038	1.08515	0.313152	0.487679	1	3624	tags=22%, list=19%, signal=27%
ZHANG_BREAST_CANCER_PROGENITORS_DN	ZHANG_BREAST_CANCER_PROGENITORS_DN		139	0.238379	1.08476	0.287234	0.487813	1	4760	tags=35%, list=25%, signal=46%
ELLWOOD_MYC_TARGETS_DN	ELLWOOD_MYC_TARGETS_DN		38	0.326207	1.08287	0.380658	0.490281	1	6589	tags=53%, list=35%, signal=81%
LEI_MYB_TARGETS	LEI_MYB_TARGETS		309	0.260712	1.08278	0.346232	0.489999	1	3351	tags=29%, list=18%, signal=35%
ZHONG_SECRETOME_OF_LUNG_CANCER_AND_ENDOTHELIUM	ZHONG_SECRETOME_OF_LUNG_CANCER_AND_ENDOTHELIUM		65	0.303504	1.08218	0.373254	0.490525	1	2394	tags=32%, list=13%, signal=37%
REACTOME_LYSOSOME_VESICLE_BIOGENESIS	REACTOME_LYSOSOME_VESICLE_BIOGENESIS		23	0.373905	1.08204	0.391837	0.490304	1	6091	tags=57%, list=33%, signal=84%
FONTAINE_FOLLICULAR_THYROID_ADENOMA_UP	FONTAINE_FOLLICULAR_THYROID_ADENOMA_UP		69	0.265639	1.08172	0.322981	0.490356	1	5126	tags=42%, list=27%, signal=58%
RICKMAN_TUMOR_DIFFERENTIATED_MODERATELY_VS_POORLY_UP	RICKMAN_TUMOR_DIFFERENTIATED_MODERATELY_VS_POORLY_UP		114	0.265842	1.08106	0.319066	0.49089	1	2545	tags=25%, list=14%, signal=28%
FIRESTEIN_CTNNB1_PATHWAY	FIRESTEIN_CTNNB1_PATHWAY		32	0.329944	1.08097	0.383023	0.490626	1	1067	tags=19%, list=6%, signal=20%
DARWICHE_SQUAMOUS_CELL_CARCINOMA_DN	DARWICHE_SQUAMOUS_CELL_CARCINOMA_DN		164	0.223431	1.08008	0.296907	0.491554	1	3192	tags=23%, list=17%, signal=28%
DER_IFN_BETA_RESPONSE_UP	DER_IFN_BETA_RESPONSE_UP		101	0.317584	1.08007	0.37182	0.491162	1	3366	tags=31%, list=18%, signal=37%
SESTO_RESPONSE_TO_UV_C6	SESTO_RESPONSE_TO_UV_C6		38	0.333356	1.07946	0.366255	0.491658	1	3822	tags=34%, list=20%, signal=43%
KANG_FLUOROURACIL_RESISTANCE_UP	KANG_FLUOROURACIL_RESISTANCE_UP		21	0.331404	1.07812	0.33547	0.493265	1	3986	tags=38%, list=21%, signal=48%
NIKOLSKY_BREAST_CANCER_22Q13_AMPLICON	NIKOLSKY_BREAST_CANCER_22Q13_AMPLICON		16	0.446424	1.07777	0.406953	0.493385	1	6120	tags=56%, list=33%, signal=84%
CHEMNITZ_RESPONSE_TO_PROSTAGLANDIN_E2_DN	CHEMNITZ_RESPONSE_TO_PROSTAGLANDIN_E2_DN		341	0.243752	1.07765	0.336032	0.493139	1	5213	tags=36%, list=28%, signal=49%
KYNG_DNA_DAMAGE_BY_4NQO_OR_UV	KYNG_DNA_DAMAGE_BY_4NQO_OR_UV		63	0.27098	1.07643	0.34238	0.494546	1	3475	tags=32%, list=19%, signal=39%
LOPEZ_TRANSLATION_VIA_FN1_SIGNALING	LOPEZ_TRANSLATION_VIA_FN1_SIGNALING		34	0.310388	1.07586	0.347222	0.494991	1	3432	tags=38%, list=18%, signal=47%
SENESE_HDAC2_TARGETS_UP	SENESE_HDAC2_TARGETS_UP		107	0.293296	1.07572	0.358452	0.494754	1	3229	tags=28%, list=17%, signal=34%
KESHELAVA_MULTIPLE_DRUG_RESISTANCE	KESHELAVA_MULTIPLE_DRUG_RESISTANCE		75	0.284175	1.07553	0.356415	0.494646	1	5692	tags=39%, list=30%, signal=55%
PUIFFE_INVASION_INHIBITED_BY_ASCITES_DN	PUIFFE_INVASION_INHIBITED_BY_ASCITES_DN		141	0.278625	1.07487	0.352442	0.495249	1	6100	tags=49%, list=33%, signal=72%
WOOD_EBV_EBNA1_TARGETS_UP	WOOD_EBV_EBNA1_TARGETS_UP		109	0.265787	1.07463	0.354251	0.495239	1	3021	tags=25%, list=16%, signal=29%
FARMER_BREAST_CANCER_BASAL_VS_LULMINAL	FARMER_BREAST_CANCER_BASAL_VS_LULMINAL		317	0.227426	1.07438	0.329876	0.495227	1	4243	tags=31%, list=23%, signal=39%
REACTOME_GRB2_EVENTS_IN_ERBB2_SIGNALING	REACTOME_GRB2_EVENTS_IN_ERBB2_SIGNALING		22	0.336651	1.07299	0.364562	0.496871	1	8385	tags=68%, list=45%, signal=123%
BYSTRYKH_HEMATOPOIESIS_STEM_CELL_QTL_CIS	BYSTRYKH_HEMATOPOIESIS_STEM_CELL_QTL_CIS		110	0.258403	1.07086	0.349896	0.499719	1	6159	tags=46%, list=33%, signal=69%
BURTON_ADIPOGENESIS_12	BURTON_ADIPOGENESIS_12		31	0.3912	1.07005	0.408537	0.500573	1	5248	tags=48%, list=28%, signal=67%
GROSS_HIF1A_TARGETS_DN	GROSS_HIF1A_TARGETS_DN		23	0.357784	1.06901	0.379877	0.501729	1	5071	tags=39%, list=27%, signal=54%
GENTILE_UV_HIGH_DOSE_DN	GENTILE_UV_HIGH_DOSE_DN		301	0.25207	1.06896	0.327696	0.501381	1	4253	tags=33%, list=23%, signal=42%
PID_NFKAPPAB_CANONICAL_PATHWAY	PID_NFKAPPAB_CANONICAL_PATHWAY		23	0.362991	1.06876	0.393878	0.501294	1	5541	tags=43%, list=30%, signal=62%
MORI_PLASMA_CELL_UP	MORI_PLASMA_CELL_UP		49	0.356374	1.06848	0.396186	0.501294	1	5335	tags=47%, list=29%, signal=65%
CHEOK_RESPONSE_TO_MERCAPTOPURINE_AND_LD_MTX_DN	CHEOK_RESPONSE_TO_MERCAPTOPURINE_AND_LD_MTX_DN		18	0.3542	1.06797	0.358178	0.501652	1	2881	tags=22%, list=15%, signal=26%
HOUSTIS_ROS	HOUSTIS_ROS		36	0.343939	1.06732	0.379032	0.502232	1	3886	tags=39%, list=21%, signal=49%
MAGRANGEAS_MULTIPLE_MYELOMA_IGLL_VS_IGLK_UP	MAGRANGEAS_MULTIPLE_MYELOMA_IGLL_VS_IGLK_UP		41	0.279261	1.06562	0.364389	0.504369	1	6379	tags=56%, list=34%, signal=85%
JIANG_AGING_CEREBRAL_CORTEX_DN	JIANG_AGING_CEREBRAL_CORTEX_DN		53	0.292947	1.06519	0.363071	0.504576	1	4864	tags=38%, list=26%, signal=51%
BROWNE_HCMV_INFECTION_12HR_UP	BROWNE_HCMV_INFECTION_12HR_UP		104	0.261309	1.06516	0.35518	0.504197	1	6048	tags=38%, list=32%, signal=57%
REACTOME_TIGHT_JUNCTION_INTERACTIONS	REACTOME_TIGHT_JUNCTION_INTERACTIONS		27	0.332972	1.06437	0.368098	0.505009	1	3413	tags=30%, list=18%, signal=36%
ROY_WOUND_BLOOD_VESSEL_DN	ROY_WOUND_BLOOD_VESSEL_DN		22	0.366497	1.06392	0.381857	0.50527	1	4337	tags=41%, list=23%, signal=53%
BOYAULT_LIVER_CANCER_SUBCLASS_G6_DN	BOYAULT_LIVER_CANCER_SUBCLASS_G6_DN		18	0.362213	1.063	0.386221	0.506252	1	6957	tags=67%, list=37%, signal=106%
PROVENZANI_METASTASIS_DN	PROVENZANI_METASTASIS_DN		133	0.282544	1.05964	0.370526	0.510936	1	5337	tags=42%, list=29%, signal=58%
PID_AJDISS_2PATHWAY	PID_AJDISS_2PATHWAY		48	0.289463	1.05881	0.355372	0.511856	1	3617	tags=29%, list=19%, signal=36%
GAVIN_IL2_RESPONSIVE_FOXP3_TARGETS_UP	GAVIN_IL2_RESPONSIVE_FOXP3_TARGETS_UP		18	0.352078	1.05832	0.375	0.512201	1	2664	tags=28%, list=14%, signal=32%
ROME_INSULIN_TARGETS_IN_MUSCLE_UP	ROME_INSULIN_TARGETS_IN_MUSCLE_UP		407	0.260643	1.05763	0.382664	0.512848	1	5005	tags=40%, list=27%, signal=53%
SESTO_RESPONSE_TO_UV_C8	SESTO_RESPONSE_TO_UV_C8		70	0.289828	1.05712	0.383197	0.513215	1	5327	tags=40%, list=28%, signal=56%
LEE_LIVER_CANCER_MYC_TGFA_UP	LEE_LIVER_CANCER_MYC_TGFA_UP		60	0.28062	1.05573	0.379798	0.51486	1	2318	tags=22%, list=12%, signal=25%
NOJIMA_SFRP2_TARGETS_DN	NOJIMA_SFRP2_TARGETS_DN		23	0.350394	1.05541	0.389691	0.514966	1	5099	tags=39%, list=27%, signal=54%
YAO_TEMPORAL_RESPONSE_TO_PROGESTERONE_CLUSTER_4	YAO_TEMPORAL_RESPONSE_TO_PROGESTERONE_CLUSTER_4		15	0.356135	1.05489	0.421053	0.515357	1	3521	tags=47%, list=19%, signal=57%
ZEMBUTSU_SENSITIVITY_TO_CISPLATIN	ZEMBUTSU_SENSITIVITY_TO_CISPLATIN		18	0.3569	1.05455	0.373757	0.515458	1	5723	tags=61%, list=31%, signal=88%
REACTOME_RIP_MEDIATED_NFKB_ACTIVATION_VIA_DAI	REACTOME_RIP_MEDIATED_NFKB_ACTIVATION_VIA_DAI		18	0.36901	1.05436	0.370518	0.515332	1	7155	tags=61%, list=38%, signal=99%
REACTOME_SHC_RELATED_EVENTS	REACTOME_SHC_RELATED_EVENTS		16	0.356439	1.05306	0.407787	0.516915	1	5988	tags=50%, list=32%, signal=73%
MAGRANGEAS_MULTIPLE_MYELOMA_IGG_VS_IGA_DN	MAGRANGEAS_MULTIPLE_MYELOMA_IGG_VS_IGA_DN		23	0.327645	1.05297	0.37422	0.516626	1	5250	tags=35%, list=28%, signal=48%
PID_HNF3B_PATHWAY	PID_HNF3B_PATHWAY		44	0.331001	1.05214	0.363636	0.517476	1	5002	tags=39%, list=27%, signal=53%
PURBEY_TARGETS_OF_CTBP1_AND_SATB1_UP	PURBEY_TARGETS_OF_CTBP1_AND_SATB1_UP		77	0.257607	1.05212	0.357282	0.517091	1	4558	tags=36%, list=24%, signal=48%
TURASHVILI_BREAST_DUCTAL_CARCINOMA_VS_LOBULAR_NORMAL_UP	TURASHVILI_BREAST_DUCTAL_CARCINOMA_VS_LOBULAR_NORMAL_UP		71	0.308594	1.05171	0.419831	0.517262	1	2285	tags=28%, list=12%, signal=32%
ACEVEDO_FGFR1_TARGETS_IN_PROSTATE_CANCER_MODEL_UP	ACEVEDO_FGFR1_TARGETS_IN_PROSTATE_CANCER_MODEL_UP		274	0.241401	1.05007	0.360887	0.519357	1	5721	tags=39%, list=31%, signal=55%
KEGG_ANTIGEN_PROCESSING_AND_PRESENTATION	KEGG_ANTIGEN_PROCESSING_AND_PRESENTATION		68	0.362027	1.04977	0.418146	0.519406	1	5320	tags=34%, list=28%, signal=47%
FORTSCHEGGER_PHF8_TARGETS_UP	FORTSCHEGGER_PHF8_TARGETS_UP		250	0.222818	1.04827	0.373333	0.521306	1	5436	tags=38%, list=29%, signal=53%
HASLINGER_B_CLL_WITH_17P13_DELETION	HASLINGER_B_CLL_WITH_17P13_DELETION		20	0.366917	1.04753	0.41502	0.521967	1	3258	tags=35%, list=17%, signal=42%
GARGALOVIC_RESPONSE_TO_OXIDIZED_PHOSPHOLIPIDS_BLUE_UP	GARGALOVIC_RESPONSE_TO_OXIDIZED_PHOSPHOLIPIDS_BLUE_UP		119	0.264892	1.04593	0.359408	0.523991	1	6706	tags=48%, list=36%, signal=74%
KEGG_OTHER_GLYCAN_DEGRADATION	KEGG_OTHER_GLYCAN_DEGRADATION		16	0.376696	1.04563	0.411178	0.524084	1	7787	tags=50%, list=42%, signal=86%
NATSUME_RESPONSE_TO_INTERFERON_BETA_DN	NATSUME_RESPONSE_TO_INTERFERON_BETA_DN		52	0.319814	1.04474	0.412245	0.525027	1	4911	tags=42%, list=26%, signal=57%
LEE_METASTASIS_AND_ALTERNATIVE_SPLICING_DN	LEE_METASTASIS_AND_ALTERNATIVE_SPLICING_DN		45	0.26987	1.04404	0.377483	0.52573	1	5879	tags=40%, list=31%, signal=58%
BOUDOUKHA_BOUND_BY_IGF2BP2	BOUDOUKHA_BOUND_BY_IGF2BP2		103	0.273284	1.04327	0.404	0.526497	1	5509	tags=50%, list=29%, signal=70%
JACKSON_DNMT1_TARGETS_UP	JACKSON_DNMT1_TARGETS_UP		74	0.2709	1.04149	0.373984	0.528815	1	4022	tags=31%, list=21%, signal=39%
BIOCARTA_RARRXR_PATHWAY	BIOCARTA_RARRXR_PATHWAY		15	0.378374	1.0405	0.415254	0.529875	1	5881	tags=60%, list=31%, signal=87%
SCHAEFFER_PROSTATE_DEVELOPMENT_AND_CANCER_BOX1_UP	SCHAEFFER_PROSTATE_DEVELOPMENT_AND_CANCER_BOX1_UP		15	0.372673	1.03956	0.418259	0.53088	1	3165	tags=47%, list=17%, signal=56%
CHEOK_RESPONSE_TO_HD_MTX_DN	CHEOK_RESPONSE_TO_HD_MTX_DN		24	0.35002	1.038	0.451271	0.532913	1	7377	tags=67%, list=39%, signal=110%
GRESHOCK_CANCER_COPY_NUMBER_UP	GRESHOCK_CANCER_COPY_NUMBER_UP		313	0.233597	1.03791	0.379237	0.532648	1	3225	tags=25%, list=17%, signal=30%
GENTILE_UV_RESPONSE_CLUSTER_D4	GENTILE_UV_RESPONSE_CLUSTER_D4		54	0.300516	1.03767	0.389006	0.532599	1	2473	tags=26%, list=13%, signal=30%
REACTOME_TRANSCRIPTIONAL_REGULATION_OF_WHITE_ADIPOCYTE_DIFFERENTIATION	REACTOME_TRANSCRIPTIONAL_REGULATION_OF_WHITE_ADIPOCYTE_DIFFERENTIATION		71	0.269097	1.03706	0.382892	0.533093	1	5919	tags=48%, list=32%, signal=70%
REACTOME_PIP3_ACTIVATES_AKT_SIGNALING	REACTOME_PIP3_ACTIVATES_AKT_SIGNALING		27	0.324914	1.03683	0.416834	0.533026	1	4986	tags=37%, list=27%, signal=50%
COULOUARN_TEMPORAL_TGFB1_SIGNATURE_UP	COULOUARN_TEMPORAL_TGFB1_SIGNATURE_UP		107	0.260181	1.03665	0.376518	0.532882	1	4567	tags=34%, list=24%, signal=44%
PEDERSEN_METASTASIS_BY_ERBB2_ISOFORM_3	PEDERSEN_METASTASIS_BY_ERBB2_ISOFORM_3		17	0.363902	1.03616	0.396104	0.533241	1	3066	tags=29%, list=16%, signal=35%
REACTOME_ACYL_CHAIN_REMODELLING_OF_PG	REACTOME_ACYL_CHAIN_REMODELLING_OF_PG		16	0.374927	1.03363	0.39501	0.536655	1	6920	tags=50%, list=37%, signal=79%
REACTOME_AMYLOIDS	REACTOME_AMYLOIDS		77	0.335513	1.03318	0.434608	0.536931	1	5884	tags=42%, list=31%, signal=60%
PIONTEK_PKD1_TARGETS_DN	PIONTEK_PKD1_TARGETS_DN		17	0.35573	1.0327	0.415984	0.537246	1	2394	tags=29%, list=13%, signal=34%
PID_LIS1_PATHWAY	PID_LIS1_PATHWAY		28	0.315506	1.0312	0.40501	0.539139	1	3231	tags=36%, list=17%, signal=43%
KEGG_GLYCINE_SERINE_AND_THREONINE_METABOLISM	KEGG_GLYCINE_SERINE_AND_THREONINE_METABOLISM		31	0.331802	1.02984	0.408624	0.540859	1	1917	tags=23%, list=10%, signal=25%
MACLACHLAN_BRCA1_TARGETS_UP	MACLACHLAN_BRCA1_TARGETS_UP		21	0.360686	1.02881	0.447853	0.542105	1	4377	tags=48%, list=23%, signal=62%
KEGG_SNARE_INTERACTIONS_IN_VESICULAR_TRANSPORT	KEGG_SNARE_INTERACTIONS_IN_VESICULAR_TRANSPORT		38	0.299592	1.02878	0.418699	0.54173	1	6972	tags=55%, list=37%, signal=88%
WEIGEL_OXIDATIVE_STRESS_BY_HNE_AND_H2O2	WEIGEL_OXIDATIVE_STRESS_BY_HNE_AND_H2O2		39	0.289569	1.02878	0.434959	0.5413	1	5259	tags=49%, list=28%, signal=68%
PARK_HSC_VS_MULTIPOTENT_PROGENITORS_UP	PARK_HSC_VS_MULTIPOTENT_PROGENITORS_UP		18	0.339429	1.02764	0.408451	0.542766	1	5484	tags=61%, list=29%, signal=86%
STEIN_ESRRA_TARGETS_DN	STEIN_ESRRA_TARGETS_DN		97	0.24881	1.02763	0.40625	0.542364	1	4465	tags=35%, list=24%, signal=46%
REACTOME_TGF_BETA_RECEPTOR_SIGNALING_ACTIVATES_SMADS	REACTOME_TGF_BETA_RECEPTOR_SIGNALING_ACTIVATES_SMADS		24	0.334899	1.02683	0.448637	0.543203	1	3441	tags=29%, list=18%, signal=36%
YAO_TEMPORAL_RESPONSE_TO_PROGESTERONE_CLUSTER_12	YAO_TEMPORAL_RESPONSE_TO_PROGESTERONE_CLUSTER_12		77	0.281392	1.02673	0.439919	0.542915	1	6336	tags=55%, list=34%, signal=82%
GAZDA_DIAMOND_BLACKFAN_ANEMIA_MYELOID_UP	GAZDA_DIAMOND_BLACKFAN_ANEMIA_MYELOID_UP		28	0.319802	1.02529	0.419483	0.544776	1	4896	tags=46%, list=26%, signal=63%
ASTIER_INTEGRIN_SIGNALING	ASTIER_INTEGRIN_SIGNALING		56	0.255694	1.02298	0.411392	0.548003	1	3817	tags=27%, list=20%, signal=34%
GU_PDEF_TARGETS_DN	GU_PDEF_TARGETS_DN		38	0.308462	1.02167	0.415638	0.549544	1	4929	tags=45%, list=26%, signal=61%
NADLER_HYPERGLYCEMIA_AT_OBESITY	NADLER_HYPERGLYCEMIA_AT_OBESITY		56	0.269028	1.02128	0.425926	0.549755	1	2603	tags=23%, list=14%, signal=27%
MACAEVA_PBMC_RESPONSE_TO_IR	MACAEVA_PBMC_RESPONSE_TO_IR		90	0.274983	1.01894	0.408898	0.552975	1	3898	tags=28%, list=21%, signal=35%
LU_EZH2_TARGETS_DN	LU_EZH2_TARGETS_DN		356	0.230858	1.01832	0.396825	0.553532	1	4635	tags=33%, list=25%, signal=43%
REACTOME_N_GLYCAN_ANTENNAE_ELONGATION_IN_THE_MEDIAL_TRANS_GOLGI	REACTOME_N_GLYCAN_ANTENNAE_ELONGATION_IN_THE_MEDIAL_TRANS_GOLGI		18	0.344892	1.01727	0.433071	0.554813	1	6258	tags=50%, list=33%, signal=75%
POMEROY_MEDULLOBLASTOMA_DESMOPLASIC_VS_CLASSIC_UP	POMEROY_MEDULLOBLASTOMA_DESMOPLASIC_VS_CLASSIC_UP		58	0.259122	1.01722	0.425577	0.55446	1	4413	tags=34%, list=24%, signal=45%
XU_RESPONSE_TO_TRETINOIN_AND_NSC682994_UP	XU_RESPONSE_TO_TRETINOIN_AND_NSC682994_UP		16	0.380946	1.0172	0.447106	0.554043	1	531	tags=19%, list=3%, signal=19%
REACTOME_NEGATIVE_REGULATORS_OF_RIG_I_MDA5_SIGNALING	REACTOME_NEGATIVE_REGULATORS_OF_RIG_I_MDA5_SIGNALING		30	0.332418	1.01697	0.456175	0.553962	1	6737	tags=50%, list=36%, signal=78%
CAIRO_HEPATOBLASTOMA_UP	CAIRO_HEPATOBLASTOMA_UP		197	0.254436	1.01535	0.431772	0.556107	1	3305	tags=28%, list=18%, signal=34%
BIOCARTA_HSP27_PATHWAY	BIOCARTA_HSP27_PATHWAY		15	0.343082	1.01515	0.449416	0.555983	1	2487	tags=33%, list=13%, signal=38%
REACTOME_TRAF6_MEDIATED_NFKB_ACTIVATION	REACTOME_TRAF6_MEDIATED_NFKB_ACTIVATION		21	0.327704	1.01477	0.431138	0.556147	1	4545	tags=33%, list=24%, signal=44%
REACTOME_PHASE_II_CONJUGATION	REACTOME_PHASE_II_CONJUGATION		68	0.291049	1.01404	0.4158	0.556863	1	7243	tags=44%, list=39%, signal=72%
REACTOME_ACTIVATION_OF_CHAPERONE_GENES_BY_XBP1S	REACTOME_ACTIVATION_OF_CHAPERONE_GENES_BY_XBP1S		42	0.321503	1.01373	0.436992	0.556906	1	5914	tags=55%, list=32%, signal=80%
MUELLER_COMMON_TARGETS_OF_AML_FUSIONS_DN	MUELLER_COMMON_TARGETS_OF_AML_FUSIONS_DN		29	0.299768	1.01329	0.424242	0.557123	1	1597	tags=17%, list=9%, signal=19%
KRIEG_HYPOXIA_VIA_KDM3A	KRIEG_HYPOXIA_VIA_KDM3A		50	0.296991	1.01252	0.414079	0.557919	1	4018	tags=28%, list=21%, signal=36%
LIU_CMYB_TARGETS_UP	LIU_CMYB_TARGETS_UP		155	0.231515	1.01194	0.425	0.558369	1	6403	tags=43%, list=34%, signal=64%
WU_HBX_TARGETS_1_DN	WU_HBX_TARGETS_1_DN		22	0.30913	1.01175	0.431452	0.558242	1	3942	tags=32%, list=21%, signal=40%
NIKOLSKY_BREAST_CANCER_17Q21_Q25_AMPLICON	NIKOLSKY_BREAST_CANCER_17Q21_Q25_AMPLICON		312	0.25995	1.01164	0.410042	0.557971	1	6390	tags=44%, list=34%, signal=66%
SENESE_HDAC1_TARGETS_UP	SENESE_HDAC1_TARGETS_UP		424	0.249722	1.01097	0.411043	0.558593	1	5440	tags=39%, list=29%, signal=54%
LABBE_TARGETS_OF_TGFB1_AND_WNT3A_DN	LABBE_TARGETS_OF_TGFB1_AND_WNT3A_DN		105	0.243343	1.01016	0.427419	0.55943	1	4980	tags=34%, list=27%, signal=46%
YANG_BREAST_CANCER_ESR1_BULK_UP	YANG_BREAST_CANCER_ESR1_BULK_UP		25	0.312799	1.01003	0.452479	0.559202	1	5888	tags=48%, list=31%, signal=70%
BIOCARTA_KERATINOCYTE_PATHWAY	BIOCARTA_KERATINOCYTE_PATHWAY		46	0.293029	1.00981	0.441237	0.559102	1	5371	tags=35%, list=29%, signal=49%
REACTOME_SHC1_EVENTS_IN_ERBB4_SIGNALING	REACTOME_SHC1_EVENTS_IN_ERBB4_SIGNALING		20	0.328579	1.00808	0.403259	0.561473	1	5988	tags=40%, list=32%, signal=59%
BOYAULT_LIVER_CANCER_SUBCLASS_G1_DN	BOYAULT_LIVER_CANCER_SUBCLASS_G1_DN		39	0.302712	1.00636	0.42766	0.563776	1	4291	tags=41%, list=23%, signal=53%
KRIGE_AMINO_ACID_DEPRIVATION	KRIGE_AMINO_ACID_DEPRIVATION		28	0.354981	1.00627	0.443011	0.563467	1	7494	tags=61%, list=40%, signal=101%
RAMPON_ENRICHED_LEARNING_ENVIRONMENT_EARLY_UP	RAMPON_ENRICHED_LEARNING_ENVIRONMENT_EARLY_UP		15	0.346382	1.00601	0.469388	0.563453	1	1390	tags=27%, list=7%, signal=29%
REACTOME_TRIF_MEDIATED_TLR3_SIGNALING	REACTOME_TRIF_MEDIATED_TLR3_SIGNALING		72	0.268482	1.00547	0.444223	0.563881	1	5415	tags=42%, list=29%, signal=58%
KEGG_MATURITY_ONSET_DIABETES_OF_THE_YOUNG	KEGG_MATURITY_ONSET_DIABETES_OF_THE_YOUNG		24	0.360759	1.00493	0.436874	0.564304	1	2180	tags=21%, list=12%, signal=24%
REACTOME_SIGNALING_BY_CONSTITUTIVELY_ACTIVE_EGFR	REACTOME_SIGNALING_BY_CONSTITUTIVELY_ACTIVE_EGFR		17	0.330959	1.00353	0.462012	0.566106	1	3507	tags=29%, list=19%, signal=36%
YOSHIOKA_LIVER_CANCER_EARLY_RECURRENCE_UP	YOSHIOKA_LIVER_CANCER_EARLY_RECURRENCE_UP		37	0.288243	1.00239	0.446721	0.567483	1	2557	tags=22%, list=14%, signal=25%
NADLER_OBESITY_DN	NADLER_OBESITY_DN		48	0.29233	1.00214	0.443595	0.567449	1	4376	tags=40%, list=23%, signal=52%
HOLLMANN_APOPTOSIS_VIA_CD40_UP	HOLLMANN_APOPTOSIS_VIA_CD40_UP		189	0.252957	1.00105	0.434343	0.56871	1	4147	tags=31%, list=22%, signal=40%
GAZDA_DIAMOND_BLACKFAN_ANEMIA_ERYTHROID_DN	GAZDA_DIAMOND_BLACKFAN_ANEMIA_ERYTHROID_DN		460	0.197284	1.00035	0.43659	0.569342	1	6751	tags=43%, list=36%, signal=65%
AMIT_EGF_RESPONSE_120_HELA	AMIT_EGF_RESPONSE_120_HELA		66	0.291286	1.00014	0.453252	0.569245	1	7125	tags=53%, list=38%, signal=85%
HELLER_HDAC_TARGETS_DN	HELLER_HDAC_TARGETS_DN		276	0.233774	0.999816	0.451292	0.569327	1	2032	tags=19%, list=11%, signal=21%
MARTINEZ_RESPONSE_TO_TRABECTEDIN_UP	MARTINEZ_RESPONSE_TO_TRABECTEDIN_UP		67	0.29685	0.999284	0.443359	0.569739	1	6775	tags=52%, list=36%, signal=82%
VANDESLUIS_COMMD1_TARGETS_GROUP_4_UP	VANDESLUIS_COMMD1_TARGETS_GROUP_4_UP		19	0.400461	0.998621	0.487329	0.570362	1	1435	tags=16%, list=8%, signal=17%
RODWELL_AGING_KIDNEY_NO_BLOOD_DN	RODWELL_AGING_KIDNEY_NO_BLOOD_DN		141	0.254144	0.997049	0.445564	0.572393	1	5501	tags=43%, list=29%, signal=60%
BERTUCCI_INVASIVE_CARCINOMA_DUCTAL_VS_LOBULAR_UP	BERTUCCI_INVASIVE_CARCINOMA_DUCTAL_VS_LOBULAR_UP		22	0.317696	0.996913	0.42887	0.572152	1	7938	tags=77%, list=42%, signal=134%
PID_RETINOIC_ACID_PATHWAY	PID_RETINOIC_ACID_PATHWAY		30	0.300616	0.996005	0.456842	0.573174	1	5947	tags=47%, list=32%, signal=68%
TERAO_AOX4_TARGETS_HG_UP	TERAO_AOX4_TARGETS_HG_UP		28	0.315887	0.995403	0.472946	0.57366	1	5552	tags=43%, list=30%, signal=61%
JI_RESPONSE_TO_FSH_DN	JI_RESPONSE_TO_FSH_DN		57	0.295835	0.994711	0.477642	0.574296	1	4682	tags=40%, list=25%, signal=54%
FLOTHO_PEDIATRIC_ALL_THERAPY_RESPONSE_UP	FLOTHO_PEDIATRIC_ALL_THERAPY_RESPONSE_UP		53	0.312773	0.993497	0.434263	0.575787	1	6703	tags=66%, list=36%, signal=103%
HASLINGER_B_CLL_WITH_CHROMOSOME_12_TRISOMY	HASLINGER_B_CLL_WITH_CHROMOSOME_12_TRISOMY		22	0.328	0.992663	0.444215	0.576651	1	4863	tags=55%, list=26%, signal=74%
SHEDDEN_LUNG_CANCER_GOOD_SURVIVAL_A5	SHEDDEN_LUNG_CANCER_GOOD_SURVIVAL_A5		63	0.282147	0.992502	0.469548	0.576477	1	2724	tags=22%, list=15%, signal=26%
TARTE_PLASMA_CELL_VS_B_LYMPHOCYTE_UP	TARTE_PLASMA_CELL_VS_B_LYMPHOCYTE_UP		75	0.295509	0.992377	0.428858	0.57622	1	4897	tags=37%, list=26%, signal=50%
BIOCARTA_CDC42RAC_PATHWAY	BIOCARTA_CDC42RAC_PATHWAY		16	0.384066	0.991468	0.475	0.57723	1	6442	tags=75%, list=34%, signal=114%
PID_TNF_PATHWAY	PID_TNF_PATHWAY		45	0.289859	0.989547	0.475992	0.579951	1	2840	tags=24%, list=15%, signal=29%
LIM_MAMMARY_LUMINAL_MATURE_UP	LIM_MAMMARY_LUMINAL_MATURE_UP		104	0.244951	0.988766	0.451346	0.580785	1	4517	tags=31%, list=24%, signal=40%
JIANG_HYPOXIA_NORMAL	JIANG_HYPOXIA_NORMAL		296	0.219086	0.987449	0.448852	0.582401	1	5104	tags=35%, list=27%, signal=48%
HILLION_HMGA1_TARGETS	HILLION_HMGA1_TARGETS		86	0.258856	0.986998	0.468504	0.582693	1	3782	tags=33%, list=20%, signal=41%
BARRIER_COLON_CANCER_RECURRENCE_DN	BARRIER_COLON_CANCER_RECURRENCE_DN		20	0.331218	0.986296	0.472	0.583366	1	6017	tags=55%, list=32%, signal=81%
ROVERSI_GLIOMA_COPY_NUMBER_UP	ROVERSI_GLIOMA_COPY_NUMBER_UP		92	0.254958	0.98619	0.450199	0.583068	1	5652	tags=40%, list=30%, signal=57%
KEGG_AMYOTROPHIC_LATERAL_SCLEROSIS_ALS	KEGG_AMYOTROPHIC_LATERAL_SCLEROSIS_ALS		52	0.253116	0.985535	0.455446	0.58364	1	3715	tags=29%, list=20%, signal=36%
MARTORIATI_MDM4_TARGETS_FETAL_LIVER_UP	MARTORIATI_MDM4_TARGETS_FETAL_LIVER_UP		208	0.220389	0.985483	0.474468	0.583279	1	5979	tags=45%, list=32%, signal=66%
REACTOME_SIGNALLING_TO_ERKS	REACTOME_SIGNALLING_TO_ERKS		36	0.272094	0.984235	0.450397	0.58479	1	5371	tags=39%, list=29%, signal=54%
HUPER_BREAST_BASAL_VS_LUMINAL_DN	HUPER_BREAST_BASAL_VS_LUMINAL_DN		59	0.287447	0.983986	0.465347	0.584771	1	4558	tags=37%, list=24%, signal=49%
BIOCARTA_PITX2_PATHWAY	BIOCARTA_PITX2_PATHWAY		15	0.369658	0.983573	0.502024	0.58499	1	5919	tags=53%, list=32%, signal=78%
ZHOU_TNF_SIGNALING_4HR	ZHOU_TNF_SIGNALING_4HR		52	0.290054	0.983462	0.465447	0.584724	1	5062	tags=46%, list=27%, signal=63%
ZWANG_DOWN_BY_2ND_EGF_PULSE	ZWANG_DOWN_BY_2ND_EGF_PULSE		216	0.236412	0.982441	0.463768	0.585933	1	3902	tags=24%, list=21%, signal=30%
SMID_BREAST_CANCER_RELAPSE_IN_PLEURA_DN	SMID_BREAST_CANCER_RELAPSE_IN_PLEURA_DN		25	0.314446	0.981688	0.475904	0.586663	1	7048	tags=44%, list=38%, signal=70%
PID_AR_PATHWAY	PID_AR_PATHWAY		61	0.255549	0.981013	0.451143	0.587333	1	5919	tags=49%, list=32%, signal=72%
BYSTROEM_CORRELATED_WITH_IL5_DN	BYSTROEM_CORRELATED_WITH_IL5_DN		63	0.29475	0.977531	0.466527	0.592514	1	3897	tags=33%, list=21%, signal=42%
LEE_LIVER_CANCER_MYC_UP	LEE_LIVER_CANCER_MYC_UP		52	0.2665	0.977464	0.50297	0.592182	1	5946	tags=50%, list=32%, signal=73%
REACTOME_SYNTHESIS_OF_PA	REACTOME_SYNTHESIS_OF_PA		25	0.311025	0.976963	0.483333	0.592521	1	1590	tags=16%, list=8%, signal=17%
IVANOVA_HEMATOPOIESIS_STEM_CELL_SHORT_TERM	IVANOVA_HEMATOPOIESIS_STEM_CELL_SHORT_TERM		30	0.285813	0.975894	0.463563	0.593792	1	4311	tags=30%, list=23%, signal=39%
RUAN_RESPONSE_TO_TROGLITAZONE_DN	RUAN_RESPONSE_TO_TROGLITAZONE_DN		19	0.317838	0.974872	0.480885	0.594914	1	4026	tags=42%, list=22%, signal=54%
ADDYA_ERYTHROID_DIFFERENTIATION_BY_HEMIN	ADDYA_ERYTHROID_DIFFERENTIATION_BY_HEMIN		68	0.247038	0.973684	0.480084	0.596373	1	4087	tags=29%, list=22%, signal=37%
MARTORIATI_MDM4_TARGETS_NEUROEPITHELIUM_UP	MARTORIATI_MDM4_TARGETS_NEUROEPITHELIUM_UP		160	0.218394	0.973016	0.467066	0.597007	1	5268	tags=39%, list=28%, signal=53%
PURBEY_TARGETS_OF_CTBP1_NOT_SATB1_DN	PURBEY_TARGETS_OF_CTBP1_NOT_SATB1_DN		413	0.182552	0.971056	0.510246	0.599736	1	3556	tags=22%, list=19%, signal=26%
KAPOSI_LIVER_CANCER_MET_UP	KAPOSI_LIVER_CANCER_MET_UP		17	0.337283	0.970325	0.483936	0.600485	1	1874	tags=24%, list=10%, signal=26%
ZHOU_INFLAMMATORY_RESPONSE_LIVE_DN	ZHOU_INFLAMMATORY_RESPONSE_LIVE_DN		343	0.193846	0.969096	0.482213	0.60209	1	4427	tags=28%, list=24%, signal=36%
NUTT_GBM_VS_AO_GLIOMA_DN	NUTT_GBM_VS_AO_GLIOMA_DN		44	0.294992	0.966925	0.501002	0.605097	1	5422	tags=55%, list=29%, signal=77%
REACTOME_METABOLISM_OF_CARBOHYDRATES	REACTOME_METABOLISM_OF_CARBOHYDRATES		229	0.212215	0.966252	0.500986	0.605697	1	4397	tags=30%, list=24%, signal=39%
BIOCARTA_ACH_PATHWAY	BIOCARTA_ACH_PATHWAY		16	0.318558	0.96501	0.482422	0.607211	1	2222	tags=19%, list=12%, signal=21%
BIOCARTA_MPR_PATHWAY	BIOCARTA_MPR_PATHWAY		34	0.290808	0.963258	0.49497	0.609628	1	5371	tags=47%, list=29%, signal=66%
LEE_AGING_NEOCORTEX_DN	LEE_AGING_NEOCORTEX_DN		75	0.227078	0.963064	0.530242	0.609486	1	938	tags=13%, list=5%, signal=14%
DORSAM_HOXA9_TARGETS_DN	DORSAM_HOXA9_TARGETS_DN		32	0.268851	0.962332	0.50813	0.610201	1	6299	tags=41%, list=34%, signal=61%
LEE_CALORIE_RESTRICTION_MUSCLE_UP	LEE_CALORIE_RESTRICTION_MUSCLE_UP		40	0.27189	0.96049	0.508982	0.612792	1	4314	tags=38%, list=23%, signal=49%
MANTOVANI_VIRAL_GPCR_SIGNALING_DN	MANTOVANI_VIRAL_GPCR_SIGNALING_DN		47	0.242468	0.960076	0.533333	0.613016	1	2713	tags=26%, list=15%, signal=30%
PID_IGF1_PATHWAY	PID_IGF1_PATHWAY		29	0.293962	0.959522	0.492901	0.613502	1	2222	tags=24%, list=12%, signal=27%
KORKOLA_SEMINOMA_UP	KORKOLA_SEMINOMA_UP		40	0.329873	0.959302	0.485477	0.613407	1	3131	tags=25%, list=17%, signal=30%
MEISSNER_NPC_ICP_WITH_H3K4ME3	MEISSNER_NPC_ICP_WITH_H3K4ME3		16	0.322374	0.959008	0.504367	0.613466	1	6085	tags=63%, list=33%, signal=93%
REACTOME_ACYL_CHAIN_REMODELLING_OF_PE	REACTOME_ACYL_CHAIN_REMODELLING_OF_PE		21	0.313643	0.957609	0.504032	0.615293	1	6920	tags=52%, list=37%, signal=83%
HAHTOLA_CTCL_CUTANEOUS	HAHTOLA_CTCL_CUTANEOUS		25	0.302036	0.957594	0.519763	0.614851	1	3312	tags=32%, list=18%, signal=39%
BIOCARTA_TALL1_PATHWAY	BIOCARTA_TALL1_PATHWAY		15	0.354056	0.957594	0.49501	0.614393	1	5311	tags=40%, list=28%, signal=56%
REACTOME_ACYL_CHAIN_REMODELLING_OF_PS	REACTOME_ACYL_CHAIN_REMODELLING_OF_PS		15	0.352766	0.957469	0.522634	0.614136	1	6920	tags=47%, list=37%, signal=74%
ONDER_CDH1_TARGETS_2_DN	ONDER_CDH1_TARGETS_2_DN		447	0.249139	0.957167	0.474012	0.61417	1	5951	tags=36%, list=32%, signal=52%
REACTOME_SPHINGOLIPID_DE_NOVO_BIOSYNTHESIS	REACTOME_SPHINGOLIPID_DE_NOVO_BIOSYNTHESIS		27	0.295385	0.956857	0.52	0.614201	1	5701	tags=52%, list=30%, signal=74%
BANDRES_RESPONSE_TO_CARMUSTIN_MGMT_48HR_UP	BANDRES_RESPONSE_TO_CARMUSTIN_MGMT_48HR_UP		18	0.301788	0.956603	0.526639	0.614173	1	2733	tags=28%, list=15%, signal=32%
MULLIGHAN_MLL_SIGNATURE_2_UP	MULLIGHAN_MLL_SIGNATURE_2_UP		392	0.22458	0.956377	0.493069	0.614091	1	4186	tags=29%, list=22%, signal=37%
BAKER_HEMATOPOIESIS_STAT3_TARGETS	BAKER_HEMATOPOIESIS_STAT3_TARGETS		16	0.340871	0.956295	0.492986	0.613783	1	4241	tags=38%, list=23%, signal=48%
AMUNDSON_RESPONSE_TO_ARSENITE	AMUNDSON_RESPONSE_TO_ARSENITE		212	0.213315	0.956227	0.518047	0.613437	1	2975	tags=20%, list=16%, signal=24%
DIRMEIER_LMP1_RESPONSE_LATE_DN	DIRMEIER_LMP1_RESPONSE_LATE_DN		30	0.350084	0.954282	0.510978	0.616103	1	5491	tags=43%, list=29%, signal=61%
HWANG_PROSTATE_CANCER_MARKERS	HWANG_PROSTATE_CANCER_MARKERS		28	0.298621	0.953894	0.516667	0.616302	1	4814	tags=54%, list=26%, signal=72%
BARRIER_CANCER_RELAPSE_TUMOR_SAMPLE_UP	BARRIER_CANCER_RELAPSE_TUMOR_SAMPLE_UP		15	0.387106	0.953373	0.523404	0.616726	1	5704	tags=47%, list=30%, signal=67%
GRADE_COLON_VS_RECTAL_CANCER_DN	GRADE_COLON_VS_RECTAL_CANCER_DN		50	0.240609	0.950283	0.50101	0.621257	1	3068	tags=22%, list=16%, signal=26%
BROWNE_HCMV_INFECTION_30MIN_DN	BROWNE_HCMV_INFECTION_30MIN_DN		140	0.205993	0.95014	0.555336	0.621031	1	3125	tags=21%, list=17%, signal=25%
BIOCARTA_P53HYPOXIA_PATHWAY	BIOCARTA_P53HYPOXIA_PATHWAY		22	0.307794	0.948971	0.505197	0.622435	1	5311	tags=45%, list=28%, signal=63%
NIKOLSKY_BREAST_CANCER_20Q12_Q13_AMPLICON	NIKOLSKY_BREAST_CANCER_20Q12_Q13_AMPLICON		126	0.300163	0.948918	0.490722	0.622052	1	5763	tags=33%, list=31%, signal=48%
DER_IFN_GAMMA_RESPONSE_UP	DER_IFN_GAMMA_RESPONSE_UP		70	0.301204	0.948859	0.513026	0.621692	1	6180	tags=49%, list=33%, signal=72%
PID_HIF1_TFPATHWAY	PID_HIF1_TFPATHWAY		65	0.251839	0.948202	0.52008	0.622295	1	2915	tags=22%, list=16%, signal=25%
NIKOLSKY_BREAST_CANCER_7P22_AMPLICON	NIKOLSKY_BREAST_CANCER_7P22_AMPLICON		35	0.350748	0.947464	0.517857	0.623046	1	2412	tags=31%, list=13%, signal=36%
QI_HYPOXIA	QI_HYPOXIA		136	0.225907	0.947461	0.523517	0.622592	1	4314	tags=33%, list=23%, signal=43%
PID_ERBB1_INTERNALIZATION_PATHWAY	PID_ERBB1_INTERNALIZATION_PATHWAY		41	0.271597	0.947341	0.511387	0.622324	1	3763	tags=29%, list=20%, signal=37%
WENG_POR_TARGETS_LIVER_UP	WENG_POR_TARGETS_LIVER_UP		41	0.282125	0.947094	0.511111	0.622275	1	3521	tags=32%, list=19%, signal=39%
REACTOME_TRANSPORT_OF_VITAMINS_NUCLEOSIDES_AND_RELATED_MOLECULES	REACTOME_TRANSPORT_OF_VITAMINS_NUCLEOSIDES_AND_RELATED_MOLECULES		31	0.28056	0.946312	0.533058	0.623153	1	6200	tags=48%, list=33%, signal=72%
MUNSHI_MULTIPLE_MYELOMA_UP	MUNSHI_MULTIPLE_MYELOMA_UP		79	0.25035	0.946064	0.512922	0.623056	1	4309	tags=29%, list=23%, signal=38%
LEE_RECENT_THYMIC_EMIGRANT	LEE_RECENT_THYMIC_EMIGRANT		204	0.216759	0.94591	0.506356	0.622837	1	5438	tags=35%, list=29%, signal=49%
MILI_PSEUDOPODIA_CHEMOTAXIS_DN	MILI_PSEUDOPODIA_CHEMOTAXIS_DN		428	0.212628	0.945708	0.513131	0.622706	1	5503	tags=41%, list=29%, signal=56%
WELCH_GATA1_TARGETS	WELCH_GATA1_TARGETS		19	0.306314	0.945523	0.531317	0.62256	1	3282	tags=21%, list=18%, signal=26%
LANDEMAINE_LUNG_METASTASIS	LANDEMAINE_LUNG_METASTASIS		20	0.303455	0.944942	0.536688	0.622998	1	1878	tags=20%, list=10%, signal=22%
WIKMAN_ASBESTOS_LUNG_CANCER_UP	WIKMAN_ASBESTOS_LUNG_CANCER_UP		16	0.330296	0.943984	0.520325	0.624146	1	4967	tags=38%, list=27%, signal=51%
REACTOME_DIABETES_PATHWAYS	REACTOME_DIABETES_PATHWAYS		122	0.235543	0.941872	0.533881	0.627061	1	5702	tags=41%, list=30%, signal=59%
XU_CREBBP_TARGETS_DN	XU_CREBBP_TARGETS_DN		41	0.281528	0.941805	0.513026	0.626728	1	1908	tags=22%, list=10%, signal=24%
GENTILE_UV_RESPONSE_CLUSTER_D9	GENTILE_UV_RESPONSE_CLUSTER_D9		27	0.280889	0.941241	0.543569	0.627243	1	6557	tags=59%, list=35%, signal=91%
REACTOME_ACYL_CHAIN_REMODELLING_OF_PC	REACTOME_ACYL_CHAIN_REMODELLING_OF_PC		22	0.300715	0.940687	0.538618	0.627726	1	6920	tags=50%, list=37%, signal=79%
HUANG_DASATINIB_RESISTANCE_DN	HUANG_DASATINIB_RESISTANCE_DN		66	0.240245	0.937154	0.554435	0.632952	1	6588	tags=45%, list=35%, signal=70%
THEILGAARD_NEUTROPHIL_AT_SKIN_WOUND_UP	THEILGAARD_NEUTROPHIL_AT_SKIN_WOUND_UP		76	0.255519	0.936209	0.506986	0.634072	1	3577	tags=28%, list=19%, signal=34%
KEGG_NICOTINATE_AND_NICOTINAMIDE_METABOLISM	KEGG_NICOTINATE_AND_NICOTINAMIDE_METABOLISM		22	0.285773	0.935955	0.535211	0.634029	1	2849	tags=23%, list=15%, signal=27%
SHEN_SMARCA2_TARGETS_UP	SHEN_SMARCA2_TARGETS_UP		411	0.267219	0.935935	0.497951	0.6336	1	5916	tags=41%, list=32%, signal=58%
BILD_SRC_ONCOGENIC_SIGNATURE	BILD_SRC_ONCOGENIC_SIGNATURE		59	0.249198	0.934365	0.545833	0.635749	1	5826	tags=44%, list=31%, signal=64%
ZEMBUTSU_SENSITIVITY_TO_NIMUSTINE	ZEMBUTSU_SENSITIVITY_TO_NIMUSTINE		17	0.302532	0.934227	0.563265	0.635525	1	4381	tags=41%, list=23%, signal=54%
ABE_VEGFA_TARGETS_2HR	ABE_VEGFA_TARGETS_2HR		32	0.279287	0.933194	0.519348	0.636741	1	2237	tags=19%, list=12%, signal=21%
KANNAN_TP53_TARGETS_DN	KANNAN_TP53_TARGETS_DN		21	0.297243	0.931495	0.56405	0.639006	1	5752	tags=48%, list=31%, signal=69%
REACTOME_GAB1_SIGNALOSOME	REACTOME_GAB1_SIGNALOSOME		36	0.273794	0.931125	0.551308	0.63915	1	3615	tags=28%, list=19%, signal=34%
REACTOME_ACTIVATED_TAK1_MEDIATES_P38_MAPK_ACTIVATION	REACTOME_ACTIVATED_TAK1_MEDIATES_P38_MAPK_ACTIVATION		17	0.320613	0.929203	0.544	0.641822	1	5047	tags=35%, list=27%, signal=48%
REACTOME_REGULATION_OF_GENE_EXPRESSION_IN_BETA_CELLS	REACTOME_REGULATION_OF_GENE_EXPRESSION_IN_BETA_CELLS		19	0.327221	0.927775	0.544061	0.643638	1	2180	tags=26%, list=12%, signal=30%
PID_INSULIN_GLUCOSE_PATHWAY	PID_INSULIN_GLUCOSE_PATHWAY		25	0.275632	0.926711	0.540984	0.644889	1	2897	tags=28%, list=15%, signal=33%
KAYO_CALORIE_RESTRICTION_MUSCLE_DN	KAYO_CALORIE_RESTRICTION_MUSCLE_DN		81	0.231636	0.926296	0.542683	0.645093	1	4927	tags=33%, list=26%, signal=45%
BIOCARTA_BARRESTIN_SRC_PATHWAY	BIOCARTA_BARRESTIN_SRC_PATHWAY		15	0.324	0.924621	0.532653	0.647447	1	5371	tags=40%, list=29%, signal=56%
REACTOME_RORA_ACTIVATES_CIRCADIAN_EXPRESSION	REACTOME_RORA_ACTIVATES_CIRCADIAN_EXPRESSION		23	0.307307	0.923907	0.545455	0.648135	1	5088	tags=48%, list=27%, signal=66%
RODRIGUES_NTN1_AND_DCC_TARGETS	RODRIGUES_NTN1_AND_DCC_TARGETS		30	0.283504	0.922342	0.54334	0.650227	1	5965	tags=43%, list=32%, signal=64%
SASSON_RESPONSE_TO_FORSKOLIN_UP	SASSON_RESPONSE_TO_FORSKOLIN_UP		88	0.23365	0.922242	0.535497	0.649939	1	3520	tags=28%, list=19%, signal=35%
DAZARD_RESPONSE_TO_UV_NHEK_DN	DAZARD_RESPONSE_TO_UV_NHEK_DN		301	0.246922	0.92198	0.514344	0.649919	1	5557	tags=38%, list=30%, signal=53%
REACTOME_ACTIVATED_NOTCH1_TRANSMITS_SIGNAL_TO_THE_NUCLEUS	REACTOME_ACTIVATED_NOTCH1_TRANSMITS_SIGNAL_TO_THE_NUCLEUS		25	0.303745	0.921789	0.55625	0.649759	1	7119	tags=52%, list=38%, signal=84%
BROWNE_HCMV_INFECTION_8HR_DN	BROWNE_HCMV_INFECTION_8HR_DN		44	0.232532	0.921638	0.590361	0.649541	1	2846	tags=25%, list=15%, signal=29%
ZEMBUTSU_SENSITIVITY_TO_MITOMYCIN	ZEMBUTSU_SENSITIVITY_TO_MITOMYCIN		18	0.294592	0.921216	0.566462	0.649792	1	3475	tags=28%, list=19%, signal=34%
DORMOY_ELAVL1_TARGETS	DORMOY_ELAVL1_TARGETS		16	0.314649	0.920315	0.55642	0.650837	1	4130	tags=44%, list=22%, signal=56%
MURAKAMI_UV_RESPONSE_24HR	MURAKAMI_UV_RESPONSE_24HR		20	0.328114	0.920256	0.558091	0.650475	1	644	tags=15%, list=3%, signal=16%
BIOCARTA_ARAP_PATHWAY	BIOCARTA_ARAP_PATHWAY		17	0.325756	0.919742	0.539554	0.650854	1	7268	tags=71%, list=39%, signal=115%
QUINTENS_EMBRYONIC_BRAIN_RESPONSE_TO_IR	QUINTENS_EMBRYONIC_BRAIN_RESPONSE_TO_IR		75	0.226169	0.918209	0.599581	0.652869	1	5979	tags=40%, list=32%, signal=59%
WUNDER_INFLAMMATORY_RESPONSE_AND_CHOLESTEROL_UP	WUNDER_INFLAMMATORY_RESPONSE_AND_CHOLESTEROL_UP		56	0.296421	0.917481	0.54054	0.653572	1	5571	tags=34%, list=30%, signal=48%
REACTOME_REGULATION_OF_HYPOXIA_INDUCIBLE_FACTOR_HIF_BY_OXYGEN	REACTOME_REGULATION_OF_HYPOXIA_INDUCIBLE_FACTOR_HIF_BY_OXYGEN		21	0.289508	0.916643	0.597077	0.654465	1	6942	tags=52%, list=37%, signal=83%
PID_SMAD2_3NUCLEAR_PATHWAY	PID_SMAD2_3NUCLEAR_PATHWAY		80	0.23494	0.916235	0.578093	0.654626	1	5115	tags=33%, list=27%, signal=45%
REACTOME_PI_METABOLISM	REACTOME_PI_METABOLISM		47	0.274548	0.914873	0.552529	0.656457	1	4612	tags=34%, list=25%, signal=45%
BIOCARTA_AKAPCENTROSOME_PATHWAY	BIOCARTA_AKAPCENTROSOME_PATHWAY		15	0.302515	0.912871	0.574553	0.659203	1	4276	tags=47%, list=23%, signal=60%
RAO_BOUND_BY_SALL4_ISOFORM_B	RAO_BOUND_BY_SALL4_ISOFORM_B		484	0.18498	0.912387	0.607287	0.65958	1	4173	tags=25%, list=22%, signal=32%
REACTOME_TAK1_ACTIVATES_NFKB_BY_PHOSPHORYLATION_AND_ACTIVATION_OF_IKKS_COMPLEX	REACTOME_TAK1_ACTIVATES_NFKB_BY_PHOSPHORYLATION_AND_ACTIVATION_OF_IKKS_COMPLEX		23	0.285923	0.911529	0.560575	0.660563	1	7155	tags=52%, list=38%, signal=84%
AMIT_SERUM_RESPONSE_480_MCF10A	AMIT_SERUM_RESPONSE_480_MCF10A		34	0.291978	0.910773	0.557895	0.66133	1	5041	tags=47%, list=27%, signal=64%
GAZDA_DIAMOND_BLACKFAN_ANEMIA_MYELOID_DN	GAZDA_DIAMOND_BLACKFAN_ANEMIA_MYELOID_DN		36	0.268053	0.909844	0.576	0.662445	1	6739	tags=56%, list=36%, signal=87%
ZEMBUTSU_SENSITIVITY_TO_CYCLOPHOSPHAMIDE	ZEMBUTSU_SENSITIVITY_TO_CYCLOPHOSPHAMIDE		16	0.309363	0.90954	0.584615	0.662511	1	3196	tags=31%, list=17%, signal=38%
GEISS_RESPONSE_TO_DSRNA_UP	GEISS_RESPONSE_TO_DSRNA_UP		37	0.285363	0.909324	0.571717	0.662407	1	3510	tags=30%, list=19%, signal=37%
ZEMBUTSU_SENSITIVITY_TO_FLUOROURACIL	ZEMBUTSU_SENSITIVITY_TO_FLUOROURACIL		16	0.303632	0.909111	0.546748	0.662278	1	4950	tags=38%, list=26%, signal=51%
GHO_ATF5_TARGETS_DN	GHO_ATF5_TARGETS_DN		16	0.332439	0.908783	0.56785	0.662319	1	6536	tags=69%, list=35%, signal=106%
GRAESSMANN_APOPTOSIS_BY_SERUM_DEPRIVATION_DN	GRAESSMANN_APOPTOSIS_BY_SERUM_DEPRIVATION_DN		218	0.191681	0.90876	0.630303	0.661878	1	4720	tags=30%, list=25%, signal=40%
DUTTA_APOPTOSIS_VIA_NFKB	DUTTA_APOPTOSIS_VIA_NFKB		33	0.295232	0.904926	0.553279	0.667758	1	1646	tags=18%, list=9%, signal=20%
HU_ANGIOGENESIS_UP	HU_ANGIOGENESIS_UP		19	0.287084	0.904646	0.558522	0.667723	1	7372	tags=47%, list=39%, signal=78%
BROWNE_HCMV_INFECTION_6HR_UP	BROWNE_HCMV_INFECTION_6HR_UP		66	0.231969	0.902865	0.602	0.670241	1	1965	tags=17%, list=11%, signal=19%
KASLER_HDAC7_TARGETS_1_UP	KASLER_HDAC7_TARGETS_1_UP		187	0.222166	0.902824	0.563851	0.669833	1	4026	tags=30%, list=22%, signal=38%
PID_NOTCH_PATHWAY	PID_NOTCH_PATHWAY		58	0.242517	0.901385	0.584016	0.671715	1	6193	tags=45%, list=33%, signal=67%
KANG_CISPLATIN_RESISTANCE_UP	KANG_CISPLATIN_RESISTANCE_UP		17	0.32168	0.901333	0.574899	0.671321	1	3986	tags=29%, list=21%, signal=37%
AMIT_EGF_RESPONSE_480_MCF10A	AMIT_EGF_RESPONSE_480_MCF10A		40	0.257264	0.901182	0.584362	0.671095	1	5440	tags=45%, list=29%, signal=63%
KIM_HYPOXIA	KIM_HYPOXIA		25	0.305923	0.900778	0.56067	0.671293	1	4650	tags=36%, list=25%, signal=48%
COULOUARN_TEMPORAL_TGFB1_SIGNATURE_DN	COULOUARN_TEMPORAL_TGFB1_SIGNATURE_DN		128	0.216817	0.899582	0.576305	0.672805	1	3617	tags=26%, list=19%, signal=32%
KORKOLA_CORRELATED_WITH_POU5F1	KORKOLA_CORRELATED_WITH_POU5F1		31	0.272976	0.89933	0.570552	0.672755	1	4573	tags=29%, list=24%, signal=38%
PID_ECADHERIN_STABILIZATION_PATHWAY	PID_ECADHERIN_STABILIZATION_PATHWAY		40	0.274307	0.898819	0.565401	0.673144	1	3841	tags=38%, list=21%, signal=47%
PID_HDAC_CLASSII_PATHWAY	PID_HDAC_CLASSII_PATHWAY		33	0.264659	0.898729	0.606936	0.672806	1	5195	tags=48%, list=28%, signal=67%
REACTOME_TRANSFERRIN_ENDOCYTOSIS_AND_RECYCLING	REACTOME_TRANSFERRIN_ENDOCYTOSIS_AND_RECYCLING		25	0.291217	0.898295	0.568421	0.673043	1	2247	tags=20%, list=12%, signal=23%
BOYAULT_LIVER_CANCER_SUBCLASS_G12_UP	BOYAULT_LIVER_CANCER_SUBCLASS_G12_UP		37	0.288364	0.898028	0.550936	0.672995	1	3601	tags=27%, list=19%, signal=33%
AMIT_SERUM_RESPONSE_20_MCF10A	AMIT_SERUM_RESPONSE_20_MCF10A		20	0.280482	0.897261	0.603696	0.673776	1	4309	tags=35%, list=23%, signal=45%
MULLIGHAN_NPM1_MUTATED_SIGNATURE_2_DN	MULLIGHAN_NPM1_MUTATED_SIGNATURE_2_DN		72	0.245629	0.897048	0.594433	0.67365	1	4284	tags=38%, list=23%, signal=48%
MAEKAWA_ATF2_TARGETS	MAEKAWA_ATF2_TARGETS		23	0.274763	0.896875	0.616326	0.673472	1	1274	tags=13%, list=7%, signal=14%
LEE_LIVER_CANCER_MYC_E2F1_UP	LEE_LIVER_CANCER_MYC_E2F1_UP		56	0.244167	0.89626	0.613726	0.674025	1	2318	tags=18%, list=12%, signal=20%
KYNG_WERNER_SYNDROM_DN	KYNG_WERNER_SYNDROM_DN		26	0.270872	0.89624	0.604651	0.673584	1	6457	tags=42%, list=35%, signal=65%
SU_LIVER	SU_LIVER		53	0.323038	0.895909	0.64741	0.673684	1	9393	tags=62%, list=50%, signal=125%
REACTOME_SIGNALLING_TO_P38_VIA_RIT_AND_RIN	REACTOME_SIGNALLING_TO_P38_VIA_RIT_AND_RIN		15	0.289586	0.895735	0.58502	0.67348	1	5371	tags=47%, list=29%, signal=65%
ZWANG_EGF_INTERVAL_UP	ZWANG_EGF_INTERVAL_UP		85	0.218604	0.894273	0.665306	0.675425	1	4668	tags=27%, list=25%, signal=36%
DEBIASI_APOPTOSIS_BY_REOVIRUS_INFECTION_UP	DEBIASI_APOPTOSIS_BY_REOVIRUS_INFECTION_UP		303	0.221578	0.893052	0.529915	0.676926	1	4646	tags=30%, list=25%, signal=39%
DOUGLAS_BMI1_TARGETS_DN	DOUGLAS_BMI1_TARGETS_DN		300	0.199812	0.892482	0.612632	0.677387	1	4609	tags=30%, list=25%, signal=39%
VANTVEER_BREAST_CANCER_ESR1_UP	VANTVEER_BREAST_CANCER_ESR1_UP		159	0.211484	0.891937	0.579167	0.677794	1	4621	tags=33%, list=25%, signal=43%
HOWLIN_CITED1_TARGETS_2_DN	HOWLIN_CITED1_TARGETS_2_DN		16	0.30333	0.891604	0.613821	0.67787	1	6762	tags=56%, list=36%, signal=88%
OUILLETTE_CLL_13Q14_DELETION_UP	OUILLETTE_CLL_13Q14_DELETION_UP		69	0.229417	0.889941	0.588477	0.680148	1	5999	tags=42%, list=32%, signal=62%
MEINHOLD_OVARIAN_CANCER_LOW_GRADE_UP	MEINHOLD_OVARIAN_CANCER_LOW_GRADE_UP		18	0.309441	0.889533	0.561866	0.68036	1	5739	tags=44%, list=31%, signal=64%
KEGG_INOSITOL_PHOSPHATE_METABOLISM	KEGG_INOSITOL_PHOSPHATE_METABOLISM		54	0.244085	0.88942	0.609375	0.680097	1	4724	tags=31%, list=25%, signal=42%
DAZARD_UV_RESPONSE_CLUSTER_G6	DAZARD_UV_RESPONSE_CLUSTER_G6		142	0.244462	0.888635	0.569647	0.680924	1	2297	tags=22%, list=12%, signal=25%
ST_G_ALPHA_I_PATHWAY	ST_G_ALPHA_I_PATHWAY		35	0.25115	0.888139	0.620278	0.681309	1	2419	tags=20%, list=13%, signal=23%
THEILGAARD_NEUTROPHIL_AT_SKIN_WOUND_DN	THEILGAARD_NEUTROPHIL_AT_SKIN_WOUND_DN		222	0.212458	0.887205	0.579798	0.682343	1	2696	tags=22%, list=14%, signal=25%
ST_B_CELL_ANTIGEN_RECEPTOR	ST_B_CELL_ANTIGEN_RECEPTOR		40	0.276684	0.886932	0.571713	0.682331	1	5988	tags=45%, list=32%, signal=66%
ZHANG_PROLIFERATING_VS_QUIESCENT	ZHANG_PROLIFERATING_VS_QUIESCENT		49	0.263484	0.885749	0.578	0.683801	1	2487	tags=27%, list=13%, signal=31%
FINETTI_BREAST_CANCERS_KINOME_BLUE	FINETTI_BREAST_CANCERS_KINOME_BLUE		21	0.289894	0.884741	0.603922	0.684961	1	5828	tags=52%, list=31%, signal=76%
MEISSNER_ES_ICP_WITH_H3K4ME3	MEISSNER_ES_ICP_WITH_H3K4ME3		30	0.246155	0.883492	0.628631	0.686512	1	5083	tags=43%, list=27%, signal=59%
BANDRES_RESPONSE_TO_CARMUSTIN_WITHOUT_MGMT_48HR_UP	BANDRES_RESPONSE_TO_CARMUSTIN_WITHOUT_MGMT_48HR_UP		18	0.281486	0.883398	0.60241	0.686202	1	3159	tags=28%, list=17%, signal=33%
KEGG_NOTCH_SIGNALING_PATHWAY	KEGG_NOTCH_SIGNALING_PATHWAY		47	0.244652	0.882102	0.616495	0.687903	1	6193	tags=45%, list=33%, signal=67%
BILANGES_SERUM_SENSITIVE_VIA_TSC2	BILANGES_SERUM_SENSITIVE_VIA_TSC2		38	0.259158	0.88197	0.608163	0.687607	1	4474	tags=37%, list=24%, signal=48%
TIEN_INTESTINE_PROBIOTICS_6HR_DN	TIEN_INTESTINE_PROBIOTICS_6HR_DN		158	0.207478	0.881877	0.608961	0.687292	1	6368	tags=44%, list=34%, signal=67%
BIOCARTA_CK1_PATHWAY	BIOCARTA_CK1_PATHWAY		17	0.285112	0.8812	0.6417	0.687925	1	3832	tags=35%, list=20%, signal=44%
PID_HES_HEY_PATHWAY	PID_HES_HEY_PATHWAY		48	0.23917	0.878443	0.61245	0.692007	1	4880	tags=35%, list=26%, signal=48%
BILD_CTNNB1_ONCOGENIC_SIGNATURE	BILD_CTNNB1_ONCOGENIC_SIGNATURE		75	0.249834	0.876951	0.598326	0.693973	1	5126	tags=37%, list=27%, signal=51%
LIU_IL13_MEMORY_MODEL_UP	LIU_IL13_MEMORY_MODEL_UP		16	0.306606	0.876621	0.626016	0.694012	1	7252	tags=44%, list=39%, signal=71%
YANG_BREAST_CANCER_ESR1_LASER_UP	YANG_BREAST_CANCER_ESR1_LASER_UP		30	0.261146	0.875839	0.612705	0.694859	1	6074	tags=50%, list=32%, signal=74%
KEGG_ENDOCYTOSIS	KEGG_ENDOCYTOSIS		176	0.198064	0.875694	0.622984	0.694626	1	6605	tags=42%, list=35%, signal=64%
KEGG_RIG_I_LIKE_RECEPTOR_SIGNALING_PATHWAY	KEGG_RIG_I_LIKE_RECEPTOR_SIGNALING_PATHWAY		56	0.234065	0.875648	0.612121	0.694231	1	6724	tags=39%, list=36%, signal=61%
NGUYEN_NOTCH1_TARGETS_DN	NGUYEN_NOTCH1_TARGETS_DN		85	0.212728	0.869574	0.618557	0.703752	1	4727	tags=35%, list=25%, signal=47%
CHUANG_OXIDATIVE_STRESS_RESPONSE_UP	CHUANG_OXIDATIVE_STRESS_RESPONSE_UP		27	0.25875	0.868497	0.650526	0.705029	1	6771	tags=59%, list=36%, signal=93%
WEI_MIR34A_TARGETS	WEI_MIR34A_TARGETS		141	0.210999	0.86665	0.647541	0.707595	1	3944	tags=27%, list=21%, signal=34%
MYLLYKANGAS_AMPLIFICATION_HOT_SPOT_23	MYLLYKANGAS_AMPLIFICATION_HOT_SPOT_23		18	0.320978	0.866193	0.59	0.707885	1	2581	tags=28%, list=14%, signal=32%
FLECHNER_PBL_KIDNEY_TRANSPLANT_OK_VS_DONOR_DN	FLECHNER_PBL_KIDNEY_TRANSPLANT_OK_VS_DONOR_DN		40	0.247758	0.865248	0.63278	0.708978	1	4366	tags=38%, list=23%, signal=49%
MATZUK_IMPLANTATION_AND_UTERINE	MATZUK_IMPLANTATION_AND_UTERINE		22	0.256591	0.862427	0.670808	0.713126	1	1949	tags=23%, list=10%, signal=25%
RASHI_NFKB1_TARGETS	RASHI_NFKB1_TARGETS		19	0.322647	0.862112	0.599589	0.713182	1	5671	tags=47%, list=30%, signal=68%
KEGG_EPITHELIAL_CELL_SIGNALING_IN_HELICOBACTER_PYLORI_INFECTION	KEGG_EPITHELIAL_CELL_SIGNALING_IN_HELICOBACTER_PYLORI_INFECTION		67	0.215597	0.861712	0.644958	0.713379	1	5439	tags=37%, list=29%, signal=52%
SASSON_RESPONSE_TO_GONADOTROPHINS_UP	SASSON_RESPONSE_TO_GONADOTROPHINS_UP		88	0.218288	0.860805	0.63655	0.714359	1	3633	tags=30%, list=19%, signal=36%
BIOCARTA_TFF_PATHWAY	BIOCARTA_TFF_PATHWAY		21	0.271223	0.859615	0.635644	0.715817	1	3126	tags=29%, list=17%, signal=34%
ANDERSEN_LIVER_CANCER_KRT19_DN	ANDERSEN_LIVER_CANCER_KRT19_DN		74	0.252886	0.858869	0.638298	0.716588	1	5239	tags=32%, list=28%, signal=45%
CHESLER_BRAIN_HIGHEST_EXPRESSION	CHESLER_BRAIN_HIGHEST_EXPRESSION		36	0.24856	0.8584	0.67086	0.716881	1	4741	tags=36%, list=25%, signal=48%
PID_PI3K_PLC_TRK_PATHWAY	PID_PI3K_PLC_TRK_PATHWAY		36	0.238673	0.858327	0.642424	0.716514	1	4911	tags=36%, list=26%, signal=49%
ZHANG_GATA6_TARGETS_DN	ZHANG_GATA6_TARGETS_DN		60	0.218379	0.857499	0.709474	0.717397	1	3808	tags=28%, list=20%, signal=35%
CARDOSO_RESPONSE_TO_GAMMA_RADIATION_AND_3AB	CARDOSO_RESPONSE_TO_GAMMA_RADIATION_AND_3AB		16	0.281711	0.857444	0.645291	0.717013	1	1852	tags=19%, list=10%, signal=21%
DACOSTA_LOW_DOSE_UV_RESPONSE_VIA_ERCC3_XPCS_UP	DACOSTA_LOW_DOSE_UV_RESPONSE_VIA_ERCC3_XPCS_UP		16	0.283708	0.857117	0.682353	0.717067	1	2234	tags=19%, list=12%, signal=21%
REACTOME_SIGNALING_BY_NOTCH1	REACTOME_SIGNALING_BY_NOTCH1		67	0.218665	0.85704	0.701863	0.716704	1	7244	tags=49%, list=39%, signal=80%
PID_EPHB_FWD_PATHWAY	PID_EPHB_FWD_PATHWAY		40	0.238804	0.855804	0.627016	0.71824	1	6442	tags=48%, list=34%, signal=72%
LUND_SILENCED_BY_METHYLATION	LUND_SILENCED_BY_METHYLATION		15	0.296345	0.855487	0.667387	0.718315	1	6957	tags=67%, list=37%, signal=106%
REACTOME_SIGNALING_BY_NOTCH	REACTOME_SIGNALING_BY_NOTCH		95	0.209083	0.855307	0.679167	0.718118	1	5366	tags=36%, list=29%, signal=50%
KEGG_VIBRIO_CHOLERAE_INFECTION	KEGG_VIBRIO_CHOLERAE_INFECTION		52	0.224606	0.855163	0.662526	0.717845	1	7881	tags=52%, list=42%, signal=89%
WELCSH_BRCA1_TARGETS_UP	WELCSH_BRCA1_TARGETS_UP		192	0.214724	0.8549	0.635983	0.717805	1	4735	tags=34%, list=25%, signal=46%
KEGG_PENTOSE_AND_GLUCURONATE_INTERCONVERSIONS	KEGG_PENTOSE_AND_GLUCURONATE_INTERCONVERSIONS		27	0.299869	0.854862	0.638075	0.717374	1	7024	tags=41%, list=38%, signal=65%
PID_HIF2PATHWAY	PID_HIF2PATHWAY		32	0.243934	0.854474	0.661479	0.717529	1	3540	tags=28%, list=19%, signal=35%
BROWNE_HCMV_INFECTION_10HR_DN	BROWNE_HCMV_INFECTION_10HR_DN		53	0.223663	0.852663	0.676829	0.719976	1	1783	tags=17%, list=10%, signal=19%
FINETTI_BREAST_CANCERS_KINOME_GRAY	FINETTI_BREAST_CANCERS_KINOME_GRAY		15	0.364118	0.852343	0.597585	0.720017	1	6902	tags=60%, list=37%, signal=95%
RAMPON_ENRICHED_LEARNING_ENVIRONMENT_LATE_UP	RAMPON_ENRICHED_LEARNING_ENVIRONMENT_LATE_UP		21	0.282123	0.851701	0.677355	0.720529	1	4496	tags=38%, list=24%, signal=50%
RASHI_RESPONSE_TO_IONIZING_RADIATION_1	RASHI_RESPONSE_TO_IONIZING_RADIATION_1		42	0.241213	0.851295	0.645669	0.720699	1	2910	tags=24%, list=16%, signal=28%
MENSE_HYPOXIA_UP	MENSE_HYPOXIA_UP		93	0.228465	0.849822	0.641791	0.7226	1	5978	tags=39%, list=32%, signal=57%
PID_REG_GR_PATHWAY	PID_REG_GR_PATHWAY		80	0.207487	0.848477	0.714286	0.724336	1	5371	tags=35%, list=29%, signal=49%
DER_IFN_ALPHA_RESPONSE_UP	DER_IFN_ALPHA_RESPONSE_UP		73	0.2747	0.847751	0.60198	0.725052	1	3887	tags=30%, list=21%, signal=38%
PID_IFNG_PATHWAY	PID_IFNG_PATHWAY		40	0.256599	0.847495	0.646341	0.725015	1	7232	tags=45%, list=39%, signal=73%
STAMBOLSKY_TARGETS_OF_MUTATED_TP53_UP	STAMBOLSKY_TARGETS_OF_MUTATED_TP53_UP		47	0.223235	0.847193	0.687243	0.725024	1	4874	tags=34%, list=26%, signal=46%
WAGNER_APO2_SENSITIVITY	WAGNER_APO2_SENSITIVITY		22	0.281851	0.846326	0.646694	0.725938	1	6367	tags=41%, list=34%, signal=62%
DACOSTA_UV_RESPONSE_VIA_ERCC3_COMMON_DN	DACOSTA_UV_RESPONSE_VIA_ERCC3_COMMON_DN		467	0.237	0.846251	0.601266	0.725564	1	3735	tags=29%, list=20%, signal=35%
PID_DELTA_NP63_PATHWAY	PID_DELTA_NP63_PATHWAY		45	0.239533	0.843335	0.694444	0.729859	1	4487	tags=27%, list=24%, signal=35%
STEARMAN_LUNG_CANCER_EARLY_VS_LATE_UP	STEARMAN_LUNG_CANCER_EARLY_VS_LATE_UP		119	0.205353	0.840947	0.67418	0.733372	1	6283	tags=43%, list=34%, signal=64%
PID_A6B1_A6B4_INTEGRIN_PATHWAY	PID_A6B1_A6B4_INTEGRIN_PATHWAY		46	0.240835	0.840812	0.657787	0.733118	1	3322	tags=28%, list=18%, signal=34%
PENG_GLUTAMINE_DEPRIVATION_UP	PENG_GLUTAMINE_DEPRIVATION_UP		38	0.249013	0.840787	0.666667	0.732675	1	5308	tags=32%, list=28%, signal=44%
AKL_HTLV1_INFECTION_UP	AKL_HTLV1_INFECTION_UP		24	0.268681	0.840731	0.644068	0.73227	1	6729	tags=54%, list=36%, signal=84%
TURASHVILI_BREAST_NORMAL_DUCTAL_VS_LOBULAR_UP	TURASHVILI_BREAST_NORMAL_DUCTAL_VS_LOBULAR_UP		60	0.224545	0.840185	0.710921	0.732656	1	2696	tags=22%, list=14%, signal=25%
CHIARETTI_ACUTE_LYMPHOBLASTIC_LEUKEMIA_ZAP70	CHIARETTI_ACUTE_LYMPHOBLASTIC_LEUKEMIA_ZAP70		59	0.214147	0.838255	0.688889	0.735277	1	4272	tags=29%, list=23%, signal=37%
OLSSON_E2F3_TARGETS_UP	OLSSON_E2F3_TARGETS_UP		25	0.255277	0.838156	0.693359	0.734964	1	4161	tags=36%, list=22%, signal=46%
BILD_HRAS_ONCOGENIC_SIGNATURE	BILD_HRAS_ONCOGENIC_SIGNATURE		242	0.208131	0.838122	0.639752	0.734529	1	6055	tags=41%, list=32%, signal=60%
PASINI_SUZ12_TARGETS_UP	PASINI_SUZ12_TARGETS_UP		105	0.187091	0.837785	0.78499	0.734569	1	6360	tags=39%, list=34%, signal=59%
BIOCARTA_GSK3_PATHWAY	BIOCARTA_GSK3_PATHWAY		27	0.270263	0.837608	0.656566	0.734375	1	5257	tags=48%, list=28%, signal=67%
REACTOME_TRAF6_MEDIATED_INDUCTION_OF_NFKB_AND_MAP_KINASES_UPON_TLR7_8_OR_9_ACTIVATION	REACTOME_TRAF6_MEDIATED_INDUCTION_OF_NFKB_AND_MAP_KINASES_UPON_TLR7_8_OR_9_ACTIVATION		75	0.220333	0.837588	0.676587	0.73393	1	5371	tags=37%, list=29%, signal=52%
KEGG_GLYCOSPHINGOLIPID_BIOSYNTHESIS_LACTO_AND_NEOLACTO_SERIES	KEGG_GLYCOSPHINGOLIPID_BIOSYNTHESIS_LACTO_AND_NEOLACTO_SERIES		24	0.254073	0.836389	0.681275	0.735377	1	6471	tags=50%, list=35%, signal=76%
MARTENS_BOUND_BY_PML_RARA_FUSION	MARTENS_BOUND_BY_PML_RARA_FUSION		414	0.192656	0.835667	0.669276	0.736004	1	6033	tags=41%, list=32%, signal=59%
VANLOO_SP3_TARGETS_DN	VANLOO_SP3_TARGETS_DN		82	0.222215	0.834497	0.703629	0.737454	1	5485	tags=37%, list=29%, signal=52%
IVANOVA_HEMATOPOIESIS_MATURE_CELL	IVANOVA_HEMATOPOIESIS_MATURE_CELL		263	0.179856	0.834195	0.743271	0.737476	1	5434	tags=33%, list=29%, signal=46%
BIOCARTA_STATHMIN_PATHWAY	BIOCARTA_STATHMIN_PATHWAY		19	0.287778	0.83313	0.633397	0.738821	1	1441	tags=21%, list=8%, signal=23%
MULLIGHAN_MLL_SIGNATURE_1_UP	MULLIGHAN_MLL_SIGNATURE_1_UP		354	0.197788	0.832668	0.664032	0.739075	1	4186	tags=28%, list=22%, signal=35%
TOMLINS_METASTASIS_DN	TOMLINS_METASTASIS_DN		19	0.276866	0.830726	0.648033	0.741715	1	6763	tags=42%, list=36%, signal=66%
ZHENG_RESPONSE_TO_ARSENITE_UP	ZHENG_RESPONSE_TO_ARSENITE_UP		18	0.295817	0.829477	0.638945	0.743251	1	7551	tags=61%, list=40%, signal=102%
FISCHER_DIRECT_P53_TARGETS_META_ANALYSIS	FISCHER_DIRECT_P53_TARGETS_META_ANALYSIS		288	0.186461	0.828654	0.722815	0.744099	1	3121	tags=20%, list=17%, signal=23%
REACTOME_SIGNALING_BY_SCF_KIT	REACTOME_SIGNALING_BY_SCF_KIT		75	0.223433	0.82768	0.696356	0.745146	1	3917	tags=25%, list=21%, signal=32%
HEIDENBLAD_AMPLIFIED_IN_PANCREATIC_CANCER	HEIDENBLAD_AMPLIFIED_IN_PANCREATIC_CANCER		30	0.304502	0.827262	0.66309	0.745345	1	4342	tags=30%, list=23%, signal=39%
GENTILE_UV_RESPONSE_CLUSTER_D2	GENTILE_UV_RESPONSE_CLUSTER_D2		40	0.251761	0.82719	0.658996	0.744985	1	4062	tags=33%, list=22%, signal=41%
REACTOME_CYTOKINE_SIGNALING_IN_IMMUNE_SYSTEM	REACTOME_CYTOKINE_SIGNALING_IN_IMMUNE_SYSTEM		250	0.208485	0.826701	0.641851	0.745253	1	6788	tags=40%, list=36%, signal=63%
SUZUKI_RESPONSE_TO_TSA	SUZUKI_RESPONSE_TO_TSA		18	0.264832	0.826571	0.70297	0.744982	1	4084	tags=33%, list=22%, signal=43%
SMIRNOV_RESPONSE_TO_IR_2HR_DN	SMIRNOV_RESPONSE_TO_IR_2HR_DN		52	0.228255	0.826387	0.691023	0.744801	1	5017	tags=33%, list=27%, signal=45%
MONNIER_POSTRADIATION_TUMOR_ESCAPE_DN	MONNIER_POSTRADIATION_TUMOR_ESCAPE_DN		346	0.171564	0.826311	0.740519	0.744439	1	5396	tags=30%, list=29%, signal=42%
KEGG_BETA_ALANINE_METABOLISM	KEGG_BETA_ALANINE_METABOLISM		22	0.26284	0.824835	0.677734	0.746309	1	5382	tags=45%, list=29%, signal=64%
SCHAVOLT_TARGETS_OF_TP53_AND_TP63	SCHAVOLT_TARGETS_OF_TP53_AND_TP63		15	0.324107	0.822104	0.653928	0.75018	1	8226	tags=73%, list=44%, signal=131%
TAYLOR_METHYLATED_IN_ACUTE_LYMPHOBLASTIC_LEUKEMIA	TAYLOR_METHYLATED_IN_ACUTE_LYMPHOBLASTIC_LEUKEMIA		73	0.202026	0.821783	0.758691	0.750174	1	6252	tags=45%, list=33%, signal=68%
UEDA_CENTRAL_CLOCK	UEDA_CENTRAL_CLOCK		85	0.201319	0.816688	0.754757	0.758021	1	3195	tags=22%, list=17%, signal=27%
DEMAGALHAES_AGING_DN	DEMAGALHAES_AGING_DN		15	0.297027	0.815948	0.661943	0.758711	1	2792	tags=33%, list=15%, signal=39%
CHIBA_RESPONSE_TO_TSA	CHIBA_RESPONSE_TO_TSA		46	0.23248	0.815069	0.701195	0.759576	1	3068	tags=24%, list=16%, signal=29%
AMUNDSON_DNA_DAMAGE_RESPONSE_TP53	AMUNDSON_DNA_DAMAGE_RESPONSE_TP53		15	0.30895	0.814719	0.672917	0.759609	1	5608	tags=47%, list=30%, signal=67%
MEISSNER_NPC_HCP_WITH_H3K27ME3	MEISSNER_NPC_HCP_WITH_H3K27ME3		76	0.220575	0.813724	0.747951	0.760705	1	2534	tags=14%, list=14%, signal=17%
REACTOME_CTLA4_INHIBITORY_SIGNALING	REACTOME_CTLA4_INHIBITORY_SIGNALING		21	0.26598	0.813614	0.674797	0.760398	1	3735	tags=38%, list=20%, signal=48%
GALE_APL_WITH_FLT3_MUTATED_DN	GALE_APL_WITH_FLT3_MUTATED_DN		16	0.32506	0.81184	0.654076	0.762768	1	6901	tags=63%, list=37%, signal=99%
AMIT_SERUM_RESPONSE_120_MCF10A	AMIT_SERUM_RESPONSE_120_MCF10A		64	0.229023	0.809713	0.692308	0.765707	1	3567	tags=22%, list=19%, signal=27%
REACTOME_NEF_MEDIATES_DOWN_MODULATION_OF_CELL_SURFACE_RECEPTORS_BY_RECRUITING_THEM_TO_CLATHRIN_ADAPTERS	REACTOME_NEF_MEDIATES_DOWN_MODULATION_OF_CELL_SURFACE_RECEPTORS_BY_RECRUITING_THEM_TO_CLATHRIN_ADAPTERS		20	0.292248	0.809626	0.658487	0.765361	1	3115	tags=30%, list=17%, signal=36%
MURATA_VIRULENCE_OF_H_PILORI	MURATA_VIRULENCE_OF_H_PILORI		24	0.26248	0.808366	0.719512	0.766874	1	3976	tags=29%, list=21%, signal=37%
KEGG_CHRONIC_MYELOID_LEUKEMIA	KEGG_CHRONIC_MYELOID_LEUKEMIA		73	0.215289	0.807794	0.720559	0.767291	1	6008	tags=42%, list=32%, signal=62%
NEWMAN_ERCC6_TARGETS_UP	NEWMAN_ERCC6_TARGETS_UP		23	0.26917	0.807418	0.718686	0.767432	1	5979	tags=43%, list=32%, signal=64%
CEBALLOS_TARGETS_OF_TP53_AND_MYC_UP	CEBALLOS_TARGETS_OF_TP53_AND_MYC_UP		21	0.260198	0.806953	0.698347	0.767711	1	5394	tags=52%, list=29%, signal=74%
LEE_LIVER_CANCER_MYC_E2F1_DN	LEE_LIVER_CANCER_MYC_E2F1_DN		61	0.222508	0.80599	0.751938	0.768692	1	1200	tags=11%, list=6%, signal=12%
NIKOLSKY_BREAST_CANCER_17Q11_Q21_AMPLICON	NIKOLSKY_BREAST_CANCER_17Q11_Q21_AMPLICON		122	0.252533	0.805908	0.643006	0.768308	1	8490	tags=55%, list=45%, signal=100%
ST_ERK1_ERK2_MAPK_PATHWAY	ST_ERK1_ERK2_MAPK_PATHWAY		31	0.257947	0.805323	0.687129	0.768781	1	6500	tags=42%, list=35%, signal=64%
TIEN_INTESTINE_PROBIOTICS_2HR_DN	TIEN_INTESTINE_PROBIOTICS_2HR_DN		85	0.209083	0.803056	0.7	0.771872	1	4422	tags=32%, list=24%, signal=41%
BROWNE_HCMV_INFECTION_10HR_UP	BROWNE_HCMV_INFECTION_10HR_UP		95	0.195032	0.801726	0.815574	0.773506	1	5828	tags=37%, list=31%, signal=53%
REACTOME_PI3K_AKT_ACTIVATION	REACTOME_PI3K_AKT_ACTIVATION		36	0.232566	0.80163	0.733333	0.773156	1	3615	tags=28%, list=19%, signal=34%
REACTOME_SIGNALING_BY_HIPPO	REACTOME_SIGNALING_BY_HIPPO		20	0.276771	0.801433	0.684536	0.772963	1	4807	tags=40%, list=26%, signal=54%
ST_GAQ_PATHWAY	ST_GAQ_PATHWAY		27	0.24231	0.8007	0.728	0.773608	1	5062	tags=41%, list=27%, signal=56%
PARK_HSC_MARKERS	PARK_HSC_MARKERS		44	0.211389	0.800074	0.757962	0.77411	1	3545	tags=25%, list=19%, signal=31%
GENTILE_UV_RESPONSE_CLUSTER_D7	GENTILE_UV_RESPONSE_CLUSTER_D7		36	0.223717	0.797978	0.764826	0.776907	1	5151	tags=39%, list=28%, signal=54%
BHATI_G2M_ARREST_BY_2METHOXYESTRADIOL_DN	BHATI_G2M_ARREST_BY_2METHOXYESTRADIOL_DN		122	0.192022	0.797622	0.758333	0.776991	1	5860	tags=39%, list=31%, signal=56%
HAHTOLA_MYCOSIS_FUNGOIDES_UP	HAHTOLA_MYCOSIS_FUNGOIDES_UP		18	0.272678	0.797611	0.707661	0.776513	1	1119	tags=11%, list=6%, signal=12%
ST_P38_MAPK_PATHWAY	ST_P38_MAPK_PATHWAY		37	0.237288	0.797007	0.727634	0.776952	1	1844	tags=16%, list=10%, signal=18%
JUBAN_TARGETS_OF_SPI1_AND_FLI1_UP	JUBAN_TARGETS_OF_SPI1_AND_FLI1_UP		109	0.185796	0.794519	0.813525	0.780366	1	3650	tags=21%, list=20%, signal=26%
KEGG_BLADDER_CANCER	KEGG_BLADDER_CANCER		40	0.219232	0.794242	0.763326	0.7803	1	6589	tags=50%, list=35%, signal=77%
KEGG_NON_SMALL_CELL_LUNG_CANCER	KEGG_NON_SMALL_CELL_LUNG_CANCER		54	0.208178	0.793583	0.768463	0.780832	1	7143	tags=50%, list=38%, signal=81%
DAZARD_UV_RESPONSE_CLUSTER_G2	DAZARD_UV_RESPONSE_CLUSTER_G2		29	0.261189	0.792696	0.699797	0.78173	1	6476	tags=52%, list=35%, signal=79%
KYNG_NORMAL_AGING_DN	KYNG_NORMAL_AGING_DN		27	0.240829	0.792591	0.737288	0.781411	1	4857	tags=33%, list=26%, signal=45%
HEIDENBLAD_AMPLICON_8Q24_DN	HEIDENBLAD_AMPLICON_8Q24_DN		43	0.216259	0.792528	0.777555	0.781012	1	5638	tags=42%, list=30%, signal=60%
FERRARI_RESPONSE_TO_FENRETINIDE_UP	FERRARI_RESPONSE_TO_FENRETINIDE_UP		21	0.261098	0.791202	0.714286	0.78253	1	3263	tags=29%, list=17%, signal=35%
REACTOME_CD28_CO_STIMULATION	REACTOME_CD28_CO_STIMULATION		31	0.243712	0.790543	0.74375	0.783053	1	3708	tags=32%, list=20%, signal=40%
KEGG_O_GLYCAN_BIOSYNTHESIS	KEGG_O_GLYCAN_BIOSYNTHESIS		27	0.260327	0.788271	0.697154	0.785952	1	6367	tags=48%, list=34%, signal=73%
HAMAI_APOPTOSIS_VIA_TRAIL_DN	HAMAI_APOPTOSIS_VIA_TRAIL_DN		176	0.195763	0.785552	0.775967	0.789717	1	4367	tags=27%, list=23%, signal=35%
REACTOME_PROLONGED_ERK_ACTIVATION_EVENTS	REACTOME_PROLONGED_ERK_ACTIVATION_EVENTS		19	0.242292	0.78495	0.740964	0.790188	1	5371	tags=42%, list=29%, signal=59%
FARMER_BREAST_CANCER_CLUSTER_6	FARMER_BREAST_CANCER_CLUSTER_6		15	0.293209	0.784146	0.710204	0.790878	1	4243	tags=40%, list=23%, signal=52%
REACTOME_MAP_KINASE_ACTIVATION_IN_TLR_CASCADE	REACTOME_MAP_KINASE_ACTIVATION_IN_TLR_CASCADE		49	0.226756	0.783965	0.759184	0.790623	1	5371	tags=39%, list=29%, signal=54%
LAMB_CCND1_TARGETS	LAMB_CCND1_TARGETS		19	0.262724	0.783012	0.729839	0.791563	1	3540	tags=37%, list=19%, signal=45%
REACTOME_ARMS_MEDIATED_ACTIVATION	REACTOME_ARMS_MEDIATED_ACTIVATION		17	0.248009	0.781377	0.751491	0.793611	1	5371	tags=47%, list=29%, signal=66%
SARTIPY_NORMAL_AT_INSULIN_RESISTANCE_UP	SARTIPY_NORMAL_AT_INSULIN_RESISTANCE_UP		33	0.243505	0.779492	0.759754	0.796069	1	3570	tags=27%, list=19%, signal=34%
TRACEY_RESISTANCE_TO_IFNA2_DN	TRACEY_RESISTANCE_TO_IFNA2_DN		28	0.240516	0.776017	0.74538	0.800903	1	5087	tags=32%, list=27%, signal=44%
TSAI_RESPONSE_TO_IONIZING_RADIATION	TSAI_RESPONSE_TO_IONIZING_RADIATION		145	0.19172	0.774611	0.743802	0.802488	1	1942	tags=14%, list=10%, signal=15%
REACTOME_DARPP_32_EVENTS	REACTOME_DARPP_32_EVENTS		24	0.252067	0.773532	0.757455	0.803646	1	3832	tags=38%, list=20%, signal=47%
PID_AR_TF_PATHWAY	PID_AR_TF_PATHWAY		52	0.209205	0.771388	0.78125	0.806437	1	5359	tags=37%, list=29%, signal=51%
SENGUPTA_NASOPHARYNGEAL_CARCINOMA_WITH_LMP1_UP	SENGUPTA_NASOPHARYNGEAL_CARCINOMA_WITH_LMP1_UP		377	0.181708	0.770564	0.788732	0.807195	1	3414	tags=21%, list=18%, signal=26%
SIG_CD40PATHWAYMAP	SIG_CD40PATHWAYMAP		34	0.222862	0.770514	0.759259	0.806765	1	5675	tags=38%, list=30%, signal=55%
KEGG_ENDOMETRIAL_CANCER	KEGG_ENDOMETRIAL_CANCER		52	0.212874	0.769702	0.734021	0.80746	1	5371	tags=38%, list=29%, signal=54%
KOHOUTEK_CCNT1_TARGETS	KOHOUTEK_CCNT1_TARGETS		47	0.231312	0.767537	0.743271	0.810242	1	4755	tags=30%, list=25%, signal=40%
HOLLERN_MICROACINAR_BREAST_TUMOR_UP	HOLLERN_MICROACINAR_BREAST_TUMOR_UP		30	0.246407	0.766448	0.730924	0.811371	1	5061	tags=30%, list=27%, signal=41%
HOLLEMAN_VINCRISTINE_RESISTANCE_B_ALL_UP	HOLLEMAN_VINCRISTINE_RESISTANCE_B_ALL_UP		36	0.213159	0.765181	0.813808	0.812711	1	5513	tags=39%, list=29%, signal=55%
CHIARADONNA_NEOPLASTIC_TRANSFORMATION_KRAS_CDC25_UP	CHIARADONNA_NEOPLASTIC_TRANSFORMATION_KRAS_CDC25_UP		55	0.213636	0.765161	0.764344	0.81223	1	2635	tags=18%, list=14%, signal=21%
PID_VEGFR1_2_PATHWAY	PID_VEGFR1_2_PATHWAY		69	0.212452	0.76511	0.771717	0.811802	1	4876	tags=33%, list=26%, signal=45%
CREIGHTON_ENDOCRINE_THERAPY_RESISTANCE_2	CREIGHTON_ENDOCRINE_THERAPY_RESISTANCE_2		379	0.172437	0.764827	0.810277	0.811716	1	2490	tags=15%, list=13%, signal=17%
SCHLOSSER_SERUM_RESPONSE_UP	SCHLOSSER_SERUM_RESPONSE_UP		125	0.200918	0.764804	0.767207	0.811237	1	4933	tags=31%, list=26%, signal=42%
GINESTIER_BREAST_CANCER_20Q13_AMPLIFICATION_UP	GINESTIER_BREAST_CANCER_20Q13_AMPLIFICATION_UP		106	0.192357	0.763434	0.769388	0.812744	1	5763	tags=37%, list=31%, signal=53%
PID_IL3_PATHWAY	PID_IL3_PATHWAY		26	0.236377	0.761659	0.777559	0.814886	1	3887	tags=27%, list=21%, signal=34%
BIOCARTA_EIF4_PATHWAY	BIOCARTA_EIF4_PATHWAY		24	0.250735	0.760891	0.736196	0.815533	1	3423	tags=29%, list=18%, signal=36%
GENTILE_UV_HIGH_DOSE_UP	GENTILE_UV_HIGH_DOSE_UP		24	0.243001	0.760479	0.724638	0.815634	1	903	tags=13%, list=5%, signal=13%
REACTOME_ACTIVATED_TLR4_SIGNALLING	REACTOME_ACTIVATED_TLR4_SIGNALLING		91	0.197741	0.759815	0.816568	0.816117	1	5415	tags=36%, list=29%, signal=51%
REACTOME_SPHINGOLIPID_METABOLISM	REACTOME_SPHINGOLIPID_METABOLISM		63	0.200278	0.757848	0.810204	0.818429	1	5701	tags=33%, list=30%, signal=48%
REACTOME_GLUCURONIDATION	REACTOME_GLUCURONIDATION		18	0.290128	0.757012	0.73904	0.8192	1	6089	tags=28%, list=33%, signal=41%
KOBAYASHI_EGFR_SIGNALING_6HR_DN	KOBAYASHI_EGFR_SIGNALING_6HR_DN		18	0.298393	0.756171	0.713675	0.819928	1	6723	tags=50%, list=36%, signal=78%
SMIRNOV_RESPONSE_TO_IR_6HR_UP	SMIRNOV_RESPONSE_TO_IR_6HR_UP		154	0.174706	0.755898	0.835073	0.819819	1	6494	tags=38%, list=35%, signal=58%
PID_SYNDECAN_2_PATHWAY	PID_SYNDECAN_2_PATHWAY		31	0.234786	0.755849	0.777542	0.819371	1	5656	tags=48%, list=30%, signal=69%
REACTOME_MYD88_MAL_CASCADE_INITIATED_ON_PLASMA_MEMBRANE	REACTOME_MYD88_MAL_CASCADE_INITIATED_ON_PLASMA_MEMBRANE		81	0.19826	0.755624	0.806387	0.819201	1	5371	tags=36%, list=29%, signal=50%
SHIN_B_CELL_LYMPHOMA_CLUSTER_2	SHIN_B_CELL_LYMPHOMA_CLUSTER_2		28	0.228504	0.754637	0.818557	0.820164	1	4241	tags=25%, list=23%, signal=32%
SCHEIDEREIT_IKK_TARGETS	SCHEIDEREIT_IKK_TARGETS		18	0.268658	0.754029	0.759916	0.820572	1	5881	tags=44%, list=31%, signal=65%
PID_IL1_PATHWAY	PID_IL1_PATHWAY		34	0.223128	0.749048	0.770428	0.827184	1	5571	tags=41%, list=30%, signal=59%
KEGG_NITROGEN_METABOLISM	KEGG_NITROGEN_METABOLISM		23	0.244265	0.748141	0.801541	0.828002	1	8660	tags=65%, list=46%, signal=121%
PID_MYC_REPRESS_PATHWAY	PID_MYC_REPRESS_PATHWAY		62	0.183766	0.747512	0.839357	0.828407	1	1249	tags=11%, list=7%, signal=12%
REACTOME_PRE_NOTCH_EXPRESSION_AND_PROCESSING	REACTOME_PRE_NOTCH_EXPRESSION_AND_PROCESSING		38	0.216075	0.747114	0.821277	0.828462	1	3949	tags=32%, list=21%, signal=40%
SCIAN_INVERSED_TARGETS_OF_TP53_AND_TP73_DN	SCIAN_INVERSED_TARGETS_OF_TP53_AND_TP73_DN		31	0.222646	0.746958	0.793878	0.828175	1	4911	tags=35%, list=26%, signal=48%
SAGIV_CD24_TARGETS_UP	SAGIV_CD24_TARGETS_UP		21	0.240947	0.745241	0.813953	0.830145	1	4002	tags=24%, list=21%, signal=30%
REACTOME_PI3K_EVENTS_IN_ERBB4_SIGNALING	REACTOME_PI3K_EVENTS_IN_ERBB4_SIGNALING		36	0.217952	0.743714	0.813121	0.831785	1	3615	tags=22%, list=19%, signal=27%
BREDEMEYER_RAG_SIGNALING_VIA_ATM_NOT_VIA_NFKB_DN	BREDEMEYER_RAG_SIGNALING_VIA_ATM_NOT_VIA_NFKB_DN		36	0.199214	0.742654	0.865731	0.83278	1	7466	tags=53%, list=40%, signal=88%
BIOCARTA_SPRY_PATHWAY	BIOCARTA_SPRY_PATHWAY		18	0.254051	0.741986	0.778008	0.833212	1	6589	tags=44%, list=35%, signal=69%
BERNARD_PPAPDC1B_TARGETS_UP	BERNARD_PPAPDC1B_TARGETS_UP		36	0.210384	0.741633	0.824017	0.833175	1	6479	tags=50%, list=35%, signal=76%
WANG_METHYLATED_IN_BREAST_CANCER	WANG_METHYLATED_IN_BREAST_CANCER		34	0.242286	0.737884	0.748454	0.837944	1	3055	tags=24%, list=16%, signal=28%
PENG_RAPAMYCIN_RESPONSE_UP	PENG_RAPAMYCIN_RESPONSE_UP		190	0.189696	0.737238	0.818548	0.838312	1	5400	tags=33%, list=29%, signal=45%
ACEVEDO_LIVER_TUMOR_VS_NORMAL_ADJACENT_TISSUE_DN	ACEVEDO_LIVER_TUMOR_VS_NORMAL_ADJACENT_TISSUE_DN		255	0.160298	0.734159	0.940828	0.842112	1	6868	tags=40%, list=37%, signal=63%
JAZAG_TGFB1_SIGNALING_DN	JAZAG_TGFB1_SIGNALING_DN		33	0.208505	0.733675	0.866803	0.842272	1	4678	tags=30%, list=25%, signal=40%
LEONARD_HYPOXIA	LEONARD_HYPOXIA		47	0.217454	0.733157	0.779141	0.842493	1	5194	tags=36%, list=28%, signal=50%
OUYANG_PROSTATE_CANCER_PROGRESSION_DN	OUYANG_PROSTATE_CANCER_PROGRESSION_DN		19	0.242876	0.733143	0.794179	0.841983	1	5371	tags=37%, list=29%, signal=52%
JOSEPH_RESPONSE_TO_SODIUM_BUTYRATE_UP	JOSEPH_RESPONSE_TO_SODIUM_BUTYRATE_UP		31	0.241948	0.732542	0.763158	0.842315	1	3842	tags=32%, list=21%, signal=41%
LANDIS_ERBB2_BREAST_TUMORS_65_UP	LANDIS_ERBB2_BREAST_TUMORS_65_UP		21	0.244785	0.73138	0.776423	0.843442	1	6054	tags=43%, list=32%, signal=63%
REACTOME_NFKB_AND_MAP_KINASES_ACTIVATION_MEDIATED_BY_TLR4_SIGNALING_REPERTOIRE	REACTOME_NFKB_AND_MAP_KINASES_ACTIVATION_MEDIATED_BY_TLR4_SIGNALING_REPERTOIRE		70	0.195377	0.730948	0.825147	0.84351	1	5415	tags=37%, list=29%, signal=52%
REACTOME_NUCLEOTIDE_BINDING_DOMAIN_LEUCINE_RICH_REPEAT_CONTAINING_RECEPTOR_NLR_SIGNALING_PATHWAYS	REACTOME_NUCLEOTIDE_BINDING_DOMAIN_LEUCINE_RICH_REPEAT_CONTAINING_RECEPTOR_NLR_SIGNALING_PATHWAYS		45	0.214502	0.726083	0.805085	0.849812	1	5815	tags=40%, list=31%, signal=58%
REACTOME_SIGNALING_BY_NODAL	REACTOME_SIGNALING_BY_NODAL		17	0.258181	0.722306	0.804305	0.854342	1	7404	tags=47%, list=40%, signal=78%
REACTOME_CIRCADIAN_REPRESSION_OF_EXPRESSION_BY_REV_ERBA	REACTOME_CIRCADIAN_REPRESSION_OF_EXPRESSION_BY_REV_ERBA		22	0.243201	0.722287	0.797468	0.853836	1	5088	tags=41%, list=27%, signal=56%
TANAKA_METHYLATED_IN_ESOPHAGEAL_CARCINOMA	TANAKA_METHYLATED_IN_ESOPHAGEAL_CARCINOMA		100	0.17519	0.721192	0.922311	0.854812	1	3890	tags=23%, list=21%, signal=29%
KEGG_TRYPTOPHAN_METABOLISM	KEGG_TRYPTOPHAN_METABOLISM		39	0.204347	0.720962	0.853061	0.85457	1	5382	tags=33%, list=29%, signal=47%
PID_ALPHA_SYNUCLEIN_PATHWAY	PID_ALPHA_SYNUCLEIN_PATHWAY		32	0.212747	0.716308	0.853119	0.860336	1	5925	tags=41%, list=32%, signal=59%
DURCHDEWALD_SKIN_CARCINOGENESIS_DN	DURCHDEWALD_SKIN_CARCINOGENESIS_DN		256	0.170731	0.713579	0.852525	0.863491	1	5338	tags=30%, list=29%, signal=42%
REACTOME_NOTCH1_INTRACELLULAR_DOMAIN_REGULATES_TRANSCRIPTION	REACTOME_NOTCH1_INTRACELLULAR_DOMAIN_REGULATES_TRANSCRIPTION		44	0.196916	0.712841	0.843813	0.863988	1	7244	tags=50%, list=39%, signal=81%
KEGG_GLYCEROLIPID_METABOLISM	KEGG_GLYCEROLIPID_METABOLISM		41	0.209611	0.710076	0.909283	0.867102	1	7331	tags=54%, list=39%, signal=88%
BIOCARTA_TOLL_PATHWAY	BIOCARTA_TOLL_PATHWAY		37	0.218412	0.709592	0.795761	0.86722	1	5311	tags=35%, list=28%, signal=49%
BRUECKNER_TARGETS_OF_MIRLET7A3_UP	BRUECKNER_TARGETS_OF_MIRLET7A3_UP		104	0.174842	0.709575	0.914938	0.866712	1	5569	tags=34%, list=30%, signal=48%
ST_PHOSPHOINOSITIDE_3_KINASE_PATHWAY	ST_PHOSPHOINOSITIDE_3_KINASE_PATHWAY		37	0.20246	0.708352	0.866255	0.867826	1	3284	tags=22%, list=18%, signal=26%
AMIT_EGF_RESPONSE_40_MCF10A	AMIT_EGF_RESPONSE_40_MCF10A		19	0.247482	0.708043	0.778234	0.867701	1	3141	tags=26%, list=17%, signal=32%
MOOTHA_GLYCOGEN_METABOLISM	MOOTHA_GLYCOGEN_METABOLISM		21	0.226709	0.703494	0.858051	0.873025	1	6302	tags=43%, list=34%, signal=65%
REACTOME_COSTIMULATION_BY_THE_CD28_FAMILY	REACTOME_COSTIMULATION_BY_THE_CD28_FAMILY		61	0.220714	0.702898	0.765914	0.873248	1	3735	tags=26%, list=20%, signal=33%
PID_ERBB2_ERBB3_PATHWAY	PID_ERBB2_ERBB3_PATHWAY		44	0.190435	0.702247	0.865731	0.873525	1	5640	tags=39%, list=30%, signal=55%
CHIANG_LIVER_CANCER_SUBCLASS_INTERFERON_DN	CHIANG_LIVER_CANCER_SUBCLASS_INTERFERON_DN		46	0.204994	0.702044	0.863727	0.873232	1	7027	tags=43%, list=38%, signal=69%
PID_PI3KCI_PATHWAY	PID_PI3KCI_PATHWAY		49	0.206912	0.700781	0.806982	0.874311	1	3708	tags=24%, list=20%, signal=30%
NIKOLSKY_BREAST_CANCER_12Q13_Q21_AMPLICON	NIKOLSKY_BREAST_CANCER_12Q13_Q21_AMPLICON		43	0.253383	0.700584	0.733205	0.874029	1	8102	tags=51%, list=43%, signal=90%
BIOCARTA_TNFR2_PATHWAY	BIOCARTA_TNFR2_PATHWAY		18	0.260744	0.698493	0.792683	0.876141	1	5062	tags=33%, list=27%, signal=46%
BIOCARTA_CDMAC_PATHWAY	BIOCARTA_CDMAC_PATHWAY		16	0.242368	0.695955	0.842105	0.878858	1	5371	tags=38%, list=29%, signal=53%
BIOCARTA_IGF1R_PATHWAY	BIOCARTA_IGF1R_PATHWAY		23	0.224234	0.694932	0.882937	0.879648	1	1844	tags=17%, list=10%, signal=19%
REACTOME_O_LINKED_GLYCOSYLATION_OF_MUCINS	REACTOME_O_LINKED_GLYCOSYLATION_OF_MUCINS		50	0.204322	0.694245	0.864119	0.879968	1	6471	tags=42%, list=35%, signal=64%
REACTOME_PI3K_EVENTS_IN_ERBB2_SIGNALING	REACTOME_PI3K_EVENTS_IN_ERBB2_SIGNALING		42	0.191293	0.693571	0.879921	0.88027	1	3615	tags=21%, list=19%, signal=27%
STARK_HYPPOCAMPUS_22Q11_DELETION_DN	STARK_HYPPOCAMPUS_22Q11_DELETION_DN		17	0.289586	0.691427	0.724551	0.882348	1	1951	tags=24%, list=10%, signal=26%
NAKAMURA_METASTASIS_MODEL_UP	NAKAMURA_METASTASIS_MODEL_UP		41	0.206246	0.691368	0.846465	0.881889	1	3817	tags=27%, list=20%, signal=34%
BIOCARTA_MEF2D_PATHWAY	BIOCARTA_MEF2D_PATHWAY		18	0.226319	0.689243	0.848907	0.883975	1	825	tags=11%, list=4%, signal=12%
NAGASHIMA_NRG1_SIGNALING_UP	NAGASHIMA_NRG1_SIGNALING_UP		171	0.189889	0.688873	0.813906	0.883879	1	5979	tags=37%, list=32%, signal=54%
SENGUPTA_NASOPHARYNGEAL_CARCINOMA_DN	SENGUPTA_NASOPHARYNGEAL_CARCINOMA_DN		301	0.169939	0.686538	0.906445	0.886179	1	6802	tags=33%, list=36%, signal=51%
FARDIN_HYPOXIA_11	FARDIN_HYPOXIA_11		32	0.232377	0.686352	0.789474	0.885875	1	5708	tags=38%, list=31%, signal=54%
JOHNSTONE_PARVB_TARGETS_2_UP	JOHNSTONE_PARVB_TARGETS_2_UP		129	0.18597	0.685406	0.85	0.886443	1	6127	tags=42%, list=33%, signal=62%
LIN_SILENCED_BY_TUMOR_MICROENVIRONMENT	LIN_SILENCED_BY_TUMOR_MICROENVIRONMENT		102	0.208673	0.685061	0.794179	0.886305	1	5473	tags=31%, list=29%, signal=44%
REACTOME_CELL_CELL_JUNCTION_ORGANIZATION	REACTOME_CELL_CELL_JUNCTION_ORGANIZATION		50	0.187278	0.681852	0.943888	0.889511	1	4668	tags=30%, list=25%, signal=40%
BIOCARTA_NFKB_PATHWAY	BIOCARTA_NFKB_PATHWAY		23	0.238175	0.68014	0.836	0.890944	1	5257	tags=35%, list=28%, signal=48%
WILLIAMS_ESR2_TARGETS_UP	WILLIAMS_ESR2_TARGETS_UP		23	0.211494	0.678766	0.889353	0.892006	1	3497	tags=26%, list=19%, signal=32%
PID_MAPK_TRK_PATHWAY	PID_MAPK_TRK_PATHWAY		34	0.201982	0.678268	0.858	0.892041	1	5720	tags=29%, list=31%, signal=42%
KEGG_ASCORBATE_AND_ALDARATE_METABOLISM	KEGG_ASCORBATE_AND_ALDARATE_METABOLISM		25	0.241633	0.677068	0.842105	0.892863	1	7024	tags=40%, list=38%, signal=64%
WANG_BARRETTS_ESOPHAGUS_UP	WANG_BARRETTS_ESOPHAGUS_UP		51	0.203792	0.674537	0.858847	0.895197	1	6887	tags=49%, list=37%, signal=77%
OZANNE_AP1_TARGETS_UP	OZANNE_AP1_TARGETS_UP		15	0.244207	0.67337	0.870637	0.895955	1	1390	tags=13%, list=7%, signal=14%
DAZARD_UV_RESPONSE_CLUSTER_G4	DAZARD_UV_RESPONSE_CLUSTER_G4		20	0.246995	0.669251	0.803279	0.900057	1	5484	tags=40%, list=29%, signal=57%
INGA_TP53_TARGETS	INGA_TP53_TARGETS		17	0.243158	0.668752	0.845992	0.900055	1	663	tags=12%, list=4%, signal=12%
REACTOME_PLATELET_SENSITIZATION_BY_LDL	REACTOME_PLATELET_SENSITIZATION_BY_LDL		16	0.228936	0.668207	0.862786	0.900077	1	3735	tags=31%, list=20%, signal=39%
BAUS_TFF2_TARGETS_UP	BAUS_TFF2_TARGETS_UP		30	0.210834	0.664352	0.88664	0.903791	1	4867	tags=30%, list=26%, signal=40%
REACTOME_INSULIN_RECEPTOR_RECYCLING	REACTOME_INSULIN_RECEPTOR_RECYCLING		22	0.217593	0.66242	0.886792	0.905348	1	8754	tags=68%, list=47%, signal=128%
VARELA_ZMPSTE24_TARGETS_DN	VARELA_ZMPSTE24_TARGETS_DN		36	0.189594	0.658665	0.90342	0.908842	1	6056	tags=39%, list=32%, signal=57%
PID_P38_MKK3_6PATHWAY	PID_P38_MKK3_6PATHWAY		26	0.20341	0.658449	0.912065	0.908518	1	4723	tags=27%, list=25%, signal=36%
TUOMISTO_TUMOR_SUPPRESSION_BY_COL13A1_UP	TUOMISTO_TUMOR_SUPPRESSION_BY_COL13A1_UP		16	0.233952	0.656748	0.882353	0.909746	1	4968	tags=31%, list=27%, signal=43%
HEDENFALK_BREAST_CANCER_BRACX_UP	HEDENFALK_BREAST_CANCER_BRACX_UP		20	0.223389	0.656412	0.861446	0.909561	1	6799	tags=55%, list=36%, signal=86%
ST_GRANULE_CELL_SURVIVAL_PATHWAY	ST_GRANULE_CELL_SURVIVAL_PATHWAY		27	0.197337	0.656344	0.90856	0.909085	1	5311	tags=33%, list=28%, signal=46%
BIOCARTA_IL2RB_PATHWAY	BIOCARTA_IL2RB_PATHWAY		38	0.216399	0.655351	0.85259	0.909586	1	1844	tags=13%, list=10%, signal=15%
RADAEVA_RESPONSE_TO_IFNA1_UP	RADAEVA_RESPONSE_TO_IFNA1_UP		52	0.231252	0.65534	0.818	0.909051	1	7196	tags=46%, list=38%, signal=75%
REACTOME_GLYCOSPHINGOLIPID_METABOLISM	REACTOME_GLYCOSPHINGOLIPID_METABOLISM		36	0.191037	0.646183	0.925101	0.917729	1	1879	tags=11%, list=10%, signal=12%
REACTOME_DOWNSTREAM_TCR_SIGNALING	REACTOME_DOWNSTREAM_TCR_SIGNALING		34	0.222184	0.644946	0.827184	0.918427	1	5047	tags=26%, list=27%, signal=36%
SPIRA_SMOKERS_LUNG_CANCER_UP	SPIRA_SMOKERS_LUNG_CANCER_UP		37	0.20209	0.644207	0.903491	0.918619	1	3923	tags=24%, list=21%, signal=31%
BIOCARTA_ERK_PATHWAY	BIOCARTA_ERK_PATHWAY		28	0.199042	0.643832	0.909651	0.918436	1	6600	tags=46%, list=35%, signal=72%
LEE_LIVER_CANCER_MYC_TGFA_DN	LEE_LIVER_CANCER_MYC_TGFA_DN		61	0.174566	0.640542	0.958661	0.921112	1	1197	tags=8%, list=6%, signal=9%
MARSON_FOXP3_TARGETS_DN	MARSON_FOXP3_TARGETS_DN		51	0.183219	0.631544	0.902534	0.92905	1	5131	tags=29%, list=27%, signal=40%
REACTOME_SIGNALING_BY_FGFR1_FUSION_MUTANTS	REACTOME_SIGNALING_BY_FGFR1_FUSION_MUTANTS		18	0.227233	0.631012	0.88247	0.928975	1	6725	tags=50%, list=36%, signal=78%
WENDT_COHESIN_TARGETS_UP	WENDT_COHESIN_TARGETS_UP		32	0.217241	0.629189	0.863636	0.930069	1	7726	tags=56%, list=41%, signal=96%
ZHAN_LATE_DIFFERENTIATION_GENES_DN	ZHAN_LATE_DIFFERENTIATION_GENES_DN		15	0.277707	0.627655	0.873984	0.930913	1	1787	tags=20%, list=10%, signal=22%
HOEGERKORP_CD44_TARGETS_TEMPORAL_DN	HOEGERKORP_CD44_TARGETS_TEMPORAL_DN		24	0.194834	0.627642	0.970894	0.930368	1	3347	tags=21%, list=18%, signal=25%
REACTOME_IRON_UPTAKE_AND_TRANSPORT	REACTOME_IRON_UPTAKE_AND_TRANSPORT		36	0.184936	0.626682	0.930418	0.930651	1	8754	tags=61%, list=47%, signal=115%
KEGG_ETHER_LIPID_METABOLISM	KEGG_ETHER_LIPID_METABOLISM		30	0.180676	0.622513	0.958246	0.933744	1	6920	tags=40%, list=37%, signal=63%
BIOCARTA_NKCELLS_PATHWAY	BIOCARTA_NKCELLS_PATHWAY		20	0.227779	0.617238	0.884381	0.937665	1	6459	tags=40%, list=35%, signal=61%
BIOCARTA_EPO_PATHWAY	BIOCARTA_EPO_PATHWAY		19	0.207915	0.61428	0.929577	0.939531	1	8121	tags=53%, list=43%, signal=93%
STEARMAN_LUNG_CANCER_EARLY_VS_LATE_DN	STEARMAN_LUNG_CANCER_EARLY_VS_LATE_DN		55	0.178546	0.612912	0.933333	0.940133	1	6514	tags=42%, list=35%, signal=64%
PID_BCR_5PATHWAY	PID_BCR_5PATHWAY		65	0.202337	0.611622	0.850622	0.940614	1	5371	tags=28%, list=29%, signal=39%
BIOCARTA_ACTINY_PATHWAY	BIOCARTA_ACTINY_PATHWAY		20	0.208176	0.611047	0.903101	0.940491	1	5390	tags=45%, list=29%, signal=63%
LINDSTEDT_DENDRITIC_CELL_MATURATION_B	LINDSTEDT_DENDRITIC_CELL_MATURATION_B		53	0.199639	0.606869	0.88391	0.94332	1	3639	tags=23%, list=19%, signal=28%
VETTER_TARGETS_OF_PRKCA_AND_ETS1_DN	VETTER_TARGETS_OF_PRKCA_AND_ETS1_DN		16	0.212645	0.603862	0.937093	0.945132	1	5684	tags=31%, list=30%, signal=45%
BIOCARTA_PTEN_PATHWAY	BIOCARTA_PTEN_PATHWAY		18	0.216377	0.603713	0.903733	0.94468	1	2222	tags=17%, list=12%, signal=19%
BIOCARTA_GLEEVEC_PATHWAY	BIOCARTA_GLEEVEC_PATHWAY		23	0.201104	0.601354	0.912779	0.945935	1	7884	tags=57%, list=42%, signal=98%
CHIANG_LIVER_CANCER_SUBCLASS_POLYSOMY7_UP	CHIANG_LIVER_CANCER_SUBCLASS_POLYSOMY7_UP		72	0.1551	0.59858	0.980952	0.947458	1	5818	tags=32%, list=31%, signal=46%
FERRANDO_TAL1_NEIGHBORS	FERRANDO_TAL1_NEIGHBORS		20	0.216693	0.598379	0.894	0.947038	1	1174	tags=10%, list=6%, signal=11%
KEGG_SYSTEMIC_LUPUS_ERYTHEMATOSUS	KEGG_SYSTEMIC_LUPUS_ERYTHEMATOSUS		127	0.17798	0.590951	0.893878	0.951871	1	6162	tags=37%, list=33%, signal=55%
WANG_BARRETTS_ESOPHAGUS_DN	WANG_BARRETTS_ESOPHAGUS_DN		25	0.219572	0.581698	0.882716	0.957689	1	5828	tags=36%, list=31%, signal=52%
REACTOME_TRANSPORT_OF_GLUCOSE_AND_OTHER_SUGARS_BILE_SALTS_AND_ORGANIC_ACIDS_METAL_IONS_AND_AMINE_COMPOUNDS	REACTOME_TRANSPORT_OF_GLUCOSE_AND_OTHER_SUGARS_BILE_SALTS_AND_ORGANIC_ACIDS_METAL_IONS_AND_AMINE_COMPOUNDS		89	0.14462	0.579688	0.997959	0.958433	1	7105	tags=33%, list=38%, signal=52%
RICKMAN_TUMOR_DIFFERENTIATED_WELL_VS_MODERATELY_DN	RICKMAN_TUMOR_DIFFERENTIATED_WELL_VS_MODERATELY_DN		107	0.185297	0.575215	0.894737	0.960687	1	5425	tags=26%, list=29%, signal=37%
KIM_LRRC3B_TARGETS	KIM_LRRC3B_TARGETS		30	0.233075	0.574382	0.839286	0.960615	1	4946	tags=27%, list=26%, signal=36%
ST_T_CELL_SIGNAL_TRANSDUCTION	ST_T_CELL_SIGNAL_TRANSDUCTION		44	0.183823	0.573181	0.928118	0.960844	1	3723	tags=23%, list=20%, signal=28%
REACTOME_AMINO_ACID_AND_OLIGOPEPTIDE_SLC_TRANSPORTERS	REACTOME_AMINO_ACID_AND_OLIGOPEPTIDE_SLC_TRANSPORTERS		49	0.161069	0.568629	0.985972	0.963029	1	3598	tags=14%, list=19%, signal=18%
BIOCARTA_CD40_PATHWAY	BIOCARTA_CD40_PATHWAY		15	0.213924	0.567819	0.913556	0.962929	1	5062	tags=33%, list=27%, signal=46%
ZHU_CMV_8_HR_UP	ZHU_CMV_8_HR_UP		46	0.19358	0.565676	0.896341	0.963641	1	7653	tags=48%, list=41%, signal=81%
LEE_LIVER_CANCER_DENA_DN	LEE_LIVER_CANCER_DENA_DN		74	0.162854	0.56479	0.997972	0.963595	1	8374	tags=46%, list=45%, signal=83%
BIOCARTA_FMLP_PATHWAY	BIOCARTA_FMLP_PATHWAY		35	0.16952	0.564693	0.964803	0.963078	1	6907	tags=43%, list=37%, signal=68%
PRAMOONJAGO_SOX4_TARGETS_UP	PRAMOONJAGO_SOX4_TARGETS_UP		51	0.173069	0.561325	0.950538	0.964391	1	5620	tags=29%, list=30%, signal=42%
ZHANG_RESPONSE_TO_IKK_INHIBITOR_AND_TNF_UP	ZHANG_RESPONSE_TO_IKK_INHIBITOR_AND_TNF_UP		216	0.15184	0.555931	0.95749	0.966845	1	6494	tags=34%, list=35%, signal=51%
REACTOME_AMINO_ACID_TRANSPORT_ACROSS_THE_PLASMA_MEMBRANE	REACTOME_AMINO_ACID_TRANSPORT_ACROSS_THE_PLASMA_MEMBRANE		31	0.176268	0.552262	0.983228	0.968215	1	4337	tags=19%, list=23%, signal=25%
REACTOME_TRANSPORT_TO_THE_GOLGI_AND_SUBSEQUENT_MODIFICATION	REACTOME_TRANSPORT_TO_THE_GOLGI_AND_SUBSEQUENT_MODIFICATION		33	0.173056	0.547348	0.97006	0.970093	1	6883	tags=42%, list=37%, signal=67%
BOYAULT_LIVER_CANCER_SUBCLASS_G12_DN	BOYAULT_LIVER_CANCER_SUBCLASS_G12_DN		15	0.197007	0.544724	0.965021	0.970815	1	7542	tags=53%, list=40%, signal=89%
REACTOME_REGULATION_OF_KIT_SIGNALING	REACTOME_REGULATION_OF_KIT_SIGNALING		16	0.209359	0.541663	0.967677	0.971719	1	3708	tags=25%, list=20%, signal=31%
KEGG_STARCH_AND_SUCROSE_METABOLISM	KEGG_STARCH_AND_SUCROSE_METABOLISM		49	0.156471	0.541265	0.983539	0.971322	1	9007	tags=43%, list=48%, signal=82%
HUMMERICH_BENIGN_SKIN_TUMOR_UP	HUMMERICH_BENIGN_SKIN_TUMOR_UP		17	0.22365	0.538165	0.912245	0.972206	1	3438	tags=18%, list=18%, signal=22%
CAVARD_LIVER_CANCER_MALIGNANT_VS_BENIGN	CAVARD_LIVER_CANCER_MALIGNANT_VS_BENIGN		30	0.174894	0.537364	0.969636	0.971997	1	6837	tags=37%, list=37%, signal=58%
PID_ERBB_NETWORK_PATHWAY	PID_ERBB_NETWORK_PATHWAY		15	0.190749	0.534999	0.978	0.972542	1	7514	tags=47%, list=40%, signal=78%
BOSCO_EPITHELIAL_DIFFERENTIATION_MODULE	BOSCO_EPITHELIAL_DIFFERENTIATION_MODULE		62	0.210091	0.53222	0.848936	0.973199	1	2839	tags=15%, list=15%, signal=17%
WATANABE_COLON_CANCER_MSI_VS_MSS_DN	WATANABE_COLON_CANCER_MSI_VS_MSS_DN		77	0.145535	0.531313	0.992248	0.973048	1	8008	tags=42%, list=43%, signal=72%
BIOCARTA_IL2_PATHWAY	BIOCARTA_IL2_PATHWAY		22	0.179276	0.520902	0.968689	0.97676	1	6412	tags=36%, list=34%, signal=55%
KIM_LIVER_CANCER_POOR_SURVIVAL_DN	KIM_LIVER_CANCER_POOR_SURVIVAL_DN		43	0.184166	0.520101	0.969231	0.9765	1	5875	tags=33%, list=31%, signal=47%
LEE_LIVER_CANCER_CIPROFIBRATE_DN	LEE_LIVER_CANCER_CIPROFIBRATE_DN		65	0.151437	0.519505	0.99604	0.976165	1	941	tags=6%, list=5%, signal=6%
OHGUCHI_LIVER_HNF4A_TARGETS_DN	OHGUCHI_LIVER_HNF4A_TARGETS_DN		140	0.141591	0.515497	0.996101	0.977144	1	2970	tags=12%, list=16%, signal=14%
HUMMERICH_MALIGNANT_SKIN_TUMOR_DN	HUMMERICH_MALIGNANT_SKIN_TUMOR_DN		17	0.16657	0.483606	1	0.986702	1	3074	tags=18%, list=16%, signal=21%
KEGG_LYSOSOME	KEGG_LYSOSOME		119	0.135976	0.482264	0.991684	0.986476	1	5510	tags=24%, list=29%, signal=34%
NIKOLSKY_BREAST_CANCER_7Q21_Q22_AMPLICON	NIKOLSKY_BREAST_CANCER_7Q21_Q22_AMPLICON		68	0.170051	0.471209	0.963601	0.98864	1	7408	tags=47%, list=40%, signal=78%
BOWIE_RESPONSE_TO_EXTRACELLULAR_MATRIX	BOWIE_RESPONSE_TO_EXTRACELLULAR_MATRIX		17	0.210744	0.449888	0.939394	0.992373	1	3683	tags=24%, list=20%, signal=29%
REACTOME_SYNTHESIS_SECRETION_AND_INACTIVATION_OF_GLP1	REACTOME_SYNTHESIS_SECRETION_AND_INACTIVATION_OF_GLP1		17	0.168386	0.446714	0.990138	0.992375	1	7217	tags=41%, list=39%, signal=67%
SHIN_B_CELL_LYMPHOMA_CLUSTER_5	SHIN_B_CELL_LYMPHOMA_CLUSTER_5		17	0.160764	0.44114	1	0.99272	1	15703	tags=100%, list=84%, signal=622%
REACTOME_ACYL_CHAIN_REMODELLING_OF_PI	REACTOME_ACYL_CHAIN_REMODELLING_OF_PI		15	0.159907	0.434831	0.996024	0.993097	1	6920	tags=40%, list=37%, signal=63%
SUMI_HNF4A_TARGETS	SUMI_HNF4A_TARGETS		30	0.142888	0.425935	0.996116	0.993786	1	16039	tags=100%, list=86%, signal=700%
REACTOME_INTERFERON_ALPHA_BETA_SIGNALING	REACTOME_INTERFERON_ALPHA_BETA_SIGNALING		51	0.133738	0.384755	0.98419	0.997246	1	7427	tags=39%, list=40%, signal=65%
KEGG_RETINOL_METABOLISM	KEGG_RETINOL_METABOLISM		63	0.106845	0.354188	1	0.998325	1	7659	tags=32%, list=41%, signal=54%

## Sheet: High expression of ARMCX1
NAME	GS<br> follow link to MSigDB	GS DETAILS	SIZE	ES	NES	NOM p-val	FDR q-val	FWER p-val	RANK AT MAX	LEADING EDGE
NABA_CORE_MATRISOME	NABA_CORE_MATRISOME	Details ...	270	-0.705789	-2.46548	0	0	0	3015	tags=54%, list=16%, signal=64%
LIM_MAMMARY_STEM_CELL_UP	LIM_MAMMARY_STEM_CELL_UP	Details ...	454	-0.715377	-2.4515	0	0	0	2560	tags=57%, list=14%, signal=64%
ONDER_CDH1_TARGETS_2_UP	ONDER_CDH1_TARGETS_2_UP	Details ...	242	-0.740422	-2.44453	0	0	0	2294	tags=60%, list=12%, signal=67%
SWEET_LUNG_CANCER_KRAS_DN	SWEET_LUNG_CANCER_KRAS_DN	Details ...	414	-0.619707	-2.44266	0	0	0	2598	tags=46%, list=14%, signal=52%
DURAND_STROMA_S_UP	DURAND_STROMA_S_UP	Details ...	279	-0.613101	-2.42994	0	0	0	2882	tags=46%, list=15%, signal=54%
BOQUEST_STEM_CELL_UP	BOQUEST_STEM_CELL_UP	Details ...	255	-0.768431	-2.41991	0	0	0	2347	tags=64%, list=13%, signal=73%
NABA_ECM_GLYCOPROTEINS	NABA_ECM_GLYCOPROTEINS	Details ...	192	-0.702756	-2.41723	0	0	0	2807	tags=52%, list=15%, signal=61%
GAUSSMANN_MLL_AF4_FUSION_TARGETS_E_UP	GAUSSMANN_MLL_AF4_FUSION_TARGETS_E_UP	Details ...	88	-0.644495	-2.3945	0	8.67521e-05	0.001	2435	tags=45%, list=13%, signal=52%
HOELZEL_NF1_TARGETS_DN	HOELZEL_NF1_TARGETS_DN	Details ...	99	-0.709711	-2.38481	0	7.7113e-05	0.001	2478	tags=56%, list=13%, signal=64%
WANG_SMARCE1_TARGETS_UP	WANG_SMARCE1_TARGETS_UP	Details ...	268	-0.649617	-2.36402	0	0.000138473	0.002	2679	tags=49%, list=14%, signal=56%
LIU_PROSTATE_CANCER_DN	LIU_PROSTATE_CANCER_DN	Details ...	451	-0.679913	-2.35718	0	0.000125884	0.002	2709	tags=54%, list=14%, signal=62%
SCHAEFFER_PROSTATE_DEVELOPMENT_48HR_DN	SCHAEFFER_PROSTATE_DEVELOPMENT_48HR_DN	Details ...	407	-0.574245	-2.35119	0	0.000185998	0.003	2947	tags=42%, list=16%, signal=49%
IZADPANAH_STEM_CELL_ADIPOSE_VS_BONE_DN	IZADPANAH_STEM_CELL_ADIPOSE_VS_BONE_DN	Details ...	103	-0.698782	-2.34264	0	0.00017169	0.003	2305	tags=50%, list=12%, signal=56%
LEE_NEURAL_CREST_STEM_CELL_UP	LEE_NEURAL_CREST_STEM_CELL_UP	Details ...	140	-0.629176	-2.33823	0	0.000159427	0.003	2745	tags=46%, list=15%, signal=53%
SABATES_COLORECTAL_ADENOMA_DN	SABATES_COLORECTAL_ADENOMA_DN	Details ...	262	-0.69319	-2.33308	0	0.000282454	0.005	2533	tags=48%, list=14%, signal=55%
ACEVEDO_FGFR1_TARGETS_IN_PROSTATE_CANCER_MODEL_DN	ACEVEDO_FGFR1_TARGETS_IN_PROSTATE_CANCER_MODEL_DN	Details ...	293	-0.601689	-2.32995	0	0.000317754	0.005	2306	tags=37%, list=12%, signal=42%
VECCHI_GASTRIC_CANCER_EARLY_DN	VECCHI_GASTRIC_CANCER_EARLY_DN	Details ...	327	-0.703169	-2.32553	0	0.000299062	0.005	3212	tags=55%, list=17%, signal=66%
SUZUKI_RESPONSE_TO_TSA_AND_DECITABINE_1A	SUZUKI_RESPONSE_TO_TSA_AND_DECITABINE_1A	Details ...	20	-0.772359	-2.32465	0	0.000282448	0.005	693	tags=35%, list=4%, signal=36%
HOLLERN_EMT_BREAST_TUMOR_UP	HOLLERN_EMT_BREAST_TUMOR_UP	Details ...	101	-0.756241	-2.32461	0	0.000267582	0.005	2767	tags=66%, list=15%, signal=77%
SCHUETZ_BREAST_CANCER_DUCTAL_INVASIVE_UP	SCHUETZ_BREAST_CANCER_DUCTAL_INVASIVE_UP	Details ...	333	-0.781295	-2.32358	0	0.000254203	0.005	2607	tags=67%, list=14%, signal=77%
PICCALUGA_ANGIOIMMUNOBLASTIC_LYMPHOMA_UP	PICCALUGA_ANGIOIMMUNOBLASTIC_LYMPHOMA_UP	Details ...	197	-0.734835	-2.32191	0	0.000242098	0.005	2794	tags=62%, list=15%, signal=73%
WAMUNYOKOLI_OVARIAN_CANCER_GRADES_1_2_DN	WAMUNYOKOLI_OVARIAN_CANCER_GRADES_1_2_DN	Details ...	63	-0.739201	-2.31646	0	0.000231094	0.005	2574	tags=59%, list=14%, signal=68%
LINDGREN_BLADDER_CANCER_CLUSTER_2B	LINDGREN_BLADDER_CANCER_CLUSTER_2B	Details ...	373	-0.690434	-2.31605	0	0.000221046	0.005	3221	tags=61%, list=17%, signal=72%
LIM_MAMMARY_LUMINAL_MATURE_DN	LIM_MAMMARY_LUMINAL_MATURE_DN	Details ...	96	-0.690547	-2.31292	0	0.000211836	0.005	2446	tags=52%, list=13%, signal=60%
DELYS_THYROID_CANCER_DN	DELYS_THYROID_CANCER_DN	Details ...	224	-0.616933	-2.30384	0	0.000274671	0.006	2760	tags=46%, list=15%, signal=53%
CHEBOTAEV_GR_TARGETS_DN	CHEBOTAEV_GR_TARGETS_DN	Details ...	116	-0.619415	-2.30247	0	0.000264107	0.006	2340	tags=43%, list=13%, signal=49%
ZHU_CMV_24_HR_DN	ZHU_CMV_24_HR_DN	Details ...	89	-0.676718	-2.29259	0	0.000397575	0.009	2247	tags=49%, list=12%, signal=56%
GAUSSMANN_MLL_AF4_FUSION_TARGETS_F_UP	GAUSSMANN_MLL_AF4_FUSION_TARGETS_F_UP	Details ...	174	-0.569727	-2.28326	0	0.000383376	0.009	2867	tags=41%, list=15%, signal=48%
SERVITJA_ISLET_HNF1A_TARGETS_UP	SERVITJA_ISLET_HNF1A_TARGETS_UP	Details ...	159	-0.627815	-2.27318	0	0.000423339	0.01	2608	tags=48%, list=14%, signal=55%
BEGUM_TARGETS_OF_PAX3_FOXO1_FUSION_UP	BEGUM_TARGETS_OF_PAX3_FOXO1_FUSION_UP	Details ...	60	-0.679372	-2.2685	0	0.000479449	0.011	2431	tags=43%, list=13%, signal=50%
COWLING_MYCN_TARGETS	COWLING_MYCN_TARGETS	Details ...	42	-0.743598	-2.26402	0	0.000536699	0.014	880	tags=45%, list=5%, signal=47%
WAMUNYOKOLI_OVARIAN_CANCER_LMP_DN	WAMUNYOKOLI_OVARIAN_CANCER_LMP_DN	Details ...	184	-0.69155	-2.2607	0	0.000543686	0.015	3285	tags=63%, list=18%, signal=76%
PANGAS_TUMOR_SUPPRESSION_BY_SMAD1_AND_SMAD5_UP	PANGAS_TUMOR_SUPPRESSION_BY_SMAD1_AND_SMAD5_UP	Details ...	122	-0.617219	-2.25581	0	0.000611973	0.018	3507	tags=53%, list=19%, signal=65%
NABA_PROTEOGLYCANS	NABA_PROTEOGLYCANS	Details ...	34	-0.755978	-2.24983	0	0.000672556	0.018	2107	tags=50%, list=11%, signal=56%
VECCHI_GASTRIC_CANCER_ADVANCED_VS_EARLY_UP	VECCHI_GASTRIC_CANCER_ADVANCED_VS_EARLY_UP	Details ...	165	-0.759224	-2.24868	0	0.000675537	0.019	2706	tags=67%, list=14%, signal=77%
WESTON_VEGFA_TARGETS_6HR	WESTON_VEGFA_TARGETS_6HR	Details ...	57	-0.684049	-2.24791	0	0.000656772	0.019	2247	tags=53%, list=12%, signal=60%
NEWMAN_ERCC6_TARGETS_DN	NEWMAN_ERCC6_TARGETS_DN	Details ...	36	-0.755243	-2.24529	0	0.000659281	0.019	1345	tags=47%, list=7%, signal=51%
DACOSTA_ERCC3_ALLELE_XPCS_VS_TTD_DN	DACOSTA_ERCC3_ALLELE_XPCS_VS_TTD_DN	Details ...	34	-0.728177	-2.24367	0	0.000679939	0.02	1684	tags=53%, list=9%, signal=58%
CAIRO_HEPATOBLASTOMA_CLASSES_DN	CAIRO_HEPATOBLASTOMA_CLASSES_DN	Details ...	199	-0.602567	-2.2436	0	0.000662505	0.02	2353	tags=41%, list=13%, signal=46%
PLASARI_TGFB1_TARGETS_10HR_DN	PLASARI_TGFB1_TARGETS_10HR_DN	Details ...	233	-0.563312	-2.24061	0	0.000703468	0.021	2816	tags=47%, list=15%, signal=55%
WANG_MLL_TARGETS	WANG_MLL_TARGETS	Details ...	277	-0.542551	-2.24029	0	0.000686311	0.021	3095	tags=39%, list=17%, signal=46%
ONDER_CDH1_SIGNALING_VIA_CTNNB1	ONDER_CDH1_SIGNALING_VIA_CTNNB1	Details ...	78	-0.641653	-2.23884	0	0.000698005	0.022	1741	tags=44%, list=9%, signal=48%
BERTUCCI_INVASIVE_CARCINOMA_DUCTAL_VS_LOBULAR_DN	BERTUCCI_INVASIVE_CARCINOMA_DUCTAL_VS_LOBULAR_DN	Details ...	43	-0.806932	-2.23839	0	0.000697636	0.023	2385	tags=67%, list=13%, signal=77%
ZHU_CMV_ALL_DN	ZHU_CMV_ALL_DN	Details ...	126	-0.618399	-2.23229	0	0.000805664	0.026	2484	tags=45%, list=13%, signal=52%
KANG_GIST_WITH_PDGFRA_UP	KANG_GIST_WITH_PDGFRA_UP	Details ...	48	-0.707774	-2.2321	0	0.00078776	0.026	3502	tags=63%, list=19%, signal=77%
RUIZ_TNC_TARGETS_UP	RUIZ_TNC_TARGETS_UP	Details ...	148	-0.589571	-2.23034	0	0.000787472	0.026	2610	tags=37%, list=14%, signal=43%
WONG_ENDMETRIUM_CANCER_DN	WONG_ENDMETRIUM_CANCER_DN	Details ...	76	-0.792872	-2.22382	0	0.000910836	0.029	1726	tags=63%, list=9%, signal=69%
HERNANDEZ_ABERRANT_MITOSIS_BY_DOCETACEL_4NM_UP	HERNANDEZ_ABERRANT_MITOSIS_BY_DOCETACEL_4NM_UP	Details ...	22	-0.738871	-2.22102	0	0.000958178	0.03	2442	tags=45%, list=13%, signal=52%
SMID_BREAST_CANCER_LUMINAL_A_UP	SMID_BREAST_CANCER_LUMINAL_A_UP	Details ...	80	-0.713752	-2.21429	0	0.00104758	0.032	2568	tags=58%, list=14%, signal=66%
WU_SILENCED_BY_METHYLATION_IN_BLADDER_CANCER	WU_SILENCED_BY_METHYLATION_IN_BLADDER_CANCER	Details ...	52	-0.684971	-2.21219	0	0.00104196	0.032	2192	tags=52%, list=12%, signal=59%
BOQUEST_STEM_CELL_CULTURED_VS_FRESH_UP	BOQUEST_STEM_CELL_CULTURED_VS_FRESH_UP	Details ...	408	-0.530476	-2.21155	0	0.00103974	0.033	2719	tags=40%, list=15%, signal=46%
VART_KSHV_INFECTION_ANGIOGENIC_MARKERS_DN	VART_KSHV_INFECTION_ANGIOGENIC_MARKERS_DN	Details ...	134	-0.561008	-2.21049	0	0.00104214	0.034	2082	tags=37%, list=11%, signal=41%
LINDGREN_BLADDER_CANCER_HIGH_RECURRENCE	LINDGREN_BLADDER_CANCER_HIGH_RECURRENCE	Details ...	48	-0.735717	-2.20932	0	0.00103843	0.035	1935	tags=56%, list=10%, signal=63%
SMID_BREAST_CANCER_NORMAL_LIKE_UP	SMID_BREAST_CANCER_NORMAL_LIKE_UP	Details ...	438	-0.680767	-2.2007	0	0.00118028	0.038	3306	tags=58%, list=18%, signal=69%
CHANDRAN_METASTASIS_DN	CHANDRAN_METASTASIS_DN	Details ...	283	-0.536557	-2.19986	0	0.00115882	0.038	3101	tags=40%, list=17%, signal=48%
VART_KSHV_INFECTION_ANGIOGENIC_MARKERS_UP	VART_KSHV_INFECTION_ANGIOGENIC_MARKERS_UP	Details ...	162	-0.6041	-2.19904	0	0.00115051	0.038	2297	tags=40%, list=12%, signal=45%
NAKAMURA_ADIPOGENESIS_EARLY_DN	NAKAMURA_ADIPOGENESIS_EARLY_DN	Details ...	38	-0.726208	-2.19794	0	0.00116552	0.04	3031	tags=66%, list=16%, signal=78%
HATADA_METHYLATED_IN_LUNG_CANCER_UP	HATADA_METHYLATED_IN_LUNG_CANCER_UP	Details ...	366	-0.491059	-2.19361	0	0.00125017	0.043	2837	tags=36%, list=15%, signal=41%
SENESE_HDAC1_AND_HDAC2_TARGETS_DN	SENESE_HDAC1_AND_HDAC2_TARGETS_DN	Details ...	207	-0.555695	-2.19249	0	0.00124161	0.044	2369	tags=41%, list=13%, signal=46%
SENESE_HDAC2_TARGETS_DN	SENESE_HDAC2_TARGETS_DN	Details ...	113	-0.595844	-2.19092	0	0.00126363	0.046	2086	tags=40%, list=11%, signal=45%
TRAYNOR_RETT_SYNDROM_UP	TRAYNOR_RETT_SYNDROM_UP	Details ...	40	-0.658597	-2.18853	0	0.00132891	0.048	2523	tags=48%, list=13%, signal=55%
LANDIS_BREAST_CANCER_PROGRESSION_DN	LANDIS_BREAST_CANCER_PROGRESSION_DN	Details ...	67	-0.64375	-2.18729	0	0.00130748	0.048	2559	tags=57%, list=14%, signal=65%
PETRETTO_CARDIAC_HYPERTROPHY	PETRETTO_CARDIAC_HYPERTROPHY	Details ...	33	-0.739881	-2.18183	0	0.00143442	0.052	2296	tags=64%, list=12%, signal=72%
RIGGI_EWING_SARCOMA_PROGENITOR_UP	RIGGI_EWING_SARCOMA_PROGENITOR_UP	Details ...	405	-0.498435	-2.17933	0	0.00149354	0.054	3131	tags=38%, list=17%, signal=44%
KANG_IMMORTALIZED_BY_TERT_DN	KANG_IMMORTALIZED_BY_TERT_DN	Details ...	99	-0.584809	-2.17526	0	0.00162027	0.058	2064	tags=36%, list=11%, signal=41%
KAAB_HEART_ATRIUM_VS_VENTRICLE_UP	KAAB_HEART_ATRIUM_VS_VENTRICLE_UP	Details ...	244	-0.539272	-2.17341	0	0.00165908	0.06	2745	tags=42%, list=15%, signal=49%
BASSO_HAIRY_CELL_LEUKEMIA_UP	BASSO_HAIRY_CELL_LEUKEMIA_UP	Details ...	80	-0.642818	-2.17316	0	0.00164857	0.061	3188	tags=51%, list=17%, signal=62%
RICKMAN_HEAD_AND_NECK_CANCER_F	RICKMAN_HEAD_AND_NECK_CANCER_F	Details ...	53	-0.701857	-2.17226	0	0.00163648	0.061	2445	tags=53%, list=13%, signal=61%
CLASPER_LYMPHATIC_VESSELS_DURING_METASTASIS_DN	CLASPER_LYMPHATIC_VESSELS_DURING_METASTASIS_DN	Details ...	36	-0.830385	-2.17066	0	0.00166181	0.063	1520	tags=69%, list=8%, signal=75%
BERTUCCI_MEDULLARY_VS_DUCTAL_BREAST_CANCER_DN	BERTUCCI_MEDULLARY_VS_DUCTAL_BREAST_CANCER_DN	Details ...	158	-0.653928	-2.16922	0	0.00165992	0.063	3489	tags=59%, list=19%, signal=73%
MCLACHLAN_DENTAL_CARIES_DN	MCLACHLAN_DENTAL_CARIES_DN	Details ...	77	-0.610713	-2.16548	0	0.00180567	0.071	1973	tags=38%, list=11%, signal=42%
MIYAGAWA_TARGETS_OF_EWSR1_ETS_FUSIONS_DN	MIYAGAWA_TARGETS_OF_EWSR1_ETS_FUSIONS_DN	Details ...	201	-0.598418	-2.16518	0	0.00179143	0.072	2911	tags=45%, list=16%, signal=52%
HOLLERN_SOLID_NODULAR_BREAST_TUMOR_DN	HOLLERN_SOLID_NODULAR_BREAST_TUMOR_DN	Details ...	30	-0.711636	-2.16337	0	0.00185197	0.075	2847	tags=57%, list=15%, signal=67%
KEGG_VASCULAR_SMOOTH_MUSCLE_CONTRACTION	KEGG_VASCULAR_SMOOTH_MUSCLE_CONTRACTION	Details ...	115	-0.567851	-2.16198	0	0.00186055	0.075	1964	tags=31%, list=10%, signal=35%
NAKAYAMA_SOFT_TISSUE_TUMORS_PCA2_DN	NAKAYAMA_SOFT_TISSUE_TUMORS_PCA2_DN	Details ...	76	-0.683134	-2.15155	0	0.00219922	0.088	2888	tags=51%, list=15%, signal=60%
ZHENG_GLIOBLASTOMA_PLASTICITY_DN	ZHENG_GLIOBLASTOMA_PLASTICITY_DN	Details ...	55	-0.661885	-2.15077	0	0.00218251	0.089	3260	tags=51%, list=17%, signal=61%
KINSEY_TARGETS_OF_EWSR1_FLII_FUSION_DN	KINSEY_TARGETS_OF_EWSR1_FLII_FUSION_DN	Details ...	306	-0.550331	-2.14908	0	0.00226932	0.093	3086	tags=41%, list=16%, signal=48%
SENESE_HDAC1_TARGETS_DN	SENESE_HDAC1_TARGETS_DN	Details ...	228	-0.520276	-2.1466	0	0.00235964	0.095	1872	tags=33%, list=10%, signal=37%
TAKEDA_TARGETS_OF_NUP98_HOXA9_FUSION_16D_UP	TAKEDA_TARGETS_OF_NUP98_HOXA9_FUSION_16D_UP	Details ...	162	-0.555313	-2.14411	0	0.00243717	0.1	3618	tags=46%, list=19%, signal=56%
RIGGI_EWING_SARCOMA_PROGENITOR_DN	RIGGI_EWING_SARCOMA_PROGENITOR_DN	Details ...	171	-0.568968	-2.14294	0	0.00242704	0.101	2301	tags=43%, list=12%, signal=49%
LINDVALL_IMMORTALIZED_BY_TERT_DN	LINDVALL_IMMORTALIZED_BY_TERT_DN	Details ...	78	-0.625153	-2.13378	0.00205339	0.00290646	0.111	3133	tags=56%, list=17%, signal=67%
KATSANOU_ELAVL1_TARGETS_UP	KATSANOU_ELAVL1_TARGETS_UP	Details ...	162	-0.512153	-2.13129	0	0.00299808	0.117	3852	tags=44%, list=21%, signal=55%
SWEET_KRAS_TARGETS_UP	SWEET_KRAS_TARGETS_UP	Details ...	80	-0.651453	-2.13027	0	0.00300442	0.118	3613	tags=60%, list=19%, signal=74%
CHIARADONNA_NEOPLASTIC_TRANSFORMATION_KRAS_CDC25_DN	CHIARADONNA_NEOPLASTIC_TRANSFORMATION_KRAS_CDC25_DN	Details ...	48	-0.660299	-2.12786	0	0.0030729	0.119	2681	tags=48%, list=14%, signal=56%
TSENG_ADIPOGENIC_POTENTIAL_DN	TSENG_ADIPOGENIC_POTENTIAL_DN	Details ...	44	-0.653941	-2.12508	0	0.00309618	0.119	2470	tags=48%, list=13%, signal=55%
WESTON_VEGFA_TARGETS_12HR	WESTON_VEGFA_TARGETS_12HR	Details ...	34	-0.698857	-2.12497	0.00210526	0.00306018	0.119	2247	tags=50%, list=12%, signal=57%
RODWELL_AGING_KIDNEY_NO_BLOOD_UP	RODWELL_AGING_KIDNEY_NO_BLOOD_UP	Details ...	203	-0.550038	-2.12458	0	0.0030535	0.119	2504	tags=40%, list=13%, signal=46%
REACTOME_GPCR_LIGAND_BINDING	REACTOME_GPCR_LIGAND_BINDING	Details ...	369	-0.540208	-2.12443	0	0.00303008	0.119	4127	tags=43%, list=22%, signal=54%
MIKKELSEN_ES_HCP_WITH_H3K27ME3	MIKKELSEN_ES_HCP_WITH_H3K27ME3	Details ...	39	-0.669373	-2.12078	0	0.00320221	0.127	4437	tags=56%, list=24%, signal=74%
KEGG_NEUROACTIVE_LIGAND_RECEPTOR_INTERACTION	KEGG_NEUROACTIVE_LIGAND_RECEPTOR_INTERACTION	Details ...	264	-0.557157	-2.11492	0	0.00343553	0.136	4127	tags=43%, list=22%, signal=55%
EBAUER_MYOGENIC_TARGETS_OF_PAX3_FOXO1_FUSION	EBAUER_MYOGENIC_TARGETS_OF_PAX3_FOXO1_FUSION	Details ...	49	-0.676955	-2.11391	0	0.0034283	0.137	2563	tags=51%, list=14%, signal=59%
REACTOME_CGMP_EFFECTS	REACTOME_CGMP_EFFECTS	Details ...	19	-0.794259	-2.11356	0	0.00341445	0.137	1283	tags=47%, list=7%, signal=51%
SCHAEFFER_PROSTATE_DEVELOPMENT_12HR_UP	SCHAEFFER_PROSTATE_DEVELOPMENT_12HR_UP	Details ...	112	-0.551898	-2.11245	0	0.00342112	0.138	2571	tags=45%, list=14%, signal=51%
INGRAM_SHH_TARGETS_UP	INGRAM_SHH_TARGETS_UP	Details ...	119	-0.530671	-2.10936	0	0.00357816	0.142	1624	tags=34%, list=9%, signal=37%
BOQUEST_STEM_CELL_CULTURED_VS_FRESH_DN	BOQUEST_STEM_CELL_CULTURED_VS_FRESH_DN	Details ...	30	-0.763919	-2.10603	0.00210084	0.00370615	0.147	3268	tags=70%, list=17%, signal=85%
LIEN_BREAST_CARCINOMA_METAPLASTIC	LIEN_BREAST_CARCINOMA_METAPLASTIC	Details ...	35	-0.77322	-2.10573	0	0.00370076	0.149	2006	tags=69%, list=11%, signal=77%
VERHAAK_AML_WITH_NPM1_MUTATED_DN	VERHAAK_AML_WITH_NPM1_MUTATED_DN	Details ...	234	-0.523135	-2.10464	0	0.00371213	0.15	3438	tags=43%, list=18%, signal=52%
ZHAN_MULTIPLE_MYELOMA_MS_UP	ZHAN_MULTIPLE_MYELOMA_MS_UP	Details ...	44	-0.6518	-2.10443	0	0.00370724	0.152	2931	tags=48%, list=16%, signal=56%
CHARAFE_BREAST_CANCER_LUMINAL_VS_MESENCHYMAL_DN	CHARAFE_BREAST_CANCER_LUMINAL_VS_MESENCHYMAL_DN	Details ...	436	-0.54832	-2.10362	0	0.00372574	0.156	3023	tags=46%, list=16%, signal=54%
MCGARVEY_SILENCED_BY_METHYLATION_IN_COLON_CANCER	MCGARVEY_SILENCED_BY_METHYLATION_IN_COLON_CANCER	Details ...	41	-0.649005	-2.10165	0	0.00383291	0.158	3171	tags=49%, list=17%, signal=59%
TURASHVILI_BREAST_DUCTAL_CARCINOMA_VS_LOBULAR_NORMAL_DN	TURASHVILI_BREAST_DUCTAL_CARCINOMA_VS_LOBULAR_NORMAL_DN	Details ...	63	-0.664246	-2.10154	0	0.00380177	0.158	2670	tags=48%, list=14%, signal=55%
MIKKELSEN_MCV6_ICP_WITH_H3K4ME3_AND_H3K27ME3	MIKKELSEN_MCV6_ICP_WITH_H3K4ME3_AND_H3K27ME3	Details ...	31	-0.683564	-2.10084	0	0.00381523	0.159	3396	tags=52%, list=18%, signal=63%
GENTLES_LEUKEMIC_STEM_CELL_UP	GENTLES_LEUKEMIC_STEM_CELL_UP	Details ...	26	-0.717964	-2.10079	0.00217865	0.00378563	0.159	1282	tags=50%, list=7%, signal=54%
NADERI_BREAST_CANCER_PROGNOSIS_DN	NADERI_BREAST_CANCER_PROGNOSIS_DN	Details ...	18	-0.783242	-2.10059	0	0.00376372	0.159	1053	tags=44%, list=6%, signal=47%
VALK_AML_CLUSTER_9	VALK_AML_CLUSTER_9	Details ...	34	-0.647138	-2.09933	0	0.00379797	0.16	2342	tags=44%, list=13%, signal=50%
HOWLIN_PUBERTAL_MAMMARY_GLAND	HOWLIN_PUBERTAL_MAMMARY_GLAND	Details ...	64	-0.583033	-2.09723	0	0.00395663	0.166	1931	tags=34%, list=10%, signal=38%
PID_INTEGRIN1_PATHWAY	PID_INTEGRIN1_PATHWAY	Details ...	66	-0.699209	-2.09701	0	0.00393458	0.166	2577	tags=61%, list=14%, signal=70%
BROWNE_HCMV_INFECTION_24HR_DN	BROWNE_HCMV_INFECTION_24HR_DN	Details ...	143	-0.528948	-2.09602	0	0.00394607	0.167	2837	tags=38%, list=15%, signal=45%
REACTOME_NITRIC_OXIDE_STIMULATES_GUANYLATE_CYCLASE	REACTOME_NITRIC_OXIDE_STIMULATES_GUANYLATE_CYCLASE	Details ...	25	-0.757847	-2.09305	0	0.00412474	0.175	1920	tags=52%, list=10%, signal=58%
HAN_JNK_SINGALING_DN	HAN_JNK_SINGALING_DN	Details ...	37	-0.63957	-2.09218	0	0.0041938	0.18	3495	tags=51%, list=19%, signal=63%
MIKKELSEN_MEF_LCP_WITH_H3K4ME3	MIKKELSEN_MEF_LCP_WITH_H3K4ME3	Details ...	115	-0.555154	-2.09122	0	0.00419468	0.183	2295	tags=37%, list=12%, signal=42%
REACTOME_CLASS_A1_RHODOPSIN_LIKE_RECEPTORS	REACTOME_CLASS_A1_RHODOPSIN_LIKE_RECEPTORS	Details ...	274	-0.540623	-2.09072	0	0.00419705	0.183	4127	tags=43%, list=22%, signal=54%
SCHRAETS_MLL_TARGETS_DN	SCHRAETS_MLL_TARGETS_DN	Details ...	32	-0.656366	-2.08958	0	0.00427345	0.185	2442	tags=47%, list=13%, signal=54%
SCHRAETS_MLL_TARGETS_UP	SCHRAETS_MLL_TARGETS_UP	Details ...	34	-0.627027	-2.08955	0	0.00423596	0.185	2281	tags=38%, list=12%, signal=43%
CAIRO_LIVER_DEVELOPMENT_UP	CAIRO_LIVER_DEVELOPMENT_UP	Details ...	158	-0.510549	-2.08728	0	0.00434684	0.193	2470	tags=39%, list=13%, signal=44%
KEGG_ECM_RECEPTOR_INTERACTION	KEGG_ECM_RECEPTOR_INTERACTION	Details ...	83	-0.640285	-2.08202	0	0.00469804	0.204	2337	tags=52%, list=12%, signal=59%
SASAI_RESISTANCE_TO_NEOPLASTIC_TRANSFROMATION	SASAI_RESISTANCE_TO_NEOPLASTIC_TRANSFROMATION	Details ...	48	-0.683459	-2.07944	0.00205339	0.0048359	0.209	1772	tags=54%, list=9%, signal=60%
KEGG_CALCIUM_SIGNALING_PATHWAY	KEGG_CALCIUM_SIGNALING_PATHWAY	Details ...	176	-0.518763	-2.07765	0	0.00492864	0.212	2742	tags=35%, list=15%, signal=41%
DAVICIONI_TARGETS_OF_PAX_FOXO1_FUSIONS_UP	DAVICIONI_TARGETS_OF_PAX_FOXO1_FUSIONS_UP	Details ...	242	-0.499094	-2.07701	0	0.00492695	0.215	2292	tags=33%, list=12%, signal=37%
MIKKELSEN_ES_ICP_WITH_H3K4ME3_AND_H3K27ME3	MIKKELSEN_ES_ICP_WITH_H3K4ME3_AND_H3K27ME3	Details ...	126	-0.537333	-2.07594	0	0.00496233	0.217	4066	tags=44%, list=22%, signal=55%
REACTOME_NCAM1_INTERACTIONS	REACTOME_NCAM1_INTERACTIONS	Details ...	39	-0.683759	-2.07412	0	0.00507198	0.221	3365	tags=64%, list=18%, signal=78%
YAO_HOXA10_TARGETS_VIA_PROGESTERONE_UP	YAO_HOXA10_TARGETS_VIA_PROGESTERONE_UP	Details ...	71	-0.567191	-2.07251	0	0.0051432	0.225	2786	tags=41%, list=15%, signal=48%
REACTOME_G_ALPHA_S_SIGNALLING_EVENTS	REACTOME_G_ALPHA_S_SIGNALLING_EVENTS	Details ...	114	-0.566351	-2.0716	0	0.00515245	0.227	3044	tags=40%, list=16%, signal=48%
NAKAMURA_ADIPOGENESIS_LATE_DN	NAKAMURA_ADIPOGENESIS_LATE_DN	Details ...	37	-0.664586	-2.07088	0.00396825	0.00517157	0.227	3031	tags=62%, list=16%, signal=74%
MASRI_RESISTANCE_TO_TAMOXIFEN_AND_AROMATASE_INHIBITORS_DN	MASRI_RESISTANCE_TO_TAMOXIFEN_AND_AROMATASE_INHIBITORS_DN	Details ...	19	-0.759864	-2.07059	0	0.0051302	0.227	2446	tags=53%, list=13%, signal=60%
PAPASPYRIDONOS_UNSTABLE_ATEROSCLEROTIC_PLAQUE_DN	PAPASPYRIDONOS_UNSTABLE_ATEROSCLEROTIC_PLAQUE_DN	Details ...	42	-0.820404	-2.06835	0.00204499	0.00521246	0.227	2657	tags=81%, list=14%, signal=94%
YAO_TEMPORAL_RESPONSE_TO_PROGESTERONE_CLUSTER_16	YAO_TEMPORAL_RESPONSE_TO_PROGESTERONE_CLUSTER_16	Details ...	73	-0.603725	-2.06343	0.00419287	0.00547606	0.235	2499	tags=51%, list=13%, signal=58%
CUI_TCF21_TARGETS_UP	CUI_TCF21_TARGETS_UP	Details ...	36	-0.654813	-2.06211	0	0.00551114	0.237	2864	tags=53%, list=15%, signal=62%
ROY_WOUND_BLOOD_VESSEL_UP	ROY_WOUND_BLOOD_VESSEL_UP	Details ...	49	-0.696004	-2.06066	0.008	0.00559885	0.238	1732	tags=51%, list=9%, signal=56%
WESTON_VEGFA_TARGETS	WESTON_VEGFA_TARGETS	Details ...	103	-0.546407	-2.06008	0.00201613	0.00558284	0.239	2297	tags=40%, list=12%, signal=45%
TURASHVILI_BREAST_LOBULAR_CARCINOMA_VS_DUCTAL_NORMAL_UP	TURASHVILI_BREAST_LOBULAR_CARCINOMA_VS_DUCTAL_NORMAL_UP	Details ...	67	-0.724581	-2.06005	0.00402414	0.00554772	0.239	2999	tags=69%, list=16%, signal=81%
CROONQUIST_STROMAL_STIMULATION_UP	CROONQUIST_STROMAL_STIMULATION_UP	Details ...	58	-0.686214	-2.05558	0	0.00594444	0.256	2568	tags=57%, list=14%, signal=66%
SMID_BREAST_CANCER_RELAPSE_IN_LUNG_DN	SMID_BREAST_CANCER_RELAPSE_IN_LUNG_DN	Details ...	36	-0.680187	-2.05509	0	0.00594011	0.257	2170	tags=47%, list=12%, signal=53%
PETROVA_PROX1_TARGETS_DN	PETROVA_PROX1_TARGETS_DN	Details ...	62	-0.641521	-2.05288	0	0.00609669	0.266	3734	tags=61%, list=20%, signal=76%
TAKEDA_TARGETS_OF_NUP98_HOXA9_FUSION_10D_UP	TAKEDA_TARGETS_OF_NUP98_HOXA9_FUSION_10D_UP	Details ...	177	-0.532126	-2.05197	0	0.0061117	0.27	3736	tags=41%, list=20%, signal=51%
MIKKELSEN_IPS_ICP_WITH_H3K4ME3_AND_H327ME3	MIKKELSEN_IPS_ICP_WITH_H3K4ME3_AND_H327ME3	Details ...	117	-0.533885	-2.05196	0	0.00606676	0.27	4251	tags=48%, list=23%, signal=62%
STEGER_ADIPOGENESIS_DN	STEGER_ADIPOGENESIS_DN	Details ...	25	-0.797391	-2.05085	0	0.00608805	0.271	3272	tags=80%, list=17%, signal=97%
MARTORIATI_MDM4_TARGETS_NEUROEPITHELIUM_DN	MARTORIATI_MDM4_TARGETS_NEUROEPITHELIUM_DN	Details ...	151	-0.534309	-2.05024	0	0.00612428	0.272	2801	tags=36%, list=15%, signal=42%
LEIN_CHOROID_PLEXUS_MARKERS	LEIN_CHOROID_PLEXUS_MARKERS	Details ...	99	-0.500546	-2.05002	0	0.00610675	0.272	2679	tags=33%, list=14%, signal=39%
LU_AGING_BRAIN_UP	LU_AGING_BRAIN_UP	Details ...	254	-0.494842	-2.0489	0	0.00615841	0.274	3267	tags=38%, list=17%, signal=46%
COLIN_PILOCYTIC_ASTROCYTOMA_VS_GLIOBLASTOMA_UP	COLIN_PILOCYTIC_ASTROCYTOMA_VS_GLIOBLASTOMA_UP	Details ...	34	-0.628779	-2.04623	0	0.00633923	0.279	2439	tags=47%, list=13%, signal=54%
NABA_COLLAGENS	NABA_COLLAGENS	Details ...	44	-0.709413	-2.04334	0.00207469	0.00650227	0.284	2337	tags=57%, list=12%, signal=65%
BURTON_ADIPOGENESIS_9	BURTON_ADIPOGENESIS_9	Details ...	88	-0.541829	-2.04324	0	0.0064568	0.284	3874	tags=45%, list=21%, signal=57%
REACTOME_PLATELET_HOMEOSTASIS	REACTOME_PLATELET_HOMEOSTASIS	Details ...	76	-0.544657	-2.03938	0	0.00674045	0.292	2878	tags=39%, list=15%, signal=46%
KEGG_DILATED_CARDIOMYOPATHY	KEGG_DILATED_CARDIOMYOPATHY	Details ...	90	-0.573526	-2.03795	0.00207039	0.00683042	0.294	2717	tags=43%, list=15%, signal=50%
WANG_IMMORTALIZED_BY_HOXA9_AND_MEIS1_DN	WANG_IMMORTALIZED_BY_HOXA9_AND_MEIS1_DN	Details ...	22	-0.771333	-2.03577	0	0.00690948	0.298	1935	tags=55%, list=10%, signal=61%
NABA_BASEMENT_MEMBRANES	NABA_BASEMENT_MEMBRANES	Details ...	40	-0.712384	-2.03501	0.00212766	0.0069401	0.299	2984	tags=68%, list=16%, signal=80%
GU_PDEF_TARGETS_UP	GU_PDEF_TARGETS_UP	Details ...	71	-0.61402	-2.03408	0.00199203	0.006984	0.301	2610	tags=49%, list=14%, signal=57%
VALK_AML_CLUSTER_1	VALK_AML_CLUSTER_1	Details ...	26	-0.648599	-2.03279	0.00208768	0.00710685	0.307	1427	tags=35%, list=8%, signal=37%
TONKS_TARGETS_OF_RUNX1_RUNX1T1_FUSION_GRANULOCYTE_UP	TONKS_TARGETS_OF_RUNX1_RUNX1T1_FUSION_GRANULOCYTE_UP	Details ...	53	-0.551163	-2.03101	0.00210526	0.0072298	0.312	3438	tags=47%, list=18%, signal=58%
REACTOME_G_ALPHA_Q_SIGNALLING_EVENTS	REACTOME_G_ALPHA_Q_SIGNALLING_EVENTS	Details ...	176	-0.506244	-2.03012	0	0.00734777	0.319	4406	tags=46%, list=24%, signal=60%
CHIANG_LIVER_CANCER_SUBCLASS_CTNNB1_DN	CHIANG_LIVER_CANCER_SUBCLASS_CTNNB1_DN	Details ...	161	-0.527622	-2.0298	0.00206612	0.00731167	0.319	3855	tags=46%, list=21%, signal=57%
HOLLERN_ADENOMYOEPITHELIAL_BREAST_TUMOR	HOLLERN_ADENOMYOEPITHELIAL_BREAST_TUMOR	Details ...	17	-0.832951	-2.02942	0	0.00731122	0.319	1294	tags=71%, list=7%, signal=76%
FRASOR_RESPONSE_TO_ESTRADIOL_UP	FRASOR_RESPONSE_TO_ESTRADIOL_UP	Details ...	37	-0.600356	-2.02891	0	0.00730475	0.32	2101	tags=38%, list=11%, signal=43%
RICKMAN_HEAD_AND_NECK_CANCER_B	RICKMAN_HEAD_AND_NECK_CANCER_B	Details ...	44	-0.596639	-2.02839	0	0.00729545	0.32	1536	tags=25%, list=8%, signal=27%
REACTOME_CLASS_B_2_SECRETIN_FAMILY_RECEPTORS	REACTOME_CLASS_B_2_SECRETIN_FAMILY_RECEPTORS	Details ...	82	-0.559828	-2.02831	0.00208333	0.00725468	0.32	3835	tags=45%, list=20%, signal=57%
TURASHVILI_BREAST_LOBULAR_CARCINOMA_VS_LOBULAR_NORMAL_DN	TURASHVILI_BREAST_LOBULAR_CARCINOMA_VS_LOBULAR_NORMAL_DN	Details ...	72	-0.645689	-2.02626	0.00399202	0.0073735	0.324	3001	tags=61%, list=16%, signal=73%
BERENJENO_TRANSFORMED_BY_RHOA_REVERSIBLY_DN	BERENJENO_TRANSFORMED_BY_RHOA_REVERSIBLY_DN	Details ...	29	-0.71391	-2.02604	0	0.00734864	0.325	2005	tags=52%, list=11%, signal=58%
CORRE_MULTIPLE_MYELOMA_UP	CORRE_MULTIPLE_MYELOMA_UP	Details ...	64	-0.557374	-2.0259	0	0.00730242	0.325	2044	tags=31%, list=11%, signal=35%
REACTOME_COLLAGEN_FORMATION	REACTOME_COLLAGEN_FORMATION	Details ...	54	-0.696037	-2.02573	0.002079	0.0072846	0.325	2337	tags=57%, list=12%, signal=65%
ACEVEDO_LIVER_CANCER_WITH_H3K27ME3_UP	ACEVEDO_LIVER_CANCER_WITH_H3K27ME3_UP	Details ...	249	-0.490951	-2.02529	0	0.0072894	0.325	4579	tags=49%, list=24%, signal=63%
CHANG_CORE_SERUM_RESPONSE_DN	CHANG_CORE_SERUM_RESPONSE_DN	Details ...	194	-0.507491	-2.02467	0	0.00731121	0.326	3242	tags=41%, list=17%, signal=49%
MANALO_HYPOXIA_UP	MANALO_HYPOXIA_UP	Details ...	199	-0.520447	-2.02447	0.00201207	0.00729964	0.327	3488	tags=46%, list=19%, signal=56%
CROONQUIST_IL6_DEPRIVATION_UP	CROONQUIST_IL6_DEPRIVATION_UP	Details ...	20	-0.71199	-2.02394	0	0.007328	0.331	3647	tags=70%, list=19%, signal=87%
KIM_GLIS2_TARGETS_UP	KIM_GLIS2_TARGETS_UP	Details ...	84	-0.672085	-2.02324	0.004158	0.00738878	0.335	2662	tags=52%, list=14%, signal=61%
KUNINGER_IGF1_VS_PDGFB_TARGETS_UP	KUNINGER_IGF1_VS_PDGFB_TARGETS_UP	Details ...	76	-0.577322	-2.01981	0	0.00766924	0.345	2857	tags=43%, list=15%, signal=51%
WILCOX_RESPONSE_TO_PROGESTERONE_DN	WILCOX_RESPONSE_TO_PROGESTERONE_DN	Details ...	63	-0.607447	-2.01865	0.002079	0.00773617	0.346	3008	tags=51%, list=16%, signal=60%
LEE_INTRATHYMIC_T_PROGENITOR	LEE_INTRATHYMIC_T_PROGENITOR	Details ...	19	-0.658538	-2.01564	0	0.008001	0.353	1843	tags=32%, list=10%, signal=35%
GEORGANTAS_HSC_MARKERS	GEORGANTAS_HSC_MARKERS	Details ...	66	-0.584498	-2.01525	0	0.00799213	0.354	3602	tags=45%, list=19%, signal=56%
TAKEDA_TARGETS_OF_NUP98_HOXA9_FUSION_8D_UP	TAKEDA_TARGETS_OF_NUP98_HOXA9_FUSION_8D_UP	Details ...	145	-0.516212	-2.01507	0	0.00796259	0.354	3373	tags=37%, list=18%, signal=45%
MISHRA_CARCINOMA_ASSOCIATED_FIBROBLAST_UP	MISHRA_CARCINOMA_ASSOCIATED_FIBROBLAST_UP	Details ...	24	-0.708375	-2.01489	0.00387597	0.00791603	0.354	1970	tags=42%, list=11%, signal=47%
WEST_ADRENOCORTICAL_TUMOR_MARKERS_DN	WEST_ADRENOCORTICAL_TUMOR_MARKERS_DN	Details ...	20	-0.758139	-2.01481	0	0.0078907	0.355	2657	tags=65%, list=14%, signal=76%
PID_INTEGRIN3_PATHWAY	PID_INTEGRIN3_PATHWAY	Details ...	43	-0.676273	-2.01305	0	0.00799303	0.357	2337	tags=53%, list=12%, signal=61%
TAKEDA_TARGETS_OF_NUP98_HOXA9_FUSION_6HR_UP	TAKEDA_TARGETS_OF_NUP98_HOXA9_FUSION_6HR_UP	Details ...	77	-0.53895	-2.01232	0.00209205	0.00801334	0.358	3165	tags=44%, list=17%, signal=53%
JECHLINGER_EPITHELIAL_TO_MESENCHYMAL_TRANSITION_UP	JECHLINGER_EPITHELIAL_TO_MESENCHYMAL_TRANSITION_UP	Details ...	70	-0.606279	-2.01092	0.00400802	0.00812767	0.361	2117	tags=41%, list=11%, signal=47%
TONKS_TARGETS_OF_RUNX1_RUNX1T1_FUSION_HSC_UP	TONKS_TARGETS_OF_RUNX1_RUNX1T1_FUSION_HSC_UP	Details ...	176	-0.487948	-2.00669	0	0.00861864	0.375	2496	tags=33%, list=13%, signal=38%
BROWNE_HCMV_INFECTION_18HR_DN	BROWNE_HCMV_INFECTION_18HR_DN	Details ...	168	-0.501796	-2.00514	0.0042735	0.00874517	0.38	3093	tags=40%, list=17%, signal=47%
FRIDMAN_IMMORTALIZATION_DN	FRIDMAN_IMMORTALIZATION_DN	Details ...	33	-0.649396	-1.99752	0.00200803	0.00958465	0.403	2247	tags=48%, list=12%, signal=55%
ROZANOV_MMP14_TARGETS_UP	ROZANOV_MMP14_TARGETS_UP	Details ...	257	-0.456129	-1.99477	0	0.0098712	0.409	3566	tags=38%, list=19%, signal=46%
ROZANOV_MMP14_TARGETS_SUBSET	ROZANOV_MMP14_TARGETS_SUBSET	Details ...	31	-0.739497	-1.98906	0	0.0106746	0.434	2847	tags=65%, list=15%, signal=76%
TAKEDA_TARGETS_OF_NUP98_HOXA9_FUSION_8D_DN	TAKEDA_TARGETS_OF_NUP98_HOXA9_FUSION_8D_DN	Details ...	192	-0.529104	-1.9877	0.00603622	0.0107855	0.438	3871	tags=51%, list=21%, signal=64%
DAWSON_METHYLATED_IN_LYMPHOMA_TCL1	DAWSON_METHYLATED_IN_LYMPHOMA_TCL1	Details ...	56	-0.559157	-1.98757	0	0.01076	0.439	2741	tags=41%, list=15%, signal=48%
SANA_TNF_SIGNALING_DN	SANA_TNF_SIGNALING_DN	Details ...	87	-0.542887	-1.98633	0.00410678	0.0108408	0.44	2301	tags=44%, list=12%, signal=50%
PEDRIOLI_MIR31_TARGETS_DN	PEDRIOLI_MIR31_TARGETS_DN	Details ...	373	-0.438784	-1.98561	0	0.01089	0.442	3739	tags=37%, list=20%, signal=45%
KAYO_CALORIE_RESTRICTION_MUSCLE_UP	KAYO_CALORIE_RESTRICTION_MUSCLE_UP	Details ...	94	-0.533324	-1.98474	0.00206612	0.010949	0.445	2781	tags=37%, list=15%, signal=44%
FRIDMAN_SENESCENCE_UP	FRIDMAN_SENESCENCE_UP	Details ...	77	-0.554773	-1.98455	0.00198413	0.0108948	0.445	1978	tags=34%, list=11%, signal=38%
GAUSSMANN_MLL_AF4_FUSION_TARGETS_G_UP	GAUSSMANN_MLL_AF4_FUSION_TARGETS_G_UP	Details ...	217	-0.431027	-1.98419	0	0.0108759	0.446	2657	tags=27%, list=14%, signal=31%
REACTOME_EXTRACELLULAR_MATRIX_ORGANIZATION	REACTOME_EXTRACELLULAR_MATRIX_ORGANIZATION	Details ...	83	-0.639755	-1.98312	0.00209205	0.010944	0.449	3126	tags=53%, list=17%, signal=63%
MCMURRAY_TP53_HRAS_COOPERATION_RESPONSE_DN	MCMURRAY_TP53_HRAS_COOPERATION_RESPONSE_DN	Details ...	66	-0.513691	-1.98184	0	0.0110614	0.453	2283	tags=32%, list=12%, signal=36%
PASINI_SUZ12_TARGETS_DN	PASINI_SUZ12_TARGETS_DN	Details ...	307	-0.519585	-1.98069	0	0.0111713	0.46	2535	tags=36%, list=14%, signal=41%
REACTOME_RESPONSE_TO_ELEVATED_PLATELET_CYTOSOLIC_CA2_	REACTOME_RESPONSE_TO_ELEVATED_PLATELET_CYTOSOLIC_CA2_	Details ...	80	-0.57096	-1.97178	0	0.0124577	0.478	2497	tags=38%, list=13%, signal=43%
CERVERA_SDHB_TARGETS_1_UP	CERVERA_SDHB_TARGETS_1_UP	Details ...	109	-0.493021	-1.97064	0	0.012561	0.482	2691	tags=30%, list=14%, signal=35%
TOMLINS_PROSTATE_CANCER_DN	TOMLINS_PROSTATE_CANCER_DN	Details ...	39	-0.765505	-1.96931	0.00408163	0.0127511	0.487	2354	tags=69%, list=13%, signal=79%
NABA_SECRETED_FACTORS	NABA_SECRETED_FACTORS	Details ...	315	-0.475191	-1.9689	0	0.0127143	0.487	3272	tags=30%, list=17%, signal=35%
YAO_TEMPORAL_RESPONSE_TO_PROGESTERONE_CLUSTER_0	YAO_TEMPORAL_RESPONSE_TO_PROGESTERONE_CLUSTER_0	Details ...	70	-0.541757	-1.96881	0.00203666	0.0126544	0.488	3267	tags=46%, list=17%, signal=55%
PID_AVB3_INTEGRIN_PATHWAY	PID_AVB3_INTEGRIN_PATHWAY	Details ...	74	-0.561916	-1.96747	0.00392927	0.0127904	0.492	3365	tags=53%, list=18%, signal=64%
HERNANDEZ_ABERRANT_MITOSIS_BY_DOCETACEL_2NM_UP	HERNANDEZ_ABERRANT_MITOSIS_BY_DOCETACEL_2NM_UP	Details ...	77	-0.525535	-1.96464	0	0.0130923	0.502	3128	tags=40%, list=17%, signal=48%
KEGG_HYPERTROPHIC_CARDIOMYOPATHY_HCM	KEGG_HYPERTROPHIC_CARDIOMYOPATHY_HCM	Details ...	83	-0.560626	-1.96463	0	0.0130262	0.502	3007	tags=45%, list=16%, signal=53%
HELLEBREKERS_SILENCED_DURING_TUMOR_ANGIOGENESIS	HELLEBREKERS_SILENCED_DURING_TUMOR_ANGIOGENESIS	Details ...	78	-0.564538	-1.96334	0.0020284	0.0131981	0.51	2301	tags=36%, list=12%, signal=41%
KONDO_EZH2_TARGETS	KONDO_EZH2_TARGETS	Details ...	221	-0.456571	-1.96276	0	0.013189	0.511	2858	tags=34%, list=15%, signal=40%
BURTON_ADIPOGENESIS_PEAK_AT_0HR	BURTON_ADIPOGENESIS_PEAK_AT_0HR		60	-0.574365	-1.96032	0.00423729	0.0135176	0.517	3175	tags=48%, list=17%, signal=58%
TSAI_RESPONSE_TO_RADIATION_THERAPY	TSAI_RESPONSE_TO_RADIATION_THERAPY		32	-0.671751	-1.95939	0.0020284	0.0135715	0.518	3007	tags=53%, list=16%, signal=63%
NIELSEN_GIST_VS_SYNOVIAL_SARCOMA_DN	NIELSEN_GIST_VS_SYNOVIAL_SARCOMA_DN		19	-0.731323	-1.95904	0.0020284	0.0135544	0.52	2183	tags=58%, list=12%, signal=65%
MOHANKUMAR_HOXA1_TARGETS_DN	MOHANKUMAR_HOXA1_TARGETS_DN		167	-0.470721	-1.9581	0	0.0136474	0.522	2624	tags=31%, list=14%, signal=36%
LIU_SMARCA4_TARGETS	LIU_SMARCA4_TARGETS		54	-0.561431	-1.95692	0.00206186	0.0138078	0.525	3211	tags=46%, list=17%, signal=56%
PID_SYNDECAN_1_PATHWAY	PID_SYNDECAN_1_PATHWAY		46	-0.62158	-1.95482	0.00819672	0.0140516	0.531	2337	tags=46%, list=12%, signal=52%
MIKKELSEN_MEF_ICP_WITH_H3K4ME3_AND_H3K27ME3	MIKKELSEN_MEF_ICP_WITH_H3K4ME3_AND_H3K27ME3		37	-0.623363	-1.95464	0	0.0140144	0.532	3618	tags=46%, list=19%, signal=57%
WIERENGA_STAT5A_TARGETS_DN	WIERENGA_STAT5A_TARGETS_DN		192	-0.473632	-1.95459	0	0.0139504	0.532	2983	tags=38%, list=16%, signal=45%
CORRE_MULTIPLE_MYELOMA_DN	CORRE_MULTIPLE_MYELOMA_DN		59	-0.515525	-1.95438	0.00210526	0.0139482	0.535	2338	tags=37%, list=12%, signal=42%
BERENJENO_TRANSFORMED_BY_RHOA_DN	BERENJENO_TRANSFORMED_BY_RHOA_DN		376	-0.463436	-1.95406	0.0020202	0.0139315	0.535	3498	tags=36%, list=19%, signal=44%
SCHOEN_NFKB_SIGNALING	SCHOEN_NFKB_SIGNALING		33	-0.66428	-1.95355	0.00194932	0.0139488	0.538	3119	tags=52%, list=17%, signal=62%
HERNANDEZ_MITOTIC_ARREST_BY_DOCETAXEL_1_UP	HERNANDEZ_MITOTIC_ARREST_BY_DOCETAXEL_1_UP		30	-0.613093	-1.95181	0	0.0141656	0.542	3815	tags=50%, list=20%, signal=63%
ZHANG_TLX_TARGETS_UP	ZHANG_TLX_TARGETS_UP		108	-0.508597	-1.94881	0	0.0145648	0.554	3193	tags=40%, list=17%, signal=48%
REACTOME_G_ALPHA_I_SIGNALLING_EVENTS	REACTOME_G_ALPHA_I_SIGNALLING_EVENTS		181	-0.518275	-1.94689	0	0.0149002	0.562	3815	tags=40%, list=20%, signal=50%
REACTOME_CHONDROITIN_SULFATE_DERMATAN_SULFATE_METABOLISM	REACTOME_CHONDROITIN_SULFATE_DERMATAN_SULFATE_METABOLISM		47	-0.578932	-1.94676	0.0020284	0.0148535	0.562	3661	tags=47%, list=20%, signal=58%
GRAHAM_CML_DIVIDING_VS_NORMAL_QUIESCENT_DN	GRAHAM_CML_DIVIDING_VS_NORMAL_QUIESCENT_DN		87	-0.549028	-1.94469	0	0.0151785	0.57	3812	tags=45%, list=20%, signal=56%
PLASARI_NFIC_TARGETS_BASAL_DN	PLASARI_NFIC_TARGETS_BASAL_DN		18	-0.686334	-1.94364	0	0.0153356	0.573	1236	tags=44%, list=7%, signal=48%
MIKKELSEN_IPS_HCP_WITH_H3_UNMETHYLATED	MIKKELSEN_IPS_HCP_WITH_H3_UNMETHYLATED		74	-0.567256	-1.94097	0.0021322	0.0157565	0.581	3682	tags=38%, list=20%, signal=47%
HORIUCHI_WTAP_TARGETS_UP	HORIUCHI_WTAP_TARGETS_UP		283	-0.45841	-1.94022	0	0.0158057	0.584	3554	tags=37%, list=19%, signal=45%
JAATINEN_HEMATOPOIETIC_STEM_CELL_DN	JAATINEN_HEMATOPOIETIC_STEM_CELL_DN		214	-0.552748	-1.93596	0.0160643	0.0165911	0.6	4440	tags=55%, list=24%, signal=71%
REACTOME_A_TETRASACCHARIDE_LINKER_SEQUENCE_IS_REQUIRED_FOR_GAG_SYNTHESIS	REACTOME_A_TETRASACCHARIDE_LINKER_SEQUENCE_IS_REQUIRED_FOR_GAG_SYNTHESIS		25	-0.609102	-1.93573	0	0.0165615	0.6	1971	tags=36%, list=11%, signal=40%
VANHARANTA_UTERINE_FIBROID_DN	VANHARANTA_UTERINE_FIBROID_DN		62	-0.563218	-1.93555	0.00843882	0.0165136	0.6	2199	tags=37%, list=12%, signal=42%
PETROVA_ENDOTHELIUM_LYMPHATIC_VS_BLOOD_DN	PETROVA_ENDOTHELIUM_LYMPHATIC_VS_BLOOD_DN		157	-0.514923	-1.935	0.00398406	0.0165527	0.6	2694	tags=39%, list=14%, signal=46%
VALK_AML_CLUSTER_11	VALK_AML_CLUSTER_11		36	-0.592885	-1.93494	0.00858369	0.016482	0.6	1944	tags=42%, list=10%, signal=46%
DAVICIONI_TARGETS_OF_PAX_FOXO1_FUSIONS_DN	DAVICIONI_TARGETS_OF_PAX_FOXO1_FUSIONS_DN		66	-0.501731	-1.9342	0	0.0165484	0.6	2522	tags=38%, list=13%, signal=44%
MOROSETTI_FACIOSCAPULOHUMERAL_MUSCULAR_DISTROPHY_UP	MOROSETTI_FACIOSCAPULOHUMERAL_MUSCULAR_DISTROPHY_UP		18	-0.729115	-1.93239	0	0.0168334	0.608	2875	tags=67%, list=15%, signal=79%
YAO_TEMPORAL_RESPONSE_TO_PROGESTERONE_CLUSTER_1	YAO_TEMPORAL_RESPONSE_TO_PROGESTERONE_CLUSTER_1		65	-0.528353	-1.92898	0	0.017389	0.616	2875	tags=37%, list=15%, signal=43%
KEGG_FOCAL_ADHESION	KEGG_FOCAL_ADHESION		197	-0.497408	-1.92402	0.00205761	0.0182467	0.635	2679	tags=38%, list=14%, signal=44%
PID_INTEGRIN5_PATHWAY	PID_INTEGRIN5_PATHWAY		17	-0.759254	-1.92381	0.00207039	0.0182297	0.635	2679	tags=59%, list=14%, signal=69%
REACTOME_AMINE_LIGAND_BINDING_RECEPTORS	REACTOME_AMINE_LIGAND_BINDING_RECEPTORS		34	-0.612624	-1.92193	0	0.0184975	0.637	2429	tags=32%, list=13%, signal=37%
TORCHIA_TARGETS_OF_EWSR1_FLI1_FUSION_TOP20_DN	TORCHIA_TARGETS_OF_EWSR1_FLI1_FUSION_TOP20_DN		18	-0.631712	-1.92116	0	0.0185713	0.641	2604	tags=44%, list=14%, signal=52%
ANASTASSIOU_MULTICANCER_INVASIVENESS_SIGNATURE	ANASTASSIOU_MULTICANCER_INVASIVENESS_SIGNATURE		63	-0.838472	-1.92098	0.00205339	0.0185339	0.642	2018	tags=81%, list=11%, signal=90%
LE_NEURONAL_DIFFERENTIATION_UP	LE_NEURONAL_DIFFERENTIATION_UP		17	-0.726837	-1.92077	0.00201613	0.0185121	0.642	1984	tags=47%, list=11%, signal=53%
LANDIS_ERBB2_BREAST_TUMORS_65_DN	LANDIS_ERBB2_BREAST_TUMORS_65_DN		35	-0.59674	-1.91817	0.00408163	0.0190009	0.655	1946	tags=43%, list=10%, signal=48%
WOO_LIVER_CANCER_RECURRENCE_UP	WOO_LIVER_CANCER_RECURRENCE_UP		102	-0.502863	-1.91734	0	0.0191028	0.657	2294	tags=36%, list=12%, signal=41%
SCHAEFFER_PROSTATE_DEVELOPMENT_12HR_DN	SCHAEFFER_PROSTATE_DEVELOPMENT_12HR_DN		55	-0.574824	-1.91685	0	0.0191065	0.658	3358	tags=55%, list=18%, signal=66%
EBAUER_TARGETS_OF_PAX3_FOXO1_FUSION_UP	EBAUER_TARGETS_OF_PAX3_FOXO1_FUSION_UP		199	-0.455425	-1.91607	0	0.0191926	0.661	3385	tags=38%, list=18%, signal=46%
AFFAR_YY1_TARGETS_UP	AFFAR_YY1_TARGETS_UP		204	-0.4293	-1.91489	0	0.0193431	0.663	2460	tags=27%, list=13%, signal=31%
KORKOLA_EMBRYONIC_CARCINOMA_VS_SEMINOMA_DN	KORKOLA_EMBRYONIC_CARCINOMA_VS_SEMINOMA_DN		22	-0.632282	-1.91481	0	0.0192823	0.663	3249	tags=55%, list=17%, signal=66%
EPPERT_CE_HSC_LSC	EPPERT_CE_HSC_LSC		37	-0.584918	-1.9136	0.00411523	0.019448	0.667	2373	tags=43%, list=13%, signal=49%
MASRI_RESISTANCE_TO_TAMOXIFEN_AND_AROMATASE_INHIBITORS_UP	MASRI_RESISTANCE_TO_TAMOXIFEN_AND_AROMATASE_INHIBITORS_UP		19	-0.680145	-1.91343	0.00201613	0.0194395	0.668	2888	tags=53%, list=15%, signal=62%
REACTOME_MUSCLE_CONTRACTION	REACTOME_MUSCLE_CONTRACTION		46	-0.647837	-1.91279	0.00824742	0.019514	0.672	2679	tags=48%, list=14%, signal=56%
DUNNE_TARGETS_OF_AML1_MTG8_FUSION_DN	DUNNE_TARGETS_OF_AML1_MTG8_FUSION_DN		19	-0.675273	-1.90994	0	0.0200905	0.677	3300	tags=68%, list=18%, signal=83%
IWANAGA_CARCINOGENESIS_BY_KRAS_PTEN_DN	IWANAGA_CARCINOGENESIS_BY_KRAS_PTEN_DN		325	-0.406485	-1.909	0	0.0201965	0.677	2917	tags=32%, list=16%, signal=37%
LI_CISPLATIN_RESISTANCE_DN	LI_CISPLATIN_RESISTANCE_DN		32	-0.563205	-1.90804	0.00404858	0.0202935	0.677	3696	tags=38%, list=20%, signal=47%
LI_WILMS_TUMOR_VS_FETAL_KIDNEY_2_DN	LI_WILMS_TUMOR_VS_FETAL_KIDNEY_2_DN		50	-0.5792	-1.9072	0.00403226	0.0204	0.68	2823	tags=46%, list=15%, signal=54%
RIZ_ERYTHROID_DIFFERENTIATION_12HR	RIZ_ERYTHROID_DIFFERENTIATION_12HR		41	-0.56837	-1.90542	0	0.0207017	0.689	1301	tags=27%, list=7%, signal=29%
GILDEA_METASTASIS	GILDEA_METASTASIS		27	-0.642405	-1.90117	0.00203252	0.0216394	0.705	2454	tags=48%, list=13%, signal=55%
ACEVEDO_LIVER_CANCER_WITH_H3K9ME3_UP	ACEVEDO_LIVER_CANCER_WITH_H3K9ME3_UP		106	-0.488245	-1.90089	0	0.0216463	0.707	4373	tags=45%, list=23%, signal=59%
POMEROY_MEDULLOBLASTOMA_DESMOPLASIC_VS_CLASSIC_DN	POMEROY_MEDULLOBLASTOMA_DESMOPLASIC_VS_CLASSIC_DN		59	-0.568034	-1.89932	0	0.0219297	0.712	1809	tags=36%, list=10%, signal=39%
PID_GLYPICAN_1PATHWAY	PID_GLYPICAN_1PATHWAY		27	-0.597018	-1.89835	0.00796813	0.0221267	0.716	2870	tags=52%, list=15%, signal=61%
MIKKELSEN_MCV6_HCP_WITH_H3K27ME3	MIKKELSEN_MCV6_HCP_WITH_H3K27ME3		411	-0.467032	-1.89653	0	0.0225022	0.721	4698	tags=44%, list=25%, signal=57%
BROWNE_HCMV_INFECTION_16HR_DN	BROWNE_HCMV_INFECTION_16HR_DN		85	-0.497301	-1.89583	0.00628931	0.0225571	0.724	3536	tags=45%, list=19%, signal=55%
LANDIS_ERBB2_BREAST_TUMORS_324_DN	LANDIS_ERBB2_BREAST_TUMORS_324_DN		141	-0.485281	-1.89574	0	0.022499	0.724	2598	tags=40%, list=14%, signal=46%
GAVIN_FOXP3_TARGETS_CLUSTER_P7	GAVIN_FOXP3_TARGETS_CLUSTER_P7		85	-0.497727	-1.89558	0	0.0224522	0.724	4249	tags=48%, list=23%, signal=62%
INGRAM_SHH_TARGETS_DN	INGRAM_SHH_TARGETS_DN		56	-0.527945	-1.89541	0.00204082	0.0223844	0.724	2495	tags=38%, list=13%, signal=43%
LEIN_LOCALIZED_TO_DISTAL_AND_PROXIMAL_DENDRITES	LEIN_LOCALIZED_TO_DISTAL_AND_PROXIMAL_DENDRITES		15	-0.727681	-1.88929	0.00402414	0.0236766	0.734	3479	tags=60%, list=19%, signal=74%
DAVICIONI_MOLECULAR_ARMS_VS_ERMS_DN	DAVICIONI_MOLECULAR_ARMS_VS_ERMS_DN		169	-0.470542	-1.88925	0.00210526	0.0236061	0.735	1884	tags=29%, list=10%, signal=32%
TSENG_IRS1_TARGETS_DN	TSENG_IRS1_TARGETS_DN		131	-0.451628	-1.88788	0.00206612	0.0238476	0.738	3061	tags=36%, list=16%, signal=43%
CASORELLI_APL_SECONDARY_VS_DE_NOVO_UP	CASORELLI_APL_SECONDARY_VS_DE_NOVO_UP		37	-0.51984	-1.88481	0.00399202	0.0244677	0.743	3816	tags=49%, list=20%, signal=61%
LEI_HOXC8_TARGETS_DN	LEI_HOXC8_TARGETS_DN		17	-0.687695	-1.88335	0	0.0247587	0.746	2565	tags=53%, list=14%, signal=61%
REACTOME_GASTRIN_CREB_SIGNALLING_PATHWAY_VIA_PKC_AND_MAPK	REACTOME_GASTRIN_CREB_SIGNALLING_PATHWAY_VIA_PKC_AND_MAPK		197	-0.445093	-1.88233	0	0.024921	0.748	4406	tags=42%, list=24%, signal=54%
IGLESIAS_E2F_TARGETS_UP	IGLESIAS_E2F_TARGETS_UP		148	-0.506327	-1.88189	0.0121704	0.0249505	0.749	2786	tags=42%, list=15%, signal=49%
RODRIGUES_THYROID_CARCINOMA_ANAPLASTIC_DN	RODRIGUES_THYROID_CARCINOMA_ANAPLASTIC_DN		474	-0.443002	-1.88074	0.00205761	0.0252287	0.753	2871	tags=32%, list=15%, signal=37%
BROWNE_HCMV_INFECTION_20HR_DN	BROWNE_HCMV_INFECTION_20HR_DN		96	-0.482641	-1.87984	0.00606061	0.0253984	0.755	2690	tags=34%, list=14%, signal=40%
NABA_ECM_AFFILIATED	NABA_ECM_AFFILIATED		164	-0.45596	-1.87927	0	0.0254495	0.757	3628	tags=34%, list=19%, signal=42%
LINDVALL_IMMORTALIZED_BY_TERT_UP	LINDVALL_IMMORTALIZED_BY_TERT_UP		73	-0.502196	-1.87792	0.00414938	0.0257216	0.761	1945	tags=30%, list=10%, signal=34%
KEGG_GAP_JUNCTION	KEGG_GAP_JUNCTION		89	-0.435951	-1.87655	0.00198413	0.0260149	0.768	1687	tags=24%, list=9%, signal=26%
BAELDE_DIABETIC_NEPHROPATHY_UP	BAELDE_DIABETIC_NEPHROPATHY_UP		80	-0.515747	-1.87537	0.0105042	0.0262249	0.771	2301	tags=34%, list=12%, signal=38%
ZHANG_TLX_TARGETS_60HR_UP	ZHANG_TLX_TARGETS_60HR_UP		283	-0.441263	-1.87247	0.00198807	0.026911	0.777	3364	tags=36%, list=18%, signal=44%
REACTOME_NETRIN1_SIGNALING	REACTOME_NETRIN1_SIGNALING		38	-0.521769	-1.87011	0	0.0274341	0.781	2086	tags=32%, list=11%, signal=35%
THUM_MIR21_TARGETS_HEART_DISEASE_UP	THUM_MIR21_TARGETS_HEART_DISEASE_UP		16	-0.871533	-1.86934	0.00204082	0.0275933	0.781	1836	tags=94%, list=10%, signal=104%
NAKAYAMA_SOFT_TISSUE_TUMORS_PCA1_UP	NAKAYAMA_SOFT_TISSUE_TUMORS_PCA1_UP		71	-0.683445	-1.8678	0.0147368	0.0279479	0.785	3173	tags=54%, list=17%, signal=64%
RIZ_ERYTHROID_DIFFERENTIATION_APOBEC2	RIZ_ERYTHROID_DIFFERENTIATION_APOBEC2		25	-0.574461	-1.86695	0	0.0280422	0.788	888	tags=28%, list=5%, signal=29%
CHEN_LVAD_SUPPORT_OF_FAILING_HEART_UP	CHEN_LVAD_SUPPORT_OF_FAILING_HEART_UP		100	-0.549643	-1.86674	0.00595238	0.028007	0.789	4007	tags=55%, list=21%, signal=70%
PLASARI_TGFB1_SIGNALING_VIA_NFIC_10HR_DN	PLASARI_TGFB1_SIGNALING_VIA_NFIC_10HR_DN		30	-0.582514	-1.86504	0.00205761	0.0284244	0.799	2659	tags=40%, list=14%, signal=47%
HARRIS_BRAIN_CANCER_PROGENITORS	HARRIS_BRAIN_CANCER_PROGENITORS		42	-0.579289	-1.86451	0.00214133	0.0284646	0.8	3520	tags=50%, list=19%, signal=61%
JI_CARCINOGENESIS_BY_KRAS_AND_STK11_DN	JI_CARCINOGENESIS_BY_KRAS_AND_STK11_DN		17	-0.801773	-1.86447	0.00639659	0.0283786	0.8	2443	tags=82%, list=13%, signal=95%
MIKKELSEN_NPC_ICP_WITH_H3K4ME3	MIKKELSEN_NPC_ICP_WITH_H3K4ME3		410	-0.382553	-1.86418	0	0.0283732	0.8	2844	tags=29%, list=15%, signal=33%
SIMBULAN_PARP1_TARGETS_UP	SIMBULAN_PARP1_TARGETS_UP		31	-0.628966	-1.86395	0.00828157	0.0283496	0.8	2059	tags=45%, list=11%, signal=51%
TAKEDA_TARGETS_OF_NUP98_HOXA9_FUSION_3D_UP	TAKEDA_TARGETS_OF_NUP98_HOXA9_FUSION_3D_UP		169	-0.494479	-1.86364	0.00619835	0.0283431	0.801	2795	tags=32%, list=15%, signal=37%
KONDO_PROSTATE_CANCER_WITH_H3K27ME3	KONDO_PROSTATE_CANCER_WITH_H3K27ME3		165	-0.510718	-1.86058	0.0020284	0.0291193	0.812	4270	tags=36%, list=23%, signal=46%
HOQUE_METHYLATED_IN_CANCER	HOQUE_METHYLATED_IN_CANCER		56	-0.471884	-1.85915	0.00209205	0.0293776	0.816	2232	tags=32%, list=12%, signal=36%
REACTOME_GLYCOSAMINOGLYCAN_METABOLISM	REACTOME_GLYCOSAMINOGLYCAN_METABOLISM		107	-0.484888	-1.85718	0.00598802	0.0299038	0.82	2980	tags=34%, list=16%, signal=40%
TAVAZOIE_METASTASIS	TAVAZOIE_METASTASIS		97	-0.464433	-1.85669	0	0.0299547	0.82	2317	tags=26%, list=12%, signal=29%
WINTER_HYPOXIA_DN	WINTER_HYPOXIA_DN		46	-0.754583	-1.85499	0.00214592	0.0303175	0.825	3173	tags=72%, list=17%, signal=86%
REACTOME_PEPTIDE_LIGAND_BINDING_RECEPTORS	REACTOME_PEPTIDE_LIGAND_BINDING_RECEPTORS		171	-0.487768	-1.85471	0	0.0302875	0.826	4200	tags=40%, list=22%, signal=52%
MOLENAAR_TARGETS_OF_CCND1_AND_CDK4_UP	MOLENAAR_TARGETS_OF_CCND1_AND_CDK4_UP		62	-0.5087	-1.8537	0.0020284	0.0304883	0.83	2370	tags=29%, list=13%, signal=33%
ONDER_CDH1_TARGETS_3_UP	ONDER_CDH1_TARGETS_3_UP		17	-0.725814	-1.85367	0.012474	0.0303937	0.83	2757	tags=53%, list=15%, signal=62%
GROSS_ELK3_TARGETS_UP	GROSS_ELK3_TARGETS_UP		27	-0.592022	-1.85264	0.00639659	0.0305669	0.831	3221	tags=48%, list=17%, signal=58%
MAHADEVAN_IMATINIB_RESISTANCE_UP	MAHADEVAN_IMATINIB_RESISTANCE_UP		19	-0.629817	-1.85252	0.0020202	0.0304934	0.831	2067	tags=47%, list=11%, signal=53%
REACTOME_PHOSPHOLIPASE_C_MEDIATED_CASCADE	REACTOME_PHOSPHOLIPASE_C_MEDIATED_CASCADE		52	-0.521668	-1.85188	0.002079	0.0305735	0.832	1629	tags=29%, list=9%, signal=32%
TERAMOTO_OPN_TARGETS_CLUSTER_6	TERAMOTO_OPN_TARGETS_CLUSTER_6		26	-0.577535	-1.8513	0.00831601	0.0306492	0.833	1354	tags=31%, list=7%, signal=33%
BONOME_OVARIAN_CANCER_POOR_SURVIVAL_UP	BONOME_OVARIAN_CANCER_POOR_SURVIVAL_UP		31	-0.664778	-1.85119	0.00643777	0.0305832	0.833	2260	tags=48%, list=12%, signal=55%
CHARAFE_BREAST_CANCER_BASAL_VS_MESENCHYMAL_DN	CHARAFE_BREAST_CANCER_BASAL_VS_MESENCHYMAL_DN		49	-0.566875	-1.84898	0.0104384	0.0311362	0.834	4614	tags=57%, list=25%, signal=76%
CHIBA_RESPONSE_TO_TSA_UP	CHIBA_RESPONSE_TO_TSA_UP		51	-0.561176	-1.8482	0.00819672	0.0312626	0.834	1742	tags=31%, list=9%, signal=34%
REACTOME_CHONDROITIN_SULFATE_BIOSYNTHESIS	REACTOME_CHONDROITIN_SULFATE_BIOSYNTHESIS		19	-0.685699	-1.84753	0.00209205	0.0313862	0.834	3661	tags=63%, list=20%, signal=78%
YAUCH_HEDGEHOG_SIGNALING_PARACRINE_UP	YAUCH_HEDGEHOG_SIGNALING_PARACRINE_UP		139	-0.436011	-1.84672	0	0.0314742	0.834	3200	tags=37%, list=17%, signal=45%
BIOCARTA_LAIR_PATHWAY	BIOCARTA_LAIR_PATHWAY		16	-0.748268	-1.84659	0.00643777	0.031412	0.834	3632	tags=63%, list=19%, signal=77%
KORKOLA_YOLK_SAC_TUMOR	KORKOLA_YOLK_SAC_TUMOR		57	-0.520768	-1.84634	0	0.0313956	0.834	3529	tags=39%, list=19%, signal=47%
DUTERTRE_ESTRADIOL_RESPONSE_6HR_DN	DUTERTRE_ESTRADIOL_RESPONSE_6HR_DN		89	-0.466432	-1.84579	0.00200401	0.0314787	0.836	3903	tags=45%, list=21%, signal=57%
VERNOCHET_ADIPOGENESIS	VERNOCHET_ADIPOGENESIS		19	-0.629188	-1.84512	0.0063425	0.0316287	0.837	1917	tags=37%, list=10%, signal=41%
IVANOVA_HEMATOPOIESIS_STEM_CELL_LONG_TERM	IVANOVA_HEMATOPOIESIS_STEM_CELL_LONG_TERM		289	-0.378956	-1.84501	0	0.0315601	0.837	2583	tags=28%, list=14%, signal=32%
TURASHVILI_BREAST_DUCTAL_CARCINOMA_VS_DUCTAL_NORMAL_DN	TURASHVILI_BREAST_DUCTAL_CARCINOMA_VS_DUCTAL_NORMAL_DN		176	-0.473618	-1.84376	0.00195312	0.0318814	0.841	2690	tags=32%, list=14%, signal=37%
OISHI_CHOLANGIOMA_STEM_CELL_LIKE_DN	OISHI_CHOLANGIOMA_STEM_CELL_LIKE_DN		265	-0.454162	-1.84336	0.00400802	0.0319213	0.841	2111	tags=31%, list=11%, signal=34%
CHANG_POU5F1_TARGETS_UP	CHANG_POU5F1_TARGETS_UP		15	-0.671563	-1.84318	0.0103306	0.0318834	0.841	1497	tags=53%, list=8%, signal=58%
TONKS_TARGETS_OF_RUNX1_RUNX1T1_FUSION_GRANULOCYTE_DN	TONKS_TARGETS_OF_RUNX1_RUNX1T1_FUSION_GRANULOCYTE_DN		16	-0.718963	-1.84313	0.0147059	0.0317956	0.841	3707	tags=69%, list=20%, signal=86%
CHIARADONNA_NEOPLASTIC_TRANSFORMATION_CDC25_UP	CHIARADONNA_NEOPLASTIC_TRANSFORMATION_CDC25_UP		117	-0.462639	-1.84304	0.00408998	0.0317323	0.841	2117	tags=33%, list=11%, signal=37%
VALK_AML_CLUSTER_10	VALK_AML_CLUSTER_10		30	-0.587754	-1.84159	0.00852879	0.0320643	0.844	2137	tags=50%, list=11%, signal=56%
SCHLESINGER_H3K27ME3_IN_NORMAL_AND_METHYLATED_IN_CANCER	SCHLESINGER_H3K27ME3_IN_NORMAL_AND_METHYLATED_IN_CANCER		27	-0.591692	-1.84136	0	0.0320467	0.844	4019	tags=52%, list=21%, signal=66%
GARGALOVIC_RESPONSE_TO_OXIDIZED_PHOSPHOLIPIDS_RED_DN	GARGALOVIC_RESPONSE_TO_OXIDIZED_PHOSPHOLIPIDS_RED_DN		24	-0.607489	-1.83973	0.00420168	0.0325249	0.848	2821	tags=50%, list=15%, signal=59%
ZHENG_FOXP3_TARGETS_IN_T_LYMPHOCYTE_DN	ZHENG_FOXP3_TARGETS_IN_T_LYMPHOCYTE_DN		33	-0.659371	-1.83799	0.00622407	0.0329878	0.85	3104	tags=55%, list=17%, signal=65%
KEEN_RESPONSE_TO_ROSIGLITAZONE_DN	KEEN_RESPONSE_TO_ROSIGLITAZONE_DN		103	-0.522942	-1.83579	0.0040568	0.0334711	0.855	2967	tags=38%, list=16%, signal=45%
VANDESLUIS_COMMD1_TARGETS_GROUP_3_DN	VANDESLUIS_COMMD1_TARGETS_GROUP_3_DN		37	-0.559033	-1.83554	0.00202429	0.0334365	0.855	2533	tags=35%, list=14%, signal=41%
KEGG_CELL_ADHESION_MOLECULES_CAMS	KEGG_CELL_ADHESION_MOLECULES_CAMS		127	-0.529423	-1.83511	0.0133929	0.0334681	0.856	3632	tags=43%, list=19%, signal=53%
FIGUEROA_AML_METHYLATION_CLUSTER_1_UP	FIGUEROA_AML_METHYLATION_CLUSTER_1_UP		105	-0.427655	-1.835	0	0.033402	0.856	2621	tags=27%, list=14%, signal=31%
ZHAN_MULTIPLE_MYELOMA_DN	ZHAN_MULTIPLE_MYELOMA_DN		41	-0.583158	-1.83411	0.0083682	0.0335403	0.857	4642	tags=59%, list=25%, signal=78%
LIU_VAV3_PROSTATE_CARCINOGENESIS_UP	LIU_VAV3_PROSTATE_CARCINOGENESIS_UP		87	-0.519374	-1.83345	0.0125786	0.0336086	0.859	2662	tags=41%, list=14%, signal=48%
DAVICIONI_RHABDOMYOSARCOMA_PAX_FOXO1_FUSION_DN	DAVICIONI_RHABDOMYOSARCOMA_PAX_FOXO1_FUSION_DN		15	-0.653268	-1.83323	0.00194932	0.0335582	0.86	3933	tags=53%, list=21%, signal=67%
OSADA_ASCL1_TARGETS_DN	OSADA_ASCL1_TARGETS_DN		23	-0.637204	-1.83305	0.004158	0.0335491	0.863	2303	tags=52%, list=12%, signal=59%
NAKAMURA_ADIPOGENESIS_EARLY_UP	NAKAMURA_ADIPOGENESIS_EARLY_UP		61	-0.514071	-1.83142	0.002079	0.0340209	0.872	2446	tags=38%, list=13%, signal=43%
ZIRN_TRETINOIN_RESPONSE_WT1_UP	ZIRN_TRETINOIN_RESPONSE_WT1_UP		22	-0.607563	-1.83097	0.00833333	0.0340498	0.874	2247	tags=45%, list=12%, signal=52%
LINDGREN_BLADDER_CANCER_CLUSTER_2A_DN	LINDGREN_BLADDER_CANCER_CLUSTER_2A_DN		130	-0.498524	-1.82939	0.0117878	0.0344206	0.878	3251	tags=43%, list=17%, signal=52%
BOYLAN_MULTIPLE_MYELOMA_PCA1_UP	BOYLAN_MULTIPLE_MYELOMA_PCA1_UP		94	-0.510107	-1.8289	0.00833333	0.0344896	0.879	3145	tags=37%, list=17%, signal=45%
DAVIES_MULTIPLE_MYELOMA_VS_MGUS_DN	DAVIES_MULTIPLE_MYELOMA_VS_MGUS_DN		28	-0.642895	-1.82852	0.0123457	0.0344759	0.879	4286	tags=64%, list=23%, signal=83%
DAVICIONI_PAX_FOXO1_SIGNATURE_IN_ARMS_DN	DAVICIONI_PAX_FOXO1_SIGNATURE_IN_ARMS_DN		20	-0.603154	-1.82812	0	0.0344884	0.879	2247	tags=45%, list=12%, signal=51%
CHIARADONNA_NEOPLASTIC_TRANSFORMATION_KRAS_DN	CHIARADONNA_NEOPLASTIC_TRANSFORMATION_KRAS_DN		139	-0.478535	-1.8271	0.0103734	0.0347816	0.879	3436	tags=42%, list=18%, signal=51%
LEIN_ASTROCYTE_MARKERS	LEIN_ASTROCYTE_MARKERS		40	-0.571624	-1.82694	0.00422833	0.0347203	0.879	3451	tags=50%, list=18%, signal=61%
TONKS_TARGETS_OF_RUNX1_RUNX1T1_FUSION_ERYTHROCYTE_UP	TONKS_TARGETS_OF_RUNX1_RUNX1T1_FUSION_ERYTHROCYTE_UP		151	-0.475294	-1.82416	0.0115607	0.035515	0.885	4109	tags=47%, list=22%, signal=60%
TONKS_TARGETS_OF_RUNX1_RUNX1T1_FUSION_MONOCYTE_DN	TONKS_TARGETS_OF_RUNX1_RUNX1T1_FUSION_MONOCYTE_DN		52	-0.583879	-1.82271	0.0127932	0.035923	0.888	3148	tags=50%, list=17%, signal=60%
WANG_LSD1_TARGETS_UP	WANG_LSD1_TARGETS_UP		23	-0.56877	-1.82264	0.00412371	0.0358578	0.889	2786	tags=39%, list=15%, signal=46%
NIELSEN_MALIGNAT_FIBROUS_HISTIOCYTOMA_UP	NIELSEN_MALIGNAT_FIBROUS_HISTIOCYTOMA_UP		18	-0.73178	-1.82004	0.0119522	0.0365985	0.895	1632	tags=50%, list=9%, signal=55%
COATES_MACROPHAGE_M1_VS_M2_UP	COATES_MACROPHAGE_M1_VS_M2_UP		76	-0.463918	-1.81961	0.00417537	0.0366573	0.896	2690	tags=33%, list=14%, signal=38%
ROSS_ACUTE_MYELOID_LEUKEMIA_CBF	ROSS_ACUTE_MYELOID_LEUKEMIA_CBF		80	-0.492552	-1.81845	0.00843882	0.0369602	0.897	3560	tags=41%, list=19%, signal=51%
CHEBOTAEV_GR_TARGETS_UP	CHEBOTAEV_GR_TARGETS_UP		73	-0.469623	-1.81845	0.00204499	0.0368519	0.897	1305	tags=25%, list=7%, signal=26%
VANHARANTA_UTERINE_FIBROID_UP	VANHARANTA_UTERINE_FIBROID_UP		44	-0.549377	-1.81791	0.0021097	0.0369191	0.897	3695	tags=57%, list=20%, signal=71%
REACTOME_INTEGRIN_CELL_SURFACE_INTERACTIONS	REACTOME_INTEGRIN_CELL_SURFACE_INTERACTIONS		77	-0.526424	-1.81634	0.012	0.0373282	0.902	2337	tags=40%, list=12%, signal=46%
RAGHAVACHARI_PLATELET_SPECIFIC_GENES	RAGHAVACHARI_PLATELET_SPECIFIC_GENES		67	-0.505297	-1.81593	0.00202429	0.0373776	0.903	2886	tags=34%, list=15%, signal=40%
CLASPER_LYMPHATIC_VESSELS_DURING_METASTASIS_UP	CLASPER_LYMPHATIC_VESSELS_DURING_METASTASIS_UP		18	-0.676958	-1.81334	0.0145833	0.0381974	0.904	2595	tags=56%, list=14%, signal=64%
KEGG_ARRHYTHMOGENIC_RIGHT_VENTRICULAR_CARDIOMYOPATHY_ARVC	KEGG_ARRHYTHMOGENIC_RIGHT_VENTRICULAR_CARDIOMYOPATHY_ARVC		74	-0.509864	-1.81291	0.0101833	0.0382595	0.904	2717	tags=42%, list=15%, signal=49%
ISSAEVA_MLL2_TARGETS	ISSAEVA_MLL2_TARGETS		56	-0.519352	-1.81248	0.00817996	0.0382446	0.904	2783	tags=38%, list=15%, signal=44%
YAMASHITA_METHYLATED_IN_PROSTATE_CANCER	YAMASHITA_METHYLATED_IN_PROSTATE_CANCER		55	-0.522636	-1.81044	0.00824742	0.0389118	0.906	5975	tags=65%, list=32%, signal=96%
WINZEN_DEGRADED_VIA_KHSRP	WINZEN_DEGRADED_VIA_KHSRP		97	-0.499812	-1.81024	0.0077821	0.0388833	0.906	3598	tags=42%, list=19%, signal=52%
BURTON_ADIPOGENESIS_8	BURTON_ADIPOGENESIS_8		84	-0.508491	-1.80969	0.013834	0.038965	0.906	3217	tags=42%, list=17%, signal=50%
AZARE_NEOPLASTIC_TRANSFORMATION_BY_STAT3_UP	AZARE_NEOPLASTIC_TRANSFORMATION_BY_STAT3_UP		115	-0.482762	-1.80908	0.00598802	0.0390568	0.907	3432	tags=40%, list=18%, signal=49%
BROWNE_HCMV_INFECTION_48HR_DN	BROWNE_HCMV_INFECTION_48HR_DN		478	-0.376587	-1.80584	0	0.0400681	0.912	2847	tags=29%, list=15%, signal=33%
REACTOME_AXON_GUIDANCE	REACTOME_AXON_GUIDANCE		239	-0.424383	-1.80488	0.00400802	0.04026	0.913	3244	tags=36%, list=17%, signal=43%
CHEN_LVAD_SUPPORT_OF_FAILING_HEART_DN	CHEN_LVAD_SUPPORT_OF_FAILING_HEART_DN		42	-0.553675	-1.80313	0.00400802	0.0407424	0.914	3033	tags=48%, list=16%, signal=57%
REACTOME_VOLTAGE_GATED_POTASSIUM_CHANNELS	REACTOME_VOLTAGE_GATED_POTASSIUM_CHANNELS		42	-0.577655	-1.80305	0.00821355	0.0406644	0.914	4069	tags=50%, list=22%, signal=64%
GRADE_COLON_AND_RECTAL_CANCER_DN	GRADE_COLON_AND_RECTAL_CANCER_DN		96	-0.458391	-1.80291	0.002	0.0406041	0.914	2631	tags=32%, list=14%, signal=37%
ABRAHAM_ALPC_VS_MULTIPLE_MYELOMA_UP	ABRAHAM_ALPC_VS_MULTIPLE_MYELOMA_UP		26	-0.605786	-1.80287	0.0122449	0.0405013	0.914	2247	tags=35%, list=12%, signal=39%
RICKMAN_HEAD_AND_NECK_CANCER_A	RICKMAN_HEAD_AND_NECK_CANCER_A		94	-0.477106	-1.80269	0	0.0404604	0.914	2857	tags=32%, list=15%, signal=37%
TING_SILENCED_BY_DICER	TING_SILENCED_BY_DICER		28	-0.575217	-1.80217	0.00821355	0.0405183	0.914	2504	tags=43%, list=13%, signal=49%
WIERENGA_STAT5A_TARGETS_GROUP2	WIERENGA_STAT5A_TARGETS_GROUP2		56	-0.546112	-1.80035	0.010352	0.0410775	0.916	4370	tags=54%, list=23%, signal=70%
ZIRN_TRETINOIN_RESPONSE_UP	ZIRN_TRETINOIN_RESPONSE_UP		20	-0.636009	-1.79423	0.00793651	0.043265	0.93	3224	tags=50%, list=17%, signal=60%
LEE_NEURAL_CREST_STEM_CELL_DN	LEE_NEURAL_CREST_STEM_CELL_DN		111	-0.426103	-1.79393	0.00194932	0.0432486	0.932	3405	tags=32%, list=18%, signal=38%
TAKEDA_TARGETS_OF_NUP98_HOXA9_FUSION_3D_DN	TAKEDA_TARGETS_OF_NUP98_HOXA9_FUSION_3D_DN		27	-0.597848	-1.7938	0.0160321	0.0431727	0.932	2567	tags=44%, list=14%, signal=51%
REACTOME_PLATELET_ACTIVATION_SIGNALING_AND_AGGREGATION	REACTOME_PLATELET_ACTIVATION_SIGNALING_AND_AGGREGATION		196	-0.437484	-1.79342	0.00414938	0.0431679	0.933	2647	tags=30%, list=14%, signal=35%
VERRECCHIA_EARLY_RESPONSE_TO_TGFB1	VERRECCHIA_EARLY_RESPONSE_TO_TGFB1		58	-0.555566	-1.79339	0.0387755	0.0430617	0.933	2679	tags=48%, list=14%, signal=56%
REACTOME_ACTIVATED_POINT_MUTANTS_OF_FGFR2	REACTOME_ACTIVATED_POINT_MUTANTS_OF_FGFR2		16	-0.682435	-1.79307	0.00606061	0.0430556	0.933	1185	tags=31%, list=6%, signal=33%
GOUYER_TATI_TARGETS_DN	GOUYER_TATI_TARGETS_DN		16	-0.677018	-1.79303	0.0105263	0.0429497	0.933	1397	tags=31%, list=7%, signal=34%
MCCABE_HOXC6_TARGETS_DN	MCCABE_HOXC6_TARGETS_DN		20	-0.619483	-1.79279	0.00206186	0.0429065	0.933	2306	tags=50%, list=12%, signal=57%
HADDAD_T_LYMPHOCYTE_AND_NK_PROGENITOR_UP	HADDAD_T_LYMPHOCYTE_AND_NK_PROGENITOR_UP		73	-0.488679	-1.79177	0	0.0432008	0.935	2925	tags=38%, list=16%, signal=45%
WALLACE_PROSTATE_CANCER_RACE_UP	WALLACE_PROSTATE_CANCER_RACE_UP		268	-0.556904	-1.79168	0.0489796	0.0431051	0.935	3320	tags=46%, list=18%, signal=55%
CHYLA_CBFA2T3_TARGETS_UP	CHYLA_CBFA2T3_TARGETS_UP		365	-0.411141	-1.79096	0.00419287	0.0432813	0.935	3456	tags=34%, list=18%, signal=41%
REACTOME_KERATAN_SULFATE_BIOSYNTHESIS	REACTOME_KERATAN_SULFATE_BIOSYNTHESIS		25	-0.557755	-1.78989	0.0100402	0.0435924	0.937	1908	tags=36%, list=10%, signal=40%
WINNEPENNINCKX_MELANOMA_METASTASIS_DN	WINNEPENNINCKX_MELANOMA_METASTASIS_DN		40	-0.563112	-1.78848	0.0261569	0.0440216	0.939	4050	tags=55%, list=22%, signal=70%
GRAHAM_CML_QUIESCENT_VS_NORMAL_QUIESCENT_DN	GRAHAM_CML_QUIESCENT_VS_NORMAL_QUIESCENT_DN		44	-0.541857	-1.78779	0.0106157	0.0442067	0.939	3602	tags=41%, list=19%, signal=51%
REACTOME_NUCLEOTIDE_LIKE_PURINERGIC_RECEPTORS	REACTOME_NUCLEOTIDE_LIKE_PURINERGIC_RECEPTORS		15	-0.659288	-1.78739	0.00614754	0.0442349	0.939	3752	tags=67%, list=20%, signal=83%
DASU_IL6_SIGNALING_SCAR_DN	DASU_IL6_SIGNALING_SCAR_DN		16	-0.691575	-1.78661	0.0039604	0.0444353	0.941	1142	tags=44%, list=6%, signal=47%
REACTOME_G_ALPHA_Z_SIGNALLING_EVENTS	REACTOME_G_ALPHA_Z_SIGNALLING_EVENTS		44	-0.541407	-1.78122	0.00627615	0.0463602	0.948	3801	tags=45%, list=20%, signal=57%
ZHAN_MULTIPLE_MYELOMA_MF_DN	ZHAN_MULTIPLE_MYELOMA_MF_DN		36	-0.528157	-1.78103	0.0120968	0.0462898	0.948	3214	tags=42%, list=17%, signal=50%
BOQUEST_STEM_CELL_DN	BOQUEST_STEM_CELL_DN		210	-0.467957	-1.78065	0.0187891	0.0463216	0.949	3130	tags=38%, list=17%, signal=45%
SCHAEFFER_PROSTATE_DEVELOPMENT_6HR_UP	SCHAEFFER_PROSTATE_DEVELOPMENT_6HR_UP		158	-0.431566	-1.78034	0.00801603	0.0463103	0.951	2604	tags=33%, list=14%, signal=38%
REACTOME_REGULATION_OF_INSULIN_LIKE_GROWTH_FACTOR_IGF_ACTIVITY_BY_INSULIN_LIKE_GROWTH_FACTOR_BINDING_PROTEINS_IGFBPS	REACTOME_REGULATION_OF_INSULIN_LIKE_GROWTH_FACTOR_IGF_ACTIVITY_BY_INSULIN_LIKE_GROWTH_FACTOR_BINDING_PROTEINS_IGFBPS		16	-0.664649	-1.78001	0.00613497	0.0463124	0.952	2774	tags=38%, list=15%, signal=44%
TARTE_PLASMA_CELL_VS_PLASMABLAST_UP	TARTE_PLASMA_CELL_VS_PLASMABLAST_UP		372	-0.402022	-1.7799	0	0.046239	0.952	4677	tags=42%, list=25%, signal=56%
CERVERA_SDHB_TARGETS_2	CERVERA_SDHB_TARGETS_2		105	-0.452999	-1.77815	0.00411523	0.0468494	0.954	3469	tags=35%, list=19%, signal=43%
DIAZ_CHRONIC_MEYLOGENOUS_LEUKEMIA_DN	DIAZ_CHRONIC_MEYLOGENOUS_LEUKEMIA_DN		112	-0.486364	-1.77799	0.0299401	0.0467923	0.954	3847	tags=47%, list=21%, signal=59%
PLASARI_TGFB1_SIGNALING_VIA_NFIC_10HR_UP	PLASARI_TGFB1_SIGNALING_VIA_NFIC_10HR_UP		51	-0.518082	-1.77618	0	0.0473505	0.954	2251	tags=31%, list=12%, signal=36%
WIERENGA_STAT5A_TARGETS_UP	WIERENGA_STAT5A_TARGETS_UP		201	-0.426844	-1.77382	0.00808081	0.0481395	0.959	4370	tags=42%, list=23%, signal=54%
HERNANDEZ_ABERRANT_MITOSIS_BY_DOCETACEL_2NM_DN	HERNANDEZ_ABERRANT_MITOSIS_BY_DOCETACEL_2NM_DN		23	-0.551556	-1.77349	0.00394477	0.0481592	0.959	2591	tags=39%, list=14%, signal=45%
PEREZ_TP63_TARGETS	PEREZ_TP63_TARGETS		321	-0.409042	-1.77171	0.002079	0.0487753	0.96	3737	tags=36%, list=20%, signal=44%
FINAK_BREAST_CANCER_SDPP_SIGNATURE	FINAK_BREAST_CANCER_SDPP_SIGNATURE		23	-0.624343	-1.76583	0.01875	0.0511386	0.964	3268	tags=48%, list=17%, signal=58%
FARMER_BREAST_CANCER_CLUSTER_4	FARMER_BREAST_CANCER_CLUSTER_4		19	-0.893419	-1.7648	0.00205761	0.0514691	0.967	2012	tags=100%, list=11%, signal=112%
THEODOROU_MAMMARY_TUMORIGENESIS	THEODOROU_MAMMARY_TUMORIGENESIS		29	-0.550247	-1.76378	0.00401606	0.0518224	0.968	2312	tags=34%, list=12%, signal=39%
WEINMANN_ADAPTATION_TO_HYPOXIA_DN	WEINMANN_ADAPTATION_TO_HYPOXIA_DN		39	-0.530554	-1.76261	0.0134615	0.0521771	0.968	3593	tags=44%, list=19%, signal=54%
LI_WILMS_TUMOR	LI_WILMS_TUMOR		25	-0.575533	-1.76221	0.00390625	0.0522047	0.969	1934	tags=32%, list=10%, signal=36%
OUELLET_CULTURED_OVARIAN_CANCER_INVASIVE_VS_LMP_DN	OUELLET_CULTURED_OVARIAN_CANCER_INVASIVE_VS_LMP_DN		31	-0.542808	-1.76219	0.0144928	0.0520974	0.97	848	tags=23%, list=5%, signal=24%
BROWNE_HCMV_INFECTION_12HR_DN	BROWNE_HCMV_INFECTION_12HR_DN		95	-0.437041	-1.76	0.00395257	0.0529171	0.97	3154	tags=37%, list=17%, signal=44%
WANG_RESPONSE_TO_BEXAROTENE_DN	WANG_RESPONSE_TO_BEXAROTENE_DN		29	-0.537529	-1.75999	0.0104822	0.0527814	0.97	2517	tags=41%, list=13%, signal=48%
SETLUR_PROSTATE_CANCER_TMPRSS2_ERG_FUSION_DN	SETLUR_PROSTATE_CANCER_TMPRSS2_ERG_FUSION_DN		19	-0.606912	-1.75979	0.00849257	0.052724	0.97	5567	tags=68%, list=30%, signal=97%
WOTTON_RUNX_TARGETS_DN	WOTTON_RUNX_TARGETS_DN		27	-0.535825	-1.75704	0.0060241	0.0538421	0.971	1492	tags=30%, list=8%, signal=32%
REACTOME_NCAM_SIGNALING_FOR_NEURITE_OUT_GROWTH	REACTOME_NCAM_SIGNALING_FOR_NEURITE_OUT_GROWTH		64	-0.482985	-1.75568	0.0103734	0.0542914	0.971	3365	tags=45%, list=18%, signal=55%
KEGG_HEDGEHOG_SIGNALING_PATHWAY	KEGG_HEDGEHOG_SIGNALING_PATHWAY		56	-0.476546	-1.75509	0.00994036	0.0543846	0.972	3452	tags=36%, list=18%, signal=44%
JAATINEN_HEMATOPOIETIC_STEM_CELL_UP	JAATINEN_HEMATOPOIETIC_STEM_CELL_UP		289	-0.391261	-1.75318	0.00209644	0.055149	0.973	2254	tags=26%, list=12%, signal=29%
MIKKELSEN_NPC_LCP_WITH_H3K4ME3	MIKKELSEN_NPC_LCP_WITH_H3K4ME3		50	-0.454205	-1.75202	0.00434783	0.0555932	0.974	3389	tags=34%, list=18%, signal=41%
TANG_SENESCENCE_TP53_TARGETS_UP	TANG_SENESCENCE_TP53_TARGETS_UP		32	-0.497413	-1.75167	0.00829876	0.0555998	0.974	3731	tags=41%, list=20%, signal=51%
NIELSEN_LEIOMYOSARCOMA_CNN1_UP	NIELSEN_LEIOMYOSARCOMA_CNN1_UP		18	-0.84282	-1.75104	0.0236052	0.0558074	0.974	839	tags=67%, list=4%, signal=70%
PEREZ_TP53_AND_TP63_TARGETS	PEREZ_TP53_AND_TP63_TARGETS		188	-0.42886	-1.75099	0.0103734	0.0557054	0.974	3498	tags=38%, list=19%, signal=46%
RORIE_TARGETS_OF_EWSR1_FLI1_FUSION_DN	RORIE_TARGETS_OF_EWSR1_FLI1_FUSION_DN		29	-0.635459	-1.74982	0.0192719	0.0561082	0.975	4371	tags=69%, list=23%, signal=90%
PLASARI_TGFB1_SIGNALING_VIA_NFIC_1HR_UP	PLASARI_TGFB1_SIGNALING_VIA_NFIC_1HR_UP		33	-0.51003	-1.74886	0.00212766	0.0564508	0.975	3103	tags=42%, list=17%, signal=51%
REN_ALVEOLAR_RHABDOMYOSARCOMA_UP	REN_ALVEOLAR_RHABDOMYOSARCOMA_UP		95	-0.456354	-1.74783	0	0.0567374	0.976	3728	tags=38%, list=20%, signal=47%
MAHADEVAN_IMATINIB_RESISTANCE_DN	MAHADEVAN_IMATINIB_RESISTANCE_DN		18	-0.649289	-1.74781	0.0131004	0.0566116	0.976	1595	tags=50%, list=9%, signal=55%
MIKKELSEN_ES_HCP_WITH_H3_UNMETHYLATED	MIKKELSEN_ES_HCP_WITH_H3_UNMETHYLATED		57	-0.516506	-1.74645	0.0104822	0.0571023	0.976	2208	tags=26%, list=12%, signal=30%
PID_SHP2_PATHWAY	PID_SHP2_PATHWAY		57	-0.476158	-1.74534	0.0160321	0.0574621	0.977	3452	tags=35%, list=18%, signal=43%
RAMALHO_STEMNESS_DN	RAMALHO_STEMNESS_DN		70	-0.504495	-1.74531	0.0191489	0.0573343	0.977	3267	tags=43%, list=17%, signal=52%
GYORFFY_MITOXANTRONE_RESISTANCE	GYORFFY_MITOXANTRONE_RESISTANCE		49	-0.47333	-1.74502	0.00421053	0.0573379	0.977	4311	tags=51%, list=23%, signal=66%
WATTEL_AUTONOMOUS_THYROID_ADENOMA_DN	WATTEL_AUTONOMOUS_THYROID_ADENOMA_DN		52	-0.482549	-1.74368	0.0204499	0.0578533	0.977	3306	tags=38%, list=18%, signal=47%
GAUSSMANN_MLL_AF4_FUSION_TARGETS_E_DN	GAUSSMANN_MLL_AF4_FUSION_TARGETS_E_DN		22	-0.541013	-1.74306	0.00423729	0.0579985	0.977	1966	tags=32%, list=11%, signal=36%
SAMOLS_TARGETS_OF_KHSV_MIRNAS_DN	SAMOLS_TARGETS_OF_KHSV_MIRNAS_DN		56	-0.457917	-1.74259	0.0059761	0.0580801	0.978	2640	tags=29%, list=14%, signal=33%
URS_ADIPOCYTE_DIFFERENTIATION_DN	URS_ADIPOCYTE_DIFFERENTIATION_DN		30	-0.575368	-1.74244	0.0204082	0.058002	0.978	1543	tags=40%, list=8%, signal=44%
THUM_SYSTOLIC_HEART_FAILURE_UP	THUM_SYSTOLIC_HEART_FAILURE_UP		384	-0.426341	-1.74201	0.0162602	0.0580741	0.978	2595	tags=33%, list=14%, signal=38%
REACTOME_CA_DEPENDENT_EVENTS	REACTOME_CA_DEPENDENT_EVENTS		28	-0.537406	-1.74102	0.0192308	0.0583662	0.979	1629	tags=32%, list=9%, signal=35%
LOPES_METHYLATED_IN_COLON_CANCER_UP	LOPES_METHYLATED_IN_COLON_CANCER_UP		27	-0.547112	-1.74048	0.0152838	0.0585271	0.979	2206	tags=33%, list=12%, signal=38%
REACTOME_KERATAN_SULFATE_KERATIN_METABOLISM	REACTOME_KERATAN_SULFATE_KERATIN_METABOLISM		29	-0.532119	-1.73927	0.0223577	0.0589327	0.98	1908	tags=31%, list=10%, signal=35%
BERENJENO_TRANSFORMED_BY_RHOA_FOREVER_UP	BERENJENO_TRANSFORMED_BY_RHOA_FOREVER_UP		19	-0.615459	-1.73631	0.0164271	0.0601212	0.98	1974	tags=32%, list=11%, signal=35%
ZHU_CMV_8_HR_DN	ZHU_CMV_8_HR_DN		52	-0.489137	-1.73629	0.0188679	0.059985	0.98	1820	tags=29%, list=10%, signal=32%
GRANDVAUX_IRF3_TARGETS_DN	GRANDVAUX_IRF3_TARGETS_DN		19	-0.563648	-1.73616	0.0141988	0.0599122	0.98	1459	tags=37%, list=8%, signal=40%
DANG_REGULATED_BY_MYC_DN	DANG_REGULATED_BY_MYC_DN		243	-0.410769	-1.73406	0.0060241	0.0607833	0.983	2281	tags=25%, list=12%, signal=28%
HUMMERICH_SKIN_CANCER_PROGRESSION_DN	HUMMERICH_SKIN_CANCER_PROGRESSION_DN		100	-0.435642	-1.73384	0.0143737	0.0607671	0.983	2495	tags=33%, list=13%, signal=38%
KEGG_MELANOGENESIS	KEGG_MELANOGENESIS		101	-0.411768	-1.73358	0.00204918	0.0607844	0.983	2754	tags=28%, list=15%, signal=32%
LA_MEN1_TARGETS	LA_MEN1_TARGETS		23	-0.555862	-1.73171	0.0185567	0.0615153	0.983	2286	tags=39%, list=12%, signal=45%
LI_WILMS_TUMOR_VS_FETAL_KIDNEY_1_UP	LI_WILMS_TUMOR_VS_FETAL_KIDNEY_1_UP		177	-0.430162	-1.73149	0.0121212	0.0614851	0.983	2301	tags=29%, list=12%, signal=33%
PID_ALK1_PATHWAY	PID_ALK1_PATHWAY		25	-0.541713	-1.7312	0.0116959	0.061478	0.983	2140	tags=36%, list=11%, signal=41%
WIEDERSCHAIN_TARGETS_OF_BMI1_AND_PCGF2	WIEDERSCHAIN_TARGETS_OF_BMI1_AND_PCGF2		56	-0.522237	-1.73047	0.0139165	0.0616743	0.983	2042	tags=30%, list=11%, signal=34%
SATO_SILENCED_BY_METHYLATION_IN_PANCREATIC_CANCER_1	SATO_SILENCED_BY_METHYLATION_IN_PANCREATIC_CANCER_1		401	-0.369706	-1.72937	0.00205761	0.0620285	0.983	3652	tags=29%, list=20%, signal=35%
WU_ALZHEIMER_DISEASE_DN	WU_ALZHEIMER_DISEASE_DN		18	-0.576051	-1.72891	0.0162272	0.0621068	0.983	1878	tags=39%, list=10%, signal=43%
REACTOME_NEURONAL_SYSTEM	REACTOME_NEURONAL_SYSTEM		274	-0.412039	-1.72855	0.00621118	0.0621575	0.983	3969	tags=35%, list=21%, signal=43%
VALK_AML_WITH_FLT3_ITD	VALK_AML_WITH_FLT3_ITD		36	-0.482837	-1.72835	0.00798403	0.0620797	0.983	2742	tags=36%, list=15%, signal=42%
RADMACHER_AML_PROGNOSIS	RADMACHER_AML_PROGNOSIS		74	-0.441566	-1.72697	0.0106157	0.0625278	0.983	1875	tags=24%, list=10%, signal=27%
KIM_WT1_TARGETS_12HR_UP	KIM_WT1_TARGETS_12HR_UP		154	-0.432586	-1.72581	0.0101626	0.0630834	0.983	1909	tags=27%, list=10%, signal=30%
WANG_NEOPLASTIC_TRANSFORMATION_BY_CCND1_MYC	WANG_NEOPLASTIC_TRANSFORMATION_BY_CCND1_MYC		21	-0.59386	-1.72568	0.0147368	0.0629821	0.983	2562	tags=48%, list=14%, signal=55%
KUNINGER_IGF1_VS_PDGFB_TARGETS_DN	KUNINGER_IGF1_VS_PDGFB_TARGETS_DN		43	-0.482542	-1.72417	0.0105932	0.0636487	0.983	2442	tags=42%, list=13%, signal=48%
MCDOWELL_ACUTE_LUNG_INJURY_DN	MCDOWELL_ACUTE_LUNG_INJURY_DN		47	-0.483726	-1.72306	0.0021692	0.0640267	0.983	3221	tags=38%, list=17%, signal=46%
GAJATE_RESPONSE_TO_TRABECTEDIN_UP	GAJATE_RESPONSE_TO_TRABECTEDIN_UP		65	-0.46833	-1.7223	0.010352	0.0642482	0.983	2312	tags=31%, list=12%, signal=35%
NIELSEN_LIPOSARCOMA_UP	NIELSEN_LIPOSARCOMA_UP		18	-0.600211	-1.72198	0.0102459	0.0642774	0.984	3109	tags=50%, list=17%, signal=60%
PID_LPA4_PATHWAY	PID_LPA4_PATHWAY		15	-0.657207	-1.7216	0.00852879	0.0643369	0.984	3718	tags=67%, list=20%, signal=83%
REACTOME_GLUCAGON_TYPE_LIGAND_RECEPTORS	REACTOME_GLUCAGON_TYPE_LIGAND_RECEPTORS		33	-0.545877	-1.72012	0.00626305	0.064911	0.985	3346	tags=42%, list=18%, signal=52%
DAIRKEE_TERT_TARGETS_DN	DAIRKEE_TERT_TARGETS_DN		112	-0.441342	-1.71973	0.00410678	0.0649435	0.985	2445	tags=30%, list=13%, signal=35%
SEITZ_NEOPLASTIC_TRANSFORMATION_BY_8P_DELETION_UP	SEITZ_NEOPLASTIC_TRANSFORMATION_BY_8P_DELETION_UP		73	-0.507843	-1.71967	0.0321199	0.0648354	0.985	2657	tags=32%, list=14%, signal=37%
TAKEDA_TARGETS_OF_NUP98_HOXA9_FUSION_10D_DN	TAKEDA_TARGETS_OF_NUP98_HOXA9_FUSION_10D_DN		129	-0.487593	-1.71885	0.0246407	0.0650574	0.985	4323	tags=48%, list=23%, signal=62%
RODWELL_AGING_KIDNEY_UP	RODWELL_AGING_KIDNEY_UP		437	-0.456551	-1.71864	0.0492813	0.0650168	0.985	3501	tags=42%, list=19%, signal=50%
NAKAYAMA_FGF2_TARGETS	NAKAYAMA_FGF2_TARGETS		27	-0.522753	-1.71806	0.0128755	0.0651611	0.985	2422	tags=44%, list=13%, signal=51%
GHANDHI_DIRECT_IRRADIATION_DN	GHANDHI_DIRECT_IRRADIATION_DN		32	-0.52426	-1.71443	0.0122699	0.0667534	0.985	1763	tags=28%, list=9%, signal=31%
LEE_TARGETS_OF_PTCH1_AND_SUFU_DN	LEE_TARGETS_OF_PTCH1_AND_SUFU_DN		82	-0.432853	-1.71419	0.00790514	0.0667322	0.985	3008	tags=34%, list=16%, signal=41%
LIU_TARGETS_OF_VMYB_VS_CMYB_DN	LIU_TARGETS_OF_VMYB_VS_CMYB_DN		41	-0.500373	-1.71287	0.0213178	0.0672691	0.985	3841	tags=51%, list=21%, signal=64%
PID_S1P_S1P1_PATHWAY	PID_S1P_S1P1_PATHWAY		21	-0.588904	-1.71284	0.0226804	0.0671345	0.985	2612	tags=48%, list=14%, signal=55%
DURAND_STROMA_NS_UP	DURAND_STROMA_NS_UP		154	-0.371776	-1.71246	0	0.0671982	0.985	3405	tags=36%, list=18%, signal=43%
ROSS_LEUKEMIA_WITH_MLL_FUSIONS	ROSS_LEUKEMIA_WITH_MLL_FUSIONS		74	-0.446041	-1.70982	0.0103306	0.0685124	0.987	3111	tags=35%, list=17%, signal=42%
MIKKELSEN_NPC_HCP_WITH_H3K4ME3_AND_H3K27ME3	MIKKELSEN_NPC_HCP_WITH_H3K4ME3_AND_H3K27ME3		200	-0.392898	-1.70846	0.00210084	0.0691425	0.989	3182	tags=31%, list=17%, signal=37%
ABE_INNER_EAR	ABE_INNER_EAR		46	-0.516368	-1.70758	0.0217391	0.0694323	0.989	2529	tags=33%, list=14%, signal=38%
REACTOME_MYOGENESIS	REACTOME_MYOGENESIS		25	-0.526016	-1.70548	0.0174419	0.0703993	0.99	3694	tags=48%, list=20%, signal=60%
CROONQUIST_NRAS_SIGNALING_UP	CROONQUIST_NRAS_SIGNALING_UP		38	-0.575969	-1.705	0.04	0.070534	0.991	2477	tags=45%, list=13%, signal=51%
REACTOME_G_PROTEIN_ACTIVATION	REACTOME_G_PROTEIN_ACTIVATION		26	-0.569773	-1.70443	0.0193133	0.0706854	0.991	2817	tags=42%, list=15%, signal=50%
ROSS_AML_WITH_CBFB_MYH11_FUSION	ROSS_AML_WITH_CBFB_MYH11_FUSION		51	-0.520277	-1.70353	0.0169133	0.071004	0.992	3267	tags=47%, list=17%, signal=57%
OHGUCHI_LIVER_HNF4A_TARGETS_UP	OHGUCHI_LIVER_HNF4A_TARGETS_UP		44	-0.491809	-1.70324	0.0164609	0.0710264	0.992	2665	tags=34%, list=14%, signal=40%
PYEON_CANCER_HEAD_AND_NECK_VS_CERVICAL_DN	PYEON_CANCER_HEAD_AND_NECK_VS_CERVICAL_DN		26	-0.626338	-1.70182	0.0165631	0.0716213	0.992	3951	tags=46%, list=21%, signal=58%
VALK_AML_CLUSTER_12	VALK_AML_CLUSTER_12		29	-0.515563	-1.70045	0.0165975	0.072246	0.992	3089	tags=38%, list=17%, signal=45%
PID_HEDGEHOG_2PATHWAY	PID_HEDGEHOG_2PATHWAY		21	-0.584174	-1.6997	0.010395	0.0725266	0.992	3531	tags=62%, list=19%, signal=76%
ZHU_SKIL_TARGETS_UP	ZHU_SKIL_TARGETS_UP		20	-0.609164	-1.6985	0.0177165	0.0730707	0.993	2354	tags=35%, list=13%, signal=40%
LE_SKI_TARGETS_UP	LE_SKI_TARGETS_UP		17	-0.596269	-1.6978	0.0230126	0.0733184	0.993	2446	tags=41%, list=13%, signal=47%
SHIPP_DLBCL_CURED_VS_FATAL_UP	SHIPP_DLBCL_CURED_VS_FATAL_UP		39	-0.472477	-1.69701	0.012474	0.0735719	0.993	3075	tags=31%, list=16%, signal=37%
LEIN_NEURON_MARKERS	LEIN_NEURON_MARKERS		64	-0.504843	-1.69493	0.0141988	0.074544	0.993	3911	tags=48%, list=21%, signal=61%
GOZGIT_ESR1_TARGETS_UP	GOZGIT_ESR1_TARGETS_UP		134	-0.390877	-1.69323	0.00404858	0.0753286	0.993	2777	tags=29%, list=15%, signal=34%
HOSHIDA_LIVER_CANCER_SURVIVAL_UP	HOSHIDA_LIVER_CANCER_SURVIVAL_UP		72	-0.438119	-1.69242	0.00618557	0.0756172	0.993	2946	tags=36%, list=16%, signal=43%
ZHAN_MULTIPLE_MYELOMA_PR_DN	ZHAN_MULTIPLE_MYELOMA_PR_DN		42	-0.566708	-1.6913	0.0209205	0.0760638	0.993	3037	tags=45%, list=16%, signal=54%
KOKKINAKIS_METHIONINE_DEPRIVATION_96HR_UP	KOKKINAKIS_METHIONINE_DEPRIVATION_96HR_UP		113	-0.415548	-1.69124	0.0155642	0.0759497	0.993	2247	tags=27%, list=12%, signal=31%
GRAHAM_NORMAL_QUIESCENT_VS_NORMAL_DIVIDING_UP	GRAHAM_NORMAL_QUIESCENT_VS_NORMAL_DIVIDING_UP		63	-0.483773	-1.69026	0.0199203	0.0763185	0.994	3800	tags=37%, list=20%, signal=46%
NIELSEN_GIST	NIELSEN_GIST		93	-0.434024	-1.68988	0.0167015	0.0763828	0.994	2447	tags=27%, list=13%, signal=31%
SMIRNOV_CIRCULATING_ENDOTHELIOCYTES_IN_CANCER_UP	SMIRNOV_CIRCULATING_ENDOTHELIOCYTES_IN_CANCER_UP		154	-0.461273	-1.6886	0.0320641	0.0770135	0.994	4283	tags=45%, list=23%, signal=58%
DELASERNA_MYOD_TARGETS_DN	DELASERNA_MYOD_TARGETS_DN		54	-0.448307	-1.68696	0.0165631	0.077793	0.994	2369	tags=33%, list=13%, signal=38%
MEISSNER_NPC_HCP_WITH_H3K4ME2	MEISSNER_NPC_HCP_WITH_H3K4ME2		464	-0.365419	-1.68648	0.00207469	0.0779209	0.994	3225	tags=30%, list=17%, signal=35%
KEGG_HEMATOPOIETIC_CELL_LINEAGE	KEGG_HEMATOPOIETIC_CELL_LINEAGE		83	-0.534027	-1.68502	0.0411523	0.0786602	0.994	3889	tags=45%, list=21%, signal=56%
ZHAN_MULTIPLE_MYELOMA_CD1_VS_CD2_UP	ZHAN_MULTIPLE_MYELOMA_CD1_VS_CD2_UP		61	-0.455475	-1.68392	0.0127119	0.0791176	0.994	3244	tags=38%, list=17%, signal=45%
LEIN_PONS_MARKERS	LEIN_PONS_MARKERS		85	-0.426619	-1.68341	0.0105932	0.0792675	0.994	4013	tags=40%, list=21%, signal=51%
KEGG_MELANOMA	KEGG_MELANOMA		71	-0.411013	-1.68276	0.00576923	0.0794736	0.994	1498	tags=23%, list=8%, signal=24%
DAVICIONI_RHABDOMYOSARCOMA_PAX_FOXO1_FUSION_UP	DAVICIONI_RHABDOMYOSARCOMA_PAX_FOXO1_FUSION_UP		59	-0.431337	-1.68275	0.0060241	0.0793149	0.994	2697	tags=31%, list=14%, signal=36%
JEON_SMAD6_TARGETS_UP	JEON_SMAD6_TARGETS_UP		23	-0.576305	-1.68272	0.0365854	0.0791749	0.994	4145	tags=57%, list=22%, signal=73%
LABBE_WNT3A_TARGETS_DN	LABBE_WNT3A_TARGETS_DN		94	-0.397732	-1.68222	0	0.0793183	0.994	3083	tags=33%, list=16%, signal=39%
REACTOME_ENDOGENOUS_STEROLS	REACTOME_ENDOGENOUS_STEROLS		15	-0.657026	-1.6822	0.0269151	0.0791593	0.994	4494	tags=60%, list=24%, signal=79%
KUROZUMI_RESPONSE_TO_ONCOCYTIC_VIRUS_AND_CYCLIC_RGD	KUROZUMI_RESPONSE_TO_ONCOCYTIC_VIRUS_AND_CYCLIC_RGD		21	-0.679216	-1.68132	0.0441767	0.0794825	0.994	4962	tags=71%, list=27%, signal=97%
PAL_PRMT5_TARGETS_DN	PAL_PRMT5_TARGETS_DN		28	-0.50716	-1.68053	0.0219124	0.0797843	0.994	3211	tags=43%, list=17%, signal=52%
PID_INTEGRIN2_PATHWAY	PID_INTEGRIN2_PATHWAY		28	-0.617065	-1.68031	0.0309278	0.0797587	0.994	5093	tags=68%, list=27%, signal=93%
VILIMAS_NOTCH1_TARGETS_DN	VILIMAS_NOTCH1_TARGETS_DN		20	-0.713952	-1.68019	0.0325866	0.0796436	0.994	3424	tags=65%, list=18%, signal=79%
NAKAJIMA_MAST_CELL	NAKAJIMA_MAST_CELL		45	-0.505946	-1.67999	0.0348361	0.0796063	0.995	2774	tags=42%, list=15%, signal=49%
REACTOME_NEUROTRANSMITTER_RECEPTOR_BINDING_AND_DOWNSTREAM_TRANSMISSION_IN_THE_POSTSYNAPTIC_CELL	REACTOME_NEUROTRANSMITTER_RECEPTOR_BINDING_AND_DOWNSTREAM_TRANSMISSION_IN_THE_POSTSYNAPTIC_CELL		135	-0.404834	-1.67975	0.00835073	0.079577	0.995	3139	tags=31%, list=17%, signal=37%
MATTIOLI_MULTIPLE_MYELOMA_WITH_14Q32_TRANSLOCATIONS	MATTIOLI_MULTIPLE_MYELOMA_WITH_14Q32_TRANSLOCATIONS		32	-0.509877	-1.67974	0.0285714	0.0794209	0.995	2087	tags=38%, list=11%, signal=42%
FIGUEROA_AML_METHYLATION_CLUSTER_5_DN	FIGUEROA_AML_METHYLATION_CLUSTER_5_DN		43	-0.44941	-1.67949	0.0192308	0.0793948	0.995	2574	tags=35%, list=14%, signal=40%
MCCLUNG_DELTA_FOSB_TARGETS_2WK	MCCLUNG_DELTA_FOSB_TARGETS_2WK		44	-0.459363	-1.67907	0.020284	0.0795009	0.995	3443	tags=43%, list=18%, signal=53%
REACTOME_GABA_RECEPTOR_ACTIVATION	REACTOME_GABA_RECEPTOR_ACTIVATION		52	-0.445833	-1.67812	0.0165975	0.0799172	0.995	3969	tags=37%, list=21%, signal=46%
ZWANG_CLASS_2_TRANSIENTLY_INDUCED_BY_EGF	ZWANG_CLASS_2_TRANSIENTLY_INDUCED_BY_EGF		43	-0.482875	-1.67771	0.0214844	0.0800193	0.995	3699	tags=40%, list=20%, signal=49%
YAMAZAKI_TCEB3_TARGETS_UP	YAMAZAKI_TCEB3_TARGETS_UP		169	-0.412672	-1.67638	0.0241449	0.080618	0.995	2501	tags=30%, list=13%, signal=34%
CHEMELLO_SOLEUS_VS_EDL_MYOFIBERS_UP	CHEMELLO_SOLEUS_VS_EDL_MYOFIBERS_UP		33	-0.535594	-1.67571	0.0362903	0.0809177	0.995	2408	tags=33%, list=13%, signal=38%
KEGG_BASAL_CELL_CARCINOMA	KEGG_BASAL_CELL_CARCINOMA		55	-0.460302	-1.67461	0.0215686	0.0813684	0.995	3272	tags=35%, list=17%, signal=42%
UZONYI_RESPONSE_TO_LEUKOTRIENE_AND_THROMBIN	UZONYI_RESPONSE_TO_LEUKOTRIENE_AND_THROMBIN		36	-0.609343	-1.67385	0.0545455	0.0816373	0.995	4043	tags=56%, list=22%, signal=71%
CADWELL_ATG16L1_TARGETS_UP	CADWELL_ATG16L1_TARGETS_UP		86	-0.449936	-1.67237	0.013245	0.0823539	0.996	3438	tags=36%, list=18%, signal=44%
ZHENG_IL22_SIGNALING_UP	ZHENG_IL22_SIGNALING_UP		52	-0.490439	-1.67135	0.0218688	0.0828168	0.996	3019	tags=40%, list=16%, signal=48%
REACTOME_INHIBITION_OF_INSULIN_SECRETION_BY_ADRENALINE_NORADRENALINE	REACTOME_INHIBITION_OF_INSULIN_SECRETION_BY_ADRENALINE_NORADRENALINE		25	-0.57702	-1.67091	0.0128755	0.0829561	0.996	2817	tags=44%, list=15%, signal=52%
HOOI_ST7_TARGETS_DN	HOOI_ST7_TARGETS_DN		110	-0.389135	-1.6699	0.00416667	0.0833348	0.996	3269	tags=30%, list=17%, signal=36%
FLORIO_NEOCORTEX_BASAL_RADIAL_GLIA_UP	FLORIO_NEOCORTEX_BASAL_RADIAL_GLIA_UP		365	-0.393062	-1.66951	0.00208768	0.0833917	0.996	3328	tags=29%, list=18%, signal=35%
SHEDDEN_LUNG_CANCER_GOOD_SURVIVAL_A4	SHEDDEN_LUNG_CANCER_GOOD_SURVIVAL_A4		189	-0.400551	-1.66922	0.00809717	0.0833944	0.996	4241	tags=38%, list=23%, signal=48%
EPPERT_HSC_R	EPPERT_HSC_R		111	-0.419129	-1.66757	0.00803213	0.0842475	0.996	2447	tags=28%, list=13%, signal=32%
GARGALOVIC_RESPONSE_TO_OXIDIZED_PHOSPHOLIPIDS_GREY_DN	GARGALOVIC_RESPONSE_TO_OXIDIZED_PHOSPHOLIPIDS_GREY_DN		62	-0.42958	-1.66561	0.0192308	0.0853053	0.996	4425	tags=48%, list=24%, signal=63%
VERRECCHIA_RESPONSE_TO_TGFB1_C2	VERRECCHIA_RESPONSE_TO_TGFB1_C2		25	-0.588965	-1.66308	0.0591837	0.086688	0.996	2593	tags=52%, list=14%, signal=60%
CHEN_ETV5_TARGETS_SERTOLI	CHEN_ETV5_TARGETS_SERTOLI		18	-0.682037	-1.66282	0.0432099	0.0866943	0.996	3007	tags=61%, list=16%, signal=73%
REACTOME_SIGNALING_BY_BMP	REACTOME_SIGNALING_BY_BMP		22	-0.570512	-1.66281	0.0258449	0.0865375	0.996	1967	tags=27%, list=11%, signal=30%
LIAN_LIPA_TARGETS_6M	LIAN_LIPA_TARGETS_6M		71	-0.552473	-1.66208	0.0509554	0.0868006	0.996	4599	tags=58%, list=25%, signal=76%
REACTOME_SIGNALING_BY_PDGF	REACTOME_SIGNALING_BY_PDGF		117	-0.412584	-1.66043	0.0260521	0.0876087	0.997	1848	tags=26%, list=10%, signal=28%
LINDSTEDT_DENDRITIC_CELL_MATURATION_D	LINDSTEDT_DENDRITIC_CELL_MATURATION_D		66	-0.491681	-1.66029	0.0330578	0.0875336	0.997	3632	tags=47%, list=19%, signal=58%
GAUSSMANN_MLL_AF4_FUSION_TARGETS_A_DN	GAUSSMANN_MLL_AF4_FUSION_TARGETS_A_DN		88	-0.393015	-1.6601	0.00426439	0.0874775	0.997	3300	tags=31%, list=18%, signal=37%
KANG_IMMORTALIZED_BY_TERT_UP	KANG_IMMORTALIZED_BY_TERT_UP		87	-0.39889	-1.65963	0.01222	0.0875977	0.997	2117	tags=31%, list=11%, signal=35%
CHUNG_BLISTER_CYTOTOXICITY_DN	CHUNG_BLISTER_CYTOTOXICITY_DN		39	-0.513532	-1.65963	0.0241449	0.0874266	0.997	3965	tags=44%, list=21%, signal=55%
PID_WNT_SIGNALING_PATHWAY	PID_WNT_SIGNALING_PATHWAY		27	-0.526872	-1.65887	0.0178571	0.0876639	0.997	4337	tags=48%, list=23%, signal=63%
KEGG_GLYCOSAMINOGLYCAN_BIOSYNTHESIS_CHONDROITIN_SULFATE	KEGG_GLYCOSAMINOGLYCAN_BIOSYNTHESIS_CHONDROITIN_SULFATE		22	-0.57772	-1.6588	0.0378486	0.0875431	0.997	3661	tags=55%, list=20%, signal=68%
CHIANG_LIVER_CANCER_SUBCLASS_INTERFERON_UP	CHIANG_LIVER_CANCER_SUBCLASS_INTERFERON_UP		25	-0.591744	-1.65811	0.0356394	0.0878177	0.997	3401	tags=52%, list=18%, signal=63%
SOTIRIOU_BREAST_CANCER_GRADE_1_VS_3_DN	SOTIRIOU_BREAST_CANCER_GRADE_1_VS_3_DN		48	-0.509245	-1.65753	0.0301811	0.0880148	0.997	3293	tags=46%, list=18%, signal=55%
DELACROIX_RAR_TARGETS_DN	DELACROIX_RAR_TARGETS_DN		24	-0.509363	-1.65718	0.0247423	0.0880531	0.997	937	tags=29%, list=5%, signal=31%
LU_TUMOR_ENDOTHELIAL_MARKERS_UP	LU_TUMOR_ENDOTHELIAL_MARKERS_UP		22	-0.605159	-1.65665	0.0576923	0.0882173	0.997	3301	tags=55%, list=18%, signal=66%
POOLA_INVASIVE_BREAST_CANCER_DN	POOLA_INVASIVE_BREAST_CANCER_DN		129	-0.412005	-1.65646	0.0137525	0.0881696	0.997	3469	tags=33%, list=19%, signal=40%
REACTOME_FGFR_LIGAND_BINDING_AND_ACTIVATION	REACTOME_FGFR_LIGAND_BINDING_AND_ACTIVATION		22	-0.588308	-1.65638	0.0265306	0.0880545	0.997	2084	tags=32%, list=11%, signal=36%
REACTOME_SMOOTH_MUSCLE_CONTRACTION	REACTOME_SMOOTH_MUSCLE_CONTRACTION		23	-0.728558	-1.6554	0.0610998	0.0884733	0.997	2679	tags=70%, list=14%, signal=81%
PID_AMB2_NEUTROPHILS_PATHWAY	PID_AMB2_NEUTROPHILS_PATHWAY		41	-0.493447	-1.65473	0.0407332	0.0886956	0.997	3205	tags=44%, list=17%, signal=53%
WEBER_METHYLATED_IN_COLON_CANCER	WEBER_METHYLATED_IN_COLON_CANCER		18	-0.55316	-1.65437	0.026	0.0887332	0.997	3521	tags=56%, list=19%, signal=68%
MCDOWELL_ACUTE_LUNG_INJURY_UP	MCDOWELL_ACUTE_LUNG_INJURY_UP		45	-0.533359	-1.65271	0.0311891	0.0895752	0.997	3723	tags=47%, list=20%, signal=58%
PID_SYNDECAN_4_PATHWAY	PID_SYNDECAN_4_PATHWAY		32	-0.514792	-1.65218	0.0231579	0.0897036	0.997	2556	tags=41%, list=14%, signal=47%
NABA_ECM_REGULATORS	NABA_ECM_REGULATORS		236	-0.436665	-1.65166	0.0102041	0.0898551	0.997	2774	tags=26%, list=15%, signal=30%
BIOCARTA_TOB1_PATHWAY	BIOCARTA_TOB1_PATHWAY		19	-0.612871	-1.65078	0.0490405	0.0901996	0.998	3158	tags=47%, list=17%, signal=57%
MULLIGHAN_MLL_SIGNATURE_1_DN	MULLIGHAN_MLL_SIGNATURE_1_DN		225	-0.344496	-1.65011	0.00614754	0.0904267	0.998	2565	tags=27%, list=14%, signal=31%
KEGG_GLYCOSPHINGOLIPID_BIOSYNTHESIS_GANGLIO_SERIES	KEGG_GLYCOSPHINGOLIPID_BIOSYNTHESIS_GANGLIO_SERIES		15	-0.58352	-1.64937	0.0351967	0.0907508	0.998	1772	tags=33%, list=9%, signal=37%
SUNG_METASTASIS_STROMA_UP	SUNG_METASTASIS_STROMA_UP		105	-0.441728	-1.64849	0.0252632	0.0910979	0.998	2593	tags=33%, list=14%, signal=38%
HAN_JNK_SINGALING_UP	HAN_JNK_SINGALING_UP		35	-0.49495	-1.6484	0.0179283	0.091	0.998	2869	tags=29%, list=15%, signal=34%
BIOCARTA_NKT_PATHWAY	BIOCARTA_NKT_PATHWAY		29	-0.639604	-1.64823	0.0533049	0.0908997	0.998	3256	tags=48%, list=17%, signal=58%
HESS_TARGETS_OF_HOXA9_AND_MEIS1_DN	HESS_TARGETS_OF_HOXA9_AND_MEIS1_DN		75	-0.51394	-1.64741	0.0621118	0.0912324	0.998	3699	tags=51%, list=20%, signal=63%
BIOCARTA_COMP_PATHWAY	BIOCARTA_COMP_PATHWAY		19	-0.641594	-1.64728	0.032538	0.0911506	0.998	2495	tags=42%, list=13%, signal=49%
LEIN_CEREBELLUM_MARKERS	LEIN_CEREBELLUM_MARKERS		80	-0.405718	-1.64495	0.00627615	0.0925167	0.998	1977	tags=24%, list=11%, signal=26%
LEE_DOUBLE_POLAR_THYMOCYTE	LEE_DOUBLE_POLAR_THYMOCYTE		25	-0.522324	-1.64431	0.02079	0.0927083	0.998	3128	tags=48%, list=17%, signal=58%
BURTON_ADIPOGENESIS_7	BURTON_ADIPOGENESIS_7		49	-0.463342	-1.64384	0.0344828	0.0928449	0.998	2454	tags=37%, list=13%, signal=42%
BAELDE_DIABETIC_NEPHROPATHY_DN	BAELDE_DIABETIC_NEPHROPATHY_DN		418	-0.383385	-1.64337	0.0136187	0.0929708	0.998	2719	tags=29%, list=15%, signal=33%
BERENJENO_ROCK_SIGNALING_NOT_VIA_RHOA_DN	BERENJENO_ROCK_SIGNALING_NOT_VIA_RHOA_DN		43	-0.540355	-1.64306	0.034	0.092996	0.998	3699	tags=56%, list=20%, signal=69%
KEGG_COMPLEMENT_AND_COAGULATION_CASCADES	KEGG_COMPLEMENT_AND_COAGULATION_CASCADES		68	-0.549033	-1.643	0.0167364	0.0928642	0.998	2497	tags=31%, list=13%, signal=36%
PID_S1P_S1P3_PATHWAY	PID_S1P_S1P3_PATHWAY		29	-0.531855	-1.64174	0.0378486	0.0935136	0.999	3282	tags=48%, list=18%, signal=58%
REN_ALVEOLAR_RHABDOMYOSARCOMA_DN	REN_ALVEOLAR_RHABDOMYOSARCOMA_DN		397	-0.439031	-1.63889	0.0618763	0.0951429	0.999	2504	tags=31%, list=13%, signal=36%
VALK_AML_CLUSTER_6	VALK_AML_CLUSTER_6		33	-0.464098	-1.63876	0.0268595	0.0950276	0.999	1945	tags=27%, list=10%, signal=30%
NIELSEN_GIST_AND_SYNOVIAL_SARCOMA_DN	NIELSEN_GIST_AND_SYNOVIAL_SARCOMA_DN		20	-0.667782	-1.63846	0.0509165	0.0950609	0.999	3707	tags=65%, list=20%, signal=81%
MIKKELSEN_MCV6_ICP_WITH_H3K27ME3	MIKKELSEN_MCV6_ICP_WITH_H3K27ME3		70	-0.466446	-1.63789	0.0104167	0.0952714	0.999	3201	tags=31%, list=17%, signal=38%
MCBRYAN_PUBERTAL_TGFB1_TARGETS_UP	MCBRYAN_PUBERTAL_TGFB1_TARGETS_UP		168	-0.410654	-1.63747	0.0302419	0.0953386	0.999	2470	tags=33%, list=13%, signal=37%
REACTOME_CELL_SURFACE_INTERACTIONS_AT_THE_VASCULAR_WALL	REACTOME_CELL_SURFACE_INTERACTIONS_AT_THE_VASCULAR_WALL		83	-0.420295	-1.6346	0.0221774	0.0970414	0.999	3632	tags=43%, list=19%, signal=54%
REACTOME_TRANSMISSION_ACROSS_CHEMICAL_SYNAPSES	REACTOME_TRANSMISSION_ACROSS_CHEMICAL_SYNAPSES		184	-0.389577	-1.63445	0.0104384	0.0969684	0.999	3481	tags=30%, list=19%, signal=37%
VANTVEER_BREAST_CANCER_BRCA1_DN	VANTVEER_BREAST_CANCER_BRCA1_DN		41	-0.478533	-1.63301	0.0244399	0.0977189	0.999	1927	tags=29%, list=10%, signal=33%
RIGGINS_TAMOXIFEN_RESISTANCE_UP	RIGGINS_TAMOXIFEN_RESISTANCE_UP		65	-0.43366	-1.63219	0.0148305	0.098117	0.999	3061	tags=32%, list=16%, signal=38%
TORCHIA_TARGETS_OF_EWSR1_FLI1_FUSION_DN	TORCHIA_TARGETS_OF_EWSR1_FLI1_FUSION_DN		293	-0.35683	-1.63196	0.0143737	0.0980959	0.999	3173	tags=31%, list=17%, signal=36%
REACTOME_POTASSIUM_CHANNELS	REACTOME_POTASSIUM_CHANNELS		96	-0.452523	-1.63191	0.0248963	0.0979447	0.999	5103	tags=47%, list=27%, signal=64%
KEGG_TGF_BETA_SIGNALING_PATHWAY	KEGG_TGF_BETA_SIGNALING_PATHWAY		85	-0.417226	-1.63184	0.0199601	0.0978168	0.999	2163	tags=27%, list=12%, signal=30%
ROVERSI_GLIOMA_LOH_REGIONS	ROVERSI_GLIOMA_LOH_REGIONS		42	-0.466417	-1.63176	0.0220884	0.0976874	0.999	2213	tags=31%, list=12%, signal=35%
REACTOME_HEPARAN_SULFATE_HEPARIN_HS_GAG_METABOLISM	REACTOME_HEPARAN_SULFATE_HEPARIN_HS_GAG_METABOLISM		51	-0.458476	-1.6312	0.00829876	0.0978589	0.999	2980	tags=27%, list=16%, signal=33%
NIELSEN_MALIGNAT_FIBROUS_HISTIOCYTOMA_DN	NIELSEN_MALIGNAT_FIBROUS_HISTIOCYTOMA_DN		16	-0.602331	-1.63012	0.0507099	0.0983923	0.999	3647	tags=56%, list=19%, signal=70%
REACTOME_DAG_AND_IP3_SIGNALING	REACTOME_DAG_AND_IP3_SIGNALING		30	-0.498146	-1.62948	0.032538	0.0986367	0.999	1629	tags=30%, list=9%, signal=33%
MIYAGAWA_TARGETS_OF_EWSR1_ETS_FUSIONS_UP	MIYAGAWA_TARGETS_OF_EWSR1_ETS_FUSIONS_UP		247	-0.355353	-1.62816	0.0125261	0.0993187	0.999	2060	tags=22%, list=11%, signal=24%
LEIN_OLIGODENDROCYTE_MARKERS	LEIN_OLIGODENDROCYTE_MARKERS		69	-0.404872	-1.62722	0.0118343	0.0997409	0.999	2308	tags=26%, list=12%, signal=30%
RAMASWAMY_METASTASIS_DN	RAMASWAMY_METASTASIS_DN		59	-0.420785	-1.6268	0.0143737	0.0998338	0.999	2079	tags=25%, list=11%, signal=29%
PEDERSEN_METASTASIS_BY_ERBB2_ISOFORM_6	PEDERSEN_METASTASIS_BY_ERBB2_ISOFORM_6		27	-0.495201	-1.62675	0.019802	0.0996886	0.999	2427	tags=33%, list=13%, signal=38%
BOYLAN_MULTIPLE_MYELOMA_C_D_DN	BOYLAN_MULTIPLE_MYELOMA_C_D_DN		235	-0.397752	-1.6262	0.0245399	0.0998787	0.999	4286	tags=39%, list=23%, signal=50%
WANG_TNF_TARGETS	WANG_TNF_TARGETS		22	-0.591174	-1.62612	0.0300601	0.0997562	0.999	4039	tags=55%, list=22%, signal=69%
TORCHIA_TARGETS_OF_EWSR1_FLI1_FUSION_UP	TORCHIA_TARGETS_OF_EWSR1_FLI1_FUSION_UP		251	-0.35521	-1.62596	0.0105485	0.0996907	0.999	2894	tags=27%, list=15%, signal=32%
REACTOME_PLC_BETA_MEDIATED_EVENTS	REACTOME_PLC_BETA_MEDIATED_EVENTS		40	-0.47135	-1.62455	0.0286976	0.100529	0.999	3706	tags=45%, list=20%, signal=56%
REACTOME_OTHER_SEMAPHORIN_INTERACTIONS	REACTOME_OTHER_SEMAPHORIN_INTERACTIONS		15	-0.603473	-1.62358	0.0162272	0.100999	0.999	5343	tags=73%, list=29%, signal=103%
LU_TUMOR_VASCULATURE_UP	LU_TUMOR_VASCULATURE_UP		29	-0.535114	-1.62286	0.0672897	0.101318	0.999	2772	tags=41%, list=15%, signal=49%
GAVIN_PDE3B_TARGETS	GAVIN_PDE3B_TARGETS		21	-0.585115	-1.62164	0.0416667	0.101944	0.999	2497	tags=33%, list=13%, signal=38%
HELLER_HDAC_TARGETS_SILENCED_BY_METHYLATION_UP	HELLER_HDAC_TARGETS_SILENCED_BY_METHYLATION_UP		435	-0.338999	-1.62131	0.00200401	0.102023	0.999	2535	tags=22%, list=14%, signal=24%
HOELZEL_NF1_TARGETS_UP	HOELZEL_NF1_TARGETS_UP		127	-0.402808	-1.62124	0.00814664	0.101885	0.999	4348	tags=39%, list=23%, signal=50%
MARKEY_RB1_CHRONIC_LOF_DN	MARKEY_RB1_CHRONIC_LOF_DN		111	-0.439577	-1.62094	0.0427699	0.101909	0.999	4665	tags=53%, list=25%, signal=70%
IIZUKA_LIVER_CANCER_PROGRESSION_L1_G1_UP	IIZUKA_LIVER_CANCER_PROGRESSION_L1_G1_UP		25	-0.515478	-1.62007	0.0325203	0.102326	0.999	2247	tags=28%, list=12%, signal=32%
VALK_AML_CLUSTER_13	VALK_AML_CLUSTER_13		29	-0.511484	-1.61886	0.0299145	0.102985	0.999	3486	tags=41%, list=19%, signal=51%
BROWNE_HCMV_INFECTION_2HR_UP	BROWNE_HCMV_INFECTION_2HR_UP		38	-0.508534	-1.61824	0.0148305	0.10324	0.999	2395	tags=34%, list=13%, signal=39%
GAUSSMANN_MLL_AF4_FUSION_TARGETS_D_UP	GAUSSMANN_MLL_AF4_FUSION_TARGETS_D_UP		35	-0.475462	-1.61733	0.0144928	0.103724	0.999	3438	tags=40%, list=18%, signal=49%
BRUECKNER_TARGETS_OF_MIRLET7A3_DN	BRUECKNER_TARGETS_OF_MIRLET7A3_DN		72	-0.442613	-1.61628	0.0531496	0.104295	1	2082	tags=28%, list=11%, signal=31%
KHETCHOUMIAN_TRIM24_TARGETS_UP	KHETCHOUMIAN_TRIM24_TARGETS_UP		46	-0.506573	-1.61552	0.0444444	0.104671	1	3099	tags=39%, list=17%, signal=47%
PARENT_MTOR_SIGNALING_DN	PARENT_MTOR_SIGNALING_DN		42	-0.429142	-1.61528	0.0178926	0.104649	1	3226	tags=43%, list=17%, signal=52%
REACTOME_GABA_B_RECEPTOR_ACTIVATION	REACTOME_GABA_B_RECEPTOR_ACTIVATION		38	-0.457903	-1.61479	0.018711	0.1048	1	2817	tags=32%, list=15%, signal=37%
TONKS_TARGETS_OF_RUNX1_RUNX1T1_FUSION_SUSTAINDED_IN_ERYTHROCYTE_UP	TONKS_TARGETS_OF_RUNX1_RUNX1T1_FUSION_SUSTAINDED_IN_ERYTHROCYTE_UP		44	-0.4896	-1.61382	0.0376238	0.105335	1	1997	tags=30%, list=11%, signal=33%
TURASHVILI_BREAST_DUCTAL_CARCINOMA_VS_DUCTAL_NORMAL_UP	TURASHVILI_BREAST_DUCTAL_CARCINOMA_VS_DUCTAL_NORMAL_UP		42	-0.51633	-1.61118	0.057732	0.106967	1	1658	tags=36%, list=9%, signal=39%
ZHANG_TLX_TARGETS_36HR_UP	ZHANG_TLX_TARGETS_36HR_UP		217	-0.395177	-1.61094	0.0220441	0.106958	1	3115	tags=31%, list=17%, signal=37%
RODRIGUES_NTN1_TARGETS_UP	RODRIGUES_NTN1_TARGETS_UP		16	-0.572203	-1.61076	0.0360934	0.106908	1	2610	tags=38%, list=14%, signal=44%
BOYAULT_LIVER_CANCER_SUBCLASS_G3_DN	BOYAULT_LIVER_CANCER_SUBCLASS_G3_DN		49	-0.523214	-1.61053	0.0222222	0.106879	1	1973	tags=33%, list=11%, signal=36%
NIELSEN_SCHWANNOMA_UP	NIELSEN_SCHWANNOMA_UP		16	-0.571937	-1.61014	0.0315126	0.106969	1	2872	tags=50%, list=15%, signal=59%
IVANOVA_HEMATOPOIESIS_STEM_CELL	IVANOVA_HEMATOPOIESIS_STEM_CELL		239	-0.352947	-1.61	0.00826446	0.106882	1	3344	tags=30%, list=18%, signal=36%
HUANG_DASATINIB_RESISTANCE_UP	HUANG_DASATINIB_RESISTANCE_UP		78	-0.475553	-1.60902	0.0582329	0.107347	1	2446	tags=37%, list=13%, signal=43%
SA_MMP_CYTOKINE_CONNECTION	SA_MMP_CYTOKINE_CONNECTION		15	-0.654638	-1.60887	0.0583333	0.107274	1	4776	tags=60%, list=26%, signal=81%
MEISSNER_NPC_HCP_WITH_H3K4ME2_AND_H3K27ME3	MEISSNER_NPC_HCP_WITH_H3K4ME2_AND_H3K27ME3		334	-0.390097	-1.60742	0.0143443	0.108063	1	3669	tags=31%, list=20%, signal=37%
ZHOU_INFLAMMATORY_RESPONSE_FIMA_UP	ZHOU_INFLAMMATORY_RESPONSE_FIMA_UP		461	-0.331909	-1.60726	0.002	0.107995	1	4316	tags=34%, list=23%, signal=43%
ASTON_MAJOR_DEPRESSIVE_DISORDER_UP	ASTON_MAJOR_DEPRESSIVE_DISORDER_UP		44	-0.467637	-1.60709	0.0166667	0.107924	1	2302	tags=32%, list=12%, signal=36%
WESTON_VEGFA_TARGETS_3HR	WESTON_VEGFA_TARGETS_3HR		69	-0.422509	-1.60676	0.0296443	0.107943	1	2501	tags=32%, list=13%, signal=37%
KEGG_CYTOKINE_CYTOKINE_RECEPTOR_INTERACTION	KEGG_CYTOKINE_CYTOKINE_RECEPTOR_INTERACTION		239	-0.432581	-1.60657	0.0438413	0.107913	1	4075	tags=37%, list=22%, signal=47%
AMIT_SERUM_RESPONSE_60_MCF10A	AMIT_SERUM_RESPONSE_60_MCF10A		56	-0.476679	-1.60561	0.0327869	0.108361	1	1997	tags=30%, list=11%, signal=34%
REACTOME_DEFENSINS	REACTOME_DEFENSINS		22	-0.591993	-1.60554	0.0286299	0.108217	1	5501	tags=59%, list=29%, signal=84%
GAUSSMANN_MLL_AF4_FUSION_TARGETS_C_DN	GAUSSMANN_MLL_AF4_FUSION_TARGETS_C_DN		18	-0.514244	-1.60501	0.0341365	0.108399	1	1392	tags=33%, list=7%, signal=36%
REACTOME_BETA_DEFENSINS	REACTOME_BETA_DEFENSINS		15	-0.648646	-1.60439	0.037037	0.108667	1	5995	tags=67%, list=32%, signal=98%
TAVOR_CEBPA_TARGETS_DN	TAVOR_CEBPA_TARGETS_DN		30	-0.490888	-1.60436	0.0316206	0.108492	1	2679	tags=30%, list=14%, signal=35%
VANDESLUIS_COMMD1_TARGETS_GROUP_4_DN	VANDESLUIS_COMMD1_TARGETS_GROUP_4_DN		15	-0.574796	-1.60358	0.0212314	0.108911	1	644	tags=20%, list=3%, signal=21%
STREICHER_LSM1_TARGETS_UP	STREICHER_LSM1_TARGETS_UP		43	-0.450671	-1.60357	0.0228216	0.108731	1	3323	tags=44%, list=18%, signal=54%
VERRECCHIA_DELAYED_RESPONSE_TO_TGFB1	VERRECCHIA_DELAYED_RESPONSE_TO_TGFB1		39	-0.508517	-1.60355	0.0246407	0.108553	1	3126	tags=49%, list=17%, signal=58%
GOTZMANN_EPITHELIAL_TO_MESENCHYMAL_TRANSITION_UP	GOTZMANN_EPITHELIAL_TO_MESENCHYMAL_TRANSITION_UP		68	-0.436329	-1.60307	0.0322581	0.108697	1	2595	tags=41%, list=14%, signal=48%
NAKAJIMA_EOSINOPHIL	NAKAJIMA_EOSINOPHIL		27	-0.523538	-1.60233	0.0367347	0.109035	1	2900	tags=37%, list=16%, signal=44%
KANG_AR_TARGETS_UP	KANG_AR_TARGETS_UP		17	-0.594167	-1.60158	0.0547667	0.10943	1	2337	tags=41%, list=12%, signal=47%
PEDERSEN_METASTASIS_BY_ERBB2_ISOFORM_4	PEDERSEN_METASTASIS_BY_ERBB2_ISOFORM_4		104	-0.399195	-1.60136	0.0233918	0.109425	1	2276	tags=26%, list=12%, signal=29%
SEKI_INFLAMMATORY_RESPONSE_LPS_DN	SEKI_INFLAMMATORY_RESPONSE_LPS_DN		20	-0.560685	-1.60132	0.0352697	0.109271	1	3001	tags=40%, list=16%, signal=48%
PLASARI_NFIC_TARGETS_BASAL_UP	PLASARI_NFIC_TARGETS_BASAL_UP		27	-0.519528	-1.60025	0.0195312	0.109846	1	3304	tags=41%, list=18%, signal=49%
MCLACHLAN_DENTAL_CARIES_UP	MCLACHLAN_DENTAL_CARIES_UP		230	-0.520449	-1.59998	0.0912951	0.109846	1	4286	tags=49%, list=23%, signal=62%
GAUSSMANN_MLL_AF4_FUSION_TARGETS_F_DN	GAUSSMANN_MLL_AF4_FUSION_TARGETS_F_DN		31	-0.476702	-1.59971	0.0257937	0.109868	1	2442	tags=35%, list=13%, signal=41%
BACOLOD_RESISTANCE_TO_ALKYLATING_AGENTS_UP	BACOLOD_RESISTANCE_TO_ALKYLATING_AGENTS_UP		24	-0.492353	-1.59913	0.0263158	0.1101	1	1718	tags=25%, list=9%, signal=27%
BOYLAN_MULTIPLE_MYELOMA_PCA3_DN	BOYLAN_MULTIPLE_MYELOMA_PCA3_DN		64	-0.393439	-1.59896	0.011976	0.11002	1	3135	tags=36%, list=17%, signal=43%
DORSEY_GAB2_TARGETS	DORSEY_GAB2_TARGETS		31	-0.5318	-1.59854	0.0430328	0.110123	1	3559	tags=48%, list=19%, signal=60%
GAVIN_FOXP3_TARGETS_CLUSTER_P2	GAVIN_FOXP3_TARGETS_CLUSTER_P2		75	-0.382603	-1.59839	0.0184426	0.110056	1	2634	tags=25%, list=14%, signal=29%
MINGUEZ_LIVER_CANCER_VASCULAR_INVASION_DN	MINGUEZ_LIVER_CANCER_VASCULAR_INVASION_DN		21	-0.552149	-1.59737	0.037037	0.110568	1	1817	tags=19%, list=10%, signal=21%
HUANG_FOXA2_TARGETS_UP	HUANG_FOXA2_TARGETS_UP		43	-0.45506	-1.59499	0.0387755	0.112011	1	1732	tags=26%, list=9%, signal=28%
GRAESSMANN_RESPONSE_TO_MC_AND_SERUM_DEPRIVATION_UP	GRAESSMANN_RESPONSE_TO_MC_AND_SERUM_DEPRIVATION_UP		200	-0.386133	-1.59497	0.018711	0.111841	1	3365	tags=34%, list=18%, signal=40%
REACTOME_HEMOSTASIS	REACTOME_HEMOSTASIS		435	-0.337269	-1.59436	0.0102881	0.112071	1	3306	tags=29%, list=18%, signal=35%
DEMAGALHAES_AGING_UP	DEMAGALHAES_AGING_UP		53	-0.48606	-1.59399	0.0650407	0.112146	1	3837	tags=47%, list=21%, signal=59%
MEISSNER_NPC_HCP_WITH_H3_UNMETHYLATED	MEISSNER_NPC_HCP_WITH_H3_UNMETHYLATED		491	-0.336725	-1.59364	0.00208768	0.112197	1	2901	tags=25%, list=16%, signal=29%
HUI_MAPK14_TARGETS_UP	HUI_MAPK14_TARGETS_UP		20	-0.51085	-1.59357	0.0293501	0.112072	1	2613	tags=30%, list=14%, signal=35%
LEIN_MIDBRAIN_MARKERS	LEIN_MIDBRAIN_MARKERS		78	-0.398198	-1.59133	0.00601202	0.113582	1	2715	tags=29%, list=15%, signal=34%
NIELSEN_LEIOMYOSARCOMA_CNN1_DN	NIELSEN_LEIOMYOSARCOMA_CNN1_DN		20	-0.543372	-1.59127	0.0453649	0.11344	1	1161	tags=25%, list=6%, signal=27%
LEE_LIVER_CANCER	LEE_LIVER_CANCER		45	-0.453655	-1.59075	0.0273109	0.113652	1	2204	tags=20%, list=12%, signal=23%
MATZUK_CENTRAL_FOR_FEMALE_FERTILITY	MATZUK_CENTRAL_FOR_FEMALE_FERTILITY		28	-0.487721	-1.58994	0.0250522	0.114028	1	3699	tags=39%, list=20%, signal=49%
SHIPP_DLBCL_VS_FOLLICULAR_LYMPHOMA_DN	SHIPP_DLBCL_VS_FOLLICULAR_LYMPHOMA_DN		42	-0.541913	-1.58981	0.0593047	0.113948	1	4012	tags=52%, list=21%, signal=67%
NIELSEN_LIPOSARCOMA_DN	NIELSEN_LIPOSARCOMA_DN		19	-0.520387	-1.58952	0.0322581	0.113957	1	1770	tags=42%, list=9%, signal=46%
TONKS_TARGETS_OF_RUNX1_RUNX1T1_FUSION_ERYTHROCYTE_DN	TONKS_TARGETS_OF_RUNX1_RUNX1T1_FUSION_ERYTHROCYTE_DN		15	-0.558539	-1.58922	0.0373444	0.114003	1	2900	tags=53%, list=16%, signal=63%
FOSTER_KDM1A_TARGETS_UP	FOSTER_KDM1A_TARGETS_UP		244	-0.346457	-1.58853	0.002079	0.114275	1	3550	tags=25%, list=19%, signal=30%
REACTOME_OPIOID_SIGNALLING	REACTOME_OPIOID_SIGNALLING		75	-0.411149	-1.58837	0.0150538	0.11421	1	3479	tags=37%, list=19%, signal=46%
REACTOME_DEVELOPMENTAL_BIOLOGY	REACTOME_DEVELOPMENTAL_BIOLOGY		378	-0.343383	-1.58824	0.008	0.11412	1	3371	tags=31%, list=18%, signal=37%
BIOCARTA_SHH_PATHWAY	BIOCARTA_SHH_PATHWAY		16	-0.581024	-1.58743	0.0372671	0.114514	1	3191	tags=56%, list=17%, signal=68%
SHETH_LIVER_CANCER_VS_TXNIP_LOSS_PAM4	SHETH_LIVER_CANCER_VS_TXNIP_LOSS_PAM4		242	-0.341068	-1.58608	0.00849257	0.115293	1	2810	tags=25%, list=15%, signal=29%
LI_CISPLATIN_RESISTANCE_UP	LI_CISPLATIN_RESISTANCE_UP		24	-0.502805	-1.58562	0.0331263	0.115463	1	3933	tags=50%, list=21%, signal=63%
NIKOLSKY_OVERCONNECTED_IN_BREAST_CANCER	NIKOLSKY_OVERCONNECTED_IN_BREAST_CANCER		21	-0.480074	-1.58469	0.0411523	0.115974	1	2332	tags=29%, list=12%, signal=33%
PEPPER_CHRONIC_LYMPHOCYTIC_LEUKEMIA_UP	PEPPER_CHRONIC_LYMPHOCYTIC_LEUKEMIA_UP		32	-0.470195	-1.58428	0.0253165	0.116115	1	4290	tags=44%, list=23%, signal=57%
BROWNE_HCMV_INFECTION_1HR_UP	BROWNE_HCMV_INFECTION_1HR_UP		57	-0.416357	-1.58398	0.0178218	0.11614	1	4415	tags=46%, list=24%, signal=60%
TONKS_TARGETS_OF_RUNX1_RUNX1T1_FUSION_SUSTAINED_IN_GRANULOCYTE_UP	TONKS_TARGETS_OF_RUNX1_RUNX1T1_FUSION_SUSTAINED_IN_GRANULOCYTE_UP		15	-0.533206	-1.58275	0.0223124	0.116877	1	1978	tags=33%, list=11%, signal=37%
SASSON_RESPONSE_TO_GONADOTROPHINS_DN	SASSON_RESPONSE_TO_GONADOTROPHINS_DN		86	-0.435322	-1.58266	0.0465587	0.116761	1	2679	tags=35%, list=14%, signal=41%
ZHAN_MULTIPLE_MYELOMA_CD2_UP	ZHAN_MULTIPLE_MYELOMA_CD2_UP		43	-0.521113	-1.58241	0.0472441	0.116788	1	2812	tags=35%, list=15%, signal=41%
REACTOME_INTRINSIC_PATHWAY	REACTOME_INTRINSIC_PATHWAY		15	-0.579804	-1.58191	0.0254237	0.116928	1	1583	tags=33%, list=8%, signal=36%
KOBAYASHI_EGFR_SIGNALING_24HR_UP	KOBAYASHI_EGFR_SIGNALING_24HR_UP		99	-0.410336	-1.5815	0.0301811	0.117036	1	1974	tags=23%, list=11%, signal=26%
NAKAYAMA_SOFT_TISSUE_TUMORS_PCA1_DN	NAKAYAMA_SOFT_TISSUE_TUMORS_PCA1_DN		72	-0.434959	-1.58023	0.0238569	0.11777	1	3541	tags=35%, list=19%, signal=43%
NAKAMURA_ADIPOGENESIS_LATE_UP	NAKAMURA_ADIPOGENESIS_LATE_UP		97	-0.381114	-1.57973	0.0328542	0.117936	1	2281	tags=30%, list=12%, signal=34%
NADLER_OBESITY_UP	NADLER_OBESITY_UP		60	-0.529788	-1.57961	0.0757895	0.117842	1	3456	tags=47%, list=18%, signal=57%
KEGG_REGULATION_OF_ACTIN_CYTOSKELETON	KEGG_REGULATION_OF_ACTIN_CYTOSKELETON		209	-0.359348	-1.57846	0.0138889	0.118488	1	2679	tags=27%, list=14%, signal=31%
MCCLUNG_COCAINE_REWARD_5D	MCCLUNG_COCAINE_REWARD_5D		76	-0.39157	-1.57733	0.0183299	0.119056	1	3139	tags=33%, list=17%, signal=39%
WEINMANN_ADAPTATION_TO_HYPOXIA_UP	WEINMANN_ADAPTATION_TO_HYPOXIA_UP		28	-0.500626	-1.57684	0.0427699	0.119213	1	2875	tags=43%, list=15%, signal=51%
BIOCARTA_INTRINSIC_PATHWAY	BIOCARTA_INTRINSIC_PATHWAY		22	-0.622352	-1.57656	0.0333333	0.119209	1	2956	tags=45%, list=16%, signal=54%
PID_S1P_META_PATHWAY	PID_S1P_META_PATHWAY		21	-0.546955	-1.57549	0.0443548	0.119782	1	3909	tags=48%, list=21%, signal=60%
VALK_AML_WITH_11Q23_REARRANGED	VALK_AML_WITH_11Q23_REARRANGED		19	-0.509176	-1.57545	0.0164271	0.119636	1	3593	tags=37%, list=19%, signal=46%
LI_INDUCED_T_TO_NATURAL_KILLER_DN	LI_INDUCED_T_TO_NATURAL_KILLER_DN		110	-0.383319	-1.57543	0.026749	0.119473	1	2981	tags=32%, list=16%, signal=38%
PEPPER_CHRONIC_LYMPHOCYTIC_LEUKEMIA_DN	PEPPER_CHRONIC_LYMPHOCYTIC_LEUKEMIA_DN		20	-0.506728	-1.57456	0.032	0.12	1	5693	tags=65%, list=30%, signal=93%
DAVICIONI_PAX_FOXO1_SIGNATURE_IN_ARMS_UP	DAVICIONI_PAX_FOXO1_SIGNATURE_IN_ARMS_UP		55	-0.410337	-1.57416	0.0222222	0.120121	1	3931	tags=36%, list=21%, signal=46%
BIOCARTA_AMI_PATHWAY	BIOCARTA_AMI_PATHWAY		20	-0.665888	-1.57294	0.0325866	0.120849	1	2956	tags=45%, list=16%, signal=53%
KIM_MYCN_AMPLIFICATION_TARGETS_UP	KIM_MYCN_AMPLIFICATION_TARGETS_UP		88	-0.370483	-1.57155	0.00638298	0.121741	1	3083	tags=34%, list=16%, signal=41%
SASSON_RESPONSE_TO_FORSKOLIN_DN	SASSON_RESPONSE_TO_FORSKOLIN_DN		87	-0.430776	-1.57072	0.0428571	0.122224	1	2679	tags=34%, list=14%, signal=40%
KANG_AR_TARGETS_DN	KANG_AR_TARGETS_DN		19	-0.575479	-1.56922	0.0633663	0.123178	1	3606	tags=47%, list=19%, signal=59%
KEGG_LONG_TERM_DEPRESSION	KEGG_LONG_TERM_DEPRESSION		70	-0.39989	-1.56918	0.0126316	0.123021	1	2629	tags=26%, list=14%, signal=30%
PATTERSON_DOCETAXEL_RESISTANCE	PATTERSON_DOCETAXEL_RESISTANCE		29	-0.452337	-1.5687	0.0329457	0.123179	1	2313	tags=28%, list=12%, signal=31%
LIAN_LIPA_TARGETS_3M	LIAN_LIPA_TARGETS_3M		56	-0.558265	-1.56837	0.108333	0.123235	1	4031	tags=54%, list=22%, signal=68%
PID_BMP_PATHWAY	PID_BMP_PATHWAY		42	-0.460512	-1.56824	0.0469667	0.123148	1	2336	tags=26%, list=12%, signal=30%
NOUSHMEHR_GBM_SILENCED_BY_METHYLATION	NOUSHMEHR_GBM_SILENCED_BY_METHYLATION		46	-0.423153	-1.56701	0.0290698	0.123877	1	2523	tags=28%, list=13%, signal=33%
HUANG_FOXA2_TARGETS_DN	HUANG_FOXA2_TARGETS_DN		36	-0.484729	-1.56631	0.0580913	0.124199	1	2757	tags=33%, list=15%, signal=39%
FIGUEROA_AML_METHYLATION_CLUSTER_4_UP	FIGUEROA_AML_METHYLATION_CLUSTER_4_UP		97	-0.362762	-1.56299	0.0060241	0.126562	1	2621	tags=27%, list=14%, signal=31%
BUCKANOVICH_T_LYMPHOCYTE_HOMING_ON_TUMOR_UP	BUCKANOVICH_T_LYMPHOCYTE_HOMING_ON_TUMOR_UP		20	-0.541324	-1.56242	0.0450644	0.126819	1	2495	tags=35%, list=13%, signal=40%
REACTOME_NUCLEAR_SIGNALING_BY_ERBB4	REACTOME_NUCLEAR_SIGNALING_BY_ERBB4		38	-0.454814	-1.56078	0.0232068	0.127842	1	3125	tags=29%, list=17%, signal=35%
SCHLESINGER_METHYLATED_DE_NOVO_IN_CANCER	SCHLESINGER_METHYLATED_DE_NOVO_IN_CANCER		85	-0.391149	-1.5605	0.0239521	0.127862	1	3926	tags=35%, list=21%, signal=44%
BIOCARTA_ALK_PATHWAY	BIOCARTA_ALK_PATHWAY		36	-0.460369	-1.5596	0.0433925	0.128358	1	2163	tags=33%, list=12%, signal=38%
BIOCARTA_HDAC_PATHWAY	BIOCARTA_HDAC_PATHWAY		27	-0.505444	-1.5593	0.0429448	0.128408	1	3929	tags=48%, list=21%, signal=61%
MCBRYAN_PUBERTAL_TGFB1_TARGETS_DN	MCBRYAN_PUBERTAL_TGFB1_TARGETS_DN		60	-0.403491	-1.55891	0.0219124	0.128534	1	1879	tags=25%, list=10%, signal=28%
DELASERNA_MYOD_TARGETS_UP	DELASERNA_MYOD_TARGETS_UP		85	-0.383376	-1.55874	0.0186722	0.128474	1	1671	tags=22%, list=9%, signal=24%
GENTILE_UV_LOW_DOSE_DN	GENTILE_UV_LOW_DOSE_DN		65	-0.441864	-1.5577	0.0378947	0.129115	1	1852	tags=28%, list=10%, signal=31%
GERHOLD_ADIPOGENESIS_DN	GERHOLD_ADIPOGENESIS_DN		63	-0.433029	-1.55758	0.0575397	0.129015	1	2480	tags=35%, list=13%, signal=40%
VERHAAK_AML_WITH_NPM1_MUTATED_UP	VERHAAK_AML_WITH_NPM1_MUTATED_UP		174	-0.425209	-1.55748	0.0532787	0.128904	1	3007	tags=33%, list=16%, signal=39%
REACTOME_STRIATED_MUSCLE_CONTRACTION	REACTOME_STRIATED_MUSCLE_CONTRACTION		27	-0.498871	-1.55745	0.0334646	0.128738	1	1628	tags=26%, list=9%, signal=28%
REACTOME_GLUCAGON_SIGNALING_IN_METABOLIC_REGULATION	REACTOME_GLUCAGON_SIGNALING_IN_METABOLIC_REGULATION		33	-0.491152	-1.55723	0.0481172	0.128718	1	3479	tags=42%, list=19%, signal=52%
GAVIN_FOXP3_TARGETS_CLUSTER_T4	GAVIN_FOXP3_TARGETS_CLUSTER_T4		86	-0.411377	-1.55702	0.0301811	0.128701	1	3025	tags=35%, list=16%, signal=41%
GUILLAUMOND_KLF10_TARGETS_UP	GUILLAUMOND_KLF10_TARGETS_UP		50	-0.42062	-1.5568	0.026971	0.128693	1	2616	tags=32%, list=14%, signal=37%
REACTOME_ADP_SIGNALLING_THROUGH_P2RY12	REACTOME_ADP_SIGNALLING_THROUGH_P2RY12		21	-0.544622	-1.55457	0.0593047	0.130211	1	2817	tags=43%, list=15%, signal=50%
REACTOME_DEGRADATION_OF_THE_EXTRACELLULAR_MATRIX	REACTOME_DEGRADATION_OF_THE_EXTRACELLULAR_MATRIX		29	-0.571052	-1.55338	0.0408163	0.130891	1	5280	tags=69%, list=28%, signal=96%
NIKOLSKY_BREAST_CANCER_19Q13.1_AMPLICON	NIKOLSKY_BREAST_CANCER_19Q13.1_AMPLICON		22	-0.739186	-1.55312	0.0673469	0.130876	1	3640	tags=73%, list=19%, signal=90%
BREDEMEYER_RAG_SIGNALING_VIA_ATM_NOT_VIA_NFKB_UP	BREDEMEYER_RAG_SIGNALING_VIA_ATM_NOT_VIA_NFKB_UP		46	-0.388162	-1.55234	0.0174081	0.13128	1	3179	tags=35%, list=17%, signal=42%
LIN_TUMOR_ESCAPE_FROM_IMMUNE_ATTACK	LIN_TUMOR_ESCAPE_FROM_IMMUNE_ATTACK		16	-0.52433	-1.55197	0.0495868	0.131405	1	3898	tags=44%, list=21%, signal=55%
SARTIPY_NORMAL_AT_INSULIN_RESISTANCE_DN	SARTIPY_NORMAL_AT_INSULIN_RESISTANCE_DN		18	-0.529066	-1.54989	0.0504032	0.132951	1	1601	tags=33%, list=9%, signal=36%
CROONQUIST_NRAS_VS_STROMAL_STIMULATION_UP	CROONQUIST_NRAS_VS_STROMAL_STIMULATION_UP		37	-0.471042	-1.54969	0.0512295	0.132897	1	4378	tags=51%, list=23%, signal=67%
AMUNDSON_POOR_SURVIVAL_AFTER_GAMMA_RADIATION_8G	AMUNDSON_POOR_SURVIVAL_AFTER_GAMMA_RADIATION_8G		92	-0.415725	-1.54967	0.0573123	0.13272	1	3625	tags=38%, list=19%, signal=47%
HAHTOLA_SEZARY_SYNDROM_DN	HAHTOLA_SEZARY_SYNDROM_DN		38	-0.513904	-1.54945	0.083499	0.1327	1	3631	tags=37%, list=19%, signal=46%
MIKKELSEN_IPS_WITH_HCP_H3K27ME3	MIKKELSEN_IPS_WITH_HCP_H3K27ME3		98	-0.410266	-1.54861	0.0337302	0.133182	1	4861	tags=37%, list=26%, signal=49%
WIKMAN_ASBESTOS_LUNG_CANCER_DN	WIKMAN_ASBESTOS_LUNG_CANCER_DN		26	-0.511967	-1.54858	0.0789474	0.133011	1	3452	tags=54%, list=18%, signal=66%
MANTOVANI_VIRAL_GPCR_SIGNALING_UP	MANTOVANI_VIRAL_GPCR_SIGNALING_UP		82	-0.362897	-1.54772	0.0105708	0.133467	1	2099	tags=23%, list=11%, signal=26%
TURASHVILI_BREAST_LOBULAR_CARCINOMA_VS_LOBULAR_NORMAL_UP	TURASHVILI_BREAST_LOBULAR_CARCINOMA_VS_LOBULAR_NORMAL_UP		92	-0.405189	-1.54763	0.0372549	0.133354	1	2690	tags=28%, list=14%, signal=33%
PID_INTEGRIN_CS_PATHWAY	PID_INTEGRIN_CS_PATHWAY		26	-0.555621	-1.54533	0.0640496	0.134885	1	3632	tags=62%, list=19%, signal=76%
OHM_METHYLATED_IN_ADULT_CANCERS	OHM_METHYLATED_IN_ADULT_CANCERS		27	-0.44216	-1.54463	0.0456349	0.135267	1	2062	tags=30%, list=11%, signal=33%
NIELSEN_LEIOMYOSARCOMA_DN	NIELSEN_LEIOMYOSARCOMA_DN		15	-0.547111	-1.54352	0.0595238	0.135968	1	1417	tags=33%, list=8%, signal=36%
MIKKELSEN_ES_ICP_WITH_H3K27ME3	MIKKELSEN_ES_ICP_WITH_H3K27ME3		38	-0.475703	-1.54292	0.0310559	0.136252	1	2957	tags=32%, list=16%, signal=37%
MARCHINI_TRABECTEDIN_RESISTANCE_DN	MARCHINI_TRABECTEDIN_RESISTANCE_DN		47	-0.454512	-1.5428	0.0658683	0.136145	1	1628	tags=34%, list=9%, signal=37%
PLASARI_TGFB1_TARGETS_10HR_UP	PLASARI_TGFB1_TARGETS_10HR_UP		196	-0.391897	-1.54229	0.0544355	0.136397	1	4246	tags=39%, list=23%, signal=50%
TAVOR_CEBPA_TARGETS_UP	TAVOR_CEBPA_TARGETS_UP		48	-0.454867	-1.54016	0.0649606	0.137869	1	4430	tags=50%, list=24%, signal=65%
MAHAJAN_RESPONSE_TO_IL1A_DN	MAHAJAN_RESPONSE_TO_IL1A_DN		72	-0.397166	-1.5385	0.0387755	0.139036	1	1848	tags=25%, list=10%, signal=28%
SHIN_B_CELL_LYMPHOMA_CLUSTER_3	SHIN_B_CELL_LYMPHOMA_CLUSTER_3		28	-0.509135	-1.53689	0.0819328	0.140166	1	3593	tags=43%, list=19%, signal=53%
TAKADA_GASTRIC_CANCER_COPY_NUMBER_DN	TAKADA_GASTRIC_CANCER_COPY_NUMBER_DN		27	-0.490351	-1.53638	0.0583501	0.140409	1	4564	tags=48%, list=24%, signal=64%
FERRANDO_LYL1_NEIGHBORS	FERRANDO_LYL1_NEIGHBORS		15	-0.566278	-1.53566	0.0714286	0.140827	1	3180	tags=40%, list=17%, signal=48%
MAHADEVAN_GIST_MORPHOLOGICAL_SWITCH	MAHADEVAN_GIST_MORPHOLOGICAL_SWITCH		15	-0.575295	-1.53513	0.0753564	0.141046	1	3484	tags=53%, list=19%, signal=65%
ODONNELL_TARGETS_OF_MYC_AND_TFRC_UP	ODONNELL_TARGETS_OF_MYC_AND_TFRC_UP		78	-0.444286	-1.5349	0.0701403	0.141031	1	3630	tags=41%, list=19%, signal=51%
FIGUEROA_AML_METHYLATION_CLUSTER_3_UP	FIGUEROA_AML_METHYLATION_CLUSTER_3_UP		147	-0.343365	-1.53484	0.0160643	0.14087	1	2724	tags=26%, list=15%, signal=30%
KEGG_MAPK_SIGNALING_PATHWAY	KEGG_MAPK_SIGNALING_PATHWAY		264	-0.334481	-1.53436	0.0140281	0.141026	1	2759	tags=21%, list=15%, signal=24%
NIELSEN_GIST_VS_SYNOVIAL_SARCOMA_UP	NIELSEN_GIST_VS_SYNOVIAL_SARCOMA_UP		18	-0.545263	-1.53314	0.057971	0.141756	1	2012	tags=39%, list=11%, signal=44%
MIKKELSEN_IPS_ICP_WITH_H3K27ME3	MIKKELSEN_IPS_ICP_WITH_H3K27ME3		50	-0.429214	-1.53222	0.0147368	0.142312	1	4127	tags=36%, list=22%, signal=46%
BIOCARTA_PAR1_PATHWAY	BIOCARTA_PAR1_PATHWAY		37	-0.470889	-1.53191	0.0446247	0.142389	1	3479	tags=41%, list=19%, signal=50%
TSENG_ADIPOGENIC_POTENTIAL_UP	TSENG_ADIPOGENIC_POTENTIAL_UP		29	-0.470302	-1.5311	0.0390625	0.142814	1	1154	tags=24%, list=6%, signal=26%
VERRECCHIA_RESPONSE_TO_TGFB1_C1	VERRECCHIA_RESPONSE_TO_TGFB1_C1		19	-0.524067	-1.53071	0.0684105	0.142965	1	2247	tags=47%, list=12%, signal=54%
PLASARI_TGFB1_SIGNALING_VIA_NFIC_1HR_DN	PLASARI_TGFB1_SIGNALING_VIA_NFIC_1HR_DN		101	-0.397438	-1.52845	0.0439331	0.144614	1	3709	tags=35%, list=20%, signal=43%
PID_THROMBIN_PAR1_PATHWAY	PID_THROMBIN_PAR1_PATHWAY		42	-0.446593	-1.52793	0.0509165	0.144849	1	3354	tags=45%, list=18%, signal=55%
REACTOME_SIGNAL_AMPLIFICATION	REACTOME_SIGNAL_AMPLIFICATION		31	-0.475701	-1.5268	0.0386179	0.145571	1	3282	tags=39%, list=18%, signal=47%
WOTTON_RUNX_TARGETS_UP	WOTTON_RUNX_TARGETS_UP		19	-0.525112	-1.52644	0.0487805	0.145662	1	2679	tags=42%, list=14%, signal=49%
CASORELLI_ACUTE_PROMYELOCYTIC_LEUKEMIA_UP	CASORELLI_ACUTE_PROMYELOCYTIC_LEUKEMIA_UP		157	-0.371807	-1.52487	0.0336634	0.14676	1	3298	tags=29%, list=18%, signal=35%
VERHAAK_GLIOBLASTOMA_MESENCHYMAL	VERHAAK_GLIOBLASTOMA_MESENCHYMAL		209	-0.457724	-1.52475	0.100823	0.146684	1	4290	tags=48%, list=23%, signal=61%
PID_ENDOTHELIN_PATHWAY	PID_ENDOTHELIN_PATHWAY		63	-0.403067	-1.52471	0.0605428	0.146507	1	2742	tags=32%, list=15%, signal=37%
GAVIN_FOXP3_TARGETS_CLUSTER_P4	GAVIN_FOXP3_TARGETS_CLUSTER_P4		93	-0.376949	-1.51856	0.0289256	0.151493	1	3913	tags=35%, list=21%, signal=45%
PID_LYMPH_ANGIOGENESIS_PATHWAY	PID_LYMPH_ANGIOGENESIS_PATHWAY		24	-0.526472	-1.51836	0.0931174	0.151467	1	2759	tags=46%, list=15%, signal=54%
REACTOME_REGULATION_OF_WATER_BALANCE_BY_RENAL_AQUAPORINS	REACTOME_REGULATION_OF_WATER_BALANCE_BY_RENAL_AQUAPORINS		43	-0.429364	-1.51742	0.0547667	0.152034	1	3479	tags=37%, list=19%, signal=46%
BIOCARTA_DC_PATHWAY	BIOCARTA_DC_PATHWAY		20	-0.570859	-1.51647	0.0705394	0.152618	1	4981	tags=45%, list=27%, signal=61%
CHANG_IMMORTALIZED_BY_HPV31_UP	CHANG_IMMORTALIZED_BY_HPV31_UP		76	-0.38243	-1.51485	0.0319149	0.15379	1	1845	tags=22%, list=10%, signal=25%
DING_LUNG_CANCER_MUTATED_SIGNIFICANTLY	DING_LUNG_CANCER_MUTATED_SIGNIFICANTLY		26	-0.465344	-1.51322	0.033195	0.155026	1	2719	tags=38%, list=15%, signal=45%
POMEROY_MEDULLOBLASTOMA_PROGNOSIS_UP	POMEROY_MEDULLOBLASTOMA_PROGNOSIS_UP		43	-0.424718	-1.51299	0.0425963	0.155039	1	2818	tags=26%, list=15%, signal=30%
STAEGE_EWING_FAMILY_TUMOR	STAEGE_EWING_FAMILY_TUMOR		30	-0.452756	-1.50938	0.0440882	0.158019	1	3547	tags=40%, list=19%, signal=49%
HASLINGER_B_CLL_WITH_MUTATED_VH_GENES	HASLINGER_B_CLL_WITH_MUTATED_VH_GENES		17	-0.52939	-1.50616	0.0407725	0.16062	1	739	tags=24%, list=4%, signal=24%
REACTOME_SHC_MEDIATED_CASCADE	REACTOME_SHC_MEDIATED_CASCADE		28	-0.476175	-1.50502	0.0459082	0.161382	1	1185	tags=21%, list=6%, signal=23%
ZHOU_INFLAMMATORY_RESPONSE_LIVE_UP	ZHOU_INFLAMMATORY_RESPONSE_LIVE_UP		422	-0.320877	-1.50418	0.0156556	0.161871	1	3486	tags=26%, list=19%, signal=32%
HOSHIDA_LIVER_CANCER_SUBCLASS_S1	HOSHIDA_LIVER_CANCER_SUBCLASS_S1		233	-0.405612	-1.50341	0.106509	0.162367	1	3111	tags=34%, list=17%, signal=40%
PID_TXA2PATHWAY	PID_TXA2PATHWAY		55	-0.436451	-1.50317	0.0770791	0.162366	1	3452	tags=44%, list=18%, signal=53%
NIELSEN_GIST_AND_SYNOVIAL_SARCOMA_UP	NIELSEN_GIST_AND_SYNOVIAL_SARCOMA_UP		19	-0.558097	-1.50252	0.0542798	0.162792	1	4986	tags=74%, list=27%, signal=100%
BIOCARTA_CCR5_PATHWAY	BIOCARTA_CCR5_PATHWAY		17	-0.523289	-1.50247	0.0635246	0.162614	1	3871	tags=41%, list=21%, signal=52%
NIELSEN_SCHWANNOMA_DN	NIELSEN_SCHWANNOMA_DN		15	-0.57477	-1.50066	0.075594	0.164038	1	3615	tags=53%, list=19%, signal=66%
DACOSTA_ERCC3_ALLELE_XPCS_VS_TTD_UP	DACOSTA_ERCC3_ALLELE_XPCS_VS_TTD_UP		27	-0.45991	-1.50027	0.0510638	0.164148	1	2303	tags=30%, list=12%, signal=34%
MCCLUNG_CREB1_TARGETS_UP	MCCLUNG_CREB1_TARGETS_UP		96	-0.362708	-1.49944	0.0288066	0.164646	1	3417	tags=33%, list=18%, signal=41%
ZHAN_MULTIPLE_MYELOMA_MF_UP	ZHAN_MULTIPLE_MYELOMA_MF_UP		44	-0.427892	-1.49875	0.0594262	0.165064	1	2872	tags=41%, list=15%, signal=48%
XU_GH1_AUTOCRINE_TARGETS_UP	XU_GH1_AUTOCRINE_TARGETS_UP		226	-0.30729	-1.49733	0.0102041	0.166229	1	2180	tags=20%, list=12%, signal=22%
POS_HISTAMINE_RESPONSE_NETWORK	POS_HISTAMINE_RESPONSE_NETWORK		32	-0.450995	-1.49488	0.0691057	0.168312	1	1960	tags=31%, list=10%, signal=35%
ODONNELL_TFRC_TARGETS_UP	ODONNELL_TFRC_TARGETS_UP		369	-0.312214	-1.49452	0.00608519	0.168422	1	3702	tags=30%, list=20%, signal=36%
KEGG_LEUKOCYTE_TRANSENDOTHELIAL_MIGRATION	KEGG_LEUKOCYTE_TRANSENDOTHELIAL_MIGRATION		114	-0.380425	-1.49411	0.0655738	0.168575	1	3731	tags=36%, list=20%, signal=45%
FULCHER_INFLAMMATORY_RESPONSE_LECTIN_VS_LPS_DN	FULCHER_INFLAMMATORY_RESPONSE_LECTIN_VS_LPS_DN		425	-0.368821	-1.49345	0.0934959	0.16896	1	3320	tags=32%, list=18%, signal=39%
REACTOME_HS_GAG_DEGRADATION	REACTOME_HS_GAG_DEGRADATION		20	-0.504866	-1.49273	0.0532787	0.169446	1	2980	tags=30%, list=16%, signal=36%
ICHIBA_GRAFT_VERSUS_HOST_DISEASE_35D_DN	ICHIBA_GRAFT_VERSUS_HOST_DISEASE_35D_DN		49	-0.397246	-1.49203	0.0390947	0.169918	1	1482	tags=20%, list=8%, signal=22%
BIOCARTA_NO1_PATHWAY	BIOCARTA_NO1_PATHWAY		30	-0.442369	-1.49151	0.0638298	0.17016	1	3706	tags=50%, list=20%, signal=62%
DARWICHE_PAPILLOMA_RISK_HIGH_VS_LOW_DN	DARWICHE_PAPILLOMA_RISK_HIGH_VS_LOW_DN		29	-0.421414	-1.49121	0.0583501	0.170195	1	1629	tags=28%, list=9%, signal=30%
ALONSO_METASTASIS_EMT_UP	ALONSO_METASTASIS_EMT_UP		35	-0.425629	-1.48994	0.0802469	0.171099	1	2656	tags=34%, list=14%, signal=40%
WIERENGA_STAT5A_TARGETS_GROUP1	WIERENGA_STAT5A_TARGETS_GROUP1		123	-0.361594	-1.48696	0.0606654	0.173594	1	3812	tags=33%, list=20%, signal=42%
GYORFFY_DOXORUBICIN_RESISTANCE	GYORFFY_DOXORUBICIN_RESISTANCE		47	-0.391188	-1.48624	0.0298211	0.174043	1	959	tags=19%, list=5%, signal=20%
AKL_HTLV1_INFECTION_DN	AKL_HTLV1_INFECTION_DN		64	-0.402305	-1.48587	0.062753	0.174151	1	3497	tags=39%, list=19%, signal=48%
YU_MYC_TARGETS_DN	YU_MYC_TARGETS_DN		50	-0.507637	-1.48579	0.109244	0.173997	1	4227	tags=46%, list=23%, signal=59%
KARLSSON_TGFB1_TARGETS_DN	KARLSSON_TGFB1_TARGETS_DN		200	-0.330138	-1.48458	0.0508806	0.174951	1	1783	tags=19%, list=10%, signal=21%
MCCLUNG_DELTA_FOSB_TARGETS_8WK	MCCLUNG_DELTA_FOSB_TARGETS_8WK		47	-0.428687	-1.48437	0.0711297	0.174908	1	2980	tags=38%, list=16%, signal=45%
CHIARETTI_T_ALL_REFRACTORY_TO_THERAPY	CHIARETTI_T_ALL_REFRACTORY_TO_THERAPY		27	-0.452241	-1.48366	0.0468432	0.175337	1	4117	tags=48%, list=22%, signal=62%
LEE_NAIVE_T_LYMPHOCYTE	LEE_NAIVE_T_LYMPHOCYTE		17	-0.515601	-1.48325	0.1	0.175466	1	2419	tags=41%, list=13%, signal=47%
YAGI_AML_FAB_MARKERS	YAGI_AML_FAB_MARKERS		185	-0.32183	-1.48178	0.0342742	0.176643	1	2590	tags=28%, list=14%, signal=32%
VALK_AML_CLUSTER_3	VALK_AML_CLUSTER_3		28	-0.413794	-1.48122	0.0405117	0.176934	1	1975	tags=29%, list=11%, signal=32%
BOHN_PRIMARY_IMMUNODEFICIENCY_SYNDROM_DN	BOHN_PRIMARY_IMMUNODEFICIENCY_SYNDROM_DN		38	-0.453405	-1.47959	0.0761523	0.178235	1	3060	tags=37%, list=16%, signal=44%
LEE_METASTASIS_AND_ALTERNATIVE_SPLICING_UP	LEE_METASTASIS_AND_ALTERNATIVE_SPLICING_UP		71	-0.391487	-1.47936	0.0576541	0.178192	1	3212	tags=35%, list=17%, signal=42%
STEGER_ADIPOGENESIS_UP	STEGER_ADIPOGENESIS_UP		21	-0.556982	-1.47875	0.0920502	0.178582	1	4108	tags=52%, list=22%, signal=67%
KIM_GERMINAL_CENTER_T_HELPER_DN	KIM_GERMINAL_CENTER_T_HELPER_DN		21	-0.512451	-1.47783	0.0677618	0.179185	1	1813	tags=33%, list=10%, signal=37%
CHARAFE_BREAST_CANCER_LUMINAL_VS_BASAL_DN	CHARAFE_BREAST_CANCER_LUMINAL_VS_BASAL_DN		425	-0.381932	-1.4777	0.0896686	0.179086	1	2694	tags=27%, list=14%, signal=30%
AMIT_SERUM_RESPONSE_40_MCF10A	AMIT_SERUM_RESPONSE_40_MCF10A		31	-0.512208	-1.47722	0.115234	0.179272	1	3871	tags=48%, list=21%, signal=61%
REACTOME_REGULATION_OF_INSULIN_SECRETION_BY_GLUCAGON_LIKE_PEPTIDE1	REACTOME_REGULATION_OF_INSULIN_SECRETION_BY_GLUCAGON_LIKE_PEPTIDE1		42	-0.446153	-1.47708	0.0596708	0.17917	1	3801	tags=43%, list=20%, signal=54%
LABBE_TGFB1_TARGETS_UP	LABBE_TGFB1_TARGETS_UP		100	-0.364518	-1.47691	0.0460922	0.179076	1	3804	tags=32%, list=20%, signal=40%
ONO_AML1_TARGETS_DN	ONO_AML1_TARGETS_DN		38	-0.504086	-1.47622	0.12369	0.179487	1	3398	tags=47%, list=18%, signal=58%
PID_UPA_UPAR_PATHWAY	PID_UPA_UPAR_PATHWAY		42	-0.488665	-1.47599	0.0758483	0.179438	1	3076	tags=40%, list=16%, signal=48%
ALCALAY_AML_BY_NPM1_LOCALIZATION_UP	ALCALAY_AML_BY_NPM1_LOCALIZATION_UP		129	-0.337799	-1.47347	0.0401606	0.181556	1	2741	tags=26%, list=15%, signal=31%
BIOCARTA_INFLAM_PATHWAY	BIOCARTA_INFLAM_PATHWAY		26	-0.528043	-1.47323	0.0836653	0.181543	1	3115	tags=31%, list=17%, signal=37%
ONDER_CDH1_TARGETS_1_UP	ONDER_CDH1_TARGETS_1_UP		131	-0.362177	-1.4717	0.054878	0.182802	1	3457	tags=32%, list=18%, signal=39%
JOSEPH_RESPONSE_TO_SODIUM_BUTYRATE_DN	JOSEPH_RESPONSE_TO_SODIUM_BUTYRATE_DN		63	-0.379192	-1.47061	0.0560166	0.183569	1	3932	tags=38%, list=21%, signal=48%
REACTOME_AQUAPORIN_MEDIATED_TRANSPORT	REACTOME_AQUAPORIN_MEDIATED_TRANSPORT		50	-0.406053	-1.46957	0.0615711	0.184295	1	3801	tags=36%, list=20%, signal=45%
ZHAN_LATE_DIFFERENTIATION_GENES_UP	ZHAN_LATE_DIFFERENTIATION_GENES_UP		33	-0.449212	-1.4693	0.0762887	0.184339	1	3221	tags=42%, list=17%, signal=51%
JAZAERI_BREAST_CANCER_BRCA1_VS_BRCA2_DN	JAZAERI_BREAST_CANCER_BRCA1_VS_BRCA2_DN		40	-0.411071	-1.46924	0.0674603	0.184151	1	4470	tags=48%, list=24%, signal=62%
BROWN_MYELOID_CELL_DEVELOPMENT_UP	BROWN_MYELOID_CELL_DEVELOPMENT_UP		153	-0.408239	-1.46888	0.106339	0.184228	1	4552	tags=43%, list=24%, signal=57%
GUTIERREZ_CHRONIC_LYMPHOCYTIC_LEUKEMIA_DN	GUTIERREZ_CHRONIC_LYMPHOCYTIC_LEUKEMIA_DN		52	-0.389414	-1.4665	0.0437376	0.186306	1	3602	tags=40%, list=19%, signal=50%
VALK_AML_WITH_EVI1	VALK_AML_WITH_EVI1		21	-0.518988	-1.46625	0.0552017	0.186331	1	2137	tags=48%, list=11%, signal=54%
REACTOME_COMPLEMENT_CASCADE	REACTOME_COMPLEMENT_CASCADE		29	-0.487523	-1.46587	0.0842105	0.186481	1	2495	tags=31%, list=13%, signal=36%
JOHANSSON_BRAIN_CANCER_EARLY_VS_LATE_DN	JOHANSSON_BRAIN_CANCER_EARLY_VS_LATE_DN		44	-0.429066	-1.46494	0.084507	0.187179	1	2470	tags=30%, list=13%, signal=34%
RUTELLA_RESPONSE_TO_HGF_DN	RUTELLA_RESPONSE_TO_HGF_DN		228	-0.351347	-1.46369	0.0622407	0.188167	1	3710	tags=36%, list=20%, signal=45%
GUO_HEX_TARGETS_DN	GUO_HEX_TARGETS_DN		61	-0.389661	-1.46332	0.0692464	0.188322	1	2333	tags=31%, list=12%, signal=35%
BONOME_OVARIAN_CANCER_SURVIVAL_SUBOPTIMAL_DEBULKING	BONOME_OVARIAN_CANCER_SURVIVAL_SUBOPTIMAL_DEBULKING		484	-0.3027	-1.46315	0.0383838	0.188242	1	2477	tags=24%, list=13%, signal=27%
REACTOME_PROSTACYCLIN_SIGNALLING_THROUGH_PROSTACYCLIN_RECEPTOR	REACTOME_PROSTACYCLIN_SIGNALLING_THROUGH_PROSTACYCLIN_RECEPTOR		19	-0.533386	-1.46267	0.0814196	0.188474	1	2817	tags=37%, list=15%, signal=43%
BIOCARTA_NFAT_PATHWAY	BIOCARTA_NFAT_PATHWAY		53	-0.402491	-1.4626	0.0689655	0.188303	1	3929	tags=42%, list=21%, signal=52%
ODONNELL_METASTASIS_UP	ODONNELL_METASTASIS_UP		71	-0.3837	-1.46176	0.0441177	0.188891	1	3957	tags=38%, list=21%, signal=48%
PID_CONE_PATHWAY	PID_CONE_PATHWAY		22	-0.523978	-1.46051	0.0953347	0.189897	1	5360	tags=45%, list=29%, signal=64%
BILBAN_B_CLL_LPL_UP	BILBAN_B_CLL_LPL_UP		59	-0.374289	-1.46017	0.0641822	0.18994	1	3121	tags=36%, list=17%, signal=43%
MAHAJAN_RESPONSE_TO_IL1A_UP	MAHAJAN_RESPONSE_TO_IL1A_UP		80	-0.3862	-1.45989	0.0705645	0.189962	1	2801	tags=30%, list=15%, signal=35%
BILANGES_SERUM_SENSITIVE_VIA_TSC1	BILANGES_SERUM_SENSITIVE_VIA_TSC1		23	-0.453884	-1.45918	0.0767717	0.190436	1	1762	tags=26%, list=9%, signal=29%
CHEMELLO_SOLEUS_VS_EDL_MYOFIBERS_DN	CHEMELLO_SOLEUS_VS_EDL_MYOFIBERS_DN		19	-0.523973	-1.45901	0.0777311	0.190359	1	2628	tags=32%, list=14%, signal=37%
NAKAMURA_CANCER_MICROENVIRONMENT_UP	NAKAMURA_CANCER_MICROENVIRONMENT_UP		21	-0.546288	-1.45894	0.0509165	0.190185	1	1928	tags=38%, list=10%, signal=42%
DUTERTRE_ESTRADIOL_RESPONSE_24HR_DN	DUTERTRE_ESTRADIOL_RESPONSE_24HR_DN		486	-0.353632	-1.45867	0.0778443	0.190203	1	3903	tags=33%, list=21%, signal=41%
EHLERS_ANEUPLOIDY_UP	EHLERS_ANEUPLOIDY_UP		39	-0.458149	-1.45862	0.094	0.190019	1	3032	tags=41%, list=16%, signal=49%
REACTOME_ACTIVATION_OF_KAINATE_RECEPTORS_UPON_GLUTAMATE_BINDING	REACTOME_ACTIVATION_OF_KAINATE_RECEPTORS_UPON_GLUTAMATE_BINDING		31	-0.45444	-1.45814	0.0755102	0.190222	1	2817	tags=35%, list=15%, signal=42%
XU_HGF_TARGETS_REPRESSED_BY_AKT1_DN	XU_HGF_TARGETS_REPRESSED_BY_AKT1_DN		87	-0.34716	-1.45722	0.0289855	0.190877	1	3228	tags=28%, list=17%, signal=33%
REACTOME_SIGNALING_BY_RHO_GTPASES	REACTOME_SIGNALING_BY_RHO_GTPASES		111	-0.37449	-1.45667	0.0781893	0.191174	1	3301	tags=32%, list=18%, signal=39%
MIKKELSEN_MEF_HCP_WITH_H3_UNMETHYLATED	MIKKELSEN_MEF_HCP_WITH_H3_UNMETHYLATED		212	-0.365132	-1.45594	0.0664062	0.191664	1	5122	tags=40%, list=27%, signal=54%
BIDUS_METASTASIS_DN	BIDUS_METASTASIS_DN		146	-0.35204	-1.45477	0.063655	0.192552	1	3193	tags=30%, list=17%, signal=36%
ONO_FOXP3_TARGETS_UP	ONO_FOXP3_TARGETS_UP		21	-0.530582	-1.45412	0.109504	0.192992	1	4986	tags=62%, list=27%, signal=84%
FIGUEROA_AML_METHYLATION_CLUSTER_7_UP	FIGUEROA_AML_METHYLATION_CLUSTER_7_UP		101	-0.330821	-1.45354	0.0174757	0.193289	1	2621	tags=25%, list=14%, signal=29%
FIGUEROA_AML_METHYLATION_CLUSTER_6_UP	FIGUEROA_AML_METHYLATION_CLUSTER_6_UP		125	-0.312094	-1.45214	0.0209125	0.194492	1	2563	tags=24%, list=14%, signal=28%
BAKKER_FOXO3_TARGETS_UP	BAKKER_FOXO3_TARGETS_UP		59	-0.385457	-1.45203	0.0666667	0.194348	1	3916	tags=37%, list=21%, signal=47%
BROWNE_HCMV_INFECTION_30MIN_UP	BROWNE_HCMV_INFECTION_30MIN_UP		49	-0.395138	-1.45155	0.0748441	0.194594	1	3260	tags=29%, list=17%, signal=35%
TURASHVILI_BREAST_LOBULAR_CARCINOMA_VS_DUCTAL_NORMAL_DN	TURASHVILI_BREAST_LOBULAR_CARCINOMA_VS_DUCTAL_NORMAL_DN		85	-0.383272	-1.45065	0.0516899	0.195262	1	2690	tags=25%, list=14%, signal=29%
HUTTMANN_B_CLL_POOR_SURVIVAL_DN	HUTTMANN_B_CLL_POOR_SURVIVAL_DN		56	-0.407652	-1.45044	0.0712871	0.195209	1	3188	tags=34%, list=17%, signal=41%
BIOCARTA_PGC1A_PATHWAY	BIOCARTA_PGC1A_PATHWAY		22	-0.499379	-1.45041	0.105042	0.194995	1	3930	tags=55%, list=21%, signal=69%
GARCIA_TARGETS_OF_FLI1_AND_DAX1_UP	GARCIA_TARGETS_OF_FLI1_AND_DAX1_UP		54	-0.379692	-1.44976	0.0763052	0.195391	1	3444	tags=31%, list=18%, signal=38%
REACTOME_PKA_MEDIATED_PHOSPHORYLATION_OF_CREB	REACTOME_PKA_MEDIATED_PHOSPHORYLATION_OF_CREB		17	-0.522838	-1.44896	0.0857143	0.195964	1	3479	tags=53%, list=19%, signal=65%
SATO_SILENCED_BY_DEACETYLATION_IN_PANCREATIC_CANCER	SATO_SILENCED_BY_DEACETYLATION_IN_PANCREATIC_CANCER		43	-0.412115	-1.44883	0.0546559	0.195866	1	4170	tags=40%, list=22%, signal=51%
XU_GH1_EXOGENOUS_TARGETS_UP	XU_GH1_EXOGENOUS_TARGETS_UP		73	-0.351313	-1.44708	0.0284553	0.1974	1	2548	tags=25%, list=14%, signal=28%
NOUZOVA_METHYLATED_IN_APL	NOUZOVA_METHYLATED_IN_APL		58	-0.371905	-1.44634	0.0414079	0.197969	1	2909	tags=29%, list=16%, signal=35%
LIANG_SILENCED_BY_METHYLATION_UP	LIANG_SILENCED_BY_METHYLATION_UP		30	-0.4501	-1.44383	0.0974155	0.200265	1	2495	tags=27%, list=13%, signal=31%
HOSHIDA_LIVER_CANCER_LATE_RECURRENCE_UP	HOSHIDA_LIVER_CANCER_LATE_RECURRENCE_UP		57	-0.379077	-1.44376	0.0688976	0.200104	1	2446	tags=28%, list=13%, signal=32%
BEGUM_TARGETS_OF_PAX3_FOXO1_FUSION_DN	BEGUM_TARGETS_OF_PAX3_FOXO1_FUSION_DN		45	-0.423365	-1.44315	0.0625	0.200463	1	2140	tags=36%, list=11%, signal=40%
ZHOU_INFLAMMATORY_RESPONSE_LPS_UP	ZHOU_INFLAMMATORY_RESPONSE_LPS_UP		359	-0.303435	-1.44294	0.0161616	0.200423	1	3796	tags=28%, list=20%, signal=34%
LEE_LIVER_CANCER_DENA_UP	LEE_LIVER_CANCER_DENA_UP		60	-0.380657	-1.4429	0.0732673	0.200216	1	2337	tags=27%, list=12%, signal=30%
ACEVEDO_LIVER_CANCER_WITH_H3K27ME3_DN	ACEVEDO_LIVER_CANCER_WITH_H3K27ME3_DN		179	-0.328892	-1.44267	0.0413223	0.200213	1	3894	tags=32%, list=21%, signal=40%
STOSSI_RESPONSE_TO_ESTRADIOL	STOSSI_RESPONSE_TO_ESTRADIOL		47	-0.39747	-1.44262	0.0575397	0.200011	1	4345	tags=40%, list=23%, signal=53%
WU_CELL_MIGRATION	WU_CELL_MIGRATION		180	-0.371103	-1.43948	0.0944882	0.203016	1	2470	tags=27%, list=13%, signal=31%
MEISSNER_NPC_HCP_WITH_H3K4ME3_AND_H3K27ME3	MEISSNER_NPC_HCP_WITH_H3K4ME3_AND_H3K27ME3		136	-0.331843	-1.43935	0.0327869	0.202916	1	3342	tags=27%, list=18%, signal=33%
CROMER_TUMORIGENESIS_UP	CROMER_TUMORIGENESIS_UP		61	-0.47991	-1.43926	0.136986	0.202756	1	4121	tags=43%, list=22%, signal=54%
HOWLIN_CITED1_TARGETS_1_UP	HOWLIN_CITED1_TARGETS_1_UP		31	-0.41267	-1.43863	0.0647182	0.203118	1	3220	tags=29%, list=17%, signal=35%
LEE_AGING_MUSCLE_DN	LEE_AGING_MUSCLE_DN		45	-0.384348	-1.43854	0.0554415	0.202959	1	1658	tags=24%, list=9%, signal=27%
SAKAI_CHRONIC_HEPATITIS_VS_LIVER_CANCER_DN	SAKAI_CHRONIC_HEPATITIS_VS_LIVER_CANCER_DN		34	-0.422396	-1.438	0.0564516	0.203299	1	3317	tags=29%, list=18%, signal=36%
VALK_AML_CLUSTER_16	VALK_AML_CLUSTER_16		23	-0.435096	-1.43732	0.0630081	0.203701	1	3593	tags=48%, list=19%, signal=59%
RODRIGUES_DCC_TARGETS_DN	RODRIGUES_DCC_TARGETS_DN		118	-0.357507	-1.43672	0.0818363	0.204013	1	3287	tags=30%, list=18%, signal=36%
URS_ADIPOCYTE_DIFFERENTIATION_UP	URS_ADIPOCYTE_DIFFERENTIATION_UP		74	-0.351668	-1.436	0.0516529	0.204455	1	2774	tags=27%, list=15%, signal=32%
CHIARADONNA_NEOPLASTIC_TRANSFORMATION_CDC25_DN	CHIARADONNA_NEOPLASTIC_TRANSFORMATION_CDC25_DN		146	-0.363324	-1.43597	0.0949495	0.204241	1	1428	tags=20%, list=8%, signal=21%
MIKKELSEN_ES_LCP_WITH_H3K4ME3	MIKKELSEN_ES_LCP_WITH_H3K4ME3		125	-0.347621	-1.43525	0.0598291	0.204736	1	3559	tags=28%, list=19%, signal=34%
GOLDRATH_IMMUNE_MEMORY	GOLDRATH_IMMUNE_MEMORY		63	-0.350268	-1.43484	0.0546559	0.204886	1	4280	tags=37%, list=23%, signal=47%
BRUINS_UVC_RESPONSE_VIA_TP53_GROUP_D	BRUINS_UVC_RESPONSE_VIA_TP53_GROUP_D		253	-0.283459	-1.43477	0.0140281	0.204743	1	3105	tags=25%, list=17%, signal=29%
REACTOME_L1CAM_INTERACTIONS	REACTOME_L1CAM_INTERACTIONS		83	-0.364695	-1.43435	0.0554455	0.204901	1	2954	tags=34%, list=16%, signal=40%
SPIELMAN_LYMPHOBLAST_EUROPEAN_VS_ASIAN_2FC_DN	SPIELMAN_LYMPHOBLAST_EUROPEAN_VS_ASIAN_2FC_DN		20	-0.518105	-1.43312	0.112224	0.205954	1	4636	tags=55%, list=25%, signal=73%
REACTOME_G_BETA_GAMMA_SIGNALLING_THROUGH_PI3KGAMMA	REACTOME_G_BETA_GAMMA_SIGNALLING_THROUGH_PI3KGAMMA		25	-0.493496	-1.43292	0.108974	0.205888	1	2817	tags=36%, list=15%, signal=42%
KOBAYASHI_RESPONSE_TO_ROMIDEPSIN	KOBAYASHI_RESPONSE_TO_ROMIDEPSIN		18	-0.462927	-1.4315	0.078125	0.20712	1	3280	tags=33%, list=18%, signal=40%
RODRIGUES_THYROID_CARCINOMA_DN	RODRIGUES_THYROID_CARCINOMA_DN		73	-0.402292	-1.43068	0.10297	0.207748	1	1539	tags=19%, list=8%, signal=21%
ALTEMEIER_RESPONSE_TO_LPS_WITH_MECHANICAL_VENTILATION	ALTEMEIER_RESPONSE_TO_LPS_WITH_MECHANICAL_VENTILATION		125	-0.452288	-1.43046	0.166994	0.207766	1	4066	tags=42%, list=22%, signal=54%
HUANG_GATA2_TARGETS_UP	HUANG_GATA2_TARGETS_UP		145	-0.391459	-1.42984	0.109959	0.208148	1	3496	tags=35%, list=19%, signal=43%
KYNG_DNA_DAMAGE_BY_4NQO	KYNG_DNA_DAMAGE_BY_4NQO		37	-0.381045	-1.42885	0.0730223	0.208947	1	1933	tags=22%, list=10%, signal=24%
MCMURRAY_TP53_HRAS_COOPERATION_RESPONSE_UP	MCMURRAY_TP53_HRAS_COOPERATION_RESPONSE_UP		25	-0.427593	-1.42882	0.05	0.208746	1	2313	tags=24%, list=12%, signal=27%
KEGG_AXON_GUIDANCE	KEGG_AXON_GUIDANCE		127	-0.342024	-1.42828	0.0595238	0.209057	1	3244	tags=31%, list=17%, signal=38%
KEGG_PATHWAYS_IN_CANCER	KEGG_PATHWAYS_IN_CANCER		321	-0.306494	-1.42682	0.0281125	0.210289	1	2385	tags=22%, list=13%, signal=25%
BHAT_ESR1_TARGETS_VIA_AKT1_DN	BHAT_ESR1_TARGETS_VIA_AKT1_DN		78	-0.39602	-1.42642	0.0979592	0.210479	1	4238	tags=42%, list=23%, signal=54%
REACTOME_ABC_FAMILY_PROTEINS_MEDIATED_TRANSPORT	REACTOME_ABC_FAMILY_PROTEINS_MEDIATED_TRANSPORT		33	-0.436666	-1.4256	0.0665189	0.211016	1	2481	tags=24%, list=13%, signal=28%
RIZ_ERYTHROID_DIFFERENTIATION_HEMGN	RIZ_ERYTHROID_DIFFERENTIATION_HEMGN		31	-0.398917	-1.42449	0.0577689	0.211903	1	2945	tags=42%, list=16%, signal=50%
MISHRA_CARCINOMA_ASSOCIATED_FIBROBLAST_DN	MISHRA_CARCINOMA_ASSOCIATED_FIBROBLAST_DN		24	-0.442966	-1.42317	0.0983607	0.213086	1	1636	tags=25%, list=9%, signal=27%
REACTOME_G_ALPHA1213_SIGNALLING_EVENTS	REACTOME_G_ALPHA1213_SIGNALLING_EVENTS		73	-0.395446	-1.42239	0.0924025	0.213706	1	3354	tags=33%, list=18%, signal=40%
LIU_VAV3_PROSTATE_CARCINOGENESIS_DN	LIU_VAV3_PROSTATE_CARCINOGENESIS_DN		16	-0.486729	-1.42177	0.103586	0.21414	1	2301	tags=38%, list=12%, signal=43%
HOWLIN_CITED1_TARGETS_1_DN	HOWLIN_CITED1_TARGETS_1_DN		35	-0.436404	-1.42139	0.114583	0.214234	1	1474	tags=26%, list=8%, signal=28%
DUAN_PRDM5_TARGETS	DUAN_PRDM5_TARGETS		76	-0.349432	-1.42117	0.0455487	0.214201	1	1308	tags=17%, list=7%, signal=18%
SHIN_B_CELL_LYMPHOMA_CLUSTER_9	SHIN_B_CELL_LYMPHOMA_CLUSTER_9		19	-0.515087	-1.42043	0.119522	0.21475	1	5625	tags=68%, list=30%, signal=98%
MASSARWEH_TAMOXIFEN_RESISTANCE_DN	MASSARWEH_TAMOXIFEN_RESISTANCE_DN		228	-0.313086	-1.42035	0.0461216	0.214582	1	3195	tags=28%, list=17%, signal=33%
ALONSO_METASTASIS_DN	ALONSO_METASTASIS_DN		24	-0.434454	-1.4197	0.0678643	0.214998	1	4664	tags=50%, list=25%, signal=67%
ROSS_AML_WITH_PML_RARA_FUSION	ROSS_AML_WITH_PML_RARA_FUSION		71	-0.374874	-1.41831	0.0708333	0.216236	1	2529	tags=27%, list=14%, signal=31%
VERHAAK_GLIOBLASTOMA_CLASSICAL	VERHAAK_GLIOBLASTOMA_CLASSICAL		155	-0.348085	-1.41772	0.0742972	0.216585	1	3729	tags=33%, list=20%, signal=41%
RUTELLA_RESPONSE_TO_CSF2RB_AND_IL4_DN	RUTELLA_RESPONSE_TO_CSF2RB_AND_IL4_DN		305	-0.344411	-1.41715	0.115385	0.216879	1	3710	tags=35%, list=20%, signal=43%
ZHAN_MULTIPLE_MYELOMA_CD1_UP	ZHAN_MULTIPLE_MYELOMA_CD1_UP		43	-0.39968	-1.41698	0.0816327	0.21682	1	4532	tags=44%, list=24%, signal=58%
REACTOME_SEMAPHORIN_INTERACTIONS	REACTOME_SEMAPHORIN_INTERACTIONS		64	-0.386119	-1.41645	0.0724346	0.217117	1	3205	tags=36%, list=17%, signal=43%
ELVIDGE_HYPOXIA_BY_DMOG_UP	ELVIDGE_HYPOXIA_BY_DMOG_UP		127	-0.380058	-1.41598	0.110236	0.217391	1	3913	tags=37%, list=21%, signal=46%
BIOCARTA_MYOSIN_PATHWAY	BIOCARTA_MYOSIN_PATHWAY		31	-0.449073	-1.41594	0.0940695	0.217168	1	3205	tags=32%, list=17%, signal=39%
REACTOME_THROMBIN_SIGNALLING_THROUGH_PROTEINASE_ACTIVATED_RECEPTORS_PARS	REACTOME_THROMBIN_SIGNALLING_THROUGH_PROTEINASE_ACTIVATED_RECEPTORS_PARS		32	-0.441903	-1.41555	0.0912951	0.217311	1	3282	tags=34%, list=18%, signal=42%
CONRAD_STEM_CELL	CONRAD_STEM_CELL		39	-0.375336	-1.4154	0.0709939	0.217237	1	2850	tags=28%, list=15%, signal=33%
SENGUPTA_NASOPHARYNGEAL_CARCINOMA_WITH_LMP1_DN	SENGUPTA_NASOPHARYNGEAL_CARCINOMA_WITH_LMP1_DN		157	-0.357468	-1.41485	0.0686869	0.217571	1	4631	tags=36%, list=25%, signal=48%
BRIDEAU_IMPRINTED_GENES	BRIDEAU_IMPRINTED_GENES		58	-0.379823	-1.41341	0.0711382	0.218886	1	2230	tags=21%, list=12%, signal=23%
MCBRYAN_PUBERTAL_BREAST_4_5WK_DN	MCBRYAN_PUBERTAL_BREAST_4_5WK_DN		180	-0.330693	-1.41285	0.0707071	0.21924	1	2296	tags=26%, list=12%, signal=29%
BIOCARTA_NOS1_PATHWAY	BIOCARTA_NOS1_PATHWAY		21	-0.45869	-1.41193	0.0892116	0.21992	1	3706	tags=48%, list=20%, signal=59%
TENEDINI_MEGAKARYOCYTE_MARKERS	TENEDINI_MEGAKARYOCYTE_MARKERS		65	-0.358662	-1.41168	0.07	0.219985	1	2196	tags=25%, list=12%, signal=28%
HOFMANN_MYELODYSPLASTIC_SYNDROM_HIGH_RISK_DN	HOFMANN_MYELODYSPLASTIC_SYNDROM_HIGH_RISK_DN		20	-0.460996	-1.41009	0.0577689	0.221429	1	5152	tags=50%, list=28%, signal=69%
HENDRICKS_SMARCA4_TARGETS_DN	HENDRICKS_SMARCA4_TARGETS_DN		47	-0.38219	-1.4095	0.0876827	0.221778	1	2875	tags=28%, list=15%, signal=33%
LOPES_METHYLATED_IN_COLON_CANCER_DN	LOPES_METHYLATED_IN_COLON_CANCER_DN		28	-0.419936	-1.4093	0.0681818	0.22173	1	2823	tags=32%, list=15%, signal=38%
SHARMA_PILOCYTIC_ASTROCYTOMA_LOCATION_UP	SHARMA_PILOCYTIC_ASTROCYTOMA_LOCATION_UP		22	-0.473624	-1.40884	0.108317	0.221956	1	2200	tags=32%, list=12%, signal=36%
ALONSO_METASTASIS_NEURAL_UP	ALONSO_METASTASIS_NEURAL_UP		17	-0.483151	-1.40877	0.0876827	0.221782	1	1123	tags=24%, list=6%, signal=25%
MIKKELSEN_IPS_LCP_WITH_H3K4ME3	MIKKELSEN_IPS_LCP_WITH_H3K4ME3		156	-0.331893	-1.40773	0.0669456	0.222654	1	3559	tags=27%, list=19%, signal=33%
KEGG_ASTHMA	KEGG_ASTHMA		26	-0.548863	-1.40679	0.176955	0.223389	1	6735	tags=69%, list=36%, signal=108%
KATSANOU_ELAVL1_TARGETS_DN	KATSANOU_ELAVL1_TARGETS_DN		141	-0.303617	-1.40638	0.0338645	0.223532	1	2728	tags=28%, list=15%, signal=32%
REACTOME_INTERACTION_BETWEEN_L1_AND_ANKYRINS	REACTOME_INTERACTION_BETWEEN_L1_AND_ANKYRINS		21	-0.477466	-1.4062	0.108871	0.223466	1	3209	tags=29%, list=17%, signal=34%
DUNNE_TARGETS_OF_AML1_MTG8_FUSION_UP	DUNNE_TARGETS_OF_AML1_MTG8_FUSION_UP		50	-0.476805	-1.40476	0.125786	0.224784	1	5319	tags=62%, list=28%, signal=86%
WANG_PROSTATE_CANCER_ANDROGEN_INDEPENDENT	WANG_PROSTATE_CANCER_ANDROGEN_INDEPENDENT		57	-0.349687	-1.4043	0.056338	0.225006	1	2690	tags=26%, list=14%, signal=31%
REACTOME_DOWNSTREAM_SIGNALING_OF_ACTIVATED_FGFR	REACTOME_DOWNSTREAM_SIGNALING_OF_ACTIVATED_FGFR		96	-0.343245	-1.4043	0.0762887	0.224759	1	1629	tags=18%, list=9%, signal=19%
PID_VEGFR1_PATHWAY	PID_VEGFR1_PATHWAY		26	-0.449141	-1.40418	0.114458	0.224646	1	3452	tags=46%, list=18%, signal=57%
MCBRYAN_PUBERTAL_BREAST_6_7WK_DN	MCBRYAN_PUBERTAL_BREAST_6_7WK_DN		76	-0.364904	-1.40417	0.0761719	0.224398	1	1671	tags=24%, list=9%, signal=26%
ELVIDGE_HYPOXIA_UP	ELVIDGE_HYPOXIA_UP		164	-0.362108	-1.40382	0.110672	0.224526	1	3913	tags=37%, list=21%, signal=46%
REACTOME_FORMATION_OF_FIBRIN_CLOT_CLOTTING_CASCADE	REACTOME_FORMATION_OF_FIBRIN_CLOT_CLOTTING_CASCADE		30	-0.50555	-1.40362	0.0969072	0.224533	1	2497	tags=27%, list=13%, signal=31%
ROVERSI_GLIOMA_COPY_NUMBER_DN	ROVERSI_GLIOMA_COPY_NUMBER_DN		53	-0.36981	-1.40277	0.0781563	0.225156	1	2324	tags=23%, list=12%, signal=26%
BHAT_ESR1_TARGETS_NOT_VIA_AKT1_DN	BHAT_ESR1_TARGETS_NOT_VIA_AKT1_DN		85	-0.384515	-1.4017	0.108652	0.226046	1	4037	tags=41%, list=22%, signal=52%
REACTOME_ACTIVATION_OF_NMDA_RECEPTOR_UPON_GLUTAMATE_BINDING_AND_POSTSYNAPTIC_EVENTS	REACTOME_ACTIVATION_OF_NMDA_RECEPTOR_UPON_GLUTAMATE_BINDING_AND_POSTSYNAPTIC_EVENTS		37	-0.412454	-1.4005	0.0849673	0.227105	1	2535	tags=35%, list=14%, signal=41%
BIOCARTA_CARDIACEGF_PATHWAY	BIOCARTA_CARDIACEGF_PATHWAY		18	-0.455598	-1.40038	0.0816327	0.226983	1	2595	tags=33%, list=14%, signal=39%
YANG_BCL3_TARGETS_UP	YANG_BCL3_TARGETS_UP		344	-0.280449	-1.39973	0.0412371	0.22746	1	2628	tags=25%, list=14%, signal=29%
BEIER_GLIOMA_STEM_CELL_DN	BEIER_GLIOMA_STEM_CELL_DN		62	-0.383645	-1.39914	0.0956175	0.227817	1	2903	tags=24%, list=16%, signal=29%
FLECHNER_BIOPSY_KIDNEY_TRANSPLANT_REJECTED_VS_OK_UP	FLECHNER_BIOPSY_KIDNEY_TRANSPLANT_REJECTED_VS_OK_UP		85	-0.493068	-1.39914	0.176707	0.227563	1	4405	tags=52%, list=24%, signal=67%
STEIN_ESTROGEN_RESPONSE_NOT_VIA_ESRRA	STEIN_ESTROGEN_RESPONSE_NOT_VIA_ESRRA		18	-0.473381	-1.39871	0.109533	0.227763	1	2828	tags=33%, list=15%, signal=39%
GRADE_COLON_VS_RECTAL_CANCER_UP	GRADE_COLON_VS_RECTAL_CANCER_UP		30	-0.416143	-1.39864	0.104418	0.227577	1	1442	tags=30%, list=8%, signal=32%
FARMER_BREAST_CANCER_CLUSTER_1	FARMER_BREAST_CANCER_CLUSTER_1		39	-0.568734	-1.3975	0.183468	0.228619	1	5291	tags=69%, list=28%, signal=96%
KYNG_DNA_DAMAGE_BY_GAMMA_AND_UV_RADIATION	KYNG_DNA_DAMAGE_BY_GAMMA_AND_UV_RADIATION		87	-0.335219	-1.3967	0.0462777	0.229259	1	2193	tags=23%, list=12%, signal=26%
ZHENG_IL22_SIGNALING_DN	ZHENG_IL22_SIGNALING_DN		38	-0.382362	-1.39556	0.0688259	0.230222	1	2286	tags=26%, list=12%, signal=30%
BERENJENO_ROCK_SIGNALING_NOT_VIA_RHOA_UP	BERENJENO_ROCK_SIGNALING_NOT_VIA_RHOA_UP		28	-0.424456	-1.39421	0.0862423	0.231416	1	573	tags=18%, list=3%, signal=18%
WOOD_EBV_EBNA1_TARGETS_DN	WOOD_EBV_EBNA1_TARGETS_DN		47	-0.403361	-1.39374	0.109344	0.231688	1	1768	tags=28%, list=9%, signal=30%
FERREIRA_EWINGS_SARCOMA_UNSTABLE_VS_STABLE_DN	FERREIRA_EWINGS_SARCOMA_UNSTABLE_VS_STABLE_DN		93	-0.355432	-1.39065	0.0959184	0.234822	1	2651	tags=24%, list=14%, signal=27%
GAZDA_DIAMOND_BLACKFAN_ANEMIA_PROGENITOR_UP	GAZDA_DIAMOND_BLACKFAN_ANEMIA_PROGENITOR_UP		38	-0.400654	-1.38861	0.0894942	0.236872	1	4645	tags=34%, list=25%, signal=45%
KRASNOSELSKAYA_ILF3_TARGETS_UP	KRASNOSELSKAYA_ILF3_TARGETS_UP		38	-0.480095	-1.3884	0.155556	0.236834	1	2353	tags=29%, list=13%, signal=33%
HERNANDEZ_MITOTIC_ARREST_BY_DOCETAXEL_2_DN	HERNANDEZ_MITOTIC_ARREST_BY_DOCETAXEL_2_DN		18	-0.443253	-1.38739	0.0955285	0.237646	1	2246	tags=39%, list=12%, signal=44%
PID_ANGIOPOIETIN_RECEPTOR_PATHWAY	PID_ANGIOPOIETIN_RECEPTOR_PATHWAY		50	-0.389682	-1.38646	0.11022	0.238365	1	3623	tags=36%, list=19%, signal=45%
SCHAEFFER_SOX9_TARGETS_IN_PROSTATE_DEVELOPMENT_DN	SCHAEFFER_SOX9_TARGETS_IN_PROSTATE_DEVELOPMENT_DN		44	-0.396778	-1.3863	0.118503	0.238295	1	3054	tags=43%, list=16%, signal=51%
REACTOME_ABCA_TRANSPORTERS_IN_LIPID_HOMEOSTASIS	REACTOME_ABCA_TRANSPORTERS_IN_LIPID_HOMEOSTASIS		17	-0.481315	-1.38554	0.122056	0.238893	1	2134	tags=29%, list=11%, signal=33%
LIEN_BREAST_CARCINOMA_METAPLASTIC_VS_DUCTAL_UP	LIEN_BREAST_CARCINOMA_METAPLASTIC_VS_DUCTAL_UP		76	-0.366694	-1.38399	0.104126	0.240391	1	3007	tags=28%, list=16%, signal=33%
REACTOME_REGULATION_OF_INSULIN_SECRETION	REACTOME_REGULATION_OF_INSULIN_SECRETION		88	-0.373448	-1.38294	0.0833333	0.241329	1	3452	tags=33%, list=18%, signal=40%
LEE_LIVER_CANCER_CIPROFIBRATE_UP	LEE_LIVER_CANCER_CIPROFIBRATE_UP		60	-0.362217	-1.38243	0.060166	0.241602	1	3794	tags=33%, list=20%, signal=42%
ELVIDGE_HIF1A_TARGETS_DN	ELVIDGE_HIF1A_TARGETS_DN		88	-0.374579	-1.38196	0.11068	0.241884	1	3444	tags=30%, list=18%, signal=36%
REACTOME_THROMBOXANE_SIGNALLING_THROUGH_TP_RECEPTOR	REACTOME_THROMBOXANE_SIGNALLING_THROUGH_TP_RECEPTOR		23	-0.469229	-1.38169	0.139918	0.241907	1	3801	tags=39%, list=20%, signal=49%
MEISSNER_BRAIN_HCP_WITH_H3K4ME2_AND_H3K27ME3	MEISSNER_BRAIN_HCP_WITH_H3K4ME2_AND_H3K27ME3		57	-0.361412	-1.38153	0.0907298	0.241809	1	3719	tags=37%, list=20%, signal=46%
LE_EGR2_TARGETS_DN	LE_EGR2_TARGETS_DN		106	-0.341566	-1.38091	0.1	0.242205	1	2548	tags=25%, list=14%, signal=29%
BILBAN_B_CLL_LPL_DN	BILBAN_B_CLL_LPL_DN		42	-0.402666	-1.3808	0.1	0.242042	1	2936	tags=38%, list=16%, signal=45%
HADDAD_T_LYMPHOCYTE_AND_NK_PROGENITOR_DN	HADDAD_T_LYMPHOCYTE_AND_NK_PROGENITOR_DN		59	-0.452986	-1.37809	0.109533	0.244807	1	5098	tags=68%, list=27%, signal=93%
ZHANG_GATA6_TARGETS_UP	ZHANG_GATA6_TARGETS_UP		15	-0.4919	-1.37665	0.112016	0.246142	1	3495	tags=53%, list=19%, signal=66%
KAMIKUBO_MYELOID_MN1_NETWORK	KAMIKUBO_MYELOID_MN1_NETWORK		19	-0.460935	-1.37664	0.123772	0.245882	1	3649	tags=42%, list=20%, signal=52%
HERNANDEZ_MITOTIC_ARREST_BY_DOCETAXEL_1_DN	HERNANDEZ_MITOTIC_ARREST_BY_DOCETAXEL_1_DN		36	-0.398154	-1.37652	0.118812	0.245737	1	1944	tags=33%, list=10%, signal=37%
REACTOME_G_PROTEIN_BETA_GAMMA_SIGNALLING	REACTOME_G_PROTEIN_BETA_GAMMA_SIGNALLING		28	-0.452424	-1.37641	0.135021	0.245601	1	2817	tags=36%, list=15%, signal=42%
RHEIN_ALL_GLUCOCORTICOID_THERAPY_UP	RHEIN_ALL_GLUCOCORTICOID_THERAPY_UP		73	-0.396704	-1.37463	0.118577	0.247334	1	3189	tags=33%, list=17%, signal=39%
FERRANDO_T_ALL_WITH_MLL_ENL_FUSION_UP	FERRANDO_T_ALL_WITH_MLL_ENL_FUSION_UP		85	-0.352623	-1.37371	0.114173	0.248203	1	3053	tags=31%, list=16%, signal=36%
IIZUKA_LIVER_CANCER_PROGRESSION_L0_L1_UP	IIZUKA_LIVER_CANCER_PROGRESSION_L0_L1_UP		17	-0.45568	-1.37335	0.105159	0.248338	1	2710	tags=29%, list=14%, signal=34%
KANNAN_TP53_TARGETS_UP	KANNAN_TP53_TARGETS_UP		56	-0.380715	-1.37282	0.116232	0.248651	1	2535	tags=29%, list=14%, signal=33%
LEE_EARLY_T_LYMPHOCYTE_DN	LEE_EARLY_T_LYMPHOCYTE_DN		53	-0.443253	-1.37272	0.192547	0.248484	1	4470	tags=49%, list=24%, signal=64%
NING_CHRONIC_OBSTRUCTIVE_PULMONARY_DISEASE_DN	NING_CHRONIC_OBSTRUCTIVE_PULMONARY_DISEASE_DN		113	-0.350667	-1.37272	0.106	0.248215	1	2063	tags=23%, list=11%, signal=26%
BOYLAN_MULTIPLE_MYELOMA_C_DN	BOYLAN_MULTIPLE_MYELOMA_C_DN		53	-0.36551	-1.37261	0.093361	0.248062	1	3033	tags=28%, list=16%, signal=34%
REACTOME_UNBLOCKING_OF_NMDA_RECEPTOR_GLUTAMATE_BINDING_AND_ACTIVATION	REACTOME_UNBLOCKING_OF_NMDA_RECEPTOR_GLUTAMATE_BINDING_AND_ACTIVATION		15	-0.499205	-1.37135	0.103448	0.249174	1	3139	tags=53%, list=17%, signal=64%
GRADE_COLON_CANCER_DN	GRADE_COLON_CANCER_DN		31	-0.406617	-1.37105	0.111538	0.249234	1	2617	tags=29%, list=14%, signal=34%
LEE_AGING_CEREBELLUM_DN	LEE_AGING_CEREBELLUM_DN		83	-0.320268	-1.37104	0.0488281	0.248975	1	2888	tags=24%, list=15%, signal=28%
ROSS_AML_OF_FAB_M7_TYPE	ROSS_AML_OF_FAB_M7_TYPE		64	-0.341264	-1.36987	0.0836735	0.250036	1	2563	tags=25%, list=14%, signal=29%
GAVIN_FOXP3_TARGETS_CLUSTER_P3	GAVIN_FOXP3_TARGETS_CLUSTER_P3		151	-0.332045	-1.36896	0.105368	0.250881	1	3469	tags=29%, list=19%, signal=35%
HOFFMANN_IMMATURE_TO_MATURE_B_LYMPHOCYTE_UP	HOFFMANN_IMMATURE_TO_MATURE_B_LYMPHOCYTE_UP		41	-0.382823	-1.36893	0.124236	0.250647	1	3208	tags=34%, list=17%, signal=41%
BOSCO_TH1_CYTOTOXIC_MODULE	BOSCO_TH1_CYTOTOXIC_MODULE		103	-0.444161	-1.36803	0.18711	0.251448	1	4417	tags=50%, list=24%, signal=64%
MOREAUX_MULTIPLE_MYELOMA_BY_TACI_UP	MOREAUX_MULTIPLE_MYELOMA_BY_TACI_UP		384	-0.282059	-1.36786	0.0389344	0.251381	1	3686	tags=28%, list=20%, signal=34%
LEIN_MEDULLA_MARKERS	LEIN_MEDULLA_MARKERS		77	-0.317929	-1.3669	0.039604	0.2522	1	2060	tags=19%, list=11%, signal=22%
MIKKELSEN_NPC_HCP_WITH_H3K27ME3	MIKKELSEN_NPC_HCP_WITH_H3K27ME3		329	-0.328336	-1.36656	0.0804829	0.252339	1	3665	tags=27%, list=20%, signal=33%
GERY_CEBP_TARGETS	GERY_CEBP_TARGETS		124	-0.346597	-1.36586	0.127049	0.252869	1	3175	tags=27%, list=17%, signal=33%
ST_WNT_BETA_CATENIN_PATHWAY	ST_WNT_BETA_CATENIN_PATHWAY		34	-0.405087	-1.36562	0.119433	0.252876	1	2261	tags=26%, list=12%, signal=30%
GARGALOVIC_RESPONSE_TO_OXIDIZED_PHOSPHOLIPIDS_GREY_UP	GARGALOVIC_RESPONSE_TO_OXIDIZED_PHOSPHOLIPIDS_GREY_UP		16	-0.506267	-1.36544	0.154309	0.252806	1	3189	tags=50%, list=17%, signal=60%
REACTOME_HS_GAG_BIOSYNTHESIS	REACTOME_HS_GAG_BIOSYNTHESIS		30	-0.422123	-1.36527	0.113281	0.252739	1	4027	tags=33%, list=22%, signal=42%
KORKOLA_TERATOMA_UP	KORKOLA_TERATOMA_UP		16	-0.531823	-1.36501	0.175258	0.252774	1	610	tags=19%, list=3%, signal=19%
WANG_RESPONSE_TO_GSK3_INHIBITOR_SB216763_UP	WANG_RESPONSE_TO_GSK3_INHIBITOR_SB216763_UP		322	-0.324016	-1.36332	0.144869	0.254304	1	3631	tags=29%, list=19%, signal=35%
REACTOME_NUCLEAR_RECEPTOR_TRANSCRIPTION_PATHWAY	REACTOME_NUCLEAR_RECEPTOR_TRANSCRIPTION_PATHWAY		47	-0.372057	-1.36318	0.0769231	0.254198	1	2269	tags=21%, list=12%, signal=24%
BREUHAHN_GROWTH_FACTOR_SIGNALING_IN_LIVER_CANCER	BREUHAHN_GROWTH_FACTOR_SIGNALING_IN_LIVER_CANCER		22	-0.443026	-1.3611	0.116667	0.256361	1	2640	tags=32%, list=14%, signal=37%
MULLIGHAN_NPM1_SIGNATURE_3_DN	MULLIGHAN_NPM1_SIGNATURE_3_DN		153	-0.31524	-1.36025	0.0658436	0.257063	1	2499	tags=26%, list=13%, signal=30%
HENDRICKS_SMARCA4_TARGETS_UP	HENDRICKS_SMARCA4_TARGETS_UP		52	-0.407316	-1.35952	0.15275	0.257612	1	1819	tags=23%, list=10%, signal=25%
BROWNE_HCMV_INFECTION_4HR_UP	BROWNE_HCMV_INFECTION_4HR_UP		52	-0.371603	-1.35941	0.111969	0.257467	1	3033	tags=27%, list=16%, signal=32%
REACTOME_NEGATIVE_REGULATION_OF_FGFR_SIGNALING	REACTOME_NEGATIVE_REGULATION_OF_FGFR_SIGNALING		36	-0.394158	-1.35827	0.10609	0.258506	1	1185	tags=17%, list=6%, signal=18%
DOANE_RESPONSE_TO_ANDROGEN_DN	DOANE_RESPONSE_TO_ANDROGEN_DN		226	-0.285499	-1.35682	0.0724346	0.259933	1	3149	tags=29%, list=17%, signal=34%
OSADA_ASCL1_TARGETS_UP	OSADA_ASCL1_TARGETS_UP		45	-0.410905	-1.35619	0.133038	0.260354	1	5343	tags=58%, list=29%, signal=81%
MCBRYAN_PUBERTAL_BREAST_6_7WK_UP	MCBRYAN_PUBERTAL_BREAST_6_7WK_UP		186	-0.324284	-1.35487	0.0921844	0.261667	1	2399	tags=22%, list=13%, signal=24%
MCCLUNG_CREB1_TARGETS_DN	MCCLUNG_CREB1_TARGETS_DN		55	-0.343321	-1.35467	0.0846154	0.261644	1	3593	tags=35%, list=19%, signal=43%
NIELSEN_SYNOVIAL_SARCOMA_DN	NIELSEN_SYNOVIAL_SARCOMA_DN		19	-0.587395	-1.35252	0.197034	0.263771	1	3632	tags=47%, list=19%, signal=59%
COLIN_PILOCYTIC_ASTROCYTOMA_VS_GLIOBLASTOMA_DN	COLIN_PILOCYTIC_ASTROCYTOMA_VS_GLIOBLASTOMA_DN		28	-0.427731	-1.35238	0.143145	0.263643	1	2300	tags=32%, list=12%, signal=37%
[truncated: 1,078 more rows]

## Sheet: Low expressino of ARMCX2
NAME	GS<br> follow link to MSigDB	GS DETAILS	SIZE	ES	NES	NOM p-val	FDR q-val	FWER p-val	RANK AT MAX	LEADING EDGE
[truncated: 1,762 more rows]

[truncated: 1 more sheets: High expression of ARMCX2]
