# Supplementary material for: ARMCX Family Gene Expression Analysis and Potential Prognostic Biomarkers for Prediction of Clinical Outcome in Patients with Gastric Carcinoma
Source: Biomed Res Int. 2020 Jun 30;2020:3575038. doi: 10.1155/2020/3575038 (PMC7345962; doi:10.1155/2020/3575038)
Supplement: Supplementary 2 — Supplementary Table 2: GSEA GO (c5.all.v6.2.symbols.gmt) functional analysis results of ARMCX1 and ARMCX2. [file 3575038.f2.xlsx]

## Sheet: Low expression of ARMCX1
NAME	GS<br> follow link to MSigDB	GS DETAILS	SIZE	ES	NES	NOM p-val	FDR q-val	FWER p-val	RANK AT MAX	LEADING EDGE
GO_CHROMOSOME_CENTROMERIC_REGION	GO_CHROMOSOME_CENTROMERIC_REGION	Details ...	155	0.654431	2.20275	0	0.0339007	0.029	2610	tags=54%, list=14%, signal=62%
GO_CONDENSED_CHROMOSOME_CENTROMERIC_REGION	GO_CONDENSED_CHROMOSOME_CENTROMERIC_REGION	Details ...	84	0.723741	2.19002	0	0.0210997	0.034	2610	tags=62%, list=14%, signal=72%
GO_KINETOCHORE	GO_KINETOCHORE	Details ...	104	0.674566	2.1865	0	0.0149898	0.036	2610	tags=56%, list=14%, signal=64%
GO_MITOTIC_SISTER_CHROMATID_SEGREGATION	GO_MITOTIC_SISTER_CHROMATID_SEGREGATION	Details ...	88	0.704523	2.18602	0.00197239	0.0112424	0.036	3696	tags=72%, list=20%, signal=89%
GO_DNA_REPAIR	GO_DNA_REPAIR	Details ...	435	0.574545	2.17345	0	0.0109466	0.041	4978	tags=61%, list=27%, signal=81%
GO_CONDENSED_CHROMOSOME	GO_CONDENSED_CHROMOSOME	Details ...	171	0.628539	2.1677	0	0.0108408	0.049	3225	tags=53%, list=17%, signal=63%
GO_SISTER_CHROMATID_SEGREGATION	GO_SISTER_CHROMATID_SEGREGATION	Details ...	164	0.681943	2.16757	0	0.00929215	0.049	2337	tags=57%, list=12%, signal=65%
GO_CHROMOSOMAL_REGION	GO_CHROMOSOMAL_REGION	Details ...	300	0.587393	2.15854	0	0.00868494	0.053	2951	tags=47%, list=16%, signal=55%
GO_SISTER_CHROMATID_COHESION	GO_SISTER_CHROMATID_COHESION	Details ...	101	0.705038	2.15597	0	0.00825732	0.056	2031	tags=58%, list=11%, signal=65%
GO_DNA_RECOMBINATION	GO_DNA_RECOMBINATION	Details ...	192	0.605015	2.153	0	0.00779676	0.06	4880	tags=63%, list=26%, signal=84%
GO_DOUBLE_STRAND_BREAK_REPAIR	GO_DOUBLE_STRAND_BREAK_REPAIR	Details ...	152	0.589654	2.14653	0	0.00812824	0.064	4880	tags=62%, list=26%, signal=83%
GO_CHROMOSOME_SEGREGATION	GO_CHROMOSOME_SEGREGATION	Details ...	250	0.609984	2.13076	0	0.0105789	0.096	2777	tags=52%, list=15%, signal=60%
GO_COENZYME_BIOSYNTHETIC_PROCESS	GO_COENZYME_BIOSYNTHETIC_PROCESS	Details ...	114	0.571825	2.11748	0	0.012287	0.113	4701	tags=57%, list=25%, signal=76%
GO_CHROMOSOME_CONDENSATION	GO_CHROMOSOME_CONDENSATION	Details ...	26	0.772552	2.11598	0	0.0115677	0.113	1823	tags=69%, list=10%, signal=77%
GO_SIGNAL_TRANSDUCTION_IN_RESPONSE_TO_DNA_DAMAGE	GO_SIGNAL_TRANSDUCTION_IN_RESPONSE_TO_DNA_DAMAGE	Details ...	91	0.561399	2.11031	0	0.0120311	0.123	3453	tags=45%, list=18%, signal=55%
GO_NEGATIVE_REGULATION_OF_CELL_DIVISION	GO_NEGATIVE_REGULATION_OF_CELL_DIVISION	Details ...	57	0.598849	2.1102	0	0.0113552	0.123	2281	tags=47%, list=12%, signal=54%
GO_NUCLEAR_CHROMOSOME_SEGREGATION	GO_NUCLEAR_CHROMOSOME_SEGREGATION	Details ...	207	0.610714	2.10483	0	0.0113781	0.124	2337	tags=49%, list=12%, signal=55%
GO_NUCLEIC_ACID_PHOSPHODIESTER_BOND_HYDROLYSIS	GO_NUCLEIC_ACID_PHOSPHODIESTER_BOND_HYDROLYSIS	Details ...	231	0.555667	2.1017	0	0.0114107	0.133	4815	tags=57%, list=26%, signal=75%
GO_MITOTIC_NUCLEAR_DIVISION	GO_MITOTIC_NUCLEAR_DIVISION	Details ...	340	0.56157	2.09836	0.00203666	0.0113094	0.137	3729	tags=54%, list=20%, signal=66%
GO_DNA_DEPENDENT_DNA_REPLICATION	GO_DNA_DEPENDENT_DNA_REPLICATION	Details ...	90	0.679811	2.09525	0.00203666	0.0112633	0.143	4078	tags=71%, list=22%, signal=90%
GO_ORGANELLE_FISSION	GO_ORGANELLE_FISSION	Details ...	454	0.526234	2.09239	0	0.0111488	0.146	4756	tags=54%, list=25%, signal=70%
GO_BASE_EXCISION_REPAIR	GO_BASE_EXCISION_REPAIR	Details ...	39	0.669462	2.08579	0	0.0118931	0.16	5268	tags=77%, list=28%, signal=107%
GO_DNA_REPLICATION	GO_DNA_REPLICATION	Details ...	192	0.608332	2.08565	0.00408163	0.011376	0.16	2197	tags=50%, list=12%, signal=56%
GO_COFACTOR_BIOSYNTHETIC_PROCESS	GO_COFACTOR_BIOSYNTHETIC_PROCESS	Details ...	153	0.569411	2.08286	0	0.0115594	0.168	4701	tags=56%, list=25%, signal=74%
GO_DNA_BIOSYNTHETIC_PROCESS	GO_DNA_BIOSYNTHETIC_PROCESS	Details ...	109	0.613408	2.07678	0	0.0120054	0.178	3089	tags=53%, list=17%, signal=63%
GO_TETRAPYRROLE_BIOSYNTHETIC_PROCESS	GO_TETRAPYRROLE_BIOSYNTHETIC_PROCESS	Details ...	27	0.712027	2.06817	0	0.0129728	0.198	2386	tags=56%, list=13%, signal=64%
GO_PURINE_NTP_DEPENDENT_HELICASE_ACTIVITY	GO_PURINE_NTP_DEPENDENT_HELICASE_ACTIVITY	Details ...	95	0.621858	2.06636	0	0.0128276	0.203	3539	tags=56%, list=19%, signal=68%
GO_DNA_CONFORMATION_CHANGE	GO_DNA_CONFORMATION_CHANGE	Details ...	248	0.565592	2.05836	0	0.0137975	0.221	4328	tags=56%, list=23%, signal=71%
GO_NUCLEOID	GO_NUCLEOID	Details ...	39	0.765782	2.05532	0	0.0137963	0.228	2811	tags=77%, list=15%, signal=90%
GO_POSITIVE_REGULATION_OF_TRANSLATIONAL_INITIATION	GO_POSITIVE_REGULATION_OF_TRANSLATIONAL_INITIATION	Details ...	22	0.679089	2.05469	0	0.0134405	0.229	1984	tags=41%, list=11%, signal=46%
GO_RIBONUCLEOPROTEIN_COMPLEX_LOCALIZATION	GO_RIBONUCLEOPROTEIN_COMPLEX_LOCALIZATION	Details ...	112	0.650722	2.05018	0	0.0139643	0.242	3805	tags=67%, list=20%, signal=84%
GO_RNA_PHOSPHODIESTER_BOND_HYDROLYSIS	GO_RNA_PHOSPHODIESTER_BOND_HYDROLYSIS	Details ...	107	0.5947	2.04923	0	0.013677	0.245	4017	tags=59%, list=21%, signal=75%
GO_NCRNA_METABOLIC_PROCESS	GO_NCRNA_METABOLIC_PROCESS	Details ...	499	0.612583	2.04804	0	0.0135828	0.245	5738	tags=75%, list=31%, signal=105%
GO_RIBONUCLEOPROTEIN_COMPLEX_BINDING	GO_RIBONUCLEOPROTEIN_COMPLEX_BINDING	Details ...	89	0.597296	2.04675	0	0.013532	0.249	4532	tags=66%, list=24%, signal=87%
GO_RNA_3_END_PROCESSING	GO_RNA_3_END_PROCESSING	Details ...	96	0.64158	2.04637	0	0.0132235	0.25	5477	tags=76%, list=29%, signal=107%
GO_NUCLEASE_ACTIVITY	GO_NUCLEASE_ACTIVITY	Details ...	185	0.534115	2.04585	0	0.0128562	0.25	5589	tags=59%, list=30%, signal=83%
GO_GENE_SILENCING_BY_RNA	GO_GENE_SILENCING_BY_RNA	Details ...	130	0.556149	2.04316	0	0.0129239	0.257	5170	tags=59%, list=28%, signal=81%
GO_DNA_REPLICATION_INITIATION	GO_DNA_REPLICATION_INITIATION	Details ...	29	0.767223	2.04197	0	0.0127743	0.262	1750	tags=69%, list=9%, signal=76%
GO_NCRNA_TRANSCRIPTION	GO_NCRNA_TRANSCRIPTION	Details ...	80	0.602818	2.03967	0	0.0128914	0.268	5625	tags=74%, list=30%, signal=105%
GO_CELL_CYCLE_CHECKPOINT	GO_CELL_CYCLE_CHECKPOINT	Details ...	180	0.534786	2.03656	0	0.0130155	0.274	3601	tags=47%, list=19%, signal=57%
GO_NUCLEAR_EXPORT	GO_NUCLEAR_EXPORT	Details ...	139	0.602711	2.03593	0	0.012852	0.276	3805	tags=60%, list=20%, signal=75%
GO_NUCLEOTIDYLTRANSFERASE_ACTIVITY	GO_NUCLEOTIDYLTRANSFERASE_ACTIVITY	Details ...	123	0.547287	2.03228	0	0.0132666	0.285	5776	tags=66%, list=31%, signal=95%
GO_SNRNA_METABOLIC_PROCESS	GO_SNRNA_METABOLIC_PROCESS	Details ...	74	0.621647	2.02952	0	0.0136549	0.299	5625	tags=78%, list=30%, signal=112%
GO_RNA_SPLICING_VIA_TRANSESTERIFICATION_REACTIONS	GO_RNA_SPLICING_VIA_TRANSESTERIFICATION_REACTIONS	Details ...	258	0.599631	2.02814	0	0.0136388	0.302	5042	tags=70%, list=27%, signal=94%
GO_TELOMERE_MAINTENANCE_VIA_RECOMBINATION	GO_TELOMERE_MAINTENANCE_VIA_RECOMBINATION	Details ...	32	0.770205	2.02604	0.00209205	0.0136825	0.304	3022	tags=78%, list=16%, signal=93%
GO_DNA_INTEGRITY_CHECKPOINT	GO_DNA_INTEGRITY_CHECKPOINT	Details ...	136	0.532842	2.02484	0	0.0137382	0.307	5268	tags=55%, list=28%, signal=76%
GO_TELOMERE_ORGANIZATION	GO_TELOMERE_ORGANIZATION	Details ...	102	0.577777	2.02481	0.0020284	0.0134459	0.307	5112	tags=63%, list=27%, signal=86%
GO_CENTROMERE_COMPLEX_ASSEMBLY	GO_CENTROMERE_COMPLEX_ASSEMBLY	Details ...	43	0.710882	2.02446	0.00206612	0.0132232	0.307	3583	tags=67%, list=19%, signal=83%
GO_CELL_DIVISION	GO_CELL_DIVISION	Details ...	426	0.497164	2.02392	0.00204082	0.0130854	0.31	4742	tags=56%, list=25%, signal=73%
GO_METHYLTRANSFERASE_COMPLEX	GO_METHYLTRANSFERASE_COMPLEX	Details ...	83	0.590146	2.02274	0	0.0130365	0.312	3670	tags=57%, list=20%, signal=70%
GO_TRNA_METABOLIC_PROCESS	GO_TRNA_METABOLIC_PROCESS	Details ...	166	0.648597	2.01988	0	0.0132184	0.317	5301	tags=80%, list=28%, signal=110%
GO_TRNA_PROCESSING	GO_TRNA_PROCESSING	Details ...	106	0.637491	2.01964	0	0.0130193	0.32	5775	tags=81%, list=31%, signal=117%
GO_MRNA_3_END_PROCESSING	GO_MRNA_3_END_PROCESSING	Details ...	71	0.64998	2.0187	0	0.0129764	0.325	4900	tags=72%, list=26%, signal=97%
GO_RIBONUCLEOPROTEIN_COMPLEX_SUBUNIT_ORGANIZATION	GO_RIBONUCLEOPROTEIN_COMPLEX_SUBUNIT_ORGANIZATION	Details ...	185	0.609311	2.0167	0	0.0131103	0.33	5731	tags=76%, list=31%, signal=108%
GO_CHROMOSOME_TELOMERIC_REGION	GO_CHROMOSOME_TELOMERIC_REGION	Details ...	151	0.539839	2.01645	0.00199601	0.0129231	0.331	4501	tags=51%, list=24%, signal=67%
GO_ATP_DEPENDENT_CHROMATIN_REMODELING	GO_ATP_DEPENDENT_CHROMATIN_REMODELING	Details ...	67	0.623061	2.01616	0.00200803	0.0127323	0.331	4224	tags=61%, list=23%, signal=79%
GO_HELICASE_ACTIVITY	GO_HELICASE_ACTIVITY	Details ...	148	0.580118	2.01511	0	0.0127625	0.336	3583	tags=51%, list=19%, signal=63%
GO_DNA_GEOMETRIC_CHANGE	GO_DNA_GEOMETRIC_CHANGE	Details ...	77	0.630332	2.01477	0	0.0125658	0.336	4092	tags=61%, list=22%, signal=78%
GO_NEGATIVE_REGULATION_OF_MITOTIC_NUCLEAR_DIVISION	GO_NEGATIVE_REGULATION_OF_MITOTIC_NUCLEAR_DIVISION	Details ...	32	0.652024	2.01301	0	0.0125801	0.34	2281	tags=53%, list=12%, signal=60%
GO_DAMAGED_DNA_BINDING	GO_DAMAGED_DNA_BINDING	Details ...	62	0.601064	2.01281	0	0.0123911	0.34	3838	tags=60%, list=21%, signal=75%
GO_RECOMBINATIONAL_REPAIR	GO_RECOMBINATIONAL_REPAIR	Details ...	70	0.624562	2.01219	0.00207469	0.0123067	0.342	4880	tags=64%, list=26%, signal=87%
GO_RNA_POLYADENYLATION	GO_RNA_POLYADENYLATION	Details ...	29	0.704334	2.0097	0	0.0125277	0.349	3245	tags=66%, list=17%, signal=79%
GO_MITOTIC_DNA_INTEGRITY_CHECKPOINT	GO_MITOTIC_DNA_INTEGRITY_CHECKPOINT	Details ...	93	0.538393	2.00812	0	0.0126362	0.353	5268	tags=54%, list=28%, signal=74%
GO_REGULATION_OF_CENTROSOME_CYCLE	GO_REGULATION_OF_CENTROSOME_CYCLE	Details ...	38	0.66123	2.0075	0.0020284	0.0125095	0.353	2832	tags=55%, list=15%, signal=65%
GO_HISTONE_EXCHANGE	GO_HISTONE_EXCHANGE	Details ...	46	0.676046	2.00706	0.00204918	0.0124391	0.355	3845	tags=65%, list=21%, signal=82%
GO_HEME_BIOSYNTHETIC_PROCESS	GO_HEME_BIOSYNTHETIC_PROCESS	Details ...	20	0.732689	2.00693	0	0.0122621	0.355	2386	tags=55%, list=13%, signal=63%
GO_TELOMERASE_HOLOENZYME_COMPLEX	GO_TELOMERASE_HOLOENZYME_COMPLEX	Details ...	19	0.748663	2.00662	0	0.0121589	0.356	2339	tags=58%, list=13%, signal=66%
GO_CHROMOSOME_LOCALIZATION	GO_CHROMOSOME_LOCALIZATION	Details ...	57	0.585622	2.00404	0.00196078	0.0123973	0.362	2462	tags=51%, list=13%, signal=58%
GO_NUCLEOTIDE_PHOSPHORYLATION	GO_NUCLEOTIDE_PHOSPHORYLATION	Details ...	56	0.563436	2.00012	0	0.0128448	0.375	3445	tags=45%, list=18%, signal=55%
GO_REGULATION_OF_CHROMOSOME_SEGREGATION	GO_REGULATION_OF_CHROMOSOME_SEGREGATION	Details ...	78	0.605874	2.00009	0.00401606	0.01267	0.375	3150	tags=55%, list=17%, signal=66%
GO_COENZYME_METABOLIC_PROCESS	GO_COENZYME_METABOLIC_PROCESS	Details ...	248	0.510927	1.99876	0.00203666	0.0126923	0.38	4776	tags=52%, list=26%, signal=68%
GO_SPLICEOSOMAL_COMPLEX	GO_SPLICEOSOMAL_COMPLEX	Details ...	162	0.615309	1.99762	0	0.0126951	0.386	5126	tags=71%, list=27%, signal=97%
GO_4_IRON_4_SULFUR_CLUSTER_BINDING	GO_4_IRON_4_SULFUR_CLUSTER_BINDING	Details ...	40	0.620812	1.99687	0.0021097	0.0126764	0.389	3140	tags=60%, list=17%, signal=72%
GO_DNA_SYNTHESIS_INVOLVED_IN_DNA_REPAIR	GO_DNA_SYNTHESIS_INVOLVED_IN_DNA_REPAIR	Details ...	68	0.631494	1.99582	0	0.0127233	0.393	4506	tags=65%, list=24%, signal=85%
GO_RNA_SPLICING	GO_RNA_SPLICING	Details ...	346	0.566861	1.9944	0	0.0127036	0.397	5290	tags=66%, list=28%, signal=91%
GO_CELL_CYCLE_G1_S_PHASE_TRANSITION	GO_CELL_CYCLE_G1_S_PHASE_TRANSITION	Details ...	108	0.587245	1.9935	0.00204082	0.0127394	0.398	3340	tags=51%, list=18%, signal=62%
GO_RNA_MODIFICATION	GO_RNA_MODIFICATION	Details ...	106	0.597194	1.99188	0	0.0128495	0.407	4932	tags=69%, list=26%, signal=93%
GO_NUCLEOBASE_CONTAINING_COMPOUND_TRANSPORT	GO_NUCLEOBASE_CONTAINING_COMPOUND_TRANSPORT	Details ...	187	0.541853	1.99075	0	0.0128447	0.413	5011	tags=62%, list=27%, signal=84%
GO_RNA_POLYMERASE_COMPLEX	GO_RNA_POLYMERASE_COMPLEX	Details ...	118	0.564184	1.98986	0	0.0128311	0.416	5625	tags=69%, list=30%, signal=98%
GO_ENDONUCLEASE_ACTIVITY	GO_ENDONUCLEASE_ACTIVITY	Details ...	115	0.521255	1.98874	0	0.0128941	0.422	4815	tags=50%, list=26%, signal=67%
GO_MRNA_PROCESSING	GO_MRNA_PROCESSING	Details ...	405	0.543972	1.98837	0	0.0127686	0.423	5290	tags=64%, list=28%, signal=88%
GO_GENE_SILENCING	GO_GENE_SILENCING	Details ...	189	0.514916	1.98772	0	0.0127505	0.424	5674	tags=58%, list=30%, signal=83%
GO_REGULATION_OF_CYTOKINESIS	GO_REGULATION_OF_CYTOKINESIS	Details ...	58	0.543813	1.98626	0	0.0128453	0.424	2473	tags=38%, list=13%, signal=44%
GO_G1_DNA_DAMAGE_CHECKPOINT	GO_G1_DNA_DAMAGE_CHECKPOINT	Details ...	68	0.5573	1.98271	0.00201207	0.0134696	0.437	3441	tags=43%, list=18%, signal=52%
GO_COFACTOR_METABOLIC_PROCESS	GO_COFACTOR_METABOLIC_PROCESS	Details ...	317	0.504359	1.97784	0.002079	0.0141621	0.457	4423	tags=48%, list=24%, signal=61%
GO_NCRNA_PROCESSING	GO_NCRNA_PROCESSING	Details ...	361	0.619322	1.97681	0.0040404	0.014136	0.459	5738	tags=77%, list=31%, signal=109%
GO_MITOTIC_CELL_CYCLE_CHECKPOINT	GO_MITOTIC_CELL_CYCLE_CHECKPOINT	Details ...	130	0.528296	1.97611	0	0.0140725	0.46	3601	tags=45%, list=19%, signal=56%
GO_CHROMATIN_REMODELING	GO_CHROMATIN_REMODELING	Details ...	140	0.512888	1.97514	0.00194553	0.014055	0.464	4328	tags=51%, list=23%, signal=65%
GO_EXONUCLEASE_ACTIVITY_ACTIVE_WITH_EITHER_RIBO_OR_DEOXYRIBONUCLEIC_ACIDS_AND_PRODUCING_5_PHOSPHOMONOESTERS	GO_EXONUCLEASE_ACTIVITY_ACTIVE_WITH_EITHER_RIBO_OR_DEOXYRIBONUCLEIC_ACIDS_AND_PRODUCING_5_PHOSPHOMONOESTERS	Details ...	40	0.658419	1.97428	0	0.0140941	0.467	3594	tags=65%, list=19%, signal=80%
GO_SNORNA_BINDING	GO_SNORNA_BINDING	Details ...	25	0.742526	1.97292	0	0.0141684	0.471	3647	tags=80%, list=19%, signal=99%
GO_DNA_TEMPLATED_TRANSCRIPTION_TERMINATION	GO_DNA_TEMPLATED_TRANSCRIPTION_TERMINATION	Details ...	97	0.653329	1.97165	0	0.014259	0.478	4900	tags=74%, list=26%, signal=100%
GO_CYCLIN_DEPENDENT_PROTEIN_KINASE_HOLOENZYME_COMPLEX	GO_CYCLIN_DEPENDENT_PROTEIN_KINASE_HOLOENZYME_COMPLEX	Details ...	30	0.619592	1.97009	0	0.0143516	0.484	5258	tags=70%, list=28%, signal=97%
GO_DNA_DAMAGE_RESPONSE_DETECTION_OF_DNA_DAMAGE	GO_DNA_DAMAGE_RESPONSE_DETECTION_OF_DNA_DAMAGE	Details ...	36	0.691765	1.96954	0	0.0142683	0.486	4309	tags=72%, list=23%, signal=94%
GO_REGULATION_OF_TRANSCRIPTION_INVOLVED_IN_G1_S_TRANSITION_OF_MITOTIC_CELL_CYCLE	GO_REGULATION_OF_TRANSCRIPTION_INVOLVED_IN_G1_S_TRANSITION_OF_MITOTIC_CELL_CYCLE	Details ...	25	0.712827	1.96719	0.00206186	0.0145611	0.497	3340	tags=64%, list=18%, signal=78%
GO_DNA_HELICASE_ACTIVITY	GO_DNA_HELICASE_ACTIVITY	Details ...	50	0.672427	1.96645	0	0.0144816	0.499	3140	tags=62%, list=17%, signal=74%
GO_METAPHASE_PLATE_CONGRESSION	GO_METAPHASE_PLATE_CONGRESSION	Details ...	41	0.648921	1.96636	0.00403226	0.0143401	0.499	2462	tags=61%, list=13%, signal=70%
GO_RNA_LOCALIZATION	GO_RNA_LOCALIZATION	Details ...	173	0.567607	1.96619	0	0.014206	0.5	5481	tags=71%, list=29%, signal=100%
GO_ACETYLTRANSFERASE_ACTIVITY	GO_ACETYLTRANSFERASE_ACTIVITY	Details ...	92	0.517775	1.96512	0	0.0142697	0.505	5056	tags=49%, list=27%, signal=67%
GO_TERMINATION_OF_RNA_POLYMERASE_II_TRANSCRIPTION	GO_TERMINATION_OF_RNA_POLYMERASE_II_TRANSCRIPTION	Details ...	61	0.67846	1.96477	0	0.0142255	0.507	4900	tags=77%, list=26%, signal=104%
GO_METAL_CLUSTER_BINDING	GO_METAL_CLUSTER_BINDING	Details ...	60	0.602867	1.96389	0.00212766	0.0142007	0.51	3140	tags=57%, list=17%, signal=68%
GO_EXONUCLEASE_ACTIVITY	GO_EXONUCLEASE_ACTIVITY	Details ...	70	0.587034	1.96354	0.00207469	0.0141032	0.51	3843	tags=59%, list=21%, signal=73%
GO_REGULATION_OF_TELOMERE_MAINTENANCE_VIA_TELOMERE_LENGTHENING	GO_REGULATION_OF_TELOMERE_MAINTENANCE_VIA_TELOMERE_LENGTHENING	Details ...	49	0.584545	1.96346	0.00201207	0.0139706	0.511	1914	tags=43%, list=10%, signal=48%
GO_REPLICATION_FORK	GO_REPLICATION_FORK	Details ...	62	0.657997	1.96269	0.00408998	0.0139889	0.514	3583	tags=66%, list=19%, signal=82%
GO_NUCLEAR_CHROMOSOME_TELOMERIC_REGION	GO_NUCLEAR_CHROMOSOME_TELOMERIC_REGION	Details ...	122	0.546777	1.96249	0.00203252	0.0138757	0.514	4483	tags=53%, list=24%, signal=70%
GO_INTERSTRAND_CROSS_LINK_REPAIR	GO_INTERSTRAND_CROSS_LINK_REPAIR	Details ...	38	0.628074	1.96172	0.00402414	0.013861	0.518	5368	tags=74%, list=29%, signal=103%
GO_NAD_METABOLIC_PROCESS	GO_NAD_METABOLIC_PROCESS	Details ...	49	0.585884	1.96026	0.00199601	0.0140565	0.528	4314	tags=51%, list=23%, signal=66%
GO_NUCLEAR_HETEROCHROMATIN	GO_NUCLEAR_HETEROCHROMATIN	Details ...	31	0.614565	1.95961	0	0.0140563	0.53	3839	tags=48%, list=21%, signal=61%
GO_RIBONUCLEOPROTEIN_COMPLEX_BIOGENESIS	GO_RIBONUCLEOPROTEIN_COMPLEX_BIOGENESIS	Details ...	413	0.615519	1.95924	0.00409836	0.0139938	0.531	5738	tags=77%, list=31%, signal=108%
GO_MITOTIC_RECOMBINATION	GO_MITOTIC_RECOMBINATION	Details ...	41	0.714217	1.95881	0.00203666	0.0139717	0.532	3912	tags=76%, list=21%, signal=95%
GO_POSITIVE_REGULATION_OF_LIGASE_ACTIVITY	GO_POSITIVE_REGULATION_OF_LIGASE_ACTIVITY	Details ...	108	0.612119	1.95857	0	0.0138842	0.532	5212	tags=70%, list=28%, signal=97%
GO_RNA_HELICASE_ACTIVITY	GO_RNA_HELICASE_ACTIVITY	Details ...	67	0.606729	1.95701	0.00211416	0.0140732	0.539	3539	tags=54%, list=19%, signal=66%
GO_NEGATIVE_REGULATION_OF_MRNA_METABOLIC_PROCESS	GO_NEGATIVE_REGULATION_OF_MRNA_METABOLIC_PROCESS	Details ...	34	0.681688	1.95474	0	0.0143221	0.542	3664	tags=74%, list=20%, signal=91%
GO_NEGATIVE_REGULATION_OF_NUCLEAR_DIVISION	GO_NEGATIVE_REGULATION_OF_NUCLEAR_DIVISION	Details ...	43	0.590111	1.95207	0.00202429	0.0147064	0.553	2281	tags=44%, list=12%, signal=50%
GO_NUCLEAR_PORE	GO_NUCLEAR_PORE	Details ...	73	0.612121	1.95144	0.00409836	0.0147234	0.555	3469	tags=62%, list=19%, signal=75%
GO_DNA_REPLICATION_INDEPENDENT_NUCLEOSOME_ORGANIZATION	GO_DNA_REPLICATION_INDEPENDENT_NUCLEOSOME_ORGANIZATION	Details ...	48	0.665186	1.95135	0.00412371	0.0146009	0.555	3583	tags=65%, list=19%, signal=80%
GO_NUCLEAR_TRANSCRIBED_MRNA_CATABOLIC_PROCESS_DEADENYLATION_DEPENDENT_DECAY	GO_NUCLEAR_TRANSCRIBED_MRNA_CATABOLIC_PROCESS_DEADENYLATION_DEPENDENT_DECAY	Details ...	53	0.598099	1.95081	0.00204082	0.0145802	0.558	3607	tags=57%, list=19%, signal=70%
GO_RNA_METHYLTRANSFERASE_ACTIVITY	GO_RNA_METHYLTRANSFERASE_ACTIVITY	Details ...	38	0.657369	1.9477	0	0.0149851	0.569	4596	tags=68%, list=25%, signal=91%
GO_OXIDOREDUCTION_COENZYME_METABOLIC_PROCESS	GO_OXIDOREDUCTION_COENZYME_METABOLIC_PROCESS	Details ...	97	0.558229	1.94531	0.00400802	0.0154175	0.584	4713	tags=56%, list=25%, signal=74%
GO_NUCLEAR_CHROMOSOME	GO_NUCLEAR_CHROMOSOME	Details ...	495	0.471793	1.94403	0.002	0.0156034	0.591	4880	tags=48%, list=26%, signal=64%
GO_REGULATION_OF_RNA_STABILITY	GO_REGULATION_OF_RNA_STABILITY	Details ...	136	0.552983	1.94322	0.00201207	0.015628	0.598	5570	tags=69%, list=30%, signal=98%
GO_PROTEASOME_COMPLEX	GO_PROTEASOME_COMPLEX	Details ...	74	0.658162	1.94158	0	0.0157777	0.6	4098	tags=72%, list=22%, signal=91%
GO_BLASTOCYST_GROWTH	GO_BLASTOCYST_GROWTH	Details ...	15	0.741478	1.94153	0	0.0156531	0.6	2722	tags=53%, list=15%, signal=62%
GO_RNA_METHYLATION	GO_RNA_METHYLATION	Details ...	45	0.642856	1.94103	0	0.0156303	0.602	4596	tags=69%, list=25%, signal=91%
GO_DEOXYRIBONUCLEASE_ACTIVITY	GO_DEOXYRIBONUCLEASE_ACTIVITY	Details ...	63	0.570969	1.94027	0	0.0156184	0.603	4815	tags=59%, list=26%, signal=79%
GO_NON_RECOMBINATIONAL_REPAIR	GO_NON_RECOMBINATIONAL_REPAIR	Details ...	66	0.548598	1.94016	0.00603622	0.015506	0.603	4815	tags=56%, list=26%, signal=75%
GO_MISMATCH_REPAIR	GO_MISMATCH_REPAIR	Details ...	26	0.660494	1.94011	0.00398406	0.0153986	0.603	5101	tags=81%, list=27%, signal=111%
GO_REGULATION_OF_NUCLEAR_DIVISION	GO_REGULATION_OF_NUCLEAR_DIVISION	Details ...	154	0.475147	1.93992	0.00203252	0.0152884	0.603	2833	tags=39%, list=15%, signal=46%
GO_DNA_DIRECTED_RNA_POLYMERASE_II_HOLOENZYME	GO_DNA_DIRECTED_RNA_POLYMERASE_II_HOLOENZYME	Details ...	93	0.544988	1.93975	0	0.0151795	0.603	5625	tags=66%, list=30%, signal=93%
GO_NUCLEOTIDE_EXCISION_REPAIR	GO_NUCLEOTIDE_EXCISION_REPAIR	Details ...	111	0.573242	1.93923	0	0.0151649	0.606	5295	tags=65%, list=28%, signal=90%
GO_NIK_NF_KAPPAB_SIGNALING	GO_NIK_NF_KAPPAB_SIGNALING	Details ...	83	0.60807	1.93876	0.00206612	0.0151456	0.608	4464	tags=61%, list=24%, signal=80%
GO_MONOSACCHARIDE_CATABOLIC_PROCESS	GO_MONOSACCHARIDE_CATABOLIC_PROCESS	Details ...	54	0.579785	1.93712	0.002079	0.015357	0.614	4314	tags=54%, list=23%, signal=70%
GO_MACROMOLECULAR_COMPLEX_DISASSEMBLY	GO_MACROMOLECULAR_COMPLEX_DISASSEMBLY	Details ...	176	0.555966	1.93673	0.002079	0.0153377	0.614	4066	tags=59%, list=22%, signal=75%
GO_PYRIMIDINE_NUCLEOBASE_METABOLIC_PROCESS	GO_PYRIMIDINE_NUCLEOBASE_METABOLIC_PROCESS	Details ...	19	0.645922	1.93654	0.00200803	0.0152275	0.614	1482	tags=42%, list=8%, signal=46%
GO_CELL_CYCLE_PHASE_TRANSITION	GO_CELL_CYCLE_PHASE_TRANSITION	Details ...	248	0.517825	1.93334	0.00612245	0.01571	0.623	4751	tags=54%, list=25%, signal=72%
GO_REGULATION_OF_LIGASE_ACTIVITY	GO_REGULATION_OF_LIGASE_ACTIVITY	Details ...	128	0.573428	1.93281	0	0.0156949	0.623	5290	tags=68%, list=28%, signal=94%
GO_PYRIMIDINE_NUCLEOTIDE_METABOLIC_PROCESS	GO_PYRIMIDINE_NUCLEOTIDE_METABOLIC_PROCESS	Details ...	43	0.576872	1.93178	0.00204082	0.0157891	0.627	4208	tags=53%, list=22%, signal=69%
GO_RNA_PHOSPHODIESTER_BOND_HYDROLYSIS_EXONUCLEOLYTIC	GO_RNA_PHOSPHODIESTER_BOND_HYDROLYSIS_EXONUCLEOLYTIC	Details ...	33	0.664722	1.93059	0	0.0158953	0.634	3714	tags=70%, list=20%, signal=87%
GO_MRNA_CLEAVAGE	GO_MRNA_CLEAVAGE	Details ...	17	0.718545	1.92978	0	0.0159004	0.638	3998	tags=71%, list=21%, signal=90%
GO_NUCLEOBASE_BIOSYNTHETIC_PROCESS	GO_NUCLEOBASE_BIOSYNTHETIC_PROCESS	Details ...	17	0.732244	1.92932	0.00402414	0.01587	0.639	3423	tags=71%, list=18%, signal=86%
GO_FOLIC_ACID_CONTAINING_COMPOUND_METABOLIC_PROCESS	GO_FOLIC_ACID_CONTAINING_COMPOUND_METABOLIC_PROCESS	Details ...	27	0.661657	1.92878	0.00205761	0.0158426	0.641	1706	tags=48%, list=9%, signal=53%
GO_REGULATION_OF_TELOMERE_MAINTENANCE	GO_REGULATION_OF_TELOMERE_MAINTENANCE	Details ...	64	0.54519	1.92777	0.00200401	0.0159473	0.646	4820	tags=56%, list=26%, signal=76%
GO_RIBONUCLEASE_ACTIVITY	GO_RIBONUCLEASE_ACTIVITY	Details ...	86	0.541588	1.92607	0	0.0161598	0.651	5589	tags=60%, list=30%, signal=86%
GO_DNA_LIGATION	GO_DNA_LIGATION	Details ...	16	0.727606	1.92415	0	0.0164423	0.659	4053	tags=81%, list=22%, signal=104%
GO_PROTEIN_SUMOYLATION	GO_PROTEIN_SUMOYLATION	Details ...	112	0.544744	1.92393	0.004	0.0163777	0.659	4997	tags=58%, list=27%, signal=79%
GO_PROTEIN_LOCALIZATION_TO_CHROMOSOME	GO_PROTEIN_LOCALIZATION_TO_CHROMOSOME	Details ...	38	0.620503	1.9218	0.00210084	0.016687	0.664	2922	tags=55%, list=16%, signal=65%
GO_SMALL_NUCLEAR_RIBONUCLEOPROTEIN_COMPLEX	GO_SMALL_NUCLEAR_RIBONUCLEOPROTEIN_COMPLEX	Details ...	59	0.646362	1.9216	0	0.0166172	0.665	4900	tags=78%, list=26%, signal=105%
GO_REGULATION_OF_MITOTIC_CELL_CYCLE	GO_REGULATION_OF_MITOTIC_CELL_CYCLE	Details ...	446	0.437106	1.92136	0.00203666	0.0165874	0.666	3826	tags=43%, list=20%, signal=53%
GO_RNA_POLYMERASE_ACTIVITY	GO_RNA_POLYMERASE_ACTIVITY	Details ...	43	0.623916	1.92122	0.0041841	0.0164997	0.666	5526	tags=77%, list=30%, signal=109%
GO_TETRAHYDROFOLATE_METABOLIC_PROCESS	GO_TETRAHYDROFOLATE_METABOLIC_PROCESS	Details ...	19	0.719054	1.91995	0	0.0166024	0.668	1706	tags=58%, list=9%, signal=64%
GO_PIGMENT_BIOSYNTHETIC_PROCESS	GO_PIGMENT_BIOSYNTHETIC_PROCESS	Details ...	46	0.555666	1.91751	0	0.0170958	0.675	2386	tags=41%, list=13%, signal=47%
GO_90S_PRERIBOSOME	GO_90S_PRERIBOSOME	Details ...	23	0.785851	1.91675	0	0.0171247	0.679	3182	tags=87%, list=17%, signal=105%
GO_REGULATION_OF_PROTEIN_UBIQUITINATION_INVOLVED_IN_UBIQUITIN_DEPENDENT_PROTEIN_CATABOLIC_PROCESS	GO_REGULATION_OF_PROTEIN_UBIQUITINATION_INVOLVED_IN_UBIQUITIN_DEPENDENT_PROTEIN_CATABOLIC_PROCESS	Details ...	102	0.5975	1.91474	0	0.0174742	0.69	3697	tags=59%, list=20%, signal=73%
GO_ATP_DEPENDENT_DNA_HELICASE_ACTIVITY	GO_ATP_DEPENDENT_DNA_HELICASE_ACTIVITY	Details ...	32	0.675131	1.91418	0	0.0175232	0.694	3140	tags=63%, list=17%, signal=75%
GO_REGULATION_OF_TRANSLATIONAL_INITIATION	GO_REGULATION_OF_TRANSLATIONAL_INITIATION	Details ...	80	0.552191	1.91084	0.00618557	0.0181126	0.71	5716	tags=63%, list=31%, signal=90%
GO_SPINDLE_CHECKPOINT	GO_SPINDLE_CHECKPOINT	Details ...	23	0.696259	1.90949	0.0020284	0.0182604	0.714	1860	tags=57%, list=10%, signal=63%
GO_SPINDLE	GO_SPINDLE	Details ...	271	0.471485	1.9089	0.00613497	0.0182813	0.715	4756	tags=52%, list=25%, signal=68%
GO_U12_TYPE_SPLICEOSOMAL_COMPLEX	GO_U12_TYPE_SPLICEOSOMAL_COMPLEX	Details ...	25	0.721776	1.90782	0	0.0183988	0.719	3897	tags=68%, list=21%, signal=86%
GO_POSTREPLICATION_REPAIR	GO_POSTREPLICATION_REPAIR	Details ...	48	0.607259	1.90647	0.00410678	0.0185576	0.725	5101	tags=65%, list=27%, signal=89%
GO_NEGATIVE_REGULATION_OF_CHROMOSOME_SEGREGATION	GO_NEGATIVE_REGULATION_OF_CHROMOSOME_SEGREGATION	Details ...	25	0.664798	1.9052	0.002079	0.0187398	0.729	1860	tags=52%, list=10%, signal=58%
GO_REGULATION_OF_CELL_CYCLE_PHASE_TRANSITION	GO_REGULATION_OF_CELL_CYCLE_PHASE_TRANSITION	Details ...	309	0.459111	1.90517	0.00206186	0.0186227	0.729	3826	tags=46%, list=20%, signal=57%
GO_MEMBRANE_DISASSEMBLY	GO_MEMBRANE_DISASSEMBLY	Details ...	44	0.638056	1.90506	0.0102881	0.0185466	0.729	3393	tags=66%, list=18%, signal=80%
GO_TRANSCRIPTION_ELONGATION_FROM_RNA_POLYMERASE_II_PROMOTER	GO_TRANSCRIPTION_ELONGATION_FROM_RNA_POLYMERASE_II_PROMOTER	Details ...	71	0.580775	1.90387	0	0.0186807	0.731	5575	tags=70%, list=30%, signal=100%
GO_HISTONE_METHYLTRANSFERASE_COMPLEX	GO_HISTONE_METHYLTRANSFERASE_COMPLEX	Details ...	64	0.551247	1.90255	0.0020284	0.0189153	0.738	3670	tags=50%, list=20%, signal=62%
GO_INO80_TYPE_COMPLEX	GO_INO80_TYPE_COMPLEX	Details ...	21	0.667594	1.90189	0.008	0.0189056	0.742	4880	tags=81%, list=26%, signal=109%
GO_NUCLEOSOME_BINDING	GO_NUCLEOSOME_BINDING	Details ...	44	0.618175	1.90118	0.00793651	0.0189411	0.744	5425	tags=68%, list=29%, signal=96%
GO_MULTI_ORGANISM_LOCALIZATION	GO_MULTI_ORGANISM_LOCALIZATION	Details ...	65	0.590222	1.90115	0.00420168	0.0188394	0.745	4997	tags=68%, list=27%, signal=92%
GO_N_ACETYLTRANSFERASE_ACTIVITY	GO_N_ACETYLTRANSFERASE_ACTIVITY	Details ...	77	0.509227	1.90089	0	0.0187843	0.745	5056	tags=48%, list=27%, signal=66%
GO_MITOCHONDRIAL_MATRIX	GO_MITOCHONDRIAL_MATRIX	Details ...	386	0.553798	1.9003	0.00420168	0.0188159	0.747	4066	tags=56%, list=22%, signal=71%
GO_DNA_DEPENDENT_ATPASE_ACTIVITY	GO_DNA_DEPENDENT_ATPASE_ACTIVITY	Details ...	77	0.610962	1.89971	0.00204918	0.018853	0.749	4092	tags=61%, list=22%, signal=78%
GO_REGULATION_OF_GENE_EXPRESSION_EPIGENETIC	GO_REGULATION_OF_GENE_EXPRESSION_EPIGENETIC	Details ...	210	0.478222	1.89947	0	0.0188051	0.749	5674	tags=55%, list=30%, signal=78%
GO_NUCLEOBASE_CONTAINING_SMALL_MOLECULE_INTERCONVERSION	GO_NUCLEOBASE_CONTAINING_SMALL_MOLECULE_INTERCONVERSION	Details ...	21	0.670987	1.89899	0.00608519	0.0187926	0.749	2050	tags=52%, list=11%, signal=59%
GO_NUCLEUS_ORGANIZATION	GO_NUCLEUS_ORGANIZATION	Details ...	125	0.487964	1.8982	0.00408998	0.0188188	0.752	5497	tags=62%, list=29%, signal=87%
GO_SINGLE_STRANDED_DNA_BINDING	GO_SINGLE_STRANDED_DNA_BINDING	Details ...	78	0.573209	1.89803	0.00204082	0.0187524	0.753	2380	tags=47%, list=13%, signal=54%
GO_TRANSLESION_SYNTHESIS	GO_TRANSLESION_SYNTHESIS	Details ...	36	0.612833	1.89784	0	0.0186879	0.755	5101	tags=67%, list=27%, signal=91%
GO_PRONUCLEUS	GO_PRONUCLEUS	Details ...	15	0.777954	1.89714	0	0.0187074	0.756	2817	tags=80%, list=15%, signal=94%
GO_HEAT_SHOCK_PROTEIN_BINDING	GO_HEAT_SHOCK_PROTEIN_BINDING	Details ...	87	0.511463	1.89674	0.00207039	0.0186669	0.758	5240	tags=60%, list=28%, signal=83%
GO_PYRIDINE_CONTAINING_COMPOUND_BIOSYNTHETIC_PROCESS	GO_PYRIDINE_CONTAINING_COMPOUND_BIOSYNTHETIC_PROCESS	Details ...	18	0.642158	1.89609	0.00196464	0.0187406	0.759	2849	tags=44%, list=15%, signal=52%
GO_REGULATION_OF_SIGNAL_TRANSDUCTION_BY_P53_CLASS_MEDIATOR	GO_REGULATION_OF_SIGNAL_TRANSDUCTION_BY_P53_CLASS_MEDIATOR	Details ...	157	0.473778	1.89557	0.00200803	0.0187524	0.762	5585	tags=58%, list=30%, signal=82%
GO_PORPHYRIN_CONTAINING_COMPOUND_METABOLIC_PROCESS	GO_PORPHYRIN_CONTAINING_COMPOUND_METABOLIC_PROCESS	Details ...	36	0.591281	1.89441	0.00819672	0.0188737	0.765	2386	tags=39%, list=13%, signal=44%
GO_TRANSFERASE_ACTIVITY_TRANSFERRING_ACYL_GROUPS_OTHER_THAN_AMINO_ACYL_GROUPS	GO_TRANSFERASE_ACTIVITY_TRANSFERRING_ACYL_GROUPS_OTHER_THAN_AMINO_ACYL_GROUPS	Details ...	197	0.442694	1.89324	0	0.0190567	0.767	5056	tags=44%, list=27%, signal=59%
GO_TRNA_TRANSPORT	GO_TRNA_TRANSPORT	Details ...	32	0.716768	1.89245	0.00618557	0.0191501	0.772	4997	tags=91%, list=27%, signal=123%
GO_HETEROCHROMATIN	GO_HETEROCHROMATIN	Details ...	65	0.531282	1.89154	0.00203252	0.0192676	0.776	3903	tags=48%, list=21%, signal=60%
GO_ANAPHASE_PROMOTING_COMPLEX_DEPENDENT_CATABOLIC_PROCESS	GO_ANAPHASE_PROMOTING_COMPLEX_DEPENDENT_CATABOLIC_PROCESS	Details ...	76	0.687813	1.89065	0	0.0193712	0.779	4342	tags=79%, list=23%, signal=102%
GO_TRNA_BINDING	GO_TRNA_BINDING	Details ...	43	0.636957	1.89035	0.00421053	0.0193151	0.78	5718	tags=81%, list=31%, signal=117%
GO_TRNA_MODIFICATION	GO_TRNA_MODIFICATION	Details ...	53	0.64224	1.89002	0	0.0193221	0.781	5775	tags=83%, list=31%, signal=120%
GO_POSITIVE_REGULATION_OF_CHROMOSOME_SEGREGATION	GO_POSITIVE_REGULATION_OF_CHROMOSOME_SEGREGATION	Details ...	23	0.680221	1.88995	0.00200803	0.0192264	0.781	2833	tags=57%, list=15%, signal=67%
GO_CONDENSED_NUCLEAR_CHROMOSOME	GO_CONDENSED_NUCLEAR_CHROMOSOME	Details ...	75	0.552227	1.88946	0.00402414	0.0192198	0.784	3815	tags=48%, list=20%, signal=60%
GO_REGULATION_OF_MRNA_METABOLIC_PROCESS	GO_REGULATION_OF_MRNA_METABOLIC_PROCESS	Details ...	114	0.526142	1.88919	0.00204918	0.0191851	0.784	5570	tags=67%, list=30%, signal=94%
GO_ENDONUCLEASE_ACTIVITY_ACTIVE_WITH_EITHER_RIBO_OR_DEOXYRIBONUCLEIC_ACIDS_AND_PRODUCING_5_PHOSPHOMONOESTERS	GO_ENDONUCLEASE_ACTIVITY_ACTIVE_WITH_EITHER_RIBO_OR_DEOXYRIBONUCLEIC_ACIDS_AND_PRODUCING_5_PHOSPHOMONOESTERS	Details ...	34	0.621851	1.88789	0	0.0194792	0.788	4815	tags=65%, list=26%, signal=87%
GO_PYRIMIDINE_CONTAINING_COMPOUND_BIOSYNTHETIC_PROCESS	GO_PYRIMIDINE_CONTAINING_COMPOUND_BIOSYNTHETIC_PROCESS	Details ...	37	0.572203	1.88641	0.00209644	0.0196914	0.793	4203	tags=54%, list=22%, signal=70%
GO_DNA_CATABOLIC_PROCESS	GO_DNA_CATABOLIC_PROCESS	Details ...	27	0.586371	1.88607	0	0.0196799	0.795	3047	tags=44%, list=16%, signal=53%
GO_DNA_STRAND_ELONGATION_INVOLVED_IN_DNA_REPLICATION	GO_DNA_STRAND_ELONGATION_INVOLVED_IN_DNA_REPLICATION	Details ...	25	0.729722	1.88553	0.00806452	0.0196797	0.796	4844	tags=92%, list=26%, signal=124%
GO_ENDORIBONUCLEASE_COMPLEX	GO_ENDORIBONUCLEASE_COMPLEX	Details ...	17	0.704174	1.88539	0.00400802	0.019599	0.797	3998	tags=71%, list=21%, signal=90%
GO_NUCLEOTIDE_EXCISION_REPAIR_DNA_INCISION	GO_NUCLEOTIDE_EXCISION_REPAIR_DNA_INCISION	Details ...	39	0.618116	1.88479	0.00207469	0.0196467	0.797	4528	tags=64%, list=24%, signal=84%
GO_SNRNA_PROCESSING	GO_SNRNA_PROCESSING	Details ...	20	0.711542	1.88446	0.00200401	0.0196013	0.798	5410	tags=100%, list=29%, signal=141%
GO_NUCLEOSIDE_MONOPHOSPHATE_BIOSYNTHETIC_PROCESS	GO_NUCLEOSIDE_MONOPHOSPHATE_BIOSYNTHETIC_PROCESS	Details ...	78	0.577276	1.88394	0.00414079	0.0196239	0.8	5400	tags=67%, list=29%, signal=93%
GO_ATPASE_ACTIVITY	GO_ATPASE_ACTIVITY	Details ...	415	0.432972	1.88353	0	0.0196214	0.801	4178	tags=43%, list=22%, signal=55%
GO_NEGATIVE_REGULATION_OF_CELL_CYCLE_PROCESS	GO_NEGATIVE_REGULATION_OF_CELL_CYCLE_PROCESS	Details ...	200	0.445373	1.88316	0.002	0.0195984	0.801	3453	tags=40%, list=18%, signal=48%
GO_NF_KAPPAB_BINDING	GO_NF_KAPPAB_BINDING	Details ...	30	0.605782	1.88203	0.00411523	0.019766	0.801	4722	tags=63%, list=25%, signal=85%
GO_RNA_PHOSPHODIESTER_BOND_HYDROLYSIS_ENDONUCLEOLYTIC	GO_RNA_PHOSPHODIESTER_BOND_HYDROLYSIS_ENDONUCLEOLYTIC	Details ...	54	0.575633	1.88181	0	0.019699	0.801	5649	tags=63%, list=30%, signal=90%
GO_DNA_TEMPLATED_TRANSCRIPTION_ELONGATION	GO_DNA_TEMPLATED_TRANSCRIPTION_ELONGATION		86	0.564347	1.88018	0	0.0199617	0.804	5575	tags=70%, list=30%, signal=99%
GO_RIBOSOME_BINDING	GO_RIBOSOME_BINDING		43	0.566535	1.87932	0.0021097	0.0200702	0.806	4225	tags=60%, list=23%, signal=78%
GO_NADH_METABOLIC_PROCESS	GO_NADH_METABOLIC_PROCESS		33	0.635812	1.87876	0.00404858	0.0200875	0.809	4314	tags=58%, list=23%, signal=75%
GO_RIBOSOME_BIOGENESIS	GO_RIBOSOME_BIOGENESIS		291	0.622132	1.87787	0.0102041	0.0201619	0.812	5775	tags=79%, list=31%, signal=113%
GO_DNA_CATABOLIC_PROCESS_ENDONUCLEOLYTIC	GO_DNA_CATABOLIC_PROCESS_ENDONUCLEOLYTIC		19	0.618987	1.87744	0	0.0201519	0.812	2487	tags=42%, list=13%, signal=49%
GO_CATALYTIC_STEP_2_SPLICEOSOME	GO_CATALYTIC_STEP_2_SPLICEOSOME		84	0.621877	1.87738	0	0.0200614	0.812	5107	tags=76%, list=27%, signal=104%
GO_POSITIVE_REGULATION_OF_TELOMERE_MAINTENANCE_VIA_TELOMERE_LENGTHENING	GO_POSITIVE_REGULATION_OF_TELOMERE_MAINTENANCE_VIA_TELOMERE_LENGTHENING		32	0.608553	1.87684	0.00824742	0.0201256	0.813	4753	tags=63%, list=25%, signal=84%
GO_NEGATIVE_REGULATION_OF_MRNA_SPLICING_VIA_SPLICEOSOME	GO_NEGATIVE_REGULATION_OF_MRNA_SPLICING_VIA_SPLICEOSOME		19	0.736301	1.87674	0	0.0200579	0.813	3372	tags=79%, list=18%, signal=96%
GO_DNA_PACKAGING	GO_DNA_PACKAGING		173	0.538738	1.87611	0.00409836	0.0200975	0.815	4328	tags=54%, list=23%, signal=69%
GO_N_ACYLTRANSFERASE_ACTIVITY	GO_N_ACYLTRANSFERASE_ACTIVITY		94	0.469535	1.87493	0.00197239	0.0203287	0.821	5056	tags=44%, list=27%, signal=59%
GO_CELLULAR_COMPONENT_DISASSEMBLY_INVOLVED_IN_EXECUTION_PHASE_OF_APOPTOSIS	GO_CELLULAR_COMPONENT_DISASSEMBLY_INVOLVED_IN_EXECUTION_PHASE_OF_APOPTOSIS		41	0.556897	1.87464	0.00199203	0.0202925	0.822	4386	tags=61%, list=23%, signal=79%
GO_REGULATION_OF_DNA_DEPENDENT_DNA_REPLICATION	GO_REGULATION_OF_DNA_DEPENDENT_DNA_REPLICATION		39	0.614746	1.87448	0.00606061	0.0202252	0.822	4440	tags=69%, list=24%, signal=91%
GO_EXECUTION_PHASE_OF_APOPTOSIS	GO_EXECUTION_PHASE_OF_APOPTOSIS		53	0.521937	1.87434	0.0020202	0.0201563	0.822	4386	tags=55%, list=23%, signal=71%
GO_ENDODEOXYRIBONUCLEASE_ACTIVITY	GO_ENDODEOXYRIBONUCLEASE_ACTIVITY		48	0.56401	1.87019	0.0020284	0.0210232	0.83	4815	tags=58%, list=26%, signal=78%
GO_3_5_EXONUCLEASE_ACTIVITY	GO_3_5_EXONUCLEASE_ACTIVITY		44	0.581235	1.86852	0.006	0.0213435	0.832	3714	tags=59%, list=20%, signal=74%
GO_REGULATION_OF_CENTROSOME_DUPLICATION	GO_REGULATION_OF_CENTROSOME_DUPLICATION		31	0.619428	1.86445	0.00618557	0.0222415	0.839	5148	tags=65%, list=28%, signal=89%
GO_POSITIVE_REGULATION_OF_GENE_EXPRESSION_EPIGENETIC	GO_POSITIVE_REGULATION_OF_GENE_EXPRESSION_EPIGENETIC		77	0.536646	1.86444	0	0.022146	0.839	5657	tags=62%, list=30%, signal=89%
GO_DEOXYRIBONUCLEOTIDE_METABOLIC_PROCESS	GO_DEOXYRIBONUCLEOTIDE_METABOLIC_PROCESS		33	0.622387	1.8638	0.00417537	0.0222329	0.843	4208	tags=61%, list=22%, signal=78%
GO_NEGATIVE_REGULATION_OF_CELL_CYCLE_PHASE_TRANSITION	GO_NEGATIVE_REGULATION_OF_CELL_CYCLE_PHASE_TRANSITION		137	0.458847	1.86235	0.00400802	0.0224469	0.844	3453	tags=42%, list=18%, signal=51%
GO_NEGATIVE_REGULATION_OF_PROTEIN_MODIFICATION_BY_SMALL_PROTEIN_CONJUGATION_OR_REMOVAL	GO_NEGATIVE_REGULATION_OF_PROTEIN_MODIFICATION_BY_SMALL_PROTEIN_CONJUGATION_OR_REMOVAL		135	0.531601	1.86217	0	0.0224054	0.844	4347	tags=57%, list=23%, signal=74%
GO_REGULATION_OF_MRNA_SPLICING_VIA_SPLICEOSOME	GO_REGULATION_OF_MRNA_SPLICING_VIA_SPLICEOSOME		60	0.562987	1.86022	0.00396825	0.0228375	0.849	5249	tags=67%, list=28%, signal=92%
GO_NUCLEAR_REPLICATION_FORK	GO_NUCLEAR_REPLICATION_FORK		39	0.635266	1.85978	0.00831601	0.0228315	0.849	5101	tags=74%, list=27%, signal=102%
GO_DNA_STRAND_ELONGATION	GO_DNA_STRAND_ELONGATION		29	0.710749	1.85957	0.00623701	0.0227786	0.849	4053	tags=79%, list=22%, signal=101%
GO_LIGASE_ACTIVITY_FORMING_CARBON_OXYGEN_BONDS	GO_LIGASE_ACTIVITY_FORMING_CARBON_OXYGEN_BONDS		44	0.670647	1.85922	0.00617284	0.0227592	0.85	5178	tags=86%, list=28%, signal=119%
GO_GLYCOSYL_COMPOUND_BIOSYNTHETIC_PROCESS	GO_GLYCOSYL_COMPOUND_BIOSYNTHETIC_PROCESS		108	0.522923	1.85886	0.00204499	0.0227573	0.851	6005	tags=63%, list=32%, signal=92%
GO_PRERIBOSOME	GO_PRERIBOSOME		58	0.692666	1.85849	0	0.0227389	0.851	4408	tags=81%, list=24%, signal=106%
GO_NUCLEAR_TRANSCRIBED_MRNA_CATABOLIC_PROCESS_EXONUCLEOLYTIC	GO_NUCLEAR_TRANSCRIBED_MRNA_CATABOLIC_PROCESS_EXONUCLEOLYTIC		30	0.677393	1.85804	0.00623701	0.0227885	0.853	3607	tags=70%, list=19%, signal=87%
GO_AMINO_ACID_ACTIVATION	GO_AMINO_ACID_ACTIVATION		51	0.672149	1.85587	0.00626305	0.0232368	0.858	5178	tags=86%, list=28%, signal=119%
GO_AMIDE_BIOSYNTHETIC_PROCESS	GO_AMIDE_BIOSYNTHETIC_PROCESS		485	0.530083	1.85466	0.0161943	0.0234514	0.858	5653	tags=66%, list=30%, signal=92%
GO_GLUCOSE_CATABOLIC_PROCESS	GO_GLUCOSE_CATABOLIC_PROCESS		27	0.62415	1.85462	0.00609756	0.0233629	0.858	4314	tags=48%, list=23%, signal=62%
GO_TRANSCRIPTION_COUPLED_NUCLEOTIDE_EXCISION_REPAIR	GO_TRANSCRIPTION_COUPLED_NUCLEOTIDE_EXCISION_REPAIR		72	0.586363	1.85453	0.00404858	0.0232792	0.858	4641	tags=63%, list=25%, signal=83%
GO_REGULATION_OF_SISTER_CHROMATID_SEGREGATION	GO_REGULATION_OF_SISTER_CHROMATID_SEGREGATION		61	0.577304	1.85449	0.00618557	0.0231894	0.858	3150	tags=54%, list=17%, signal=65%
GO_MITOCHONDRIAL_RNA_METABOLIC_PROCESS	GO_MITOCHONDRIAL_RNA_METABOLIC_PROCESS		23	0.741647	1.85125	0	0.0238874	0.865	2046	tags=74%, list=11%, signal=83%
GO_REGULATION_OF_CHROMOSOME_ORGANIZATION	GO_REGULATION_OF_CHROMOSOME_ORGANIZATION		264	0.440449	1.84975	0.00395257	0.0241525	0.869	4820	tags=49%, list=26%, signal=65%
GO_NEGATIVE_REGULATION_OF_CHROMOSOME_ORGANIZATION	GO_NEGATIVE_REGULATION_OF_CHROMOSOME_ORGANIZATION		94	0.499163	1.8477	0.016	0.0246291	0.873	2865	tags=40%, list=15%, signal=47%
GO_TRANSFERASE_ACTIVITY_TRANSFERRING_ACYL_GROUPS	GO_TRANSFERASE_ACTIVITY_TRANSFERRING_ACYL_GROUPS		231	0.420511	1.84686	0	0.0247716	0.876	5056	tags=41%, list=27%, signal=56%
GO_PYRIMIDINE_NUCLEOSIDE_BIOSYNTHETIC_PROCESS	GO_PYRIMIDINE_NUCLEOSIDE_BIOSYNTHETIC_PROCESS		27	0.596529	1.84375	0.00207469	0.0254203	0.88	2010	tags=44%, list=11%, signal=50%
GO_REPLISOME	GO_REPLISOME		29	0.63689	1.8432	0.00809717	0.025459	0.882	3453	tags=59%, list=18%, signal=72%
GO_REGULATION_OF_RNA_SPLICING	GO_REGULATION_OF_RNA_SPLICING		92	0.508507	1.84033	0.0059761	0.0260495	0.886	5249	tags=58%, list=28%, signal=80%
GO_ACTIVATION_OF_NF_KAPPAB_INDUCING_KINASE_ACTIVITY	GO_ACTIVATION_OF_NF_KAPPAB_INDUCING_KINASE_ACTIVITY		17	0.631082	1.83617	0.00205339	0.0271832	0.89	964	tags=35%, list=5%, signal=37%
GO_SPINDLE_POLE	GO_SPINDLE_POLE		115	0.495344	1.83547	0.012024	0.0272206	0.892	4732	tags=53%, list=25%, signal=71%
GO_NEGATIVE_REGULATION_OF_CELLULAR_PROTEIN_CATABOLIC_PROCESS	GO_NEGATIVE_REGULATION_OF_CELLULAR_PROTEIN_CATABOLIC_PROCESS		60	0.524592	1.83427	0.00211864	0.0274656	0.895	4347	tags=52%, list=23%, signal=67%
GO_SPLICEOSOMAL_COMPLEX_ASSEMBLY	GO_SPLICEOSOMAL_COMPLEX_ASSEMBLY		52	0.615548	1.8333	0.0121457	0.0276505	0.896	4900	tags=69%, list=26%, signal=94%
GO_CELLULAR_MODIFIED_AMINO_ACID_BIOSYNTHETIC_PROCESS	GO_CELLULAR_MODIFIED_AMINO_ACID_BIOSYNTHETIC_PROCESS		50	0.557757	1.83212	0.00851064	0.0278872	0.899	3233	tags=44%, list=17%, signal=53%
GO_POSITIVE_REGULATION_OF_PROTEIN_MODIFICATION_BY_SMALL_PROTEIN_CONJUGATION_OR_REMOVAL	GO_POSITIVE_REGULATION_OF_PROTEIN_MODIFICATION_BY_SMALL_PROTEIN_CONJUGATION_OR_REMOVAL		187	0.475936	1.83119	0.0060241	0.028022	0.903	4342	tags=51%, list=23%, signal=66%
GO_NUCLEOSIDE_DIPHOSPHATE_METABOLIC_PROCESS	GO_NUCLEOSIDE_DIPHOSPHATE_METABOLIC_PROCESS		79	0.470443	1.82824	0.00204082	0.028817	0.906	3457	tags=39%, list=18%, signal=48%
GO_NUCLEOLAR_PART	GO_NUCLEOLAR_PART		59	0.648728	1.82812	0.00625	0.0287529	0.907	4932	tags=78%, list=26%, signal=106%
GO_MITOCHONDRIAL_MEMBRANE_ORGANIZATION	GO_MITOCHONDRIAL_MEMBRANE_ORGANIZATION		90	0.512416	1.82724	0.00203252	0.0288747	0.908	5979	tags=64%, list=32%, signal=94%
GO_DNA_N_GLYCOSYLASE_ACTIVITY	GO_DNA_N_GLYCOSYLASE_ACTIVITY		15	0.707168	1.82709	0.00824742	0.0288061	0.908	4208	tags=73%, list=22%, signal=95%
GO_NUCLEOTIDE_EXCISION_REPAIR_DNA_GAP_FILLING	GO_NUCLEOTIDE_EXCISION_REPAIR_DNA_GAP_FILLING		24	0.669563	1.82616	0.00829876	0.0290131	0.909	4309	tags=75%, list=23%, signal=97%
GO_DNA_DIRECTED_DNA_POLYMERASE_ACTIVITY	GO_DNA_DIRECTED_DNA_POLYMERASE_ACTIVITY		26	0.584398	1.82555	0.010101	0.0290737	0.909	3686	tags=58%, list=20%, signal=72%
GO_POSTTRANSCRIPTIONAL_REGULATION_OF_GENE_EXPRESSION	GO_POSTTRANSCRIPTIONAL_REGULATION_OF_GENE_EXPRESSION		421	0.440681	1.82442	0.00414079	0.0293324	0.911	5725	tags=56%, list=31%, signal=79%
GO_AEROBIC_RESPIRATION	GO_AEROBIC_RESPIRATION		49	0.64991	1.82433	0.0122699	0.0292476	0.912	5074	tags=78%, list=27%, signal=106%
GO_HEXOSE_CATABOLIC_PROCESS	GO_HEXOSE_CATABOLIC_PROCESS		45	0.543096	1.82396	0.00816326	0.029249	0.912	4314	tags=47%, list=23%, signal=61%
GO_TELOMERIC_DNA_BINDING	GO_TELOMERIC_DNA_BINDING		28	0.590952	1.82396	0.0102041	0.0291343	0.912	1914	tags=43%, list=10%, signal=48%
GO_RRNA_METABOLIC_PROCESS	GO_RRNA_METABOLIC_PROCESS		243	0.609832	1.82307	0.0221774	0.0293179	0.915	5775	tags=78%, list=31%, signal=111%
GO_EXOSOME_RNASE_COMPLEX_	GO_EXOSOME_RNASE_COMPLEX_		21	0.681004	1.82184	0.00407332	0.0295815	0.915	3594	tags=71%, list=19%, signal=88%
GO_PSEUDOURIDINE_SYNTHESIS	GO_PSEUDOURIDINE_SYNTHESIS		17	0.768135	1.82161	0.00208768	0.0295365	0.916	2480	tags=76%, list=13%, signal=88%
GO_PEPTIDYL_LYSINE_MODIFICATION	GO_PEPTIDYL_LYSINE_MODIFICATION		279	0.450061	1.82062	0.00795229	0.0296906	0.918	5585	tags=52%, list=30%, signal=73%
GO_ORGANELLE_INNER_MEMBRANE	GO_ORGANELLE_INNER_MEMBRANE		488	0.521652	1.8202	0.0102459	0.0297239	0.919	5406	tags=63%, list=29%, signal=86%
GO_PYRIMIDINE_RIBONUCLEOTIDE_METABOLIC_PROCESS	GO_PYRIMIDINE_RIBONUCLEOTIDE_METABOLIC_PROCESS		22	0.577898	1.81982	0.00411523	0.029729	0.92	2010	tags=41%, list=11%, signal=46%
GO_NEGATIVE_REGULATION_OF_MITOTIC_CELL_CYCLE	GO_NEGATIVE_REGULATION_OF_MITOTIC_CELL_CYCLE		185	0.440153	1.81813	0	0.0301019	0.922	3601	tags=42%, list=19%, signal=51%
GO_STRUCTURE_SPECIFIC_DNA_BINDING	GO_STRUCTURE_SPECIFIC_DNA_BINDING		116	0.481026	1.81763	0.00607287	0.0301584	0.922	4933	tags=47%, list=26%, signal=63%
GO_RAN_GTPASE_BINDING	GO_RAN_GTPASE_BINDING		31	0.619176	1.81756	0.0160643	0.0300809	0.922	5232	tags=77%, list=28%, signal=107%
GO_ACID_AMINO_ACID_LIGASE_ACTIVITY	GO_ACID_AMINO_ACID_LIGASE_ACTIVITY		19	0.577671	1.81668	0.00403226	0.0302532	0.924	2666	tags=47%, list=14%, signal=55%
GO_PRE_MRNA_BINDING	GO_PRE_MRNA_BINDING		24	0.648064	1.81619	0.00204918	0.0303122	0.925	4850	tags=71%, list=26%, signal=95%
GO_POSITIVE_REGULATION_OF_CHROMOSOME_ORGANIZATION	GO_POSITIVE_REGULATION_OF_CHROMOSOME_ORGANIZATION		141	0.439293	1.81574	0.00585938	0.0303358	0.926	4815	tags=50%, list=26%, signal=66%
GO_ADP_METABOLIC_PROCESS	GO_ADP_METABOLIC_PROCESS		44	0.547352	1.81556	0.00803213	0.0302811	0.926	3445	tags=41%, list=18%, signal=50%
GO_SEX_CHROMOSOME	GO_SEX_CHROMOSOME		27	0.608484	1.81429	0.00823045	0.0305799	0.927	2859	tags=48%, list=15%, signal=57%
GO_UNFOLDED_PROTEIN_BINDING	GO_UNFOLDED_PROTEIN_BINDING		91	0.526055	1.81308	0.0059761	0.0308246	0.928	5240	tags=58%, list=28%, signal=81%
GO_ATP_GENERATION_FROM_ADP	GO_ATP_GENERATION_FROM_ADP		36	0.580038	1.81297	0.00801603	0.0307436	0.928	3397	tags=44%, list=18%, signal=54%
GO_REGULATION_OF_TRANSLATIONAL_ELONGATION	GO_REGULATION_OF_TRANSLATIONAL_ELONGATION		22	0.659376	1.81177	0.00417537	0.0309953	0.928	4361	tags=68%, list=23%, signal=89%
GO_RNA_SECONDARY_STRUCTURE_UNWINDING	GO_RNA_SECONDARY_STRUCTURE_UNWINDING		40	0.580872	1.81168	0.00854701	0.0309008	0.928	3980	tags=52%, list=21%, signal=67%
GO_SPINDLE_MIDZONE	GO_SPINDLE_MIDZONE		26	0.591022	1.81166	0.0157171	0.030788	0.928	1225	tags=46%, list=7%, signal=49%
GO_NUCLEAR_CYCLIN_DEPENDENT_PROTEIN_KINASE_HOLOENZYME_COMPLEX	GO_NUCLEAR_CYCLIN_DEPENDENT_PROTEIN_KINASE_HOLOENZYME_COMPLEX		15	0.679806	1.81035	0.00205761	0.0311172	0.929	5258	tags=87%, list=28%, signal=120%
GO_MATURATION_OF_SSU_RRNA	GO_MATURATION_OF_SSU_RRNA		40	0.668204	1.81007	0	0.0310952	0.929	5054	tags=83%, list=27%, signal=113%
GO_POSITIVE_REGULATION_OF_CYTOKINESIS	GO_POSITIVE_REGULATION_OF_CYTOKINESIS		30	0.562577	1.80992	0.00202429	0.0310285	0.929	1024	tags=33%, list=5%, signal=35%
GO_PYRIMIDINE_NUCLEOTIDE_BIOSYNTHETIC_PROCESS	GO_PYRIMIDINE_NUCLEOTIDE_BIOSYNTHETIC_PROCESS		28	0.579928	1.80973	0.00417537	0.0309685	0.929	2010	tags=43%, list=11%, signal=48%
GO_MITOCHONDRIAL_TRANSPORT	GO_MITOCHONDRIAL_TRANSPORT		161	0.500019	1.80964	0.010101	0.0308851	0.929	5979	tags=67%, list=32%, signal=98%
GO_DNA_POLYMERASE_ACTIVITY	GO_DNA_POLYMERASE_ACTIVITY		33	0.569732	1.80923	0.00828157	0.0308606	0.929	3089	tags=48%, list=17%, signal=58%
GO_TRANSCRIPTION_FROM_RNA_POLYMERASE_III_PROMOTER	GO_TRANSCRIPTION_FROM_RNA_POLYMERASE_III_PROMOTER		38	0.567162	1.8091	0.00421941	0.0308059	0.929	5198	tags=66%, list=28%, signal=91%
GO_TRANSFERASE_COMPLEX_TRANSFERRING_PHOSPHORUS_CONTAINING_GROUPS	GO_TRANSFERASE_COMPLEX_TRANSFERRING_PHOSPHORUS_CONTAINING_GROUPS		231	0.434837	1.80867	0.00621118	0.0307971	0.929	5815	tags=58%, list=31%, signal=83%
GO_POSITIVE_REGULATION_OF_TELOMERE_MAINTENANCE	GO_POSITIVE_REGULATION_OF_TELOMERE_MAINTENANCE		44	0.536676	1.80861	0.0122699	0.0307025	0.929	4815	tags=55%, list=26%, signal=73%
GO_NUCLEAR_ENVELOPE_ORGANIZATION	GO_NUCLEAR_ENVELOPE_ORGANIZATION		76	0.514407	1.8083	0.0165975	0.0307011	0.93	3735	tags=53%, list=20%, signal=65%
GO_NUCLEAR_BODY	GO_NUCLEAR_BODY		337	0.437065	1.80726	0.006	0.0309524	0.931	5480	tags=55%, list=29%, signal=76%
GO_MACROMOLECULE_METHYLATION	GO_MACROMOLECULE_METHYLATION		174	0.449108	1.80592	0.012474	0.0312751	0.934	4661	tags=46%, list=25%, signal=61%
GO_MEIOTIC_CELL_CYCLE_PROCESS	GO_MEIOTIC_CELL_CYCLE_PROCESS		132	0.485527	1.80432	0.0100806	0.0315982	0.934	3969	tags=40%, list=21%, signal=51%
GO_MLL1_2_COMPLEX	GO_MLL1_2_COMPLEX		26	0.611563	1.80417	0.0124224	0.0315377	0.934	5374	tags=65%, list=29%, signal=92%
GO_PROTEASOMAL_PROTEIN_CATABOLIC_PROCESS	GO_PROTEASOMAL_PROTEIN_CATABOLIC_PROCESS		264	0.45028	1.80388	0.00617284	0.0315503	0.934	5303	tags=54%, list=28%, signal=75%
GO_REGULATION_OF_CELLULAR_RESPONSE_TO_HEAT	GO_REGULATION_OF_CELLULAR_RESPONSE_TO_HEAT		72	0.532665	1.8036	0.0183673	0.0315241	0.934	5481	tags=75%, list=29%, signal=106%
GO_CELLULAR_PROTEIN_COMPLEX_DISASSEMBLY	GO_CELLULAR_PROTEIN_COMPLEX_DISASSEMBLY		120	0.585148	1.80309	0.00829876	0.0315732	0.934	4066	tags=64%, list=22%, signal=81%
GO_MATURATION_OF_5_8S_RRNA	GO_MATURATION_OF_5_8S_RRNA		28	0.705314	1.80279	0.00417537	0.0315439	0.934	4493	tags=86%, list=24%, signal=113%
GO_MITOTIC_SPINDLE_ORGANIZATION	GO_MITOTIC_SPINDLE_ORGANIZATION		65	0.543146	1.80247	0.0222672	0.0315621	0.934	3676	tags=57%, list=20%, signal=71%
GO_ORGANOPHOSPHATE_ESTER_TRANSMEMBRANE_TRANSPORTER_ACTIVITY	GO_ORGANOPHOSPHATE_ESTER_TRANSMEMBRANE_TRANSPORTER_ACTIVITY		23	0.601577	1.80216	0.00397614	0.0315743	0.934	4806	tags=70%, list=26%, signal=93%
GO_SMALL_SUBUNIT_PROCESSOME	GO_SMALL_SUBUNIT_PROCESSOME		32	0.685296	1.80191	0.00626305	0.0315361	0.934	4070	tags=78%, list=22%, signal=100%
GO_NUCLEOTIDE_EXCISION_REPAIR_DNA_DUPLEX_UNWINDING	GO_NUCLEOTIDE_EXCISION_REPAIR_DNA_DUPLEX_UNWINDING		22	0.623598	1.79946	0.00803213	0.032192	0.938	4309	tags=55%, list=23%, signal=71%
GO_RNA_CAPPING	GO_RNA_CAPPING		34	0.627243	1.79917	0.00406504	0.0321824	0.938	6439	tags=85%, list=34%, signal=130%
GO_PYRIMIDINE_CONTAINING_COMPOUND_METABOLIC_PROCESS	GO_PYRIMIDINE_CONTAINING_COMPOUND_METABOLIC_PROCESS		71	0.457811	1.79519	0	0.0332857	0.947	4208	tags=38%, list=22%, signal=49%
GO_NUCLEOBASE_METABOLIC_PROCESS	GO_NUCLEOBASE_METABOLIC_PROCESS		37	0.558542	1.79476	0.00419287	0.033288	0.947	1482	tags=35%, list=8%, signal=38%
GO_NEGATIVE_REGULATION_OF_RNA_SPLICING	GO_NEGATIVE_REGULATION_OF_RNA_SPLICING		24	0.656598	1.79406	0.00203252	0.033417	0.947	3372	tags=67%, list=18%, signal=81%
GO_DSRNA_FRAGMENTATION	GO_DSRNA_FRAGMENTATION		18	0.625687	1.79404	0.0101833	0.033316	0.947	1726	tags=33%, list=9%, signal=37%
GO_NUCLEAR_TRANSPORT	GO_NUCLEAR_TRANSPORT		342	0.421781	1.7939	0	0.0332617	0.947	4474	tags=46%, list=24%, signal=60%
GO_LIGASE_ACTIVITY_FORMING_CARBON_NITROGEN_BONDS	GO_LIGASE_ACTIVITY_FORMING_CARBON_NITROGEN_BONDS		52	0.525956	1.79382	0.00840336	0.0331782	0.947	2666	tags=44%, list=14%, signal=51%
GO_ERROR_FREE_TRANSLESION_SYNTHESIS	GO_ERROR_FREE_TRANSLESION_SYNTHESIS		17	0.699317	1.79364	0.0137795	0.0331185	0.947	5101	tags=88%, list=27%, signal=121%
GO_OXIDOREDUCTASE_ACTIVITY_ACTING_ON_THE_CH_CH_GROUP_OF_DONORS	GO_OXIDOREDUCTASE_ACTIVITY_ACTING_ON_THE_CH_CH_GROUP_OF_DONORS		56	0.521836	1.79335	0.00831601	0.0331129	0.949	4416	tags=54%, list=24%, signal=70%
GO_MEIOTIC_CELL_CYCLE	GO_MEIOTIC_CELL_CYCLE		164	0.471998	1.7928	0.00813008	0.0331979	0.949	3969	tags=38%, list=21%, signal=48%
GO_HISTONE_MRNA_METABOLIC_PROCESS	GO_HISTONE_MRNA_METABOLIC_PROCESS		28	0.63706	1.79192	0.00608519	0.0333891	0.95	4801	tags=75%, list=26%, signal=101%
GO_PROTEIN_DNA_COMPLEX_SUBUNIT_ORGANIZATION	GO_PROTEIN_DNA_COMPLEX_SUBUNIT_ORGANIZATION		212	0.489181	1.79188	0.0141414	0.0333022	0.95	4836	tags=53%, list=26%, signal=70%
GO_CLEAVAGE_INVOLVED_IN_RRNA_PROCESSING	GO_CLEAVAGE_INVOLVED_IN_RRNA_PROCESSING		19	0.725235	1.79185	0.00210084	0.0331983	0.95	3714	tags=79%, list=20%, signal=98%
GO_REGULATION_OF_HISTONE_H3_K4_METHYLATION	GO_REGULATION_OF_HISTONE_H3_K4_METHYLATION		24	0.621914	1.78945	0.00203252	0.033883	0.951	4296	tags=58%, list=23%, signal=76%
GO_DNA_REPAIR_COMPLEX	GO_DNA_REPAIR_COMPLEX		37	0.561214	1.78875	0.011976	0.0340429	0.953	4877	tags=59%, list=26%, signal=80%
GO_SPINDLE_ASSEMBLY	GO_SPINDLE_ASSEMBLY		68	0.522888	1.78874	0.00618557	0.0339358	0.953	4083	tags=59%, list=22%, signal=75%
GO_REGULATION_OF_TRANSLATION_IN_RESPONSE_TO_STRESS	GO_REGULATION_OF_TRANSLATION_IN_RESPONSE_TO_STRESS		19	0.597062	1.78852	0.0019802	0.0339019	0.954	4980	tags=53%, list=27%, signal=72%
GO_STRAND_DISPLACEMENT	GO_STRAND_DISPLACEMENT		25	0.680364	1.78837	0.0122699	0.0338332	0.954	3969	tags=76%, list=21%, signal=96%
GO_REGULATION_OF_NUCLEASE_ACTIVITY	GO_REGULATION_OF_NUCLEASE_ACTIVITY		23	0.609391	1.78778	0.00806452	0.0338883	0.954	6195	tags=70%, list=33%, signal=104%
GO_NUCLEOTIDE_TRANSMEMBRANE_TRANSPORTER_ACTIVITY	GO_NUCLEOTIDE_TRANSMEMBRANE_TRANSPORTER_ACTIVITY		19	0.613776	1.7874	0.0101833	0.0339067	0.954	4806	tags=68%, list=26%, signal=92%
GO_PYRIMIDINE_NUCLEOSIDE_TRIPHOSPHATE_BIOSYNTHETIC_PROCESS	GO_PYRIMIDINE_NUCLEOSIDE_TRIPHOSPHATE_BIOSYNTHETIC_PROCESS		17	0.620093	1.78651	0.004	0.0341305	0.955	2010	tags=47%, list=11%, signal=53%
GO_PEPTIDYL_ARGININE_MODIFICATION	GO_PEPTIDYL_ARGININE_MODIFICATION		18	0.599318	1.78582	0.0126582	0.0342625	0.956	2633	tags=39%, list=14%, signal=45%
GO_NCRNA_CATABOLIC_PROCESS	GO_NCRNA_CATABOLIC_PROCESS		22	0.601303	1.78451	0.00585938	0.034549	0.957	4386	tags=68%, list=23%, signal=89%
GO_COENZYME_BINDING	GO_COENZYME_BINDING		173	0.447448	1.78447	0.0120482	0.034462	0.957	4713	tags=50%, list=25%, signal=66%
GO_MATURATION_OF_SSU_RRNA_FROM_TRICISTRONIC_RRNA_TRANSCRIPT_SSU_RRNA_5_8S_RRNA_LSU_RRNA_	GO_MATURATION_OF_SSU_RRNA_FROM_TRICISTRONIC_RRNA_TRANSCRIPT_SSU_RRNA_5_8S_RRNA_LSU_RRNA_		33	0.681018	1.78397	0.00430108	0.0345486	0.957	5054	tags=85%, list=27%, signal=116%
GO_NUCLEOBASE_CONTAINING_COMPOUND_TRANSMEMBRANE_TRANSPORTER_ACTIVITY	GO_NUCLEOBASE_CONTAINING_COMPOUND_TRANSMEMBRANE_TRANSPORTER_ACTIVITY		31	0.53761	1.78364	0.00404858	0.0345366	0.957	4806	tags=52%, list=26%, signal=69%
GO_TRANSLATION_INITIATION_FACTOR_BINDING	GO_TRANSLATION_INITIATION_FACTOR_BINDING		27	0.604063	1.78276	0.00614754	0.0347907	0.959	5716	tags=70%, list=31%, signal=101%
GO_N_TERMINAL_PROTEIN_AMINO_ACID_MODIFICATION	GO_N_TERMINAL_PROTEIN_AMINO_ACID_MODIFICATION		24	0.56339	1.78161	0.0141988	0.0350123	0.959	4595	tags=58%, list=25%, signal=77%
GO_DNA_ALKYLATION	GO_DNA_ALKYLATION		43	0.528757	1.781	0.0102249	0.0350966	0.959	2913	tags=33%, list=16%, signal=38%
GO_TRANSLATIONAL_ELONGATION	GO_TRANSLATIONAL_ELONGATION		108	0.634949	1.78051	0.0123711	0.035165	0.959	4310	tags=73%, list=23%, signal=94%
GO_CARBOXY_TERMINAL_DOMAIN_PROTEIN_KINASE_COMPLEX	GO_CARBOXY_TERMINAL_DOMAIN_PROTEIN_KINASE_COMPLEX		22	0.651102	1.78046	0.00804829	0.0350774	0.959	5258	tags=82%, list=28%, signal=114%
GO_SIN3_TYPE_COMPLEX	GO_SIN3_TYPE_COMPLEX		16	0.640085	1.78042	0.0211946	0.0349852	0.959	3062	tags=56%, list=16%, signal=67%
GO_TRANSLATION_INITIATION_FACTOR_ACTIVITY	GO_TRANSLATION_INITIATION_FACTOR_ACTIVITY		49	0.603792	1.77951	0.0164948	0.0352003	0.96	5698	tags=76%, list=30%, signal=108%
GO_APOPTOTIC_NUCLEAR_CHANGES	GO_APOPTOTIC_NUCLEAR_CHANGES		24	0.578149	1.7792	0.00595238	0.0352139	0.96	4800	tags=63%, list=26%, signal=84%
GO_MITOCHONDRIAL_TRANSLATION	GO_MITOCHONDRIAL_TRANSLATION		104	0.665118	1.77894	0.00631579	0.0352041	0.961	5178	tags=84%, list=28%, signal=115%
GO_DEOXYRIBOSE_PHOSPHATE_CATABOLIC_PROCESS	GO_DEOXYRIBOSE_PHOSPHATE_CATABOLIC_PROCESS		21	0.614325	1.77728	0.0122449	0.0356428	0.963	4208	tags=62%, list=22%, signal=80%
GO_TRANSLATION_FACTOR_ACTIVITY_RNA_BINDING	GO_TRANSLATION_FACTOR_ACTIVITY_RNA_BINDING		83	0.539587	1.77714	0.0205761	0.0356052	0.964	5698	tags=71%, list=30%, signal=102%
GO_NUCLEOTIDE_EXCISION_REPAIR_PREINCISION_COMPLEX_ASSEMBLY	GO_NUCLEOTIDE_EXCISION_REPAIR_PREINCISION_COMPLEX_ASSEMBLY		29	0.613627	1.77673	0.00801603	0.0356338	0.964	5258	tags=66%, list=28%, signal=91%
GO_NUCLEOSIDE_MONOPHOSPHATE_METABOLIC_PROCESS	GO_NUCLEOSIDE_MONOPHOSPHATE_METABOLIC_PROCESS		229	0.507375	1.77605	0.0161616	0.0357727	0.964	5406	tags=59%, list=29%, signal=83%
GO_ATPASE_ACTIVITY_COUPLED	GO_ATPASE_ACTIVITY_COUPLED		309	0.409144	1.77525	0.0020284	0.0359422	0.965	3762	tags=39%, list=20%, signal=49%
GO_NUCLEOSIDE_SALVAGE	GO_NUCLEOSIDE_SALVAGE		16	0.648197	1.77304	0.00617284	0.036619	0.966	2871	tags=50%, list=15%, signal=59%
GO_CYTOPLASMIC_MRNA_PROCESSING_BODY	GO_CYTOPLASMIC_MRNA_PROCESSING_BODY		63	0.48688	1.7721	0.0102881	0.0368279	0.967	3933	tags=48%, list=21%, signal=60%
GO_MRNA_CLEAVAGE_FACTOR_COMPLEX	GO_MRNA_CLEAVAGE_FACTOR_COMPLEX		17	0.685716	1.77198	0.00811359	0.0367755	0.967	3998	tags=76%, list=21%, signal=97%
GO_ANAPHASE_PROMOTING_COMPLEX	GO_ANAPHASE_PROMOTING_COMPLEX		20	0.653164	1.77005	0.0125	0.0373524	0.968	4548	tags=75%, list=24%, signal=99%
GO_RNA_CATABOLIC_PROCESS	GO_RNA_CATABOLIC_PROCESS		217	0.536754	1.76958	0.0436508	0.0374423	0.968	6506	tags=75%, list=35%, signal=114%
GO_REGULATION_OF_DNA_REPLICATION	GO_REGULATION_OF_DNA_REPLICATION		152	0.435329	1.7695	0.00994036	0.0373794	0.968	4285	tags=48%, list=23%, signal=62%
GO_SPLICEOSOMAL_SNRNP_ASSEMBLY	GO_SPLICEOSOMAL_SNRNP_ASSEMBLY		37	0.647005	1.76938	0.00416667	0.0373172	0.968	5208	tags=84%, list=28%, signal=116%
GO_CYTOPLASMIC_EXOSOME_RNASE_COMPLEX_	GO_CYTOPLASMIC_EXOSOME_RNASE_COMPLEX_		15	0.715671	1.76844	0.0040568	0.0375066	0.968	3594	tags=80%, list=19%, signal=99%
GO_REGULATION_OF_MICROTUBULE_POLYMERIZATION_OR_DEPOLYMERIZATION	GO_REGULATION_OF_MICROTUBULE_POLYMERIZATION_OR_DEPOLYMERIZATION		165	0.440087	1.76815	0.0162933	0.0374957	0.968	4083	tags=49%, list=22%, signal=62%
GO_MATURATION_OF_5_8S_RRNA_FROM_TRICISTRONIC_RRNA_TRANSCRIPT_SSU_RRNA_5_8S_RRNA_LSU_RRNA_	GO_MATURATION_OF_5_8S_RRNA_FROM_TRICISTRONIC_RRNA_TRANSCRIPT_SSU_RRNA_5_8S_RRNA_LSU_RRNA_		19	0.731087	1.76802	0.00650759	0.0374527	0.968	3714	tags=84%, list=20%, signal=105%
GO_CYTOCHROME_COMPLEX_ASSEMBLY	GO_CYTOCHROME_COMPLEX_ASSEMBLY		15	0.739835	1.76565	0.00406504	0.0381931	0.97	4320	tags=93%, list=23%, signal=121%
GO_REGULATION_OF_MICROTUBULE_BASED_PROCESS	GO_REGULATION_OF_MICROTUBULE_BASED_PROCESS		227	0.423976	1.76542	0.0180723	0.0381785	0.97	3997	tags=45%, list=21%, signal=57%
GO_REGULATION_OF_CELLULAR_PROTEIN_CATABOLIC_PROCESS	GO_REGULATION_OF_CELLULAR_PROTEIN_CATABOLIC_PROCESS		263	0.43371	1.76394	0.00203666	0.0385911	0.972	3826	tags=46%, list=20%, signal=57%
GO_ENDORIBONUCLEASE_ACTIVITY	GO_ENDORIBONUCLEASE_ACTIVITY		45	0.538274	1.7628	0.00990099	0.0389549	0.974	6146	tags=60%, list=33%, signal=89%
GO_CARBON_OXYGEN_LYASE_ACTIVITY	GO_CARBON_OXYGEN_LYASE_ACTIVITY		63	0.510285	1.76236	0.00641026	0.0390113	0.974	4467	tags=49%, list=24%, signal=64%
GO_RRNA_CATABOLIC_PROCESS	GO_RRNA_CATABOLIC_PROCESS		17	0.649517	1.76077	0.0059761	0.039527	0.975	5530	tags=88%, list=30%, signal=125%
GO_GLUCOSE_6_PHOSPHATE_METABOLIC_PROCESS	GO_GLUCOSE_6_PHOSPHATE_METABOLIC_PROCESS		21	0.620558	1.76016	0.0121951	0.0396878	0.975	4235	tags=62%, list=23%, signal=80%
GO_PYRIMIDINE_DEOXYRIBONUCLEOTIDE_METABOLIC_PROCESS	GO_PYRIMIDINE_DEOXYRIBONUCLEOTIDE_METABOLIC_PROCESS		16	0.662232	1.75851	0.00826446	0.0402133	0.976	4208	tags=63%, list=22%, signal=81%
GO_CAJAL_BODY	GO_CAJAL_BODY		49	0.552181	1.75727	0.0122449	0.0406051	0.977	5570	tags=71%, list=30%, signal=101%
GO_RIBONUCLEOPROTEIN_GRANULE	GO_RIBONUCLEOPROTEIN_GRANULE		140	0.437545	1.75686	0.00817996	0.0406785	0.977	3142	tags=38%, list=17%, signal=45%
GO_POSITIVE_REGULATION_OF_CELLULAR_PROTEIN_CATABOLIC_PROCESS	GO_POSITIVE_REGULATION_OF_CELLULAR_PROTEIN_CATABOLIC_PROCESS		186	0.448879	1.75561	0.00612245	0.0410763	0.977	3747	tags=48%, list=20%, signal=59%
GO_APOPTOTIC_DNA_FRAGMENTATION	GO_APOPTOTIC_DNA_FRAGMENTATION		15	0.624197	1.75451	0.00829876	0.0413722	0.978	2487	tags=47%, list=13%, signal=54%
GO_FOLIC_ACID_METABOLIC_PROCESS	GO_FOLIC_ACID_METABOLIC_PROCESS		17	0.656252	1.75428	0.00816326	0.0413224	0.979	1706	tags=53%, list=9%, signal=58%
GO_GLYCOSYL_COMPOUND_METABOLIC_PROCESS	GO_GLYCOSYL_COMPOUND_METABOLIC_PROCESS		348	0.448448	1.75391	0.0122449	0.0413659	0.979	5696	tags=55%, list=30%, signal=77%
GO_INTERCELLULAR_BRIDGE	GO_INTERCELLULAR_BRIDGE		40	0.497439	1.75367	0.0102249	0.0413317	0.979	6458	tags=65%, list=35%, signal=99%
GO_NUCLEOSOMAL_DNA_BINDING	GO_NUCLEOSOMAL_DNA_BINDING		29	0.642949	1.75341	0.0221328	0.0413271	0.979	5425	tags=69%, list=29%, signal=97%
GO_PTERIDINE_CONTAINING_COMPOUND_METABOLIC_PROCESS	GO_PTERIDINE_CONTAINING_COMPOUND_METABOLIC_PROCESS		34	0.576708	1.75224	0.0125523	0.0417123	0.98	1706	tags=41%, list=9%, signal=45%
GO_POSITIVE_REGULATION_OF_MRNA_METABOLIC_PROCESS	GO_POSITIVE_REGULATION_OF_MRNA_METABOLIC_PROCESS		43	0.512758	1.75197	0.00828157	0.0416927	0.98	5144	tags=58%, list=27%, signal=80%
GO_REGULATION_OF_DNA_REPAIR	GO_REGULATION_OF_DNA_REPAIR		68	0.49622	1.75189	0.0105708	0.0416061	0.98	5368	tags=62%, list=29%, signal=86%
GO_GLYOXYLATE_METABOLIC_PROCESS	GO_GLYOXYLATE_METABOLIC_PROCESS		28	0.573164	1.75174	0.0118812	0.0415436	0.98	5267	tags=54%, list=28%, signal=74%
GO_DNA_DEPENDENT_DNA_REPLICATION_MAINTENANCE_OF_FIDELITY	GO_DNA_DEPENDENT_DNA_REPLICATION_MAINTENANCE_OF_FIDELITY		19	0.644629	1.75078	0.00616016	0.0417997	0.98	2131	tags=53%, list=11%, signal=59%
GO_PRERIBOSOME_LARGE_SUBUNIT_PRECURSOR	GO_PRERIBOSOME_LARGE_SUBUNIT_PRECURSOR		20	0.763058	1.75065	0.00424628	0.0417234	0.98	2560	tags=80%, list=14%, signal=93%
GO_REGULATION_OF_PROTEIN_MODIFICATION_BY_SMALL_PROTEIN_CONJUGATION_OR_REMOVAL	GO_REGULATION_OF_PROTEIN_MODIFICATION_BY_SMALL_PROTEIN_CONJUGATION_OR_REMOVAL		268	0.427692	1.74941	0.00606061	0.0421073	0.981	4347	tags=47%, list=23%, signal=60%
GO_RETROGRADE_VESICLE_MEDIATED_TRANSPORT_GOLGI_TO_ER	GO_RETROGRADE_VESICLE_MEDIATED_TRANSPORT_GOLGI_TO_ER		76	0.506476	1.74898	0.0118577	0.0421448	0.981	4182	tags=53%, list=22%, signal=68%
GO_POLY_PYRIMIDINE_TRACT_BINDING	GO_POLY_PYRIMIDINE_TRACT_BINDING		17	0.624186	1.74865	0.00819672	0.0421477	0.981	3176	tags=65%, list=17%, signal=78%
GO_ENDORIBONUCLEASE_ACTIVITY_PRODUCING_5_PHOSPHOMONOESTERS	GO_ENDORIBONUCLEASE_ACTIVITY_PRODUCING_5_PHOSPHOMONOESTERS		26	0.616966	1.74764	0.004	0.0424345	0.981	6146	tags=73%, list=33%, signal=109%
GO_CELLULAR_PROTEIN_COMPLEX_LOCALIZATION	GO_CELLULAR_PROTEIN_COMPLEX_LOCALIZATION		21	0.575582	1.74722	0.00809717	0.0424738	0.981	4003	tags=57%, list=21%, signal=73%
GO_MITOTIC_SPINDLE	GO_MITOTIC_SPINDLE		51	0.509971	1.74689	0.0140845	0.04249	0.981	2640	tags=45%, list=14%, signal=52%
GO_CHROMATIN	GO_CHROMATIN		416	0.416034	1.74616	0.0159363	0.042672	0.981	5455	tags=48%, list=29%, signal=66%
GO_CELL_CYCLE_G2_M_PHASE_TRANSITION	GO_CELL_CYCLE_G2_M_PHASE_TRANSITION		134	0.469976	1.74506	0.00811359	0.0429524	0.981	4751	tags=50%, list=25%, signal=67%
GO_NUCLEAR_PERIPHERY	GO_NUCLEAR_PERIPHERY		118	0.463611	1.74275	0.0144033	0.0437311	0.983	3022	tags=43%, list=16%, signal=51%
GO_INTRAMOLECULAR_TRANSFERASE_ACTIVITY	GO_INTRAMOLECULAR_TRANSFERASE_ACTIVITY		26	0.594983	1.74197	0.0182556	0.0439573	0.983	2480	tags=50%, list=13%, signal=58%
GO_RRNA_TRANSCRIPTION	GO_RRNA_TRANSCRIPTION		17	0.650079	1.74158	0.00823045	0.0439889	0.983	4771	tags=71%, list=26%, signal=95%
GO_SERINE_FAMILY_AMINO_ACID_METABOLIC_PROCESS	GO_SERINE_FAMILY_AMINO_ACID_METABOLIC_PROCESS		39	0.505812	1.7402	0.00828157	0.0443794	0.983	2158	tags=38%, list=12%, signal=43%
GO_EXON_EXON_JUNCTION_COMPLEX	GO_EXON_EXON_JUNCTION_COMPLEX		20	0.627906	1.73963	0.00422833	0.0445015	0.983	4232	tags=65%, list=23%, signal=84%
GO_MIDBODY	GO_MIDBODY		122	0.428109	1.73807	0.0121951	0.0450177	0.985	4756	tags=52%, list=25%, signal=70%
GO_COFACTOR_BINDING	GO_COFACTOR_BINDING		248	0.421284	1.73527	0.00828157	0.046025	0.985	4645	tags=46%, list=25%, signal=60%
GO_REGULATION_OF_CELLULAR_AMINE_METABOLIC_PROCESS	GO_REGULATION_OF_CELLULAR_AMINE_METABOLIC_PROCESS		86	0.516196	1.73454	0.0126582	0.0462161	0.985	4098	tags=53%, list=22%, signal=68%
GO_NUCLEOSIDE_TRIPHOSPHATE_METABOLIC_PROCESS	GO_NUCLEOSIDE_TRIPHOSPHATE_METABOLIC_PROCESS		214	0.505032	1.73428	0.0398406	0.0462221	0.985	5445	tags=60%, list=29%, signal=84%
GO_NEGATIVE_REGULATION_OF_TELOMERE_MAINTENANCE_VIA_TELOMERE_LENGTHENING	GO_NEGATIVE_REGULATION_OF_TELOMERE_MAINTENANCE_VIA_TELOMERE_LENGTHENING		17	0.639779	1.73406	0.0202429	0.0462085	0.985	1914	tags=47%, list=10%, signal=52%
GO_RIBOSOMAL_SMALL_SUBUNIT_BIOGENESIS	GO_RIBOSOMAL_SMALL_SUBUNIT_BIOGENESIS		54	0.640682	1.73234	0.0231579	0.0468509	0.986	5738	tags=83%, list=31%, signal=120%
GO_RIBOSOME_ASSEMBLY	GO_RIBOSOME_ASSEMBLY		50	0.651585	1.73167	0.0185567	0.0470148	0.986	5731	tags=82%, list=31%, signal=118%
GO_TRANSLATIONAL_TERMINATION	GO_TRANSLATIONAL_TERMINATION		91	0.654005	1.73144	0.025	0.0470033	0.986	4310	tags=76%, list=23%, signal=98%
GO_HEME_METABOLIC_PROCESS	GO_HEME_METABOLIC_PROCESS		29	0.579688	1.73135	0.0239044	0.0469347	0.986	2386	tags=38%, list=13%, signal=43%
GO_PYRUVATE_METABOLIC_PROCESS	GO_PYRUVATE_METABOLIC_PROCESS		60	0.483469	1.73098	0.00821355	0.0469582	0.986	4823	tags=47%, list=26%, signal=63%
GO_PROTEIN_MONOUBIQUITINATION	GO_PROTEIN_MONOUBIQUITINATION		49	0.520751	1.72926	0.0158103	0.0475232	0.987	6648	tags=69%, list=36%, signal=107%
GO_REGULATION_OF_CELL_DIVISION	GO_REGULATION_OF_CELL_DIVISION		253	0.382491	1.72898	0.00206612	0.047576	0.987	2833	tags=34%, list=15%, signal=39%
GO_SOMATIC_DIVERSIFICATION_OF_IMMUNOGLOBULINS	GO_SOMATIC_DIVERSIFICATION_OF_IMMUNOGLOBULINS		26	0.5819	1.72892	0.00994036	0.0474911	0.987	5368	tags=69%, list=29%, signal=97%
GO_PEPTIDE_N_ACETYLTRANSFERASE_ACTIVITY	GO_PEPTIDE_N_ACETYLTRANSFERASE_ACTIVITY		58	0.498261	1.72806	0.0160966	0.0477431	0.988	6318	tags=59%, list=34%, signal=88%
GO_TRANSCRIPTION_FROM_RNA_POLYMERASE_I_PROMOTER	GO_TRANSCRIPTION_FROM_RNA_POLYMERASE_I_PROMOTER		34	0.590302	1.72751	0.0100604	0.0478546	0.988	6486	tags=79%, list=35%, signal=121%
GO_SPINDLE_MICROTUBULE	GO_SPINDLE_MICROTUBULE		57	0.509994	1.7268	0.0262097	0.0480569	0.988	3952	tags=49%, list=21%, signal=62%
GO_MONOCARBOXYLIC_ACID_CATABOLIC_PROCESS	GO_MONOCARBOXYLIC_ACID_CATABOLIC_PROCESS		95	0.475631	1.72569	0.0160321	0.0484012	0.988	6180	tags=59%, list=33%, signal=88%
GO_CYTOKINESIS	GO_CYTOKINESIS		80	0.454505	1.72567	0.0163599	0.0482912	0.988	4007	tags=48%, list=21%, signal=60%
GO_METHYLATION	GO_METHYLATION		239	0.415965	1.72531	0.0106157	0.0483336	0.988	5958	tags=53%, list=32%, signal=76%
GO_G2_DNA_DAMAGE_CHECKPOINT	GO_G2_DNA_DAMAGE_CHECKPOINT		31	0.535079	1.72521	0.022869	0.0482602	0.988	3186	tags=52%, list=17%, signal=62%
GO_TRANSFERASE_ACTIVITY_TRANSFERRING_ONE_CARBON_GROUPS	GO_TRANSFERASE_ACTIVITY_TRANSFERRING_ONE_CARBON_GROUPS		181	0.438549	1.72494	0.0175439	0.0482395	0.988	3979	tags=44%, list=21%, signal=56%
GO_ERAD_PATHWAY	GO_ERAD_PATHWAY		70	0.507736	1.72413	0.0196464	0.0485154	0.989	4555	tags=50%, list=24%, signal=66%
GO_PHOSPHATE_TRANSMEMBRANE_TRANSPORTER_ACTIVITY	GO_PHOSPHATE_TRANSMEMBRANE_TRANSPORTER_ACTIVITY		30	0.516682	1.72245	0.00798403	0.0491169	0.99	4806	tags=57%, list=26%, signal=76%
GO_ER_ASSOCIATED_UBIQUITIN_DEPENDENT_PROTEIN_CATABOLIC_PROCESS	GO_ER_ASSOCIATED_UBIQUITIN_DEPENDENT_PROTEIN_CATABOLIC_PROCESS		59	0.524944	1.72224	0.0194932	0.0490792	0.99	4555	tags=53%, list=24%, signal=69%
GO_POSITIVE_REGULATION_OF_CELL_CYCLE_PROCESS	GO_POSITIVE_REGULATION_OF_CELL_CYCLE_PROCESS		229	0.397585	1.72196	0.0040568	0.0490649	0.99	3682	tags=35%, list=20%, signal=43%
GO_RIBOSOMAL_LARGE_SUBUNIT_BIOGENESIS	GO_RIBOSOMAL_LARGE_SUBUNIT_BIOGENESIS		48	0.656764	1.72129	0.0290456	0.0491798	0.991	5649	tags=88%, list=30%, signal=125%
GO_REGULATION_OF_MEMBRANE_PERMEABILITY	GO_REGULATION_OF_MEMBRANE_PERMEABILITY		69	0.480016	1.72087	0	0.0492257	0.991	5979	tags=59%, list=32%, signal=87%
GO_NUCLEOSIDE_TRIPHOSPHATE_BIOSYNTHETIC_PROCESS	GO_NUCLEOSIDE_TRIPHOSPHATE_BIOSYNTHETIC_PROCESS		56	0.541272	1.72013	0.0300601	0.0494047	0.991	5445	tags=63%, list=29%, signal=88%
GO_KINESIN_COMPLEX	GO_KINESIN_COMPLEX		54	0.503151	1.71823	0.0157791	0.0501371	0.991	4756	tags=52%, list=25%, signal=69%
GO_ESTABLISHMENT_OF_PROTEIN_LOCALIZATION_TO_ORGANELLE	GO_ESTABLISHMENT_OF_PROTEIN_LOCALIZATION_TO_ORGANELLE		347	0.439848	1.71814	0.0354331	0.050065	0.991	6506	tags=64%, list=35%, signal=96%
GO_DNA_SECONDARY_STRUCTURE_BINDING	GO_DNA_SECONDARY_STRUCTURE_BINDING		24	0.641696	1.71806	0.0204918	0.0499857	0.991	3762	tags=67%, list=20%, signal=83%
GO_TRANSLATION_ELONGATION_FACTOR_ACTIVITY	GO_TRANSLATION_ELONGATION_FACTOR_ACTIVITY		19	0.632146	1.71788	0.00618557	0.0499173	0.991	4179	tags=68%, list=22%, signal=88%
GO_TELOMERE_MAINTENANCE_VIA_TELOMERE_LENGTHENING	GO_TELOMERE_MAINTENANCE_VIA_TELOMERE_LENGTHENING		24	0.560448	1.71541	0.020202	0.0508575	0.991	3140	tags=46%, list=17%, signal=55%
GO_TRNA_METHYLATION	GO_TRNA_METHYLATION		20	0.638057	1.71533	0.0250522	0.0507788	0.991	3246	tags=60%, list=17%, signal=73%
GO_TRNA_SPECIFIC_RIBONUCLEASE_ACTIVITY	GO_TRNA_SPECIFIC_RIBONUCLEASE_ACTIVITY		16	0.684693	1.71531	0.0163934	0.0506629	0.991	4255	tags=75%, list=23%, signal=97%
GO_CENTRIOLE_ASSEMBLY	GO_CENTRIOLE_ASSEMBLY		18	0.676222	1.71305	0.0203252	0.0515503	0.991	2832	tags=56%, list=15%, signal=65%
GO_PRENYLTRANSFERASE_ACTIVITY	GO_PRENYLTRANSFERASE_ACTIVITY		15	0.680056	1.71302	0.00869565	0.0514328	0.991	4089	tags=67%, list=22%, signal=85%
GO_PURINE_NUCLEOSIDE_BIOSYNTHETIC_PROCESS	GO_PURINE_NUCLEOSIDE_BIOSYNTHETIC_PROCESS		81	0.499183	1.71274	0.0159363	0.0514209	0.991	5970	tags=62%, list=32%, signal=90%
GO_POSITIVE_REGULATION_OF_NUCLEASE_ACTIVITY	GO_POSITIVE_REGULATION_OF_NUCLEASE_ACTIVITY		15	0.653493	1.7103	0.0182927	0.0524218	0.992	6195	tags=87%, list=33%, signal=129%
GO_NUCLEAR_TRANSCRIBED_MRNA_POLY_A_TAIL_SHORTENING	GO_NUCLEAR_TRANSCRIBED_MRNA_POLY_A_TAIL_SHORTENING		23	0.584824	1.70981	0.0195312	0.052517	0.992	3587	tags=52%, list=19%, signal=64%
GO_PROTEIN_TETRAMERIZATION	GO_PROTEIN_TETRAMERIZATION		131	0.4199	1.70959	0.00422833	0.0525003	0.992	4717	tags=44%, list=25%, signal=59%
GO_ORGANELLAR_SMALL_RIBOSOMAL_SUBUNIT	GO_ORGANELLAR_SMALL_RIBOSOMAL_SUBUNIT		25	0.713436	1.70588	0.00851064	0.0541192	0.992	4310	tags=80%, list=23%, signal=104%
GO_VIRION_ASSEMBLY	GO_VIRION_ASSEMBLY		36	0.539884	1.70433	0.0233463	0.0547349	0.992	6717	tags=72%, list=36%, signal=112%
GO_CHROMATIN_MODIFICATION	GO_CHROMATIN_MODIFICATION		494	0.395628	1.70431	0.0252427	0.0546182	0.992	5393	tags=47%, list=29%, signal=65%
GO_RNA_STABILIZATION	GO_RNA_STABILIZATION		29	0.546845	1.70315	0.0262097	0.0550208	0.992	3423	tags=48%, list=18%, signal=59%
GO_ORGANOPHOSPHATE_BIOSYNTHETIC_PROCESS	GO_ORGANOPHOSPHATE_BIOSYNTHETIC_PROCESS		427	0.360189	1.70252	0	0.0552055	0.992	4724	tags=41%, list=25%, signal=53%
GO_NUCLEAR_TRANSCRIPTION_FACTOR_COMPLEX	GO_NUCLEAR_TRANSCRIPTION_FACTOR_COMPLEX		126	0.422456	1.7015	0.00205339	0.0555721	0.992	5575	tags=51%, list=30%, signal=72%
GO_NCRNA_3_END_PROCESSING	GO_NCRNA_3_END_PROCESSING		20	0.6755	1.70142	0.0122699	0.0554734	0.992	5358	tags=85%, list=29%, signal=119%
GO_NUCLEAR_SPECK	GO_NUCLEAR_SPECK		190	0.433757	1.70129	0.0243902	0.0554082	0.992	5480	tags=56%, list=29%, signal=79%
GO_RESPONSE_TO_UV	GO_RESPONSE_TO_UV		120	0.421558	1.70082	0.0144628	0.0554984	0.992	4980	tags=48%, list=27%, signal=64%
GO_NEGATIVE_REGULATION_OF_DNA_REPLICATION	GO_NEGATIVE_REGULATION_OF_DNA_REPLICATION		51	0.490752	1.70011	0.0226337	0.055692	0.992	4078	tags=53%, list=22%, signal=68%
GO_MITOTIC_CYTOKINESIS	GO_MITOTIC_CYTOKINESIS		31	0.548216	1.69874	0.0262626	0.0561821	0.992	3648	tags=55%, list=19%, signal=68%
GO_NUCLEAR_MATRIX	GO_NUCLEAR_MATRIX		95	0.445227	1.6986	0.0164609	0.0560935	0.992	2568	tags=39%, list=14%, signal=45%
GO_REGULATION_OF_GENE_EXPRESSION_BY_GENETIC_IMPRINTING	GO_REGULATION_OF_GENE_EXPRESSION_BY_GENETIC_IMPRINTING		16	0.596823	1.69791	0.0117188	0.056343	0.992	2817	tags=44%, list=15%, signal=51%
GO_CYCLIN_DEPENDENT_PROTEIN_SERINE_THREONINE_KINASE_REGULATOR_ACTIVITY	GO_CYCLIN_DEPENDENT_PROTEIN_SERINE_THREONINE_KINASE_REGULATOR_ACTIVITY		27	0.521513	1.69713	0.0225873	0.0565716	0.992	3691	tags=44%, list=20%, signal=55%
GO_RRNA_MODIFICATION	GO_RRNA_MODIFICATION		23	0.651564	1.69386	0.00843882	0.0580137	0.992	3908	tags=70%, list=21%, signal=88%
GO_BLASTOCYST_DEVELOPMENT	GO_BLASTOCYST_DEVELOPMENT		59	0.442683	1.69362	0.0184049	0.0580065	0.992	3075	tags=36%, list=16%, signal=42%
GO_FORMATION_OF_TRANSLATION_PREINITIATION_COMPLEX	GO_FORMATION_OF_TRANSLATION_PREINITIATION_COMPLEX		20	0.694062	1.69335	0.027957	0.0580215	0.992	5698	tags=95%, list=30%, signal=136%
GO_CELLULAR_ALDEHYDE_METABOLIC_PROCESS	GO_CELLULAR_ALDEHYDE_METABOLIC_PROCESS		80	0.469375	1.6929	0.0182556	0.0581184	0.992	4713	tags=49%, list=25%, signal=65%
GO_PHOSPHOTRANSFERASE_ACTIVITY_FOR_OTHER_SUBSTITUTED_PHOSPHATE_GROUPS	GO_PHOSPHOTRANSFERASE_ACTIVITY_FOR_OTHER_SUBSTITUTED_PHOSPHATE_GROUPS		18	0.596884	1.6904	0.020284	0.0591524	0.993	5917	tags=78%, list=32%, signal=114%
GO_MULTI_ORGANISM_METABOLIC_PROCESS	GO_MULTI_ORGANISM_METABOLIC_PROCESS		136	0.609081	1.69028	0.0504032	0.0590971	0.993	6824	tags=88%, list=36%, signal=138%
GO_NUCLEAR_EXOSOME_RNASE_COMPLEX_	GO_NUCLEAR_EXOSOME_RNASE_COMPLEX_		15	0.694089	1.68925	0.0180723	0.0594862	0.993	3594	tags=73%, list=19%, signal=91%
GO_NUCLEOSIDE_PHOSPHATE_BIOSYNTHETIC_PROCESS	GO_NUCLEOSIDE_PHOSPHATE_BIOSYNTHETIC_PROCESS		174	0.40725	1.68924	0.00407332	0.0593522	0.993	3822	tags=42%, list=20%, signal=52%
GO_UBIQUITIN_LIKE_PROTEIN_BINDING	GO_UBIQUITIN_LIKE_PROTEIN_BINDING		113	0.428831	1.6887	0.0236686	0.0594588	0.993	5405	tags=53%, list=29%, signal=74%
GO_PROTEASOME_BINDING	GO_PROTEASOME_BINDING		16	0.635738	1.68845	0.00814664	0.0594547	0.993	4398	tags=69%, list=24%, signal=90%
GO_DNA_DIRECTED_RNA_POLYMERASE_III_COMPLEX	GO_DNA_DIRECTED_RNA_POLYMERASE_III_COMPLEX		18	0.624279	1.68844	0.018595	0.0593233	0.993	5143	tags=78%, list=27%, signal=107%
GO_PURINE_NUCLEOSIDE_MONOPHOSPHATE_BIOSYNTHETIC_PROCESS	GO_PURINE_NUCLEOSIDE_MONOPHOSPHATE_BIOSYNTHETIC_PROCESS		57	0.542862	1.68756	0.0243902	0.0596355	0.993	5400	tags=63%, list=29%, signal=89%
GO_TRNA_METHYLTRANSFERASE_ACTIVITY	GO_TRNA_METHYLTRANSFERASE_ACTIVITY		18	0.631014	1.68736	0.0295359	0.0596004	0.993	4596	tags=67%, list=25%, signal=88%
GO_RNA_POLYMERASE_II_TRANSCRIPTION_FACTOR_COMPLEX	GO_RNA_POLYMERASE_II_TRANSCRIPTION_FACTOR_COMPLEX		100	0.433255	1.68699	0.00626305	0.0596595	0.993	5575	tags=51%, list=30%, signal=72%
GO_PROTEIN_EXPORT_FROM_NUCLEUS	GO_PROTEIN_EXPORT_FROM_NUCLEUS		29	0.542975	1.68645	0.0163599	0.0597631	0.993	6104	tags=79%, list=33%, signal=118%
GO_SMALL_NUCLEOLAR_RIBONUCLEOPROTEIN_COMPLEX	GO_SMALL_NUCLEOLAR_RIBONUCLEOPROTEIN_COMPLEX		18	0.733937	1.68554	0.0143737	0.0600877	0.993	3348	tags=78%, list=18%, signal=95%
GO_PTERIDINE_CONTAINING_COMPOUND_BIOSYNTHETIC_PROCESS	GO_PTERIDINE_CONTAINING_COMPOUND_BIOSYNTHETIC_PROCESS		16	0.715431	1.68444	0.0212766	0.0604829	0.994	1706	tags=63%, list=9%, signal=69%
GO_CHROMATIN_ASSEMBLY_OR_DISASSEMBLY	GO_CHROMATIN_ASSEMBLY_OR_DISASSEMBLY		159	0.491897	1.6843	0.0289855	0.0604039	0.994	4820	tags=53%, list=26%, signal=71%
GO_NUCLEAR_ENVELOPE	GO_NUCLEAR_ENVELOPE		385	0.365968	1.68256	0.0145833	0.0611222	0.995	4687	tags=43%, list=25%, signal=56%
GO_CELLULAR_AMINO_ACID_METABOLIC_PROCESS	GO_CELLULAR_AMINO_ACID_METABOLIC_PROCESS		316	0.413168	1.68254	0.0169492	0.0609991	0.995	5746	tags=51%, list=31%, signal=73%
GO_REGULATION_OF_DNA_METABOLIC_PROCESS	GO_REGULATION_OF_DNA_METABOLIC_PROCESS		319	0.388854	1.6813	0.0184426	0.0614734	0.995	5377	tags=51%, list=29%, signal=70%
GO_DNA_MODIFICATION	GO_DNA_MODIFICATION		77	0.438238	1.6811	0.0105263	0.0614505	0.995	5540	tags=43%, list=30%, signal=61%
GO_POSITIVE_REGULATION_OF_RNA_SPLICING	GO_POSITIVE_REGULATION_OF_RNA_SPLICING		22	0.575035	1.68081	0.0374753	0.0614403	0.995	5035	tags=55%, list=27%, signal=75%
GO_VITAMIN_D_RECEPTOR_BINDING	GO_VITAMIN_D_RECEPTOR_BINDING		17	0.604777	1.68073	0.0138889	0.0613441	0.995	5947	tags=82%, list=32%, signal=121%
GO_U2_TYPE_SPLICEOSOMAL_COMPLEX	GO_U2_TYPE_SPLICEOSOMAL_COMPLEX		29	0.573226	1.68015	0.020284	0.0615077	0.995	5434	tags=72%, list=29%, signal=102%
GO_LIGASE_ACTIVITY	GO_LIGASE_ACTIVITY		379	0.387293	1.68011	0.0182927	0.0613939	0.995	5178	tags=47%, list=28%, signal=64%
GO_CYTOSKELETON_DEPENDENT_CYTOKINESIS	GO_CYTOSKELETON_DEPENDENT_CYTOKINESIS		38	0.513973	1.67968	0.0207039	0.061489	0.995	3648	tags=55%, list=19%, signal=69%
GO_INNER_MITOCHONDRIAL_MEMBRANE_ORGANIZATION	GO_INNER_MITOCHONDRIAL_MEMBRANE_ORGANIZATION		16	0.694187	1.67904	0.018711	0.0616789	0.995	5479	tags=94%, list=29%, signal=132%
GO_REGULATION_OF_CELLULAR_AMINO_ACID_METABOLIC_PROCESS	GO_REGULATION_OF_CELLULAR_AMINO_ACID_METABOLIC_PROCESS		65	0.559261	1.678	0.0336842	0.0620559	0.996	4098	tags=63%, list=22%, signal=80%
GO_METALLO_SULFUR_CLUSTER_ASSEMBLY	GO_METALLO_SULFUR_CLUSTER_ASSEMBLY		18	0.662073	1.67707	0.025	0.0623524	0.996	2386	tags=56%, list=13%, signal=64%
GO_ISOPRENOID_BIOSYNTHETIC_PROCESS	GO_ISOPRENOID_BIOSYNTHETIC_PROCESS		24	0.547531	1.67676	0.0302419	0.0623718	0.996	3890	tags=50%, list=21%, signal=63%
GO_ACYLGLYCEROL_O_ACYLTRANSFERASE_ACTIVITY	GO_ACYLGLYCEROL_O_ACYLTRANSFERASE_ACTIVITY		26	0.524306	1.67514	0.0241935	0.0630773	0.996	6813	tags=69%, list=36%, signal=109%
GO_N_METHYLTRANSFERASE_ACTIVITY	GO_N_METHYLTRANSFERASE_ACTIVITY		70	0.441691	1.67487	0.0286885	0.0630662	0.996	2923	tags=39%, list=16%, signal=46%
GO_INNATE_IMMUNE_RESPONSE_ACTIVATING_CELL_SURFACE_RECEPTOR_SIGNALING_PATHWAY	GO_INNATE_IMMUNE_RESPONSE_ACTIVATING_CELL_SURFACE_RECEPTOR_SIGNALING_PATHWAY		106	0.472743	1.67486	0.030426	0.062933	0.996	5062	tags=54%, list=27%, signal=73%
GO_SWI_SNF_SUPERFAMILY_TYPE_COMPLEX	GO_SWI_SNF_SUPERFAMILY_TYPE_COMPLEX		71	0.462664	1.67455	0.0354331	0.0629546	0.996	5119	tags=55%, list=27%, signal=75%
GO_HISTONE_BINDING	GO_HISTONE_BINDING		168	0.434215	1.67384	0.0325866	0.0632049	0.996	4461	tags=45%, list=24%, signal=58%
GO_CELL_DIVISION_SITE	GO_CELL_DIVISION_SITE		48	0.469787	1.67198	0.0222672	0.0640346	0.996	2936	tags=48%, list=16%, signal=57%
GO_MITOTIC_SPINDLE_ASSEMBLY	GO_MITOTIC_SPINDLE_ASSEMBLY		40	0.517291	1.6703	0.0342742	0.0647679	0.997	3676	tags=55%, list=20%, signal=68%
GO_ONE_CARBON_METABOLIC_PROCESS	GO_ONE_CARBON_METABOLIC_PROCESS		35	0.511952	1.66956	0.00806452	0.0650053	0.997	1797	tags=31%, list=10%, signal=35%
GO_THIOESTER_METABOLIC_PROCESS	GO_THIOESTER_METABOLIC_PROCESS		76	0.45676	1.66926	0.0183299	0.0650283	0.997	4701	tags=45%, list=25%, signal=60%
GO_REGULATION_OF_PROTEIN_COMPLEX_DISASSEMBLY	GO_REGULATION_OF_PROTEIN_COMPLEX_DISASSEMBLY		199	0.401019	1.66909	0.0124481	0.064975	0.997	4276	tags=47%, list=23%, signal=60%
GO_REGULATION_OF_CELLULAR_AMIDE_METABOLIC_PROCESS	GO_REGULATION_OF_CELLULAR_AMIDE_METABOLIC_PROCESS		324	0.380769	1.66798	0.01417	0.0654335	0.998	5757	tags=50%, list=31%, signal=71%
GO_SNRNA_BINDING	GO_SNRNA_BINDING		33	0.543256	1.66602	0.0253165	0.0662408	0.998	5254	tags=61%, list=28%, signal=84%
GO_POSITIVE_REGULATION_OF_VIRAL_TRANSCRIPTION	GO_POSITIVE_REGULATION_OF_VIRAL_TRANSCRIPTION		35	0.506703	1.66572	0.0116959	0.0662525	0.998	5254	tags=69%, list=28%, signal=95%
GO_PHOSPHOTRANSFERASE_ACTIVITY_PHOSPHATE_GROUP_AS_ACCEPTOR	GO_PHOSPHOTRANSFERASE_ACTIVITY_PHOSPHATE_GROUP_AS_ACCEPTOR		37	0.447059	1.66423	0.0121457	0.066958	0.998	2010	tags=32%, list=11%, signal=36%
GO_PYRIMIDINE_RIBONUCLEOSIDE_METABOLIC_PROCESS	GO_PYRIMIDINE_RIBONUCLEOSIDE_METABOLIC_PROCESS		30	0.483906	1.66237	0.0155945	0.0678531	0.998	2010	tags=30%, list=11%, signal=34%
GO_REGULATION_OF_HISTONE_METHYLATION	GO_REGULATION_OF_HISTONE_METHYLATION		51	0.493631	1.66214	0.0424242	0.0678188	0.998	3802	tags=45%, list=20%, signal=56%
GO_NAD_BINDING	GO_NAD_BINDING		53	0.509566	1.66207	0.0430328	0.0677074	0.998	4558	tags=57%, list=24%, signal=75%
GO_NUCLEOTIDE_EXCISION_REPAIR_PREINCISION_COMPLEX_STABILIZATION	GO_NUCLEOTIDE_EXCISION_REPAIR_PREINCISION_COMPLEX_STABILIZATION		21	0.586587	1.66172	0.0256917	0.0677571	0.998	5101	tags=62%, list=27%, signal=85%
GO_POSITIVE_REGULATION_OF_MITOCHONDRIAL_OUTER_MEMBRANE_PERMEABILIZATION_INVOLVED_IN_APOPTOTIC_SIGNALING_PATHWAY	GO_POSITIVE_REGULATION_OF_MITOCHONDRIAL_OUTER_MEMBRANE_PERMEABILIZATION_INVOLVED_IN_APOPTOTIC_SIGNALING_PATHWAY		36	0.530709	1.66158	0.0161616	0.0676802	0.998	5979	tags=72%, list=32%, signal=106%
GO_REGULATION_OF_PROTEASOMAL_PROTEIN_CATABOLIC_PROCESS	GO_REGULATION_OF_PROTEASOMAL_PROTEIN_CATABOLIC_PROCESS		173	0.408826	1.6599	0.01222	0.0684161	0.998	4965	tags=51%, list=27%, signal=69%
GO_REGULATION_OF_DOUBLE_STRAND_BREAK_REPAIR_VIA_HOMOLOGOUS_RECOMBINATION	GO_REGULATION_OF_DOUBLE_STRAND_BREAK_REPAIR_VIA_HOMOLOGOUS_RECOMBINATION		17	0.614118	1.65924	0.030303	0.0685981	0.998	3140	tags=53%, list=17%, signal=64%
GO_PROTEIN_TRANSMEMBRANE_TRANSPORT	GO_PROTEIN_TRANSMEMBRANE_TRANSPORT		49	0.511111	1.65879	0.0313808	0.068713	0.998	5459	tags=61%, list=29%, signal=86%
GO_PROTEIN_DNA_COMPLEX	GO_PROTEIN_DNA_COMPLEX		159	0.474598	1.65876	0.0368098	0.0685846	0.998	5977	tags=53%, list=32%, signal=77%
GO_REGULATION_OF_DOUBLE_STRAND_BREAK_REPAIR	GO_REGULATION_OF_DOUBLE_STRAND_BREAK_REPAIR		33	0.523286	1.65854	0.0263692	0.0685575	0.998	4170	tags=48%, list=22%, signal=62%
GO_FATTY_ACID_CATABOLIC_PROCESS	GO_FATTY_ACID_CATABOLIC_PROCESS		73	0.487153	1.65774	0.0363636	0.0688531	0.998	6180	tags=66%, list=33%, signal=98%
GO_PYRIMIDINE_NUCLEOSIDE_TRIPHOSPHATE_METABOLIC_PROCESS	GO_PYRIMIDINE_NUCLEOSIDE_TRIPHOSPHATE_METABOLIC_PROCESS		19	0.57634	1.65739	0.0204499	0.0689129	0.998	2010	tags=42%, list=11%, signal=47%
GO_REGULATION_OF_VIRAL_TRANSCRIPTION	GO_REGULATION_OF_VIRAL_TRANSCRIPTION		57	0.455923	1.65699	0.0295276	0.0689855	0.998	5347	tags=56%, list=29%, signal=78%
GO_ORGANELLAR_RIBOSOME	GO_ORGANELLAR_RIBOSOME		67	0.65961	1.65677	0.029724	0.0689637	0.998	4310	tags=76%, list=23%, signal=99%
GO_HISTONE_METHYLTRANSFERASE_ACTIVITY	GO_HISTONE_METHYLTRANSFERASE_ACTIVITY		48	0.464822	1.65602	0.0424242	0.0692245	0.998	2923	tags=40%, list=16%, signal=47%
GO_EUKARYOTIC_TRANSLATION_INITIATION_FACTOR_3_COMPLEX	GO_EUKARYOTIC_TRANSLATION_INITIATION_FACTOR_3_COMPLEX		16	0.692394	1.65584	0.021692	0.0691785	0.998	5716	tags=94%, list=31%, signal=135%
GO_TETRAPYRROLE_METABOLIC_PROCESS	GO_TETRAPYRROLE_METABOLIC_PROCESS		57	0.494951	1.65582	0.0137255	0.0690498	0.998	2386	tags=33%, list=13%, signal=38%
GO_HSP90_PROTEIN_BINDING	GO_HSP90_PROTEIN_BINDING		27	0.483617	1.65341	0.00970874	0.0702121	0.998	5195	tags=48%, list=28%, signal=67%
GO_SIGNAL_SEQUENCE_BINDING	GO_SIGNAL_SEQUENCE_BINDING		36	0.503206	1.65275	0.0474308	0.0704224	0.999	5232	tags=56%, list=28%, signal=77%
GO_GLOBAL_GENOME_NUCLEOTIDE_EXCISION_REPAIR	GO_GLOBAL_GENOME_NUCLEOTIDE_EXCISION_REPAIR		32	0.551155	1.6523	0.02	0.0705206	0.999	6833	tags=69%, list=37%, signal=108%
GO_FATTY_ACYL_COA_BINDING	GO_FATTY_ACYL_COA_BINDING		31	0.534995	1.65201	0.0331263	0.0705369	0.999	3797	tags=52%, list=20%, signal=65%
GO_CELLULAR_RESPONSE_TO_UV	GO_CELLULAR_RESPONSE_TO_UV		65	0.439673	1.65114	0.0180723	0.0708462	0.999	4980	tags=51%, list=27%, signal=69%
GO_SIGNAL_TRANSDUCTION_BY_P53_CLASS_MEDIATOR	GO_SIGNAL_TRANSDUCTION_BY_P53_CLASS_MEDIATOR		121	0.40782	1.6509	0.012024	0.0708434	0.999	5304	tags=45%, list=28%, signal=63%
GO_REGULATION_OF_TELOMERASE_RNA_LOCALIZATION_TO_CAJAL_BODY	GO_REGULATION_OF_TELOMERASE_RNA_LOCALIZATION_TO_CAJAL_BODY		15	0.736921	1.64962	0.0387755	0.0713818	0.999	4932	tags=100%, list=26%, signal=136%
GO_NUCLEOBASE_CONTAINING_COMPOUND_KINASE_ACTIVITY	GO_NUCLEOBASE_CONTAINING_COMPOUND_KINASE_ACTIVITY		45	0.433423	1.64953	0.00419287	0.0712869	0.999	3582	tags=40%, list=19%, signal=49%
GO_NEGATIVE_REGULATION_OF_ORGANELLE_ORGANIZATION	GO_NEGATIVE_REGULATION_OF_ORGANELLE_ORGANIZATION		365	0.358527	1.64843	0.0262097	0.0716964	0.999	4083	tags=40%, list=22%, signal=50%
GO_STRUCTURAL_CONSTITUENT_OF_RIBOSOME	GO_STRUCTURAL_CONSTITUENT_OF_RIBOSOME		202	0.582254	1.64709	0.0726141	0.0723383	1	6506	tags=78%, list=35%, signal=118%
GO_HISTONE_H3_K4_METHYLATION	GO_HISTONE_H3_K4_METHYLATION		27	0.521433	1.64686	0.0178218	0.0723179	1	6980	tags=63%, list=37%, signal=100%
GO_PIGMENT_METABOLIC_PROCESS	GO_PIGMENT_METABOLIC_PROCESS		61	0.445035	1.64625	0.0181087	0.0724911	1	2386	tags=31%, list=13%, signal=36%
GO_CELLULAR_COMPONENT_DISASSEMBLY	GO_CELLULAR_COMPONENT_DISASSEMBLY		492	0.365518	1.64261	0.00617284	0.0744413	1	4386	tags=44%, list=23%, signal=56%
GO_INTRACELLULAR_ESTROGEN_RECEPTOR_SIGNALING_PATHWAY	GO_INTRACELLULAR_ESTROGEN_RECEPTOR_SIGNALING_PATHWAY		18	0.527746	1.64213	0.0214425	0.0745451	1	1838	tags=33%, list=10%, signal=37%
GO_LYSOPHOSPHOLIPID_ACYLTRANSFERASE_ACTIVITY	GO_LYSOPHOSPHOLIPID_ACYLTRANSFERASE_ACTIVITY		17	0.56392	1.6421	0.0252427	0.0744191	1	3991	tags=53%, list=21%, signal=67%
GO_POSITIVE_REGULATION_OF_VIRAL_PROCESS	GO_POSITIVE_REGULATION_OF_VIRAL_PROCESS		84	0.441203	1.64178	0.0167715	0.0744305	1	6556	tags=71%, list=35%, signal=109%
GO_VIRAL_LIFE_CYCLE	GO_VIRAL_LIFE_CYCLE		278	0.434675	1.64143	0.0623742	0.0744837	1	6837	tags=67%, list=37%, signal=104%
GO_POSITIVE_REGULATION_OF_MRNA_PROCESSING	GO_POSITIVE_REGULATION_OF_MRNA_PROCESSING		30	0.523053	1.64103	0.0231579	0.074561	1	3805	tags=50%, list=20%, signal=63%
GO_THREONINE_TYPE_PEPTIDASE_ACTIVITY	GO_THREONINE_TYPE_PEPTIDASE_ACTIVITY		21	0.710263	1.64011	0.0365591	0.0749637	1	4098	tags=81%, list=22%, signal=104%
GO_POSITIVE_REGULATION_OF_DNA_METABOLIC_PROCESS	GO_POSITIVE_REGULATION_OF_DNA_METABOLIC_PROCESS		173	0.385163	1.63653	0.0224033	0.0768822	1	4900	tags=49%, list=26%, signal=66%
GO_REGULATION_OF_PROTEASOMAL_UBIQUITIN_DEPENDENT_PROTEIN_CATABOLIC_PROCESS	GO_REGULATION_OF_PROTEASOMAL_UBIQUITIN_DEPENDENT_PROTEIN_CATABOLIC_PROCESS		141	0.408689	1.63645	0.0221774	0.0767737	1	3826	tags=44%, list=20%, signal=55%
GO_POSITIVE_REGULATION_OF_DNA_BIOSYNTHETIC_PROCESS	GO_POSITIVE_REGULATION_OF_DNA_BIOSYNTHETIC_PROCESS		57	0.45513	1.63556	0.0290456	0.0771331	1	2091	tags=40%, list=11%, signal=45%
GO_XY_BODY	GO_XY_BODY		15	0.602726	1.63466	0.02537	0.0775272	1	5541	tags=67%, list=30%, signal=95%
GO_PROTEIN_TARGETING_TO_MITOCHONDRION	GO_PROTEIN_TARGETING_TO_MITOCHONDRION		46	0.573839	1.63428	0.0375783	0.0776166	1	5353	tags=74%, list=29%, signal=103%
GO_PRESPLICEOSOME	GO_PRESPLICEOSOME		21	0.604038	1.63409	0.028	0.0775708	1	4696	tags=71%, list=25%, signal=95%
GO_RRNA_METHYLATION	GO_RRNA_METHYLATION		15	0.632865	1.63396	0.0250522	0.0774956	1	3908	tags=67%, list=21%, signal=84%
GO_NUCLEAR_UBIQUITIN_LIGASE_COMPLEX	GO_NUCLEAR_UBIQUITIN_LIGASE_COMPLEX		39	0.499358	1.63242	0.0475248	0.0783089	1	3648	tags=49%, list=19%, signal=60%
GO_REGULATION_OF_CYCLIN_DEPENDENT_PROTEIN_KINASE_ACTIVITY	GO_REGULATION_OF_CYCLIN_DEPENDENT_PROTEIN_KINASE_ACTIVITY		93	0.391719	1.6324	0.00829876	0.0781734	1	3691	tags=40%, list=20%, signal=49%
GO_LYSINE_ACETYLATED_HISTONE_BINDING	GO_LYSINE_ACETYLATED_HISTONE_BINDING		16	0.630293	1.63234	0.0298805	0.0780677	1	3382	tags=50%, list=18%, signal=61%
GO_PROTEIN_LOCALIZATION_TO_MITOCHONDRION	GO_PROTEIN_LOCALIZATION_TO_MITOCHONDRION		62	0.5139	1.63159	0.0393375	0.0783688	1	5353	tags=68%, list=29%, signal=95%
GO_PROTEIN_ACETYLATION	GO_PROTEIN_ACETYLATION		112	0.419505	1.63144	0.028169	0.0783006	1	6335	tags=54%, list=34%, signal=81%
GO_ACETYLTRANSFERASE_COMPLEX	GO_ACETYLTRANSFERASE_COMPLEX		84	0.45797	1.63095	0.0320641	0.0784342	1	6335	tags=57%, list=34%, signal=86%
GO_COVALENT_CHROMATIN_MODIFICATION	GO_COVALENT_CHROMATIN_MODIFICATION		312	0.386112	1.63079	0.0299401	0.0783884	1	5393	tags=46%, list=29%, signal=64%
GO_REGULATION_OF_HISTONE_H3_K9_METHYLATION	GO_REGULATION_OF_HISTONE_H3_K9_METHYLATION		17	0.579167	1.62985	0.0285714	0.0787909	1	3802	tags=53%, list=20%, signal=66%
GO_INTRINSIC_COMPONENT_OF_MITOCHONDRIAL_INNER_MEMBRANE	GO_INTRINSIC_COMPONENT_OF_MITOCHONDRIAL_INNER_MEMBRANE		16	0.665428	1.62946	0.02537	0.0788596	1	3566	tags=69%, list=19%, signal=85%
GO_MITOCHONDRIAL_TRANSMEMBRANE_TRANSPORT	GO_MITOCHONDRIAL_TRANSMEMBRANE_TRANSPORT		52	0.56895	1.62701	0.044898	0.0801824	1	5353	tags=75%, list=29%, signal=105%
GO_MRNA_CIS_SPLICING_VIA_SPLICEOSOME	GO_MRNA_CIS_SPLICING_VIA_SPLICEOSOME		17	0.609178	1.62642	0.0208768	0.0804138	1	4696	tags=65%, list=25%, signal=86%
GO_NEGATIVE_REGULATION_OF_PROTEIN_COMPLEX_DISASSEMBLY	GO_NEGATIVE_REGULATION_OF_PROTEIN_COMPLEX_DISASSEMBLY		157	0.398831	1.62601	0.0365112	0.0804973	1	4276	tags=46%, list=23%, signal=60%
GO_INTRINSIC_COMPONENT_OF_ENDOPLASMIC_RETICULUM_MEMBRANE	GO_INTRINSIC_COMPONENT_OF_ENDOPLASMIC_RETICULUM_MEMBRANE		116	0.435288	1.62471	0.025641	0.0811457	1	5950	tags=55%, list=32%, signal=80%
GO_DICARBOXYLIC_ACID_METABOLIC_PROCESS	GO_DICARBOXYLIC_ACID_METABOLIC_PROCESS		99	0.432319	1.62444	0.0245399	0.081142	1	4882	tags=47%, list=26%, signal=64%
GO_PROTEASOME_ACCESSORY_COMPLEX	GO_PROTEASOME_ACCESSORY_COMPLEX		23	0.676267	1.62353	0.0392562	0.0815948	1	3697	tags=78%, list=20%, signal=97%
GO_MRNA_BINDING	GO_MRNA_BINDING		144	0.426231	1.62318	0.0386179	0.0816405	1	4801	tags=51%, list=26%, signal=69%
GO_PREASSEMBLY_OF_GPI_ANCHOR_IN_ER_MEMBRANE	GO_PREASSEMBLY_OF_GPI_ANCHOR_IN_ER_MEMBRANE		15	0.623328	1.62269	0.0285714	0.0818118	1	4550	tags=60%, list=24%, signal=79%
GO_MONOSACCHARIDE_BIOSYNTHETIC_PROCESS	GO_MONOSACCHARIDE_BIOSYNTHETIC_PROCESS		53	0.495015	1.62191	0.0412371	0.0821246	1	5989	tags=57%, list=32%, signal=83%
GO_NUCLEOCYTOPLASMIC_TRANSPORTER_ACTIVITY	GO_NUCLEOCYTOPLASMIC_TRANSPORTER_ACTIVITY		23	0.644177	1.62137	0.0442105	0.0822808	1	3393	tags=65%, list=18%, signal=80%
GO_TUMOR_NECROSIS_FACTOR_MEDIATED_SIGNALING_PATHWAY	GO_TUMOR_NECROSIS_FACTOR_MEDIATED_SIGNALING_PATHWAY		116	0.467862	1.62103	0.044898	0.0823502	1	4545	tags=48%, list=24%, signal=63%
GO_ER_NUCLEUS_SIGNALING_PATHWAY	GO_ER_NUCLEUS_SIGNALING_PATHWAY		31	0.535912	1.61981	0.0282828	0.0828882	1	5480	tags=58%, list=29%, signal=82%
GO_RIBOSOME	GO_RIBOSOME		213	0.584074	1.61908	0.0802469	0.0831937	1	6728	tags=84%, list=36%, signal=129%
GO_REGULATION_OF_CELL_CYCLE_ARREST	GO_REGULATION_OF_CELL_CYCLE_ARREST		101	0.399959	1.61743	0.019305	0.0840165	1	3441	tags=35%, list=18%, signal=42%
GO_REGULATION_OF_VIRAL_RELEASE_FROM_HOST_CELL	GO_REGULATION_OF_VIRAL_RELEASE_FROM_HOST_CELL		31	0.508694	1.61395	0.0350515	0.0860018	1	6074	tags=65%, list=32%, signal=95%
GO_REGULATION_OF_MITOCHONDRIAL_OUTER_MEMBRANE_PERMEABILIZATION_INVOLVED_IN_APOPTOTIC_SIGNALING_PATHWAY	GO_REGULATION_OF_MITOCHONDRIAL_OUTER_MEMBRANE_PERMEABILIZATION_INVOLVED_IN_APOPTOTIC_SIGNALING_PATHWAY		42	0.504814	1.61306	0.01875	0.0864203	1	5979	tags=67%, list=32%, signal=98%
GO_HYDROLASE_ACTIVITY_HYDROLYZING_N_GLYCOSYL_COMPOUNDS	GO_HYDROLASE_ACTIVITY_HYDROLYZING_N_GLYCOSYL_COMPOUNDS		22	0.537686	1.61113	0.0319829	0.0874267	1	4208	tags=55%, list=22%, signal=70%
GO_NUCLEAR_IMPORT	GO_NUCLEAR_IMPORT		126	0.406602	1.61059	0.030303	0.0875547	1	5481	tags=55%, list=29%, signal=77%
GO_PROTEIN_SERINE_THREONINE_PHOSPHATASE_ACTIVITY	GO_PROTEIN_SERINE_THREONINE_PHOSPHATASE_ACTIVITY		63	0.402735	1.60986	0.014433	0.0878752	1	4707	tags=46%, list=25%, signal=61%
GO_MICROTUBULE_ORGANIZING_CENTER_PART	GO_MICROTUBULE_ORGANIZING_CENTER_PART		134	0.418211	1.60973	0.0366599	0.0877995	1	4732	tags=44%, list=25%, signal=59%
GO_POLYSOME	GO_POLYSOME		38	0.510777	1.60931	0.0549898	0.0879237	1	6703	tags=68%, list=36%, signal=106%
GO_POSITIVE_REGULATION_OF_CELL_CYCLE_ARREST	GO_POSITIVE_REGULATION_OF_CELL_CYCLE_ARREST		80	0.4151	1.60881	0.019802	0.0880863	1	3441	tags=35%, list=18%, signal=43%
GO_OLIGOSACCHARIDE_LIPID_INTERMEDIATE_BIOSYNTHETIC_PROCESS	GO_OLIGOSACCHARIDE_LIPID_INTERMEDIATE_BIOSYNTHETIC_PROCESS		20	0.594297	1.60819	0.0350515	0.0883427	1	2294	tags=50%, list=12%, signal=57%
GO_REGULATION_OF_DNA_BIOSYNTHETIC_PROCESS	GO_REGULATION_OF_DNA_BIOSYNTHETIC_PROCESS		90	0.401693	1.60712	0.0206612	0.0888324	1	2281	tags=36%, list=12%, signal=40%
GO_REGULATION_OF_MITOPHAGY	GO_REGULATION_OF_MITOPHAGY		40	0.473729	1.60688	0.022449	0.0887966	1	4444	tags=52%, list=24%, signal=69%
GO_CELLULAR_RESPIRATION	GO_CELLULAR_RESPIRATION		136	0.549966	1.60671	0.06875	0.0887595	1	6136	tags=77%, list=33%, signal=114%
GO_GLYCERALDEHYDE_3_PHOSPHATE_METABOLIC_PROCESS	GO_GLYCERALDEHYDE_3_PHOSPHATE_METABOLIC_PROCESS		16	0.632876	1.6064	0.0446247	0.0887978	1	4200	tags=69%, list=22%, signal=89%
GO_NEGATIVE_REGULATION_OF_GENE_EXPRESSION_EPIGENETIC	GO_NEGATIVE_REGULATION_OF_GENE_EXPRESSION_EPIGENETIC		99	0.458316	1.60625	0.0530452	0.0887417	1	5674	tags=53%, list=30%, signal=75%
GO_FATTY_ACID_BETA_OXIDATION	GO_FATTY_ACID_BETA_OXIDATION		51	0.487962	1.60547	0.0544355	0.0890697	1	6180	tags=73%, list=33%, signal=108%
GO_CENTROSOME	GO_CENTROSOME		458	0.362841	1.60543	0.0323232	0.0889447	1	5052	tags=42%, list=27%, signal=56%
GO_DOUBLE_STRANDED_RNA_BINDING	GO_DOUBLE_STRANDED_RNA_BINDING		59	0.467591	1.60492	0.0406504	0.0890862	1	3660	tags=46%, list=20%, signal=57%
GO_MITOCHONDRIAL_PROTEIN_COMPLEX	GO_MITOCHONDRIAL_PROTEIN_COMPLEX		127	0.592311	1.60437	0.0740741	0.0892571	1	5406	tags=72%, list=29%, signal=101%
GO_CATION_SUGAR_SYMPORTER_ACTIVITY	GO_CATION_SUGAR_SYMPORTER_ACTIVITY		15	0.585939	1.60269	0.0439771	0.0901914	1	6057	tags=60%, list=32%, signal=89%
GO_PROTEIN_AUTOUBIQUITINATION	GO_PROTEIN_AUTOUBIQUITINATION		47	0.440368	1.59992	0.0241935	0.091898	1	6583	tags=60%, list=35%, signal=92%
GO_RNA_DEPENDENT_DNA_BIOSYNTHETIC_PROCESS	GO_RNA_DEPENDENT_DNA_BIOSYNTHETIC_PROCESS		20	0.546243	1.59921	0.028866	0.0921714	1	2855	tags=40%, list=15%, signal=47%
GO_REGULATION_OF_DNA_METHYLATION	GO_REGULATION_OF_DNA_METHYLATION		16	0.538778	1.5983	0.0294695	0.0926454	1	2596	tags=44%, list=14%, signal=51%
GO_MULTIVESICULAR_BODY_ORGANIZATION	GO_MULTIVESICULAR_BODY_ORGANIZATION		30	0.538482	1.5958	0.0534351	0.0941165	1	6237	tags=70%, list=33%, signal=105%
GO_RIBOSOMAL_LARGE_SUBUNIT_ASSEMBLY	GO_RIBOSOMAL_LARGE_SUBUNIT_ASSEMBLY		23	0.657263	1.59552	0.0502008	0.0941376	1	5315	tags=83%, list=28%, signal=115%
GO_COENZYME_A_METABOLIC_PROCESS	GO_COENZYME_A_METABOLIC_PROCESS		17	0.550037	1.59516	0.0272537	0.0941969	1	3736	tags=53%, list=20%, signal=66%
GO_POSITIVE_REGULATION_OF_MITOTIC_NUCLEAR_DIVISION	GO_POSITIVE_REGULATION_OF_MITOTIC_NUCLEAR_DIVISION		46	0.430916	1.5942	0.0339321	0.0946719	1	3662	tags=41%, list=20%, signal=51%
GO_MICROTUBULE_ORGANIZING_CENTER_ORGANIZATION	GO_MICROTUBULE_ORGANIZING_CENTER_ORGANIZATION		79	0.456514	1.59401	0.0696721	0.0946344	1	4756	tags=53%, list=25%, signal=71%
GO_MRNA_SPLICE_SITE_SELECTION	GO_MRNA_SPLICE_SITE_SELECTION		26	0.565186	1.59381	0.0477137	0.0946051	1	3464	tags=50%, list=19%, signal=61%
GO_RRNA_BINDING	GO_RRNA_BINDING		55	0.586885	1.59372	0.0644491	0.094483	1	6824	tags=85%, list=36%, signal=134%
GO_ORGANELLE_ENVELOPE_LUMEN	GO_ORGANELLE_ENVELOPE_LUMEN		73	0.480107	1.59356	0.0487805	0.094431	1	3715	tags=48%, list=20%, signal=60%
GO_ALPHA_AMINO_ACID_BIOSYNTHETIC_PROCESS	GO_ALPHA_AMINO_ACID_BIOSYNTHETIC_PROCESS		74	0.459232	1.59294	0.0292887	0.0947189	1	6854	tags=62%, list=37%, signal=98%
GO_PROTEIN_METHYLTRANSFERASE_ACTIVITY	GO_PROTEIN_METHYLTRANSFERASE_ACTIVITY		65	0.421511	1.59224	0.0491803	0.0950099	1	5951	tags=57%, list=32%, signal=83%
GO_DNA_REPLICATION_DEPENDENT_NUCLEOSOME_ORGANIZATION	GO_DNA_REPLICATION_DEPENDENT_NUCLEOSOME_ORGANIZATION		32	0.613416	1.59147	0.0758197	0.095335	1	5884	tags=72%, list=31%, signal=105%
GO_ORGANELLAR_LARGE_RIBOSOMAL_SUBUNIT	GO_ORGANELLAR_LARGE_RIBOSOMAL_SUBUNIT		30	0.659597	1.59042	0.0538302	0.0959132	1	3971	tags=77%, list=21%, signal=97%
GO_REGULATION_OF_ENDOPLASMIC_RETICULUM_UNFOLDED_PROTEIN_RESPONSE	GO_REGULATION_OF_ENDOPLASMIC_RETICULUM_UNFOLDED_PROTEIN_RESPONSE		25	0.518533	1.59028	0.0297619	0.0958582	1	6583	tags=60%, list=35%, signal=92%
GO_RIBONUCLEOSIDE_DIPHOSPHATE_METABOLIC_PROCESS	GO_RIBONUCLEOSIDE_DIPHOSPHATE_METABOLIC_PROCESS		61	0.436558	1.58994	0.0362903	0.0959262	1	3457	tags=38%, list=18%, signal=46%
GO_POSITIVE_REGULATION_OF_PROTEOLYSIS	GO_POSITIVE_REGULATION_OF_PROTEOLYSIS		352	0.359798	1.58854	0.0181818	0.0966368	1	3150	tags=34%, list=17%, signal=40%
GO_THIOESTER_BIOSYNTHETIC_PROCESS	GO_THIOESTER_BIOSYNTHETIC_PROCESS		48	0.451394	1.58843	0.028866	0.0965381	1	4701	tags=44%, list=25%, signal=58%
GO_TRANSLATION_PREINITIATION_COMPLEX	GO_TRANSLATION_PREINITIATION_COMPLEX		16	0.672897	1.58835	0.0498915	0.0964155	1	5588	tags=88%, list=30%, signal=125%
GO_CARBOHYDRATE_CATABOLIC_PROCESS	GO_CARBOHYDRATE_CATABOLIC_PROCESS		106	0.398991	1.58729	0.0239521	0.0969676	1	4314	tags=38%, list=23%, signal=49%
GO_CYTOPLASMIC_TRANSLATION	GO_CYTOPLASMIC_TRANSLATION		40	0.62141	1.58612	0.0672098	0.0975398	1	6170	tags=93%, list=33%, signal=138%
GO_CARBOHYDRATE_KINASE_ACTIVITY	GO_CARBOHYDRATE_KINASE_ACTIVITY		19	0.544809	1.58566	0.0296443	0.0976892	1	4200	tags=53%, list=22%, signal=68%
GO_VOLTAGE_GATED_ANION_CHANNEL_ACTIVITY	GO_VOLTAGE_GATED_ANION_CHANNEL_ACTIVITY		17	0.544803	1.58513	0.0327198	0.0979108	1	4610	tags=47%, list=25%, signal=62%
GO_CHROMATIN_DNA_BINDING	GO_CHROMATIN_DNA_BINDING		78	0.415288	1.58452	0.0346154	0.0981851	1	4933	tags=40%, list=26%, signal=54%
GO_SPLICEOSOMAL_TRI_SNRNP_COMPLEX	GO_SPLICEOSOMAL_TRI_SNRNP_COMPLEX		26	0.624708	1.5845	0.0527383	0.0980382	1	4308	tags=81%, list=23%, signal=105%
GO_REGULATION_OF_PROTEIN_CATABOLIC_PROCESS	GO_REGULATION_OF_PROTEIN_CATABOLIC_PROCESS		377	0.3608	1.58407	0.0223124	0.0981946	1	4567	tags=42%, list=24%, signal=54%
GO_RIBONUCLEOSIDE_TRIPHOSPHATE_BIOSYNTHETIC_PROCESS	GO_RIBONUCLEOSIDE_TRIPHOSPHATE_BIOSYNTHETIC_PROCESS		44	0.523137	1.58268	0.0671937	0.0989736	1	5400	tags=61%, list=29%, signal=86%
GO_TRANSCRIPTION_ELONGATION_FACTOR_COMPLEX	GO_TRANSCRIPTION_ELONGATION_FACTOR_COMPLEX		36	0.489947	1.58247	0.0408998	0.0989419	1	4296	tags=47%, list=23%, signal=61%
GO_S_ADENOSYLMETHIONINE_DEPENDENT_METHYLTRANSFERASE_ACTIVITY	GO_S_ADENOSYLMETHIONINE_DEPENDENT_METHYLTRANSFERASE_ACTIVITY		113	0.405669	1.58244	0.0597015	0.098801	1	3908	tags=43%, list=21%, signal=54%
GO_TRANSFERASE_ACTIVITY_TRANSFERRING_NITROGENOUS_GROUPS	GO_TRANSFERASE_ACTIVITY_TRANSFERRING_NITROGENOUS_GROUPS		19	0.527345	1.58242	0.0298211	0.0986472	1	2009	tags=32%, list=11%, signal=35%
GO_MICROBODY	GO_MICROBODY		126	0.399489	1.58216	0.0348361	0.0986646	1	6204	tags=56%, list=33%, signal=83%
GO_NEGATIVE_REGULATION_OF_CELL_CYCLE_G1_S_PHASE_TRANSITION	GO_NEGATIVE_REGULATION_OF_CELL_CYCLE_G1_S_PHASE_TRANSITION		92	0.402252	1.58072	0.0334646	0.0994921	1	3441	tags=37%, list=18%, signal=45%
GO_POSITIVE_REGULATION_OF_PROTEIN_CATABOLIC_PROCESS	GO_POSITIVE_REGULATION_OF_PROTEIN_CATABOLIC_PROCESS		254	0.374234	1.58061	0.0323887	0.0994103	1	5075	tags=47%, list=27%, signal=64%
GO__DE_NOVO_PROTEIN_FOLDING	GO__DE_NOVO_PROTEIN_FOLDING		17	0.609533	1.57981	0.04158	0.0998086	1	6784	tags=88%, list=36%, signal=138%
GO_CENTROSOME_CYCLE	GO_CENTROSOME_CYCLE		44	0.515392	1.57932	0.0626263	0.0999943	1	4994	tags=64%, list=27%, signal=87%
GO_ORGANIC_CYCLIC_COMPOUND_CATABOLIC_PROCESS	GO_ORGANIC_CYCLIC_COMPOUND_CATABOLIC_PROCESS		411	0.393043	1.57905	0.0566802	0.100008	1	5731	tags=49%, list=31%, signal=69%
GO_REGULATION_OF_SPINDLE_ORGANIZATION	GO_REGULATION_OF_SPINDLE_ORGANIZATION		19	0.55058	1.57892	0.0502008	0.0999326	1	5148	tags=68%, list=28%, signal=94%
GO_U2_TYPE_PRESPLICEOSOME	GO_U2_TYPE_PRESPLICEOSOME		16	0.611441	1.5789	0.0371134	0.0997777	1	3897	tags=69%, list=21%, signal=87%
GO_MITOTIC_G2_M_TRANSITION_CHECKPOINT	GO_MITOTIC_G2_M_TRANSITION_CHECKPOINT		17	0.548372	1.57851	0.05074	0.0998945	1	2722	tags=47%, list=15%, signal=55%
GO_NEGATIVE_REGULATION_OF_VIRAL_TRANSCRIPTION	GO_NEGATIVE_REGULATION_OF_VIRAL_TRANSCRIPTION		24	0.488421	1.57842	0.022	0.0997939	1	1107	tags=25%, list=6%, signal=27%
GO_UBIQUITIN_LIKE_PROTEIN_LIGASE_BINDING	GO_UBIQUITIN_LIKE_PROTEIN_LIGASE_BINDING		256	0.361634	1.57719	0.0203252	0.100447	1	5268	tags=46%, list=28%, signal=63%
GO_RNA_POLYMERASE_II_CARBOXY_TERMINAL_DOMAIN_KINASE_ACTIVITY	GO_RNA_POLYMERASE_II_CARBOXY_TERMINAL_DOMAIN_KINASE_ACTIVITY		16	0.610604	1.577	0.0425963	0.100386	1	5258	tags=75%, list=28%, signal=104%
GO_NUCLEOTIDE_TRANSPORT	GO_NUCLEOTIDE_TRANSPORT		25	0.487796	1.57683	0.0214844	0.100333	1	4806	tags=56%, list=26%, signal=75%
GO_S_ACYLTRANSFERASE_ACTIVITY	GO_S_ACYLTRANSFERASE_ACTIVITY		29	0.475469	1.57679	0.028	0.10019	1	4411	tags=55%, list=24%, signal=72%
GO_ATP_DEPENDENT_MICROTUBULE_MOTOR_ACTIVITY	GO_ATP_DEPENDENT_MICROTUBULE_MOTOR_ACTIVITY		18	0.586154	1.57658	0.0587084	0.100184	1	482	tags=33%, list=3%, signal=34%
GO_NUCLEAR_CHROMATIN	GO_NUCLEAR_CHROMATIN		280	0.377231	1.57522	0.0279441	0.100998	1	6008	tags=50%, list=32%, signal=73%
GO_REGULATION_OF_INTRINSIC_APOPTOTIC_SIGNALING_PATHWAY_BY_P53_CLASS_MEDIATOR	GO_REGULATION_OF_INTRINSIC_APOPTOTIC_SIGNALING_PATHWAY_BY_P53_CLASS_MEDIATOR		21	0.538834	1.57462	0.0530452	0.101197	1	4439	tags=52%, list=24%, signal=69%
GO_MITOCHONDRIAL_FUSION	GO_MITOCHONDRIAL_FUSION		15	0.580708	1.57353	0.050813	0.10178	1	6468	tags=73%, list=35%, signal=112%
GO_OXIDOREDUCTASE_COMPLEX	GO_OXIDOREDUCTASE_COMPLEX		91	0.537552	1.57267	0.0695296	0.102191	1	6252	tags=71%, list=33%, signal=107%
GO_POSTTRANSCRIPTIONAL_GENE_SILENCING	GO_POSTTRANSCRIPTIONAL_GENE_SILENCING		37	0.473946	1.57227	0.0554415	0.102268	1	4646	tags=49%, list=25%, signal=65%
GO_PROTEIN_TARGETING	GO_PROTEIN_TARGETING		392	0.379454	1.57218	0.0662768	0.102175	1	6506	tags=59%, list=35%, signal=89%
GO_CARBOHYDRATE_DERIVATIVE_TRANSPORTER_ACTIVITY	GO_CARBOHYDRATE_DERIVATIVE_TRANSPORTER_ACTIVITY		34	0.472296	1.57102	0.042885	0.102825	1	4806	tags=53%, list=26%, signal=71%
GO_REGULATION_OF_RESPONSE_TO_DNA_DAMAGE_STIMULUS	GO_REGULATION_OF_RESPONSE_TO_DNA_DAMAGE_STIMULUS		134	0.3857	1.57005	0.0433925	0.103323	1	5368	tags=49%, list=29%, signal=69%
GO_PROTEIN_COMPLEX_LOCALIZATION	GO_PROTEIN_COMPLEX_LOCALIZATION		50	0.424986	1.5694	0.0329897	0.103593	1	4614	tags=42%, list=25%, signal=56%
GO_NEGATIVE_REGULATION_OF_TELOMERE_MAINTENANCE	GO_NEGATIVE_REGULATION_OF_TELOMERE_MAINTENANCE		26	0.515689	1.56925	0.0569106	0.103505	1	3140	tags=42%, list=17%, signal=51%
GO_PYRIMIDINE_NUCLEOSIDE_METABOLIC_PROCESS	GO_PYRIMIDINE_NUCLEOSIDE_METABOLIC_PROCESS		45	0.439544	1.56904	0.0440882	0.103479	1	4532	tags=40%, list=24%, signal=53%
GO_CYTOPLASMIC_STRESS_GRANULE	GO_CYTOPLASMIC_STRESS_GRANULE		31	0.493671	1.56878	0.0585938	0.103486	1	6316	tags=68%, list=34%, signal=102%
GO_TRANSLATIONAL_INITIATION	GO_TRANSLATIONAL_INITIATION		143	0.586974	1.56845	0.101215	0.103532	1	6824	tags=87%, list=36%, signal=135%
GO_REGULATION_OF_ALTERNATIVE_MRNA_SPLICING_VIA_SPLICEOSOME	GO_REGULATION_OF_ALTERNATIVE_MRNA_SPLICING_VIA_SPLICEOSOME		34	0.480943	1.56754	0.0499002	0.103978	1	3480	tags=44%, list=19%, signal=54%
GO_RESPONSE_TO_IONIZING_RADIATION	GO_RESPONSE_TO_IONIZING_RADIATION		137	0.378947	1.56573	0.0461847	0.105092	1	4896	tags=45%, list=26%, signal=61%
GO_NUCLEOSIDE_BISPHOSPHATE_METABOLIC_PROCESS	GO_NUCLEOSIDE_BISPHOSPHATE_METABOLIC_PROCESS		37	0.455385	1.5645	0.0288066	0.105769	1	5124	tags=46%, list=27%, signal=63%
GO_HYDRO_LYASE_ACTIVITY	GO_HYDRO_LYASE_ACTIVITY		43	0.467926	1.56441	0.0325866	0.105653	1	5021	tags=47%, list=27%, signal=63%
GO_PROTEIN_ALKYLATION	GO_PROTEIN_ALKYLATION		98	0.389739	1.56428	0.039604	0.105573	1	5182	tags=47%, list=28%, signal=65%
GO_POSITIVE_REGULATION_OF_DNA_REPAIR	GO_POSITIVE_REGULATION_OF_DNA_REPAIR		33	0.488068	1.56278	0.0490405	0.106453	1	4662	tags=61%, list=25%, signal=81%
GO_REGULATION_OF_EXOSOMAL_SECRETION	GO_REGULATION_OF_EXOSOMAL_SECRETION		17	0.590612	1.56216	0.0514851	0.106728	1	6074	tags=71%, list=32%, signal=104%
GO_HISTONE_H2A_UBIQUITINATION	GO_HISTONE_H2A_UBIQUITINATION		16	0.568031	1.56207	0.0380762	0.106637	1	5368	tags=63%, list=29%, signal=88%
GO_MULTI_ORGANISM_ORGANELLE_ORGANIZATION	GO_MULTI_ORGANISM_ORGANELLE_ORGANIZATION		23	0.536258	1.56127	0.0554455	0.107049	1	6717	tags=74%, list=36%, signal=115%
GO_DEOXYRIBONUCLEOSIDE_TRIPHOSPHATE_METABOLIC_PROCESS	GO_DEOXYRIBONUCLEOSIDE_TRIPHOSPHATE_METABOLIC_PROCESS		16	0.617143	1.56067	0.0564854	0.107286	1	3822	tags=63%, list=20%, signal=78%
GO_NUCLEAR_ENVELOPE_REASSEMBLY	GO_NUCLEAR_ENVELOPE_REASSEMBLY		17	0.571368	1.56051	0.0527383	0.107227	1	6074	tags=76%, list=32%, signal=113%
GO_EPITHELIAL_CELL_APOPTOTIC_PROCESS	GO_EPITHELIAL_CELL_APOPTOTIC_PROCESS		25	0.472273	1.56018	0.0374016	0.107312	1	1568	tags=36%, list=8%, signal=39%
GO_HISTONE_MONOUBIQUITINATION	GO_HISTONE_MONOUBIQUITINATION		23	0.524889	1.56001	0.0433925	0.10726	1	6515	tags=61%, list=35%, signal=93%
GO_PYRIDOXAL_PHOSPHATE_BINDING	GO_PYRIDOXAL_PHOSPHATE_BINDING		44	0.432683	1.55997	0.0158103	0.107124	1	2720	tags=32%, list=15%, signal=37%
GO_KETONE_BIOSYNTHETIC_PROCESS	GO_KETONE_BIOSYNTHETIC_PROCESS		23	0.527716	1.55993	0.0567227	0.106988	1	3451	tags=48%, list=18%, signal=59%
GO_NUCLEAR_MEMBRANE	GO_NUCLEAR_MEMBRANE		256	0.340542	1.55963	0.0411765	0.107033	1	4742	tags=43%, list=25%, signal=56%
GO_FOUR_WAY_JUNCTION_DNA_BINDING	GO_FOUR_WAY_JUNCTION_DNA_BINDING		15	0.659164	1.55947	0.0559006	0.10697	1	3762	tags=73%, list=20%, signal=92%
GO_INTRINSIC_COMPONENT_OF_MITOCHONDRIAL_MEMBRANE	GO_INTRINSIC_COMPONENT_OF_MITOCHONDRIAL_MEMBRANE		43	0.498888	1.55937	0.0576923	0.106861	1	3596	tags=49%, list=19%, signal=60%
GO_SITE_OF_DOUBLE_STRAND_BREAK	GO_SITE_OF_DOUBLE_STRAND_BREAK		28	0.503094	1.55898	0.0669371	0.106969	1	6068	tags=68%, list=32%, signal=100%
GO_ESTABLISHMENT_OF_MITOTIC_SPINDLE_LOCALIZATION	GO_ESTABLISHMENT_OF_MITOTIC_SPINDLE_LOCALIZATION		23	0.528775	1.5586	0.0497925	0.107063	1	1780	tags=39%, list=10%, signal=43%
GO_SOLUTE_PROTON_SYMPORTER_ACTIVITY	GO_SOLUTE_PROTON_SYMPORTER_ACTIVITY		26	0.48537	1.55854	0.0261044	0.10694	1	6200	tags=46%, list=33%, signal=69%
GO_EUCHROMATIN	GO_EUCHROMATIN		30	0.48669	1.55823	0.0448065	0.107012	1	6912	tags=60%, list=37%, signal=95%
GO_REGULATION_OF_TELOMERASE_ACTIVITY	GO_REGULATION_OF_TELOMERASE_ACTIVITY		41	0.431735	1.55819	0.0397614	0.10688	1	1914	tags=32%, list=10%, signal=35%
GO_SPINDLE_LOCALIZATION	GO_SPINDLE_LOCALIZATION		36	0.480371	1.55672	0.0633947	0.107798	1	1780	tags=36%, list=10%, signal=40%
GO_POSITIVE_REGULATION_OF_CELL_CYCLE	GO_POSITIVE_REGULATION_OF_CELL_CYCLE		310	0.347164	1.55638	0.012685	0.107849	1	3903	tags=34%, list=21%, signal=42%
GO_DNA_DIRECTED_RNA_POLYMERASE_II_CORE_COMPLEX	GO_DNA_DIRECTED_RNA_POLYMERASE_II_CORE_COMPLEX		16	0.575341	1.55599	0.0555556	0.107934	1	4082	tags=56%, list=22%, signal=72%
GO_FC_EPSILON_RECEPTOR_SIGNALING_PATHWAY	GO_FC_EPSILON_RECEPTOR_SIGNALING_PATHWAY		124	0.41383	1.55463	0.0628684	0.108707	1	4342	tags=44%, list=23%, signal=57%
GO_GLYCINE_METABOLIC_PROCESS	GO_GLYCINE_METABOLIC_PROCESS		15	0.570554	1.55448	0.048218	0.108638	1	2005	tags=40%, list=11%, signal=45%
GO_HISTONE_KINASE_ACTIVITY	GO_HISTONE_KINASE_ACTIVITY		18	0.550403	1.55442	0.0576132	0.108533	1	2813	tags=56%, list=15%, signal=65%
GO_POSITIVE_REGULATION_OF_VIRAL_RELEASE_FROM_HOST_CELL	GO_POSITIVE_REGULATION_OF_VIRAL_RELEASE_FROM_HOST_CELL		15	0.589119	1.55401	0.059761	0.108678	1	6074	tags=73%, list=32%, signal=108%
GO_NITROGEN_COMPOUND_TRANSPORT	GO_NITROGEN_COMPOUND_TRANSPORT		482	0.321399	1.55378	0.00584795	0.108676	1	5011	tags=37%, list=27%, signal=49%
GO_SOMATIC_RECOMBINATION_OF_IMMUNOGLOBULIN_GENE_SEGMENTS	GO_SOMATIC_RECOMBINATION_OF_IMMUNOGLOBULIN_GENE_SEGMENTS		21	0.546216	1.55355	0.0576541	0.108659	1	5368	tags=62%, list=29%, signal=87%
GO_REGULATION_OF_CELL_CYCLE_G1_S_PHASE_TRANSITION	GO_REGULATION_OF_CELL_CYCLE_G1_S_PHASE_TRANSITION		140	0.367022	1.55287	0.0314342	0.109022	1	3441	tags=36%, list=18%, signal=43%
GO_PRECATALYTIC_SPLICEOSOME	GO_PRECATALYTIC_SPLICEOSOME		21	0.645254	1.55193	0.0566038	0.109495	1	4126	tags=71%, list=22%, signal=92%
GO_PEROXISOME_ORGANIZATION	GO_PEROXISOME_ORGANIZATION		33	0.491345	1.55185	0.0496032	0.109378	1	6204	tags=67%, list=33%, signal=100%
GO_HISTONE_UBIQUITINATION	GO_HISTONE_UBIQUITINATION		34	0.489104	1.55156	0.063655	0.109428	1	5368	tags=56%, list=29%, signal=78%
GO_NEGATIVE_REGULATION_OF_PROTEIN_CATABOLIC_PROCESS	GO_NEGATIVE_REGULATION_OF_PROTEIN_CATABOLIC_PROCESS		103	0.376972	1.55149	0.0246914	0.109312	1	4370	tags=40%, list=23%, signal=52%
GO_SMALL_MOLECULE_CATABOLIC_PROCESS	GO_SMALL_MOLECULE_CATABOLIC_PROCESS		313	0.358294	1.54962	0.0300601	0.110504	1	5797	tags=43%, list=31%, signal=61%
GO_HISTONE_METHYLATION	GO_HISTONE_METHYLATION		73	0.409642	1.54911	0.0537849	0.110717	1	2923	tags=34%, list=16%, signal=40%
GO_ALPHA_AMINO_ACID_METABOLIC_PROCESS	GO_ALPHA_AMINO_ACID_METABOLIC_PROCESS		215	0.364607	1.54888	0.0347648	0.110716	1	4616	tags=40%, list=25%, signal=52%
GO_PEPTIDYL_LYSINE_TRIMETHYLATION	GO_PEPTIDYL_LYSINE_TRIMETHYLATION		18	0.551547	1.5488	0.064833	0.110594	1	4791	tags=56%, list=26%, signal=75%
GO_CENTRIOLE	GO_CENTRIOLE		92	0.42029	1.54839	0.054	0.110739	1	4732	tags=43%, list=25%, signal=58%
GO_PROTEIN_IMPORT	GO_PROTEIN_IMPORT		150	0.37352	1.54704	0.045082	0.111532	1	5481	tags=50%, list=29%, signal=70%
GO_SINGLE_STRANDED_RNA_BINDING	GO_SINGLE_STRANDED_RNA_BINDING		63	0.433474	1.54695	0.058	0.111427	1	2700	tags=38%, list=14%, signal=44%
GO_ADENYLYLTRANSFERASE_ACTIVITY	GO_ADENYLYLTRANSFERASE_ACTIVITY		24	0.491963	1.54672	0.0407332	0.111422	1	2938	tags=38%, list=16%, signal=44%
GO_ERROR_PRONE_TRANSLESION_SYNTHESIS	GO_ERROR_PRONE_TRANSLESION_SYNTHESIS		19	0.575115	1.54584	0.0595483	0.111919	1	4347	tags=63%, list=23%, signal=82%
GO_RIBOSOMAL_SUBUNIT	GO_RIBOSOMAL_SUBUNIT		156	0.598675	1.54582	0.115385	0.111761	1	6728	tags=85%, list=36%, signal=132%
GO_MITOCHONDRIAL_MEMBRANE_PART	GO_MITOCHONDRIAL_MEMBRANE_PART		157	0.529071	1.54489	0.0840164	0.112267	1	5406	tags=67%, list=29%, signal=93%
GO_REPRESSING_TRANSCRIPTION_FACTOR_BINDING	GO_REPRESSING_TRANSCRIPTION_FACTOR_BINDING		57	0.401149	1.54424	0.0583658	0.112561	1	4916	tags=44%, list=26%, signal=59%
GO_DNA_METHYLATION_OR_DEMETHYLATION	GO_DNA_METHYLATION_OR_DEMETHYLATION		57	0.420808	1.54347	0.0365854	0.112944	1	3060	tags=28%, list=16%, signal=33%
GO_CHROMOSOME_ORGANIZATION_INVOLVED_IN_MEIOTIC_CELL_CYCLE	GO_CHROMOSOME_ORGANIZATION_INVOLVED_IN_MEIOTIC_CELL_CYCLE		42	0.455068	1.54342	0.0465116	0.112816	1	4142	tags=33%, list=22%, signal=43%
GO_UBIQUITIN_DEPENDENT_PROTEIN_CATABOLIC_PROCESS_VIA_THE_MULTIVESICULAR_BODY_SORTING_PATHWAY	GO_UBIQUITIN_DEPENDENT_PROTEIN_CATABOLIC_PROCESS_VIA_THE_MULTIVESICULAR_BODY_SORTING_PATHWAY		16	0.54683	1.5415	0.0704225	0.113994	1	5222	tags=69%, list=28%, signal=95%
GO_RNA_POLYMERASE_II_REPRESSING_TRANSCRIPTION_FACTOR_BINDING	GO_RNA_POLYMERASE_II_REPRESSING_TRANSCRIPTION_FACTOR_BINDING		27	0.475551	1.54111	0.054326	0.114112	1	4916	tags=44%, list=26%, signal=60%
GO_DNA_TEMPLATED_TRANSCRIPTION_INITIATION	GO_DNA_TEMPLATED_TRANSCRIPTION_INITIATION		200	0.339336	1.54065	0.019305	0.114275	1	5575	tags=50%, list=30%, signal=70%
GO_ENDOSOME_ORGANIZATION	GO_ENDOSOME_ORGANIZATION		59	0.446831	1.5396	0.0452756	0.11485	1	6237	tags=56%, list=33%, signal=84%
GO_POSITIVE_REGULATION_OF_HISTONE_METHYLATION	GO_POSITIVE_REGULATION_OF_HISTONE_METHYLATION		29	0.493598	1.53907	0.0663984	0.11505	1	4296	tags=45%, list=23%, signal=58%
GO_MITOCHONDRIAL_RESPIRATORY_CHAIN_COMPLEX_ASSEMBLY	GO_MITOCHONDRIAL_RESPIRATORY_CHAIN_COMPLEX_ASSEMBLY		63	0.606828	1.53824	0.0916497	0.115481	1	6755	tags=90%, list=36%, signal=141%
GO_SMN_SM_PROTEIN_COMPLEX	GO_SMN_SM_PROTEIN_COMPLEX		17	0.690152	1.53797	0.0486258	0.115524	1	4953	tags=88%, list=26%, signal=120%
GO_PROTEIN_MODIFICATION_BY_SMALL_PROTEIN_REMOVAL	GO_PROTEIN_MODIFICATION_BY_SMALL_PROTEIN_REMOVAL		112	0.400837	1.53779	0.0372549	0.115481	1	5542	tags=50%, list=30%, signal=71%
GO_THYROID_HORMONE_RECEPTOR_BINDING	GO_THYROID_HORMONE_RECEPTOR_BINDING		30	0.476964	1.53723	0.0559846	0.115733	1	5947	tags=63%, list=32%, signal=93%
GO_ALDITOL_METABOLIC_PROCESS	GO_ALDITOL_METABOLIC_PROCESS		18	0.558044	1.5372	0.0562771	0.115588	1	5900	tags=72%, list=32%, signal=105%
GO_PROTEIN_POLYUBIQUITINATION	GO_PROTEIN_POLYUBIQUITINATION		236	0.372599	1.53537	0.0456432	0.116831	1	6786	tags=64%, list=36%, signal=98%
GO_REGULATION_OF_DNA_TEMPLATED_TRANSCRIPTION_ELONGATION	GO_REGULATION_OF_DNA_TEMPLATED_TRANSCRIPTION_ELONGATION		37	0.465286	1.53365	0.0386179	0.11791	1	5368	tags=54%, list=29%, signal=76%
GO_CELLULAR_RESPONSE_TO_LIGHT_STIMULUS	GO_CELLULAR_RESPONSE_TO_LIGHT_STIMULUS		87	0.356837	1.53267	0.0261044	0.118458	1	4980	tags=40%, list=27%, signal=55%
GO_GPI_ANCHOR_METABOLIC_PROCESS	GO_GPI_ANCHOR_METABOLIC_PROCESS		32	0.499387	1.53251	0.0561331	0.118405	1	4550	tags=50%, list=24%, signal=66%
GO_MICROBODY_PART	GO_MICROBODY_PART		92	0.408113	1.53168	0.0476191	0.118856	1	6204	tags=54%, list=33%, signal=81%
GO_HSP70_PROTEIN_BINDING	GO_HSP70_PROTEIN_BINDING		28	0.470474	1.53146	0.0389344	0.118845	1	3393	tags=39%, list=18%, signal=48%
GO_ISOMERASE_ACTIVITY	GO_ISOMERASE_ACTIVITY		150	0.385445	1.53146	0.0322581	0.118673	1	5914	tags=50%, list=32%, signal=73%
GO_LIPID_OXIDATION	GO_LIPID_OXIDATION		70	0.437478	1.53134	0.0661323	0.118595	1	6180	tags=63%, list=33%, signal=94%
GO_CELLULAR_PROTEIN_COMPLEX_ASSEMBLY	GO_CELLULAR_PROTEIN_COMPLEX_ASSEMBLY		315	0.355593	1.53131	0.0285132	0.118452	1	5787	tags=50%, list=31%, signal=71%
GO_SOMATIC_DIVERSIFICATION_OF_IMMUNE_RECEPTORS	GO_SOMATIC_DIVERSIFICATION_OF_IMMUNE_RECEPTORS		38	0.494598	1.53118	0.0626263	0.11837	1	5368	tags=58%, list=29%, signal=81%
GO_PROTEIN_HETEROTETRAMERIZATION	GO_PROTEIN_HETEROTETRAMERIZATION		37	0.531355	1.53117	0.1	0.118212	1	5884	tags=62%, list=31%, signal=91%
GO_PROTEIN_ACYLATION	GO_PROTEIN_ACYLATION		142	0.370108	1.53062	0.0354331	0.118439	1	5552	tags=45%, list=30%, signal=64%
GO_RNA_SPLICING_VIA_ENDONUCLEOLYTIC_CLEAVAGE_AND_LIGATION	GO_RNA_SPLICING_VIA_ENDONUCLEOLYTIC_CLEAVAGE_AND_LIGATION		15	0.58165	1.53016	0.0673469	0.118654	1	6842	tags=80%, list=37%, signal=126%
GO_POSITIVE_REGULATION_OF_DNA_TEMPLATED_TRANSCRIPTION_ELONGATION	GO_POSITIVE_REGULATION_OF_DNA_TEMPLATED_TRANSCRIPTION_ELONGATION		21	0.525142	1.52871	0.0573123	0.11956	1	7767	tags=76%, list=42%, signal=130%
GO_MEIOSIS_I	GO_MEIOSIS_I		75	0.430245	1.52859	0.0677618	0.11946	1	4142	tags=37%, list=22%, signal=48%
GO_U1_SNRNP	GO_U1_SNRNP		17	0.659999	1.52854	0.0527426	0.119325	1	3304	tags=71%, list=18%, signal=86%
GO_MAGNESIUM_ION_BINDING	GO_MAGNESIUM_ION_BINDING		189	0.336132	1.52766	0.0240964	0.119793	1	3976	tags=36%, list=21%, signal=45%
GO_U5_SNRNP	GO_U5_SNRNP		16	0.598372	1.52707	0.0668016	0.120066	1	5434	tags=94%, list=29%, signal=132%
GO_U2_SNRNP	GO_U2_SNRNP		18	0.60406	1.52539	0.0588235	0.121102	1	3897	tags=78%, list=21%, signal=98%
GO_PURINE_CONTAINING_COMPOUND_SALVAGE	GO_PURINE_CONTAINING_COMPOUND_SALVAGE		15	0.534156	1.52418	0.056338	0.121789	1	3582	tags=53%, list=19%, signal=66%
GO_ESCRT_COMPLEX	GO_ESCRT_COMPLEX		24	0.530657	1.52361	0.0601504	0.12206	1	6717	tags=71%, list=36%, signal=110%
GO_CARBOHYDRATE_DERIVATIVE_TRANSPORT	GO_CARBOHYDRATE_DERIVATIVE_TRANSPORT		48	0.437237	1.52278	0.0528376	0.122502	1	4806	tags=46%, list=26%, signal=62%
GO_POSITIVE_REGULATION_OF_CELL_CYCLE_PHASE_TRANSITION	GO_POSITIVE_REGULATION_OF_CELL_CYCLE_PHASE_TRANSITION		66	0.407008	1.52265	0.0298805	0.122445	1	3556	tags=41%, list=19%, signal=50%
GO_NUCLEOSIDE_BISPHOSPHATE_BIOSYNTHETIC_PROCESS	GO_NUCLEOSIDE_BISPHOSPHATE_BIOSYNTHETIC_PROCESS		17	0.51286	1.52253	0.0462777	0.122344	1	5124	tags=65%, list=27%, signal=89%
GO_FATTY_ACID_BETA_OXIDATION_USING_ACYL_COA_DEHYDROGENASE	GO_FATTY_ACID_BETA_OXIDATION_USING_ACYL_COA_DEHYDROGENASE		18	0.541867	1.52202	0.109091	0.12257	1	5797	tags=72%, list=31%, signal=105%
GO_NEGATIVE_REGULATION_OF_INTRINSIC_APOPTOTIC_SIGNALING_PATHWAY_BY_P53_CLASS_MEDIATOR	GO_NEGATIVE_REGULATION_OF_INTRINSIC_APOPTOTIC_SIGNALING_PATHWAY_BY_P53_CLASS_MEDIATOR		17	0.535077	1.52137	0.0707269	0.122881	1	4439	tags=53%, list=24%, signal=69%
GO_ENERGY_COUPLED_PROTON_TRANSPORT_DOWN_ELECTROCHEMICAL_GRADIENT	GO_ENERGY_COUPLED_PROTON_TRANSPORT_DOWN_ELECTROCHEMICAL_GRADIENT		23	0.614466	1.52124	0.0943026	0.122809	1	5800	tags=74%, list=31%, signal=107%
GO_CYTOCHROME_COMPLEX	GO_CYTOCHROME_COMPLEX		20	0.602359	1.52032	0.0595483	0.123377	1	2776	tags=55%, list=15%, signal=65%
GO_LARGE_RIBOSOMAL_SUBUNIT	GO_LARGE_RIBOSOMAL_SUBUNIT		90	0.604052	1.52021	0.12	0.123279	1	6991	tags=91%, list=37%, signal=145%
GO_PROTEIN_EXIT_FROM_ENDOPLASMIC_RETICULUM	GO_PROTEIN_EXIT_FROM_ENDOPLASMIC_RETICULUM		18	0.595378	1.51958	0.0694445	0.123598	1	4897	tags=61%, list=26%, signal=83%
GO_NEGATIVE_REGULATION_OF_CYTOSKELETON_ORGANIZATION	GO_NEGATIVE_REGULATION_OF_CYTOSKELETON_ORGANIZATION		206	0.34408	1.51821	0.0415842	0.12447	1	4276	tags=43%, list=23%, signal=55%
GO_REGULATION_OF_ARP2_3_COMPLEX_MEDIATED_ACTIN_NUCLEATION	GO_REGULATION_OF_ARP2_3_COMPLEX_MEDIATED_ACTIN_NUCLEATION		15	0.538209	1.51798	0.0714286	0.124467	1	3411	tags=53%, list=18%, signal=65%
GO_INTRINSIC_APOPTOTIC_SIGNALING_PATHWAY_IN_RESPONSE_TO_ENDOPLASMIC_RETICULUM_STRESS	GO_INTRINSIC_APOPTOTIC_SIGNALING_PATHWAY_IN_RESPONSE_TO_ENDOPLASMIC_RETICULUM_STRESS		28	0.477313	1.51777	0.0457256	0.124439	1	5110	tags=61%, list=27%, signal=83%
GO_MISFOLDED_OR_INCOMPLETELY_SYNTHESIZED_PROTEIN_CATABOLIC_PROCESS	GO_MISFOLDED_OR_INCOMPLETELY_SYNTHESIZED_PROTEIN_CATABOLIC_PROCESS		15	0.538449	1.51743	0.0766129	0.124532	1	7274	tags=93%, list=39%, signal=153%
GO_SMALL_RIBOSOMAL_SUBUNIT	GO_SMALL_RIBOSOMAL_SUBUNIT		66	0.599299	1.51527	0.115702	0.126068	1	5731	tags=74%, list=31%, signal=107%
GO_WATER_SOLUBLE_VITAMIN_METABOLIC_PROCESS	GO_WATER_SOLUBLE_VITAMIN_METABOLIC_PROCESS		83	0.424794	1.51325	0.0382409	0.12748	1	3301	tags=37%, list=18%, signal=45%
GO_CELL_DIFFERENTIATION_INVOLVED_IN_EMBRYONIC_PLACENTA_DEVELOPMENT	GO_CELL_DIFFERENTIATION_INVOLVED_IN_EMBRYONIC_PLACENTA_DEVELOPMENT		25	0.494529	1.51322	0.0507099	0.127334	1	4138	tags=48%, list=22%, signal=62%
GO_GENERATION_OF_PRECURSOR_METABOLITES_AND_ENERGY	GO_GENERATION_OF_PRECURSOR_METABOLITES_AND_ENERGY		278	0.400276	1.51313	0.0853659	0.127214	1	5406	tags=52%, list=29%, signal=72%
GO_REGULATION_OF_GENE_SILENCING	GO_REGULATION_OF_GENE_SILENCING		50	0.42436	1.5116	0.0684932	0.128204	1	6042	tags=58%, list=32%, signal=85%
GO_MICROTUBULE_CYTOSKELETON_ORGANIZATION	GO_MICROTUBULE_CYTOSKELETON_ORGANIZATION		315	0.349239	1.5111	0.0761523	0.128404	1	3676	tags=36%, list=20%, signal=44%
GO_ANTIGEN_PROCESSING_AND_PRESENTATION_OF_EXOGENOUS_PEPTIDE_ANTIGEN_VIA_MHC_CLASS_I	GO_ANTIGEN_PROCESSING_AND_PRESENTATION_OF_EXOGENOUS_PEPTIDE_ANTIGEN_VIA_MHC_CLASS_I		65	0.520401	1.51016	0.118712	0.12893	1	4509	tags=63%, list=24%, signal=83%
GO_RESPONSE_TO_ENDOPLASMIC_RETICULUM_STRESS	GO_RESPONSE_TO_ENDOPLASMIC_RETICULUM_STRESS		220	0.375389	1.50938	0.055666	0.129368	1	5500	tags=48%, list=29%, signal=67%
GO_POLYUBIQUITIN_BINDING	GO_POLYUBIQUITIN_BINDING		38	0.444057	1.50919	0.0796813	0.129329	1	5387	tags=50%, list=29%, signal=70%
GO_REGULATION_OF_CELLULAR_KETONE_METABOLIC_PROCESS	GO_REGULATION_OF_CELLULAR_KETONE_METABOLIC_PROCESS		168	0.352009	1.5089	0.0455446	0.129358	1	5691	tags=50%, list=30%, signal=71%
GO_ANTIGEN_PROCESSING_AND_PRESENTATION_OF_PEPTIDE_ANTIGEN_VIA_MHC_CLASS_I	GO_ANTIGEN_PROCESSING_AND_PRESENTATION_OF_PEPTIDE_ANTIGEN_VIA_MHC_CLASS_I		90	0.471983	1.50884	0.0942623	0.129221	1	5033	tags=60%, list=27%, signal=82%
GO_REGULATION_OF_ANION_TRANSMEMBRANE_TRANSPORT	GO_REGULATION_OF_ANION_TRANSMEMBRANE_TRANSPORT		28	0.441235	1.50881	0.0419162	0.129074	1	4610	tags=43%, list=25%, signal=57%
GO_ORGANIC_ACID_CATABOLIC_PROCESS	GO_ORGANIC_ACID_CATABOLIC_PROCESS		199	0.366633	1.50867	0.0489796	0.129005	1	6180	tags=48%, list=33%, signal=71%
GO_GLUTAMINE_FAMILY_AMINO_ACID_METABOLIC_PROCESS	GO_GLUTAMINE_FAMILY_AMINO_ACID_METABOLIC_PROCESS		63	0.407101	1.5075	0.0554415	0.129791	1	2158	tags=25%, list=12%, signal=29%
GO_QUINONE_METABOLIC_PROCESS	GO_QUINONE_METABOLIC_PROCESS		28	0.518589	1.50517	0.0895833	0.1314	1	4619	tags=54%, list=25%, signal=71%
GO_CELLULAR_AMINO_ACID_BIOSYNTHETIC_PROCESS	GO_CELLULAR_AMINO_ACID_BIOSYNTHETIC_PROCESS		88	0.403025	1.50419	0.0462777	0.132019	1	5617	tags=47%, list=30%, signal=66%
GO_REGULATION_OF_MITOCHONDRION_ORGANIZATION	GO_REGULATION_OF_MITOCHONDRION_ORGANIZATION		199	0.341562	1.50388	0.0246914	0.132065	1	6139	tags=52%, list=33%, signal=77%
GO_CHROMATIN_SILENCING	GO_CHROMATIN_SILENCING		82	0.449883	1.50307	0.108481	0.13258	1	5674	tags=51%, list=30%, signal=73%
GO_PROTEIN_TRANSPORTER_ACTIVITY	GO_PROTEIN_TRANSPORTER_ACTIVITY		96	0.392053	1.50244	0.0574949	0.132923	1	5459	tags=52%, list=29%, signal=73%
GO_ATP_BIOSYNTHETIC_PROCESS	GO_ATP_BIOSYNTHETIC_PROCESS		31	0.54282	1.50193	0.109405	0.133207	1	5800	tags=68%, list=31%, signal=98%
GO_MACROMOLECULE_DEACYLATION	GO_MACROMOLECULE_DEACYLATION		66	0.394653	1.50168	0.064257	0.13322	1	5377	tags=50%, list=29%, signal=70%
GO_CARBOXY_LYASE_ACTIVITY	GO_CARBOXY_LYASE_ACTIVITY		32	0.456793	1.50133	0.057732	0.133325	1	5372	tags=50%, list=29%, signal=70%
GO_RNA_DESTABILIZATION	GO_RNA_DESTABILIZATION		15	0.53158	1.49966	0.0823293	0.134414	1	1748	tags=40%, list=9%, signal=44%
GO_NUCLEAR_TRANSCRIBED_MRNA_CATABOLIC_PROCESS_NONSENSE_MEDIATED_DECAY	GO_NUCLEAR_TRANSCRIBED_MRNA_CATABOLIC_PROCESS_NONSENSE_MEDIATED_DECAY		117	0.560965	1.4996	0.15261	0.134294	1	6991	tags=86%, list=37%, signal=137%
GO_CHROMATIN_SILENCING_AT_RDNA	GO_CHROMATIN_SILENCING_AT_RDNA		37	0.529208	1.49955	0.103718	0.134158	1	5884	tags=57%, list=31%, signal=83%
GO_PORE_COMPLEX_ASSEMBLY	GO_PORE_COMPLEX_ASSEMBLY		15	0.586564	1.49913	0.0871287	0.134349	1	2810	tags=60%, list=15%, signal=71%
GO_PROTEIN_N_TERMINUS_BINDING	GO_PROTEIN_N_TERMINUS_BINDING		101	0.372289	1.49776	0.0422265	0.135252	1	6147	tags=53%, list=33%, signal=79%
GO_U4_U6_X_U5_TRI_SNRNP_COMPLEX	GO_U4_U6_X_U5_TRI_SNRNP_COMPLEX		21	0.584179	1.4952	0.0912779	0.137139	1	4308	tags=76%, list=23%, signal=99%
GO_ACYL_COA_DEHYDROGENASE_ACTIVITY	GO_ACYL_COA_DEHYDROGENASE_ACTIVITY		17	0.534849	1.49509	0.0979592	0.137044	1	5797	tags=71%, list=31%, signal=102%
GO_MACROMOLECULE_TRANSMEMBRANE_TRANSPORTER_ACTIVITY	GO_MACROMOLECULE_TRANSMEMBRANE_TRANSPORTER_ACTIVITY		20	0.51335	1.49459	0.0591966	0.137232	1	5459	tags=60%, list=29%, signal=85%
GO_ANTIGEN_PROCESSING_AND_PRESENTATION_OF_PEPTIDE_ANTIGEN	GO_ANTIGEN_PROCESSING_AND_PRESENTATION_OF_PEPTIDE_ANTIGEN		170	0.410097	1.49455	0.101449	0.137071	1	5033	tags=47%, list=27%, signal=64%
GO_POSITIVE_REGULATION_OF_LAMELLIPODIUM_ORGANIZATION	GO_POSITIVE_REGULATION_OF_LAMELLIPODIUM_ORGANIZATION		22	0.476542	1.49252	0.0546875	0.13859	1	3423	tags=36%, list=18%, signal=44%
GO_CHROMOSOME_SEPARATION	GO_CHROMOSOME_SEPARATION		16	0.562199	1.49103	0.0901804	0.139589	1	4554	tags=63%, list=24%, signal=83%
GO_MONOSACCHARIDE_METABOLIC_PROCESS	GO_MONOSACCHARIDE_METABOLIC_PROCESS		191	0.356693	1.49096	0.0489237	0.139459	1	5002	tags=38%, list=27%, signal=52%
GO_REGULATION_OF_MRNA_3_END_PROCESSING	GO_REGULATION_OF_MRNA_3_END_PROCESSING		26	0.497193	1.49083	0.0959184	0.139375	1	6515	tags=77%, list=35%, signal=118%
GO_GAMMA_TUBULIN_COMPLEX	GO_GAMMA_TUBULIN_COMPLEX		19	0.507634	1.49043	0.0712831	0.139484	1	4732	tags=63%, list=25%, signal=84%
GO_RNA_POLYMERASE_CORE_ENZYME_BINDING	GO_RNA_POLYMERASE_CORE_ENZYME_BINDING		19	0.529727	1.49015	0.0773931	0.139537	1	8140	tags=79%, list=44%, signal=140%
GO_OXIDOREDUCTASE_ACTIVITY_ACTING_ON_THE_CH_NH_GROUP_OF_DONORS_NAD_OR_NADP_AS_ACCEPTOR	GO_OXIDOREDUCTASE_ACTIVITY_ACTING_ON_THE_CH_NH_GROUP_OF_DONORS_NAD_OR_NADP_AS_ACCEPTOR		16	0.514935	1.49015	0.0584677	0.139355	1	4535	tags=63%, list=24%, signal=82%
GO_CUL4_RING_E3_UBIQUITIN_LIGASE_COMPLEX	GO_CUL4_RING_E3_UBIQUITIN_LIGASE_COMPLEX		25	0.513101	1.48719	0.0584677	0.141589	1	4380	tags=56%, list=23%, signal=73%
GO_POSITIVE_REGULATION_OF_NUCLEAR_DIVISION	GO_POSITIVE_REGULATION_OF_NUCLEAR_DIVISION		57	0.3837	1.48692	0.0451866	0.141627	1	3662	tags=33%, list=20%, signal=41%
GO_REGULATION_OF_CHROMATIN_SILENCING	GO_REGULATION_OF_CHROMATIN_SILENCING		21	0.51183	1.48606	0.0846774	0.142252	1	2385	tags=33%, list=13%, signal=38%
GO_REGULATION_OF_TRANSCRIPTION_INITIATION_FROM_RNA_POLYMERASE_II_PROMOTER	GO_REGULATION_OF_TRANSCRIPTION_INITIATION_FROM_RNA_POLYMERASE_II_PROMOTER		23	0.492294	1.48391	0.0806452	0.143905	1	4627	tags=57%, list=25%, signal=75%
GO_PROTEIN_K11_LINKED_UBIQUITINATION	GO_PROTEIN_K11_LINKED_UBIQUITINATION		26	0.519371	1.48189	0.0875	0.145434	1	6280	tags=77%, list=34%, signal=116%
GO_NUCLEAR_EUCHROMATIN	GO_NUCLEAR_EUCHROMATIN		23	0.486754	1.48161	0.0682731	0.1455	1	6912	tags=61%, list=37%, signal=96%
GO_MICROBODY_MEMBRANE	GO_MICROBODY_MEMBRANE		57	0.415866	1.48021	0.0519751	0.146545	1	6204	tags=60%, list=33%, signal=89%
GO_CELL_SEPARATION_AFTER_CYTOKINESIS	GO_CELL_SEPARATION_AFTER_CYTOKINESIS		17	0.548345	1.47964	0.0968379	0.146792	1	5148	tags=59%, list=28%, signal=81%
GO_HYDROLASE_ACTIVITY_ACTING_ON_CARBON_NITROGEN_BUT_NOT_PEPTIDE_BONDS_IN_LINEAR_AMIDES	GO_HYDROLASE_ACTIVITY_ACTING_ON_CARBON_NITROGEN_BUT_NOT_PEPTIDE_BONDS_IN_LINEAR_AMIDES		84	0.357603	1.4793	0.0241935	0.146889	1	5581	tags=44%, list=30%, signal=62%
GO_CYTOSOLIC_PART	GO_CYTOSOLIC_PART		211	0.444695	1.4784	0.134969	0.147459	1	6728	tags=69%, list=36%, signal=106%
GO_NEURON_APOPTOTIC_PROCESS	GO_NEURON_APOPTOTIC_PROCESS		34	0.422759	1.47742	0.0585774	0.148136	1	5071	tags=50%, list=27%, signal=68%
GO_REGULATION_OF_PROTEIN_INSERTION_INTO_MITOCHONDRIAL_MEMBRANE_INVOLVED_IN_APOPTOTIC_SIGNALING_PATHWAY	GO_REGULATION_OF_PROTEIN_INSERTION_INTO_MITOCHONDRIAL_MEMBRANE_INVOLVED_IN_APOPTOTIC_SIGNALING_PATHWAY		29	0.479614	1.47628	0.0721649	0.148946	1	5979	tags=66%, list=32%, signal=96%
GO_HEXOSE_METABOLIC_PROCESS	GO_HEXOSE_METABOLIC_PROCESS		147	0.361499	1.47592	0.0707269	0.149038	1	5338	tags=42%, list=29%, signal=59%
GO_MITOCHONDRIAL_RESPIRATORY_CHAIN_COMPLEX_I_BIOGENESIS	GO_MITOCHONDRIAL_RESPIRATORY_CHAIN_COMPLEX_I_BIOGENESIS		51	0.604214	1.47532	0.129225	0.149364	1	6755	tags=90%, list=36%, signal=141%
GO_DNA_DAMAGE_RESPONSE_SIGNAL_TRANSDUCTION_RESULTING_IN_TRANSCRIPTION	GO_DNA_DAMAGE_RESPONSE_SIGNAL_TRANSDUCTION_RESULTING_IN_TRANSCRIPTION		15	0.504298	1.47519	0.0641283	0.149312	1	5268	tags=53%, list=28%, signal=74%
GO_POSITIVE_REGULATION_OF_MITOTIC_CELL_CYCLE	GO_POSITIVE_REGULATION_OF_MITOTIC_CELL_CYCLE		118	0.36013	1.47365	0.0545455	0.150471	1	2857	tags=32%, list=15%, signal=38%
GO_CHAPERONE_BINDING	GO_CHAPERONE_BINDING		78	0.388891	1.47315	0.0631164	0.150725	1	5294	tags=53%, list=28%, signal=73%
GO_POSITIVE_REGULATION_OF_TRANSCRIPTION_INITIATION_FROM_RNA_POLYMERASE_II_PROMOTER	GO_POSITIVE_REGULATION_OF_TRANSCRIPTION_INITIATION_FROM_RNA_POLYMERASE_II_PROMOTER		17	0.52642	1.47299	0.0770833	0.150685	1	4518	tags=59%, list=24%, signal=77%
GO_TRICARBOXYLIC_ACID_METABOLIC_PROCESS	GO_TRICARBOXYLIC_ACID_METABOLIC_PROCESS		36	0.508423	1.47272	0.116327	0.150696	1	5074	tags=67%, list=27%, signal=91%
GO_POSITIVE_REGULATION_OF_DNA_REPLICATION	GO_POSITIVE_REGULATION_OF_DNA_REPLICATION		83	0.368743	1.47239	0.0425532	0.150804	1	3142	tags=35%, list=17%, signal=42%
GO_PML_BODY	GO_PML_BODY		94	0.377509	1.47227	0.0507099	0.150713	1	5451	tags=46%, list=29%, signal=64%
GO_MRNA_3_UTR_BINDING	GO_MRNA_3_UTR_BINDING		47	0.420417	1.47059	0.072	0.151918	1	3635	tags=43%, list=19%, signal=53%
GO_POSITIVE_REGULATION_OF_TELOMERASE_ACTIVITY	GO_POSITIVE_REGULATION_OF_TELOMERASE_ACTIVITY		27	0.459163	1.47059	0.0809129	0.151728	1	3872	tags=44%, list=21%, signal=56%
GO_ELECTRON_TRANSPORT_CHAIN	GO_ELECTRON_TRANSPORT_CHAIN		91	0.542915	1.47054	0.138493	0.151577	1	6136	tags=76%, list=33%, signal=112%
GO_INNER_MITOCHONDRIAL_MEMBRANE_PROTEIN_COMPLEX	GO_INNER_MITOCHONDRIAL_MEMBRANE_PROTEIN_COMPLEX		100	0.582809	1.46924	0.12731	0.15248	1	5406	tags=73%, list=29%, signal=102%
GO_MICROTUBULE_BASED_PROCESS	GO_MICROTUBULE_BASED_PROCESS		479	0.322661	1.46863	0.0769231	0.152818	1	4309	tags=35%, list=23%, signal=44%
GO_VIRAL_GENOME_REPLICATION	GO_VIRAL_GENOME_REPLICATION		19	0.47004	1.46588	0.0642023	0.154901	1	3664	tags=53%, list=20%, signal=65%
GO_TRANS_GOLGI_NETWORK_MEMBRANE	GO_TRANS_GOLGI_NETWORK_MEMBRANE		76	0.384926	1.46578	0.0751445	0.154791	1	5313	tags=49%, list=28%, signal=68%
GO_NEGATIVE_REGULATION_OF_CELL_CYCLE	GO_NEGATIVE_REGULATION_OF_CELL_CYCLE		406	0.304561	1.46228	0.0380762	0.157763	1	4444	tags=37%, list=24%, signal=47%
GO_NEGATIVE_REGULATION_OF_CELL_CYCLE_G2_M_PHASE_TRANSITION	GO_NEGATIVE_REGULATION_OF_CELL_CYCLE_G2_M_PHASE_TRANSITION		23	0.455897	1.46087	0.0991561	0.158813	1	3815	tags=48%, list=20%, signal=60%
GO_PURINE_NUCLEOBASE_METABOLIC_PROCESS	GO_PURINE_NUCLEOBASE_METABOLIC_PROCESS		19	0.509396	1.45878	0.0841889	0.160526	1	2871	tags=37%, list=15%, signal=43%
GO_POSITIVE_REGULATION_OF_MITOCHONDRION_ORGANIZATION	GO_POSITIVE_REGULATION_OF_MITOCHONDRION_ORGANIZATION		152	0.332784	1.45878	0.0359281	0.160323	1	6139	tags=52%, list=33%, signal=77%
GO_MICROBODY_LUMEN	GO_MICROBODY_LUMEN		45	0.431574	1.45765	0.0860656	0.161137	1	7566	tags=62%, list=40%, signal=104%
GO_REGULATION_OF_OXIDATIVE_STRESS_INDUCED_INTRINSIC_APOPTOTIC_SIGNALING_PATHWAY	GO_REGULATION_OF_OXIDATIVE_STRESS_INDUCED_INTRINSIC_APOPTOTIC_SIGNALING_PATHWAY		26	0.461694	1.45753	0.0813492	0.161047	1	3938	tags=38%, list=21%, signal=49%
GO_APOPTOTIC_MITOCHONDRIAL_CHANGES	GO_APOPTOTIC_MITOCHONDRIAL_CHANGES		56	0.389234	1.45708	0.0475162	0.161234	1	4896	tags=45%, list=26%, signal=60%
GO_CARBOHYDRATE_PHOSPHORYLATION	GO_CARBOHYDRATE_PHOSPHORYLATION		20	0.484847	1.45506	0.0760234	0.162831	1	4200	tags=45%, list=22%, signal=58%
GO_REGULATION_OF_UBIQUITIN_PROTEIN_LIGASE_ACTIVITY	GO_REGULATION_OF_UBIQUITIN_PROTEIN_LIGASE_ACTIVITY		17	0.519897	1.45504	0.0885312	0.162649	1	970	tags=35%, list=5%, signal=37%
GO_NADP_METABOLIC_PROCESS	GO_NADP_METABOLIC_PROCESS		27	0.483105	1.45491	0.111111	0.16257	1	4122	tags=48%, list=22%, signal=62%
GO_NUCLEOTIDE_EXCISION_REPAIR_DNA_DAMAGE_RECOGNITION	GO_NUCLEOTIDE_EXCISION_REPAIR_DNA_DAMAGE_RECOGNITION		23	0.526866	1.45392	0.10084	0.163259	1	4309	tags=48%, list=23%, signal=62%
GO_MITOCHONDRION_MORPHOGENESIS	GO_MITOCHONDRION_MORPHOGENESIS		19	0.507921	1.45314	0.0985626	0.16375	1	6398	tags=79%, list=34%, signal=120%
GO_REGULATION_OF_TRANSCRIPTION_ELONGATION_FROM_RNA_POLYMERASE_II_PROMOTER	GO_REGULATION_OF_TRANSCRIPTION_ELONGATION_FROM_RNA_POLYMERASE_II_PROMOTER		20	0.488618	1.45159	0.068323	0.164946	1	6515	tags=60%, list=35%, signal=92%
GO_DNA_DOUBLE_STRAND_BREAK_PROCESSING	GO_DNA_DOUBLE_STRAND_BREAK_PROCESSING		19	0.521606	1.45071	0.126273	0.165548	1	4815	tags=58%, list=26%, signal=78%
GO_POSITIVE_REGULATION_OF_NIK_NF_KAPPAB_SIGNALING	GO_POSITIVE_REGULATION_OF_NIK_NF_KAPPAB_SIGNALING		29	0.43501	1.45058	0.086785	0.165451	1	2856	tags=31%, list=15%, signal=37%
GO_INTRA_GOLGI_VESICLE_MEDIATED_TRANSPORT	GO_INTRA_GOLGI_VESICLE_MEDIATED_TRANSPORT		47	0.426788	1.44946	0.0731707	0.166273	1	5450	tags=49%, list=29%, signal=69%
GO_POSITIVE_REGULATION_OF_TELOMERE_CAPPING	GO_POSITIVE_REGULATION_OF_TELOMERE_CAPPING		15	0.495357	1.44781	0.0818363	0.167517	1	3872	tags=40%, list=21%, signal=50%
GO_ASPARTATE_FAMILY_AMINO_ACID_METABOLIC_PROCESS	GO_ASPARTATE_FAMILY_AMINO_ACID_METABOLIC_PROCESS		52	0.41381	1.44718	0.0852878	0.167913	1	6319	tags=62%, list=34%, signal=93%
GO_O_METHYLTRANSFERASE_ACTIVITY	GO_O_METHYLTRANSFERASE_ACTIVITY		15	0.510417	1.44515	0.0738397	0.169544	1	6616	tags=73%, list=35%, signal=113%
GO_REGULATION_OF_SULFUR_METABOLIC_PROCESS	GO_REGULATION_OF_SULFUR_METABOLIC_PROCESS		19	0.499873	1.44311	0.0763052	0.171188	1	3298	tags=42%, list=18%, signal=51%
GO_LYASE_ACTIVITY	GO_LYASE_ACTIVITY		162	0.340943	1.44261	0.043659	0.171433	1	5394	tags=46%, list=29%, signal=64%
GO_LIPOPROTEIN_BIOSYNTHETIC_PROCESS	GO_LIPOPROTEIN_BIOSYNTHETIC_PROCESS		83	0.361988	1.44216	0.0670498	0.171638	1	3776	tags=34%, list=20%, signal=42%
GO_FATTY_ACYL_COA_METABOLIC_PROCESS	GO_FATTY_ACYL_COA_METABOLIC_PROCESS		48	0.404621	1.44043	0.0530612	0.173126	1	4701	tags=40%, list=25%, signal=53%
GO_MICROTUBULE_ASSOCIATED_COMPLEX	GO_MICROTUBULE_ASSOCIATED_COMPLEX		142	0.347181	1.44042	0.0712871	0.172918	1	4756	tags=38%, list=25%, signal=51%
GO_GLUCOSE_METABOLIC_PROCESS	GO_GLUCOSE_METABOLIC_PROCESS		113	0.363673	1.44003	0.0821643	0.173035	1	5002	tags=41%, list=27%, signal=55%
GO_BICELLULAR_TIGHT_JUNCTION_ASSEMBLY	GO_BICELLULAR_TIGHT_JUNCTION_ASSEMBLY		30	0.437571	1.43994	0.0873181	0.172906	1	3554	tags=43%, list=19%, signal=53%
GO_PEPTIDYL_LYSINE_METHYLATION	GO_PEPTIDYL_LYSINE_METHYLATION		59	0.389627	1.43876	0.0983936	0.173823	1	5182	tags=47%, list=28%, signal=65%
GO_OXIDATIVE_PHOSPHORYLATION	GO_OXIDATIVE_PHOSPHORYLATION		79	0.581876	1.43857	0.146694	0.173777	1	6252	tags=84%, list=33%, signal=125%
GO_OXIDOREDUCTASE_ACTIVITY_ACTING_ON_NAD_P_H_QUINONE_OR_SIMILAR_COMPOUND_AS_ACCEPTOR	GO_OXIDOREDUCTASE_ACTIVITY_ACTING_ON_NAD_P_H_QUINONE_OR_SIMILAR_COMPOUND_AS_ACCEPTOR		51	0.56458	1.43741	0.170683	0.174664	1	6713	tags=80%, list=36%, signal=125%
GO_ADP_BINDING	GO_ADP_BINDING		31	0.419829	1.43662	0.0757576	0.175253	1	4113	tags=48%, list=22%, signal=62%
GO_CELLULAR_METABOLIC_COMPOUND_SALVAGE	GO_CELLULAR_METABOLIC_COMPOUND_SALVAGE		35	0.424001	1.43637	0.107071	0.175255	1	3881	tags=43%, list=21%, signal=54%
GO_SOMATIC_CELL_DNA_RECOMBINATION	GO_SOMATIC_CELL_DNA_RECOMBINATION		32	0.47637	1.43605	0.106509	0.175334	1	4354	tags=47%, list=23%, signal=61%
GO_CELLULAR_RESPONSE_TO_NITRIC_OXIDE	GO_CELLULAR_RESPONSE_TO_NITRIC_OXIDE		15	0.494805	1.43527	0.0892116	0.17587	1	934	tags=33%, list=5%, signal=35%
GO_RECIPROCAL_DNA_RECOMBINATION	GO_RECIPROCAL_DNA_RECOMBINATION		36	0.455545	1.43477	0.108871	0.176159	1	4142	tags=42%, list=22%, signal=53%
GO_REGULATION_OF_NECROTIC_CELL_DEATH	GO_REGULATION_OF_NECROTIC_CELL_DEATH		25	0.462057	1.43427	0.10303	0.176416	1	6724	tags=68%, list=36%, signal=106%
GO_PROTEIN_ADP_RIBOSYLATION	GO_PROTEIN_ADP_RIBOSYLATION		20	0.444976	1.43411	0.0794574	0.176333	1	4405	tags=40%, list=24%, signal=52%
GO_FLAVIN_ADENINE_DINUCLEOTIDE_BINDING	GO_FLAVIN_ADENINE_DINUCLEOTIDE_BINDING		73	0.366871	1.43405	0.0738523	0.176177	1	5797	tags=55%, list=31%, signal=79%
GO_MITOCHONDRIAL_ATP_SYNTHESIS_COUPLED_PROTON_TRANSPORT	GO_MITOCHONDRIAL_ATP_SYNTHESIS_COUPLED_PROTON_TRANSPORT		17	0.666797	1.43403	0.128257	0.175982	1	5800	tags=88%, list=31%, signal=128%
GO_RIBOSOMAL_SMALL_SUBUNIT_ASSEMBLY	GO_RIBOSOMAL_SMALL_SUBUNIT_ASSEMBLY		16	0.649235	1.43364	0.131846	0.176126	1	5731	tags=81%, list=31%, signal=117%
GO_BINDING_OF_SPERM_TO_ZONA_PELLUCIDA	GO_BINDING_OF_SPERM_TO_ZONA_PELLUCIDA		33	0.464904	1.43179	0.109731	0.177681	1	2002	tags=21%, list=11%, signal=24%
GO_CLATHRIN_COAT	GO_CLATHRIN_COAT		46	0.404177	1.43093	0.0629921	0.178274	1	4833	tags=46%, list=26%, signal=61%
GO_CYCLIN_DEPENDENT_PROTEIN_KINASE_ACTIVITY	GO_CYCLIN_DEPENDENT_PROTEIN_KINASE_ACTIVITY		34	0.410107	1.42951	0.0617284	0.179334	1	6039	tags=62%, list=32%, signal=91%
GO_POSITIVE_REGULATION_OF_RESPONSE_TO_DNA_DAMAGE_STIMULUS	GO_POSITIVE_REGULATION_OF_RESPONSE_TO_DNA_DAMAGE_STIMULUS		58	0.377026	1.42922	0.0773931	0.179428	1	4662	tags=45%, list=25%, signal=60%
GO_ELECTRON_CARRIER_ACTIVITY	GO_ELECTRON_CARRIER_ACTIVITY		108	0.42008	1.42775	0.132653	0.18063	1	5882	tags=60%, list=31%, signal=87%
GO_NUCLEOSIDE_DIPHOSPHATE_KINASE_ACTIVITY	GO_NUCLEOSIDE_DIPHOSPHATE_KINASE_ACTIVITY		15	0.495505	1.42756	0.0858896	0.180615	1	3445	tags=40%, list=18%, signal=49%
GO_TRANSFERASE_ACTIVITY_TRANSFERRING_ALKYL_OR_ARYL_OTHER_THAN_METHYL_GROUPS	GO_TRANSFERASE_ACTIVITY_TRANSFERRING_ALKYL_OR_ARYL_OTHER_THAN_METHYL_GROUPS		59	0.402699	1.42612	0.0894309	0.181787	1	4680	tags=49%, list=25%, signal=65%
GO_REGULATION_OF_CELL_CYCLE_CHECKPOINT	GO_REGULATION_OF_CELL_CYCLE_CHECKPOINT		27	0.490379	1.42593	0.141717	0.181733	1	1844	tags=37%, list=10%, signal=41%
GO_NEGATIVE_REGULATION_OF_VIRAL_RELEASE_FROM_HOST_CELL	GO_NEGATIVE_REGULATION_OF_VIRAL_RELEASE_FROM_HOST_CELL		16	0.516198	1.42593	0.115464	0.181519	1	2385	tags=38%, list=13%, signal=43%
GO_REGULATION_OF_MRNA_CATABOLIC_PROCESS	GO_REGULATION_OF_MRNA_CATABOLIC_PROCESS		25	0.449589	1.42518	0.10041	0.182013	1	3933	tags=48%, list=21%, signal=61%
GO_ENERGY_DERIVATION_BY_OXIDATION_OF_ORGANIC_COMPOUNDS	GO_ENERGY_DERIVATION_BY_OXIDATION_OF_ORGANIC_COMPOUNDS		208	0.400353	1.42488	0.135081	0.182072	1	6136	tags=61%, list=33%, signal=89%
GO_MEDIATOR_COMPLEX	GO_MEDIATOR_COMPLEX		34	0.415136	1.42453	0.104331	0.182195	1	4458	tags=50%, list=24%, signal=66%
GO_PURINE_CONTAINING_COMPOUND_METABOLIC_PROCESS	GO_PURINE_CONTAINING_COMPOUND_METABOLIC_PROCESS		378	0.338325	1.4245	0.100205	0.182	1	3502	tags=34%, list=19%, signal=41%
GO_GLUTAMINE_FAMILY_AMINO_ACID_BIOSYNTHETIC_PROCESS	GO_GLUTAMINE_FAMILY_AMINO_ACID_BIOSYNTHETIC_PROCESS		19	0.481848	1.42176	0.0972222	0.184375	1	6681	tags=63%, list=36%, signal=98%
GO_MEMBRANE_BUDDING	GO_MEMBRANE_BUDDING		111	0.375943	1.42056	0.0963391	0.185336	1	6738	tags=60%, list=36%, signal=94%
GO_PROTON_TRANSPORTING_ATP_SYNTHASE_COMPLEX	GO_PROTON_TRANSPORTING_ATP_SYNTHASE_COMPLEX		22	0.645197	1.42045	0.15534	0.185242	1	5800	tags=82%, list=31%, signal=118%
GO_TBP_CLASS_PROTEIN_BINDING	GO_TBP_CLASS_PROTEIN_BINDING		20	0.488979	1.41953	0.122244	0.185937	1	5575	tags=65%, list=30%, signal=92%
GO_DEACETYLASE_ACTIVITY	GO_DEACETYLASE_ACTIVITY		54	0.383763	1.41951	0.0952381	0.185726	1	5377	tags=48%, list=29%, signal=67%
GO_CORE_PROMOTER_BINDING	GO_CORE_PROMOTER_BINDING		147	0.337823	1.41821	0.0785855	0.186763	1	5455	tags=44%, list=29%, signal=61%
GO_TRANSFERASE_ACTIVITY_TRANSFERRING_PENTOSYL_GROUPS	GO_TRANSFERASE_ACTIVITY_TRANSFERRING_PENTOSYL_GROUPS		51	0.364856	1.41764	0.066	0.18712	1	4405	tags=33%, list=24%, signal=43%
GO_MICROTUBULE_MOTOR_ACTIVITY	GO_MICROTUBULE_MOTOR_ACTIVITY		76	0.399671	1.41628	0.10387	0.18827	1	4756	tags=37%, list=25%, signal=49%
GO_TRANSCRIPTION_FACTOR_TFIID_COMPLEX	GO_TRANSCRIPTION_FACTOR_TFIID_COMPLEX		23	0.449105	1.41564	0.092827	0.188694	1	5504	tags=52%, list=29%, signal=74%
GO_T_CELL_RECEPTOR_SIGNALING_PATHWAY	GO_T_CELL_RECEPTOR_SIGNALING_PATHWAY		139	0.417818	1.41506	0.124016	0.189051	1	5062	tags=47%, list=27%, signal=65%
GO_DISULFIDE_OXIDOREDUCTASE_ACTIVITY	GO_DISULFIDE_OXIDOREDUCTASE_ACTIVITY		28	0.469155	1.414	0.116803	0.189869	1	4037	tags=46%, list=22%, signal=59%
GO_METHYL_CPG_BINDING	GO_METHYL_CPG_BINDING		16	0.497493	1.41337	0.121331	0.190295	1	1942	tags=44%, list=10%, signal=49%
GO_THIOLESTER_HYDROLASE_ACTIVITY	GO_THIOLESTER_HYDROLASE_ACTIVITY		32	0.426365	1.41329	0.105263	0.190155	1	4710	tags=34%, list=25%, signal=46%
GO_NEGATIVE_REGULATION_OF_SIGNAL_TRANSDUCTION_BY_P53_CLASS_MEDIATOR	GO_NEGATIVE_REGULATION_OF_SIGNAL_TRANSDUCTION_BY_P53_CLASS_MEDIATOR		26	0.449975	1.41318	0.104046	0.190036	1	4439	tags=50%, list=24%, signal=65%
GO_NEGATIVE_REGULATION_OF_TRANSLATIONAL_INITIATION	GO_NEGATIVE_REGULATION_OF_TRANSLATIONAL_INITIATION		20	0.483268	1.41263	0.100616	0.190327	1	5646	tags=60%, list=30%, signal=86%
GO_CELLULAR_RESPONSE_TO_RADIATION	GO_CELLULAR_RESPONSE_TO_RADIATION		131	0.31472	1.41257	0.0635246	0.19016	1	4980	tags=40%, list=27%, signal=55%
GO_HYDROLASE_ACTIVITY_ACTING_ON_CARBON_NITROGEN_BUT_NOT_PEPTIDE_BONDS	GO_HYDROLASE_ACTIVITY_ACTING_ON_CARBON_NITROGEN_BUT_NOT_PEPTIDE_BONDS		142	0.306634	1.41013	0.0305499	0.192413	1	5581	tags=38%, list=30%, signal=54%
GO_COPPER_ION_TRANSPORT	GO_COPPER_ION_TRANSPORT		20	0.458387	1.41011	0.0822785	0.192201	1	4110	tags=40%, list=22%, signal=51%
GO_SYNAPTONEMAL_COMPLEX	GO_SYNAPTONEMAL_COMPLEX		32	0.44234	1.40968	0.1	0.19238	1	4877	tags=38%, list=26%, signal=51%
GO_AU_RICH_ELEMENT_BINDING	GO_AU_RICH_ELEMENT_BINDING		22	0.462941	1.40945	0.10101	0.1924	1	1805	tags=41%, list=10%, signal=45%
GO_PROTEIN_DEACETYLASE_ACTIVITY	GO_PROTEIN_DEACETYLASE_ACTIVITY		43	0.407228	1.40945	0.116935	0.192181	1	5377	tags=53%, list=29%, signal=75%
GO_CARBON_CARBON_LYASE_ACTIVITY	GO_CARBON_CARBON_LYASE_ACTIVITY		47	0.416865	1.40931	0.0849257	0.192115	1	5372	tags=49%, list=29%, signal=68%
GO_CHROMATIN_DISASSEMBLY	GO_CHROMATIN_DISASSEMBLY		15	0.549803	1.40922	0.125984	0.19199	1	2859	tags=53%, list=15%, signal=63%
GO_CYSTEINE_TYPE_PEPTIDASE_ACTIVITY	GO_CYSTEINE_TYPE_PEPTIDASE_ACTIVITY		157	0.325248	1.40897	0.0565302	0.192023	1	5599	tags=45%, list=30%, signal=63%
GO_NUCLEOTIDE_SUGAR_METABOLIC_PROCESS	GO_NUCLEOTIDE_SUGAR_METABOLIC_PROCESS		33	0.438163	1.40892	0.118217	0.191842	1	2986	tags=39%, list=16%, signal=47%
GO_DNA_BINDING_BENDING	GO_DNA_BINDING_BENDING		20	0.471531	1.40783	0.0948617	0.192643	1	4867	tags=50%, list=26%, signal=68%
GO_O_ACYLTRANSFERASE_ACTIVITY	GO_O_ACYLTRANSFERASE_ACTIVITY		45	0.378561	1.40685	0.0803059	0.193389	1	6813	tags=51%, list=36%, signal=80%
GO_PROTEIN_UBIQUITINATION_INVOLVED_IN_UBIQUITIN_DEPENDENT_PROTEIN_CATABOLIC_PROCESS	GO_PROTEIN_UBIQUITINATION_INVOLVED_IN_UBIQUITIN_DEPENDENT_PROTEIN_CATABOLIC_PROCESS		128	0.343834	1.40577	0.091954	0.194217	1	4548	tags=41%, list=24%, signal=54%
GO_ESTABLISHMENT_OF_SPINDLE_ORIENTATION	GO_ESTABLISHMENT_OF_SPINDLE_ORIENTATION		24	0.465649	1.40332	0.106557	0.196533	1	1780	tags=33%, list=10%, signal=37%
GO_NEGATIVE_REGULATION_OF_HISTONE_MODIFICATION	GO_NEGATIVE_REGULATION_OF_HISTONE_MODIFICATION		36	0.422824	1.40299	0.118	0.196659	1	4285	tags=44%, list=23%, signal=58%
GO_NEGATIVE_REGULATION_OF_DNA_DEPENDENT_DNA_REPLICATION	GO_NEGATIVE_REGULATION_OF_DNA_DEPENDENT_DNA_REPLICATION		15	0.540365	1.40211	0.140461	0.197286	1	4440	tags=60%, list=24%, signal=79%
GO_NITROGEN_CYCLE_METABOLIC_PROCESS	GO_NITROGEN_CYCLE_METABOLIC_PROCESS		15	0.489449	1.40146	0.118712	0.197692	1	3078	tags=33%, list=16%, signal=40%
GO_LYSINE_N_METHYLTRANSFERASE_ACTIVITY	GO_LYSINE_N_METHYLTRANSFERASE_ACTIVITY		41	0.396047	1.40115	0.116564	0.197794	1	5951	tags=56%, list=32%, signal=82%
GO_POSITIVE_REGULATION_OF_TYPE_I_INTERFERON_PRODUCTION	GO_POSITIVE_REGULATION_OF_TYPE_I_INTERFERON_PRODUCTION		69	0.392702	1.40015	0.0938776	0.198574	1	5925	tags=57%, list=32%, signal=82%
GO_CYTOSOLIC_SMALL_RIBOSOMAL_SUBUNIT	GO_CYTOSOLIC_SMALL_RIBOSOMAL_SUBUNIT		43	0.589676	1.39997	0.194	0.198545	1	6599	tags=81%, list=35%, signal=125%
GO_CYTOSOLIC_RIBOSOME	GO_CYTOSOLIC_RIBOSOME		109	0.560208	1.39986	0.206349	0.198427	1	6991	tags=83%, list=37%, signal=133%
GO_REGULATION_OF_HEMATOPOIETIC_PROGENITOR_CELL_DIFFERENTIATION	GO_REGULATION_OF_HEMATOPOIETIC_PROGENITOR_CELL_DIFFERENTIATION		41	0.401714	1.39978	0.110187	0.198278	1	4717	tags=34%, list=25%, signal=46%
GO_UBIQUITIN_LIKE_PROTEIN_SPECIFIC_PROTEASE_ACTIVITY	GO_UBIQUITIN_LIKE_PROTEIN_SPECIFIC_PROTEASE_ACTIVITY		96	0.375711	1.39966	0.0936255	0.198174	1	5542	tags=49%, list=30%, signal=69%
GO_TRANSITION_METAL_ION_TRANSMEMBRANE_TRANSPORTER_ACTIVITY	GO_TRANSITION_METAL_ION_TRANSMEMBRANE_TRANSPORTER_ACTIVITY		39	0.408769	1.39849	0.0742972	0.199083	1	6776	tags=51%, list=36%, signal=80%
GO_NEGATIVE_REGULATION_OF_DNA_BIOSYNTHETIC_PROCESS	GO_NEGATIVE_REGULATION_OF_DNA_BIOSYNTHETIC_PROCESS		30	0.394766	1.39841	0.0805785	0.198943	1	1914	tags=33%, list=10%, signal=37%
GO_RESPONSE_TO_GAMMA_RADIATION	GO_RESPONSE_TO_GAMMA_RADIATION		49	0.383822	1.39776	0.107356	0.199386	1	2055	tags=31%, list=11%, signal=34%
GO_REGULATION_OF_CELL_CYCLE_G2_M_PHASE_TRANSITION	GO_REGULATION_OF_CELL_CYCLE_G2_M_PHASE_TRANSITION		57	0.377752	1.39578	0.0903226	0.201187	1	2722	tags=33%, list=15%, signal=39%
GO_RNA_POLYMERASE_II_CORE_BINDING	GO_RNA_POLYMERASE_II_CORE_BINDING		15	0.523465	1.39494	0.143149	0.201811	1	8576	tags=80%, list=46%, signal=148%
GO_RESPONSE_TO_MANGANESE_ION	GO_RESPONSE_TO_MANGANESE_ION		16	0.475546	1.39441	0.132265	0.202091	1	3224	tags=50%, list=17%, signal=60%
GO_ARP2_3_COMPLEX_MEDIATED_ACTIN_NUCLEATION	GO_ARP2_3_COMPLEX_MEDIATED_ACTIN_NUCLEATION		15	0.521368	1.39226	0.144016	0.203912	1	5273	tags=73%, list=28%, signal=102%
GO_ESTABLISHMENT_OF_PROTEIN_LOCALIZATION_TO_ENDOPLASMIC_RETICULUM	GO_ESTABLISHMENT_OF_PROTEIN_LOCALIZATION_TO_ENDOPLASMIC_RETICULUM		103	0.56063	1.39133	0.214145	0.204605	1	7178	tags=84%, list=38%, signal=136%
GO_TELOMERE_CAPPING	GO_TELOMERE_CAPPING		28	0.448785	1.39095	0.138776	0.204764	1	8214	tags=75%, list=44%, signal=133%
GO_REGULATION_OF_CHOLESTEROL_METABOLIC_PROCESS	GO_REGULATION_OF_CHOLESTEROL_METABOLIC_PROCESS		22	0.461244	1.3908	0.128205	0.20468	1	5870	tags=59%, list=31%, signal=86%
GO_CELLULAR_MODIFIED_AMINO_ACID_METABOLIC_PROCESS	GO_CELLULAR_MODIFIED_AMINO_ACID_METABOLIC_PROCESS		206	0.323751	1.38844	0.0653061	0.206887	1	4680	tags=35%, list=25%, signal=47%
GO_CELLULAR_RESPONSE_TO_REACTIVE_NITROGEN_SPECIES	GO_CELLULAR_RESPONSE_TO_REACTIVE_NITROGEN_SPECIES		19	0.457537	1.38822	0.0840336	0.206882	1	934	tags=26%, list=5%, signal=28%
GO_NADP_BINDING	GO_NADP_BINDING		42	0.38837	1.38719	0.11	0.207703	1	800	tags=21%, list=4%, signal=22%
GO_TELOMERE_MAINTENANCE_VIA_TELOMERASE	GO_TELOMERE_MAINTENANCE_VIA_TELOMERASE		16	0.500893	1.38712	0.117886	0.207539	1	2855	tags=38%, list=15%, signal=44%
GO_CYTOSOLIC_LARGE_RIBOSOMAL_SUBUNIT	GO_CYTOSOLIC_LARGE_RIBOSOMAL_SUBUNIT		58	0.597109	1.38641	0.200393	0.208	1	6991	tags=90%, list=37%, signal=143%
GO_CELLULAR_RESPONSE_TO_GAMMA_RADIATION	GO_CELLULAR_RESPONSE_TO_GAMMA_RADIATION		19	0.444472	1.38633	0.124748	0.20784	1	2045	tags=42%, list=11%, signal=47%
GO_NEGATIVE_REGULATION_OF_DNA_METABOLIC_PROCESS	GO_NEGATIVE_REGULATION_OF_DNA_METABOLIC_PROCESS		105	0.347105	1.38586	0.110664	0.208133	1	4078	tags=38%, list=22%, signal=48%
GO_REGULATION_OF_ESTABLISHMENT_OF_PROTEIN_LOCALIZATION_TO_MITOCHONDRION	GO_REGULATION_OF_ESTABLISHMENT_OF_PROTEIN_LOCALIZATION_TO_MITOCHONDRION		121	0.315712	1.38584	0.0578842	0.207907	1	6234	tags=50%, list=33%, signal=74%
GO_MICROTUBULE	GO_MICROTUBULE		384	0.300878	1.38582	0.0743802	0.207702	1	5001	tags=39%, list=27%, signal=52%
GO_DNA_PACKAGING_COMPLEX	GO_DNA_PACKAGING_COMPLEX		94	0.47305	1.38538	0.181452	0.207897	1	8589	tags=80%, list=46%, signal=147%
GO_POSITIVE_REGULATION_OF_CYSTEINE_TYPE_ENDOPEPTIDASE_ACTIVITY_INVOLVED_IN_APOPTOTIC_SIGNALING_PATHWAY	GO_POSITIVE_REGULATION_OF_CYSTEINE_TYPE_ENDOPEPTIDASE_ACTIVITY_INVOLVED_IN_APOPTOTIC_SIGNALING_PATHWAY		17	0.526896	1.38397	0.149701	0.209147	1	1646	tags=35%, list=9%, signal=39%
GO_POLYOL_CATABOLIC_PROCESS	GO_POLYOL_CATABOLIC_PROCESS		17	0.457838	1.38327	0.112621	0.209657	1	5900	tags=53%, list=32%, signal=77%
GO_OXIDOREDUCTASE_ACTIVITY_ACTING_ON_NAD_P_H	GO_OXIDOREDUCTASE_ACTIVITY_ACTING_ON_NAD_P_H		90	0.434211	1.38326	0.166667	0.209439	1	6747	tags=67%, list=36%, signal=104%
GO_PROTEIN_DEPOLYMERIZATION	GO_PROTEIN_DEPOLYMERIZATION		24	0.418798	1.38291	0.109731	0.209575	1	2568	tags=38%, list=14%, signal=43%
GO_FC_RECEPTOR_SIGNALING_PATHWAY	GO_FC_RECEPTOR_SIGNALING_PATHWAY		183	0.347386	1.38288	0.121154	0.209358	1	5390	tags=45%, list=29%, signal=63%
GO_POSITIVE_REGULATION_OF_CATABOLIC_PROCESS	GO_POSITIVE_REGULATION_OF_CATABOLIC_PROCESS		384	0.297485	1.38276	0.0581162	0.209249	1	5075	tags=41%, list=27%, signal=55%
GO_ENDONUCLEASE_ACTIVITY_ACTIVE_WITH_EITHER_RIBO_OR_DEOXYRIBONUCLEIC_ACIDS_AND_PRODUCING_3_PHOSPHOMONOESTERS	GO_ENDONUCLEASE_ACTIVITY_ACTIVE_WITH_EITHER_RIBO_OR_DEOXYRIBONUCLEIC_ACIDS_AND_PRODUCING_3_PHOSPHOMONOESTERS		17	0.473356	1.38238	0.116832	0.209424	1	5589	tags=53%, list=30%, signal=75%
GO_BASAL_TRANSCRIPTION_MACHINERY_BINDING	GO_BASAL_TRANSCRIPTION_MACHINERY_BINDING		23	0.464969	1.38169	0.143434	0.209916	1	4092	tags=48%, list=22%, signal=61%
GO_ISOTYPE_SWITCHING	GO_ISOTYPE_SWITCHING		16	0.505101	1.38128	0.15507	0.210102	1	5368	tags=56%, list=29%, signal=79%
GO_NEGATIVE_REGULATION_OF_CELLULAR_AMIDE_METABOLIC_PROCESS	GO_NEGATIVE_REGULATION_OF_CELLULAR_AMIDE_METABOLIC_PROCESS		121	0.330349	1.38076	0.108527	0.210432	1	5716	tags=45%, list=31%, signal=65%
GO_REGULATION_OF_PROTEIN_EXPORT_FROM_NUCLEUS	GO_REGULATION_OF_PROTEIN_EXPORT_FROM_NUCLEUS		33	0.41175	1.38001	0.105477	0.210954	1	3309	tags=36%, list=18%, signal=44%
GO_SMALL_MOLECULE_BIOSYNTHETIC_PROCESS	GO_SMALL_MOLECULE_BIOSYNTHETIC_PROCESS		419	0.305611	1.37994	0.0669371	0.210787	1	5046	tags=38%, list=27%, signal=51%
GO_REGULATION_OF_CYSTEINE_TYPE_ENDOPEPTIDASE_ACTIVITY_INVOLVED_IN_APOPTOTIC_SIGNALING_PATHWAY	GO_REGULATION_OF_CYSTEINE_TYPE_ENDOPEPTIDASE_ACTIVITY_INVOLVED_IN_APOPTOTIC_SIGNALING_PATHWAY		22	0.491791	1.37984	0.150391	0.210661	1	1646	tags=32%, list=9%, signal=35%
GO_TOXIN_TRANSPORT	GO_TOXIN_TRANSPORT		36	0.406829	1.37971	0.0983936	0.210563	1	5849	tags=53%, list=31%, signal=77%
GO_DRUG_TRANSPORT	GO_DRUG_TRANSPORT		25	0.429226	1.37857	0.0848126	0.211514	1	2141	tags=28%, list=11%, signal=32%
GO_BETA_CATENIN_DESTRUCTION_COMPLEX_DISASSEMBLY	GO_BETA_CATENIN_DESTRUCTION_COMPLEX_DISASSEMBLY		21	0.446312	1.3785	0.123047	0.211358	1	3662	tags=38%, list=20%, signal=47%
GO_VITAMIN_METABOLIC_PROCESS	GO_VITAMIN_METABOLIC_PROCESS		114	0.35659	1.37839	0.0699433	0.211251	1	6065	tags=46%, list=32%, signal=67%
GO_REGULATION_OF_PROTEIN_STABILITY	GO_REGULATION_OF_PROTEIN_STABILITY		211	0.312182	1.37828	0.0710173	0.211121	1	4909	tags=39%, list=26%, signal=52%
GO_REGULATION_OF_CHROMATIN_ORGANIZATION	GO_REGULATION_OF_CHROMATIN_ORGANIZATION		147	0.331554	1.37769	0.0963855	0.211477	1	5632	tags=48%, list=30%, signal=68%
GO_ACETYL_COA_METABOLIC_PROCESS	GO_ACETYL_COA_METABOLIC_PROCESS		23	0.458461	1.37754	0.118367	0.211409	1	4701	tags=48%, list=25%, signal=64%
GO_PROTON_TRANSPORTING_TWO_SECTOR_ATPASE_COMPLEX_PROTON_TRANSPORTING_DOMAIN	GO_PROTON_TRANSPORTING_TWO_SECTOR_ATPASE_COMPLEX_PROTON_TRANSPORTING_DOMAIN		21	0.530466	1.37482	0.164356	0.213961	1	5800	tags=62%, list=31%, signal=90%
GO_DEPHOSPHORYLATION	GO_DEPHOSPHORYLATION		262	0.286623	1.37453	0.0578842	0.214038	1	5111	tags=35%, list=27%, signal=48%
GO_NEGATIVE_REGULATION_OF_HISTONE_METHYLATION	GO_NEGATIVE_REGULATION_OF_HISTONE_METHYLATION		16	0.509609	1.37447	0.132	0.213879	1	3802	tags=56%, list=20%, signal=71%
GO_PROTEIN_KINASE_C_SIGNALING	GO_PROTEIN_KINASE_C_SIGNALING		15	0.491348	1.3744	0.0932755	0.213712	1	1439	tags=27%, list=8%, signal=29%
GO_POSITIVE_REGULATION_OF_MRNA_3_END_PROCESSING	GO_POSITIVE_REGULATION_OF_MRNA_3_END_PROCESSING		16	0.478564	1.37376	0.1222	0.214175	1	3805	tags=50%, list=20%, signal=63%
GO_POSITIVE_REGULATION_OF_MULTI_ORGANISM_PROCESS	GO_POSITIVE_REGULATION_OF_MULTI_ORGANISM_PROCESS		146	0.309713	1.37307	0.064	0.214658	1	5743	tags=48%, list=31%, signal=69%
GO_REGULATION_OF_TELOMERE_CAPPING	GO_REGULATION_OF_TELOMERE_CAPPING		21	0.447412	1.3723	0.114919	0.215235	1	6368	tags=57%, list=34%, signal=87%
GO_RESPONSE_TO_X_RAY	GO_RESPONSE_TO_X_RAY		30	0.434036	1.37184	0.138776	0.215499	1	2487	tags=37%, list=13%, signal=42%
GO_RESPIRATORY_CHAIN	GO_RESPIRATORY_CHAIN		77	0.541644	1.37117	0.212551	0.216004	1	6680	tags=84%, list=36%, signal=131%
GO_PROTEIN_K63_LINKED_UBIQUITINATION	GO_PROTEIN_K63_LINKED_UBIQUITINATION		34	0.401153	1.371	0.104508	0.215925	1	6704	tags=68%, list=36%, signal=105%
GO_RESPONSE_TO_RADIATION	GO_RESPONSE_TO_RADIATION		390	0.271469	1.37051	0.0477137	0.216214	1	4896	tags=34%, list=26%, signal=45%
GO_OXIDOREDUCTASE_ACTIVITY_ACTING_ON_A_SULFUR_GROUP_OF_DONORS	GO_OXIDOREDUCTASE_ACTIVITY_ACTING_ON_A_SULFUR_GROUP_OF_DONORS		44	0.403091	1.37024	0.146586	0.216252	1	4037	tags=43%, list=22%, signal=55%
GO_SWI_SNF_COMPLEX	GO_SWI_SNF_COMPLEX		15	0.493798	1.36956	0.143133	0.21673	1	4031	tags=53%, list=22%, signal=68%
GO_PURINE_CONTAINING_COMPOUND_BIOSYNTHETIC_PROCESS	GO_PURINE_CONTAINING_COMPOUND_BIOSYNTHETIC_PROCESS		131	0.332325	1.36857	0.0936864	0.217588	1	3736	tags=37%, list=20%, signal=45%
GO_REGULATION_OF_PROTEIN_EXIT_FROM_ENDOPLASMIC_RETICULUM	GO_REGULATION_OF_PROTEIN_EXIT_FROM_ENDOPLASMIC_RETICULUM		18	0.487412	1.36798	0.119181	0.217968	1	6267	tags=50%, list=33%, signal=75%
GO_ESTABLISHMENT_OF_PROTEIN_LOCALIZATION_TO_VACUOLE	GO_ESTABLISHMENT_OF_PROTEIN_LOCALIZATION_TO_VACUOLE		30	0.444684	1.36707	0.142586	0.218642	1	6731	tags=63%, list=36%, signal=99%
GO_PROTEIN_FOLDING	GO_PROTEIN_FOLDING		207	0.343061	1.36694	0.127016	0.218535	1	5375	tags=46%, list=29%, signal=64%
GO_P53_BINDING	GO_P53_BINDING		66	0.358041	1.36683	0.115768	0.21843	1	6722	tags=64%, list=36%, signal=99%
GO_NEGATIVE_REGULATION_OF_CHROMATIN_MODIFICATION	GO_NEGATIVE_REGULATION_OF_CHROMATIN_MODIFICATION		45	0.399813	1.36663	0.142857	0.218433	1	2865	tags=33%, list=15%, signal=39%
GO_ANATOMICAL_STRUCTURE_HOMEOSTASIS	GO_ANATOMICAL_STRUCTURE_HOMEOSTASIS		267	0.275638	1.36602	0.0366599	0.218896	1	3808	tags=28%, list=20%, signal=34%
GO_ORGANELLE_ASSEMBLY	GO_ORGANELLE_ASSEMBLY		452	0.284982	1.3654	0.0916335	0.21926	1	4756	tags=36%, list=25%, signal=47%
GO_PHOSPHATIDYLGLYCEROL_METABOLIC_PROCESS	GO_PHOSPHATIDYLGLYCEROL_METABOLIC_PROCESS		31	0.402028	1.36469	0.0966469	0.219797	1	7074	tags=61%, list=38%, signal=98%
GO_ZINC_II_ION_TRANSPORT	GO_ZINC_II_ION_TRANSPORT		26	0.433702	1.36368	0.108949	0.220626	1	7758	tags=69%, list=41%, signal=118%
GO_GOLGI_VESICLE_TRANSPORT	GO_GOLGI_VESICLE_TRANSPORT		310	0.319201	1.36315	0.106178	0.220981	1	6565	tags=50%, list=35%, signal=76%
GO_APICAL_JUNCTION_ASSEMBLY	GO_APICAL_JUNCTION_ASSEMBLY		38	0.395702	1.36294	0.114053	0.220956	1	3554	tags=39%, list=19%, signal=49%
GO_PROTEIN_DISULFIDE_OXIDOREDUCTASE_ACTIVITY	GO_PROTEIN_DISULFIDE_OXIDOREDUCTASE_ACTIVITY		21	0.471654	1.3625	0.146392	0.221187	1	2601	tags=38%, list=14%, signal=44%
GO_INTRAMOLECULAR_OXIDOREDUCTASE_ACTIVITY	GO_INTRAMOLECULAR_OXIDOREDUCTASE_ACTIVITY		51	0.397926	1.36213	0.125737	0.221365	1	5914	tags=57%, list=32%, signal=83%
GO_NADH_DEHYDROGENASE_COMPLEX	GO_NADH_DEHYDROGENASE_COMPLEX		42	0.586703	1.36193	0.219959	0.221359	1	6680	tags=88%, list=36%, signal=137%
GO_CELLULAR_KETONE_METABOLIC_PROCESS	GO_CELLULAR_KETONE_METABOLIC_PROCESS		63	0.378422	1.35943	0.121739	0.22376	1	4218	tags=37%, list=23%, signal=47%
GO_PROTEIN_LOCALIZATION_TO_ENDOPLASMIC_RETICULUM	GO_PROTEIN_LOCALIZATION_TO_ENDOPLASMIC_RETICULUM		122	0.503726	1.35914	0.229541	0.223837	1	6991	tags=80%, list=37%, signal=126%
GO_SAGA_TYPE_COMPLEX	GO_SAGA_TYPE_COMPLEX		30	0.4196	1.35742	0.126506	0.225429	1	3670	tags=43%, list=20%, signal=54%
GO_MEIOTIC_CHROMOSOME_SEGREGATION	GO_MEIOTIC_CHROMOSOME_SEGREGATION		51	0.401729	1.3573	0.120582	0.225329	1	4877	tags=39%, list=26%, signal=53%
GO_OXIDOREDUCTASE_ACTIVITY_ACTING_ON_THE_CH_NH_GROUP_OF_DONORS	GO_OXIDOREDUCTASE_ACTIVITY_ACTING_ON_THE_CH_NH_GROUP_OF_DONORS		25	0.405313	1.35678	0.10883	0.22569	1	6408	tags=64%, list=34%, signal=97%
GO_POSITIVE_REGULATION_OF_CELLULAR_AMIDE_METABOLIC_PROCESS	GO_POSITIVE_REGULATION_OF_CELLULAR_AMIDE_METABOLIC_PROCESS		101	0.320833	1.35634	0.078125	0.22597	1	4285	tags=38%, list=23%, signal=49%
GO_2_IRON_2_SULFUR_CLUSTER_BINDING	GO_2_IRON_2_SULFUR_CLUSTER_BINDING		20	0.515955	1.35492	0.173653	0.22723	1	5572	tags=65%, list=30%, signal=92%
GO_NEGATIVE_REGULATION_OF_HEMATOPOIETIC_PROGENITOR_CELL_DIFFERENTIATION	GO_NEGATIVE_REGULATION_OF_HEMATOPOIETIC_PROGENITOR_CELL_DIFFERENTIATION		24	0.47702	1.35446	0.162325	0.227487	1	4717	tags=38%, list=25%, signal=50%
GO_ZYMOGEN_ACTIVATION	GO_ZYMOGEN_ACTIVATION		107	0.332474	1.35435	0.0933063	0.227366	1	2615	tags=25%, list=14%, signal=29%
GO_POSITIVE_REGULATION_OF_PROTEIN_COMPLEX_ASSEMBLY	GO_POSITIVE_REGULATION_OF_PROTEIN_COMPLEX_ASSEMBLY		180	0.305358	1.35401	0.0775348	0.227507	1	4030	tags=35%, list=22%, signal=44%
GO_POSITIVE_REGULATION_OF_CHROMATIN_MODIFICATION	GO_POSITIVE_REGULATION_OF_CHROMATIN_MODIFICATION		81	0.34094	1.35335	0.124	0.228017	1	4296	tags=41%, list=23%, signal=53%
GO_POSITIVE_REGULATION_OF_PROTEASOMAL_PROTEIN_CATABOLIC_PROCESS	GO_POSITIVE_REGULATION_OF_PROTEASOMAL_PROTEIN_CATABOLIC_PROCESS		95	0.338166	1.35304	0.110454	0.228135	1	4965	tags=48%, list=27%, signal=66%
GO_REGULATION_OF_DNA_TEMPLATED_TRANSCRIPTION_INITIATION	GO_REGULATION_OF_DNA_TEMPLATED_TRANSCRIPTION_INITIATION		31	0.40889	1.35245	0.140316	0.228547	1	4627	tags=52%, list=25%, signal=68%
GO_REGULATION_OF_NFAT_PROTEIN_IMPORT_INTO_NUCLEUS	GO_REGULATION_OF_NFAT_PROTEIN_IMPORT_INTO_NUCLEUS		16	0.445578	1.35182	0.135922	0.228952	1	3423	tags=38%, list=18%, signal=46%
GO_NEUTRAL_LIPID_BIOSYNTHETIC_PROCESS	GO_NEUTRAL_LIPID_BIOSYNTHETIC_PROCESS		27	0.438018	1.3504	0.126	0.230285	1	6588	tags=59%, list=35%, signal=91%
GO_PROTEIN_PHOSPHATASE_2A_BINDING	GO_PROTEIN_PHOSPHATASE_2A_BINDING		27	0.418682	1.34987	0.134269	0.230634	1	6260	tags=56%, list=33%, signal=83%
GO_REGULATION_OF_RETINOIC_ACID_RECEPTOR_SIGNALING_PATHWAY	GO_REGULATION_OF_RETINOIC_ACID_RECEPTOR_SIGNALING_PATHWAY		19	0.443727	1.34888	0.135246	0.23152	1	5356	tags=37%, list=29%, signal=52%
GO_NEURON_DEATH	GO_NEURON_DEATH		46	0.34663	1.34824	0.0810277	0.232014	1	3322	tags=35%, list=18%, signal=42%
GO_PALMITOYLTRANSFERASE_ACTIVITY	GO_PALMITOYLTRANSFERASE_ACTIVITY		36	0.385049	1.348	0.120155	0.232037	1	4995	tags=47%, list=27%, signal=64%
GO_REGULATION_OF_PROTEIN_PHOSPHATASE_TYPE_2A_ACTIVITY	GO_REGULATION_OF_PROTEIN_PHOSPHATASE_TYPE_2A_ACTIVITY		23	0.449174	1.34701	0.148	0.232941	1	5308	tags=57%, list=28%, signal=79%
GO_IMMUNOGLOBULIN_PRODUCTION	GO_IMMUNOGLOBULIN_PRODUCTION		41	0.443077	1.34654	0.157895	0.2332	1	5368	tags=49%, list=29%, signal=68%
GO_RNA_POLYMERASE_BINDING	GO_RNA_POLYMERASE_BINDING		32	0.422059	1.34595	0.144578	0.233656	1	4092	tags=41%, list=22%, signal=52%
GO_CELLULAR_RESPONSE_TO_AMINO_ACID_STARVATION	GO_CELLULAR_RESPONSE_TO_AMINO_ACID_STARVATION		24	0.411819	1.34536	0.133745	0.23406	1	4003	tags=38%, list=21%, signal=48%
GO_REGULATION_OF_INTRINSIC_APOPTOTIC_SIGNALING_PATHWAY	GO_REGULATION_OF_INTRINSIC_APOPTOTIC_SIGNALING_PATHWAY		134	0.326728	1.34481	0.0936255	0.234423	1	5979	tags=45%, list=32%, signal=65%
GO_CENTROSOME_DUPLICATION	GO_CENTROSOME_DUPLICATION		31	0.468692	1.34381	0.186235	0.23529	1	4994	tags=61%, list=27%, signal=83%
GO_GLUTAMINE_FAMILY_AMINO_ACID_CATABOLIC_PROCESS	GO_GLUTAMINE_FAMILY_AMINO_ACID_CATABOLIC_PROCESS		24	0.424231	1.34371	0.118852	0.23515	1	1274	tags=21%, list=7%, signal=22%
GO_NUCLEOTIDE_KINASE_ACTIVITY	GO_NUCLEOTIDE_KINASE_ACTIVITY		24	0.400018	1.34246	0.114108	0.236364	1	1688	tags=29%, list=9%, signal=32%
GO_RETROGRADE_TRANSPORT_ENDOSOME_TO_GOLGI	GO_RETROGRADE_TRANSPORT_ENDOSOME_TO_GOLGI		65	0.360939	1.34239	0.116022	0.236203	1	3695	tags=37%, list=20%, signal=46%
GO_MANNOSYLATION	GO_MANNOSYLATION		29	0.425331	1.34192	0.156746	0.236466	1	4165	tags=45%, list=22%, signal=58%
GO_ANTIGEN_PROCESSING_AND_PRESENTATION	GO_ANTIGEN_PROCESSING_AND_PRESENTATION		206	0.345829	1.34121	0.16047	0.236964	1	4509	tags=38%, list=24%, signal=50%
GO_RESPONSE_TO_FOOD	GO_RESPONSE_TO_FOOD		19	0.451041	1.33997	0.0949495	0.238095	1	3100	tags=32%, list=17%, signal=38%
GO_REGULATION_OF_ACTIN_NUCLEATION	GO_REGULATION_OF_ACTIN_NUCLEATION		26	0.405643	1.33893	0.117886	0.239005	1	3873	tags=42%, list=21%, signal=53%
GO_ARGININE_METABOLIC_PROCESS	GO_ARGININE_METABOLIC_PROCESS		17	0.447362	1.33803	0.136456	0.239754	1	4135	tags=35%, list=22%, signal=45%
GO_CENTRIOLAR_SATELLITE	GO_CENTRIOLAR_SATELLITE		24	0.424757	1.33794	0.147177	0.239607	1	4718	tags=42%, list=25%, signal=56%
GO_REGULATION_OF_TRANSCRIPTION_FROM_RNA_POLYMERASE_I_PROMOTER	GO_REGULATION_OF_TRANSCRIPTION_FROM_RNA_POLYMERASE_I_PROMOTER		23	0.459188	1.33713	0.15678	0.24032	1	3802	tags=48%, list=20%, signal=60%
GO_NAD_DEPENDENT_PROTEIN_DEACETYLASE_ACTIVITY	GO_NAD_DEPENDENT_PROTEIN_DEACETYLASE_ACTIVITY		17	0.459638	1.33668	0.145349	0.240586	1	5195	tags=53%, list=28%, signal=73%
GO_FMN_BINDING	GO_FMN_BINDING		15	0.470476	1.33634	0.128205	0.240725	1	5540	tags=53%, list=30%, signal=76%
GO_DNA_REPLICATION_FACTOR_A_COMPLEX	GO_DNA_REPLICATION_FACTOR_A_COMPLEX		15	0.482724	1.33531	0.157791	0.241657	1	5844	tags=60%, list=31%, signal=87%
GO_HISTONE_LYSINE_N_METHYLTRANSFERASE_ACTIVITY	GO_HISTONE_LYSINE_N_METHYLTRANSFERASE_ACTIVITY		35	0.396561	1.33427	0.15261	0.242582	1	5951	tags=54%, list=32%, signal=79%
GO_GLUTAMATE_METABOLIC_PROCESS	GO_GLUTAMATE_METABOLIC_PROCESS		28	0.421802	1.33419	0.133603	0.242408	1	7602	tags=61%, list=41%, signal=102%
GO_OXIDOREDUCTASE_ACTIVITY_ACTING_ON_THE_CH_OH_GROUP_OF_DONORS_NAD_OR_NADP_AS_ACCEPTOR	GO_OXIDOREDUCTASE_ACTIVITY_ACTING_ON_THE_CH_OH_GROUP_OF_DONORS_NAD_OR_NADP_AS_ACCEPTOR		110	0.359718	1.33297	0.164356	0.243563	1	4775	tags=38%, list=26%, signal=51%
GO_ALCOHOL_BIOSYNTHETIC_PROCESS	GO_ALCOHOL_BIOSYNTHETIC_PROCESS		109	0.32789	1.33266	0.103516	0.243653	1	5826	tags=45%, list=31%, signal=65%
GO_NUCLEAR_LOCALIZATION_SEQUENCE_BINDING	GO_NUCLEAR_LOCALIZATION_SEQUENCE_BINDING		20	0.477414	1.33236	0.172619	0.243747	1	4391	tags=50%, list=23%, signal=65%
GO_PROTEIN_KINASE_COMPLEX	GO_PROTEIN_KINASE_COMPLEX		89	0.322517	1.33217	0.103448	0.243712	1	6144	tags=54%, list=33%, signal=80%
GO_HISTONE_H3_DEACETYLATION	GO_HISTONE_H3_DEACETYLATION		22	0.426447	1.33151	0.151093	0.244196	1	5325	tags=55%, list=28%, signal=76%
GO_REGULATION_OF_MAMMARY_GLAND_EPITHELIAL_CELL_PROLIFERATION	GO_REGULATION_OF_MAMMARY_GLAND_EPITHELIAL_CELL_PROLIFERATION		16	0.442907	1.33149	0.1611	0.24399	1	5938	tags=69%, list=32%, signal=101%
GO_NEGATIVE_REGULATION_OF_MEGAKARYOCYTE_DIFFERENTIATION	GO_NEGATIVE_REGULATION_OF_MEGAKARYOCYTE_DIFFERENTIATION		18	0.525739	1.3314	0.198819	0.243836	1	4717	tags=44%, list=25%, signal=59%
GO_POLY_PURINE_TRACT_BINDING	GO_POLY_PURINE_TRACT_BINDING		18	0.485748	1.33121	0.176471	0.243812	1	2637	tags=50%, list=14%, signal=58%
GO_REGULATION_OF_MEGAKARYOCYTE_DIFFERENTIATION	GO_REGULATION_OF_MEGAKARYOCYTE_DIFFERENTIATION		28	0.430941	1.33073	0.175403	0.244094	1	3573	tags=36%, list=19%, signal=44%
GO_PROTON_TRANSPORTING_TWO_SECTOR_ATPASE_COMPLEX	GO_PROTON_TRANSPORTING_TWO_SECTOR_ATPASE_COMPLEX		47	0.454555	1.32906	0.211765	0.245712	1	5439	tags=51%, list=29%, signal=72%
GO_REGULATION_OF_TYPE_I_INTERFERON_PRODUCTION	GO_REGULATION_OF_TYPE_I_INTERFERON_PRODUCTION		107	0.362987	1.32904	0.13786	0.245485	1	5925	tags=50%, list=32%, signal=73%
GO_POSITIVE_REGULATION_OF_CANONICAL_WNT_SIGNALING_PATHWAY	GO_POSITIVE_REGULATION_OF_CANONICAL_WNT_SIGNALING_PATHWAY		117	0.328669	1.32849	0.14375	0.245869	1	4342	tags=44%, list=23%, signal=56%
GO_FEMALE_MEIOTIC_DIVISION	GO_FEMALE_MEIOTIC_DIVISION		22	0.429856	1.32774	0.133466	0.246424	1	4142	tags=45%, list=22%, signal=58%
GO_INTESTINAL_ABSORPTION	GO_INTESTINAL_ABSORPTION		26	0.469732	1.32715	0.161224	0.246825	1	2528	tags=35%, list=14%, signal=40%
GO_H4_HISTONE_ACETYLTRANSFERASE_COMPLEX	GO_H4_HISTONE_ACETYLTRANSFERASE_COMPLEX		17	0.45167	1.32649	0.145129	0.247329	1	6288	tags=53%, list=34%, signal=80%
GO_COATED_MEMBRANE	GO_COATED_MEMBRANE		82	0.344529	1.32597	0.145251	0.24767	1	4833	tags=41%, list=26%, signal=56%
GO_POSITIVE_REGULATION_OF_VIRAL_GENOME_REPLICATION	GO_POSITIVE_REGULATION_OF_VIRAL_GENOME_REPLICATION		29	0.39702	1.32509	0.153061	0.248419	1	2627	tags=38%, list=14%, signal=44%
GO_PROTEIN_STABILIZATION	GO_PROTEIN_STABILIZATION		126	0.314983	1.32494	0.0975143	0.248354	1	4909	tags=38%, list=26%, signal=51%
GO_ACTIVATION_OF_CYSTEINE_TYPE_ENDOPEPTIDASE_ACTIVITY	GO_ACTIVATION_OF_CYSTEINE_TYPE_ENDOPEPTIDASE_ACTIVITY		92	0.331991	1.32413	0.130612	0.24905	1	2615	tags=26%, list=14%, signal=30%
GO_LIGAND_DEPENDENT_NUCLEAR_RECEPTOR_TRANSCRIPTION_COACTIVATOR_ACTIVITY	GO_LIGAND_DEPENDENT_NUCLEAR_RECEPTOR_TRANSCRIPTION_COACTIVATOR_ACTIVITY		51	0.354788	1.32149	0.145418	0.251724	1	5947	tags=63%, list=32%, signal=92%
GO_PHOSPHOLIPID_BIOSYNTHETIC_PROCESS	GO_PHOSPHOLIPID_BIOSYNTHETIC_PROCESS		227	0.286922	1.32123	0.0902111	0.251755	1	4724	tags=33%, list=25%, signal=44%
GO_CELL_AGING	GO_CELL_AGING		67	0.318933	1.3207	0.109127	0.252105	1	4439	tags=36%, list=24%, signal=47%
GO_CLATHRIN_ADAPTOR_COMPLEX	GO_CLATHRIN_ADAPTOR_COMPLEX		27	0.424679	1.3205	0.153846	0.252097	1	6649	tags=67%, list=36%, signal=103%
GO_NONRIBOSOMAL_PEPTIDE_BIOSYNTHETIC_PROCESS	GO_NONRIBOSOMAL_PEPTIDE_BIOSYNTHETIC_PROCESS		16	0.482234	1.32047	0.157676	0.251891	1	4480	tags=56%, list=24%, signal=74%
GO_PROTEIN_HOMOTETRAMERIZATION	GO_PROTEIN_HOMOTETRAMERIZATION		58	0.348895	1.3202	0.114108	0.25195	1	4338	tags=41%, list=23%, signal=54%
GO_MANNOSYLTRANSFERASE_ACTIVITY	GO_MANNOSYLTRANSFERASE_ACTIVITY		24	0.437681	1.31906	0.159919	0.253018	1	6949	tags=71%, list=37%, signal=113%
GO_INTRINSIC_APOPTOTIC_SIGNALING_PATHWAY	GO_INTRINSIC_APOPTOTIC_SIGNALING_PATHWAY		147	0.305765	1.31867	0.0994036	0.253176	1	5304	tags=43%, list=28%, signal=59%
GO_CHROMATIN_BINDING	GO_CHROMATIN_BINDING		414	0.304257	1.31809	0.122984	0.253583	1	5425	tags=41%, list=29%, signal=56%
GO_INTRINSIC_COMPONENT_OF_ORGANELLE_MEMBRANE	GO_INTRINSIC_COMPONENT_OF_ORGANELLE_MEMBRANE		243	0.308491	1.31775	0.126984	0.253764	1	5830	tags=46%, list=31%, signal=65%
GO_SINGLE_ORGANISM_MEMBRANE_BUDDING	GO_SINGLE_ORGANISM_MEMBRANE_BUDDING		71	0.380131	1.31682	0.160985	0.254556	1	6883	tags=61%, list=37%, signal=95%
GO_UBIQUITIN_LIGASE_COMPLEX	GO_UBIQUITIN_LIGASE_COMPLEX		250	0.296521	1.31601	0.114563	0.255226	1	5289	tags=42%, list=28%, signal=58%
GO_MICROTUBULE_BASED_MOVEMENT	GO_MICROTUBULE_BASED_MOVEMENT		192	0.306066	1.31488	0.119919	0.256273	1	4756	tags=32%, list=25%, signal=42%
GO_INTRACELLULAR_STEROID_HORMONE_RECEPTOR_SIGNALING_PATHWAY	GO_INTRACELLULAR_STEROID_HORMONE_RECEPTOR_SIGNALING_PATHWAY		67	0.333486	1.31463	0.120818	0.256308	1	5049	tags=42%, list=27%, signal=57%
GO_REGULATION_OF_PROTEIN_COMPLEX_ASSEMBLY	GO_REGULATION_OF_PROTEIN_COMPLEX_ASSEMBLY		350	0.275585	1.31198	0.094	0.259013	1	5988	tags=44%, list=32%, signal=64%
GO_PHOSPHOLIPASE_BINDING	GO_PHOSPHOLIPASE_BINDING		18	0.432824	1.31196	0.144578	0.258775	1	788	tags=22%, list=4%, signal=23%
GO_PROTEIN_IMPORT_INTO_NUCLEUS_TRANSLOCATION	GO_PROTEIN_IMPORT_INTO_NUCLEUS_TRANSLOCATION		28	0.407737	1.31122	0.161554	0.259403	1	3379	tags=36%, list=18%, signal=44%
GO_REGULATION_OF_RESPONSE_TO_INTERFERON_GAMMA	GO_REGULATION_OF_RESPONSE_TO_INTERFERON_GAMMA		22	0.462478	1.3109	0.19798	0.259517	1	7298	tags=68%, list=39%, signal=112%
GO_POLYOL_BIOSYNTHETIC_PROCESS	GO_POLYOL_BIOSYNTHETIC_PROCESS		26	0.394248	1.31009	0.122605	0.260214	1	4919	tags=42%, list=26%, signal=57%
GO_ANDROGEN_RECEPTOR_SIGNALING_PATHWAY	GO_ANDROGEN_RECEPTOR_SIGNALING_PATHWAY		40	0.37791	1.30937	0.140351	0.260798	1	5049	tags=45%, list=27%, signal=62%
GO_DEMETHYLATION	GO_DEMETHYLATION		51	0.349658	1.30783	0.136187	0.262328	1	6980	tags=51%, list=37%, signal=81%
GO_HISTONE_PHOSPHORYLATION	GO_HISTONE_PHOSPHORYLATION		24	0.411132	1.30763	0.155206	0.262321	1	1242	tags=33%, list=7%, signal=36%
GO_TRANSCRIPTION_FACTOR_COMPLEX	GO_TRANSCRIPTION_FACTOR_COMPLEX		293	0.27804	1.30737	0.0910931	0.262361	1	5504	tags=40%, list=29%, signal=55%
GO_NEGATIVE_REGULATION_OF_TRANSFERASE_ACTIVITY	GO_NEGATIVE_REGULATION_OF_TRANSFERASE_ACTIVITY		342	0.277355	1.30599	0.0998043	0.263732	1	4364	tags=36%, list=23%, signal=46%
GO_ASPARTATE_FAMILY_AMINO_ACID_CATABOLIC_PROCESS	GO_ASPARTATE_FAMILY_AMINO_ACID_CATABOLIC_PROCESS		16	0.469507	1.3054	0.162946	0.26416	1	3936	tags=44%, list=21%, signal=55%
GO_POLYOL_METABOLIC_PROCESS	GO_POLYOL_METABOLIC_PROCESS		93	0.304227	1.30528	0.0927022	0.264027	1	6044	tags=43%, list=32%, signal=63%
GO_LIGASE_ACTIVITY_FORMING_CARBON_SULFUR_BONDS	GO_LIGASE_ACTIVITY_FORMING_CARBON_SULFUR_BONDS		39	0.382811	1.3051	0.147177	0.263986	1	5074	tags=46%, list=27%, signal=63%
GO_TRANSCRIPTIONALLY_ACTIVE_CHROMATIN	GO_TRANSCRIPTIONALLY_ACTIVE_CHROMATIN		17	0.427596	1.30492	0.149495	0.263948	1	5374	tags=47%, list=29%, signal=66%
GO_NEGATIVE_REGULATION_OF_INTRINSIC_APOPTOTIC_SIGNALING_PATHWAY	GO_NEGATIVE_REGULATION_OF_INTRINSIC_APOPTOTIC_SIGNALING_PATHWAY		81	0.34166	1.30317	0.143137	0.265673	1	3999	tags=36%, list=21%, signal=45%
GO_CELLULAR_RESPONSE_TO_TOPOLOGICALLY_INCORRECT_PROTEIN	GO_CELLULAR_RESPONSE_TO_TOPOLOGICALLY_INCORRECT_PROTEIN		113	0.345436	1.30171	0.198039	0.267134	1	6854	tags=57%, list=37%, signal=89%
GO_BAF_TYPE_COMPLEX	GO_BAF_TYPE_COMPLEX		23	0.430967	1.30069	0.171206	0.268079	1	4031	tags=39%, list=22%, signal=50%
GO_SPERM_EGG_RECOGNITION	GO_SPERM_EGG_RECOGNITION		43	0.409293	1.29813	0.191667	0.270796	1	3855	tags=26%, list=21%, signal=32%
GO_GERM_CELL_NUCLEUS	GO_GERM_CELL_NUCLEUS		15	0.45224	1.29792	0.160714	0.270802	1	4142	tags=40%, list=22%, signal=51%
GO_NEGATIVE_REGULATION_OF_RESPONSE_TO_DNA_DAMAGE_STIMULUS	GO_NEGATIVE_REGULATION_OF_RESPONSE_TO_DNA_DAMAGE_STIMULUS		49	0.355906	1.29783	0.140115	0.270656	1	5776	tags=49%, list=31%, signal=71%
GO_REGULATION_OF_RELEASE_OF_CYTOCHROME_C_FROM_MITOCHONDRIA	GO_REGULATION_OF_RELEASE_OF_CYTOCHROME_C_FROM_MITOCHONDRIA		42	0.379392	1.29726	0.177062	0.271067	1	5979	tags=60%, list=32%, signal=87%
GO_MYELIN_SHEATH	GO_MYELIN_SHEATH		162	0.332172	1.29723	0.175649	0.270838	1	2531	tags=35%, list=14%, signal=40%
GO_NEGATIVE_REGULATION_OF_LIPID_BIOSYNTHETIC_PROCESS	GO_NEGATIVE_REGULATION_OF_LIPID_BIOSYNTHETIC_PROCESS		42	0.354886	1.29627	0.143389	0.271768	1	6145	tags=48%, list=33%, signal=71%
GO_UBIQUITIN_LIKE_PROTEIN_CONJUGATING_ENZYME_ACTIVITY	GO_UBIQUITIN_LIKE_PROTEIN_CONJUGATING_ENZYME_ACTIVITY		29	0.443027	1.29481	0.192946	0.273247	1	4837	tags=55%, list=26%, signal=74%
GO_NEGATIVE_REGULATION_OF_CELLULAR_CATABOLIC_PROCESS	GO_NEGATIVE_REGULATION_OF_CELLULAR_CATABOLIC_PROCESS		148	0.289125	1.29467	0.097166	0.273173	1	4377	tags=36%, list=23%, signal=47%
GO_HISTONE_DEACETYLASE_BINDING	GO_HISTONE_DEACETYLASE_BINDING		103	0.318206	1.29412	0.139394	0.27354	1	4045	tags=38%, list=22%, signal=48%
GO_SPERM_CAPACITATION	GO_SPERM_CAPACITATION		15	0.46187	1.29217	0.178279	0.275611	1	4559	tags=40%, list=24%, signal=53%
GO_HISTONE_H3_ACETYLATION	GO_HISTONE_H3_ACETYLATION		41	0.372496	1.29142	0.152918	0.276209	1	5504	tags=46%, list=29%, signal=66%
GO_REGULATION_OF_DNA_RECOMBINATION	GO_REGULATION_OF_DNA_RECOMBINATION		53	0.374425	1.29115	0.184891	0.276274	1	4170	tags=36%, list=22%, signal=46%
GO_RESPONSE_TO_ARSENIC_CONTAINING_SUBSTANCE	GO_RESPONSE_TO_ARSENIC_CONTAINING_SUBSTANCE		29	0.394718	1.28984	0.152047	0.277548	1	2764	tags=28%, list=15%, signal=32%
GO_OUTER_MEMBRANE	GO_OUTER_MEMBRANE		168	0.285299	1.28847	0.12024	0.278921	1	3782	tags=31%, list=20%, signal=38%
GO_NEGATIVE_REGULATION_OF_APOPTOTIC_SIGNALING_PATHWAY	GO_NEGATIVE_REGULATION_OF_APOPTOTIC_SIGNALING_PATHWAY		189	0.299168	1.28845	0.126273	0.278683	1	3999	tags=32%, list=21%, signal=40%
GO_REGULATION_OF_PROTEIN_OLIGOMERIZATION	GO_REGULATION_OF_PROTEIN_OLIGOMERIZATION		29	0.371876	1.28823	0.128514	0.278654	1	6267	tags=45%, list=33%, signal=67%
GO_CELLULAR_LIPID_CATABOLIC_PROCESS	GO_CELLULAR_LIPID_CATABOLIC_PROCESS		148	0.322508	1.28763	0.158954	0.279099	1	7048	tags=51%, list=38%, signal=82%
GO_VESICLE_TARGETING	GO_VESICLE_TARGETING		75	0.366667	1.2875	0.179048	0.27899	1	6550	tags=53%, list=35%, signal=82%
GO_REGULATION_OF_RECEPTOR_BIOSYNTHETIC_PROCESS	GO_REGULATION_OF_RECEPTOR_BIOSYNTHETIC_PROCESS		21	0.394821	1.2865	0.152893	0.279933	1	5195	tags=57%, list=28%, signal=79%
GO_NUCLEOTIDE_BINDING_DOMAIN_LEUCINE_RICH_REPEAT_CONTAINING_RECEPTOR_SIGNALING_PATHWAY	GO_NUCLEOTIDE_BINDING_DOMAIN_LEUCINE_RICH_REPEAT_CONTAINING_RECEPTOR_SIGNALING_PATHWAY		27	0.411084	1.28446	0.168675	0.282081	1	5047	tags=52%, list=27%, signal=71%
GO_ANTIGEN_PROCESSING_AND_PRESENTATION_OF_PEPTIDE_OR_POLYSACCHARIDE_ANTIGEN_VIA_MHC_CLASS_II	GO_ANTIGEN_PROCESSING_AND_PRESENTATION_OF_PEPTIDE_OR_POLYSACCHARIDE_ANTIGEN_VIA_MHC_CLASS_II		88	0.347277	1.28387	0.195266	0.282509	1	4109	tags=31%, list=22%, signal=39%
GO_ORGANELLE_LOCALIZATION	GO_ORGANELLE_LOCALIZATION		394	0.266002	1.2836	0.119772	0.282601	1	3739	tags=28%, list=20%, signal=34%
GO_ANTEROGRADE_AXONAL_TRANSPORT	GO_ANTEROGRADE_AXONAL_TRANSPORT		22	0.405327	1.2816	0.167969	0.284793	1	7229	tags=55%, list=39%, signal=89%
GO_CIRCADIAN_REGULATION_OF_GENE_EXPRESSION	GO_CIRCADIAN_REGULATION_OF_GENE_EXPRESSION		53	0.327474	1.28153	0.150101	0.28459	1	5325	tags=42%, list=28%, signal=58%
GO_ALPHA_AMINO_ACID_CATABOLIC_PROCESS	GO_ALPHA_AMINO_ACID_CATABOLIC_PROCESS		90	0.329109	1.28106	0.15304	0.28487	1	4535	tags=33%, list=24%, signal=44%
GO_SPERMATID_NUCLEUS_DIFFERENTIATION	GO_SPERMATID_NUCLEUS_DIFFERENTIATION		15	0.458561	1.28082	0.183432	0.28492	1	5445	tags=60%, list=29%, signal=85%
GO_POSITIVE_REGULATION_OF_DNA_TEMPLATED_TRANSCRIPTION_INITIATION	GO_POSITIVE_REGULATION_OF_DNA_TEMPLATED_TRANSCRIPTION_INITIATION		24	0.401263	1.2791	0.182731	0.286749	1	4518	tags=50%, list=24%, signal=66%
GO_MITOCHONDRIAL_ELECTRON_TRANSPORT_CYTOCHROME_C_TO_OXYGEN	GO_MITOCHONDRIAL_ELECTRON_TRANSPORT_CYTOCHROME_C_TO_OXYGEN		16	0.581813	1.27632	0.242363	0.289966	1	4315	tags=69%, list=23%, signal=89%
GO_MICROTUBULE_POLYMERIZATION_OR_DEPOLYMERIZATION	GO_MICROTUBULE_POLYMERIZATION_OR_DEPOLYMERIZATION		39	0.377619	1.27527	0.192698	0.291029	1	3610	tags=38%, list=19%, signal=48%
GO_INTRINSIC_APOPTOTIC_SIGNALING_PATHWAY_IN_RESPONSE_TO_DNA_DAMAGE_BY_P53_CLASS_MEDIATOR	GO_INTRINSIC_APOPTOTIC_SIGNALING_PATHWAY_IN_RESPONSE_TO_DNA_DAMAGE_BY_P53_CLASS_MEDIATOR		29	0.401892	1.27334	0.179435	0.293088	1	5979	tags=55%, list=32%, signal=81%
GO_ER_TO_GOLGI_VESICLE_MEDIATED_TRANSPORT	GO_ER_TO_GOLGI_VESICLE_MEDIATED_TRANSPORT		159	0.330957	1.273	0.182857	0.293224	1	6550	tags=53%, list=35%, signal=81%
GO_REGULATION_OF_SYMBIOSIS_ENCOMPASSING_MUTUALISM_THROUGH_PARASITISM	GO_REGULATION_OF_SYMBIOSIS_ENCOMPASSING_MUTUALISM_THROUGH_PARASITISM		190	0.315182	1.27126	0.154639	0.295138	1	4429	tags=35%, list=24%, signal=45%
GO_ESTABLISHMENT_OF_MITOTIC_SPINDLE_ORIENTATION	GO_ESTABLISHMENT_OF_MITOTIC_SPINDLE_ORIENTATION		19	0.428121	1.27087	0.177515	0.295329	1	1780	tags=32%, list=10%, signal=35%
GO_REGULATION_OF_ENDOPLASMIC_RETICULUM_STRESS_INDUCED_INTRINSIC_APOPTOTIC_SIGNALING_PATHWAY	GO_REGULATION_OF_ENDOPLASMIC_RETICULUM_STRESS_INDUCED_INTRINSIC_APOPTOTIC_SIGNALING_PATHWAY		27	0.401376	1.27085	0.175337	0.29508	1	6658	tags=63%, list=36%, signal=98%
GO_HISTONE_DEACETYLASE_COMPLEX	GO_HISTONE_DEACETYLASE_COMPLEX		60	0.339502	1.27085	0.171026	0.294807	1	5377	tags=45%, list=29%, signal=63%
GO_HYDROGEN_ION_TRANSMEMBRANE_TRANSPORT	GO_HYDROGEN_ION_TRANSMEMBRANE_TRANSPORT		100	0.37479	1.27055	0.228516	0.294916	1	6252	tags=53%, list=33%, signal=79%
GO_AP_TYPE_MEMBRANE_COAT_ADAPTOR_COMPLEX	GO_AP_TYPE_MEMBRANE_COAT_ADAPTOR_COMPLEX		36	0.374917	1.26981	0.183712	0.295558	1	4833	tags=42%, list=26%, signal=56%
GO_ASPARTATE_FAMILY_AMINO_ACID_BIOSYNTHETIC_PROCESS	GO_ASPARTATE_FAMILY_AMINO_ACID_BIOSYNTHETIC_PROCESS		23	0.430212	1.26701	0.215321	0.29887	1	6276	tags=70%, list=34%, signal=105%
GO_ROUGH_ENDOPLASMIC_RETICULUM_MEMBRANE	GO_ROUGH_ENDOPLASMIC_RETICULUM_MEMBRANE		19	0.445593	1.26659	0.192015	0.299111	1	6590	tags=63%, list=35%, signal=97%
GO_TRANSCRIPTIONAL_REPRESSOR_COMPLEX	GO_TRANSCRIPTIONAL_REPRESSOR_COMPLEX		74	0.333116	1.26588	0.192982	0.299713	1	5377	tags=45%, list=29%, signal=62%
GO_HYDROGEN_TRANSPORT	GO_HYDROGEN_TRANSPORT		131	0.340028	1.26362	0.206287	0.302311	1	6252	tags=49%, list=33%, signal=73%
GO_BETA_CATENIN_TCF_COMPLEX_ASSEMBLY	GO_BETA_CATENIN_TCF_COMPLEX_ASSEMBLY		42	0.372156	1.26247	0.203922	0.303494	1	5182	tags=48%, list=28%, signal=66%
GO_CELL_REDOX_HOMEOSTASIS	GO_CELL_REDOX_HOMEOSTASIS		62	0.358909	1.26192	0.212371	0.303897	1	4135	tags=35%, list=22%, signal=45%
GO_OXIDOREDUCTASE_ACTIVITY_ACTING_ON_THE_ALDEHYDE_OR_OXO_GROUP_OF_DONORS_NAD_OR_NADP_AS_ACCEPTOR	GO_OXIDOREDUCTASE_ACTIVITY_ACTING_ON_THE_ALDEHYDE_OR_OXO_GROUP_OF_DONORS_NAD_OR_NADP_AS_ACCEPTOR		34	0.386838	1.26035	0.193294	0.305517	1	4504	tags=38%, list=24%, signal=50%
GO_UDP_GALACTOSYLTRANSFERASE_ACTIVITY	GO_UDP_GALACTOSYLTRANSFERASE_ACTIVITY		25	0.404911	1.25948	0.193798	0.30634	1	6471	tags=60%, list=35%, signal=92%
GO_GALACTOSYLTRANSFERASE_ACTIVITY	GO_GALACTOSYLTRANSFERASE_ACTIVITY		29	0.385092	1.25886	0.181467	0.306834	1	6471	tags=59%, list=35%, signal=89%
GO_V_D_J_RECOMBINATION	GO_V_D_J_RECOMBINATION		15	0.485892	1.25708	0.214429	0.30877	1	4053	tags=47%, list=22%, signal=60%
GO_ORGANELLE_DISASSEMBLY	GO_ORGANELLE_DISASSEMBLY		176	0.266194	1.25572	0.110895	0.310289	1	4608	tags=36%, list=25%, signal=48%
GO_CELLULAR_AMINO_ACID_CATABOLIC_PROCESS	GO_CELLULAR_AMINO_ACID_CATABOLIC_PROCESS		107	0.312347	1.25359	0.152263	0.312703	1	5746	tags=39%, list=31%, signal=56%
GO_ACTIN_NUCLEATION	GO_ACTIN_NUCLEATION		21	0.415082	1.25292	0.222892	0.31328	1	5273	tags=62%, list=28%, signal=86%
GO_NEGATIVE_REGULATION_OF_PROTEIN_BINDING	GO_NEGATIVE_REGULATION_OF_PROTEIN_BINDING		78	0.295806	1.25251	0.149606	0.313516	1	5371	tags=50%, list=29%, signal=70%
GO_REGULATION_OF_CELLULAR_RESPIRATION	GO_REGULATION_OF_CELLULAR_RESPIRATION		22	0.39094	1.252	0.181102	0.313845	1	4181	tags=36%, list=22%, signal=47%
GO_POSITIVE_REGULATION_OF_TRANSCRIPTION_FROM_RNA_POLYMERASE_II_PROMOTER_IN_RESPONSE_TO_STRESS	GO_POSITIVE_REGULATION_OF_TRANSCRIPTION_FROM_RNA_POLYMERASE_II_PROMOTER_IN_RESPONSE_TO_STRESS		21	0.405586	1.25172	0.205941	0.313953	1	5413	tags=38%, list=29%, signal=54%
GO_CELLULAR_RESPONSE_TO_IONIZING_RADIATION	GO_CELLULAR_RESPONSE_TO_IONIZING_RADIATION		50	0.331497	1.24973	0.197154	0.316315	1	2131	tags=30%, list=11%, signal=34%
GO_NLS_BEARING_PROTEIN_IMPORT_INTO_NUCLEUS	GO_NLS_BEARING_PROTEIN_IMPORT_INTO_NUCLEUS		22	0.435305	1.24918	0.238835	0.316674	1	5232	tags=55%, list=28%, signal=76%
GO_ORGANOPHOSPHATE_ESTER_TRANSPORT	GO_ORGANOPHOSPHATE_ESTER_TRANSPORT		85	0.317045	1.24866	0.149621	0.317075	1	4806	tags=35%, list=26%, signal=47%
GO_REGULATION_OF_APOPTOTIC_SIGNALING_PATHWAY	GO_REGULATION_OF_APOPTOTIC_SIGNALING_PATHWAY		347	0.274801	1.24822	0.134269	0.317344	1	4026	tags=31%, list=22%, signal=39%
GO_THIOL_DEPENDENT_UBIQUITIN_SPECIFIC_PROTEASE_ACTIVITY	GO_THIOL_DEPENDENT_UBIQUITIN_SPECIFIC_PROTEASE_ACTIVITY		70	0.346567	1.24624	0.210421	0.319594	1	5542	tags=49%, list=30%, signal=69%
GO_CYTOPLASMIC_MICROTUBULE_ORGANIZATION	GO_CYTOPLASMIC_MICROTUBULE_ORGANIZATION		39	0.347219	1.24578	0.187251	0.319938	1	6172	tags=54%, list=33%, signal=80%
GO_PROTEIN_KINASE_A_REGULATORY_SUBUNIT_BINDING	GO_PROTEIN_KINASE_A_REGULATORY_SUBUNIT_BINDING		16	0.427349	1.24459	0.203095	0.321237	1	2364	tags=38%, list=13%, signal=43%
GO_AXON_CYTOPLASM	GO_AXON_CYTOPLASM		29	0.36625	1.24434	0.201536	0.321264	1	6102	tags=41%, list=33%, signal=61%
GO_NEGATIVE_REGULATION_OF_CATABOLIC_PROCESS	GO_NEGATIVE_REGULATION_OF_CATABOLIC_PROCESS		194	0.268171	1.24222	0.132797	0.323727	1	4377	tags=33%, list=23%, signal=43%
GO_REGULATION_OF_CYTOSKELETON_ORGANIZATION	GO_REGULATION_OF_CYTOSKELETON_ORGANIZATION		473	0.253111	1.24162	0.128155	0.324221	1	4030	tags=34%, list=22%, signal=42%
GO_NUCLEAR_NUCLEOSOME	GO_NUCLEAR_NUCLEOSOME		37	0.483806	1.23952	0.286307	0.326681	1	5977	tags=57%, list=32%, signal=83%
GO_RESPONSE_TO_TUMOR_NECROSIS_FACTOR	GO_RESPONSE_TO_TUMOR_NECROSIS_FACTOR		222	0.312444	1.2378	0.196242	0.328656	1	4595	tags=35%, list=25%, signal=46%
GO_NEGATIVE_REGULATION_OF_HISTONE_ACETYLATION	GO_NEGATIVE_REGULATION_OF_HISTONE_ACETYLATION		15	0.429565	1.23754	0.218	0.32871	1	980	tags=27%, list=5%, signal=28%
GO_PHOSPHATASE_BINDING	GO_PHOSPHATASE_BINDING		159	0.282886	1.23515	0.170974	0.331634	1	5513	tags=42%, list=29%, signal=58%
GO_BLASTOCYST_FORMATION	GO_BLASTOCYST_FORMATION		29	0.358047	1.23507	0.179916	0.33145	1	2089	tags=28%, list=11%, signal=31%
GO_REGULATION_OF_TUMOR_NECROSIS_FACTOR_MEDIATED_SIGNALING_PATHWAY	GO_REGULATION_OF_TUMOR_NECROSIS_FACTOR_MEDIATED_SIGNALING_PATHWAY		45	0.334089	1.23443	0.174699	0.331992	1	7239	tags=64%, list=39%, signal=105%
GO_ESC_E_Z_COMPLEX	GO_ESC_E_Z_COMPLEX		16	0.457307	1.23431	0.25813	0.331836	1	3215	tags=50%, list=17%, signal=60%
GO_TRANSCRIPTION_INITIATION_FROM_RNA_POLYMERASE_II_PROMOTER	GO_TRANSCRIPTION_INITIATION_FROM_RNA_POLYMERASE_II_PROMOTER		152	0.27118	1.23265	0.129845	0.333726	1	5259	tags=43%, list=28%, signal=60%
GO_NUCLEAR_TRANSCRIPTIONAL_REPRESSOR_COMPLEX	GO_NUCLEAR_TRANSCRIPTIONAL_REPRESSOR_COMPLEX		22	0.408577	1.23182	0.22736	0.334548	1	3894	tags=41%, list=21%, signal=52%
GO_METHYLATED_HISTONE_BINDING	GO_METHYLATED_HISTONE_BINDING		48	0.369819	1.2314	0.225549	0.33481	1	6810	tags=56%, list=36%, signal=88%
GO_HYDROLASE_ACTIVITY_ACTING_ON_GLYCOSYL_BONDS	GO_HYDROLASE_ACTIVITY_ACTING_ON_GLYCOSYL_BONDS		113	0.294803	1.23125	0.148594	0.334697	1	4397	tags=27%, list=24%, signal=36%
GO_LYMPHOCYTE_APOPTOTIC_PROCESS	GO_LYMPHOCYTE_APOPTOTIC_PROCESS		18	0.429608	1.23115	0.242972	0.334529	1	4896	tags=56%, list=26%, signal=75%
GO_RETINOIC_ACID_RECEPTOR_BINDING	GO_RETINOIC_ACID_RECEPTOR_BINDING		31	0.357259	1.23036	0.223553	0.335319	1	5947	tags=45%, list=32%, signal=66%
GO_REGULATION_OF_GLUCOSE_TRANSPORT	GO_REGULATION_OF_GLUCOSE_TRANSPORT		93	0.294853	1.2293	0.170543	0.336479	1	3393	tags=32%, list=18%, signal=39%
GO_CELLULAR_RESPONSE_TO_HEAT	GO_CELLULAR_RESPONSE_TO_HEAT		34	0.351607	1.22842	0.199597	0.337342	1	3215	tags=32%, list=17%, signal=39%
GO_GENETIC_IMPRINTING	GO_GENETIC_IMPRINTING		20	0.409658	1.22826	0.194779	0.337252	1	2817	tags=35%, list=15%, signal=41%
GO_PEROXISOMAL_TRANSPORT	GO_PEROXISOMAL_TRANSPORT		18	0.421545	1.22715	0.209581	0.338449	1	3161	tags=33%, list=17%, signal=40%
GO_SYNAPSIS	GO_SYNAPSIS		30	0.393987	1.22688	0.236686	0.338478	1	7133	tags=43%, list=38%, signal=70%
GO_CHD_TYPE_COMPLEX	GO_CHD_TYPE_COMPLEX		17	0.427168	1.22623	0.225933	0.33903	1	3894	tags=47%, list=21%, signal=59%
GO_OXIDOREDUCTASE_ACTIVITY_ACTING_ON_CH_OH_GROUP_OF_DONORS	GO_OXIDOREDUCTASE_ACTIVITY_ACTING_ON_CH_OH_GROUP_OF_DONORS		131	0.319147	1.22599	0.217647	0.339046	1	6052	tags=45%, list=32%, signal=66%
GO_RESPONSE_TO_LIGHT_STIMULUS	GO_RESPONSE_TO_LIGHT_STIMULUS		266	0.246739	1.22419	0.122772	0.341207	1	4896	tags=30%, list=26%, signal=40%
GO_NEGATIVE_REGULATION_OF_RELEASE_OF_CYTOCHROME_C_FROM_MITOCHONDRIA	GO_NEGATIVE_REGULATION_OF_RELEASE_OF_CYTOCHROME_C_FROM_MITOCHONDRIA		16	0.435925	1.2236	0.248047	0.341711	1	3685	tags=50%, list=20%, signal=62%
GO_T_CELL_APOPTOTIC_PROCESS	GO_T_CELL_APOPTOTIC_PROCESS		15	0.45021	1.22343	0.258449	0.341642	1	2375	tags=40%, list=13%, signal=46%
GO_LACTATION	GO_LACTATION		39	0.334731	1.22271	0.186475	0.3423	1	2871	tags=28%, list=15%, signal=33%
GO_UBIQUITIN_LIKE_PROTEIN_LIGASE_ACTIVITY	GO_UBIQUITIN_LIKE_PROTEIN_LIGASE_ACTIVITY		192	0.277684	1.22161	0.187867	0.343475	1	6704	tags=51%, list=36%, signal=78%
GO_NEGATIVE_REGULATION_OF_EXTRINSIC_APOPTOTIC_SIGNALING_PATHWAY_VIA_DEATH_DOMAIN_RECEPTORS	GO_NEGATIVE_REGULATION_OF_EXTRINSIC_APOPTOTIC_SIGNALING_PATHWAY_VIA_DEATH_DOMAIN_RECEPTORS		34	0.373306	1.21946	0.217822	0.345984	1	3669	tags=32%, list=20%, signal=40%
GO_INTERACTION_WITH_SYMBIONT	GO_INTERACTION_WITH_SYMBIONT		51	0.336226	1.21542	0.202429	0.351218	1	5743	tags=41%, list=31%, signal=59%
GO_ENDOMEMBRANE_SYSTEM_ORGANIZATION	GO_ENDOMEMBRANE_SYSTEM_ORGANIZATION		448	0.253727	1.21485	0.153242	0.351695	1	3763	tags=30%, list=20%, signal=37%
GO_NUCLEOTIDE_SUGAR_BIOSYNTHETIC_PROCESS	GO_NUCLEOTIDE_SUGAR_BIOSYNTHETIC_PROCESS		19	0.441691	1.21454	0.246964	0.35182	1	2986	tags=42%, list=16%, signal=50%
GO_LEUKOCYTE_APOPTOTIC_PROCESS	GO_LEUKOCYTE_APOPTOTIC_PROCESS		22	0.414245	1.21365	0.236626	0.352752	1	4896	tags=50%, list=26%, signal=68%
GO_LATERAL_PLASMA_MEMBRANE	GO_LATERAL_PLASMA_MEMBRANE		48	0.335026	1.21327	0.220408	0.352986	1	3413	tags=31%, list=18%, signal=38%
GO_HOMOLOGOUS_CHROMOSOME_SEGREGATION	GO_HOMOLOGOUS_CHROMOSOME_SEGREGATION		39	0.370221	1.2132	0.238289	0.352763	1	4142	tags=31%, list=22%, signal=39%
GO_REGULATION_OF_TOR_SIGNALING	GO_REGULATION_OF_TOR_SIGNALING		64	0.305892	1.21162	0.194	0.354673	1	5699	tags=47%, list=30%, signal=67%
GO_CIRCADIAN_RHYTHM	GO_CIRCADIAN_RHYTHM		132	0.264302	1.21014	0.146293	0.35645	1	5325	tags=37%, list=28%, signal=52%
GO_RNA_POLYMERASE_II_CORE_PROMOTER_SEQUENCE_SPECIFIC_DNA_BINDING	GO_RNA_POLYMERASE_II_CORE_PROMOTER_SEQUENCE_SPECIFIC_DNA_BINDING		53	0.313063	1.20872	0.178295	0.358059	1	2557	tags=25%, list=14%, signal=28%
GO_PROTEIN_DEALKYLATION	GO_PROTEIN_DEALKYLATION		26	0.40318	1.20819	0.237052	0.358489	1	5806	tags=46%, list=31%, signal=67%
GO_HISTONE_H4_ACETYLATION	GO_HISTONE_H4_ACETYLATION		42	0.342021	1.20673	0.231518	0.360145	1	5803	tags=45%, list=31%, signal=65%
GO_PROTEIN_LOCALIZATION_TO_NUCLEUS	GO_PROTEIN_LOCALIZATION_TO_NUCLEUS		151	0.283835	1.20673	0.182711	0.359837	1	6042	tags=48%, list=32%, signal=70%
GO_CELLULAR_SENESCENCE	GO_CELLULAR_SENESCENCE		33	0.33867	1.20671	0.215726	0.359542	1	7400	tags=55%, list=40%, signal=90%
GO_RECYCLING_ENDOSOME	GO_RECYCLING_ENDOSOME		117	0.283354	1.20488	0.182674	0.361789	1	5079	tags=38%, list=27%, signal=51%
GO_PROTEIN_PHOSPHATASE_1_BINDING	GO_PROTEIN_PHOSPHATASE_1_BINDING		19	0.383196	1.20468	0.245243	0.361751	1	3754	tags=37%, list=20%, signal=46%
GO_ENDOPLASMIC_RETICULUM_GOLGI_INTERMEDIATE_COMPARTMENT	GO_ENDOPLASMIC_RETICULUM_GOLGI_INTERMEDIATE_COMPARTMENT		96	0.316754	1.20423	0.245681	0.362098	1	6754	tags=55%, list=36%, signal=86%
GO_MANGANESE_ION_BINDING	GO_MANGANESE_ION_BINDING		44	0.313692	1.20386	0.180723	0.362317	1	2746	tags=27%, list=15%, signal=32%
GO_HEPATICOBILIARY_SYSTEM_DEVELOPMENT	GO_HEPATICOBILIARY_SYSTEM_DEVELOPMENT		126	0.272166	1.20359	0.137066	0.362366	1	2246	tags=20%, list=12%, signal=22%
GO_ESTROGEN_RECEPTOR_BINDING	GO_ESTROGEN_RECEPTOR_BINDING		37	0.331238	1.20221	0.219608	0.363964	1	3243	tags=35%, list=17%, signal=42%
GO_PROTEIN_PHOSPHATASE_BINDING	GO_PROTEIN_PHOSPHATASE_BINDING		117	0.27948	1.20084	0.195609	0.365521	1	5480	tags=43%, list=29%, signal=60%
GO_RESPONSE_TO_IRON_ION	GO_RESPONSE_TO_IRON_ION		35	0.334549	1.20064	0.199234	0.365472	1	2596	tags=29%, list=14%, signal=33%
GO_PROTEIN_TARGETING_TO_MEMBRANE	GO_PROTEIN_TARGETING_TO_MEMBRANE		155	0.378562	1.20007	0.328094	0.365962	1	6728	tags=65%, list=36%, signal=100%
GO_PROTEIN_DEPHOSPHORYLATION	GO_PROTEIN_DEPHOSPHORYLATION		181	0.26232	1.19993	0.183099	0.365839	1	3520	tags=27%, list=19%, signal=32%
GO_MOTOR_ACTIVITY	GO_MOTOR_ACTIVITY		129	0.293681	1.19951	0.197183	0.3661	1	4756	tags=32%, list=25%, signal=42%
GO_IMMUNOGLOBULIN_PRODUCTION_INVOLVED_IN_IMMUNOGLOBULIN_MEDIATED_IMMUNE_RESPONSE	GO_IMMUNOGLOBULIN_PRODUCTION_INVOLVED_IN_IMMUNOGLOBULIN_MEDIATED_IMMUNE_RESPONSE		22	0.426122	1.19854	0.264646	0.367146	1	5368	tags=45%, list=29%, signal=64%
GO_REGULATION_OF_CYSTEINE_TYPE_ENDOPEPTIDASE_ACTIVITY	GO_REGULATION_OF_CYSTEINE_TYPE_ENDOPEPTIDASE_ACTIVITY		208	0.268927	1.19671	0.215886	0.369394	1	3826	tags=28%, list=20%, signal=35%
GO_NEGATIVE_REGULATION_OF_PROTEIN_ACETYLATION	GO_NEGATIVE_REGULATION_OF_PROTEIN_ACETYLATION		21	0.386334	1.19648	0.255952	0.369391	1	4405	tags=43%, list=24%, signal=56%
GO_CATION_TRANSPORTING_ATPASE_ACTIVITY	GO_CATION_TRANSPORTING_ATPASE_ACTIVITY		59	0.334163	1.19645	0.228963	0.369109	1	5439	tags=42%, list=29%, signal=60%
GO_HYDROGEN_EXPORTING_ATPASE_ACTIVITY	GO_HYDROGEN_EXPORTING_ATPASE_ACTIVITY		27	0.407318	1.1961	0.286282	0.369301	1	8754	tags=74%, list=47%, signal=139%
GO_POSITIVE_REGULATION_OF_LAMELLIPODIUM_ASSEMBLY	GO_POSITIVE_REGULATION_OF_LAMELLIPODIUM_ASSEMBLY		15	0.418145	1.19516	0.250482	0.370282	1	3423	tags=27%, list=18%, signal=33%
GO_PROTEIN_REFOLDING	GO_PROTEIN_REFOLDING		19	0.480023	1.19288	0.301181	0.373184	1	6282	tags=63%, list=34%, signal=95%
GO_PROTON_TRANSPORTING_TWO_SECTOR_ATPASE_COMPLEX_CATALYTIC_DOMAIN	GO_PROTON_TRANSPORTING_TWO_SECTOR_ATPASE_COMPLEX_CATALYTIC_DOMAIN		17	0.447216	1.19237	0.279612	0.37362	1	6137	tags=47%, list=33%, signal=70%
GO_AMINE_BIOSYNTHETIC_PROCESS	GO_AMINE_BIOSYNTHETIC_PROCESS		20	0.389592	1.19223	0.2537	0.373508	1	3809	tags=35%, list=20%, signal=44%
GO_PROTEIN_HETEROOLIGOMERIZATION	GO_PROTEIN_HETEROOLIGOMERIZATION		109	0.288287	1.19187	0.201663	0.373664	1	5884	tags=47%, list=31%, signal=68%
GO_CELLULAR_RESPONSE_TO_ANTIBIOTIC	GO_CELLULAR_RESPONSE_TO_ANTIBIOTIC		16	0.41784	1.19165	0.222664	0.37367	1	4867	tags=44%, list=26%, signal=59%
GO_POST_TRANSLATIONAL_PROTEIN_MODIFICATION	GO_POST_TRANSLATIONAL_PROTEIN_MODIFICATION		33	0.348898	1.19094	0.242	0.374373	1	6100	tags=45%, list=33%, signal=67%
GO_CHAPERONE_MEDIATED_PROTEIN_FOLDING	GO_CHAPERONE_MEDIATED_PROTEIN_FOLDING		45	0.340288	1.18914	0.239437	0.376527	1	5764	tags=49%, list=31%, signal=70%
GO_DRUG_TRANSMEMBRANE_TRANSPORT	GO_DRUG_TRANSMEMBRANE_TRANSPORT		19	0.39453	1.18802	0.238683	0.377795	1	2141	tags=26%, list=11%, signal=30%
GO_CELLULAR_RESPONSE_TO_DSRNA	GO_CELLULAR_RESPONSE_TO_DSRNA		33	0.333797	1.18792	0.238994	0.377607	1	3985	tags=33%, list=21%, signal=42%
GO_GLYCEROLIPID_BIOSYNTHETIC_PROCESS	GO_GLYCEROLIPID_BIOSYNTHETIC_PROCESS		204	0.256331	1.1877	0.174329	0.37758	1	5989	tags=39%, list=32%, signal=56%
GO_SULFUR_AMINO_ACID_METABOLIC_PROCESS	GO_SULFUR_AMINO_ACID_METABOLIC_PROCESS		40	0.348323	1.18729	0.215768	0.377821	1	6154	tags=60%, list=33%, signal=89%
GO_CELLULAR_RESPONSE_TO_INTERLEUKIN_4	GO_CELLULAR_RESPONSE_TO_INTERLEUKIN_4		24	0.377454	1.18472	0.240404	0.381262	1	3747	tags=33%, list=20%, signal=42%
GO_INTRINSIC_APOPTOTIC_SIGNALING_PATHWAY_BY_P53_CLASS_MEDIATOR	GO_INTRINSIC_APOPTOTIC_SIGNALING_PATHWAY_BY_P53_CLASS_MEDIATOR		52	0.314535	1.18419	0.226908	0.381715	1	5979	tags=48%, list=32%, signal=70%
GO_NUCLEOPHAGY	GO_NUCLEOPHAGY		17	0.416797	1.18282	0.278	0.383291	1	7517	tags=59%, list=40%, signal=98%
GO_2_OXOGLUTARATE_METABOLIC_PROCESS	GO_2_OXOGLUTARATE_METABOLIC_PROCESS		19	0.406453	1.18274	0.276	0.383079	1	4558	tags=63%, list=24%, signal=83%
GO_POSITIVE_REGULATION_OF_CELL_DIVISION	GO_POSITIVE_REGULATION_OF_CELL_DIVISION		119	0.269734	1.18263	0.202062	0.382908	1	2833	tags=25%, list=15%, signal=30%
GO_ENDOPLASMIC_RETICULUM_TO_CYTOSOL_TRANSPORT	GO_ENDOPLASMIC_RETICULUM_TO_CYTOSOL_TRANSPORT		21	0.401997	1.18222	0.282609	0.383176	1	4897	tags=48%, list=26%, signal=64%
GO_PROTEIN_C_TERMINUS_BINDING	GO_PROTEIN_C_TERMINUS_BINDING		183	0.251281	1.17982	0.189394	0.386265	1	3567	tags=28%, list=19%, signal=34%
GO_PHOSPHOPROTEIN_BINDING	GO_PHOSPHOPROTEIN_BINDING		59	0.290161	1.17932	0.238748	0.386707	1	5569	tags=47%, list=30%, signal=67%
GO_CYSTEINE_TYPE_ENDOPEPTIDASE_ACTIVITY	GO_CYSTEINE_TYPE_ENDOPEPTIDASE_ACTIVITY		80	0.297196	1.17768	0.223819	0.388787	1	5815	tags=43%, list=31%, signal=61%
GO_PROTEIN_LOCALIZATION_TO_VACUOLE	GO_PROTEIN_LOCALIZATION_TO_VACUOLE		42	0.355102	1.1771	0.271881	0.389276	1	7161	tags=62%, list=38%, signal=100%
GO_REGULATION_OF_ERAD_PATHWAY	GO_REGULATION_OF_ERAD_PATHWAY		26	0.368596	1.17665	0.271375	0.389608	1	4233	tags=35%, list=23%, signal=45%
GO_NEGATIVE_REGULATION_OF_ERBB_SIGNALING_PATHWAY	GO_NEGATIVE_REGULATION_OF_ERBB_SIGNALING_PATHWAY		44	0.337568	1.17611	0.275591	0.39004	1	6866	tags=61%, list=37%, signal=97%
GO_POSITIVE_REGULATION_OF_TOR_SIGNALING	GO_POSITIVE_REGULATION_OF_TOR_SIGNALING		26	0.353774	1.17365	0.280561	0.393169	1	5699	tags=54%, list=30%, signal=77%
GO_NEGATIVE_REGULATION_OF_TOR_SIGNALING	GO_NEGATIVE_REGULATION_OF_TOR_SIGNALING		30	0.349794	1.17345	0.284274	0.393105	1	5294	tags=47%, list=28%, signal=65%
GO_REGULATION_OF_ORGANELLE_ASSEMBLY	GO_REGULATION_OF_ORGANELLE_ASSEMBLY		141	0.270709	1.17284	0.242718	0.393678	1	6129	tags=43%, list=33%, signal=64%
GO_TRANSCRIPTION_COACTIVATOR_ACTIVITY	GO_TRANSCRIPTION_COACTIVATOR_ACTIVITY		290	0.250307	1.17217	0.187008	0.39431	1	5109	tags=37%, list=27%, signal=50%
GO_MODULATION_OF_TRANSCRIPTION_IN_OTHER_ORGANISM_INVOLVED_IN_SYMBIOTIC_INTERACTION	GO_MODULATION_OF_TRANSCRIPTION_IN_OTHER_ORGANISM_INVOLVED_IN_SYMBIOTIC_INTERACTION		22	0.356202	1.17197	0.267823	0.39427	1	5743	tags=50%, list=31%, signal=72%
GO_LAMIN_BINDING	GO_LAMIN_BINDING		17	0.384769	1.17092	0.246063	0.395491	1	2329	tags=35%, list=12%, signal=40%
GO_VACUOLAR_TRANSPORT	GO_VACUOLAR_TRANSPORT		230	0.276345	1.17067	0.267925	0.39551	1	6104	tags=45%, list=33%, signal=66%
GO_MULTI_ORGANISM_MEMBRANE_ORGANIZATION	GO_MULTI_ORGANISM_MEMBRANE_ORGANIZATION		29	0.37794	1.17004	0.286869	0.39613	1	6237	tags=59%, list=33%, signal=88%
GO_RESPONSE_TO_TOPOLOGICALLY_INCORRECT_PROTEIN	GO_RESPONSE_TO_TOPOLOGICALLY_INCORRECT_PROTEIN		153	0.293895	1.16971	0.266019	0.396287	1	6640	tags=55%, list=35%, signal=84%
GO_STEROL_BIOSYNTHETIC_PROCESS	GO_STEROL_BIOSYNTHETIC_PROCESS		42	0.376391	1.1697	0.304519	0.395969	1	6618	tags=60%, list=35%, signal=92%
GO_REGULATION_OF_PROTEIN_TARGETING_TO_MITOCHONDRION	GO_REGULATION_OF_PROTEIN_TARGETING_TO_MITOCHONDRION		91	0.26493	1.16907	0.210117	0.396545	1	6559	tags=47%, list=35%, signal=72%
GO_LUNG_CELL_DIFFERENTIATION	GO_LUNG_CELL_DIFFERENTIATION		25	0.363189	1.16839	0.250493	0.397185	1	3581	tags=32%, list=19%, signal=40%
GO_DEATH_RECEPTOR_ACTIVITY	GO_DEATH_RECEPTOR_ACTIVITY		23	0.404051	1.16827	0.268191	0.397006	1	4305	tags=35%, list=23%, signal=45%
GO_CIS_TRANS_ISOMERASE_ACTIVITY	GO_CIS_TRANS_ISOMERASE_ACTIVITY		43	0.350333	1.1669	0.2827	0.398617	1	7208	tags=58%, list=39%, signal=94%
GO_REGULATION_OF_OXIDATIVE_STRESS_INDUCED_CELL_DEATH	GO_REGULATION_OF_OXIDATIVE_STRESS_INDUCED_CELL_DEATH		41	0.338615	1.16544	0.267327	0.400403	1	5195	tags=41%, list=28%, signal=57%
GO_ESTABLISHMENT_OF_PROTEIN_LOCALIZATION_TO_MEMBRANE	GO_ESTABLISHMENT_OF_PROTEIN_LOCALIZATION_TO_MEMBRANE		261	0.298906	1.16349	0.300578	0.402871	1	6729	tags=56%, list=36%, signal=87%
GO_ALDITOL_PHOSPHATE_METABOLIC_PROCESS	GO_ALDITOL_PHOSPHATE_METABOLIC_PROCESS		34	0.346487	1.16236	0.265469	0.404186	1	6920	tags=53%, list=37%, signal=84%
GO_GOLGI_TO_VACUOLE_TRANSPORT	GO_GOLGI_TO_VACUOLE_TRANSPORT		25	0.399684	1.16037	0.288973	0.406819	1	6565	tags=52%, list=35%, signal=80%
GO_REGULATION_OF_INTRINSIC_APOPTOTIC_SIGNALING_PATHWAY_IN_RESPONSE_TO_DNA_DAMAGE	GO_REGULATION_OF_INTRINSIC_APOPTOTIC_SIGNALING_PATHWAY_IN_RESPONSE_TO_DNA_DAMAGE		32	0.340465	1.1599	0.289575	0.40722	1	4439	tags=41%, list=24%, signal=53%
GO_REGULATION_OF_NIK_NF_KAPPAB_SIGNALING	GO_REGULATION_OF_NIK_NF_KAPPAB_SIGNALING		41	0.322117	1.15982	0.247967	0.407011	1	2097	tags=22%, list=11%, signal=25%
GO_REGULATION_OF_INTRACELLULAR_ESTROGEN_RECEPTOR_SIGNALING_PATHWAY	GO_REGULATION_OF_INTRACELLULAR_ESTROGEN_RECEPTOR_SIGNALING_PATHWAY		24	0.35279	1.15964	0.285992	0.406938	1	3666	tags=50%, list=20%, signal=62%
GO_RELEASE_OF_CYTOCHROME_C_FROM_MITOCHONDRIA	GO_RELEASE_OF_CYTOCHROME_C_FROM_MITOCHONDRIA		22	0.386017	1.15963	0.297872	0.406614	1	5979	tags=55%, list=32%, signal=80%
GO_HYDROLASE_ACTIVITY_ACTING_ON_CARBON_NITROGEN_BUT_NOT_PEPTIDE_BONDS_IN_CYCLIC_AMIDINES	GO_HYDROLASE_ACTIVITY_ACTING_ON_CARBON_NITROGEN_BUT_NOT_PEPTIDE_BONDS_IN_CYCLIC_AMIDINES		33	0.353989	1.15942	0.274428	0.406608	1	4571	tags=36%, list=24%, signal=48%
GO_MULTICELLULAR_ORGANISM_AGING	GO_MULTICELLULAR_ORGANISM_AGING		30	0.318677	1.15846	0.250988	0.407721	1	5268	tags=43%, list=28%, signal=60%
GO_GLUTATHIONE_METABOLIC_PROCESS	GO_GLUTATHIONE_METABOLIC_PROCESS		55	0.324804	1.1583	0.247967	0.407615	1	4680	tags=40%, list=25%, signal=53%
GO_HORMONE_RECEPTOR_BINDING	GO_HORMONE_RECEPTOR_BINDING		151	0.253152	1.15813	0.215385	0.407532	1	5965	tags=43%, list=32%, signal=63%
GO_RESPONSE_TO_CADMIUM_ION	GO_RESPONSE_TO_CADMIUM_ION		40	0.333714	1.15674	0.284861	0.409242	1	3715	tags=28%, list=20%, signal=34%
GO_GTPASE_BINDING	GO_GTPASE_BINDING		284	0.262479	1.15621	0.260784	0.409676	1	3565	tags=27%, list=19%, signal=33%
GO_POSITIVE_REGULATION_OF_RELEASE_OF_CYTOCHROME_C_FROM_MITOCHONDRIA	GO_POSITIVE_REGULATION_OF_RELEASE_OF_CYTOCHROME_C_FROM_MITOCHONDRIA		27	0.360069	1.15487	0.289109	0.411352	1	5979	tags=56%, list=32%, signal=82%
GO_OXIDOREDUCTASE_ACTIVITY_ACTING_ON_PAIRED_DONORS_WITH_INCORPORATION_OR_REDUCTION_OF_MOLECULAR_OXYGEN_2_OXOGLUTARATE_AS_ONE_DONOR_AND_INCORPORATION_OF_ONE_ATOM_EACH_OF_OXYGEN_INTO_BOTH_DONORS	GO_OXIDOREDUCTASE_ACTIVITY_ACTING_ON_PAIRED_DONORS_WITH_INCORPORATION_OR_REDUCTION_OF_MOLECULAR_OXYGEN_2_OXOGLUTARATE_AS_ONE_DONOR_AND_INCORPORATION_OF_ONE_ATOM_EACH_OF_OXYGEN_INTO_BOTH_DONORS		38	0.337777	1.1542	0.28373	0.411973	1	6276	tags=53%, list=34%, signal=79%
GO_POSITIVE_REGULATION_OF_APOPTOTIC_SIGNALING_PATHWAY	GO_POSITIVE_REGULATION_OF_APOPTOTIC_SIGNALING_PATHWAY		165	0.270135	1.15379	0.245436	0.412229	1	5311	tags=40%, list=28%, signal=55%
GO_SUGAR_TRANSMEMBRANE_TRANSPORTER_ACTIVITY	GO_SUGAR_TRANSMEMBRANE_TRANSPORTER_ACTIVITY		32	0.339335	1.15164	0.28	0.415102	1	6094	tags=41%, list=33%, signal=60%
GO_REGULATION_OF_STEROID_BIOSYNTHETIC_PROCESS	GO_REGULATION_OF_STEROID_BIOSYNTHETIC_PROCESS		48	0.31024	1.151	0.256121	0.415674	1	5419	tags=42%, list=29%, signal=59%
GO_LIPOPROTEIN_METABOLIC_PROCESS	GO_LIPOPROTEIN_METABOLIC_PROCESS		122	0.275061	1.14987	0.224806	0.417018	1	3776	tags=27%, list=20%, signal=34%
GO_MICROTUBULE_NUCLEATION	GO_MICROTUBULE_NUCLEATION		18	0.405459	1.14976	0.28655	0.416859	1	3610	tags=39%, list=19%, signal=48%
GO_GOLGI_ORGANIZATION	GO_GOLGI_ORGANIZATION		83	0.319091	1.14943	0.271484	0.416992	1	5903	tags=53%, list=32%, signal=77%
GO_BRUSH_BORDER	GO_BRUSH_BORDER		102	0.298468	1.14889	0.294118	0.417456	1	4971	tags=37%, list=27%, signal=50%
GO_DEATH_RECEPTOR_BINDING	GO_DEATH_RECEPTOR_BINDING		16	0.39751	1.14825	0.276553	0.418057	1	6917	tags=75%, list=37%, signal=119%
GO_PROTEIN_LOCALIZATION_TO_GOLGI_APPARATUS	GO_PROTEIN_LOCALIZATION_TO_GOLGI_APPARATUS		32	0.359726	1.14808	0.295938	0.417967	1	6267	tags=47%, list=33%, signal=70%
GO_CYTOPLASMIC_PATTERN_RECOGNITION_RECEPTOR_SIGNALING_PATHWAY	GO_CYTOPLASMIC_PATTERN_RECOGNITION_RECEPTOR_SIGNALING_PATHWAY		32	0.352805	1.14656	0.311245	0.419944	1	6678	tags=56%, list=36%, signal=87%
GO_NEGATIVE_REGULATION_OF_PEPTIDYL_TYROSINE_PHOSPHORYLATION	GO_NEGATIVE_REGULATION_OF_PEPTIDYL_TYROSINE_PHOSPHORYLATION		37	0.311718	1.14565	0.278195	0.421026	1	3970	tags=43%, list=21%, signal=55%
GO_GLUCOSYLTRANSFERASE_ACTIVITY	GO_GLUCOSYLTRANSFERASE_ACTIVITY		16	0.409266	1.14372	0.2751	0.423563	1	3931	tags=44%, list=21%, signal=55%
GO_RETINOID_X_RECEPTOR_BINDING	GO_RETINOID_X_RECEPTOR_BINDING		17	0.385373	1.14368	0.294347	0.423268	1	5866	tags=47%, list=31%, signal=68%
GO_IRE1_MEDIATED_UNFOLDED_PROTEIN_RESPONSE	GO_IRE1_MEDIATED_UNFOLDED_PROTEIN_RESPONSE		53	0.344757	1.14341	0.323755	0.423331	1	6278	tags=57%, list=34%, signal=85%
GO_NAD_ADP_RIBOSYLTRANSFERASE_ACTIVITY	GO_NAD_ADP_RIBOSYLTRANSFERASE_ACTIVITY		26	0.359131	1.14314	0.305668	0.423369	1	4405	tags=35%, list=24%, signal=45%
GO_POSITIVE_REGULATION_OF_PROTEIN_OLIGOMERIZATION	GO_POSITIVE_REGULATION_OF_PROTEIN_OLIGOMERIZATION		17	0.40077	1.14307	0.302277	0.423154	1	5979	tags=41%, list=32%, signal=60%
GO_COPI_COATED_VESICLE_MEMBRANE	GO_COPI_COATED_VESICLE_MEMBRANE		16	0.445733	1.14248	0.329545	0.4237	1	6334	tags=88%, list=34%, signal=132%
GO_NEGATIVE_REGULATION_OF_RESPONSE_TO_ENDOPLASMIC_RETICULUM_STRESS	GO_NEGATIVE_REGULATION_OF_RESPONSE_TO_ENDOPLASMIC_RETICULUM_STRESS		34	0.35578	1.14063	0.291429	0.426172	1	6583	tags=53%, list=35%, signal=82%
GO_ENDOPLASMIC_RETICULUM_CALCIUM_ION_HOMEOSTASIS	GO_ENDOPLASMIC_RETICULUM_CALCIUM_ION_HOMEOSTASIS		20	0.396582	1.14032	0.314629	0.426315	1	5384	tags=60%, list=29%, signal=84%
GO_REGULATION_OF_OLIGODENDROCYTE_DIFFERENTIATION	GO_REGULATION_OF_OLIGODENDROCYTE_DIFFERENTIATION		28	0.341112	1.14017	0.253061	0.426193	1	5656	tags=46%, list=30%, signal=66%
GO_NEGATIVE_REGULATION_OF_CELL_CYCLE_ARREST	GO_NEGATIVE_REGULATION_OF_CELL_CYCLE_ARREST		18	0.367645	1.13918	0.289683	0.427254	1	5920	tags=56%, list=32%, signal=81%
GO_ORGANELLE_TRANSPORT_ALONG_MICROTUBULE	GO_ORGANELLE_TRANSPORT_ALONG_MICROTUBULE		54	0.29926	1.13889	0.290944	0.427337	1	6649	tags=50%, list=36%, signal=77%
GO_CELLULAR_COMPONENT_MAINTENANCE	GO_CELLULAR_COMPONENT_MAINTENANCE		18	0.369328	1.13853	0.291262	0.427518	1	3972	tags=50%, list=21%, signal=63%
GO_DYNEIN_BINDING	GO_DYNEIN_BINDING		25	0.358983	1.13852	0.304348	0.427185	1	3681	tags=28%, list=20%, signal=35%
GO_FATTY_ACID_LIGASE_ACTIVITY	GO_FATTY_ACID_LIGASE_ACTIVITY		16	0.380861	1.13674	0.300626	0.429541	1	4080	tags=38%, list=22%, signal=48%
GO_PROTEIN_LOCALIZATION_TO_CYTOSKELETON	GO_PROTEIN_LOCALIZATION_TO_CYTOSKELETON		28	0.36407	1.13665	0.296223	0.429333	1	5001	tags=50%, list=27%, signal=68%
GO_OXIDOREDUCTASE_ACTIVITY_ACTING_ON_A_HEME_GROUP_OF_DONORS	GO_OXIDOREDUCTASE_ACTIVITY_ACTING_ON_A_HEME_GROUP_OF_DONORS		24	0.436424	1.13521	0.343811	0.431179	1	6252	tags=75%, list=33%, signal=112%
GO_NEGATIVE_REGULATION_OF_DEPHOSPHORYLATION	GO_NEGATIVE_REGULATION_OF_DEPHOSPHORYLATION		68	0.27184	1.13517	0.246988	0.430884	1	4862	tags=34%, list=26%, signal=46%
GO_MITOGEN_ACTIVATED_PROTEIN_KINASE_KINASE_BINDING	GO_MITOGEN_ACTIVATED_PROTEIN_KINASE_KINASE_BINDING		16	0.393047	1.13513	0.303922	0.430599	1	5944	tags=50%, list=32%, signal=73%
GO_GLUTAMINE_METABOLIC_PROCESS	GO_GLUTAMINE_METABOLIC_PROCESS		22	0.374818	1.13475	0.315488	0.430843	1	1689	tags=27%, list=9%, signal=30%
GO_EXTRINSIC_APOPTOTIC_SIGNALING_PATHWAY_VIA_DEATH_DOMAIN_RECEPTORS	GO_EXTRINSIC_APOPTOTIC_SIGNALING_PATHWAY_VIA_DEATH_DOMAIN_RECEPTORS		38	0.320649	1.13421	0.296078	0.431292	1	5716	tags=39%, list=31%, signal=57%
GO_ENDOCYTIC_RECYCLING	GO_ENDOCYTIC_RECYCLING		23	0.370132	1.13357	0.300589	0.431869	1	5635	tags=57%, list=30%, signal=81%
GO_POSITIVE_REGULATION_OF_ORGANELLE_ASSEMBLY	GO_POSITIVE_REGULATION_OF_ORGANELLE_ASSEMBLY		42	0.309834	1.13254	0.293279	0.433108	1	5768	tags=40%, list=31%, signal=58%
GO_MHC_CLASS_I_PROTEIN_BINDING	GO_MHC_CLASS_I_PROTEIN_BINDING		19	0.433284	1.12883	0.349301	0.438439	1	5204	tags=53%, list=28%, signal=73%
GO_REGULATION_OF_LAMELLIPODIUM_ORGANIZATION	GO_REGULATION_OF_LAMELLIPODIUM_ORGANIZATION		33	0.328868	1.12864	0.312741	0.438358	1	3423	tags=30%, list=18%, signal=37%
GO_NEGATIVE_REGULATION_OF_VIRAL_PROCESS	GO_NEGATIVE_REGULATION_OF_VIRAL_PROCESS		84	0.311933	1.128	0.325956	0.438962	1	1107	tags=15%, list=6%, signal=16%
GO_INORGANIC_ANION_EXCHANGER_ACTIVITY	GO_INORGANIC_ANION_EXCHANGER_ACTIVITY		20	0.406627	1.12615	0.362573	0.441577	1	3028	tags=15%, list=16%, signal=18%
GO_APOPTOTIC_SIGNALING_PATHWAY	GO_APOPTOTIC_SIGNALING_PATHWAY		282	0.243682	1.12559	0.243137	0.442071	1	4896	tags=34%, list=26%, signal=45%
GO_REGULATION_OF_KERATINOCYTE_DIFFERENTIATION	GO_REGULATION_OF_KERATINOCYTE_DIFFERENTIATION		27	0.351621	1.12345	0.295181	0.444987	1	5919	tags=44%, list=32%, signal=65%
GO_GLYCOSIDE_METABOLIC_PROCESS	GO_GLYCOSIDE_METABOLIC_PROCESS		15	0.414144	1.12296	0.33002	0.445401	1	4536	tags=40%, list=24%, signal=53%
GO_FIBROBLAST_GROWTH_FACTOR_RECEPTOR_SIGNALING_PATHWAY	GO_FIBROBLAST_GROWTH_FACTOR_RECEPTOR_SIGNALING_PATHWAY		83	0.274645	1.12211	0.295585	0.446368	1	4457	tags=37%, list=24%, signal=49%
GO_ENDOPLASMIC_RETICULUM_GOLGI_INTERMEDIATE_COMPARTMENT_MEMBRANE	GO_ENDOPLASMIC_RETICULUM_GOLGI_INTERMEDIATE_COMPARTMENT_MEMBRANE		57	0.32671	1.1218	0.337209	0.446502	1	7257	tags=61%, list=39%, signal=100%
GO_NEGATIVE_REGULATION_OF_ENDOPLASMIC_RETICULUM_STRESS_INDUCED_INTRINSIC_APOPTOTIC_SIGNALING_PATHWAY	GO_NEGATIVE_REGULATION_OF_ENDOPLASMIC_RETICULUM_STRESS_INDUCED_INTRINSIC_APOPTOTIC_SIGNALING_PATHWAY		16	0.408967	1.12145	0.317647	0.446648	1	6423	tags=69%, list=34%, signal=105%
GO_CYTOSKELETON_DEPENDENT_INTRACELLULAR_TRANSPORT	GO_CYTOSKELETON_DEPENDENT_INTRACELLULAR_TRANSPORT		109	0.269919	1.12033	0.285156	0.448065	1	6123	tags=43%, list=33%, signal=64%
GO_PROTEIN_K48_LINKED_UBIQUITINATION	GO_PROTEIN_K48_LINKED_UBIQUITINATION		45	0.310698	1.11962	0.311891	0.448781	1	6297	tags=56%, list=34%, signal=84%
GO_METHIONINE_METABOLIC_PROCESS	GO_METHIONINE_METABOLIC_PROCESS		18	0.381871	1.1188	0.314629	0.449691	1	6154	tags=67%, list=33%, signal=99%
GO_POSITIVE_REGULATION_OF_CELLULAR_PROTEIN_LOCALIZATION	GO_POSITIVE_REGULATION_OF_CELLULAR_PROTEIN_LOCALIZATION		335	0.227146	1.11815	0.262327	0.45035	1	6459	tags=45%, list=35%, signal=68%
GO_MICROTUBULE_BINDING	GO_MICROTUBULE_BINDING		191	0.263881	1.11768	0.307536	0.450721	1	3873	tags=32%, list=21%, signal=40%
GO_INTRINSIC_COMPONENT_OF_MITOCHONDRIAL_OUTER_MEMBRANE	GO_INTRINSIC_COMPONENT_OF_MITOCHONDRIAL_OUTER_MEMBRANE		21	0.35576	1.11684	0.319688	0.451678	1	1589	tags=24%, list=8%, signal=26%
GO_CALCIUM_DEPENDENT_CYSTEINE_TYPE_ENDOPEPTIDASE_ACTIVITY	GO_CALCIUM_DEPENDENT_CYSTEINE_TYPE_ENDOPEPTIDASE_ACTIVITY		19	0.392674	1.11667	0.330661	0.451575	1	7519	tags=63%, list=40%, signal=105%
GO_EXOCYST	GO_EXOCYST		15	0.410348	1.11667	0.323232	0.45122	1	5106	tags=53%, list=27%, signal=73%
GO_NEGATIVE_REGULATION_OF_EPIDERMIS_DEVELOPMENT	GO_NEGATIVE_REGULATION_OF_EPIDERMIS_DEVELOPMENT		16	0.396541	1.11645	0.321499	0.451184	1	5354	tags=50%, list=29%, signal=70%
GO_NUCLEAR_INNER_MEMBRANE	GO_NUCLEAR_INNER_MEMBRANE		47	0.287928	1.11619	0.29207	0.451215	1	1311	tags=15%, list=7%, signal=16%
GO_OSTEOCLAST_DIFFERENTIATION	GO_OSTEOCLAST_DIFFERENTIATION		28	0.345894	1.11586	0.321012	0.45135	1	3814	tags=36%, list=20%, signal=45%
GO_ACID_THIOL_LIGASE_ACTIVITY	GO_ACID_THIOL_LIGASE_ACTIVITY		19	0.399665	1.1157	0.331301	0.451271	1	5074	tags=53%, list=27%, signal=72%
GO_STEROID_HORMONE_RECEPTOR_BINDING	GO_STEROID_HORMONE_RECEPTOR_BINDING		78	0.27794	1.11568	0.291089	0.450951	1	3309	tags=31%, list=18%, signal=37%
GO_CORE_PROMOTER_SEQUENCE_SPECIFIC_DNA_BINDING	GO_CORE_PROMOTER_SEQUENCE_SPECIFIC_DNA_BINDING		99	0.267656	1.11451	0.284884	0.452367	1	5425	tags=40%, list=29%, signal=57%
GO_ESTABLISHMENT_OF_LOCALIZATION_BY_MOVEMENT_ALONG_MICROTUBULE	GO_ESTABLISHMENT_OF_LOCALIZATION_BY_MOVEMENT_ALONG_MICROTUBULE		90	0.274465	1.11435	0.307544	0.452245	1	4756	tags=31%, list=25%, signal=42%
GO_CYTOPLASMIC_MICROTUBULE	GO_CYTOPLASMIC_MICROTUBULE		51	0.299863	1.11278	0.292731	0.454266	1	5195	tags=43%, list=28%, signal=60%
GO_GLYCOSYL_COMPOUND_CATABOLIC_PROCESS	GO_GLYCOSYL_COMPOUND_CATABOLIC_PROCESS		39	0.309295	1.11084	0.273085	0.456904	1	5578	tags=36%, list=30%, signal=51%
GO_NEGATIVE_REGULATION_OF_OXIDATIVE_STRESS_INDUCED_INTRINSIC_APOPTOTIC_SIGNALING_PATHWAY	GO_NEGATIVE_REGULATION_OF_OXIDATIVE_STRESS_INDUCED_INTRINSIC_APOPTOTIC_SIGNALING_PATHWAY		18	0.385938	1.10927	0.31992	0.45903	1	4969	tags=39%, list=27%, signal=53%
GO_NEGATIVE_REGULATION_OF_STEROID_METABOLIC_PROCESS	GO_NEGATIVE_REGULATION_OF_STEROID_METABOLIC_PROCESS		23	0.351271	1.10903	0.324427	0.459056	1	5347	tags=48%, list=29%, signal=67%
GO_GOLGI_ASSOCIATED_VESICLE_MEMBRANE	GO_GOLGI_ASSOCIATED_VESICLE_MEMBRANE		47	0.297948	1.10804	0.330754	0.460256	1	4833	tags=43%, list=26%, signal=57%
GO_CILIARY_BASAL_BODY	GO_CILIARY_BASAL_BODY		75	0.28504	1.10718	0.332	0.461273	1	6061	tags=47%, list=32%, signal=69%
GO_POSITIVE_REGULATION_OF_MITOCHONDRIAL_MEMBRANE_PERMEABILITY	GO_POSITIVE_REGULATION_OF_MITOCHONDRIAL_MEMBRANE_PERMEABILITY		18	0.364858	1.10539	0.324597	0.463766	1	5979	tags=44%, list=32%, signal=65%
GO_PROTEIN_MANNOSYLATION	GO_PROTEIN_MANNOSYLATION		17	0.385836	1.10484	0.344423	0.464267	1	4165	tags=41%, list=22%, signal=53%
GO_DEAMINASE_ACTIVITY	GO_DEAMINASE_ACTIVITY		32	0.327916	1.10455	0.298137	0.464329	1	4571	tags=38%, list=24%, signal=50%
GO_MITOGEN_ACTIVATED_PROTEIN_KINASE_KINASE_KINASE_BINDING	GO_MITOGEN_ACTIVATED_PROTEIN_KINASE_KINASE_KINASE_BINDING		18	0.350171	1.10436	0.325153	0.464283	1	1262	tags=22%, list=7%, signal=24%
GO_OXIDOREDUCTASE_ACTIVITY_ACTING_ON_THE_ALDEHYDE_OR_OXO_GROUP_OF_DONORS	GO_OXIDOREDUCTASE_ACTIVITY_ACTING_ON_THE_ALDEHYDE_OR_OXO_GROUP_OF_DONORS		44	0.328015	1.10411	0.346303	0.464341	1	5449	tags=41%, list=29%, signal=58%
GO_AMINOPEPTIDASE_ACTIVITY	GO_AMINOPEPTIDASE_ACTIVITY		40	0.289622	1.10315	0.323887	0.465458	1	3945	tags=28%, list=21%, signal=35%
GO_GUANOSINE_CONTAINING_COMPOUND_METABOLIC_PROCESS	GO_GUANOSINE_CONTAINING_COMPOUND_METABOLIC_PROCESS		44	0.281215	1.10088	0.306	0.468658	1	5970	tags=55%, list=32%, signal=80%
GO_PROTEIN_DESTABILIZATION	GO_PROTEIN_DESTABILIZATION		32	0.313309	1.10055	0.333333	0.468836	1	4355	tags=38%, list=23%, signal=49%
GO_PURINE_RIBONUCLEOSIDE_BISPHOSPHATE_METABOLIC_PROCESS	GO_PURINE_RIBONUCLEOSIDE_BISPHOSPHATE_METABOLIC_PROCESS		20	0.365529	1.0995	0.351889	0.470148	1	9156	tags=75%, list=49%, signal=147%
GO_REGULATION_OF_B_CELL_APOPTOTIC_PROCESS	GO_REGULATION_OF_B_CELL_APOPTOTIC_PROCESS		18	0.387539	1.09905	0.375969	0.470488	1	1509	tags=22%, list=8%, signal=24%
GO_CARBOHYDRATE_TRANSPORT	GO_CARBOHYDRATE_TRANSPORT		92	0.2694	1.09889	0.268537	0.470345	1	2566	tags=21%, list=14%, signal=24%
GO_VESICLE_COATING	GO_VESICLE_COATING		73	0.311653	1.09856	0.356736	0.470496	1	6883	tags=55%, list=37%, signal=86%
GO_OXIDOREDUCTASE_ACTIVITY_ACTING_ON_THE_CH_CH_GROUP_OF_DONORS_NAD_OR_NADP_AS_ACCEPTOR	GO_OXIDOREDUCTASE_ACTIVITY_ACTING_ON_THE_CH_CH_GROUP_OF_DONORS_NAD_OR_NADP_AS_ACCEPTOR		24	0.355659	1.09646	0.355828	0.473377	1	5592	tags=46%, list=30%, signal=65%
GO_MAGNESIUM_ION_TRANSMEMBRANE_TRANSPORT	GO_MAGNESIUM_ION_TRANSMEMBRANE_TRANSPORT		16	0.40402	1.09617	0.378543	0.473473	1	4144	tags=44%, list=22%, signal=56%
GO_NEGATIVE_REGULATION_OF_FATTY_ACID_METABOLIC_PROCESS	GO_NEGATIVE_REGULATION_OF_FATTY_ACID_METABOLIC_PROCESS		27	0.344736	1.09567	0.347305	0.473866	1	6089	tags=48%, list=33%, signal=71%
GO_ENDOPLASMIC_RETICULUM_ORGANIZATION	GO_ENDOPLASMIC_RETICULUM_ORGANIZATION		36	0.331639	1.09552	0.361377	0.47377	1	2683	tags=31%, list=14%, signal=36%
GO_GLYCOPROTEIN_CATABOLIC_PROCESS	GO_GLYCOPROTEIN_CATABOLIC_PROCESS		15	0.385633	1.09537	0.366255	0.473624	1	6418	tags=53%, list=34%, signal=81%
GO_POSITIVE_REGULATION_OF_PEPTIDASE_ACTIVITY	GO_POSITIVE_REGULATION_OF_PEPTIDASE_ACTIVITY		150	0.256749	1.09422	0.34739	0.475126	1	2740	tags=23%, list=15%, signal=27%
GO_CELLULAR_RESPONSE_TO_REACTIVE_OXYGEN_SPECIES	GO_CELLULAR_RESPONSE_TO_REACTIVE_OXYGEN_SPECIES		102	0.260567	1.0939	0.288344	0.475262	1	4265	tags=34%, list=23%, signal=44%
GO_MITOCHONDRIAL_GENOME_MAINTENANCE	GO_MITOCHONDRIAL_GENOME_MAINTENANCE		20	0.353392	1.09376	0.339357	0.475105	1	5985	tags=65%, list=32%, signal=95%
GO_PROTEIN_PALMITOYLATION	GO_PROTEIN_PALMITOYLATION		23	0.332658	1.09151	0.339921	0.478227	1	3388	tags=39%, list=18%, signal=48%
GO_TRANS_GOLGI_NETWORK_TRANSPORT_VESICLE	GO_TRANS_GOLGI_NETWORK_TRANSPORT_VESICLE		27	0.34432	1.09134	0.356031	0.478163	1	7318	tags=63%, list=39%, signal=103%
GO_GOLGI_STACK	GO_GOLGI_STACK		119	0.268198	1.09133	0.319312	0.477803	1	7342	tags=61%, list=39%, signal=99%
GO_EXTRINSIC_COMPONENT_OF_ORGANELLE_MEMBRANE	GO_EXTRINSIC_COMPONENT_OF_ORGANELLE_MEMBRANE		24	0.325233	1.09132	0.336538	0.477443	1	3812	tags=29%, list=20%, signal=37%
GO_NEGATIVE_REGULATION_OF_CYSTEINE_TYPE_ENDOPEPTIDASE_ACTIVITY	GO_NEGATIVE_REGULATION_OF_CYSTEINE_TYPE_ENDOPEPTIDASE_ACTIVITY		86	0.261972	1.08876	0.29899	0.481164	1	3826	tags=29%, list=20%, signal=36%
GO_VESICLE_CYTOSKELETAL_TRAFFICKING	GO_VESICLE_CYTOSKELETAL_TRAFFICKING		36	0.306761	1.08863	0.33002	0.480987	1	6649	tags=50%, list=36%, signal=77%
GO_NUCLEOSIDE_TRANSPORT	GO_NUCLEOSIDE_TRANSPORT		16	0.363534	1.08717	0.348606	0.482875	1	4806	tags=38%, list=26%, signal=50%
GO_MODULATION_BY_VIRUS_OF_HOST_MORPHOLOGY_OR_PHYSIOLOGY	GO_MODULATION_BY_VIRUS_OF_HOST_MORPHOLOGY_OR_PHYSIOLOGY		36	0.298141	1.08672	0.357955	0.48322	1	1826	tags=22%, list=10%, signal=25%
GO_REGULATION_OF_RESPONSE_TO_EXTRACELLULAR_STIMULUS	GO_REGULATION_OF_RESPONSE_TO_EXTRACELLULAR_STIMULUS		166	0.244337	1.0865	0.30916	0.483192	1	5514	tags=40%, list=29%, signal=56%
GO_POSITIVE_REGULATION_OF_CYCLIN_DEPENDENT_PROTEIN_KINASE_ACTIVITY	GO_POSITIVE_REGULATION_OF_CYCLIN_DEPENDENT_PROTEIN_KINASE_ACTIVITY		33	0.305281	1.08565	0.340164	0.484172	1	4137	tags=42%, list=22%, signal=54%
GO_NEGATIVE_REGULATION_OF_INTRINSIC_APOPTOTIC_SIGNALING_PATHWAY_IN_RESPONSE_TO_DNA_DAMAGE	GO_NEGATIVE_REGULATION_OF_INTRINSIC_APOPTOTIC_SIGNALING_PATHWAY_IN_RESPONSE_TO_DNA_DAMAGE		25	0.341933	1.08383	0.37182	0.486703	1	4439	tags=44%, list=24%, signal=58%
GO_UBIQUITIN_LIKE_PROTEIN_TRANSFERASE_ACTIVITY	GO_UBIQUITIN_LIKE_PROTEIN_TRANSFERASE_ACTIVITY		401	0.232071	1.08352	0.324853	0.486819	1	5065	tags=35%, list=27%, signal=47%
GO_POSITIVE_REGULATION_OF_WNT_SIGNALING_PATHWAY	GO_POSITIVE_REGULATION_OF_WNT_SIGNALING_PATHWAY		150	0.251003	1.08327	0.332645	0.486828	1	4098	tags=35%, list=22%, signal=44%
GO_DRUG_TRANSPORTER_ACTIVITY	GO_DRUG_TRANSPORTER_ACTIVITY		21	0.343139	1.08221	0.347059	0.488172	1	2141	tags=24%, list=11%, signal=27%
GO_PROTEIN_LOCALIZATION_TO_CENTROSOME	GO_PROTEIN_LOCALIZATION_TO_CENTROSOME		15	0.40385	1.08219	0.353057	0.48784	1	4718	tags=47%, list=25%, signal=62%
GO_INTRINSIC_APOPTOTIC_SIGNALING_PATHWAY_IN_RESPONSE_TO_DNA_DAMAGE	GO_INTRINSIC_APOPTOTIC_SIGNALING_PATHWAY_IN_RESPONSE_TO_DNA_DAMAGE		70	0.278751	1.08202	0.345309	0.487746	1	5268	tags=37%, list=28%, signal=52%
GO_RHO_GTPASE_BINDING	GO_RHO_GTPASE_BINDING		76	0.270427	1.08191	0.330813	0.487538	1	3873	tags=30%, list=21%, signal=38%
GO_PEPTIDYL_THREONINE_MODIFICATION	GO_PEPTIDYL_THREONINE_MODIFICATION		44	0.312861	1.08137	0.344689	0.488064	1	4819	tags=41%, list=26%, signal=55%
GO_CELLULAR_CARBOHYDRATE_METABOLIC_PROCESS	GO_CELLULAR_CARBOHYDRATE_METABOLIC_PROCESS		135	0.253902	1.08129	0.335968	0.48781	1	4309	tags=30%, list=23%, signal=39%
GO_GTP_RHO_BINDING	GO_GTP_RHO_BINDING		16	0.363953	1.08097	0.379447	0.487918	1	5512	tags=50%, list=29%, signal=71%
GO_TUBULIN_BINDING	GO_TUBULIN_BINDING		256	0.243149	1.08085	0.327968	0.487742	1	3699	tags=30%, list=20%, signal=37%
GO_HISTONE_DEUBIQUITINATION	GO_HISTONE_DEUBIQUITINATION		21	0.363314	1.08057	0.369863	0.487827	1	7020	tags=62%, list=38%, signal=99%
GO_XENOPHAGY	GO_XENOPHAGY		101	0.242964	1.08023	0.3	0.487967	1	4608	tags=39%, list=25%, signal=51%
GO_SIGNAL_TRANSDUCTION_IN_ABSENCE_OF_LIGAND	GO_SIGNAL_TRANSDUCTION_IN_ABSENCE_OF_LIGAND		33	0.296157	1.08002	0.353293	0.487947	1	3322	tags=24%, list=18%, signal=29%
GO_LOW_DENSITY_LIPOPROTEIN_PARTICLE_RECEPTOR_BINDING	GO_LOW_DENSITY_LIPOPROTEIN_PARTICLE_RECEPTOR_BINDING		17	0.397844	1.07998	0.365385	0.48764	1	5995	tags=41%, list=32%, signal=61%
GO_GOLGI_TO_ENDOSOME_TRANSPORT	GO_GOLGI_TO_ENDOSOME_TRANSPORT		17	0.392281	1.0799	0.387716	0.487393	1	6565	tags=53%, list=35%, signal=81%
GO_MALE_GAMETE_GENERATION	GO_MALE_GAMETE_GENERATION		414	0.23481	1.07987	0.338677	0.487071	1	3933	tags=23%, list=21%, signal=28%
GO_COA_HYDROLASE_ACTIVITY	GO_COA_HYDROLASE_ACTIVITY		20	0.364983	1.07984	0.36087	0.486741	1	7566	tags=55%, list=40%, signal=92%
GO_CELLULAR_RESPONSE_TO_TOXIC_SUBSTANCE	GO_CELLULAR_RESPONSE_TO_TOXIC_SUBSTANCE		24	0.330122	1.07955	0.332681	0.48685	1	4867	tags=33%, list=26%, signal=45%
GO_BETA_1_3_GALACTOSYLTRANSFERASE_ACTIVITY	GO_BETA_1_3_GALACTOSYLTRANSFERASE_ACTIVITY		15	0.385674	1.07915	0.367308	0.487136	1	6471	tags=47%, list=35%, signal=71%
GO_KINESIN_BINDING	GO_KINESIN_BINDING		30	0.331637	1.07904	0.349398	0.486942	1	4109	tags=30%, list=22%, signal=38%
GO_SPERMATID_DIFFERENTIATION	GO_SPERMATID_DIFFERENTIATION		109	0.256483	1.07819	0.327381	0.487936	1	4646	tags=33%, list=25%, signal=44%
GO_RESPONSE_TO_NITRIC_OXIDE	GO_RESPONSE_TO_NITRIC_OXIDE		21	0.342382	1.07758	0.362705	0.488579	1	934	tags=24%, list=5%, signal=25%
GO_POSITIVE_REGULATION_OF_INTRINSIC_APOPTOTIC_SIGNALING_PATHWAY	GO_POSITIVE_REGULATION_OF_INTRINSIC_APOPTOTIC_SIGNALING_PATHWAY		49	0.285367	1.07752	0.333333	0.488331	1	6722	tags=47%, list=36%, signal=73%
GO_OVARIAN_FOLLICLE_DEVELOPMENT	GO_OVARIAN_FOLLICLE_DEVELOPMENT		58	0.253739	1.07653	0.320329	0.489577	1	3881	tags=28%, list=21%, signal=35%
GO_ATPASE_COUPLED_ION_TRANSMEMBRANE_TRANSPORTER_ACTIVITY	GO_ATPASE_COUPLED_ION_TRANSMEMBRANE_TRANSPORTER_ACTIVITY		71	0.284426	1.07589	0.343396	0.490228	1	5439	tags=38%, list=29%, signal=53%
GO_VESICLE_COAT	GO_VESICLE_COAT		44	0.325583	1.07548	0.375479	0.49051	1	6565	tags=59%, list=35%, signal=91%
GO_DEMETHYLASE_ACTIVITY	GO_DEMETHYLASE_ACTIVITY		31	0.336528	1.07424	0.354776	0.492179	1	6858	tags=48%, list=37%, signal=76%
GO_PIGMENT_GRANULE	GO_PIGMENT_GRANULE		101	0.284002	1.07406	0.360396	0.492096	1	5666	tags=47%, list=30%, signal=66%
GO_IRON_ION_TRANSPORT	GO_IRON_ION_TRANSPORT		53	0.296522	1.07355	0.368522	0.492521	1	2264	tags=21%, list=12%, signal=24%
GO_NEGATIVE_REGULATION_OF_PROTEIN_TYROSINE_KINASE_ACTIVITY	GO_NEGATIVE_REGULATION_OF_PROTEIN_TYROSINE_KINASE_ACTIVITY		19	0.347192	1.07211	0.370166	0.494453	1	3970	tags=47%, list=21%, signal=60%
GO_URONIC_ACID_METABOLIC_PROCESS	GO_URONIC_ACID_METABOLIC_PROCESS		27	0.371965	1.072	0.392197	0.494243	1	6089	tags=37%, list=33%, signal=55%
GO_MICROTUBULE_ANCHORING	GO_MICROTUBULE_ANCHORING		17	0.395091	1.07171	0.390342	0.494312	1	3551	tags=41%, list=19%, signal=51%
GO_REGULATION_OF_DNA_TEMPLATED_TRANSCRIPTION_IN_RESPONSE_TO_STRESS	GO_REGULATION_OF_DNA_TEMPLATED_TRANSCRIPTION_IN_RESPONSE_TO_STRESS		63	0.27262	1.07169	0.363462	0.49397	1	6678	tags=40%, list=36%, signal=62%
GO_GERM_CELL_DEVELOPMENT	GO_GERM_CELL_DEVELOPMENT		185	0.24158	1.0711	0.329243	0.494516	1	4646	tags=29%, list=25%, signal=38%
GO_CELLULAR_RESPONSE_TO_OXIDATIVE_STRESS	GO_CELLULAR_RESPONSE_TO_OXIDATIVE_STRESS		179	0.234002	1.06993	0.320329	0.496015	1	4130	tags=30%, list=22%, signal=38%
GO_LIPID_PARTICLE	GO_LIPID_PARTICLE		60	0.289223	1.06969	0.345924	0.496049	1	3729	tags=32%, list=20%, signal=39%
GO_PCG_PROTEIN_COMPLEX	GO_PCG_PROTEIN_COMPLEX		43	0.324733	1.06851	0.362745	0.497596	1	4062	tags=40%, list=22%, signal=50%
GO_RESPONSE_TO_OXYGEN_RADICAL	GO_RESPONSE_TO_OXYGEN_RADICAL		18	0.352191	1.06792	0.385927	0.498168	1	3715	tags=39%, list=20%, signal=48%
GO_RETROMER_COMPLEX	GO_RETROMER_COMPLEX		20	0.351021	1.06715	0.365759	0.499067	1	2444	tags=30%, list=13%, signal=34%
GO_SNARE_COMPLEX	GO_SNARE_COMPLEX		52	0.301168	1.0661	0.375231	0.500374	1	6972	tags=50%, list=37%, signal=79%
GO_PHOSPHATIDYLETHANOLAMINE_METABOLIC_PROCESS	GO_PHOSPHATIDYLETHANOLAMINE_METABOLIC_PROCESS		16	0.373486	1.06543	0.368	0.501124	1	7283	tags=50%, list=39%, signal=82%
GO_ENTRAINMENT_OF_CIRCADIAN_CLOCK	GO_ENTRAINMENT_OF_CIRCADIAN_CLOCK		25	0.327317	1.0646	0.381323	0.502103	1	5268	tags=40%, list=28%, signal=56%
GO_ERYTHROCYTE_HOMEOSTASIS	GO_ERYTHROCYTE_HOMEOSTASIS		69	0.252147	1.06181	0.346228	0.50626	1	2789	tags=25%, list=15%, signal=29%
GO_MODULATION_BY_SYMBIONT_OF_HOST_CELLULAR_PROCESS	GO_MODULATION_BY_SYMBIONT_OF_HOST_CELLULAR_PROCESS		27	0.3174	1.06143	0.375246	0.506453	1	1826	tags=26%, list=10%, signal=29%
GO_ORGAN_REGENERATION	GO_ORGAN_REGENERATION		82	0.268646	1.06103	0.35119	0.506744	1	1406	tags=17%, list=8%, signal=18%
GO_BETA_TUBULIN_BINDING	GO_BETA_TUBULIN_BINDING		35	0.305512	1.06036	0.368421	0.507483	1	5701	tags=46%, list=30%, signal=66%
GO_PHOSPHATIDYLCHOLINE_BIOSYNTHETIC_PROCESS	GO_PHOSPHATIDYLCHOLINE_BIOSYNTHETIC_PROCESS		26	0.327564	1.05893	0.376953	0.509405	1	5180	tags=42%, list=28%, signal=58%
GO_GOLGI_CISTERNA	GO_GOLGI_CISTERNA		89	0.264512	1.05869	0.362949	0.509431	1	7342	tags=61%, list=39%, signal=99%
GO_PROTEIN_SERINE_THREONINE_KINASE_ACTIVITY	GO_PROTEIN_SERINE_THREONINE_KINASE_ACTIVITY		427	0.226718	1.0586	0.371257	0.509196	1	5371	tags=36%, list=29%, signal=50%
GO_RNA_POLYMERASE_II_DISTAL_ENHANCER_SEQUENCE_SPECIFIC_DNA_BINDING	GO_RNA_POLYMERASE_II_DISTAL_ENHANCER_SEQUENCE_SPECIFIC_DNA_BINDING		63	0.284216	1.058	0.357422	0.509753	1	5425	tags=38%, list=29%, signal=53%
GO_ORGANIC_ACID_BIOSYNTHETIC_PROCESS	GO_ORGANIC_ACID_BIOSYNTHETIC_PROCESS		251	0.232637	1.0574	0.347826	0.510356	1	4519	tags=31%, list=24%, signal=40%
GO_REGULATION_OF_FATTY_ACID_BIOSYNTHETIC_PROCESS	GO_REGULATION_OF_FATTY_ACID_BIOSYNTHETIC_PROCESS		35	0.319097	1.05694	0.391389	0.510728	1	5471	tags=40%, list=29%, signal=56%
GO_NEGATIVE_REGULATION_OF_CYCLIN_DEPENDENT_PROTEIN_KINASE_ACTIVITY	GO_NEGATIVE_REGULATION_OF_CYCLIN_DEPENDENT_PROTEIN_KINASE_ACTIVITY		32	0.28679	1.05666	0.379242	0.510806	1	2780	tags=25%, list=15%, signal=29%
GO_ER_TO_GOLGI_TRANSPORT_VESICLE_MEMBRANE	GO_ER_TO_GOLGI_TRANSPORT_VESICLE_MEMBRANE		51	0.337059	1.05638	0.413926	0.510881	1	7202	tags=53%, list=38%, signal=86%
GO_NEGATIVE_REGULATION_OF_DNA_RECOMBINATION	GO_NEGATIVE_REGULATION_OF_DNA_RECOMBINATION		15	0.400927	1.0562	0.404762	0.510823	1	5776	tags=47%, list=31%, signal=67%
GO_PROTEIN_K48_LINKED_DEUBIQUITINATION	GO_PROTEIN_K48_LINKED_DEUBIQUITINATION		20	0.367915	1.05561	0.412121	0.511359	1	5542	tags=55%, list=30%, signal=78%
GO_TRANSITION_METAL_ION_TRANSPORT	GO_TRANSITION_METAL_ION_TRANSPORT		104	0.254463	1.05451	0.369811	0.512814	1	5439	tags=35%, list=29%, signal=49%
GO_BLOC_COMPLEX	GO_BLOC_COMPLEX		15	0.391779	1.05431	0.400778	0.512782	1	8043	tags=60%, list=43%, signal=105%
GO_ANTIGEN_RECEPTOR_MEDIATED_SIGNALING_PATHWAY	GO_ANTIGEN_RECEPTOR_MEDIATED_SIGNALING_PATHWAY		169	0.314883	1.05418	0.431138	0.512612	1	5062	tags=40%, list=27%, signal=55%
GO_ECTODERMAL_PLACODE_DEVELOPMENT	GO_ECTODERMAL_PLACODE_DEVELOPMENT		15	0.385561	1.05374	0.383838	0.512913	1	6442	tags=60%, list=34%, signal=91%
GO_PROTEIN_PHOSPHATASE_TYPE_2A_COMPLEX	GO_PROTEIN_PHOSPHATASE_TYPE_2A_COMPLEX		19	0.361556	1.05172	0.396484	0.515781	1	6929	tags=68%, list=37%, signal=109%
GO_REGULATION_OF_MITOCHONDRIAL_MEMBRANE_PERMEABILITY_INVOLVED_IN_APOPTOTIC_PROCESS	GO_REGULATION_OF_MITOCHONDRIAL_MEMBRANE_PERMEABILITY_INVOLVED_IN_APOPTOTIC_PROCESS		22	0.332301	1.05151	0.401674	0.515751	1	6618	tags=50%, list=35%, signal=77%
GO_OOCYTE_MATURATION	GO_OOCYTE_MATURATION		17	0.360135	1.05051	0.395876	0.51702	1	3762	tags=35%, list=20%, signal=44%
GO_ENHANCER_BINDING	GO_ENHANCER_BINDING		90	0.263906	1.04923	0.36811	0.518727	1	4456	tags=30%, list=24%, signal=39%
GO_ORGANELLE_SUBCOMPARTMENT	GO_ORGANELLE_SUBCOMPARTMENT		293	0.236532	1.04847	0.364151	0.519575	1	4669	tags=33%, list=25%, signal=44%
GO_REGULATION_OF_PROTEIN_ACETYLATION	GO_REGULATION_OF_PROTEIN_ACETYLATION		62	0.261456	1.04761	0.375969	0.520579	1	3309	tags=29%, list=18%, signal=35%
GO_POSITIVE_REGULATION_OF_CELL_CYCLE_G1_S_PHASE_TRANSITION	GO_POSITIVE_REGULATION_OF_CELL_CYCLE_G1_S_PHASE_TRANSITION		28	0.313277	1.0475	0.36811	0.520368	1	3060	tags=29%, list=16%, signal=34%
GO_CELLULAR_MODIFIED_AMINO_ACID_CATABOLIC_PROCESS	GO_CELLULAR_MODIFIED_AMINO_ACID_CATABOLIC_PROCESS		16	0.37342	1.04745	0.420202	0.520063	1	7372	tags=63%, list=39%, signal=103%
GO_POSITIVE_REGULATION_OF_ACTIN_FILAMENT_POLYMERIZATION	GO_POSITIVE_REGULATION_OF_ACTIN_FILAMENT_POLYMERIZATION		62	0.276316	1.04714	0.390291	0.520208	1	5988	tags=48%, list=32%, signal=71%
GO_PHOSPHATASE_INHIBITOR_ACTIVITY	GO_PHOSPHATASE_INHIBITOR_ACTIVITY		34	0.301712	1.04636	0.38856	0.521083	1	4862	tags=38%, list=26%, signal=52%
GO_PROTEIN_LOCALIZATION_TO_LYSOSOME	GO_PROTEIN_LOCALIZATION_TO_LYSOSOME		17	0.357297	1.0458	0.377395	0.5216	1	6731	tags=59%, list=36%, signal=92%
GO_CELLULAR_RESPONSE_TO_HYDROGEN_PEROXIDE	GO_CELLULAR_RESPONSE_TO_HYDROGEN_PEROXIDE		60	0.275202	1.04548	0.371257	0.521727	1	4265	tags=32%, list=23%, signal=41%
GO_REGULATION_OF_CELL_AGING	GO_REGULATION_OF_CELL_AGING		32	0.305614	1.04351	0.390852	0.524553	1	3759	tags=34%, list=20%, signal=43%
GO_NEGATIVE_REGULATION_OF_TYPE_I_INTERFERON_PRODUCTION	GO_NEGATIVE_REGULATION_OF_TYPE_I_INTERFERON_PRODUCTION		38	0.324238	1.0416	0.409449	0.527351	1	5815	tags=42%, list=31%, signal=61%
GO_REGULATION_OF_ESTABLISHMENT_OF_PLANAR_POLARITY	GO_REGULATION_OF_ESTABLISHMENT_OF_PLANAR_POLARITY		110	0.270637	1.03985	0.409639	0.529825	1	3697	tags=38%, list=20%, signal=47%
GO_AUTOPHAGY	GO_AUTOPHAGY		366	0.214338	1.0397	0.359127	0.529702	1	6678	tags=47%, list=36%, signal=72%
GO_AGGRESOME	GO_AGGRESOME		31	0.286175	1.0374	0.419231	0.533102	1	5497	tags=48%, list=29%, signal=68%
GO_PHOSPHATASE_COMPLEX	GO_PHOSPHATASE_COMPLEX		43	0.297037	1.03621	0.41556	0.534679	1	5417	tags=44%, list=29%, signal=62%
GO_REGULATION_OF_VIRAL_GENOME_REPLICATION	GO_REGULATION_OF_VIRAL_GENOME_REPLICATION		70	0.288337	1.03459	0.406439	0.537007	1	2627	tags=21%, list=14%, signal=25%
GO_CXCR_CHEMOKINE_RECEPTOR_BINDING	GO_CXCR_CHEMOKINE_RECEPTOR_BINDING		15	0.401376	1.03418	0.421158	0.537295	1	5068	tags=40%, list=27%, signal=55%
GO_MICROTUBULE_PLUS_END	GO_MICROTUBULE_PLUS_END		16	0.391316	1.03409	0.415842	0.537043	1	957	tags=25%, list=5%, signal=26%
GO_PEPTIDYL_PROLINE_MODIFICATION	GO_PEPTIDYL_PROLINE_MODIFICATION		51	0.292692	1.03394	0.412955	0.536903	1	7208	tags=55%, list=39%, signal=89%
GO_POSITIVE_REGULATION_OF_PROTEIN_POLYMERIZATION	GO_POSITIVE_REGULATION_OF_PROTEIN_POLYMERIZATION		82	0.250722	1.03388	0.383268	0.536615	1	4864	tags=37%, list=26%, signal=49%
GO_ORGANIC_HYDROXY_COMPOUND_BIOSYNTHETIC_PROCESS	GO_ORGANIC_HYDROXY_COMPOUND_BIOSYNTHETIC_PROCESS		172	0.229978	1.03227	0.387033	0.538985	1	5826	tags=37%, list=31%, signal=54%
GO_REGULATION_OF_MITOCHONDRIAL_MEMBRANE_POTENTIAL	GO_REGULATION_OF_MITOCHONDRIAL_MEMBRANE_POTENTIAL		52	0.27764	1.03171	0.414938	0.53948	1	2762	tags=33%, list=15%, signal=38%
GO_PROTEIN_KINASE_A_CATALYTIC_SUBUNIT_BINDING	GO_PROTEIN_KINASE_A_CATALYTIC_SUBUNIT_BINDING		15	0.351071	1.03166	0.415385	0.539168	1	3832	tags=53%, list=20%, signal=67%
GO_CENTROSOME_LOCALIZATION	GO_CENTROSOME_LOCALIZATION		17	0.3559	1.02924	0.442886	0.542787	1	2473	tags=24%, list=13%, signal=27%
GO_BRANCHED_CHAIN_AMINO_ACID_METABOLIC_PROCESS	GO_BRANCHED_CHAIN_AMINO_ACID_METABOLIC_PROCESS		23	0.35564	1.02836	0.448485	0.543879	1	4281	tags=48%, list=23%, signal=62%
GO_REGULATION_OF_TYPE_I_INTERFERON_MEDIATED_SIGNALING_PATHWAY	GO_REGULATION_OF_TYPE_I_INTERFERON_MEDIATED_SIGNALING_PATHWAY		26	0.331041	1.02811	0.418327	0.543899	1	6779	tags=54%, list=36%, signal=84%
GO_TRANS_GOLGI_NETWORK	GO_TRANS_GOLGI_NETWORK		180	0.240558	1.02656	0.39619	0.54613	1	4755	tags=34%, list=25%, signal=46%
GO_MONOCARBOXYLIC_ACID_METABOLIC_PROCESS	GO_MONOCARBOXYLIC_ACID_METABOLIC_PROCESS		480	0.221165	1.02581	0.38	0.546965	1	4829	tags=30%, list=26%, signal=40%
GO_MICROVILLUS_ORGANIZATION	GO_MICROVILLUS_ORGANIZATION		19	0.345755	1.02561	0.438632	0.546912	1	3327	tags=32%, list=18%, signal=38%
GO_PHOSPHATIDYLGLYCEROL_ACYL_CHAIN_REMODELING	GO_PHOSPHATIDYLGLYCEROL_ACYL_CHAIN_REMODELING		17	0.356352	1.02542	0.411765	0.546818	1	6920	tags=47%, list=37%, signal=75%
GO_DNA_METHYLATION_INVOLVED_IN_GAMETE_GENERATION	GO_DNA_METHYLATION_INVOLVED_IN_GAMETE_GENERATION		18	0.366661	1.02477	0.436326	0.547477	1	2100	tags=17%, list=11%, signal=19%
GO_RETROGRADE_TRANSPORT_VESICLE_RECYCLING_WITHIN_GOLGI	GO_RETROGRADE_TRANSPORT_VESICLE_RECYCLING_WITHIN_GOLGI		24	0.344445	1.02313	0.43295	0.549816	1	5450	tags=38%, list=29%, signal=53%
GO_POSITIVE_REGULATION_OF_PROTEIN_EXPORT_FROM_NUCLEUS	GO_POSITIVE_REGULATION_OF_PROTEIN_EXPORT_FROM_NUCLEUS		19	0.328787	1.02282	0.438795	0.54996	1	5268	tags=42%, list=28%, signal=59%
GO_REGULATION_OF_DEFENSE_RESPONSE_TO_VIRUS	GO_REGULATION_OF_DEFENSE_RESPONSE_TO_VIRUS		184	0.221879	1.02162	0.406504	0.55158	1	4608	tags=33%, list=25%, signal=43%
GO_VESICLE_DOCKING_INVOLVED_IN_EXOCYTOSIS	GO_VESICLE_DOCKING_INVOLVED_IN_EXOCYTOSIS		34	0.297638	1.02094	0.408922	0.552299	1	6081	tags=41%, list=33%, signal=61%
GO_NEGATIVE_REGULATION_OF_BINDING	GO_NEGATIVE_REGULATION_OF_BINDING		129	0.223701	1.01963	0.412826	0.554076	1	5371	tags=39%, list=29%, signal=54%
GO_PHOSPHOLIPID_METABOLIC_PROCESS	GO_PHOSPHOLIPID_METABOLIC_PROCESS		341	0.205874	1.01923	0.413127	0.554339	1	4755	tags=28%, list=25%, signal=37%
GO_ACTIVATION_OF_INNATE_IMMUNE_RESPONSE	GO_ACTIVATION_OF_INNATE_IMMUNE_RESPONSE		202	0.268342	1.01849	0.44	0.555205	1	5591	tags=41%, list=30%, signal=57%
GO_POST_GOLGI_VESICLE_MEDIATED_TRANSPORT	GO_POST_GOLGI_VESICLE_MEDIATED_TRANSPORT		81	0.270897	1.01813	0.427746	0.555417	1	6283	tags=46%, list=34%, signal=68%
GO_NON_CANONICAL_WNT_SIGNALING_PATHWAY	GO_NON_CANONICAL_WNT_SIGNALING_PATHWAY		135	0.243317	1.01712	0.426615	0.556711	1	3697	tags=34%, list=20%, signal=42%
GO_POSITIVE_REGULATION_OF_PROTEIN_LOCALIZATION_TO_CELL_PERIPHERY	GO_POSITIVE_REGULATION_OF_PROTEIN_LOCALIZATION_TO_CELL_PERIPHERY		35	0.288098	1.01591	0.414634	0.558305	1	4764	tags=46%, list=25%, signal=61%
GO_BRANCHING_INVOLVED_IN_MAMMARY_GLAND_DUCT_MORPHOGENESIS	GO_BRANCHING_INVOLVED_IN_MAMMARY_GLAND_DUCT_MORPHOGENESIS		20	0.332832	1.0154	0.449902	0.558797	1	4381	tags=40%, list=23%, signal=52%
GO_SNAP_RECEPTOR_ACTIVITY	GO_SNAP_RECEPTOR_ACTIVITY		38	0.293869	1.01533	0.416206	0.558526	1	6972	tags=55%, list=37%, signal=88%
GO_VERY_LONG_CHAIN_FATTY_ACID_METABOLIC_PROCESS	GO_VERY_LONG_CHAIN_FATTY_ACID_METABOLIC_PROCESS		25	0.327688	1.01499	0.430862	0.558678	1	4080	tags=40%, list=22%, signal=51%
GO_LABYRINTHINE_LAYER_BLOOD_VESSEL_DEVELOPMENT	GO_LABYRINTHINE_LAYER_BLOOD_VESSEL_DEVELOPMENT		18	0.340388	1.01498	0.437113	0.558308	1	3923	tags=33%, list=21%, signal=42%
GO_POSITIVE_REGULATION_OF_G1_S_TRANSITION_OF_MITOTIC_CELL_CYCLE	GO_POSITIVE_REGULATION_OF_G1_S_TRANSITION_OF_MITOTIC_CELL_CYCLE		24	0.309401	1.01386	0.423301	0.559826	1	3060	tags=29%, list=16%, signal=35%
GO_MICROTUBULE_END	GO_MICROTUBULE_END		21	0.356783	1.01342	0.440404	0.560176	1	957	tags=24%, list=5%, signal=25%
GO_NEGATIVE_REGULATION_OF_VIRAL_ENTRY_INTO_HOST_CELL	GO_NEGATIVE_REGULATION_OF_VIRAL_ENTRY_INTO_HOST_CELL		17	0.353975	1.01246	0.445312	0.561444	1	926	tags=24%, list=5%, signal=25%
GO_REGULATION_OF_MULTI_ORGANISM_PROCESS	GO_REGULATION_OF_MULTI_ORGANISM_PROCESS		442	0.213563	1.01208	0.443775	0.561662	1	4520	tags=30%, list=24%, signal=38%
GO_REGULATION_OF_RECEPTOR_RECYCLING	GO_REGULATION_OF_RECEPTOR_RECYCLING		19	0.325833	1.01197	0.422037	0.561479	1	4073	tags=42%, list=22%, signal=54%
GO_EPHRIN_RECEPTOR_SIGNALING_PATHWAY	GO_EPHRIN_RECEPTOR_SIGNALING_PATHWAY		84	0.247811	1.01109	0.420523	0.562557	1	6287	tags=50%, list=34%, signal=75%
GO_PROTEIN_OLIGOMERIZATION	GO_PROTEIN_OLIGOMERIZATION		420	0.196925	1.00966	0.407332	0.564564	1	5429	tags=34%, list=29%, signal=47%
GO_ER_TO_GOLGI_TRANSPORT_VESICLE	GO_ER_TO_GOLGI_TRANSPORT_VESICLE		67	0.299714	1.00949	0.440313	0.56446	1	7202	tags=49%, list=38%, signal=80%
GO_PROTEIN_K63_LINKED_DEUBIQUITINATION	GO_PROTEIN_K63_LINKED_DEUBIQUITINATION		23	0.314185	1.0085	0.439771	0.565753	1	4662	tags=39%, list=25%, signal=52%
GO_GOLGI_CISTERNA_MEMBRANE	GO_GOLGI_CISTERNA_MEMBRANE		71	0.259011	1.00725	0.412758	0.567422	1	7342	tags=58%, list=39%, signal=95%
GO_SYNAPTONEMAL_COMPLEX_ORGANIZATION	GO_SYNAPTONEMAL_COMPLEX_ORGANIZATION		20	0.337477	1.00645	0.438735	0.568386	1	4142	tags=25%, list=22%, signal=32%
GO_DORSAL_VENTRAL_AXIS_SPECIFICATION	GO_DORSAL_VENTRAL_AXIS_SPECIFICATION		20	0.325748	1.00621	0.462	0.568406	1	6589	tags=60%, list=35%, signal=93%
GO_INCLUSION_BODY	GO_INCLUSION_BODY		66	0.247782	1.00572	0.47093	0.568844	1	5500	tags=45%, list=29%, signal=64%
GO_NEURAL_TUBE_FORMATION	GO_NEURAL_TUBE_FORMATION		94	0.243472	1.00414	0.461538	0.571146	1	2063	tags=20%, list=11%, signal=23%
GO_PHOSPHORIC_ESTER_HYDROLASE_ACTIVITY	GO_PHOSPHORIC_ESTER_HYDROLASE_ACTIVITY		344	0.197725	1.00403	0.455796	0.570945	1	5111	tags=31%, list=27%, signal=41%
GO_MICROTUBULE_POLYMERIZATION	GO_MICROTUBULE_POLYMERIZATION		26	0.324138	1.00353	0.444008	0.571372	1	3610	tags=35%, list=19%, signal=43%
GO_MYELOID_CELL_HOMEOSTASIS	GO_MYELOID_CELL_HOMEOSTASIS		84	0.239175	1.00334	0.473161	0.571283	1	2789	tags=24%, list=15%, signal=28%
GO_S_ADENOSYLMETHIONINE_METABOLIC_PROCESS	GO_S_ADENOSYLMETHIONINE_METABOLIC_PROCESS		18	0.349077	1.00281	0.449416	0.57179	1	6154	tags=61%, list=33%, signal=91%
GO_MHC_CLASS_II_PROTEIN_COMPLEX_BINDING	GO_MHC_CLASS_II_PROTEIN_COMPLEX_BINDING		15	0.437003	1.00173	0.488934	0.573185	1	5035	tags=40%, list=27%, signal=55%
GO_ESTABLISHMENT_OF_PROTEIN_LOCALIZATION_TO_GOLGI	GO_ESTABLISHMENT_OF_PROTEIN_LOCALIZATION_TO_GOLGI		20	0.349918	1.00114	0.446602	0.57382	1	3876	tags=30%, list=21%, signal=38%
GO_INTRACELLULAR_RECEPTOR_SIGNALING_PATHWAY	GO_INTRACELLULAR_RECEPTOR_SIGNALING_PATHWAY		161	0.228447	0.999704	0.44358	0.575814	1	5088	tags=35%, list=27%, signal=48%
GO_PHOSPHATIDYLCHOLINE_ACYL_CHAIN_REMODELING	GO_PHOSPHATIDYLCHOLINE_ACYL_CHAIN_REMODELING		26	0.304192	0.9989	0.428295	0.576767	1	6920	tags=46%, list=37%, signal=73%
GO_HISTONE_DEMETHYLASE_ACTIVITY	GO_HISTONE_DEMETHYLASE_ACTIVITY		23	0.350624	0.998295	0.483622	0.577391	1	6858	tags=48%, list=37%, signal=75%
GO_TRIVALENT_INORGANIC_CATION_TRANSPORT	GO_TRIVALENT_INORGANIC_CATION_TRANSPORT		39	0.293489	0.998129	0.438202	0.577265	1	7881	tags=56%, list=42%, signal=97%
GO_MICROFILAMENT_MOTOR_ACTIVITY	GO_MICROFILAMENT_MOTOR_ACTIVITY		21	0.327999	0.994341	0.448413	0.583365	1	1341	tags=19%, list=7%, signal=20%
GO_COPI_COATED_VESICLE	GO_COPI_COATED_VESICLE		22	0.352663	0.994332	0.463551	0.58297	1	6754	tags=73%, list=36%, signal=114%
GO_MACROAUTOPHAGY	GO_MACROAUTOPHAGY		260	0.203629	0.993646	0.434783	0.583726	1	6468	tags=46%, list=35%, signal=70%
GO_GLYCOSYLATION	GO_GLYCOSYLATION		247	0.229146	0.991503	0.462302	0.586949	1	4544	tags=32%, list=24%, signal=42%
GO_ALCOHOL_METABOLIC_PROCESS	GO_ALCOHOL_METABOLIC_PROCESS		341	0.212379	0.991357	0.448077	0.58679	1	6133	tags=36%, list=33%, signal=53%
GO_DNA_DEALKYLATION	GO_DNA_DEALKYLATION		20	0.324435	0.989698	0.491018	0.589307	1	6980	tags=55%, list=37%, signal=88%
GO_ACETYLGLUCOSAMINYLTRANSFERASE_ACTIVITY	GO_ACETYLGLUCOSAMINYLTRANSFERASE_ACTIVITY		44	0.271902	0.989438	0.426667	0.589325	1	6657	tags=39%, list=36%, signal=60%
GO_REGULATION_OF_STEM_CELL_POPULATION_MAINTENANCE	GO_REGULATION_OF_STEM_CELL_POPULATION_MAINTENANCE		17	0.333825	0.988817	0.464491	0.590005	1	5361	tags=47%, list=29%, signal=66%
GO_MACROMITOPHAGY	GO_MACROMITOPHAGY		128	0.209085	0.986892	0.465116	0.59289	1	4608	tags=34%, list=25%, signal=44%
GO_REGULATION_OF_ERBB_SIGNALING_PATHWAY	GO_REGULATION_OF_ERBB_SIGNALING_PATHWAY		79	0.250268	0.985645	0.455577	0.594595	1	6678	tags=43%, list=36%, signal=67%
GO_CLUSTER_OF_ACTIN_BASED_CELL_PROJECTIONS	GO_CLUSTER_OF_ACTIN_BASED_CELL_PROJECTIONS		134	0.237251	0.985354	0.456863	0.594673	1	4971	tags=30%, list=27%, signal=40%
GO_MYD88_INDEPENDENT_TOLL_LIKE_RECEPTOR_SIGNALING_PATHWAY	GO_MYD88_INDEPENDENT_TOLL_LIKE_RECEPTOR_SIGNALING_PATHWAY		30	0.31952	0.984409	0.464789	0.595918	1	6724	tags=57%, list=36%, signal=88%
GO_LUMENAL_SIDE_OF_MEMBRANE	GO_LUMENAL_SIDE_OF_MEMBRANE		29	0.371576	0.983863	0.490157	0.596451	1	5035	tags=41%, list=27%, signal=57%
GO_DIGESTIVE_SYSTEM_PROCESS	GO_DIGESTIVE_SYSTEM_PROCESS		60	0.278573	0.982514	0.4714	0.598373	1	3788	tags=23%, list=20%, signal=29%
GO_CELLULAR_RESPONSE_TO_EPIDERMAL_GROWTH_FACTOR_STIMULUS	GO_CELLULAR_RESPONSE_TO_EPIDERMAL_GROWTH_FACTOR_STIMULUS		23	0.311999	0.981891	0.463074	0.599012	1	4764	tags=39%, list=25%, signal=52%
GO_PHOSPHATIDYLSERINE_METABOLIC_PROCESS	GO_PHOSPHATIDYLSERINE_METABOLIC_PROCESS		28	0.302633	0.981033	0.472222	0.600057	1	6920	tags=46%, list=37%, signal=74%
GO_MITOGEN_ACTIVATED_PROTEIN_KINASE_BINDING	GO_MITOGEN_ACTIVATED_PROTEIN_KINASE_BINDING		24	0.318146	0.977894	0.493097	0.605202	1	4742	tags=42%, list=25%, signal=56%
GO_CARBOHYDRATE_BIOSYNTHETIC_PROCESS	GO_CARBOHYDRATE_BIOSYNTHETIC_PROCESS		118	0.249431	0.977741	0.473141	0.60505	1	5387	tags=38%, list=29%, signal=53%
GO_CULLIN_RING_UBIQUITIN_LIGASE_COMPLEX	GO_CULLIN_RING_UBIQUITIN_LIGASE_COMPLEX		141	0.228728	0.977593	0.466797	0.604895	1	5289	tags=37%, list=28%, signal=51%
GO_CELLULAR_RESPONSE_TO_ESTRADIOL_STIMULUS	GO_CELLULAR_RESPONSE_TO_ESTRADIOL_STIMULUS		29	0.283093	0.976702	0.480159	0.606007	1	927	tags=17%, list=5%, signal=18%
GO_REGULATION_OF_DEFENSE_RESPONSE_TO_VIRUS_BY_HOST	GO_REGULATION_OF_DEFENSE_RESPONSE_TO_VIRUS_BY_HOST		130	0.21024	0.976088	0.493952	0.606634	1	4608	tags=33%, list=25%, signal=44%
GO_PROTEIN_COMPLEX_SCAFFOLD	GO_PROTEIN_COMPLEX_SCAFFOLD		64	0.241507	0.975466	0.485605	0.607316	1	4998	tags=38%, list=27%, signal=51%
GO_RHYTHMIC_BEHAVIOR	GO_RHYTHMIC_BEHAVIOR		18	0.313597	0.974877	0.488806	0.607958	1	5268	tags=33%, list=28%, signal=46%
GO_RECYCLING_ENDOSOME_MEMBRANE	GO_RECYCLING_ENDOSOME_MEMBRANE		38	0.278907	0.973769	0.466281	0.60949	1	5009	tags=39%, list=27%, signal=54%
GO_EMBRYONIC_AXIS_SPECIFICATION	GO_EMBRYONIC_AXIS_SPECIFICATION		33	0.283085	0.97365	0.469854	0.609281	1	6799	tags=48%, list=36%, signal=76%
GO_INTRAMOLECULAR_OXIDOREDUCTASE_ACTIVITY_TRANSPOSING_S_S_BONDS	GO_INTRAMOLECULAR_OXIDOREDUCTASE_ACTIVITY_TRANSPOSING_S_S_BONDS		20	0.356564	0.973431	0.476923	0.609248	1	5914	tags=55%, list=32%, signal=80%
GO_REGULATION_OF_ANOIKIS	GO_REGULATION_OF_ANOIKIS		24	0.307773	0.97297	0.483871	0.609629	1	4429	tags=42%, list=24%, signal=55%
GO_REGULATION_OF_DNA_BINDING	GO_REGULATION_OF_DNA_BINDING		92	0.221914	0.972163	0.485323	0.610665	1	5608	tags=39%, list=30%, signal=56%
GO_CELL_FATE_COMMITMENT_INVOLVED_IN_FORMATION_OF_PRIMARY_GERM_LAYER	GO_CELL_FATE_COMMITMENT_INVOLVED_IN_FORMATION_OF_PRIMARY_GERM_LAYER		28	0.275792	0.967441	0.484277	0.618632	1	6836	tags=46%, list=37%, signal=73%
GO_POLE_PLASM	GO_POLE_PLASM		15	0.355646	0.965116	0.495951	0.622257	1	6245	tags=40%, list=33%, signal=60%
GO_SINGLE_FERTILIZATION	GO_SINGLE_FERTILIZATION		103	0.24495	0.964912	0.471545	0.622183	1	5360	tags=29%, list=29%, signal=41%
GO_PHOSPHATE_ION_TRANSPORT	GO_PHOSPHATE_ION_TRANSPORT		18	0.320986	0.963404	0.488593	0.624476	1	4041	tags=33%, list=22%, signal=42%
GO_AMINO_ACID_BINDING	GO_AMINO_ACID_BINDING		104	0.221126	0.962084	0.526	0.626376	1	2275	tags=17%, list=12%, signal=20%
GO_REGULATION_OF_EXECUTION_PHASE_OF_APOPTOSIS	GO_REGULATION_OF_EXECUTION_PHASE_OF_APOPTOSIS		24	0.299346	0.962054	0.502058	0.625987	1	2840	tags=33%, list=15%, signal=39%
GO_REGULATION_OF_ATPASE_ACTIVITY	GO_REGULATION_OF_ATPASE_ACTIVITY		61	0.243192	0.960816	0.528846	0.627818	1	2206	tags=21%, list=12%, signal=24%
GO_COFACTOR_TRANSPORTER_ACTIVITY	GO_COFACTOR_TRANSPORTER_ACTIVITY		21	0.313288	0.960748	0.486188	0.627504	1	4776	tags=38%, list=26%, signal=51%
GO_PROTEIN_MATURATION	GO_PROTEIN_MATURATION		252	0.211464	0.960245	0.510891	0.627996	1	5815	tags=35%, list=31%, signal=51%
GO_INOSITOL_PHOSPHATE_PHOSPHATASE_ACTIVITY	GO_INOSITOL_PHOSPHATE_PHOSPHATASE_ACTIVITY		20	0.313795	0.960074	0.48503	0.627872	1	4612	tags=35%, list=25%, signal=46%
GO_NEGATIVE_REGULATION_OF_EXTRINSIC_APOPTOTIC_SIGNALING_PATHWAY	GO_NEGATIVE_REGULATION_OF_EXTRINSIC_APOPTOTIC_SIGNALING_PATHWAY		97	0.236694	0.959161	0.48583	0.629092	1	3954	tags=27%, list=21%, signal=34%
GO_GMP_METABOLIC_PROCESS	GO_GMP_METABOLIC_PROCESS		20	0.291762	0.957472	0.501002	0.631623	1	5857	tags=55%, list=31%, signal=80%
GO_LIPID_CATABOLIC_PROCESS	GO_LIPID_CATABOLIC_PROCESS		239	0.220246	0.957042	0.51277	0.631952	1	6454	tags=37%, list=34%, signal=56%
GO_NEGATIVE_REGULATION_OF_NUCLEOSIDE_METABOLIC_PROCESS	GO_NEGATIVE_REGULATION_OF_NUCLEOSIDE_METABOLIC_PROCESS		18	0.307821	0.956796	0.506744	0.631946	1	5250	tags=44%, list=28%, signal=62%
GO_GTP_METABOLIC_PROCESS	GO_GTP_METABOLIC_PROCESS		21	0.286103	0.956087	0.520792	0.632767	1	2971	tags=33%, list=16%, signal=40%
GO_NUCLEAR_OUTER_MEMBRANE	GO_NUCLEAR_OUTER_MEMBRANE		19	0.284132	0.954529	0.512621	0.635092	1	4268	tags=42%, list=23%, signal=54%
GO_EXTRINSIC_APOPTOTIC_SIGNALING_PATHWAY	GO_EXTRINSIC_APOPTOTIC_SIGNALING_PATHWAY		98	0.231838	0.954389	0.510081	0.634905	1	4896	tags=29%, list=26%, signal=38%
GO_ATPASE_REGULATOR_ACTIVITY	GO_ATPASE_REGULATOR_ACTIVITY		30	0.299829	0.954234	0.514793	0.634765	1	4969	tags=47%, list=27%, signal=63%
GO_MAMMARY_GLAND_LOBULE_DEVELOPMENT	GO_MAMMARY_GLAND_LOBULE_DEVELOPMENT		17	0.298384	0.951589	0.534043	0.639019	1	2789	tags=29%, list=15%, signal=35%
GO_CLATHRIN_VESICLE_COAT	GO_CLATHRIN_VESICLE_COAT		23	0.301376	0.951057	0.525391	0.639527	1	5754	tags=43%, list=31%, signal=63%
GO_CELLULAR_RESPONSE_TO_ABIOTIC_STIMULUS	GO_CELLULAR_RESPONSE_TO_ABIOTIC_STIMULUS		251	0.193869	0.950822	0.533865	0.639489	1	4896	tags=30%, list=26%, signal=40%
GO_RAC_GTPASE_BINDING	GO_RAC_GTPASE_BINDING		38	0.269836	0.950701	0.514	0.639259	1	3715	tags=26%, list=20%, signal=33%
GO_CYSTEINE_TYPE_ENDOPEPTIDASE_INHIBITOR_ACTIVITY_INVOLVED_IN_APOPTOTIC_PROCESS	GO_CYSTEINE_TYPE_ENDOPEPTIDASE_INHIBITOR_ACTIVITY_INVOLVED_IN_APOPTOTIC_PROCESS		23	0.288189	0.950673	0.54672	0.638882	1	1965	tags=17%, list=11%, signal=19%
GO_DESMOSOME	GO_DESMOSOME		26	0.36314	0.950561	0.511247	0.638641	1	1783	tags=23%, list=10%, signal=25%
GO_PROTEIN_POLYMERIZATION	GO_PROTEIN_POLYMERIZATION		63	0.240657	0.948101	0.550193	0.64254	1	3610	tags=30%, list=19%, signal=37%
GO_REGULATION_OF_PHOSPHATASE_ACTIVITY	GO_REGULATION_OF_PHOSPHATASE_ACTIVITY		117	0.211535	0.9474	0.542744	0.643383	1	6260	tags=43%, list=33%, signal=64%
GO_POSITIVE_REGULATION_OF_STRIATED_MUSCLE_CONTRACTION	GO_POSITIVE_REGULATION_OF_STRIATED_MUSCLE_CONTRACTION		15	0.313744	0.94606	0.518072	0.645315	1	4285	tags=47%, list=23%, signal=60%
GO_REGULATION_OF_PROTEIN_POLYMERIZATION	GO_REGULATION_OF_PROTEIN_POLYMERIZATION		163	0.207221	0.945898	0.547758	0.645195	1	4030	tags=29%, list=22%, signal=36%
GO_REGULATION_OF_GENERATION_OF_PRECURSOR_METABOLITES_AND_ENERGY	GO_REGULATION_OF_GENERATION_OF_PRECURSOR_METABOLITES_AND_ENERGY		82	0.22091	0.944946	0.554493	0.646467	1	4336	tags=32%, list=23%, signal=41%
GO_TRANSFERASE_ACTIVITY_TRANSFERRING_HEXOSYL_GROUPS	GO_TRANSFERASE_ACTIVITY_TRANSFERRING_HEXOSYL_GROUPS		185	0.221318	0.944152	0.516966	0.647457	1	6471	tags=40%, list=35%, signal=61%
GO_VESICLE_MEDIATED_TRANSPORT_BETWEEN_ENDOSOMAL_COMPARTMENTS	GO_VESICLE_MEDIATED_TRANSPORT_BETWEEN_ENDOSOMAL_COMPARTMENTS		19	0.304235	0.942237	0.534791	0.650432	1	5615	tags=47%, list=30%, signal=68%
GO_LIVER_REGENERATION	GO_LIVER_REGENERATION		19	0.304964	0.942147	0.548902	0.650158	1	2246	tags=21%, list=12%, signal=24%
GO_REGULATION_OF_CELLULAR_SENESCENCE	GO_REGULATION_OF_CELLULAR_SENESCENCE		26	0.279669	0.939025	0.551579	0.655328	1	3759	tags=35%, list=20%, signal=43%
GO_RESPONSE_TO_GONADOTROPIN	GO_RESPONSE_TO_GONADOTROPIN		26	0.279378	0.938661	0.558185	0.65556	1	4429	tags=31%, list=24%, signal=40%
GO_POSITIVE_REGULATION_OF_ATPASE_ACTIVITY	GO_POSITIVE_REGULATION_OF_ATPASE_ACTIVITY		41	0.253851	0.938164	0.53891	0.655984	1	1633	tags=20%, list=9%, signal=21%
GO_RESPONSE_TO_ANTIBIOTIC	GO_RESPONSE_TO_ANTIBIOTIC		45	0.256949	0.937905	0.556213	0.655994	1	5268	tags=40%, list=28%, signal=56%
GO_PROTEIN_N_LINKED_GLYCOSYLATION	GO_PROTEIN_N_LINKED_GLYCOSYLATION		74	0.252302	0.937289	0.513026	0.656646	1	4544	tags=36%, list=24%, signal=48%
GO_ORGANOPHOSPHATE_CATABOLIC_PROCESS	GO_ORGANOPHOSPHATE_CATABOLIC_PROCESS		111	0.210415	0.937017	0.581349	0.656688	1	4335	tags=27%, list=23%, signal=35%
GO_NUCLEOSIDE_PHOSPHATE_CATABOLIC_PROCESS	GO_NUCLEOSIDE_PHOSPHATE_CATABOLIC_PROCESS		68	0.225509	0.935698	0.565737	0.658606	1	5833	tags=43%, list=31%, signal=62%
GO_POSITIVE_REGULATION_OF_NEURON_APOPTOTIC_PROCESS	GO_POSITIVE_REGULATION_OF_NEURON_APOPTOTIC_PROCESS		46	0.24743	0.934852	0.518518	0.659667	1	3924	tags=30%, list=21%, signal=38%
GO_PHOSPHATIDIC_ACID_METABOLIC_PROCESS	GO_PHOSPHATIDIC_ACID_METABOLIC_PROCESS		31	0.270769	0.93477	0.536449	0.659371	1	1590	tags=13%, list=8%, signal=14%
GO_SULFUR_COMPOUND_TRANSPORT	GO_SULFUR_COMPOUND_TRANSPORT		32	0.280543	0.934533	0.526733	0.659322	1	6266	tags=38%, list=33%, signal=56%
GO_PHOSPHATIDYLSERINE_ACYL_CHAIN_REMODELING	GO_PHOSPHATIDYLSERINE_ACYL_CHAIN_REMODELING		17	0.324931	0.933776	0.555336	0.660248	1	6920	tags=41%, list=37%, signal=65%
GO_PHOSPHATIDYLINOSITOL_BIOSYNTHETIC_PROCESS	GO_PHOSPHATIDYLINOSITOL_BIOSYNTHETIC_PROCESS		119	0.215418	0.931972	0.541267	0.66302	1	4724	tags=31%, list=25%, signal=41%
GO_FC_GAMMA_RECEPTOR_SIGNALING_PATHWAY	GO_FC_GAMMA_RECEPTOR_SIGNALING_PATHWAY		73	0.258417	0.931633	0.557915	0.66316	1	5390	tags=37%, list=29%, signal=52%
GO_ENDOPLASMIC_RETICULUM_SUBCOMPARTMENT	GO_ENDOPLASMIC_RETICULUM_SUBCOMPARTMENT		15	0.325909	0.930434	0.552434	0.664868	1	232	tags=13%, list=1%, signal=13%
GO_PLACENTA_DEVELOPMENT	GO_PLACENTA_DEVELOPMENT		135	0.215529	0.930271	0.539078	0.664724	1	4935	tags=32%, list=26%, signal=43%
GO_NEGATIVE_REGULATION_OF_GENE_SILENCING	GO_NEGATIVE_REGULATION_OF_GENE_SILENCING		18	0.298946	0.930256	0.550584	0.664308	1	1102	tags=17%, list=6%, signal=18%
GO_CELLULAR_RESPONSE_TO_DEXAMETHASONE_STIMULUS	GO_CELLULAR_RESPONSE_TO_DEXAMETHASONE_STIMULUS		26	0.28931	0.929762	0.557987	0.664761	1	906	tags=15%, list=5%, signal=16%
GO_PHOSPHATIDYLETHANOLAMINE_ACYL_CHAIN_REMODELING	GO_PHOSPHATIDYLETHANOLAMINE_ACYL_CHAIN_REMODELING		23	0.296278	0.929559	0.54065	0.664672	1	6920	tags=48%, list=37%, signal=76%
GO_REGULATION_OF_PROTEIN_HOMODIMERIZATION_ACTIVITY	GO_REGULATION_OF_PROTEIN_HOMODIMERIZATION_ACTIVITY		22	0.281763	0.929305	0.54375	0.664674	1	5415	tags=45%, list=29%, signal=64%
GO_NEGATIVE_REGULATION_OF_NF_KAPPAB_TRANSCRIPTION_FACTOR_ACTIVITY	GO_NEGATIVE_REGULATION_OF_NF_KAPPAB_TRANSCRIPTION_FACTOR_ACTIVITY		61	0.235709	0.927668	0.572614	0.667224	1	3685	tags=28%, list=20%, signal=35%
GO_MHC_PROTEIN_COMPLEX_BINDING	GO_MHC_PROTEIN_COMPLEX_BINDING		18	0.386799	0.927304	0.54509	0.667395	1	5035	tags=33%, list=27%, signal=46%
GO_CELLULAR_PROCESS_INVOLVED_IN_REPRODUCTION_IN_MULTICELLULAR_ORGANISM	GO_CELLULAR_PROCESS_INVOLVED_IN_REPRODUCTION_IN_MULTICELLULAR_ORGANISM		223	0.199144	0.927199	0.569138	0.667127	1	4559	tags=27%, list=24%, signal=35%
GO_REGULATION_OF_TRANSCRIPTION_FROM_RNA_POLYMERASE_III_PROMOTER	GO_REGULATION_OF_TRANSCRIPTION_FROM_RNA_POLYMERASE_III_PROMOTER		20	0.292319	0.926971	0.546693	0.667078	1	7609	tags=70%, list=41%, signal=118%
GO_CYCLIN_BINDING	GO_CYCLIN_BINDING		19	0.28712	0.926747	0.547521	0.667047	1	4685	tags=37%, list=25%, signal=49%
GO_ATP_HYDROLYSIS_COUPLED_TRANSMEMBRANE_TRANSPORT	GO_ATP_HYDROLYSIS_COUPLED_TRANSMEMBRANE_TRANSPORT		36	0.282571	0.92529	0.539961	0.669146	1	6137	tags=44%, list=33%, signal=66%
GO_PEPTIDE_CATABOLIC_PROCESS	GO_PEPTIDE_CATABOLIC_PROCESS		22	0.293472	0.924941	0.543086	0.669336	1	4589	tags=27%, list=25%, signal=36%
GO_IN_UTERO_EMBRYONIC_DEVELOPMENT	GO_IN_UTERO_EMBRYONIC_DEVELOPMENT		303	0.197547	0.924453	0.570297	0.669738	1	3198	tags=22%, list=17%, signal=26%
GO_REGULATION_OF_RESPONSE_TO_BIOTIC_STIMULUS	GO_REGULATION_OF_RESPONSE_TO_BIOTIC_STIMULUS		224	0.199811	0.923971	0.546906	0.67016	1	6137	tags=41%, list=33%, signal=60%
GO_NEGATIVE_REGULATION_OF_DEFENSE_RESPONSE_TO_VIRUS	GO_NEGATIVE_REGULATION_OF_DEFENSE_RESPONSE_TO_VIRUS		17	0.303526	0.9234	0.536735	0.670706	1	4487	tags=35%, list=24%, signal=46%
GO_RIBONUCLEOSIDE_CATABOLIC_PROCESS	GO_RIBONUCLEOSIDE_CATABOLIC_PROCESS		24	0.289985	0.923351	0.576	0.670353	1	5578	tags=33%, list=30%, signal=47%
GO_SULFUR_AMINO_ACID_BIOSYNTHETIC_PROCESS	GO_SULFUR_AMINO_ACID_BIOSYNTHETIC_PROCESS		19	0.308907	0.922467	0.543611	0.671444	1	5612	tags=58%, list=30%, signal=83%
GO_RESPONSE_TO_COPPER_ION	GO_RESPONSE_TO_COPPER_ION		27	0.268518	0.921127	0.549902	0.673406	1	3715	tags=30%, list=20%, signal=37%
GO_MEMBRANE_PROTEIN_ECTODOMAIN_PROTEOLYSIS	GO_MEMBRANE_PROTEIN_ECTODOMAIN_PROTEOLYSIS		21	0.291914	0.921071	0.558541	0.673066	1	3473	tags=33%, list=19%, signal=41%
GO_POSITIVE_REGULATION_OF_INNATE_IMMUNE_RESPONSE	GO_POSITIVE_REGULATION_OF_INNATE_IMMUNE_RESPONSE		242	0.240206	0.920529	0.557809	0.673615	1	5684	tags=38%, list=30%, signal=54%
GO_CELL_DEATH_IN_RESPONSE_TO_OXIDATIVE_STRESS	GO_CELL_DEATH_IN_RESPONSE_TO_OXIDATIVE_STRESS		18	0.312478	0.920231	0.534483	0.673705	1	4585	tags=50%, list=25%, signal=66%
GO_PEPTIDE_ANTIGEN_BINDING	GO_PEPTIDE_ANTIGEN_BINDING		26	0.351292	0.918912	0.540323	0.675696	1	6117	tags=42%, list=33%, signal=63%
GO_NECROTIC_CELL_DEATH	GO_NECROTIC_CELL_DEATH		28	0.304188	0.91869	0.559524	0.675628	1	5571	tags=46%, list=30%, signal=66%
GO_OOGENESIS	GO_OOGENESIS		61	0.237783	0.918595	0.625247	0.675366	1	5757	tags=31%, list=31%, signal=45%
GO_NEGATIVE_REGULATION_OF_MITOCHONDRION_ORGANIZATION	GO_NEGATIVE_REGULATION_OF_MITOCHONDRION_ORGANIZATION		35	0.258504	0.918486	0.58317	0.675118	1	4053	tags=34%, list=22%, signal=44%
GO_LIPID_HOMEOSTASIS	GO_LIPID_HOMEOSTASIS		104	0.240335	0.916577	0.561205	0.678137	1	5797	tags=36%, list=31%, signal=51%
GO_POSITIVE_REGULATION_OF_MICROTUBULE_POLYMERIZATION_OR_DEPOLYMERIZATION	GO_POSITIVE_REGULATION_OF_MICROTUBULE_POLYMERIZATION_OR_DEPOLYMERIZATION		22	0.286156	0.915449	0.582061	0.67973	1	3644	tags=32%, list=19%, signal=39%
GO_RESPONSE_TO_TOXIC_SUBSTANCE	GO_RESPONSE_TO_TOXIC_SUBSTANCE		231	0.195142	0.914817	0.633262	0.680408	1	5268	tags=32%, list=28%, signal=43%
GO_HYDROLASE_ACTIVITY_HYDROLYZING_O_GLYCOSYL_COMPOUNDS	GO_HYDROLASE_ACTIVITY_HYDROLYZING_O_GLYCOSYL_COMPOUNDS		89	0.22577	0.914153	0.598837	0.681119	1	7787	tags=42%, list=42%, signal=71%
GO_PYRIMIDINE_CONTAINING_COMPOUND_CATABOLIC_PROCESS	GO_PYRIMIDINE_CONTAINING_COMPOUND_CATABOLIC_PROCESS		31	0.272458	0.912567	0.610417	0.683483	1	5510	tags=32%, list=29%, signal=46%
GO_DENDRITIC_SPINE_ORGANIZATION	GO_DENDRITIC_SPINE_ORGANIZATION		17	0.301893	0.912429	0.558712	0.683275	1	3972	tags=35%, list=21%, signal=45%
GO_PROTEIN_INSERTION_INTO_MEMBRANE	GO_PROTEIN_INSERTION_INTO_MEMBRANE		22	0.286857	0.911408	0.584615	0.684572	1	5979	tags=41%, list=32%, signal=60%
GO_EPITHELIAL_STRUCTURE_MAINTENANCE	GO_EPITHELIAL_STRUCTURE_MAINTENANCE		20	0.282971	0.908236	0.583826	0.689777	1	4362	tags=30%, list=23%, signal=39%
GO_ORGANELLE_FUSION	GO_ORGANELLE_FUSION		121	0.205417	0.907889	0.621469	0.689947	1	5829	tags=36%, list=31%, signal=51%
GO_AXO_DENDRITIC_TRANSPORT	GO_AXO_DENDRITIC_TRANSPORT		33	0.259613	0.907479	0.574109	0.690227	1	6102	tags=36%, list=33%, signal=54%
GO_NEGATIVE_REGULATION_OF_PROTEIN_COMPLEX_ASSEMBLY	GO_NEGATIVE_REGULATION_OF_PROTEIN_COMPLEX_ASSEMBLY		101	0.205863	0.905937	0.616896	0.692537	1	5841	tags=42%, list=31%, signal=60%
GO_POSITIVE_REGULATION_OF_CELLULAR_RESPONSE_TO_INSULIN_STIMULUS	GO_POSITIVE_REGULATION_OF_CELLULAR_RESPONSE_TO_INSULIN_STIMULUS		20	0.280036	0.905798	0.583019	0.692333	1	1707	tags=15%, list=9%, signal=16%
GO_RESPONSE_TO_DSRNA	GO_RESPONSE_TO_DSRNA		55	0.236274	0.905752	0.579592	0.691966	1	6174	tags=42%, list=33%, signal=62%
GO_ANDROGEN_RECEPTOR_BINDING	GO_ANDROGEN_RECEPTOR_BINDING		39	0.262512	0.904472	0.570039	0.693851	1	5121	tags=41%, list=27%, signal=56%
GO_REGULATION_OF_DEPHOSPHORYLATION	GO_REGULATION_OF_DEPHOSPHORYLATION		145	0.198302	0.903801	0.650391	0.694625	1	4885	tags=32%, list=26%, signal=44%
GO_CARBOXYLIC_ESTER_HYDROLASE_ACTIVITY	GO_CARBOXYLIC_ESTER_HYDROLASE_ACTIVITY		126	0.206366	0.90374	0.659319	0.694275	1	4485	tags=24%, list=24%, signal=31%
GO_L_ALPHA_AMINO_ACID_TRANSMEMBRANE_TRANSPORT	GO_L_ALPHA_AMINO_ACID_TRANSMEMBRANE_TRANSPORT		31	0.273046	0.903703	0.580838	0.693893	1	3041	tags=19%, list=16%, signal=23%
GO_NEGATIVE_REGULATION_OF_DENDRITE_DEVELOPMENT	GO_NEGATIVE_REGULATION_OF_DENDRITE_DEVELOPMENT		27	0.261249	0.902339	0.626459	0.69592	1	3567	tags=30%, list=19%, signal=37%
GO_POSITIVE_REGULATION_OF_DNA_RECOMBINATION	GO_POSITIVE_REGULATION_OF_DNA_RECOMBINATION		17	0.318807	0.90072	0.554672	0.698406	1	3631	tags=29%, list=19%, signal=36%
GO_MEMBRANE_LIPID_BIOSYNTHETIC_PROCESS	GO_MEMBRANE_LIPID_BIOSYNTHETIC_PROCESS		107	0.210863	0.899821	0.586873	0.699562	1	4194	tags=29%, list=22%, signal=37%
GO_RNA_POLYMERASE_II_TRANSCRIPTION_COFACTOR_ACTIVITY	GO_RNA_POLYMERASE_II_TRANSCRIPTION_COFACTOR_ACTIVITY		89	0.216934	0.899778	0.631373	0.699188	1	4119	tags=28%, list=22%, signal=36%
GO_VACUOLE_ORGANIZATION	GO_VACUOLE_ORGANIZATION		156	0.217738	0.899301	0.592955	0.699634	1	6717	tags=42%, list=36%, signal=65%
GO_DIOXYGENASE_ACTIVITY	GO_DIOXYGENASE_ACTIVITY		78	0.216308	0.898532	0.63308	0.700564	1	5999	tags=41%, list=32%, signal=60%
GO_COP9_SIGNALOSOME	GO_COP9_SIGNALOSOME		31	0.264636	0.898055	0.591286	0.700958	1	5988	tags=45%, list=32%, signal=66%
GO_RESPONSE_TO_TRANSITION_METAL_NANOPARTICLE	GO_RESPONSE_TO_TRANSITION_METAL_NANOPARTICLE		144	0.203144	0.897805	0.65748	0.700943	1	5062	tags=30%, list=27%, signal=41%
GO_ZINC_ION_HOMEOSTASIS	GO_ZINC_ION_HOMEOSTASIS		20	0.276872	0.897436	0.633266	0.701152	1	7758	tags=55%, list=41%, signal=94%
GO_RESPONSE_TO_INTERFERON_BETA	GO_RESPONSE_TO_INTERFERON_BETA		20	0.340728	0.896785	0.567404	0.701919	1	3924	tags=30%, list=21%, signal=38%
GO_FATTY_ACID_METABOLIC_PROCESS	GO_FATTY_ACID_METABOLIC_PROCESS		282	0.20016	0.896281	0.645291	0.702376	1	5099	tags=33%, list=27%, signal=44%
GO_DICARBOXYLIC_ACID_TRANSMEMBRANE_TRANSPORTER_ACTIVITY	GO_DICARBOXYLIC_ACID_TRANSMEMBRANE_TRANSPORTER_ACTIVITY		33	0.256069	0.895212	0.596422	0.70384	1	423	tags=9%, list=2%, signal=9%
GO_NEGATIVE_REGULATION_OF_SEQUENCE_SPECIFIC_DNA_BINDING_TRANSCRIPTION_FACTOR_ACTIVITY	GO_NEGATIVE_REGULATION_OF_SEQUENCE_SPECIFIC_DNA_BINDING_TRANSCRIPTION_FACTOR_ACTIVITY		128	0.19743	0.893337	0.653101	0.706735	1	4137	tags=27%, list=22%, signal=35%
GO_POSITIVE_REGULATION_OF_PROTEIN_COMPLEX_DISASSEMBLY	GO_POSITIVE_REGULATION_OF_PROTEIN_COMPLEX_DISASSEMBLY		22	0.270125	0.892374	0.606996	0.708004	1	3779	tags=36%, list=20%, signal=46%
GO_ECTODERM_DEVELOPMENT	GO_ECTODERM_DEVELOPMENT		20	0.288758	0.892341	0.610101	0.707606	1	6836	tags=55%, list=37%, signal=87%
GO_TRANSITION_METAL_ION_HOMEOSTASIS	GO_TRANSITION_METAL_ION_HOMEOSTASIS		100	0.212243	0.891887	0.636364	0.707958	1	5135	tags=32%, list=27%, signal=44%
GO_NON_MEMBRANE_SPANNING_PROTEIN_TYROSINE_KINASE_ACTIVITY	GO_NON_MEMBRANE_SPANNING_PROTEIN_TYROSINE_KINASE_ACTIVITY		45	0.266721	0.891877	0.593688	0.707518	1	3942	tags=33%, list=21%, signal=42%
GO_MULTICELLULAR_ORGANISM_GROWTH	GO_MULTICELLULAR_ORGANISM_GROWTH		75	0.216849	0.891503	0.649254	0.70775	1	2055	tags=16%, list=11%, signal=18%
GO_PROTEIN_TYROSINE_PHOSPHATASE_ACTIVITY	GO_PROTEIN_TYROSINE_PHOSPHATASE_ACTIVITY		98	0.207519	0.89028	0.64881	0.709465	1	3086	tags=21%, list=16%, signal=26%
GO_ORGANIC_CATION_TRANSPORT	GO_ORGANIC_CATION_TRANSPORT		19	0.299277	0.889301	0.592803	0.710712	1	2141	tags=16%, list=11%, signal=18%
GO_PRODUCTION_OF_MOLECULAR_MEDIATOR_OF_IMMUNE_RESPONSE	GO_PRODUCTION_OF_MOLECULAR_MEDIATOR_OF_IMMUNE_RESPONSE		58	0.256737	0.887924	0.578512	0.712676	1	5368	tags=36%, list=29%, signal=51%
GO_COATED_VESICLE	GO_COATED_VESICLE		228	0.211732	0.88759	0.586338	0.712854	1	4560	tags=29%, list=24%, signal=38%
GO_FATTY_ACID_BIOSYNTHETIC_PROCESS	GO_FATTY_ACID_BIOSYNTHETIC_PROCESS		102	0.207028	0.887254	0.666667	0.713011	1	4701	tags=32%, list=25%, signal=43%
GO_MHC_PROTEIN_BINDING	GO_MHC_PROTEIN_BINDING		26	0.337754	0.886922	0.556641	0.713127	1	5204	tags=42%, list=28%, signal=59%
GO_GLYCEROPHOSPHOLIPID_METABOLIC_PROCESS	GO_GLYCEROPHOSPHOLIPID_METABOLIC_PROCESS		287	0.180323	0.886688	0.686907	0.713089	1	4317	tags=24%, list=23%, signal=31%
GO_RUFFLE_ORGANIZATION	GO_RUFFLE_ORGANIZATION		20	0.286017	0.886294	0.627184	0.713315	1	3423	tags=40%, list=18%, signal=49%
GO_SULFUR_COMPOUND_METABOLIC_PROCESS	GO_SULFUR_COMPOUND_METABOLIC_PROCESS		343	0.191366	0.88605	0.664646	0.713289	1	4701	tags=30%, list=25%, signal=39%
GO_ORGANIC_HYDROXY_COMPOUND_METABOLIC_PROCESS	GO_ORGANIC_HYDROXY_COMPOUND_METABOLIC_PROCESS		472	0.183305	0.885042	0.694553	0.71463	1	5929	tags=33%, list=32%, signal=47%
GO_CELLULAR_TRANSITION_METAL_ION_HOMEOSTASIS	GO_CELLULAR_TRANSITION_METAL_ION_HOMEOSTASIS		73	0.224192	0.884971	0.648221	0.714303	1	5075	tags=34%, list=27%, signal=47%
GO_REGULATION_OF_INTERFERON_BETA_PRODUCTION	GO_REGULATION_OF_INTERFERON_BETA_PRODUCTION		43	0.258943	0.884469	0.590814	0.714768	1	5815	tags=44%, list=31%, signal=64%
GO_STEROID_HORMONE_MEDIATED_SIGNALING_PATHWAY	GO_STEROID_HORMONE_MEDIATED_SIGNALING_PATHWAY		121	0.207164	0.884198	0.686424	0.714802	1	5088	tags=32%, list=27%, signal=44%
GO_CYTOSOLIC_TRANSPORT	GO_CYTOSOLIC_TRANSPORT		198	0.20058	0.884044	0.635674	0.714615	1	6102	tags=36%, list=33%, signal=53%
GO_COPPER_ION_HOMEOSTASIS	GO_COPPER_ION_HOMEOSTASIS		16	0.303469	0.883716	0.606299	0.714734	1	3513	tags=31%, list=19%, signal=38%
GO_CELLULAR_RESPONSE_TO_ESTROGEN_STIMULUS	GO_CELLULAR_RESPONSE_TO_ESTROGEN_STIMULUS		39	0.244098	0.883346	0.664609	0.714924	1	927	tags=13%, list=5%, signal=13%
GO_OXIDOREDUCTASE_ACTIVITY_OXIDIZING_METAL_IONS	GO_OXIDOREDUCTASE_ACTIVITY_OXIDIZING_METAL_IONS		17	0.304797	0.882002	0.59798	0.716843	1	5540	tags=53%, list=30%, signal=75%
GO_LYSOSOMAL_TRANSPORT	GO_LYSOSOMAL_TRANSPORT		65	0.233383	0.881984	0.632768	0.716424	1	5747	tags=45%, list=31%, signal=64%
GO_MODIFICATION_BY_SYMBIONT_OF_HOST_MORPHOLOGY_OR_PHYSIOLOGY	GO_MODIFICATION_BY_SYMBIONT_OF_HOST_MORPHOLOGY_OR_PHYSIOLOGY		44	0.237789	0.8809	0.651515	0.717894	1	1826	tags=18%, list=10%, signal=20%
GO_REGULATION_OF_MONOOXYGENASE_ACTIVITY	GO_REGULATION_OF_MONOOXYGENASE_ACTIVITY		58	0.221731	0.880727	0.656504	0.717738	1	6085	tags=41%, list=33%, signal=61%
GO_SPERM_MOTILITY	GO_SPERM_MOTILITY		39	0.256342	0.879684	0.62963	0.719126	1	3687	tags=23%, list=20%, signal=29%
GO_PORE_COMPLEX	GO_PORE_COMPLEX		17	0.321547	0.879633	0.617769	0.718769	1	2317	tags=29%, list=12%, signal=34%
GO_PROTEIN_SERINE_THREONINE_TYROSINE_KINASE_ACTIVITY	GO_PROTEIN_SERINE_THREONINE_TYROSINE_KINASE_ACTIVITY		39	0.235978	0.879159	0.629126	0.719168	1	4845	tags=36%, list=26%, signal=48%
GO_CORTICAL_CYTOSKELETON_ORGANIZATION	GO_CORTICAL_CYTOSKELETON_ORGANIZATION		34	0.249822	0.879049	0.632937	0.718902	1	1965	tags=21%, list=11%, signal=23%
GO_RESPONSE_TO_INTERLEUKIN_4	GO_RESPONSE_TO_INTERLEUKIN_4		29	0.266492	0.876873	0.647773	0.72238	1	4359	tags=31%, list=23%, signal=40%
GO_ANATOMICAL_STRUCTURE_ARRANGEMENT	GO_ANATOMICAL_STRUCTURE_ARRANGEMENT		17	0.295058	0.873587	0.620301	0.727832	1	3142	tags=29%, list=17%, signal=35%
GO_RESPONSE_TO_AMMONIUM_ION	GO_RESPONSE_TO_AMMONIUM_ION		48	0.2237	0.873323	0.679537	0.727832	1	2596	tags=17%, list=14%, signal=19%
GO_ANION_ANION_ANTIPORTER_ACTIVITY	GO_ANION_ANION_ANTIPORTER_ACTIVITY		22	0.290704	0.872586	0.613227	0.728643	1	5124	tags=32%, list=27%, signal=44%
GO_CIS_GOLGI_NETWORK	GO_CIS_GOLGI_NETWORK		38	0.253292	0.871709	0.62549	0.729735	1	7725	tags=68%, list=41%, signal=116%
GO_AMMONIUM_ION_METABOLIC_PROCESS	GO_AMMONIUM_ION_METABOLIC_PROCESS		166	0.187148	0.869062	0.706334	0.734054	1	6823	tags=40%, list=36%, signal=62%
GO_PROTEIN_LOCALIZATION_TO_MEMBRANE	GO_PROTEIN_LOCALIZATION_TO_MEMBRANE		371	0.197883	0.869015	0.572266	0.733672	1	5353	tags=38%, list=29%, signal=52%
GO_ETHANOLAMINE_CONTAINING_COMPOUND_METABOLIC_PROCESS	GO_ETHANOLAMINE_CONTAINING_COMPOUND_METABOLIC_PROCESS		84	0.211518	0.868766	0.675624	0.733666	1	6920	tags=43%, list=37%, signal=68%
GO_POSITIVE_REGULATION_OF_NEURON_DEATH	GO_POSITIVE_REGULATION_OF_NEURON_DEATH		66	0.215545	0.86857	0.644578	0.733529	1	3924	tags=29%, list=21%, signal=36%
GO_TRANSFERASE_ACTIVITY_TRANSFERRING_GLYCOSYL_GROUPS	GO_TRANSFERASE_ACTIVITY_TRANSFERRING_GLYCOSYL_GROUPS		259	0.183298	0.868353	0.69112	0.73347	1	6471	tags=38%, list=35%, signal=58%
GO_COATED_VESICLE_MEMBRANE	GO_COATED_VESICLE_MEMBRANE		133	0.218947	0.86835	0.640777	0.733017	1	5120	tags=36%, list=27%, signal=49%
GO_CELLULAR_CARBOHYDRATE_CATABOLIC_PROCESS	GO_CELLULAR_CARBOHYDRATE_CATABOLIC_PROCESS		31	0.255643	0.867288	0.653307	0.734415	1	7003	tags=52%, list=37%, signal=82%
GO_MODIFICATION_OF_MORPHOLOGY_OR_PHYSIOLOGY_OF_OTHER_ORGANISM	GO_MODIFICATION_OF_MORPHOLOGY_OR_PHYSIOLOGY_OF_OTHER_ORGANISM		97	0.216314	0.86579	0.695391	0.73658	1	4595	tags=26%, list=25%, signal=34%
GO_POSITIVE_REGULATION_OF_GLIAL_CELL_DIFFERENTIATION	GO_POSITIVE_REGULATION_OF_GLIAL_CELL_DIFFERENTIATION		31	0.235503	0.863865	0.657563	0.739522	1	4429	tags=32%, list=24%, signal=42%
GO_RNA_POLYMERASE_II_TRANSCRIPTION_COREPRESSOR_ACTIVITY	GO_RNA_POLYMERASE_II_TRANSCRIPTION_COREPRESSOR_ACTIVITY		25	0.261974	0.863429	0.676707	0.739838	1	980	tags=16%, list=5%, signal=17%
GO_TUMOR_NECROSIS_FACTOR_RECEPTOR_SUPERFAMILY_BINDING	GO_TUMOR_NECROSIS_FACTOR_RECEPTOR_SUPERFAMILY_BINDING		44	0.254249	0.862142	0.630769	0.741641	1	2872	tags=25%, list=15%, signal=29%
GO_FERTILIZATION	GO_FERTILIZATION		134	0.217055	0.861495	0.655391	0.742319	1	5360	tags=27%, list=29%, signal=37%
GO_CLATHRIN_MEDIATED_ENDOCYTOSIS	GO_CLATHRIN_MEDIATED_ENDOCYTOSIS		35	0.258174	0.861468	0.641434	0.7419	1	3231	tags=26%, list=17%, signal=31%
GO_PIGMENT_GRANULE_LOCALIZATION	GO_PIGMENT_GRANULE_LOCALIZATION		23	0.261852	0.861217	0.658203	0.741885	1	6479	tags=43%, list=35%, signal=66%
GO_SPERM_FLAGELLUM	GO_SPERM_FLAGELLUM		52	0.223565	0.860995	0.649606	0.741811	1	3445	tags=19%, list=18%, signal=24%
GO_LATE_ENDOSOME_MEMBRANE	GO_LATE_ENDOSOME_MEMBRANE		95	0.221637	0.860866	0.646035	0.741593	1	6562	tags=40%, list=35%, signal=61%
GO_ERBB2_SIGNALING_PATHWAY	GO_ERBB2_SIGNALING_PATHWAY		38	0.239344	0.860443	0.638418	0.741877	1	7514	tags=55%, list=40%, signal=92%
GO_REGULATION_OF_STEROID_METABOLIC_PROCESS	GO_REGULATION_OF_STEROID_METABOLIC_PROCESS		73	0.225295	0.859436	0.705653	0.743175	1	5870	tags=38%, list=31%, signal=56%
GO_CELLULAR_RESPONSE_TO_GLUCOSE_STARVATION	GO_CELLULAR_RESPONSE_TO_GLUCOSE_STARVATION		30	0.249974	0.859391	0.643585	0.742797	1	5300	tags=40%, list=28%, signal=56%
GO_LABYRINTHINE_LAYER_DEVELOPMENT	GO_LABYRINTHINE_LAYER_DEVELOPMENT		43	0.241033	0.858387	0.652	0.744086	1	4138	tags=30%, list=22%, signal=39%
GO_RESPONSE_TO_LEAD_ION	GO_RESPONSE_TO_LEAD_ION		20	0.264062	0.85821	0.675403	0.743932	1	1390	tags=15%, list=7%, signal=16%
GO_NEGATIVE_REGULATION_OF_RESPONSE_TO_BIOTIC_STIMULUS	GO_NEGATIVE_REGULATION_OF_RESPONSE_TO_BIOTIC_STIMULUS		26	0.260427	0.858073	0.651546	0.743719	1	2255	tags=19%, list=12%, signal=22%
GO_CELL_CELL_RECOGNITION	GO_CELL_CELL_RECOGNITION		58	0.24133	0.858061	0.644309	0.743283	1	2002	tags=14%, list=11%, signal=15%
GO_HAIR_CELL_DIFFERENTIATION	GO_HAIR_CELL_DIFFERENTIATION		34	0.241618	0.857372	0.693957	0.744031	1	7489	tags=47%, list=40%, signal=78%
GO_NEGATIVE_REGULATION_OF_MULTI_ORGANISM_PROCESS	GO_NEGATIVE_REGULATION_OF_MULTI_ORGANISM_PROCESS		141	0.218448	0.856291	0.644033	0.745466	1	1107	tags=11%, list=6%, signal=12%
GO_STEROID_BIOSYNTHETIC_PROCESS	GO_STEROID_BIOSYNTHETIC_PROCESS		109	0.218973	0.85553	0.674286	0.74635	1	6971	tags=49%, list=37%, signal=77%
GO_REGULATION_OF_PROTEIN_DEACETYLATION	GO_REGULATION_OF_PROTEIN_DEACETYLATION		33	0.24833	0.854997	0.669903	0.746821	1	5311	tags=48%, list=28%, signal=68%
GO_ORGAN_OR_TISSUE_SPECIFIC_IMMUNE_RESPONSE	GO_ORGAN_OR_TISSUE_SPECIFIC_IMMUNE_RESPONSE		29	0.285793	0.851909	0.642553	0.751801	1	4629	tags=28%, list=25%, signal=37%
GO_PEPTIDYL_CYSTEINE_MODIFICATION	GO_PEPTIDYL_CYSTEINE_MODIFICATION		20	0.28031	0.851875	0.64959	0.751403	1	4135	tags=35%, list=22%, signal=45%
GO_DNA_DEMETHYLATION	GO_DNA_DEMETHYLATION		15	0.304056	0.850609	0.674797	0.753171	1	5284	tags=40%, list=28%, signal=56%
GO_CYTOPLASMIC_SEQUESTERING_OF_PROTEIN	GO_CYTOPLASMIC_SEQUESTERING_OF_PROTEIN		40	0.252035	0.848706	0.688391	0.756075	1	5075	tags=50%, list=27%, signal=68%
GO_MEMBRANE_FUSION	GO_MEMBRANE_FUSION		143	0.186881	0.848249	0.753759	0.75642	1	5829	tags=33%, list=31%, signal=47%
GO_INTRACILIARY_TRANSPORT_PARTICLE	GO_INTRACILIARY_TRANSPORT_PARTICLE		29	0.281589	0.847891	0.625	0.756561	1	4891	tags=31%, list=26%, signal=42%
GO_TRANSCRIPTION_COREPRESSOR_ACTIVITY	GO_TRANSCRIPTION_COREPRESSOR_ACTIVITY		213	0.183558	0.846554	0.732535	0.758447	1	3060	tags=19%, list=16%, signal=22%
GO_REGULATION_OF_FATTY_ACID_METABOLIC_PROCESS	GO_REGULATION_OF_FATTY_ACID_METABOLIC_PROCESS		84	0.211994	0.844027	0.7154	0.76236	1	5670	tags=37%, list=30%, signal=53%
GO_REGULATION_OF_INNATE_IMMUNE_RESPONSE	GO_REGULATION_OF_INNATE_IMMUNE_RESPONSE		336	0.21344	0.843914	0.634578	0.762087	1	4595	tags=29%, list=25%, signal=37%
GO_COBALAMIN_METABOLIC_PROCESS	GO_COBALAMIN_METABOLIC_PROCESS		21	0.338121	0.843189	0.718232	0.762865	1	3117	tags=29%, list=17%, signal=34%
GO_MYOSIN_V_BINDING	GO_MYOSIN_V_BINDING		17	0.306885	0.843094	0.626953	0.762552	1	4470	tags=41%, list=24%, signal=54%
GO_EMBRYONIC_PLACENTA_DEVELOPMENT	GO_EMBRYONIC_PLACENTA_DEVELOPMENT		82	0.21142	0.842652	0.676471	0.76285	1	4138	tags=26%, list=22%, signal=33%
GO_REGULATION_OF_AUTOPHAGY	GO_REGULATION_OF_AUTOPHAGY		242	0.181169	0.840138	0.727273	0.76683	1	5615	tags=35%, list=30%, signal=49%
GO_LRR_DOMAIN_BINDING	GO_LRR_DOMAIN_BINDING		17	0.292244	0.838677	0.654	0.76893	1	6577	tags=59%, list=35%, signal=91%
GO_CELLULAR_RESPONSE_TO_INSULIN_STIMULUS	GO_CELLULAR_RESPONSE_TO_INSULIN_STIMULUS		141	0.188195	0.838182	0.795841	0.769346	1	3375	tags=21%, list=18%, signal=25%
GO_WIDE_PORE_CHANNEL_ACTIVITY	GO_WIDE_PORE_CHANNEL_ACTIVITY		23	0.257035	0.837853	0.691057	0.769442	1	2317	tags=17%, list=12%, signal=20%
GO_POSITIVE_REGULATION_OF_T_CELL_MEDIATED_IMMUNITY	GO_POSITIVE_REGULATION_OF_T_CELL_MEDIATED_IMMUNITY		31	0.265001	0.835211	0.637236	0.773558	1	2253	tags=16%, list=12%, signal=18%
GO_NEGATIVE_REGULATION_OF_LYMPHOCYTE_APOPTOTIC_PROCESS	GO_NEGATIVE_REGULATION_OF_LYMPHOCYTE_APOPTOTIC_PROCESS		27	0.263833	0.835044	0.664729	0.773375	1	1532	tags=15%, list=8%, signal=16%
GO_PEPTIDYL_TYROSINE_AUTOPHOSPHORYLATION	GO_PEPTIDYL_TYROSINE_AUTOPHOSPHORYLATION		39	0.266329	0.834299	0.637965	0.774158	1	3861	tags=33%, list=21%, signal=42%
GO_POSITIVE_REGULATION_OF_INTERLEUKIN_6_SECRETION	GO_POSITIVE_REGULATION_OF_INTERLEUKIN_6_SECRETION		15	0.299977	0.83392	0.654348	0.77438	1	2076	tags=20%, list=11%, signal=22%
GO_RESPONSE_TO_INSULIN	GO_RESPONSE_TO_INSULIN		199	0.178968	0.833766	0.821092	0.774183	1	5458	tags=30%, list=29%, signal=41%
GO_REGULATION_OF_LIPID_BIOSYNTHETIC_PROCESS	GO_REGULATION_OF_LIPID_BIOSYNTHETIC_PROCESS		121	0.196865	0.83293	0.762089	0.775214	1	6602	tags=43%, list=35%, signal=66%
GO_POSITIVE_REGULATION_OF_EXOCYTOSIS	GO_POSITIVE_REGULATION_OF_EXOCYTOSIS		82	0.202501	0.832789	0.742	0.774993	1	6972	tags=40%, list=37%, signal=64%
GO_COFACTOR_CATABOLIC_PROCESS	GO_COFACTOR_CATABOLIC_PROCESS		20	0.283405	0.832685	0.650099	0.774693	1	6351	tags=40%, list=34%, signal=60%
GO_MOTILE_CILIUM	GO_MOTILE_CILIUM		96	0.212486	0.832287	0.702	0.774884	1	3687	tags=17%, list=20%, signal=21%
GO_SUMO_TRANSFERASE_ACTIVITY	GO_SUMO_TRANSFERASE_ACTIVITY		15	0.287387	0.830355	0.693387	0.777793	1	7166	tags=53%, list=38%, signal=86%
GO_RESPONSE_TO_VITAMIN_E	GO_RESPONSE_TO_VITAMIN_E		15	0.279877	0.830346	0.697531	0.777334	1	3133	tags=27%, list=17%, signal=32%
GO_NEGATIVE_REGULATION_OF_PROTEIN_KINASE_B_SIGNALING	GO_NEGATIVE_REGULATION_OF_PROTEIN_KINASE_B_SIGNALING		33	0.236198	0.829242	0.720792	0.778831	1	5857	tags=36%, list=31%, signal=53%
GO_NEGATIVE_REGULATION_OF_CIRCADIAN_RHYTHM	GO_NEGATIVE_REGULATION_OF_CIRCADIAN_RHYTHM		16	0.291504	0.828894	0.660853	0.778925	1	1472	tags=19%, list=8%, signal=20%
GO_NEGATIVE_REGULATION_OF_RESPONSE_TO_OXIDATIVE_STRESS	GO_NEGATIVE_REGULATION_OF_RESPONSE_TO_OXIDATIVE_STRESS		31	0.25557	0.826178	0.680723	0.783119	1	4980	tags=35%, list=27%, signal=48%
GO_POSITIVE_REGULATION_OF_CELL_CYCLE_G2_M_PHASE_TRANSITION	GO_POSITIVE_REGULATION_OF_CELL_CYCLE_G2_M_PHASE_TRANSITION		18	0.274121	0.823955	0.699605	0.786458	1	3509	tags=33%, list=19%, signal=41%
GO_AMINE_METABOLIC_PROCESS	GO_AMINE_METABOLIC_PROCESS		127	0.181855	0.821065	0.824803	0.790976	1	6595	tags=38%, list=35%, signal=58%
GO_PLACENTA_BLOOD_VESSEL_DEVELOPMENT	GO_PLACENTA_BLOOD_VESSEL_DEVELOPMENT		28	0.251751	0.819771	0.682	0.79273	1	3923	tags=32%, list=21%, signal=41%
GO_ROUGH_ENDOPLASMIC_RETICULUM	GO_ROUGH_ENDOPLASMIC_RETICULUM		68	0.217061	0.819491	0.739623	0.792754	1	3394	tags=26%, list=18%, signal=32%
GO_NEGATIVE_REGULATION_OF_CELL_AGING	GO_NEGATIVE_REGULATION_OF_CELL_AGING		16	0.285916	0.817513	0.697581	0.795737	1	4439	tags=31%, list=24%, signal=41%
GO_AMELOGENESIS	GO_AMELOGENESIS		19	0.266122	0.817459	0.731898	0.795347	1	1249	tags=16%, list=7%, signal=17%
GO_LUNG_EPITHELIUM_DEVELOPMENT	GO_LUNG_EPITHELIUM_DEVELOPMENT		34	0.234979	0.817193	0.73494	0.795345	1	3917	tags=24%, list=21%, signal=30%
GO_CYTOPLASMIC_SEQUESTERING_OF_TRANSCRIPTION_FACTOR	GO_CYTOPLASMIC_SEQUESTERING_OF_TRANSCRIPTION_FACTOR		19	0.272613	0.815977	0.704819	0.79699	1	6423	tags=68%, list=34%, signal=104%
GO_MALE_MEIOSIS	GO_MALE_MEIOSIS		35	0.260048	0.814965	0.690832	0.798245	1	5458	tags=26%, list=29%, signal=36%
GO_OOCYTE_DIFFERENTIATION	GO_OOCYTE_DIFFERENTIATION		35	0.23404	0.814056	0.747515	0.799327	1	5757	tags=34%, list=31%, signal=49%
GO_REGULATION_OF_PROTEIN_SUMOYLATION	GO_REGULATION_OF_PROTEIN_SUMOYLATION		21	0.266801	0.814014	0.675097	0.798915	1	3789	tags=29%, list=20%, signal=36%
GO_PHOSPHATIDYLCHOLINE_METABOLIC_PROCESS	GO_PHOSPHATIDYLCHOLINE_METABOLIC_PROCESS		63	0.209473	0.813927	0.773176	0.798571	1	7283	tags=43%, list=39%, signal=70%
GO_POSITIVE_REGULATION_OF_PROTEIN_ACETYLATION	GO_POSITIVE_REGULATION_OF_PROTEIN_ACETYLATION		35	0.226829	0.812662	0.724753	0.800225	1	2859	tags=23%, list=15%, signal=27%
GO_REGULATION_OF_NITRIC_OXIDE_SYNTHASE_ACTIVITY	GO_REGULATION_OF_NITRIC_OXIDE_SYNTHASE_ACTIVITY		47	0.209742	0.810489	0.764587	0.803411	1	3437	tags=23%, list=18%, signal=29%
GO_INOSITOL_PHOSPHATE_METABOLIC_PROCESS	GO_INOSITOL_PHOSPHATE_METABOLIC_PROCESS		56	0.209107	0.810361	0.752896	0.803134	1	4847	tags=29%, list=26%, signal=38%
GO_CYSTEINE_TYPE_ENDOPEPTIDASE_REGULATOR_ACTIVITY_INVOLVED_IN_APOPTOTIC_PROCESS	GO_CYSTEINE_TYPE_ENDOPEPTIDASE_REGULATOR_ACTIVITY_INVOLVED_IN_APOPTOTIC_PROCESS		40	0.215665	0.809597	0.805221	0.803957	1	3561	tags=20%, list=19%, signal=25%
GO_VITAMIN_BINDING	GO_VITAMIN_BINDING		75	0.207815	0.809117	0.774567	0.804281	1	5921	tags=33%, list=32%, signal=49%
GO_REGULATION_OF_LAMELLIPODIUM_ASSEMBLY	GO_REGULATION_OF_LAMELLIPODIUM_ASSEMBLY		25	0.253063	0.806386	0.721248	0.808404	1	3423	tags=24%, list=18%, signal=29%
GO_DICARBOXYLIC_ACID_CATABOLIC_PROCESS	GO_DICARBOXYLIC_ACID_CATABOLIC_PROCESS		16	0.274819	0.806029	0.747968	0.808532	1	4882	tags=38%, list=26%, signal=51%
GO_SMOOTH_ENDOPLASMIC_RETICULUM	GO_SMOOTH_ENDOPLASMIC_RETICULUM		33	0.233032	0.805388	0.741273	0.8091	1	5224	tags=39%, list=28%, signal=55%
GO_NEGATIVE_REGULATION_OF_TRANSCRIPTION_REGULATORY_REGION_DNA_BINDING	GO_NEGATIVE_REGULATION_OF_TRANSCRIPTION_REGULATORY_REGION_DNA_BINDING		17	0.275547	0.804799	0.734406	0.809596	1	7737	tags=65%, list=41%, signal=110%
GO_RESPONSE_TO_ISCHEMIA	GO_RESPONSE_TO_ISCHEMIA		28	0.235633	0.804269	0.723447	0.810026	1	5326	tags=39%, list=28%, signal=55%
GO_COFACTOR_TRANSPORT	GO_COFACTOR_TRANSPORT		26	0.243308	0.803711	0.723562	0.810465	1	6200	tags=46%, list=33%, signal=69%
GO_MAINTENANCE_OF_PROTEIN_LOCALIZATION_IN_ORGANELLE	GO_MAINTENANCE_OF_PROTEIN_LOCALIZATION_IN_ORGANELLE		29	0.239352	0.800062	0.729412	0.816118	1	4732	tags=38%, list=25%, signal=51%
GO_GOLGI_ASSOCIATED_VESICLE	GO_GOLGI_ASSOCIATED_VESICLE		78	0.200946	0.799265	0.746154	0.816967	1	4833	tags=32%, list=26%, signal=43%
GO_PERICENTRIOLAR_MATERIAL	GO_PERICENTRIOLAR_MATERIAL		18	0.290946	0.799108	0.671315	0.816747	1	1870	tags=22%, list=10%, signal=25%
GO_IMMUNE_RESPONSE_REGULATING_CELL_SURFACE_RECEPTOR_SIGNALING_PATHWAY	GO_IMMUNE_RESPONSE_REGULATING_CELL_SURFACE_RECEPTOR_SIGNALING_PATHWAY		286	0.2124	0.798839	0.709234	0.816713	1	5062	tags=33%, list=27%, signal=44%
GO_PHOSPHATIDYLINOSITOL_PHOSPHATE_PHOSPHATASE_ACTIVITY	GO_PHOSPHATIDYLINOSITOL_PHOSPHATE_PHOSPHATASE_ACTIVITY		29	0.253073	0.796026	0.704724	0.82092	1	5218	tags=34%, list=28%, signal=48%
GO_VESICLE_LOCALIZATION	GO_VESICLE_LOCALIZATION		215	0.180738	0.794852	0.795802	0.822399	1	6550	tags=38%, list=35%, signal=57%
GO_NEURONAL_STEM_CELL_POPULATION_MAINTENANCE	GO_NEURONAL_STEM_CELL_POPULATION_MAINTENANCE		19	0.267128	0.794698	0.729293	0.822156	1	1645	tags=16%, list=9%, signal=17%
GO_K63_LINKED_POLYUBIQUITIN_BINDING	GO_K63_LINKED_POLYUBIQUITIN_BINDING		17	0.276577	0.79459	0.688976	0.821845	1	4850	tags=35%, list=26%, signal=48%
GO_GOLGI_TO_PLASMA_MEMBRANE_TRANSPORT	GO_GOLGI_TO_PLASMA_MEMBRANE_TRANSPORT		41	0.22167	0.792004	0.754941	0.825578	1	3695	tags=29%, list=20%, signal=36%
GO_LATE_ENDOSOME	GO_LATE_ENDOSOME		200	0.181945	0.791946	0.799235	0.825189	1	5747	tags=34%, list=31%, signal=48%
GO_ALCOHOL_DEHYDROGENASE_NADP_ACTIVITY	GO_ALCOHOL_DEHYDROGENASE_NADP_ACTIVITY		16	0.309125	0.791733	0.698189	0.825036	1	4422	tags=31%, list=24%, signal=41%
GO_CARBOHYDRATE_TRANSPORTER_ACTIVITY	GO_CARBOHYDRATE_TRANSPORTER_ACTIVITY		43	0.227751	0.79173	0.803719	0.824551	1	6094	tags=30%, list=33%, signal=45%
GO_ORGANIC_ACID_BINDING	GO_ORGANIC_ACID_BINDING		199	0.176673	0.791608	0.860236	0.824257	1	2571	tags=16%, list=14%, signal=18%
GO_LYTIC_VACUOLE_MEMBRANE	GO_LYTIC_VACUOLE_MEMBRANE		255	0.188582	0.791173	0.774436	0.824492	1	6992	tags=40%, list=37%, signal=64%
GO_RECEPTOR_SIGNALING_COMPLEX_SCAFFOLD_ACTIVITY	GO_RECEPTOR_SIGNALING_COMPLEX_SCAFFOLD_ACTIVITY		23	0.249067	0.790833	0.754352	0.824565	1	4998	tags=43%, list=27%, signal=59%
GO_POSITIVE_REGULATION_OF_INTERFERON_BETA_PRODUCTION	GO_POSITIVE_REGULATION_OF_INTERFERON_BETA_PRODUCTION		30	0.242372	0.788239	0.709163	0.828279	1	5716	tags=47%, list=31%, signal=67%
GO_GLYCEROLIPID_METABOLIC_PROCESS	GO_GLYCEROLIPID_METABOLIC_PROCESS		343	0.15903	0.787899	0.906489	0.828347	1	6595	tags=36%, list=35%, signal=54%
GO_RNA_POLYMERASE_II_TRANSCRIPTION_FACTOR_BINDING	GO_RNA_POLYMERASE_II_TRANSCRIPTION_FACTOR_BINDING		103	0.182789	0.787514	0.853414	0.828475	1	3554	tags=22%, list=19%, signal=27%
GO_REGULATION_OF_RUFFLE_ASSEMBLY	GO_REGULATION_OF_RUFFLE_ASSEMBLY		20	0.248969	0.786888	0.765286	0.829007	1	1782	tags=20%, list=10%, signal=22%
GO_ENDOSOMAL_PART	GO_ENDOSOMAL_PART		402	0.176156	0.786462	0.795066	0.829209	1	5754	tags=32%, list=31%, signal=45%
GO_VENTRICULAR_SYSTEM_DEVELOPMENT	GO_VENTRICULAR_SYSTEM_DEVELOPMENT		26	0.236202	0.786378	0.785714	0.828865	1	3653	tags=27%, list=20%, signal=33%
GO_MONOSACCHARIDE_BINDING	GO_MONOSACCHARIDE_BINDING		65	0.21019	0.785922	0.787815	0.829074	1	5799	tags=38%, list=31%, signal=56%
GO_NEUTRAL_LIPID_METABOLIC_PROCESS	GO_NEUTRAL_LIPID_METABOLIC_PROCESS		80	0.213374	0.784877	0.791829	0.830188	1	7094	tags=40%, list=38%, signal=64%
GO_REGULATION_OF_TRANSCRIPTION_FROM_RNA_POLYMERASE_II_PROMOTER_IN_RESPONSE_TO_HYPOXIA	GO_REGULATION_OF_TRANSCRIPTION_FROM_RNA_POLYMERASE_II_PROMOTER_IN_RESPONSE_TO_HYPOXIA		30	0.226575	0.784776	0.776536	0.829871	1	6942	tags=47%, list=37%, signal=74%
GO_INTRACILIARY_TRANSPORT_PARTICLE_B	GO_INTRACILIARY_TRANSPORT_PARTICLE_B		18	0.280992	0.784014	0.717742	0.830604	1	7936	tags=56%, list=42%, signal=96%
GO_ERBB_SIGNALING_PATHWAY	GO_ERBB_SIGNALING_PATHWAY		77	0.194822	0.782443	0.794171	0.832646	1	7514	tags=49%, list=40%, signal=82%
GO_ENTRAINMENT_OF_CIRCADIAN_CLOCK_BY_PHOTOPERIOD	GO_ENTRAINMENT_OF_CIRCADIAN_CLOCK_BY_PHOTOPERIOD		18	0.263049	0.782421	0.732314	0.832197	1	2724	tags=22%, list=15%, signal=26%
GO_SPERM_PART	GO_SPERM_PART		126	0.17856	0.781646	0.855731	0.832966	1	4559	tags=23%, list=24%, signal=30%
GO_INTESTINAL_EPITHELIAL_CELL_DIFFERENTIATION	GO_INTESTINAL_EPITHELIAL_CELL_DIFFERENTIATION		16	0.259403	0.779069	0.751012	0.836556	1	726	tags=13%, list=4%, signal=13%
GO_POSITIVE_REGULATION_OF_MICROTUBULE_POLYMERIZATION	GO_POSITIVE_REGULATION_OF_MICROTUBULE_POLYMERIZATION		18	0.25923	0.778794	0.754386	0.836495	1	2272	tags=22%, list=12%, signal=25%
GO_SINGLE_ORGANISM_MEMBRANE_FUSION	GO_SINGLE_ORGANISM_MEMBRANE_FUSION		118	0.1768	0.777556	0.859583	0.838009	1	7044	tags=40%, list=38%, signal=63%
GO_O_GLYCAN_PROCESSING	GO_O_GLYCAN_PROCESSING		54	0.227811	0.777537	0.727984	0.837541	1	6471	tags=43%, list=35%, signal=65%
GO_AUTOPHAGOSOME_ORGANIZATION	GO_AUTOPHAGOSOME_ORGANIZATION		39	0.22363	0.776617	0.725146	0.838501	1	1186	tags=13%, list=6%, signal=14%
GO_REGULATION_OF_HYDROGEN_PEROXIDE_INDUCED_CELL_DEATH	GO_REGULATION_OF_HYDROGEN_PEROXIDE_INDUCED_CELL_DEATH		17	0.273831	0.776459	0.768293	0.838273	1	5195	tags=47%, list=28%, signal=65%
GO_SYNTAXIN_1_BINDING	GO_SYNTAXIN_1_BINDING		18	0.275025	0.775713	0.734531	0.838981	1	4797	tags=33%, list=26%, signal=45%
GO_POSITIVE_REGULATION_OF_I_KAPPAB_KINASE_NF_KAPPAB_SIGNALING	GO_POSITIVE_REGULATION_OF_I_KAPPAB_KINASE_NF_KAPPAB_SIGNALING		176	0.183766	0.772852	0.809524	0.842975	1	5838	tags=36%, list=31%, signal=52%
GO_NEGATIVE_REGULATION_OF_ALCOHOL_BIOSYNTHETIC_PROCESS	GO_NEGATIVE_REGULATION_OF_ALCOHOL_BIOSYNTHETIC_PROCESS		17	0.264805	0.772677	0.782101	0.842771	1	5347	tags=41%, list=29%, signal=58%
GO_RAB_GTPASE_BINDING	GO_RAB_GTPASE_BINDING		113	0.199831	0.770771	0.771825	0.845217	1	6997	tags=42%, list=37%, signal=66%
GO_ALDO_KETO_REDUCTASE_NADP_ACTIVITY	GO_ALDO_KETO_REDUCTASE_NADP_ACTIVITY		25	0.269382	0.77022	0.732943	0.845582	1	4422	tags=28%, list=24%, signal=37%
GO_RESPONSE_TO_EPIDERMAL_GROWTH_FACTOR	GO_RESPONSE_TO_EPIDERMAL_GROWTH_FACTOR		28	0.232118	0.768787	0.792969	0.847386	1	4764	tags=36%, list=25%, signal=48%
GO_MAINTENANCE_OF_LOCATION_IN_CELL	GO_MAINTENANCE_OF_LOCATION_IN_CELL		94	0.186171	0.767978	0.843874	0.848159	1	6283	tags=44%, list=34%, signal=65%
GO_ASPARTIC_TYPE_PEPTIDASE_ACTIVITY	GO_ASPARTIC_TYPE_PEPTIDASE_ACTIVITY		24	0.265066	0.766314	0.800395	0.850256	1	3054	tags=25%, list=16%, signal=30%
GO_INNATE_IMMUNE_RESPONSE_IN_MUCOSA	GO_INNATE_IMMUNE_RESPONSE_IN_MUCOSA		21	0.287452	0.766219	0.728992	0.849921	1	8694	tags=52%, list=46%, signal=98%
GO_BRUSH_BORDER_MEMBRANE	GO_BRUSH_BORDER_MEMBRANE		55	0.211481	0.765826	0.824197	0.850041	1	3327	tags=22%, list=18%, signal=26%
GO_ACTIVE_TRANSMEMBRANE_TRANSPORTER_ACTIVITY	GO_ACTIVE_TRANSMEMBRANE_TRANSPORTER_ACTIVITY		347	0.167054	0.76156	0.934783	0.856051	1	5520	tags=28%, list=30%, signal=39%
GO_REGULATION_OF_GLUCONEOGENESIS	GO_REGULATION_OF_GLUCONEOGENESIS		31	0.219182	0.761202	0.845529	0.856109	1	6790	tags=52%, list=36%, signal=81%
GO_ACROSOMAL_VESICLE	GO_ACROSOMAL_VESICLE		82	0.185434	0.760796	0.865306	0.856236	1	4559	tags=24%, list=24%, signal=32%
GO_REGULATION_OF_RESPONSE_TO_OXIDATIVE_STRESS	GO_REGULATION_OF_RESPONSE_TO_OXIDATIVE_STRESS		58	0.197186	0.758332	0.829787	0.85949	1	3938	tags=24%, list=21%, signal=30%
GO_NEGATIVE_REGULATION_OF_NF_KAPPAB_IMPORT_INTO_NUCLEUS	GO_NEGATIVE_REGULATION_OF_NF_KAPPAB_IMPORT_INTO_NUCLEUS		17	0.256492	0.757915	0.768421	0.859648	1	5075	tags=41%, list=27%, signal=56%
GO_AMIDE_TRANSMEMBRANE_TRANSPORTER_ACTIVITY	GO_AMIDE_TRANSMEMBRANE_TRANSPORTER_ACTIVITY		18	0.25265	0.756729	0.804391	0.8609	1	6049	tags=33%, list=32%, signal=49%
GO_MODIFIED_AMINO_ACID_TRANSMEMBRANE_TRANSPORTER_ACTIVITY	GO_MODIFIED_AMINO_ACID_TRANSMEMBRANE_TRANSPORTER_ACTIVITY		16	0.263694	0.756654	0.794606	0.860509	1	3559	tags=25%, list=19%, signal=31%
GO_AMINE_CATABOLIC_PROCESS	GO_AMINE_CATABOLIC_PROCESS		20	0.242296	0.755877	0.779116	0.861187	1	3809	tags=25%, list=20%, signal=31%
GO_REGULATION_OF_DEFENSE_RESPONSE_TO_VIRUS_BY_VIRUS	GO_REGULATION_OF_DEFENSE_RESPONSE_TO_VIRUS_BY_VIRUS		29	0.253975	0.755149	0.768775	0.8618	1	3142	tags=28%, list=17%, signal=33%
GO_POSITIVE_REGULATION_OF_PROTEIN_DEACETYLATION	GO_POSITIVE_REGULATION_OF_PROTEIN_DEACETYLATION		18	0.256052	0.754775	0.755299	0.86189	1	3045	tags=33%, list=16%, signal=40%
GO_STEROID_DEHYDROGENASE_ACTIVITY	GO_STEROID_DEHYDROGENASE_ACTIVITY		27	0.237413	0.752664	0.795918	0.864517	1	5235	tags=37%, list=28%, signal=51%
GO_TUMOR_NECROSIS_FACTOR_RECEPTOR_BINDING	GO_TUMOR_NECROSIS_FACTOR_RECEPTOR_BINDING		29	0.254556	0.752339	0.754753	0.864502	1	1646	tags=17%, list=9%, signal=19%
GO_VITAMIN_TRANSPORTER_ACTIVITY	GO_VITAMIN_TRANSPORTER_ACTIVITY		21	0.249574	0.75156	0.796364	0.865191	1	2960	tags=19%, list=16%, signal=23%
GO_REGULATION_OF_TOLL_LIKE_RECEPTOR_4_SIGNALING_PATHWAY	GO_REGULATION_OF_TOLL_LIKE_RECEPTOR_4_SIGNALING_PATHWAY		17	0.25576	0.749704	0.759754	0.867411	1	6194	tags=41%, list=33%, signal=61%
GO_POLYOL_TRANSPORT	GO_POLYOL_TRANSPORT		17	0.262174	0.747932	0.822134	0.869465	1	1970	tags=12%, list=11%, signal=13%
GO_TOR_SIGNALING	GO_TOR_SIGNALING		16	0.246975	0.746533	0.785288	0.871048	1	4975	tags=31%, list=27%, signal=43%
GO_IRON_ION_HOMEOSTASIS	GO_IRON_ION_HOMEOSTASIS		64	0.19257	0.745434	0.836935	0.872159	1	5318	tags=33%, list=28%, signal=46%
GO_NEGATIVE_REGULATION_OF_POTASSIUM_ION_TRANSMEMBRANE_TRANSPORTER_ACTIVITY	GO_NEGATIVE_REGULATION_OF_POTASSIUM_ION_TRANSMEMBRANE_TRANSPORTER_ACTIVITY		15	0.260939	0.744475	0.782524	0.873039	1	3177	tags=33%, list=17%, signal=40%
GO_MICROVILLUS_MEMBRANE	GO_MICROVILLUS_MEMBRANE		19	0.249725	0.742412	0.807322	0.8755	1	4365	tags=37%, list=23%, signal=48%
GO_MONOSACCHARIDE_TRANSPORT	GO_MONOSACCHARIDE_TRANSPORT		53	0.1933	0.742256	0.879612	0.875213	1	6094	tags=34%, list=33%, signal=50%
GO_REGULATION_OF_MEIOTIC_NUCLEAR_DIVISION	GO_REGULATION_OF_MEIOTIC_NUCLEAR_DIVISION		28	0.221362	0.74162	0.856287	0.875638	1	970	tags=11%, list=5%, signal=11%
GO_SNARE_BINDING	GO_SNARE_BINDING		121	0.176228	0.739578	0.893536	0.878012	1	7420	tags=45%, list=40%, signal=73%
GO_BICARBONATE_TRANSMEMBRANE_TRANSPORTER_ACTIVITY	GO_BICARBONATE_TRANSMEMBRANE_TRANSPORTER_ACTIVITY		19	0.259936	0.739445	0.796781	0.877698	1	1025	tags=11%, list=5%, signal=11%
GO_VESICLE_ORGANIZATION	GO_VESICLE_ORGANIZATION		265	0.1638	0.73886	0.873823	0.878009	1	6550	tags=40%, list=35%, signal=61%
GO_NEGATIVE_REGULATION_OF_FIBROBLAST_PROLIFERATION	GO_NEGATIVE_REGULATION_OF_FIBROBLAST_PROLIFERATION		27	0.230545	0.738505	0.789144	0.878011	1	6974	tags=56%, list=37%, signal=88%
GO_RECEPTOR_SIGNALING_PROTEIN_SERINE_THREONINE_KINASE_ACTIVITY	GO_RECEPTOR_SIGNALING_PROTEIN_SERINE_THREONINE_KINASE_ACTIVITY		85	0.184138	0.738369	0.870544	0.877709	1	6098	tags=38%, list=33%, signal=56%
GO_AROMATIC_AMINO_ACID_FAMILY_METABOLIC_PROCESS	GO_AROMATIC_AMINO_ACID_FAMILY_METABOLIC_PROCESS		27	0.226427	0.737114	0.840081	0.878941	1	4536	tags=26%, list=24%, signal=34%
GO_LIPASE_INHIBITOR_ACTIVITY	GO_LIPASE_INHIBITOR_ACTIVITY		16	0.319663	0.736969	0.7842	0.878632	1	2945	tags=19%, list=16%, signal=22%
GO_ANTIGEN_PROCESSING_AND_PRESENTATION_OF_ENDOGENOUS_ANTIGEN	GO_ANTIGEN_PROCESSING_AND_PRESENTATION_OF_ENDOGENOUS_ANTIGEN		17	0.290277	0.736755	0.748016	0.878449	1	7196	tags=59%, list=38%, signal=96%
GO_MEMBRANE_DOCKING	GO_MEMBRANE_DOCKING		65	0.190218	0.73431	0.839319	0.881419	1	4761	tags=28%, list=25%, signal=37%
GO_VESICLE_DOCKING	GO_VESICLE_DOCKING		54	0.197326	0.73144	0.84981	0.885013	1	6972	tags=43%, list=37%, signal=68%
GO_REGULATION_OF_IMMUNOGLOBULIN_PRODUCTION	GO_REGULATION_OF_IMMUNOGLOBULIN_PRODUCTION		45	0.211528	0.73143	0.812977	0.884521	1	3631	tags=20%, list=19%, signal=25%
GO_PROTON_TRANSPORTING_V_TYPE_ATPASE_COMPLEX	GO_PROTON_TRANSPORTING_V_TYPE_ATPASE_COMPLEX		23	0.246722	0.731361	0.788	0.884123	1	8754	tags=65%, list=47%, signal=122%
GO_PHOTOPERIODISM	GO_PHOTOPERIODISM		23	0.224691	0.730906	0.834933	0.884277	1	2724	tags=17%, list=15%, signal=20%
GO_PHOSPHOLIPID_CATABOLIC_PROCESS	GO_PHOSPHOLIPID_CATABOLIC_PROCESS		29	0.215565	0.728503	0.865878	0.887085	1	6856	tags=38%, list=37%, signal=60%
GO_POSITIVE_REGULATION_OF_GLYCOPROTEIN_METABOLIC_PROCESS	GO_POSITIVE_REGULATION_OF_GLYCOPROTEIN_METABOLIC_PROCESS		17	0.246807	0.727298	0.827651	0.888258	1	4595	tags=41%, list=25%, signal=55%
GO_NEGATIVE_REGULATION_OF_CARBOHYDRATE_METABOLIC_PROCESS	GO_NEGATIVE_REGULATION_OF_CARBOHYDRATE_METABOLIC_PROCESS		47	0.196291	0.727239	0.875248	0.887832	1	6089	tags=40%, list=33%, signal=60%
GO_PROTEIN_HOMOTRIMERIZATION	GO_PROTEIN_HOMOTRIMERIZATION		19	0.225567	0.726391	0.859471	0.888475	1	6657	tags=42%, list=36%, signal=65%
GO_PHOSPHOLIPID_TRANSPORT	GO_PHOSPHOLIPID_TRANSPORT		54	0.205623	0.725605	0.852273	0.889004	1	2363	tags=17%, list=13%, signal=19%
GO_STEROL_METABOLIC_PROCESS	GO_STEROL_METABOLIC_PROCESS		120	0.184055	0.724787	0.866038	0.889566	1	4274	tags=24%, list=23%, signal=31%
GO_REGULATION_OF_CELLULAR_PH	GO_REGULATION_OF_CELLULAR_PH		73	0.178643	0.723912	0.904669	0.890266	1	3055	tags=18%, list=16%, signal=21%
GO_NEGATIVE_REGULATION_OF_LIPID_METABOLIC_PROCESS	GO_NEGATIVE_REGULATION_OF_LIPID_METABOLIC_PROCESS		75	0.181711	0.723476	0.910134	0.890331	1	6145	tags=37%, list=33%, signal=55%
GO_PROTEIN_DEGLYCOSYLATION	GO_PROTEIN_DEGLYCOSYLATION		21	0.253851	0.722572	0.767925	0.891055	1	7383	tags=52%, list=39%, signal=86%
GO_FATTY_ACID_TRANSPORT	GO_FATTY_ACID_TRANSPORT		55	0.19162	0.720769	0.888247	0.892879	1	4995	tags=31%, list=27%, signal=42%
GO_RESPONSE_TO_XENOBIOTIC_STIMULUS	GO_RESPONSE_TO_XENOBIOTIC_STIMULUS		101	0.188538	0.720491	0.863095	0.892736	1	4829	tags=26%, list=26%, signal=35%
GO_ERYTHROCYTE_DEVELOPMENT	GO_ERYTHROCYTE_DEVELOPMENT		21	0.212296	0.718692	0.89703	0.894546	1	5919	tags=43%, list=32%, signal=63%
GO_AMINO_SUGAR_METABOLIC_PROCESS	GO_AMINO_SUGAR_METABOLIC_PROCESS		39	0.20583	0.714864	0.862986	0.899043	1	2837	tags=18%, list=15%, signal=21%
GO_POSITIVE_REGULATION_OF_RESPONSE_TO_BIOTIC_STIMULUS	GO_POSITIVE_REGULATION_OF_RESPONSE_TO_BIOTIC_STIMULUS		37	0.210596	0.71389	0.846758	0.899822	1	5684	tags=35%, list=30%, signal=50%
GO_PRE_AUTOPHAGOSOMAL_STRUCTURE_MEMBRANE	GO_PRE_AUTOPHAGOSOMAL_STRUCTURE_MEMBRANE		15	0.255645	0.712333	0.812379	0.901318	1	1186	tags=13%, list=6%, signal=14%
GO_CALCIUM_INDEPENDENT_CELL_CELL_ADHESION_VIA_PLASMA_MEMBRANE_CELL_ADHESION_MOLECULES	GO_CALCIUM_INDEPENDENT_CELL_CELL_ADHESION_VIA_PLASMA_MEMBRANE_CELL_ADHESION_MOLECULES		20	0.233642	0.710157	0.887295	0.903545	1	4668	tags=25%, list=25%, signal=33%
GO_PHOSPHATIDYLINOSITOL_3_KINASE_COMPLEX	GO_PHOSPHATIDYLINOSITOL_3_KINASE_COMPLEX		19	0.25387	0.705538	0.783203	0.908796	1	3423	tags=32%, list=18%, signal=39%
GO_EPIDERMAL_GROWTH_FACTOR_RECEPTOR_BINDING	GO_EPIDERMAL_GROWTH_FACTOR_RECEPTOR_BINDING		30	0.21232	0.704937	0.849315	0.90904	1	3970	tags=27%, list=21%, signal=34%
GO_PHAGOSOME_ACIDIFICATION	GO_PHAGOSOME_ACIDIFICATION		26	0.239023	0.704766	0.802	0.908727	1	8754	tags=65%, list=47%, signal=123%
GO_STEREOCILIUM_BUNDLE	GO_STEREOCILIUM_BUNDLE		38	0.197116	0.704519	0.886	0.908547	1	2415	tags=13%, list=13%, signal=15%
GO_HYDROGEN_PEROXIDE_METABOLIC_PROCESS	GO_HYDROGEN_PEROXIDE_METABOLIC_PROCESS		30	0.222613	0.704494	0.850895	0.908062	1	3742	tags=23%, list=20%, signal=29%
GO_REGULATION_OF_RHODOPSIN_MEDIATED_SIGNALING_PATHWAY	GO_REGULATION_OF_RHODOPSIN_MEDIATED_SIGNALING_PATHWAY		28	0.225755	0.7038	0.832323	0.908382	1	3744	tags=18%, list=20%, signal=22%
GO_REGULATION_OF_EPIDERMAL_CELL_DIFFERENTIATION	GO_REGULATION_OF_EPIDERMAL_CELL_DIFFERENTIATION		43	0.201169	0.703686	0.885542	0.908013	1	2528	tags=16%, list=14%, signal=19%
GO_REGULATION_OF_EPIDERMAL_GROWTH_FACTOR_ACTIVATED_RECEPTOR_ACTIVITY	GO_REGULATION_OF_EPIDERMAL_GROWTH_FACTOR_ACTIVATED_RECEPTOR_ACTIVITY		22	0.226674	0.702471	0.846881	0.909043	1	3970	tags=23%, list=21%, signal=29%
GO_AROMATIC_AMINO_ACID_FAMILY_CATABOLIC_PROCESS	GO_AROMATIC_AMINO_ACID_FAMILY_CATABOLIC_PROCESS		19	0.24119	0.702227	0.841176	0.908829	1	9172	tags=68%, list=49%, signal=134%
GO_I_KAPPAB_KINASE_NF_KAPPAB_SIGNALING	GO_I_KAPPAB_KINASE_NF_KAPPAB_SIGNALING		69	0.188249	0.699344	0.847953	0.911771	1	7239	tags=43%, list=39%, signal=71%
GO_MALE_MEIOSIS_I	GO_MALE_MEIOSIS_I		16	0.238061	0.6974	0.845161	0.913625	1	5458	tags=38%, list=29%, signal=53%
GO_POSITIVE_REGULATION_OF_FATTY_ACID_BIOSYNTHETIC_PROCESS	GO_POSITIVE_REGULATION_OF_FATTY_ACID_BIOSYNTHETIC_PROCESS		17	0.244033	0.695652	0.858527	0.915207	1	7014	tags=41%, list=37%, signal=66%
GO_ISOPRENOID_METABOLIC_PROCESS	GO_ISOPRENOID_METABOLIC_PROCESS		122	0.177067	0.694767	0.946869	0.915761	1	4805	tags=23%, list=26%, signal=31%
GO_POSITIVE_REGULATION_OF_INSULIN_SECRETION_INVOLVED_IN_CELLULAR_RESPONSE_TO_GLUCOSE_STIMULUS	GO_POSITIVE_REGULATION_OF_INSULIN_SECRETION_INVOLVED_IN_CELLULAR_RESPONSE_TO_GLUCOSE_STIMULUS		25	0.206684	0.693884	0.909944	0.916274	1	4786	tags=28%, list=26%, signal=38%
GO_NEGATIVE_REGULATION_OF_CELLULAR_RESPONSE_TO_INSULIN_STIMULUS	GO_NEGATIVE_REGULATION_OF_CELLULAR_RESPONSE_TO_INSULIN_STIMULUS		30	0.204364	0.693468	0.879917	0.916277	1	6370	tags=40%, list=34%, signal=61%
GO_REGULATION_OF_FATTY_ACID_TRANSPORT	GO_REGULATION_OF_FATTY_ACID_TRANSPORT		26	0.20141	0.691725	0.886905	0.917773	1	4723	tags=27%, list=25%, signal=36%
GO_RESPONSE_TO_VIRUS	GO_RESPONSE_TO_VIRUS		225	0.176044	0.690117	0.841889	0.919086	1	3259	tags=20%, list=17%, signal=24%
GO_REGULATION_OF_INSULIN_RECEPTOR_SIGNALING_PATHWAY	GO_REGULATION_OF_INSULIN_RECEPTOR_SIGNALING_PATHWAY		40	0.190814	0.686185	0.913481	0.923052	1	6761	tags=40%, list=36%, signal=63%
GO_ACTIVE_ION_TRANSMEMBRANE_TRANSPORTER_ACTIVITY	GO_ACTIVE_ION_TRANSMEMBRANE_TRANSPORTER_ACTIVITY		170	0.160053	0.685202	0.972495	0.923663	1	5439	tags=28%, list=29%, signal=39%
GO_AUDITORY_RECEPTOR_CELL_DIFFERENTIATION	GO_AUDITORY_RECEPTOR_CELL_DIFFERENTIATION		28	0.198264	0.681633	0.900971	0.927082	1	7489	tags=46%, list=40%, signal=77%
GO_ANION_TRANSPORT	GO_ANION_TRANSPORT		487	0.14587	0.679436	0.986513	0.928941	1	4995	tags=23%, list=27%, signal=31%
GO_14_3_3_PROTEIN_BINDING	GO_14_3_3_PROTEIN_BINDING		19	0.225743	0.678887	0.872727	0.929031	1	5194	tags=37%, list=28%, signal=51%
GO_PROTEIN_TRANSPORT_ALONG_MICROTUBULE	GO_PROTEIN_TRANSPORT_ALONG_MICROTUBULE		26	0.220317	0.67871	0.846602	0.928705	1	4614	tags=27%, list=25%, signal=36%
GO_CELLULAR_RESPONSE_TO_CADMIUM_ION	GO_CELLULAR_RESPONSE_TO_CADMIUM_ION		15	0.25688	0.673667	0.822134	0.933651	1	8028	tags=60%, list=43%, signal=105%
GO_CEREBELLAR_PURKINJE_CELL_LAYER_DEVELOPMENT	GO_CEREBELLAR_PURKINJE_CELL_LAYER_DEVELOPMENT		24	0.221983	0.673079	0.896208	0.933746	1	2792	tags=21%, list=15%, signal=24%
GO_MEMBRANE_LIPID_CATABOLIC_PROCESS	GO_MEMBRANE_LIPID_CATABOLIC_PROCESS		22	0.213444	0.672889	0.894	0.933442	1	6823	tags=45%, list=36%, signal=71%
GO_BILE_ACID_AND_BILE_SALT_TRANSPORT	GO_BILE_ACID_AND_BILE_SALT_TRANSPORT		29	0.208222	0.67257	0.917339	0.93326	1	6165	tags=38%, list=33%, signal=56%
GO_SECONDARY_ACTIVE_TRANSMEMBRANE_TRANSPORTER_ACTIVITY	GO_SECONDARY_ACTIVE_TRANSMEMBRANE_TRANSPORTER_ACTIVITY		226	0.156059	0.671962	0.974155	0.933388	1	3624	tags=17%, list=19%, signal=21%
GO_ALCOHOL_CATABOLIC_PROCESS	GO_ALCOHOL_CATABOLIC_PROCESS		57	0.172363	0.67185	0.962891	0.932978	1	5467	tags=26%, list=29%, signal=37%
GO_ENDOCRINE_PANCREAS_DEVELOPMENT	GO_ENDOCRINE_PANCREAS_DEVELOPMENT		40	0.204399	0.671342	0.900609	0.933021	1	2180	tags=15%, list=12%, signal=17%
GO_ORGANIC_ANION_TRANSPORT	GO_ORGANIC_ANION_TRANSPORT		368	0.14669	0.666907	0.996139	0.937102	1	4995	tags=23%, list=27%, signal=31%
GO_PROTEIN_PHOSPHORYLATED_AMINO_ACID_BINDING	GO_PROTEIN_PHOSPHORYLATED_AMINO_ACID_BINDING		24	0.207413	0.666505	0.895954	0.937008	1	5371	tags=33%, list=29%, signal=47%
GO_TRANSCRIPTION_COFACTOR_BINDING	GO_TRANSCRIPTION_COFACTOR_BINDING		24	0.208721	0.666201	0.90495	0.936798	1	5455	tags=38%, list=29%, signal=53%
GO_REGULATION_OF_CILIUM_ASSEMBLY	GO_REGULATION_OF_CILIUM_ASSEMBLY		47	0.179519	0.663864	0.923077	0.938583	1	3565	tags=21%, list=19%, signal=26%
GO_POSITIVE_REGULATION_OF_ERBB_SIGNALING_PATHWAY	GO_POSITIVE_REGULATION_OF_ERBB_SIGNALING_PATHWAY		34	0.190861	0.661499	0.933586	0.940331	1	6678	tags=29%, list=36%, signal=46%
GO_INTRACELLULAR_CALCIUM_ACTIVATED_CHLORIDE_CHANNEL_ACTIVITY	GO_INTRACELLULAR_CALCIUM_ACTIVATED_CHLORIDE_CHANNEL_ACTIVITY		16	0.231351	0.65788	0.915686	0.943374	1	3656	tags=25%, list=20%, signal=31%
GO_LIGAND_DEPENDENT_NUCLEAR_RECEPTOR_BINDING	GO_LIGAND_DEPENDENT_NUCLEAR_RECEPTOR_BINDING		23	0.211964	0.656896	0.909944	0.94379	1	8191	tags=65%, list=44%, signal=116%
GO_REGULATION_OF_POSTTRANSCRIPTIONAL_GENE_SILENCING	GO_REGULATION_OF_POSTTRANSCRIPTIONAL_GENE_SILENCING		19	0.212978	0.655748	0.913534	0.944361	1	2540	tags=21%, list=14%, signal=24%
GO_REGULATION_OF_EPIDERMIS_DEVELOPMENT	GO_REGULATION_OF_EPIDERMIS_DEVELOPMENT		61	0.178471	0.654601	0.947896	0.944951	1	7424	tags=46%, list=40%, signal=76%
GO_SYMPORTER_ACTIVITY	GO_SYMPORTER_ACTIVITY		141	0.157386	0.654189	0.972277	0.944807	1	3624	tags=16%, list=19%, signal=19%
GO_NEGATIVE_REGULATION_OF_VIRAL_GENOME_REPLICATION	GO_NEGATIVE_REGULATION_OF_VIRAL_GENOME_REPLICATION		46	0.210077	0.653145	0.823647	0.945249	1	2049	tags=11%, list=11%, signal=12%
GO_LIPOPROTEIN_PARTICLE_RECEPTOR_BINDING	GO_LIPOPROTEIN_PARTICLE_RECEPTOR_BINDING		22	0.259246	0.653016	0.855769	0.944855	1	5995	tags=32%, list=32%, signal=47%
GO_GLUCOSAMINE_CONTAINING_COMPOUND_METABOLIC_PROCESS	GO_GLUCOSAMINE_CONTAINING_COMPOUND_METABOLIC_PROCESS		25	0.195173	0.651944	0.951362	0.945351	1	2629	tags=16%, list=14%, signal=19%
GO_PHOSPHOLIPASE_A2_ACTIVITY	GO_PHOSPHOLIPASE_A2_ACTIVITY		30	0.188177	0.651009	0.956436	0.945673	1	6920	tags=37%, list=37%, signal=58%
GO_INSULIN_RECEPTOR_SIGNALING_PATHWAY	GO_INSULIN_RECEPTOR_SIGNALING_PATHWAY		77	0.161071	0.649731	0.969925	0.946325	1	3375	tags=17%, list=18%, signal=21%
GO_GRANULOCYTE_ACTIVATION	GO_GRANULOCYTE_ACTIVATION		19	0.22976	0.648069	0.875502	0.947298	1	5925	tags=42%, list=32%, signal=62%
GO_SIGNAL_PEPTIDE_PROCESSING	GO_SIGNAL_PEPTIDE_PROCESSING		22	0.216114	0.647368	0.888672	0.947389	1	7120	tags=41%, list=38%, signal=66%
GO_POSITIVE_REGULATION_OF_IMMUNOGLOBULIN_PRODUCTION	GO_POSITIVE_REGULATION_OF_IMMUNOGLOBULIN_PRODUCTION		29	0.209969	0.647095	0.91	0.947119	1	3631	tags=21%, list=19%, signal=26%
GO_POSITIVE_REGULATION_OF_MONOOXYGENASE_ACTIVITY	GO_POSITIVE_REGULATION_OF_MONOOXYGENASE_ACTIVITY		27	0.196983	0.646396	0.940476	0.947259	1	6494	tags=37%, list=35%, signal=57%
GO_REGULATION_OF_T_CELL_CYTOKINE_PRODUCTION	GO_REGULATION_OF_T_CELL_CYTOKINE_PRODUCTION		19	0.227416	0.646378	0.888446	0.946753	1	520	tags=11%, list=3%, signal=11%
GO_ORGANIC_HYDROXY_COMPOUND_CATABOLIC_PROCESS	GO_ORGANIC_HYDROXY_COMPOUND_CATABOLIC_PROCESS		71	0.164327	0.64528	0.974	0.947211	1	6133	tags=28%, list=33%, signal=42%
GO_ORGANIC_ACID_TRANSMEMBRANE_TRANSPORT	GO_ORGANIC_ACID_TRANSMEMBRANE_TRANSPORT		99	0.164542	0.643883	0.959016	0.947949	1	4995	tags=24%, list=27%, signal=33%
GO_FLAVONOID_METABOLIC_PROCESS	GO_FLAVONOID_METABOLIC_PROCESS		28	0.214443	0.641204	0.916335	0.949782	1	14702	tags=100%, list=79%, signal=466%
GO_MONOCARBOXYLIC_ACID_TRANSPORT	GO_MONOCARBOXYLIC_ACID_TRANSPORT		118	0.158432	0.640251	0.987903	0.950091	1	5673	tags=31%, list=30%, signal=45%
GO_ANION_TRANSMEMBRANE_TRANSPORT	GO_ANION_TRANSMEMBRANE_TRANSPORT		245	0.149184	0.63896	0.983871	0.950688	1	3701	tags=17%, list=20%, signal=21%
GO_ORGANIC_ACID_TRANSPORT	GO_ORGANIC_ACID_TRANSPORT		251	0.145571	0.638309	0.992095	0.950694	1	6165	tags=31%, list=33%, signal=46%
GO_BENZENE_CONTAINING_COMPOUND_METABOLIC_PROCESS	GO_BENZENE_CONTAINING_COMPOUND_METABOLIC_PROCESS		22	0.211819	0.637734	0.946535	0.950684	1	4680	tags=18%, list=25%, signal=24%
GO_MEMBRANE_PROTEIN_INTRACELLULAR_DOMAIN_PROTEOLYSIS	GO_MEMBRANE_PROTEIN_INTRACELLULAR_DOMAIN_PROTEOLYSIS		16	0.221782	0.636738	0.891841	0.950989	1	6193	tags=38%, list=33%, signal=56%
GO_CARBOHYDRATE_TRANSMEMBRANE_TRANSPORT	GO_CARBOHYDRATE_TRANSMEMBRANE_TRANSPORT		24	0.207095	0.635732	0.927273	0.951282	1	2171	tags=13%, list=12%, signal=14%
GO_REGULATION_OF_HYDROGEN_PEROXIDE_METABOLIC_PROCESS	GO_REGULATION_OF_HYDROGEN_PEROXIDE_METABOLIC_PROCESS		15	0.222895	0.63429	0.933464	0.951919	1	6064	tags=33%, list=32%, signal=49%
GO_NATURAL_KILLER_CELL_MEDIATED_IMMUNITY	GO_NATURAL_KILLER_CELL_MEDIATED_IMMUNITY		26	0.203935	0.631978	0.934	0.95325	1	8121	tags=50%, list=43%, signal=88%
GO_PH_REDUCTION	GO_PH_REDUCTION		38	0.192423	0.63165	0.912871	0.952974	1	5629	tags=37%, list=30%, signal=53%
GO_KERATIN_FILAMENT	GO_KERATIN_FILAMENT		63	0.224303	0.63039	0.905622	0.953445	1	9098	tags=46%, list=49%, signal=89%
GO_POSITIVE_REGULATION_OF_SIGNAL_TRANSDUCTION_BY_P53_CLASS_MEDIATOR	GO_POSITIVE_REGULATION_OF_SIGNAL_TRANSDUCTION_BY_P53_CLASS_MEDIATOR		17	0.204017	0.626379	0.946322	0.956059	1	6722	tags=47%, list=36%, signal=73%
GO_STEROID_METABOLIC_PROCESS	GO_STEROID_METABOLIC_PROCESS		231	0.149125	0.625161	0.992337	0.956465	1	6267	tags=32%, list=33%, signal=48%
GO_RESPONSE_TO_VITAMIN_A	GO_RESPONSE_TO_VITAMIN_A		20	0.198528	0.625047	0.948875	0.956033	1	1390	tags=10%, list=7%, signal=11%
GO_BITTER_TASTE_RECEPTOR_ACTIVITY	GO_BITTER_TASTE_RECEPTOR_ACTIVITY		16	0.27299	0.624084	0.79918	0.956228	1	13605	tags=100%, list=73%, signal=366%
GO_REGULATION_OF_PROTEIN_TYROSINE_KINASE_ACTIVITY	GO_REGULATION_OF_PROTEIN_TYROSINE_KINASE_ACTIVITY		59	0.161812	0.622939	0.967213	0.956564	1	3970	tags=22%, list=21%, signal=28%
GO_QUATERNARY_AMMONIUM_GROUP_TRANSPORT	GO_QUATERNARY_AMMONIUM_GROUP_TRANSPORT		18	0.216796	0.620353	0.919679	0.957919	1	4995	tags=33%, list=27%, signal=45%
GO_GLUTATHIONE_DERIVATIVE_METABOLIC_PROCESS	GO_GLUTATHIONE_DERIVATIVE_METABOLIC_PROCESS		21	0.221259	0.619044	0.883399	0.95836	1	5246	tags=38%, list=28%, signal=53%
GO_SKELETAL_MUSCLE_CONTRACTION	GO_SKELETAL_MUSCLE_CONTRACTION		31	0.175999	0.614778	0.966862	0.960835	1	7949	tags=48%, list=42%, signal=84%
GO_PROTEIN_HYDROXYLATION	GO_PROTEIN_HYDROXYLATION		15	0.227215	0.614723	0.912046	0.960354	1	7474	tags=60%, list=40%, signal=100%
GO_ORGANIC_ANION_TRANSMEMBRANE_TRANSPORTER_ACTIVITY	GO_ORGANIC_ANION_TRANSMEMBRANE_TRANSPORTER_ACTIVITY		172	0.143678	0.614051	0.994024	0.960303	1	5200	tags=23%, list=28%, signal=31%
GO_PRE_AUTOPHAGOSOMAL_STRUCTURE	GO_PRE_AUTOPHAGOSOMAL_STRUCTURE		28	0.202126	0.613682	0.903162	0.960023	1	7254	tags=46%, list=39%, signal=76%
GO_ALPHA_TUBULIN_BINDING	GO_ALPHA_TUBULIN_BINDING		23	0.198454	0.611301	0.949416	0.961149	1	5519	tags=35%, list=29%, signal=49%
GO_ENDOCYTIC_VESICLE_LUMEN	GO_ENDOCYTIC_VESICLE_LUMEN		17	0.250284	0.607438	0.899029	0.963249	1	4969	tags=29%, list=27%, signal=40%
GO_REGULATION_OF_CATECHOLAMINE_METABOLIC_PROCESS	GO_REGULATION_OF_CATECHOLAMINE_METABOLIC_PROCESS		16	0.216776	0.606257	0.927536	0.963539	1	3309	tags=19%, list=18%, signal=23%
GO_PRIMARY_LYSOSOME	GO_PRIMARY_LYSOSOME		16	0.255439	0.604262	0.970179	0.96429	1	5747	tags=31%, list=31%, signal=45%
GO_LEUKOCYTE_MEDIATED_CYTOTOXICITY	GO_LEUKOCYTE_MEDIATED_CYTOTOXICITY		35	0.190289	0.604025	0.969262	0.963924	1	4087	tags=20%, list=22%, signal=26%
GO_L_AMINO_ACID_TRANSMEMBRANE_TRANSPORTER_ACTIVITY	GO_L_AMINO_ACID_TRANSMEMBRANE_TRANSPORTER_ACTIVITY		53	0.165022	0.599077	0.983573	0.966483	1	4804	tags=21%, list=26%, signal=28%
GO_EPIDERMAL_GROWTH_FACTOR_RECEPTOR_SIGNALING_PATHWAY	GO_EPIDERMAL_GROWTH_FACTOR_RECEPTOR_SIGNALING_PATHWAY		53	0.165328	0.598991	0.951852	0.966025	1	4115	tags=23%, list=22%, signal=29%
GO_NEUTRAL_AMINO_ACID_TRANSPORT	GO_NEUTRAL_AMINO_ACID_TRANSPORT		33	0.178194	0.597251	0.971944	0.966542	1	8308	tags=52%, list=44%, signal=93%
GO_HYDROGEN_PEROXIDE_CATABOLIC_PROCESS	GO_HYDROGEN_PEROXIDE_CATABOLIC_PROCESS		20	0.20768	0.595828	0.936605	0.966895	1	3561	tags=20%, list=19%, signal=25%
GO_INTERMEDIATE_FILAMENT_CYTOSKELETON	GO_INTERMEDIATE_FILAMENT_CYTOSKELETON		174	0.161838	0.588569	0.981891	0.970614	1	2037	tags=11%, list=11%, signal=12%
GO_REGULATION_OF_ICOSANOID_SECRETION	GO_REGULATION_OF_ICOSANOID_SECRETION		20	0.184689	0.587239	0.974104	0.970824	1	4723	tags=25%, list=25%, signal=33%
GO_POSITIVE_REGULATION_OF_LEUKOCYTE_DEGRANULATION	GO_POSITIVE_REGULATION_OF_LEUKOCYTE_DEGRANULATION		18	0.200254	0.586266	0.938224	0.970827	1	2076	tags=17%, list=11%, signal=19%
GO_CELLULAR_GLUCURONIDATION	GO_CELLULAR_GLUCURONIDATION		22	0.214374	0.585611	0.9389	0.970655	1	14702	tags=100%, list=79%, signal=466%
GO_POSITIVE_REGULATION_OF_LYMPHOCYTE_APOPTOTIC_PROCESS	GO_POSITIVE_REGULATION_OF_LYMPHOCYTE_APOPTOTIC_PROCESS		18	0.210011	0.582939	0.946746	0.971577	1	5307	tags=33%, list=28%, signal=46%
GO_POSITIVE_REGULATION_OF_INTERFERON_ALPHA_PRODUCTION	GO_POSITIVE_REGULATION_OF_INTERFERON_ALPHA_PRODUCTION		16	0.213561	0.581791	0.935922	0.971656	1	5591	tags=38%, list=30%, signal=53%
GO_VITAMIN_TRANSPORT	GO_VITAMIN_TRANSPORT		31	0.189837	0.579031	0.97191	0.972573	1	2960	tags=16%, list=16%, signal=19%
GO_ANION_HOMEOSTASIS	GO_ANION_HOMEOSTASIS		39	0.164539	0.578486	0.975332	0.972335	1	2126	tags=13%, list=11%, signal=14%
GO_VACUOLE_FUSION	GO_VACUOLE_FUSION		22	0.185249	0.575038	0.940727	0.973582	1	5747	tags=36%, list=31%, signal=52%
GO_CILIUM_ORGANIZATION	GO_CILIUM_ORGANIZATION		166	0.14305	0.574801	0.980658	0.973165	1	6313	tags=32%, list=34%, signal=48%
GO_POSITIVE_REGULATION_OF_TISSUE_REMODELING	GO_POSITIVE_REGULATION_OF_TISSUE_REMODELING		24	0.178255	0.568242	0.973737	0.975773	1	7679	tags=54%, list=41%, signal=92%
GO_PIRNA_METABOLIC_PROCESS	GO_PIRNA_METABOLIC_PROCESS		15	0.212761	0.565564	0.9499	0.97648	1	5958	tags=27%, list=32%, signal=39%
GO_UDP_GLYCOSYLTRANSFERASE_ACTIVITY	GO_UDP_GLYCOSYLTRANSFERASE_ACTIVITY		127	0.138374	0.565304	0.994163	0.976065	1	6471	tags=35%, list=35%, signal=53%
GO_VACUOLAR_ACIDIFICATION	GO_VACUOLAR_ACIDIFICATION		15	0.209141	0.56335	0.950207	0.976451	1	1973	tags=20%, list=11%, signal=22%
GO_NEGATIVE_REGULATION_OF_CYTOKINE_BIOSYNTHETIC_PROCESS	GO_NEGATIVE_REGULATION_OF_CYTOKINE_BIOSYNTHETIC_PROCESS		28	0.169295	0.562585	0.981405	0.976279	1	5455	tags=29%, list=29%, signal=40%
GO_CYTOPLASMIC_DYNEIN_COMPLEX	GO_CYTOPLASMIC_DYNEIN_COMPLEX		15	0.202232	0.555896	0.937743	0.978645	1	4742	tags=27%, list=25%, signal=36%
GO_SYNTAXIN_BINDING	GO_SYNTAXIN_BINDING		88	0.140023	0.555069	0.996078	0.978462	1	5747	tags=28%, list=31%, signal=41%
GO_RETINA_HOMEOSTASIS	GO_RETINA_HOMEOSTASIS		62	0.14529	0.550336	0.998028	0.979813	1	2371	tags=11%, list=13%, signal=13%
GO_MODIFIED_AMINO_ACID_TRANSPORT	GO_MODIFIED_AMINO_ACID_TRANSPORT		26	0.170019	0.549757	0.975048	0.979523	1	6059	tags=35%, list=32%, signal=51%
GO_SOLUTE_CATION_SYMPORTER_ACTIVITY	GO_SOLUTE_CATION_SYMPORTER_ACTIVITY		99	0.135603	0.547218	0.998031	0.979987	1	7182	tags=30%, list=38%, signal=49%
GO_RESPONSE_TO_SALT_STRESS	GO_RESPONSE_TO_SALT_STRESS		19	0.179498	0.545263	0.96701	0.980179	1	4896	tags=21%, list=26%, signal=28%
GO_SULFUR_COMPOUND_TRANSMEMBRANE_TRANSPORTER_ACTIVITY	GO_SULFUR_COMPOUND_TRANSMEMBRANE_TRANSPORTER_ACTIVITY		27	0.168398	0.544899	0.98008	0.979778	1	6266	tags=30%, list=33%, signal=44%
GO_POSITIVE_REGULATION_OF_TRIGLYCERIDE_METABOLIC_PROCESS	GO_POSITIVE_REGULATION_OF_TRIGLYCERIDE_METABOLIC_PROCESS		20	0.204422	0.529832	0.967433	0.984558	1	5670	tags=25%, list=30%, signal=36%
GO_RESPONSE_TO_ZINC_ION	GO_RESPONSE_TO_ZINC_ION		55	0.141624	0.514075	1	0.988552	1	7723	tags=44%, list=41%, signal=74%
GO_DYNEIN_COMPLEX	GO_DYNEIN_COMPLEX		42	0.151217	0.504755	0.998016	0.990359	1	8258	tags=48%, list=44%, signal=85%
GO_ACROSOMAL_MEMBRANE	GO_ACROSOMAL_MEMBRANE		20	0.165605	0.50086	0.994059	0.990755	1	15613	tags=100%, list=83%, signal=604%
GO_REGULATION_OF_TRIGLYCERIDE_METABOLIC_PROCESS	GO_REGULATION_OF_TRIGLYCERIDE_METABOLIC_PROCESS		33	0.14624	0.456749	1	0.997717	1	6398	tags=30%, list=34%, signal=46%
GO_NEUTROPHIL_MEDIATED_IMMUNITY	GO_NEUTROPHIL_MEDIATED_IMMUNITY		21	0.166955	0.452208	0.998066	0.997757	1	6393	tags=38%, list=34%, signal=58%
GO_RESPONSE_TO_TYPE_I_INTERFERON	GO_RESPONSE_TO_TYPE_I_INTERFERON		55	0.159037	0.439847	0.954545	0.998468	1	7427	tags=40%, list=40%, signal=66%
GO_AMINO_ACID_TRANSMEMBRANE_TRANSPORT	GO_AMINO_ACID_TRANSMEMBRANE_TRANSPORT		65	0.116664	0.427652	1	0.99895	1	4804	tags=17%, list=26%, signal=23%
GO_PHOTORECEPTOR_CONNECTING_CILIUM	GO_PHOTORECEPTOR_CONNECTING_CILIUM		30	0.131056	0.422702	1	0.998771	1	16260	tags=100%, list=87%, signal=763%
GO_EPIDERMAL_CELL_DIFFERENTIATION	GO_EPIDERMAL_CELL_DIFFERENTIATION		126	0.129309	0.401918	1	0.999482	1	3917	tags=17%, list=21%, signal=21%
GO_BICARBONATE_TRANSPORT	GO_BICARBONATE_TRANSPORT		44	0.108821	0.384008	1	0.999691	1	1025	tags=5%, list=5%, signal=5%
GO_LAMELLAR_BODY	GO_LAMELLAR_BODY		20	0.138747	0.379768	1	0.999286	1	5615	tags=20%, list=30%, signal=29%
GO_INTERFERON_GAMMA_MEDIATED_SIGNALING_PATHWAY	GO_INTERFERON_GAMMA_MEDIATED_SIGNALING_PATHWAY		67	0.117778	0.332027	0.995976	0.999643	1	7605	tags=37%, list=41%, signal=63%

## Sheet: High expression of ARMCX1
NAME	GS<br> follow link to MSigDB	GS DETAILS	SIZE	ES	NES	NOM p-val	FDR q-val	FWER p-val	RANK AT MAX	LEADING EDGE
GO_EXTRACELLULAR_MATRIX	GO_EXTRACELLULAR_MATRIX	Details ...	411	-0.639093	-2.3723	0	0.0017607	0.002	2774	tags=45%, list=15%, signal=52%
GO_PROTEINACEOUS_EXTRACELLULAR_MATRIX	GO_PROTEINACEOUS_EXTRACELLULAR_MATRIX	Details ...	344	-0.64749	-2.34169	0	0.00199295	0.003	2728	tags=46%, list=15%, signal=52%
GO_HEPARIN_BINDING	GO_HEPARIN_BINDING	Details ...	151	-0.617131	-2.27207	0	0.00527427	0.01	2296	tags=40%, list=12%, signal=45%
GO_GLYCOSAMINOGLYCAN_BINDING	GO_GLYCOSAMINOGLYCAN_BINDING	Details ...	194	-0.603359	-2.26581	0	0.0039557	0.01	2774	tags=42%, list=15%, signal=49%
GO_CGMP_METABOLIC_PROCESS	GO_CGMP_METABOLIC_PROCESS	Details ...	23	-0.800969	-2.2469	0	0.00501332	0.016	2064	tags=52%, list=11%, signal=59%
GO_REGULATION_OF_CAMP_METABOLIC_PROCESS	GO_REGULATION_OF_CAMP_METABOLIC_PROCESS	Details ...	126	-0.578139	-2.2359	0	0.00463865	0.017	3706	tags=40%, list=20%, signal=50%
GO_CYCLIC_NUCLEOTIDE_METABOLIC_PROCESS	GO_CYCLIC_NUCLEOTIDE_METABOLIC_PROCESS	Details ...	57	-0.655491	-2.23269	0	0.00426233	0.019	2064	tags=39%, list=11%, signal=43%
GO_PEPTIDE_RECEPTOR_ACTIVITY	GO_PEPTIDE_RECEPTOR_ACTIVITY	Details ...	126	-0.589759	-2.21784	0	0.00522901	0.024	4200	tags=51%, list=22%, signal=65%
GO_GROWTH_FACTOR_BINDING	GO_GROWTH_FACTOR_BINDING	Details ...	122	-0.613346	-2.21516	0	0.00495983	0.027	2677	tags=46%, list=14%, signal=53%
GO_EXTRACELLULAR_MATRIX_COMPONENT	GO_EXTRACELLULAR_MATRIX_COMPONENT	Details ...	122	-0.675874	-2.21246	0	0.00446384	0.027	2704	tags=56%, list=14%, signal=65%
GO_REGULATION_OF_CYCLIC_NUCLEOTIDE_METABOLIC_PROCESS	GO_REGULATION_OF_CYCLIC_NUCLEOTIDE_METABOLIC_PROCESS	Details ...	151	-0.558008	-2.2029	0	0.00465736	0.029	3706	tags=40%, list=20%, signal=49%
GO_SARCOLEMMA	GO_SARCOLEMMA	Details ...	124	-0.599427	-2.18616	0	0.00605208	0.044	2277	tags=44%, list=12%, signal=50%
GO_REGULATION_OF_CYTOSOLIC_CALCIUM_ION_CONCENTRATION	GO_REGULATION_OF_CYTOSOLIC_CALCIUM_ION_CONCENTRATION	Details ...	195	-0.552568	-2.1809	0	0.00609782	0.046	3815	tags=48%, list=20%, signal=60%
GO_REGULATION_OF_AMINE_TRANSPORT	GO_REGULATION_OF_AMINE_TRANSPORT	Details ...	69	-0.617729	-2.1644	0	0.00758109	0.061	4694	tags=59%, list=25%, signal=79%
GO_REGULATION_OF_CELLULAR_RESPONSE_TO_GROWTH_FACTOR_STIMULUS	GO_REGULATION_OF_CELLULAR_RESPONSE_TO_GROWTH_FACTOR_STIMULUS	Details ...	223	-0.516042	-2.16358	0	0.00720651	0.062	2677	tags=33%, list=14%, signal=38%
GO_EXTRACELLULAR_MATRIX_STRUCTURAL_CONSTITUENT	GO_EXTRACELLULAR_MATRIX_STRUCTURAL_CONSTITUENT	Details ...	73	-0.672002	-2.16221	0	0.00689555	0.062	2337	tags=48%, list=12%, signal=55%
GO_REGULATION_OF_ADENYLATE_CYCLASE_ACTIVITY	GO_REGULATION_OF_ADENYLATE_CYCLASE_ACTIVITY	Details ...	68	-0.595221	-2.15514	0	0.00697934	0.066	2528	tags=34%, list=14%, signal=39%
GO_CORECEPTOR_ACTIVITY	GO_CORECEPTOR_ACTIVITY	Details ...	35	-0.730156	-2.15243	0	0.00697876	0.071	3190	tags=60%, list=17%, signal=72%
GO_POSITIVE_REGULATION_OF_OSSIFICATION	GO_POSITIVE_REGULATION_OF_OSSIFICATION	Details ...	81	-0.599574	-2.14775	0	0.00696045	0.076	2470	tags=40%, list=13%, signal=45%
GO_NEGATIVE_REGULATION_OF_CYCLIC_NUCLEOTIDE_METABOLIC_PROCESS	GO_NEGATIVE_REGULATION_OF_CYCLIC_NUCLEOTIDE_METABOLIC_PROCESS	Details ...	41	-0.629043	-2.14227	0	0.0069892	0.08	3650	tags=41%, list=20%, signal=51%
GO_REGULATION_OF_POSTSYNAPTIC_MEMBRANE_POTENTIAL	GO_REGULATION_OF_POSTSYNAPTIC_MEMBRANE_POTENTIAL	Details ...	54	-0.667776	-2.1385	0	0.00735744	0.086	2548	tags=41%, list=14%, signal=47%
GO_INTEGRIN_BINDING	GO_INTEGRIN_BINDING	Details ...	101	-0.611513	-2.13802	0	0.00702301	0.086	2375	tags=48%, list=13%, signal=54%
GO_PLATELET_ALPHA_GRANULE	GO_PLATELET_ALPHA_GRANULE	Details ...	74	-0.647079	-2.13667	0	0.00675093	0.087	2548	tags=45%, list=14%, signal=51%
GO_BASEMENT_MEMBRANE	GO_BASEMENT_MEMBRANE	Details ...	90	-0.649283	-2.13651	0	0.00646964	0.087	2704	tags=53%, list=14%, signal=62%
GO_COLLAGEN_BINDING	GO_COLLAGEN_BINDING	Details ...	60	-0.684021	-2.13474	0	0.00640808	0.09	2300	tags=47%, list=12%, signal=53%
GO_REGULATION_OF_BIOMINERAL_TISSUE_DEVELOPMENT	GO_REGULATION_OF_BIOMINERAL_TISSUE_DEVELOPMENT	Details ...	71	-0.573985	-2.12458	0	0.00719324	0.1	2470	tags=35%, list=13%, signal=40%
GO_COLLAGEN_TRIMER	GO_COLLAGEN_TRIMER	Details ...	86	-0.669487	-2.11446	0	0.00872767	0.115	3933	tags=63%, list=21%, signal=79%
GO_DIGESTIVE_TRACT_MORPHOGENESIS	GO_DIGESTIVE_TRACT_MORPHOGENESIS	Details ...	47	-0.60792	-2.11284	0	0.0085659	0.117	1351	tags=32%, list=7%, signal=34%
GO_CARTILAGE_DEVELOPMENT	GO_CARTILAGE_DEVELOPMENT	Details ...	143	-0.543987	-2.11267	0.00201207	0.00827052	0.117	2744	tags=37%, list=15%, signal=43%
GO_MUSCLE_SYSTEM_PROCESS	GO_MUSCLE_SYSTEM_PROCESS	Details ...	277	-0.514841	-2.11214	0.00410678	0.00812892	0.119	3033	tags=40%, list=16%, signal=47%
GO_MUSCLE_CONTRACTION	GO_MUSCLE_CONTRACTION	Details ...	228	-0.526437	-2.11069	0.00206186	0.00805467	0.123	2888	tags=39%, list=15%, signal=46%
GO_CYTOKINE_BINDING	GO_CYTOKINE_BINDING	Details ...	88	-0.61853	-2.10612	0	0.008363	0.131	2619	tags=44%, list=14%, signal=51%
GO_NEGATIVE_REGULATION_OF_BMP_SIGNALING_PATHWAY	GO_NEGATIVE_REGULATION_OF_BMP_SIGNALING_PATHWAY	Details ...	42	-0.641909	-2.09853	0	0.00916675	0.142	2310	tags=40%, list=12%, signal=46%
GO_REGULATION_OF_OSSIFICATION	GO_REGULATION_OF_OSSIFICATION	Details ...	170	-0.531534	-2.09226	0	0.00965022	0.153	3541	tags=42%, list=19%, signal=52%
GO_REGULATION_OF_BMP_SIGNALING_PATHWAY	GO_REGULATION_OF_BMP_SIGNALING_PATHWAY	Details ...	75	-0.565351	-2.09154	0	0.00951881	0.156	2310	tags=35%, list=12%, signal=39%
GO_EXTRACELLULAR_STRUCTURE_ORGANIZATION	GO_EXTRACELLULAR_STRUCTURE_ORGANIZATION	Details ...	295	-0.572334	-2.09145	0	0.0092544	0.156	2375	tags=41%, list=13%, signal=46%
GO_SMOOTH_MUSCLE_CONTRACTION	GO_SMOOTH_MUSCLE_CONTRACTION	Details ...	45	-0.659254	-2.08644	0	0.00972334	0.164	3377	tags=53%, list=18%, signal=65%
GO_NEURON_RECOGNITION	GO_NEURON_RECOGNITION	Details ...	33	-0.672207	-2.08643	0	0.00946747	0.164	2367	tags=52%, list=13%, signal=59%
GO_POSITIVE_REGULATION_OF_CYCLIC_NUCLEOTIDE_METABOLIC_PROCESS	GO_POSITIVE_REGULATION_OF_CYCLIC_NUCLEOTIDE_METABOLIC_PROCESS	Details ...	106	-0.549025	-2.08402	0	0.00941511	0.167	3816	tags=41%, list=20%, signal=51%
GO_CYCLIC_NUCLEOTIDE_PHOSPHODIESTERASE_ACTIVITY	GO_CYCLIC_NUCLEOTIDE_PHOSPHODIESTERASE_ACTIVITY	Details ...	25	-0.685654	-2.08229	0	0.00931861	0.169	3033	tags=52%, list=16%, signal=62%
GO_REGULATION_OF_PHOSPHOLIPASE_ACTIVITY	GO_REGULATION_OF_PHOSPHOLIPASE_ACTIVITY	Details ...	64	-0.598609	-2.08209	0	0.00909132	0.169	3770	tags=55%, list=20%, signal=68%
GO_PHOSPHOLIPASE_C_ACTIVATING_G_PROTEIN_COUPLED_RECEPTOR_SIGNALING_PATHWAY	GO_PHOSPHOLIPASE_C_ACTIVATING_G_PROTEIN_COUPLED_RECEPTOR_SIGNALING_PATHWAY	Details ...	81	-0.560769	-2.08177	0	0.00887486	0.169	4127	tags=46%, list=22%, signal=58%
GO_CELL_ADHESION_MOLECULE_BINDING	GO_CELL_ADHESION_MOLECULE_BINDING	Details ...	176	-0.533448	-2.08082	0	0.00887652	0.17	2719	tags=44%, list=15%, signal=51%
GO_MEMBRANE_DEPOLARIZATION_DURING_ACTION_POTENTIAL	GO_MEMBRANE_DEPOLARIZATION_DURING_ACTION_POTENTIAL	Details ...	39	-0.679828	-2.07702	0	0.00917847	0.178	2225	tags=36%, list=12%, signal=41%
GO_REGULATION_OF_BLOOD_CIRCULATION	GO_REGULATION_OF_BLOOD_CIRCULATION	Details ...	285	-0.48809	-2.07346	0	0.00937103	0.189	3394	tags=39%, list=18%, signal=46%
GO_GLOMERULUS_DEVELOPMENT	GO_GLOMERULUS_DEVELOPMENT	Details ...	49	-0.646224	-2.07013	0	0.00993057	0.2	3188	tags=51%, list=17%, signal=61%
GO_REGULATION_OF_SYSTEM_PROCESS	GO_REGULATION_OF_SYSTEM_PROCESS	Details ...	490	-0.475062	-2.06939	0	0.00981673	0.201	3394	tags=36%, list=18%, signal=43%
GO_PLATELET_DEGRANULATION	GO_PLATELET_DEGRANULATION	Details ...	103	-0.587431	-2.06873	0	0.00973355	0.203	2497	tags=36%, list=13%, signal=41%
GO_CIRCULATORY_SYSTEM_PROCESS	GO_CIRCULATORY_SYSTEM_PROCESS	Details ...	354	-0.471319	-2.0684	0	0.0095738	0.204	2957	tags=33%, list=16%, signal=39%
GO_CYCLIC_NUCLEOTIDE_BIOSYNTHETIC_PROCESS	GO_CYCLIC_NUCLEOTIDE_BIOSYNTHETIC_PROCESS	Details ...	34	-0.650529	-2.06385	0	0.0100426	0.214	2064	tags=38%, list=11%, signal=43%
GO_CYCLASE_ACTIVITY	GO_CYCLASE_ACTIVITY	Details ...	20	-0.741714	-2.06021	0	0.0105468	0.226	1482	tags=45%, list=8%, signal=49%
GO_CGMP_BIOSYNTHETIC_PROCESS	GO_CGMP_BIOSYNTHETIC_PROCESS	Details ...	15	-0.778034	-2.05986	0	0.010344	0.226	2064	tags=47%, list=11%, signal=52%
GO_POSITIVE_REGULATION_OF_NUCLEOTIDE_METABOLIC_PROCESS	GO_POSITIVE_REGULATION_OF_NUCLEOTIDE_METABOLIC_PROCESS	Details ...	128	-0.522988	-2.05894	0	0.0102085	0.226	3706	tags=39%, list=20%, signal=48%
GO_NEGATIVE_REGULATION_OF_CELLULAR_RESPONSE_TO_GROWTH_FACTOR_STIMULUS	GO_NEGATIVE_REGULATION_OF_CELLULAR_RESPONSE_TO_GROWTH_FACTOR_STIMULUS	Details ...	119	-0.5151	-2.05813	0	0.0101364	0.227	2571	tags=32%, list=14%, signal=37%
GO_NEPHRON_DEVELOPMENT	GO_NEPHRON_DEVELOPMENT	Details ...	115	-0.549272	-2.0574	0.00204499	0.0100258	0.227	3188	tags=39%, list=17%, signal=47%
GO_TRANSMEMBRANE_RECEPTOR_PROTEIN_KINASE_ACTIVITY	GO_TRANSMEMBRANE_RECEPTOR_PROTEIN_KINASE_ACTIVITY	Details ...	81	-0.570518	-2.05594	0	0.00998931	0.229	2677	tags=49%, list=14%, signal=57%
GO_POSITIVE_REGULATION_OF_CAMP_METABOLIC_PROCESS	GO_POSITIVE_REGULATION_OF_CAMP_METABOLIC_PROCESS	Details ...	86	-0.55744	-2.05457	0	0.010059	0.233	3706	tags=40%, list=20%, signal=49%
GO_PLATELET_ALPHA_GRANULE_LUMEN	GO_PLATELET_ALPHA_GRANULE_LUMEN	Details ...	54	-0.667755	-2.05334	0	0.0100664	0.238	2497	tags=44%, list=13%, signal=51%
GO_POSITIVE_REGULATION_OF_OSTEOBLAST_DIFFERENTIATION	GO_POSITIVE_REGULATION_OF_OSTEOBLAST_DIFFERENTIATION	Details ...	57	-0.59219	-2.05229	0	0.0101143	0.241	1967	tags=33%, list=11%, signal=37%
GO_POSITIVE_REGULATION_OF_SYNAPSE_ASSEMBLY	GO_POSITIVE_REGULATION_OF_SYNAPSE_ASSEMBLY	Details ...	55	-0.606584	-2.0518	0	0.0100332	0.241	3711	tags=58%, list=20%, signal=72%
GO_REGULATION_OF_ION_HOMEOSTASIS	GO_REGULATION_OF_ION_HOMEOSTASIS	Details ...	193	-0.482988	-2.05024	0	0.0100889	0.242	3221	tags=35%, list=17%, signal=42%
GO_ENSHEATHMENT_OF_NEURONS	GO_ENSHEATHMENT_OF_NEURONS	Details ...	87	-0.519354	-2.04792	0	0.0101735	0.246	2475	tags=32%, list=13%, signal=37%
GO_POSITIVE_REGULATION_OF_BIOMINERAL_TISSUE_DEVELOPMENT	GO_POSITIVE_REGULATION_OF_BIOMINERAL_TISSUE_DEVELOPMENT	Details ...	37	-0.62262	-2.04655	0	0.0101828	0.25	2143	tags=38%, list=11%, signal=43%
GO_CONNECTIVE_TISSUE_DEVELOPMENT	GO_CONNECTIVE_TISSUE_DEVELOPMENT	Details ...	188	-0.51984	-2.04173	0.00208333	0.0110683	0.274	2744	tags=37%, list=15%, signal=43%
GO_REGULATION_OF_PHOSPHOLIPASE_C_ACTIVITY	GO_REGULATION_OF_PHOSPHOLIPASE_C_ACTIVITY	Details ...	39	-0.676683	-2.03552	0	0.0120252	0.293	4357	tags=74%, list=23%, signal=97%
GO_MUSCLE_ORGAN_DEVELOPMENT	GO_MUSCLE_ORGAN_DEVELOPMENT	Details ...	259	-0.485676	-2.03325	0	0.0123365	0.301	3304	tags=36%, list=18%, signal=43%
GO_REGULATION_OF_RELEASE_OF_SEQUESTERED_CALCIUM_ION_INTO_CYTOSOL	GO_REGULATION_OF_RELEASE_OF_SEQUESTERED_CALCIUM_ION_INTO_CYTOSOL	Details ...	71	-0.567269	-2.0315	0.00626305	0.0123744	0.305	3081	tags=42%, list=16%, signal=50%
GO_REGULATION_OF_CATECHOLAMINE_SECRETION	GO_REGULATION_OF_CATECHOLAMINE_SECRETION	Details ...	41	-0.651938	-2.03136	0.00204918	0.0121924	0.305	4371	tags=61%, list=23%, signal=79%
GO_SECRETORY_GRANULE_LUMEN	GO_SECRETORY_GRANULE_LUMEN	Details ...	80	-0.619005	-2.02831	0.002079	0.0125775	0.316	3258	tags=41%, list=17%, signal=50%
GO_REGULATION_OF_TRANSMEMBRANE_RECEPTOR_PROTEIN_SERINE_THREONINE_KINASE_SIGNALING_PATHWAY	GO_REGULATION_OF_TRANSMEMBRANE_RECEPTOR_PROTEIN_SERINE_THREONINE_KINASE_SIGNALING_PATHWAY	Details ...	200	-0.471675	-2.02786	0	0.0125758	0.32	2462	tags=29%, list=13%, signal=32%
GO_NEGATIVE_REGULATION_OF_VASCULATURE_DEVELOPMENT	GO_NEGATIVE_REGULATION_OF_VASCULATURE_DEVELOPMENT	Details ...	74	-0.580506	-2.02758	0	0.012441	0.321	3205	tags=41%, list=17%, signal=49%
GO_REGULATION_OF_SYNAPTIC_TRANSMISSION_GABAERGIC	GO_REGULATION_OF_SYNAPTIC_TRANSMISSION_GABAERGIC	Details ...	28	-0.625603	-2.02678	0	0.0123725	0.321	3752	tags=57%, list=20%, signal=71%
GO_RESPONSE_TO_BMP	GO_RESPONSE_TO_BMP	Details ...	88	-0.540586	-2.02496	0	0.0125847	0.327	3828	tags=47%, list=20%, signal=58%
GO_SULFUR_COMPOUND_CATABOLIC_PROCESS	GO_SULFUR_COMPOUND_CATABOLIC_PROCESS	Details ...	39	-0.600474	-2.02496	0.00201207	0.0124146	0.327	1087	tags=28%, list=6%, signal=30%
GO_POSITIVE_REGULATION_OF_VASCULATURE_DEVELOPMENT	GO_POSITIVE_REGULATION_OF_VASCULATURE_DEVELOPMENT	Details ...	129	-0.534516	-2.02384	0	0.012404	0.33	2783	tags=36%, list=15%, signal=43%
GO_REGULATION_OF_HEART_CONTRACTION	GO_REGULATION_OF_HEART_CONTRACTION	Details ...	216	-0.493052	-2.02349	0	0.0123086	0.331	3360	tags=40%, list=18%, signal=49%
GO_REGULATION_OF_CALCIUM_ION_TRANSPORT	GO_REGULATION_OF_CALCIUM_ION_TRANSPORT	Details ...	199	-0.487952	-2.02129	0	0.0125513	0.337	3225	tags=37%, list=17%, signal=44%
GO_KIDNEY_EPITHELIUM_DEVELOPMENT	GO_KIDNEY_EPITHELIUM_DEVELOPMENT	Details ...	125	-0.517273	-2.0212	0	0.0124046	0.337	2476	tags=32%, list=13%, signal=37%
GO_REGULATION_OF_LYASE_ACTIVITY	GO_REGULATION_OF_LYASE_ACTIVITY	Details ...	83	-0.526527	-2.02066	0	0.0123182	0.339	2528	tags=30%, list=14%, signal=35%
GO_CELL_SUBSTRATE_ADHESION	GO_CELL_SUBSTRATE_ADHESION	Details ...	161	-0.516068	-2.018	0	0.0126675	0.348	2786	tags=42%, list=15%, signal=49%
GO_MELANOCYTE_DIFFERENTIATION	GO_MELANOCYTE_DIFFERENTIATION	Details ...	17	-0.678633	-2.01703	0	0.0126905	0.35	1299	tags=47%, list=7%, signal=51%
GO_REGULATION_OF_SEQUESTERING_OF_CALCIUM_ION	GO_REGULATION_OF_SEQUESTERING_OF_CALCIUM_ION	Details ...	102	-0.539924	-2.01688	0	0.0125357	0.35	3104	tags=40%, list=17%, signal=48%
GO_NEGATIVE_REGULATION_OF_AMINE_TRANSPORT	GO_NEGATIVE_REGULATION_OF_AMINE_TRANSPORT	Details ...	25	-0.668347	-2.01594	0.00204082	0.012528	0.351	4694	tags=60%, list=25%, signal=80%
GO_NEGATIVE_REGULATION_OF_TRANSMEMBRANE_RECEPTOR_PROTEIN_SERINE_THREONINE_KINASE_SIGNALING_PATHWAY	GO_NEGATIVE_REGULATION_OF_TRANSMEMBRANE_RECEPTOR_PROTEIN_SERINE_THREONINE_KINASE_SIGNALING_PATHWAY	Details ...	101	-0.51335	-2.0146	0	0.0125923	0.356	2657	tags=31%, list=14%, signal=36%
GO_REGULATION_OF_VASCULATURE_DEVELOPMENT	GO_REGULATION_OF_VASCULATURE_DEVELOPMENT	Details ...	223	-0.508664	-2.01402	0	0.0125837	0.359	3205	tags=37%, list=17%, signal=44%
GO_REGULATION_OF_SYNAPTIC_TRANSMISSION_GLUTAMATERGIC	GO_REGULATION_OF_SYNAPTIC_TRANSMISSION_GLUTAMATERGIC	Details ...	49	-0.62076	-2.01034	0	0.0130977	0.366	2217	tags=41%, list=12%, signal=46%
GO_MESENCHYME_DEVELOPMENT	GO_MESENCHYME_DEVELOPMENT	Details ...	183	-0.513319	-2.00984	0	0.0130911	0.369	3109	tags=38%, list=17%, signal=45%
GO_G_PROTEIN_COUPLED_RECEPTOR_SIGNALING_PATHWAY_COUPLED_TO_CYCLIC_NUCLEOTIDE_SECOND_MESSENGER	GO_G_PROTEIN_COUPLED_RECEPTOR_SIGNALING_PATHWAY_COUPLED_TO_CYCLIC_NUCLEOTIDE_SECOND_MESSENGER	Details ...	161	-0.540685	-2.00647	0	0.0134721	0.381	4435	tags=46%, list=24%, signal=60%
GO_WNT_PROTEIN_BINDING	GO_WNT_PROTEIN_BINDING	Details ...	29	-0.661668	-2.00482	0	0.0136874	0.388	2060	tags=45%, list=11%, signal=50%
GO_FIBRONECTIN_BINDING	GO_FIBRONECTIN_BINDING	Details ...	26	-0.710911	-2.00213	0	0.0143061	0.399	2289	tags=58%, list=12%, signal=66%
GO_ADENYLATE_CYCLASE_MODULATING_G_PROTEIN_COUPLED_RECEPTOR_SIGNALING_PATHWAY	GO_ADENYLATE_CYCLASE_MODULATING_G_PROTEIN_COUPLED_RECEPTOR_SIGNALING_PATHWAY	Details ...	135	-0.551465	-2.00153	0	0.014208	0.4	3752	tags=41%, list=20%, signal=51%
GO_SECOND_MESSENGER_MEDIATED_SIGNALING	GO_SECOND_MESSENGER_MEDIATED_SIGNALING	Details ...	153	-0.507351	-2.00145	0	0.014078	0.401	3770	tags=46%, list=20%, signal=57%
GO_SENSORY_PERCEPTION_OF_PAIN	GO_SENSORY_PERCEPTION_OF_PAIN	Details ...	72	-0.550662	-2.00098	0	0.0140491	0.402	4043	tags=50%, list=22%, signal=64%
GO_REGULATION_OF_CALCIUM_ION_TRANSPORT_INTO_CYTOSOL	GO_REGULATION_OF_CALCIUM_ION_TRANSPORT_INTO_CYTOSOL	Details ...	88	-0.551186	-2.00095	0	0.0139086	0.402	3718	tags=45%, list=20%, signal=56%
GO_DERMATAN_SULFATE_PROTEOGLYCAN_METABOLIC_PROCESS	GO_DERMATAN_SULFATE_PROTEOGLYCAN_METABOLIC_PROCESS	Details ...	16	-0.750772	-2.00092	0	0.0137622	0.402	2347	tags=63%, list=13%, signal=71%
GO_VASCULAR_PROCESS_IN_CIRCULATORY_SYSTEM	GO_VASCULAR_PROCESS_IN_CIRCULATORY_SYSTEM	Details ...	158	-0.493504	-2.00092	0	0.0136285	0.402	3394	tags=36%, list=18%, signal=44%
GO_REGULATION_OF_CARTILAGE_DEVELOPMENT	GO_REGULATION_OF_CARTILAGE_DEVELOPMENT	Details ...	56	-0.604482	-2.0007	0.00408163	0.0135183	0.403	2103	tags=45%, list=11%, signal=50%
GO_CHONDROCYTE_DIFFERENTIATION	GO_CHONDROCYTE_DIFFERENTIATION	Details ...	59	-0.577603	-1.99983	0	0.0135536	0.406	2714	tags=41%, list=15%, signal=47%
GO_REGULATION_OF_CATION_CHANNEL_ACTIVITY	GO_REGULATION_OF_CATION_CHANNEL_ACTIVITY	Details ...	83	-0.502551	-1.99982	0.00207469	0.0134167	0.406	2041	tags=31%, list=11%, signal=35%
GO_MUSCLE_STRUCTURE_DEVELOPMENT	GO_MUSCLE_STRUCTURE_DEVELOPMENT	Details ...	411	-0.462815	-1.99841	0	0.0135431	0.413	2722	tags=32%, list=15%, signal=36%
GO_REGULATION_OF_PATHWAY_RESTRICTED_SMAD_PROTEIN_PHOSPHORYLATION	GO_REGULATION_OF_PATHWAY_RESTRICTED_SMAD_PROTEIN_PHOSPHORYLATION	Details ...	55	-0.551795	-1.99406	0.00203252	0.0142775	0.424	2462	tags=38%, list=13%, signal=44%
GO_CELL_MATRIX_ADHESION	GO_CELL_MATRIX_ADHESION	Details ...	116	-0.522662	-1.99387	0	0.0141581	0.424	2744	tags=41%, list=15%, signal=48%
GO_REGULATION_OF_CHONDROCYTE_DIFFERENTIATION	GO_REGULATION_OF_CHONDROCYTE_DIFFERENTIATION	Details ...	42	-0.613692	-1.99384	0.0020284	0.0140207	0.424	2446	tags=48%, list=13%, signal=55%
GO_LUNG_ALVEOLUS_DEVELOPMENT	GO_LUNG_ALVEOLUS_DEVELOPMENT	Details ...	40	-0.59162	-1.99312	0	0.0140557	0.428	1305	tags=28%, list=7%, signal=29%
GO_BLOOD_VESSEL_MORPHOGENESIS	GO_BLOOD_VESSEL_MORPHOGENESIS	Details ...	355	-0.491575	-1.99083	0	0.0143123	0.432	2847	tags=37%, list=15%, signal=42%
GO_POSITIVE_REGULATION_OF_PHOSPHATIDYLINOSITOL_3_KINASE_SIGNALING	GO_POSITIVE_REGULATION_OF_PHOSPHATIDYLINOSITOL_3_KINASE_SIGNALING	Details ...	59	-0.552109	-1.99005	0	0.0143703	0.432	3125	tags=42%, list=17%, signal=51%
GO_I_BAND	GO_I_BAND	Details ...	118	-0.565837	-1.98889	0.00793651	0.0144571	0.437	3606	tags=51%, list=19%, signal=63%
GO_REGULATION_OF_NUCLEOTIDE_METABOLIC_PROCESS	GO_REGULATION_OF_NUCLEOTIDE_METABOLIC_PROCESS	Details ...	202	-0.463822	-1.9875	0	0.0145779	0.443	3706	tags=36%, list=20%, signal=44%
GO_PROTEOGLYCAN_BIOSYNTHETIC_PROCESS	GO_PROTEOGLYCAN_BIOSYNTHETIC_PROCESS	Details ...	57	-0.577801	-1.98481	0.00208768	0.0148631	0.447	3737	tags=53%, list=20%, signal=66%
GO_REGULATION_OF_SYNAPSE_ASSEMBLY	GO_REGULATION_OF_SYNAPSE_ASSEMBLY	Details ...	72	-0.560501	-1.98414	0	0.0149322	0.449	3711	tags=54%, list=20%, signal=67%
GO_NEGATIVE_REGULATION_OF_CALCIUM_ION_TRANSMEMBRANE_TRANSPORT	GO_NEGATIVE_REGULATION_OF_CALCIUM_ION_TRANSMEMBRANE_TRANSPORT	Details ...	28	-0.607202	-1.98224	0	0.0151113	0.452	1623	tags=32%, list=9%, signal=35%
GO_NEGATIVE_REGULATION_OF_LOCOMOTION	GO_NEGATIVE_REGULATION_OF_LOCOMOTION	Details ...	249	-0.471316	-1.98039	0	0.0153659	0.456	2443	tags=31%, list=13%, signal=36%
GO_REGULATION_OF_METAL_ION_TRANSPORT	GO_REGULATION_OF_METAL_ION_TRANSPORT	Details ...	312	-0.449389	-1.97975	0	0.0154153	0.46	3770	tags=38%, list=20%, signal=47%
GO_REGULATION_OF_SMOOTH_MUSCLE_CONTRACTION	GO_REGULATION_OF_SMOOTH_MUSCLE_CONTRACTION	Details ...	59	-0.57822	-1.97537	0.00196464	0.0162238	0.475	4043	tags=51%, list=22%, signal=65%
GO_NEGATIVE_REGULATION_OF_CALCIUM_ION_TRANSPORT	GO_NEGATIVE_REGULATION_OF_CALCIUM_ION_TRANSPORT	Details ...	48	-0.535249	-1.97522	0	0.0161205	0.475	3192	tags=40%, list=17%, signal=48%
GO_POSITIVE_REGULATION_OF_PHOSPHOLIPASE_ACTIVITY	GO_POSITIVE_REGULATION_OF_PHOSPHOLIPASE_ACTIVITY	Details ...	53	-0.589972	-1.97405	0	0.0162181	0.478	3770	tags=55%, list=20%, signal=68%
GO_REGULATION_OF_CALCIUM_ION_IMPORT	GO_REGULATION_OF_CALCIUM_ION_IMPORT	Details ...	97	-0.499506	-1.974	0.00205761	0.0160795	0.478	3718	tags=43%, list=20%, signal=54%
GO_EMBRYONIC_DIGESTIVE_TRACT_DEVELOPMENT	GO_EMBRYONIC_DIGESTIVE_TRACT_DEVELOPMENT	Details ...	32	-0.622658	-1.974	0	0.0159574	0.478	2082	tags=38%, list=11%, signal=42%
GO_CYCLIC_NUCLEOTIDE_CATABOLIC_PROCESS	GO_CYCLIC_NUCLEOTIDE_CATABOLIC_PROCESS	Details ...	17	-0.712891	-1.9736	0.00400802	0.0159009	0.478	1650	tags=47%, list=9%, signal=52%
GO_CALCIUM_MEDIATED_SIGNALING	GO_CALCIUM_MEDIATED_SIGNALING	Details ...	84	-0.528507	-1.97295	0.00204918	0.0159686	0.482	3706	tags=46%, list=20%, signal=58%
GO_SULFUR_COMPOUND_BINDING	GO_SULFUR_COMPOUND_BINDING	Details ...	227	-0.467147	-1.9723	0	0.0159503	0.483	2342	tags=30%, list=13%, signal=34%
GO_EMBRYONIC_DIGESTIVE_TRACT_MORPHOGENESIS	GO_EMBRYONIC_DIGESTIVE_TRACT_MORPHOGENESIS	Details ...	17	-0.708321	-1.97218	0	0.0158385	0.483	1131	tags=41%, list=6%, signal=44%
GO_OUTFLOW_TRACT_MORPHOGENESIS	GO_OUTFLOW_TRACT_MORPHOGENESIS	Details ...	56	-0.565972	-1.97048	0	0.0160534	0.484	4005	tags=52%, list=21%, signal=66%
GO_ADENYLATE_CYCLASE_INHIBITING_G_PROTEIN_COUPLED_RECEPTOR_SIGNALING_PATHWAY	GO_ADENYLATE_CYCLASE_INHIBITING_G_PROTEIN_COUPLED_RECEPTOR_SIGNALING_PATHWAY	Details ...	67	-0.571968	-1.96857	0	0.0163265	0.495	3752	tags=45%, list=20%, signal=56%
GO_REGULATION_OF_VASOCONSTRICTION	GO_REGULATION_OF_VASOCONSTRICTION	Details ...	65	-0.556844	-1.96772	0	0.0163921	0.495	3394	tags=38%, list=18%, signal=47%
GO_AMINOGLYCAN_CATABOLIC_PROCESS	GO_AMINOGLYCAN_CATABOLIC_PROCESS	Details ...	66	-0.533831	-1.96644	0.00206612	0.0165498	0.498	2150	tags=29%, list=11%, signal=32%
GO_PROTEOGLYCAN_BINDING	GO_PROTEOGLYCAN_BINDING	Details ...	28	-0.632608	-1.96608	0.0021097	0.0164629	0.5	1352	tags=29%, list=7%, signal=31%
GO_VASCULATURE_DEVELOPMENT	GO_VASCULATURE_DEVELOPMENT	Details ...	457	-0.481992	-1.96596	0	0.0163623	0.501	2847	tags=36%, list=15%, signal=41%
GO_PLATELET_DENSE_GRANULE	GO_PLATELET_DENSE_GRANULE	Details ...	19	-0.690648	-1.96361	0.00226244	0.0166925	0.506	1219	tags=32%, list=7%, signal=34%
GO_DENDRITIC_SHAFT	GO_DENDRITIC_SHAFT	Details ...	36	-0.596022	-1.96345	0	0.016606	0.507	2262	tags=44%, list=12%, signal=50%
GO_G_PROTEIN_COUPLED_RECEPTOR_ACTIVITY	GO_G_PROTEIN_COUPLED_RECEPTOR_ACTIVITY	Details ...	482	-0.508644	-1.96225	0.00194553	0.0167424	0.508	4141	tags=36%, list=22%, signal=45%
GO_MESONEPHROS_DEVELOPMENT	GO_MESONEPHROS_DEVELOPMENT	Details ...	90	-0.529494	-1.96202	0.00206612	0.0166622	0.508	2476	tags=32%, list=13%, signal=37%
GO_NEGATIVE_REGULATION_OF_ENDOTHELIAL_CELL_MIGRATION	GO_NEGATIVE_REGULATION_OF_ENDOTHELIAL_CELL_MIGRATION	Details ...	35	-0.605876	-1.96169	0.00204918	0.0166239	0.511	2669	tags=43%, list=14%, signal=50%
GO_REGULATION_OF_PHOSPHATIDYLINOSITOL_3_KINASE_SIGNALING	GO_REGULATION_OF_PHOSPHATIDYLINOSITOL_3_KINASE_SIGNALING	Details ...	135	-0.46757	-1.95893	0	0.0171266	0.525	3125	tags=36%, list=17%, signal=43%
GO_ANGIOGENESIS	GO_ANGIOGENESIS	Details ...	284	-0.499444	-1.95833	0.0020202	0.0171277	0.529	2677	tags=38%, list=14%, signal=43%
GO_POSITIVE_REGULATION_OF_ADENYLATE_CYCLASE_ACTIVITY	GO_POSITIVE_REGULATION_OF_ADENYLATE_CYCLASE_ACTIVITY	Details ...	46	-0.5892	-1.95712	0.00207039	0.0173181	0.535	2068	tags=33%, list=11%, signal=37%
GO_COGNITION	GO_COGNITION	Details ...	240	-0.447486	-1.95492	0	0.0177278	0.543	3072	tags=35%, list=16%, signal=42%
GO_REGULATION_OF_CALCIUM_ION_TRANSMEMBRANE_TRANSPORT	GO_REGULATION_OF_CALCIUM_ION_TRANSMEMBRANE_TRANSPORT	Details ...	110	-0.494038	-1.95424	0.00622407	0.0177664	0.544	1992	tags=29%, list=11%, signal=32%
GO_POSITIVE_REGULATION_OF_CELL_SUBSTRATE_ADHESION	GO_POSITIVE_REGULATION_OF_CELL_SUBSTRATE_ADHESION	Details ...	95	-0.50938	-1.95366	0	0.0177267	0.545	2297	tags=35%, list=12%, signal=39%
GO_ACTION_POTENTIAL	GO_ACTION_POTENTIAL	Details ...	92	-0.525759	-1.95301	0.00199601	0.0177523	0.548	2600	tags=33%, list=14%, signal=38%
GO_CONTRACTILE_FIBER	GO_CONTRACTILE_FIBER	Details ...	205	-0.513086	-1.9521	0.00803213	0.0178114	0.553	3285	tags=41%, list=18%, signal=49%
GO_TRANSMEMBRANE_RECEPTOR_PROTEIN_TYROSINE_KINASE_ACTIVITY	GO_TRANSMEMBRANE_RECEPTOR_PROTEIN_TYROSINE_KINASE_ACTIVITY	Details ...	64	-0.546387	-1.9507	0	0.0180371	0.563	2677	tags=48%, list=14%, signal=56%
GO_T_TUBULE	GO_T_TUBULE	Details ...	45	-0.608354	-1.94939	0.00396825	0.0182366	0.566	2936	tags=51%, list=16%, signal=60%
GO_PROTEOGLYCAN_METABOLIC_PROCESS	GO_PROTEOGLYCAN_METABOLIC_PROCESS	Details ...	81	-0.5368	-1.94871	0.00210084	0.0182422	0.566	4027	tags=47%, list=22%, signal=60%
GO_REGULATION_OF_BEHAVIOR	GO_REGULATION_OF_BEHAVIOR	Details ...	61	-0.559343	-1.94832	0	0.0181978	0.566	3872	tags=41%, list=21%, signal=52%
GO_POSITIVE_REGULATION_OF_RELEASE_OF_SEQUESTERED_CALCIUM_ION_INTO_CYTOSOL	GO_POSITIVE_REGULATION_OF_RELEASE_OF_SEQUESTERED_CALCIUM_ION_INTO_CYTOSOL	Details ...	36	-0.567735	-1.94827	0.00406504	0.0180731	0.566	2936	tags=36%, list=16%, signal=43%
GO_NEGATIVE_REGULATION_OF_CALCIUM_MEDIATED_SIGNALING	GO_NEGATIVE_REGULATION_OF_CALCIUM_MEDIATED_SIGNALING	Details ...	18	-0.685685	-1.94731	0.00391389	0.0182118	0.568	1431	tags=39%, list=8%, signal=42%
GO_REGULATION_OF_CATION_TRANSMEMBRANE_TRANSPORT	GO_REGULATION_OF_CATION_TRANSMEMBRANE_TRANSPORT	Details ...	199	-0.447204	-1.94675	0.00413223	0.0182874	0.571	2041	tags=27%, list=11%, signal=30%
GO_VASOCONSTRICTION	GO_VASOCONSTRICTION	Details ...	28	-0.615856	-1.94619	0	0.0182948	0.572	4017	tags=54%, list=21%, signal=68%
GO_DIGESTIVE_SYSTEM_DEVELOPMENT	GO_DIGESTIVE_SYSTEM_DEVELOPMENT	Details ...	142	-0.466675	-1.94489	0	0.0185158	0.579	2242	tags=30%, list=12%, signal=33%
GO_POSITIVE_REGULATION_OF_SYNAPTIC_TRANSMISSION_GLUTAMATERGIC	GO_POSITIVE_REGULATION_OF_SYNAPTIC_TRANSMISSION_GLUTAMATERGIC	Details ...	17	-0.735271	-1.94341	0	0.0186878	0.581	3015	tags=65%, list=16%, signal=77%
GO_REGULATION_OF_SYNAPSE_ORGANIZATION	GO_REGULATION_OF_SYNAPSE_ORGANIZATION	Details ...	105	-0.514019	-1.94249	0	0.0187393	0.583	3776	tags=49%, list=20%, signal=61%
GO_REGULATION_OF_OSTEOBLAST_DIFFERENTIATION	GO_REGULATION_OF_OSTEOBLAST_DIFFERENTIATION	Details ...	107	-0.526357	-1.9421	0.00211416	0.0187174	0.583	3835	tags=46%, list=20%, signal=57%
GO_ACTIN_MEDIATED_CELL_CONTRACTION	GO_ACTIN_MEDIATED_CELL_CONTRACTION	Details ...	72	-0.540551	-1.94108	0.00414079	0.0187917	0.585	2600	tags=40%, list=14%, signal=47%
GO_REGULATION_OF_RENAL_SYSTEM_PROCESS	GO_REGULATION_OF_RENAL_SYSTEM_PROCESS	Details ...	37	-0.598402	-1.94062	0	0.0187518	0.587	3770	tags=51%, list=20%, signal=64%
GO_POSITIVE_REGULATION_OF_CATION_TRANSMEMBRANE_TRANSPORT	GO_POSITIVE_REGULATION_OF_CATION_TRANSMEMBRANE_TRANSPORT	Details ...	91	-0.47969	-1.93996	0.00403226	0.0187855	0.589	2600	tags=31%, list=14%, signal=36%
GO_CYTOSOLIC_CALCIUM_ION_TRANSPORT	GO_CYTOSOLIC_CALCIUM_ION_TRANSPORT	Details ...	52	-0.560253	-1.93696	0.00208768	0.0194042	0.604	3104	tags=44%, list=17%, signal=53%
GO_REGULATION_OF_LIPASE_ACTIVITY	GO_REGULATION_OF_LIPASE_ACTIVITY	Details ...	83	-0.543153	-1.93658	0	0.019388	0.604	3770	tags=43%, list=20%, signal=54%
GO_MESENCHYMAL_CELL_DIFFERENTIATION	GO_MESENCHYMAL_CELL_DIFFERENTIATION	Details ...	131	-0.490953	-1.93621	0	0.019334	0.607	3109	tags=37%, list=17%, signal=45%
GO_NEPHRON_EPITHELIUM_DEVELOPMENT	GO_NEPHRON_EPITHELIUM_DEVELOPMENT	Details ...	93	-0.505763	-1.93571	0.00408998	0.0193248	0.609	2476	tags=30%, list=13%, signal=35%
GO_POSITIVE_REGULATION_OF_CALCIUM_ION_TRANSMEMBRANE_TRANSPORT	GO_POSITIVE_REGULATION_OF_CALCIUM_ION_TRANSMEMBRANE_TRANSPORT	Details ...	55	-0.516607	-1.93441	0.00625	0.0195152	0.611	2600	tags=33%, list=14%, signal=38%
GO_REGULATED_EXOCYTOSIS	GO_REGULATED_EXOCYTOSIS	Details ...	213	-0.457119	-1.93415	0	0.0194911	0.611	4388	tags=40%, list=23%, signal=52%
GO_DELAYED_RECTIFIER_POTASSIUM_CHANNEL_ACTIVITY	GO_DELAYED_RECTIFIER_POTASSIUM_CHANNEL_ACTIVITY	Details ...	35	-0.643108	-1.93397	0	0.0194202	0.612	4096	tags=60%, list=22%, signal=77%
GO_NEURON_PROJECTION_MORPHOGENESIS	GO_NEURON_PROJECTION_MORPHOGENESIS	Details ...	391	-0.458349	-1.93297	0	0.0195062	0.613	3015	tags=35%, list=16%, signal=41%
GO_MUSCLE_CELL_DIFFERENTIATION	GO_MUSCLE_CELL_DIFFERENTIATION	Details ...	226	-0.463211	-1.93282	0.00201207	0.0194221	0.614	2826	tags=33%, list=15%, signal=39%
GO_CELL_MORPHOGENESIS_INVOLVED_IN_NEURON_DIFFERENTIATION	GO_CELL_MORPHOGENESIS_INVOLVED_IN_NEURON_DIFFERENTIATION	Details ...	359	-0.462416	-1.93216	0	0.0194657	0.618	3015	tags=34%, list=16%, signal=40%
GO_LYSOSOMAL_LUMEN	GO_LYSOSOMAL_LUMEN	Details ...	86	-0.546972	-1.93176	0.0120482	0.0194332	0.62	1971	tags=27%, list=11%, signal=30%
GO_INSULIN_LIKE_GROWTH_FACTOR_BINDING	GO_INSULIN_LIKE_GROWTH_FACTOR_BINDING	Details ...	25	-0.68501	-1.93023	0.00211864	0.0196273	0.623	2657	tags=56%, list=14%, signal=65%
GO_MULTICELLULAR_ORGANISM_METABOLIC_PROCESS	GO_MULTICELLULAR_ORGANISM_METABOLIC_PROCESS	Details ...	87	-0.600104	-1.93015	0.00205339	0.0195495	0.623	3049	tags=43%, list=16%, signal=51%
GO_MEMBRANE_DEPOLARIZATION	GO_MEMBRANE_DEPOLARIZATION	Details ...	59	-0.556679	-1.92952	0	0.0195595	0.627	3221	tags=39%, list=17%, signal=47%
GO_PROTEIN_LOCALIZATION_TO_CELL_SURFACE	GO_PROTEIN_LOCALIZATION_TO_CELL_SURFACE	Details ...	22	-0.648363	-1.92947	0	0.0194513	0.627	1736	tags=45%, list=9%, signal=50%
GO_REGULATION_OF_BLOOD_PRESSURE	GO_REGULATION_OF_BLOOD_PRESSURE	Details ...	164	-0.481293	-1.92928	0	0.0193717	0.628	3774	tags=41%, list=20%, signal=51%
GO_DENDRITE_MEMBRANE	GO_DENDRITE_MEMBRANE	Details ...	18	-0.672575	-1.928	0	0.0195388	0.634	1718	tags=39%, list=9%, signal=43%
GO_CAMP_METABOLIC_PROCESS	GO_CAMP_METABOLIC_PROCESS	Details ...	34	-0.627727	-1.92753	0.0021322	0.0194817	0.635	1650	tags=35%, list=9%, signal=39%
GO_FIBRIL_ORGANIZATION	GO_FIBRIL_ORGANIZATION	Details ...	19	-0.719699	-1.92686	0.00617284	0.0195247	0.637	1280	tags=53%, list=7%, signal=56%
GO_POSITIVE_REGULATION_OF_SYNAPTIC_TRANSMISSION	GO_POSITIVE_REGULATION_OF_SYNAPTIC_TRANSMISSION	Details ...	107	-0.490862	-1.92675	0	0.0194508	0.639	3854	tags=44%, list=21%, signal=55%
GO_CHONDROITIN_SULFATE_PROTEOGLYCAN_METABOLIC_PROCESS	GO_CHONDROITIN_SULFATE_PROTEOGLYCAN_METABOLIC_PROCESS	Details ...	42	-0.590723	-1.92327	0.00649351	0.0201449	0.645	3661	tags=48%, list=20%, signal=59%
GO_POSITIVE_REGULATION_OF_VASOCONSTRICTION	GO_POSITIVE_REGULATION_OF_VASOCONSTRICTION	Details ...	35	-0.613686	-1.92137	0	0.0204808	0.652	3394	tags=43%, list=18%, signal=52%
GO_GROWTH_FACTOR_ACTIVITY	GO_GROWTH_FACTOR_ACTIVITY	Details ...	149	-0.467639	-1.9213	0	0.020388	0.652	3125	tags=33%, list=17%, signal=39%
GO_DIVALENT_INORGANIC_CATION_HOMEOSTASIS	GO_DIVALENT_INORGANIC_CATION_HOMEOSTASIS	Details ...	328	-0.429379	-1.92104	0	0.0203663	0.652	3735	tags=38%, list=20%, signal=47%
GO_MULTICELLULAR_ORGANISMAL_SIGNALING	GO_MULTICELLULAR_ORGANISMAL_SIGNALING	Details ...	121	-0.509482	-1.921	0.00203252	0.0202599	0.652	3532	tags=40%, list=19%, signal=49%
GO_POSITIVE_REGULATION_OF_CALCIUM_ION_TRANSPORT_INTO_CYTOSOL	GO_POSITIVE_REGULATION_OF_CALCIUM_ION_TRANSPORT_INTO_CYTOSOL	Details ...	49	-0.540953	-1.92057	0.00204499	0.0202914	0.654	2548	tags=33%, list=14%, signal=38%
GO_ALPHA_ACTININ_BINDING	GO_ALPHA_ACTININ_BINDING	Details ...	21	-0.667014	-1.91941	0.00587084	0.0205211	0.658	2445	tags=43%, list=13%, signal=49%
GO_RETINA_VASCULATURE_DEVELOPMENT_IN_CAMERA_TYPE_EYE	GO_RETINA_VASCULATURE_DEVELOPMENT_IN_CAMERA_TYPE_EYE	Details ...	16	-0.819846	-1.91922	0	0.0204583	0.658	1543	tags=69%, list=8%, signal=75%
GO_TRANSMEMBRANE_RECEPTOR_PROTEIN_SERINE_THREONINE_KINASE_ACTIVITY	GO_TRANSMEMBRANE_RECEPTOR_PROTEIN_SERINE_THREONINE_KINASE_ACTIVITY	Details ...	17	-0.699635	-1.91662	0.004158	0.0209976	0.667	2103	tags=53%, list=11%, signal=60%
GO_PIGMENT_CELL_DIFFERENTIATION	GO_PIGMENT_CELL_DIFFERENTIATION	Details ...	25	-0.565687	-1.91492	0	0.0213175	0.671	1562	tags=40%, list=8%, signal=44%
GO_REGULATION_OF_GLUTAMATE_SECRETION	GO_REGULATION_OF_GLUTAMATE_SECRETION	Details ...	15	-0.698413	-1.91474	0.00409836	0.0212536	0.672	3752	tags=47%, list=20%, signal=58%
GO_SUBSTRATE_ADHESION_DEPENDENT_CELL_SPREADING	GO_SUBSTRATE_ADHESION_DEPENDENT_CELL_SPREADING	Details ...	38	-0.588447	-1.91467	0	0.0211743	0.673	2289	tags=53%, list=12%, signal=60%
GO_REGULATION_OF_NEUROLOGICAL_SYSTEM_PROCESS	GO_REGULATION_OF_NEUROLOGICAL_SYSTEM_PROCESS	Details ...	61	-0.510228	-1.91436	0	0.0211601	0.673	3187	tags=36%, list=17%, signal=43%
GO_POSITIVE_REGULATION_OF_TRANSMEMBRANE_TRANSPORT	GO_POSITIVE_REGULATION_OF_TRANSMEMBRANE_TRANSPORT	Details ...	123	-0.449771	-1.91435	0	0.0210488	0.673	2182	tags=28%, list=12%, signal=31%
GO_REGULATION_OF_CELL_SUBSTRATE_ADHESION	GO_REGULATION_OF_CELL_SUBSTRATE_ADHESION	Details ...	165	-0.473617	-1.91433	0	0.0209487	0.673	2375	tags=33%, list=13%, signal=38%
GO_CELL_DIFFERENTIATION_INVOLVED_IN_KIDNEY_DEVELOPMENT	GO_CELL_DIFFERENTIATION_INVOLVED_IN_KIDNEY_DEVELOPMENT	Details ...	35	-0.574901	-1.91425	0	0.0208454	0.673	3188	tags=43%, list=17%, signal=52%
GO_SIALYLATION	GO_SIALYLATION	Details ...	21	-0.650865	-1.91423	0	0.0207556	0.674	2947	tags=52%, list=16%, signal=62%
GO_REGULATION_OF_CALCIUM_MEDIATED_SIGNALING	GO_REGULATION_OF_CALCIUM_MEDIATED_SIGNALING	Details ...	74	-0.520497	-1.91394	0	0.020719	0.675	2374	tags=32%, list=13%, signal=37%
GO_BONE_GROWTH	GO_BONE_GROWTH	Details ...	20	-0.658319	-1.91381	0	0.0206351	0.676	2957	tags=50%, list=16%, signal=59%
GO_HETEROPHILIC_CELL_CELL_ADHESION_VIA_PLASMA_MEMBRANE_CELL_ADHESION_MOLECULES	GO_HETEROPHILIC_CELL_CELL_ADHESION_VIA_PLASMA_MEMBRANE_CELL_ADHESION_MOLECULES	Details ...	38	-0.569146	-1.91323	0.00196078	0.0206501	0.677	3593	tags=50%, list=19%, signal=62%
GO_NEURON_CELL_CELL_ADHESION	GO_NEURON_CELL_CELL_ADHESION	Details ...	16	-0.78335	-1.91212	0.00207469	0.0207975	0.682	3015	tags=75%, list=16%, signal=89%
GO_REGULATION_OF_SYNAPSE_STRUCTURE_OR_ACTIVITY	GO_REGULATION_OF_SYNAPSE_STRUCTURE_OR_ACTIVITY	Details ...	222	-0.458695	-1.91012	0	0.0211905	0.689	3776	tags=43%, list=20%, signal=53%
GO_REGULATION_OF_DOPAMINE_SECRETION	GO_REGULATION_OF_DOPAMINE_SECRETION	Details ...	21	-0.672732	-1.90959	0.00203666	0.0212329	0.691	4315	tags=62%, list=23%, signal=80%
GO_NEGATIVE_REGULATION_OF_ION_TRANSPORT	GO_NEGATIVE_REGULATION_OF_ION_TRANSPORT	Details ...	121	-0.444433	-1.90841	0	0.0214652	0.697	3770	tags=42%, list=20%, signal=52%
GO_FIBROBLAST_GROWTH_FACTOR_RECEPTOR_BINDING	GO_FIBROBLAST_GROWTH_FACTOR_RECEPTOR_BINDING		28	-0.631549	-1.90831	0	0.0213831	0.697	2611	tags=39%, list=14%, signal=46%
GO_REGULATION_OF_CARDIAC_MUSCLE_CELL_DIFFERENTIATION	GO_REGULATION_OF_CARDIAC_MUSCLE_CELL_DIFFERENTIATION		19	-0.607394	-1.90756	0.00409836	0.0214928	0.703	1285	tags=32%, list=7%, signal=34%
GO_ADENYLATE_CYCLASE_ACTIVATING_G_PROTEIN_COUPLED_RECEPTOR_SIGNALING_PATHWAY	GO_ADENYLATE_CYCLASE_ACTIVATING_G_PROTEIN_COUPLED_RECEPTOR_SIGNALING_PATHWAY		65	-0.559998	-1.90658	0	0.0216649	0.704	3531	tags=38%, list=19%, signal=47%
GO_BODY_MORPHOGENESIS	GO_BODY_MORPHOGENESIS		43	-0.562498	-1.90622	0	0.0216284	0.704	3169	tags=42%, list=17%, signal=50%
GO_PARTURITION	GO_PARTURITION		20	-0.630632	-1.90371	0.00394477	0.0222134	0.715	2595	tags=40%, list=14%, signal=46%
GO_POSITIVE_REGULATION_OF_PATHWAY_RESTRICTED_SMAD_PROTEIN_PHOSPHORYLATION	GO_POSITIVE_REGULATION_OF_PATHWAY_RESTRICTED_SMAD_PROTEIN_PHOSPHORYLATION		44	-0.556419	-1.90214	0.00207469	0.022613	0.72	2462	tags=41%, list=13%, signal=47%
GO_EXCITATORY_POSTSYNAPTIC_POTENTIAL	GO_EXCITATORY_POSTSYNAPTIC_POTENTIAL		26	-0.649886	-1.90193	0.00204082	0.0225427	0.722	3077	tags=50%, list=16%, signal=60%
GO_ACTIVATION_OF_PHOSPHOLIPASE_C_ACTIVITY	GO_ACTIVATION_OF_PHOSPHOLIPASE_C_ACTIVITY		27	-0.641606	-1.90185	0.00205339	0.0224605	0.723	4357	tags=70%, list=23%, signal=92%
GO_DETECTION_OF_MECHANICAL_STIMULUS	GO_DETECTION_OF_MECHANICAL_STIMULUS		39	-0.581813	-1.9013	0.00203666	0.0224961	0.725	2445	tags=36%, list=13%, signal=41%
GO_POTASSIUM_CHANNEL_COMPLEX	GO_POTASSIUM_CHANNEL_COMPLEX		88	-0.533857	-1.90037	0	0.022688	0.728	4096	tags=48%, list=22%, signal=61%
GO_POSITIVE_REGULATION_OF_LYASE_ACTIVITY	GO_POSITIVE_REGULATION_OF_LYASE_ACTIVITY		58	-0.534719	-1.89925	0.00414079	0.0228421	0.73	2068	tags=29%, list=11%, signal=33%
GO_REGULATION_OF_MUSCLE_CONTRACTION	GO_REGULATION_OF_MUSCLE_CONTRACTION		144	-0.480561	-1.89864	0.00392157	0.0229014	0.735	2677	tags=34%, list=14%, signal=39%
GO_NEUROMUSCULAR_JUNCTION	GO_NEUROMUSCULAR_JUNCTION		54	-0.518211	-1.89807	0.00208333	0.022968	0.736	2675	tags=41%, list=14%, signal=47%
GO_ORGAN_GROWTH	GO_ORGAN_GROWTH		65	-0.532224	-1.89771	0.00210526	0.0230039	0.738	4039	tags=48%, list=22%, signal=61%
GO_ACTIVATION_OF_ADENYLATE_CYCLASE_ACTIVITY	GO_ACTIVATION_OF_ADENYLATE_CYCLASE_ACTIVITY		39	-0.57412	-1.89768	0.00205339	0.0229067	0.738	2528	tags=36%, list=14%, signal=41%
GO_PHOSPHATIDYLSERINE_BINDING	GO_PHOSPHATIDYLSERINE_BINDING		32	-0.5406	-1.89657	0	0.0231397	0.741	4109	tags=53%, list=22%, signal=68%
GO_REGULATION_OF_ENDOTHELIAL_CELL_MIGRATION	GO_REGULATION_OF_ENDOTHELIAL_CELL_MIGRATION		108	-0.497039	-1.8959	0	0.0231766	0.742	2681	tags=38%, list=14%, signal=44%
GO_CYCLIC_NUCLEOTIDE_BINDING	GO_CYCLIC_NUCLEOTIDE_BINDING		34	-0.570115	-1.89503	0.00617284	0.0233137	0.747	3191	tags=38%, list=17%, signal=46%
GO_AMINOGLYCAN_BIOSYNTHETIC_PROCESS	GO_AMINOGLYCAN_BIOSYNTHETIC_PROCESS		104	-0.501048	-1.89484	0.00803213	0.0232601	0.748	2947	tags=36%, list=16%, signal=42%
GO_KIDNEY_MORPHOGENESIS	GO_KIDNEY_MORPHOGENESIS		82	-0.499566	-1.89378	0.00206186	0.0234672	0.749	1477	tags=26%, list=8%, signal=28%
GO_MAIN_AXON	GO_MAIN_AXON		57	-0.524128	-1.89307	0	0.0235551	0.751	3160	tags=35%, list=17%, signal=42%
GO_CYCLIC_NUCLEOTIDE_MEDIATED_SIGNALING	GO_CYCLIC_NUCLEOTIDE_MEDIATED_SIGNALING		45	-0.565066	-1.89292	0.00396825	0.0234998	0.752	1942	tags=33%, list=10%, signal=37%
GO_REGULATION_OF_N_METHYL_D_ASPARTATE_SELECTIVE_GLUTAMATE_RECEPTOR_ACTIVITY	GO_REGULATION_OF_N_METHYL_D_ASPARTATE_SELECTIVE_GLUTAMATE_RECEPTOR_ACTIVITY		15	-0.700814	-1.89292	0.00608519	0.0233945	0.752	1882	tags=40%, list=10%, signal=44%
GO_POSITIVE_REGULATION_OF_CHEMOTAXIS	GO_POSITIVE_REGULATION_OF_CHEMOTAXIS		118	-0.513756	-1.89281	0.0039604	0.0233205	0.753	3272	tags=42%, list=17%, signal=50%
GO_REGULATION_OF_CARDIAC_CONDUCTION	GO_REGULATION_OF_CARDIAC_CONDUCTION		66	-0.545642	-1.89172	0.0104822	0.0234988	0.755	3770	tags=52%, list=20%, signal=64%
GO_POSITIVE_REGULATION_OF_LIPASE_ACTIVITY	GO_POSITIVE_REGULATION_OF_LIPASE_ACTIVITY		66	-0.547525	-1.89129	0	0.0235282	0.76	3770	tags=45%, list=20%, signal=57%
GO_REGULATION_OF_MEMBRANE_POTENTIAL	GO_REGULATION_OF_MEMBRANE_POTENTIAL		329	-0.41971	-1.89096	0	0.0235038	0.76	3248	tags=33%, list=17%, signal=40%
GO_COPULATION	GO_COPULATION		17	-0.704797	-1.89065	0	0.023483	0.76	2346	tags=35%, list=13%, signal=40%
GO_POSITIVE_REGULATION_OF_NEURON_DIFFERENTIATION	GO_POSITIVE_REGULATION_OF_NEURON_DIFFERENTIATION		295	-0.448651	-1.88891	0	0.023826	0.766	3299	tags=36%, list=18%, signal=43%
GO_NEURON_SPINE	GO_NEURON_SPINE		116	-0.451763	-1.88828	0	0.0239245	0.769	2574	tags=30%, list=14%, signal=35%
GO_POSITIVE_REGULATION_OF_BLOOD_PRESSURE	GO_POSITIVE_REGULATION_OF_BLOOD_PRESSURE		35	-0.571485	-1.88799	0.00594059	0.0238995	0.77	3770	tags=51%, list=20%, signal=64%
GO_TRANSFORMING_GROWTH_FACTOR_BETA_BINDING	GO_TRANSFORMING_GROWTH_FACTOR_BETA_BINDING		16	-0.807852	-1.88683	0.00204082	0.0240735	0.773	2369	tags=81%, list=13%, signal=93%
GO_HEART_DEVELOPMENT	GO_HEART_DEVELOPMENT		449	-0.429808	-1.88668	0.0021322	0.0240101	0.773	3318	tags=33%, list=18%, signal=39%
GO_REGULATION_OF_RESPIRATORY_SYSTEM_PROCESS	GO_REGULATION_OF_RESPIRATORY_SYSTEM_PROCESS		15	-0.742734	-1.88381	0.00204918	0.0247041	0.782	2218	tags=60%, list=12%, signal=68%
GO_POSITIVE_REGULATION_OF_MYOBLAST_DIFFERENTIATION	GO_POSITIVE_REGULATION_OF_MYOBLAST_DIFFERENTIATION		21	-0.661968	-1.88367	0.00824742	0.024638	0.782	3038	tags=43%, list=16%, signal=51%
GO_DETECTION_OF_BIOTIC_STIMULUS	GO_DETECTION_OF_BIOTIC_STIMULUS		25	-0.674382	-1.88331	0.00590551	0.0246323	0.782	2769	tags=52%, list=15%, signal=61%
GO_ANCHORED_COMPONENT_OF_MEMBRANE	GO_ANCHORED_COMPONENT_OF_MEMBRANE		144	-0.445935	-1.88313	0	0.0245596	0.782	3970	tags=32%, list=21%, signal=40%
GO_POSITIVE_REGULATION_OF_CALCIUM_ION_TRANSPORT	GO_POSITIVE_REGULATION_OF_CALCIUM_ION_TRANSPORT		102	-0.478963	-1.88235	0	0.0247063	0.782	2669	tags=31%, list=14%, signal=36%
GO_COLLAGEN_FIBRIL_ORGANIZATION	GO_COLLAGEN_FIBRIL_ORGANIZATION		36	-0.697424	-1.88112	0.0188679	0.0250078	0.788	2103	tags=56%, list=11%, signal=62%
GO_CGMP_BINDING	GO_CGMP_BINDING		15	-0.696085	-1.87814	0.002	0.0257874	0.8	1511	tags=27%, list=8%, signal=29%
GO_HOMOPHILIC_CELL_ADHESION_VIA_PLASMA_MEMBRANE_ADHESION_MOLECULES	GO_HOMOPHILIC_CELL_ADHESION_VIA_PLASMA_MEMBRANE_ADHESION_MOLECULES		147	-0.535302	-1.87813	0.00212766	0.0256804	0.8	4019	tags=48%, list=21%, signal=61%
GO_SINGLE_ORGANISM_BEHAVIOR	GO_SINGLE_ORGANISM_BEHAVIOR		373	-0.4207	-1.87575	0	0.0262122	0.809	3094	tags=32%, list=17%, signal=37%
GO_FOREBRAIN_CELL_MIGRATION	GO_FOREBRAIN_CELL_MIGRATION		60	-0.519857	-1.87506	0.0021978	0.0262631	0.812	3015	tags=42%, list=16%, signal=50%
GO_EXTRACELLULAR_MATRIX_ASSEMBLY	GO_EXTRACELLULAR_MATRIX_ASSEMBLY		16	-0.745066	-1.87486	0	0.026211	0.813	2847	tags=75%, list=15%, signal=88%
GO_POSITIVE_REGULATION_OF_NERVOUS_SYSTEM_DEVELOPMENT	GO_POSITIVE_REGULATION_OF_NERVOUS_SYSTEM_DEVELOPMENT		413	-0.421822	-1.87481	0	0.0261169	0.813	3299	tags=35%, list=18%, signal=42%
GO_POSITIVE_REGULATION_OF_CATION_CHANNEL_ACTIVITY	GO_POSITIVE_REGULATION_OF_CATION_CHANNEL_ACTIVITY		36	-0.5374	-1.8737	0.00828157	0.0263593	0.813	1628	tags=28%, list=9%, signal=30%
GO_LEARNING	GO_LEARNING		125	-0.468726	-1.87249	0.00202429	0.0265902	0.813	2418	tags=33%, list=13%, signal=37%
GO_PHOSPHATIDYLINOSITOL_3_KINASE_ACTIVITY	GO_PHOSPHATIDYLINOSITOL_3_KINASE_ACTIVITY		70	-0.493552	-1.87241	0	0.026509	0.813	3354	tags=37%, list=18%, signal=45%
GO_DEVELOPMENTAL_PIGMENTATION	GO_DEVELOPMENTAL_PIGMENTATION		36	-0.513995	-1.87229	0	0.0264381	0.813	1562	tags=31%, list=8%, signal=33%
GO_G_PROTEIN_BETA_GAMMA_SUBUNIT_COMPLEX_BINDING	GO_G_PROTEIN_BETA_GAMMA_SUBUNIT_COMPLEX_BINDING		20	-0.613621	-1.8717	0	0.0265416	0.815	3752	tags=50%, list=20%, signal=62%
GO_REGULATION_OF_CHEMOTAXIS	GO_REGULATION_OF_CHEMOTAXIS		176	-0.474739	-1.87123	0.00207039	0.0265728	0.816	3415	tags=38%, list=18%, signal=46%
GO_REGULATION_OF_SMAD_PROTEIN_IMPORT_INTO_NUCLEUS	GO_REGULATION_OF_SMAD_PROTEIN_IMPORT_INTO_NUCLEUS		16	-0.687801	-1.87045	0	0.0266894	0.818	2657	tags=56%, list=14%, signal=66%
GO_ARTERY_DEVELOPMENT	GO_ARTERY_DEVELOPMENT		75	-0.537773	-1.86941	0.0042735	0.0269438	0.823	2263	tags=32%, list=12%, signal=36%
GO_UROGENITAL_SYSTEM_DEVELOPMENT	GO_UROGENITAL_SYSTEM_DEVELOPMENT		296	-0.42208	-1.86917	0	0.0268945	0.823	2649	tags=28%, list=14%, signal=32%
GO_REGULATION_OF_ENDOTHELIAL_CELL_PROLIFERATION	GO_REGULATION_OF_ENDOTHELIAL_CELL_PROLIFERATION		95	-0.495883	-1.86906	0.00609756	0.0268071	0.823	3272	tags=44%, list=17%, signal=53%
GO_PERIKARYON	GO_PERIKARYON		99	-0.489972	-1.86885	0.0020202	0.0267721	0.823	3008	tags=40%, list=16%, signal=48%
GO_CATION_CHANNEL_COMPLEX	GO_CATION_CHANNEL_COMPLEX		159	-0.507087	-1.86826	0.00205761	0.0268636	0.823	3750	tags=40%, list=20%, signal=50%
GO_FRIZZLED_BINDING	GO_FRIZZLED_BINDING		36	-0.563879	-1.86692	0	0.0271545	0.825	1577	tags=28%, list=8%, signal=30%
GO_RENAL_SYSTEM_VASCULATURE_DEVELOPMENT	GO_RENAL_SYSTEM_VASCULATURE_DEVELOPMENT		19	-0.745754	-1.86547	0.00581395	0.0274882	0.826	2542	tags=63%, list=14%, signal=73%
GO_SMOOTHENED_SIGNALING_PATHWAY	GO_SMOOTHENED_SIGNALING_PATHWAY		69	-0.496716	-1.86516	0.004	0.0274642	0.826	2263	tags=28%, list=12%, signal=31%
GO_STEM_CELL_DIFFERENTIATION	GO_STEM_CELL_DIFFERENTIATION		186	-0.450315	-1.86502	0	0.0274266	0.827	3109	tags=35%, list=17%, signal=41%
GO_MYOFIBRIL_ASSEMBLY	GO_MYOFIBRIL_ASSEMBLY		45	-0.609913	-1.86426	0.00413223	0.0275625	0.828	3191	tags=56%, list=17%, signal=67%
GO_MODULATION_OF_SYNAPTIC_TRANSMISSION	GO_MODULATION_OF_SYNAPTIC_TRANSMISSION		291	-0.443597	-1.86393	0	0.0275246	0.829	3854	tags=40%, list=21%, signal=49%
GO_SYNAPTIC_MEMBRANE	GO_SYNAPTIC_MEMBRANE		251	-0.442574	-1.86376	0	0.0274519	0.829	3139	tags=33%, list=17%, signal=39%
GO_NEGATIVE_REGULATION_OF_EPITHELIAL_CELL_MIGRATION	GO_NEGATIVE_REGULATION_OF_EPITHELIAL_CELL_MIGRATION		49	-0.515467	-1.86226	0	0.0278062	0.836	2669	tags=35%, list=14%, signal=40%
GO_REGULATION_OF_MYOBLAST_DIFFERENTIATION	GO_REGULATION_OF_MYOBLAST_DIFFERENTIATION		45	-0.532142	-1.86198	0.0101833	0.0277847	0.836	3268	tags=38%, list=17%, signal=46%
GO_REGULATION_OF_MUSCLE_SYSTEM_PROCESS	GO_REGULATION_OF_MUSCLE_SYSTEM_PROCESS		191	-0.448634	-1.85899	0.00393701	0.0285526	0.842	3772	tags=41%, list=20%, signal=51%
GO_POSITIVE_REGULATION_OF_CALCIUM_ION_IMPORT	GO_POSITIVE_REGULATION_OF_CALCIUM_ION_IMPORT		51	-0.517033	-1.85842	0.00204082	0.0286317	0.844	2936	tags=35%, list=16%, signal=42%
GO_MULTICELLULAR_ORGANISMAL_MACROMOLECULE_METABOLIC_PROCESS	GO_MULTICELLULAR_ORGANISMAL_MACROMOLECULE_METABOLIC_PROCESS		73	-0.612426	-1.85833	0.0102459	0.0285511	0.844	3001	tags=45%, list=16%, signal=54%
GO_BRANCHING_INVOLVED_IN_URETERIC_BUD_MORPHOGENESIS	GO_BRANCHING_INVOLVED_IN_URETERIC_BUD_MORPHOGENESIS		44	-0.55859	-1.85813	0.00621118	0.0285063	0.844	1185	tags=27%, list=6%, signal=29%
GO_MESENCHYME_MORPHOGENESIS	GO_MESENCHYME_MORPHOGENESIS		38	-0.592305	-1.85628	0.00193424	0.0289193	0.846	2686	tags=45%, list=14%, signal=52%
GO_3_5_CYCLIC_AMP_PHOSPHODIESTERASE_ACTIVITY	GO_3_5_CYCLIC_AMP_PHOSPHODIESTERASE_ACTIVITY		15	-0.713391	-1.85584	0.00406504	0.0289289	0.846	1650	tags=47%, list=9%, signal=51%
GO_MUSCLE_CELL_DEVELOPMENT	GO_MUSCLE_CELL_DEVELOPMENT		119	-0.476219	-1.85564	0.00608519	0.0288932	0.847	3191	tags=39%, list=17%, signal=46%
GO_REGULATION_OF_EXCRETION	GO_REGULATION_OF_EXCRETION		28	-0.609914	-1.85494	0.00627615	0.0290156	0.848	3770	tags=46%, list=20%, signal=58%
GO_HEART_PROCESS	GO_HEART_PROCESS		83	-0.480297	-1.85488	0.00617284	0.028943	0.849	3221	tags=42%, list=17%, signal=51%
GO_RECEPTOR_INTERNALIZATION	GO_RECEPTOR_INTERNALIZATION		46	-0.53371	-1.85481	0.00389105	0.0288536	0.849	4031	tags=50%, list=22%, signal=64%
GO_WNT_ACTIVATED_RECEPTOR_ACTIVITY	GO_WNT_ACTIVATED_RECEPTOR_ACTIVITY		22	-0.618186	-1.85426	0.00407332	0.0289293	0.85	2060	tags=41%, list=11%, signal=46%
GO_REGULATION_OF_SMOOTHENED_SIGNALING_PATHWAY	GO_REGULATION_OF_SMOOTHENED_SIGNALING_PATHWAY		62	-0.549306	-1.85364	0.00210526	0.0289958	0.851	2263	tags=37%, list=12%, signal=42%
GO_POSITIVE_REGULATION_OF_TRANSMEMBRANE_RECEPTOR_PROTEIN_SERINE_THREONINE_KINASE_SIGNALING_PATHWAY	GO_POSITIVE_REGULATION_OF_TRANSMEMBRANE_RECEPTOR_PROTEIN_SERINE_THREONINE_KINASE_SIGNALING_PATHWAY		95	-0.462396	-1.8528	0	0.0292168	0.854	2462	tags=32%, list=13%, signal=36%
GO_POSITIVE_REGULATION_OF_SMALL_GTPASE_MEDIATED_SIGNAL_TRANSDUCTION	GO_POSITIVE_REGULATION_OF_SMALL_GTPASE_MEDIATED_SIGNAL_TRANSDUCTION		38	-0.547634	-1.85194	0.00401606	0.0293867	0.855	2155	tags=34%, list=12%, signal=39%
GO_NEGATIVE_REGULATION_OF_CARTILAGE_DEVELOPMENT	GO_NEGATIVE_REGULATION_OF_CARTILAGE_DEVELOPMENT		23	-0.656057	-1.85181	0.00622407	0.0293189	0.855	3732	tags=70%, list=20%, signal=87%
GO_MEMBRANE_MICRODOMAIN	GO_MEMBRANE_MICRODOMAIN		283	-0.413644	-1.85162	0	0.0292578	0.855	3221	tags=33%, list=17%, signal=39%
GO_NEUROMUSCULAR_PROCESS_CONTROLLING_BALANCE	GO_NEUROMUSCULAR_PROCESS_CONTROLLING_BALANCE		50	-0.529248	-1.8514	0.0042735	0.0292134	0.855	3015	tags=38%, list=16%, signal=45%
GO_BEHAVIOR	GO_BEHAVIOR		496	-0.41011	-1.85118	0	0.0291776	0.855	3874	tags=36%, list=21%, signal=44%
GO_NEUROPEPTIDE_SIGNALING_PATHWAY	GO_NEUROPEPTIDE_SIGNALING_PATHWAY		88	-0.513852	-1.84976	0	0.0295826	0.857	4200	tags=39%, list=22%, signal=50%
GO_NEGATIVE_REGULATION_OF_SYNAPTIC_TRANSMISSION	GO_NEGATIVE_REGULATION_OF_SYNAPTIC_TRANSMISSION		59	-0.502764	-1.84946	0.00404858	0.0295525	0.857	3772	tags=49%, list=20%, signal=61%
GO_REGULATION_OF_ENDOTHELIAL_CELL_APOPTOTIC_PROCESS	GO_REGULATION_OF_ENDOTHELIAL_CELL_APOPTOTIC_PROCESS		39	-0.561009	-1.84937	0.0020202	0.0294718	0.857	2823	tags=31%, list=15%, signal=36%
GO_TAXIS	GO_TAXIS		443	-0.413923	-1.8492	0	0.0294308	0.857	3301	tags=33%, list=18%, signal=39%
GO_CALCIUM_ION_IMPORT_INTO_CYTOSOL	GO_CALCIUM_ION_IMPORT_INTO_CYTOSOL		41	-0.543847	-1.84912	0.0144628	0.029338	0.857	3815	tags=46%, list=20%, signal=58%
GO_POSTSYNAPTIC_MEMBRANE	GO_POSTSYNAPTIC_MEMBRANE		199	-0.44683	-1.84772	0	0.0296851	0.861	3488	tags=35%, list=19%, signal=43%
GO_SARCOPLASM	GO_SARCOPLASM		66	-0.501522	-1.84722	0.0118812	0.0297486	0.861	2745	tags=39%, list=15%, signal=46%
GO_NODE_OF_RANVIER	GO_NODE_OF_RANVIER		15	-0.655042	-1.84631	0	0.0299184	0.863	1418	tags=33%, list=8%, signal=36%
GO_SKELETAL_SYSTEM_DEVELOPMENT	GO_SKELETAL_SYSTEM_DEVELOPMENT		441	-0.412067	-1.84613	0.00205339	0.0298448	0.863	3170	tags=31%, list=17%, signal=36%
GO_ACTIN_FILAMENT_BASED_MOVEMENT	GO_ACTIN_FILAMENT_BASED_MOVEMENT		91	-0.474966	-1.84454	0.00613497	0.0301714	0.866	2600	tags=35%, list=14%, signal=41%
GO_POSITIVE_REGULATION_OF_TRANSPORTER_ACTIVITY	GO_POSITIVE_REGULATION_OF_TRANSPORTER_ACTIVITY		72	-0.454134	-1.84432	0.0041841	0.0301641	0.868	1628	tags=24%, list=9%, signal=26%
GO_POSTSYNAPSE	GO_POSTSYNAPSE		366	-0.419901	-1.84184	0	0.0308869	0.873	3303	tags=33%, list=18%, signal=39%
GO_CALCIUM_ION_TRANSPORT	GO_CALCIUM_ION_TRANSPORT		209	-0.436062	-1.84139	0	0.0309182	0.875	3140	tags=32%, list=17%, signal=38%
GO_AXONAL_FASCICULATION	GO_AXONAL_FASCICULATION		20	-0.65927	-1.84132	0.00204918	0.03086	0.875	2251	tags=50%, list=12%, signal=57%
GO_CELL_CELL_ADHESION_VIA_PLASMA_MEMBRANE_ADHESION_MOLECULES	GO_CELL_CELL_ADHESION_VIA_PLASMA_MEMBRANE_ADHESION_MOLECULES		193	-0.482059	-1.83817	0.00214133	0.0319057	0.877	4064	tags=44%, list=22%, signal=56%
GO_NEGATIVE_REGULATION_OF_CATECHOLAMINE_SECRETION	GO_NEGATIVE_REGULATION_OF_CATECHOLAMINE_SECRETION		16	-0.684942	-1.83806	0.00821355	0.0318354	0.877	4694	tags=63%, list=25%, signal=83%
GO_NEURON_PROJECTION_GUIDANCE	GO_NEURON_PROJECTION_GUIDANCE		199	-0.444679	-1.83791	0.00203666	0.0317799	0.877	3301	tags=35%, list=18%, signal=42%
GO_MUCOPOLYSACCHARIDE_METABOLIC_PROCESS	GO_MUCOPOLYSACCHARIDE_METABOLIC_PROCESS		105	-0.486447	-1.83769	0.00419287	0.0317085	0.877	3661	tags=41%, list=20%, signal=51%
GO_GANGLIOSIDE_BIOSYNTHETIC_PROCESS	GO_GANGLIOSIDE_BIOSYNTHETIC_PROCESS		18	-0.650006	-1.83709	0.00409836	0.0318034	0.878	3202	tags=56%, list=17%, signal=67%
GO_METANEPHRIC_NEPHRON_MORPHOGENESIS	GO_METANEPHRIC_NEPHRON_MORPHOGENESIS		21	-0.603583	-1.83678	0.0019802	0.0318343	0.878	1132	tags=29%, list=6%, signal=30%
GO_REGULATION_OF_GASTRULATION	GO_REGULATION_OF_GASTRULATION		32	-0.564283	-1.83659	0.0100402	0.0317755	0.878	2170	tags=38%, list=12%, signal=42%
GO_REGULATION_OF_RYANODINE_SENSITIVE_CALCIUM_RELEASE_CHANNEL_ACTIVITY	GO_REGULATION_OF_RYANODINE_SENSITIVE_CALCIUM_RELEASE_CHANNEL_ACTIVITY		26	-0.59259	-1.83547	0.011811	0.0320006	0.879	1920	tags=38%, list=10%, signal=43%
GO_NEGATIVE_REGULATION_OF_CALCIUM_ION_TRANSPORT_INTO_CYTOSOL	GO_NEGATIVE_REGULATION_OF_CALCIUM_ION_TRANSPORT_INTO_CYTOSOL		19	-0.618047	-1.83507	0.00608519	0.0320565	0.88	1920	tags=37%, list=10%, signal=41%
GO_MEMBRANE_BIOGENESIS	GO_MEMBRANE_BIOGENESIS		30	-0.567226	-1.83472	0.00773694	0.0320847	0.88	3371	tags=43%, list=18%, signal=53%
GO_RESPONSE_TO_PROSTAGLANDIN	GO_RESPONSE_TO_PROSTAGLANDIN		34	-0.544458	-1.83454	0.00205339	0.0320608	0.88	2617	tags=38%, list=14%, signal=44%
GO_POSITIVE_REGULATION_OF_LOCOMOTION	GO_POSITIVE_REGULATION_OF_LOCOMOTION		397	-0.417363	-1.83429	0.00208333	0.0320352	0.882	3285	tags=35%, list=18%, signal=41%
GO_CARDIAC_MUSCLE_CELL_ACTION_POTENTIAL	GO_CARDIAC_MUSCLE_CELL_ACTION_POTENTIAL		36	-0.577261	-1.83413	0.0118812	0.0319731	0.883	2600	tags=50%, list=14%, signal=58%
GO_MESENCHYMAL_TO_EPITHELIAL_TRANSITION	GO_MESENCHYMAL_TO_EPITHELIAL_TRANSITION		15	-0.660323	-1.83303	0	0.032297	0.884	2823	tags=47%, list=15%, signal=55%
GO_TRANSMEMBRANE_RECEPTOR_PROTEIN_SERINE_THREONINE_KINASE_SIGNALING_PATHWAY	GO_TRANSMEMBRANE_RECEPTOR_PROTEIN_SERINE_THREONINE_KINASE_SIGNALING_PATHWAY		183	-0.42205	-1.83244	0.00207039	0.03248	0.886	3049	tags=32%, list=16%, signal=37%
GO_CALCIUM_ACTIVATED_POTASSIUM_CHANNEL_ACTIVITY	GO_CALCIUM_ACTIVATED_POTASSIUM_CHANNEL_ACTIVITY		16	-0.675178	-1.83221	0.0020202	0.0324618	0.886	411	tags=19%, list=2%, signal=19%
GO_NEGATIVE_REGULATION_OF_SMOOTH_MUSCLE_CELL_PROLIFERATION	GO_NEGATIVE_REGULATION_OF_SMOOTH_MUSCLE_CELL_PROLIFERATION		35	-0.564184	-1.83119	0.002	0.0327118	0.887	2247	tags=37%, list=12%, signal=42%
GO_GLYCOSPHINGOLIPID_BIOSYNTHETIC_PROCESS	GO_GLYCOSPHINGOLIPID_BIOSYNTHETIC_PROCESS		24	-0.587763	-1.8307	0.00204918	0.0327843	0.887	3202	tags=50%, list=17%, signal=60%
GO_REGULATION_OF_RELEASE_OF_SEQUESTERED_CALCIUM_ION_INTO_CYTOSOL_BY_SARCOPLASMIC_RETICULUM	GO_REGULATION_OF_RELEASE_OF_SEQUESTERED_CALCIUM_ION_INTO_CYTOSOL_BY_SARCOPLASMIC_RETICULUM		25	-0.658169	-1.82991	0.0177165	0.0329773	0.889	1431	tags=44%, list=8%, signal=48%
GO_VOLTAGE_GATED_SODIUM_CHANNEL_ACTIVITY	GO_VOLTAGE_GATED_SODIUM_CHANNEL_ACTIVITY		20	-0.683798	-1.82936	0.00614754	0.0330398	0.89	2225	tags=35%, list=12%, signal=40%
GO_REGULATION_OF_MONONUCLEAR_CELL_MIGRATION	GO_REGULATION_OF_MONONUCLEAR_CELL_MIGRATION		16	-0.696071	-1.82743	0.00994036	0.0335397	0.894	3403	tags=56%, list=18%, signal=69%
GO_NEGATIVE_REGULATION_OF_MUSCLE_TISSUE_DEVELOPMENT	GO_NEGATIVE_REGULATION_OF_MUSCLE_TISSUE_DEVELOPMENT		35	-0.562987	-1.82656	0.0021978	0.0337143	0.895	2936	tags=43%, list=16%, signal=51%
GO_POSITIVE_REGULATION_OF_GLUCOSE_TRANSPORT	GO_POSITIVE_REGULATION_OF_GLUCOSE_TRANSPORT		39	-0.52846	-1.82633	0.00614754	0.0336679	0.896	3461	tags=44%, list=18%, signal=53%
GO_VESICLE_LUMEN	GO_VESICLE_LUMEN		101	-0.538932	-1.82514	0.00626305	0.0340173	0.898	3077	tags=33%, list=16%, signal=39%
GO_PEPTIDE_HORMONE_BINDING	GO_PEPTIDE_HORMONE_BINDING		36	-0.567914	-1.82505	0.00396825	0.0339338	0.899	4288	tags=56%, list=23%, signal=72%
GO_ADRENERGIC_RECEPTOR_SIGNALING_PATHWAY	GO_ADRENERGIC_RECEPTOR_SIGNALING_PATHWAY		18	-0.642713	-1.82341	0.00592885	0.0344174	0.901	1482	tags=28%, list=8%, signal=30%
GO_POSITIVE_REGULATION_OF_MUSCLE_CELL_DIFFERENTIATION	GO_POSITIVE_REGULATION_OF_MUSCLE_CELL_DIFFERENTIATION		81	-0.470333	-1.82275	0.00592885	0.0345359	0.904	2759	tags=30%, list=15%, signal=35%
GO_CALCIUM_CHANNEL_REGULATOR_ACTIVITY	GO_CALCIUM_CHANNEL_REGULATOR_ACTIVITY		37	-0.517432	-1.82236	0.00804829	0.0346171	0.904	1267	tags=24%, list=7%, signal=26%
GO_REGULATION_OF_EPITHELIAL_CELL_MIGRATION	GO_REGULATION_OF_EPITHELIAL_CELL_MIGRATION		160	-0.445118	-1.82172	0.00207039	0.034735	0.904	2847	tags=35%, list=15%, signal=41%
GO_REGULATION_OF_FIBROBLAST_GROWTH_FACTOR_RECEPTOR_SIGNALING_PATHWAY	GO_REGULATION_OF_FIBROBLAST_GROWTH_FACTOR_RECEPTOR_SIGNALING_PATHWAY		25	-0.583565	-1.81957	0.00635593	0.0353994	0.906	3272	tags=44%, list=17%, signal=53%
GO_METANEPHRIC_NEPHRON_DEVELOPMENT	GO_METANEPHRIC_NEPHRON_DEVELOPMENT		32	-0.567118	-1.8193	0.00779727	0.0353904	0.906	2143	tags=34%, list=11%, signal=39%
GO_REGULATION_OF_VASCULAR_PERMEABILITY	GO_REGULATION_OF_VASCULAR_PERMEABILITY		30	-0.580839	-1.81918	0.00814664	0.035318	0.906	1285	tags=33%, list=7%, signal=36%
GO_CHANNEL_REGULATOR_ACTIVITY	GO_CHANNEL_REGULATOR_ACTIVITY		125	-0.437972	-1.81848	0.00208333	0.0354605	0.907	3360	tags=34%, list=18%, signal=42%
GO_POSITIVE_REGULATION_OF_CELL_DEVELOPMENT	GO_POSITIVE_REGULATION_OF_CELL_DEVELOPMENT		451	-0.394521	-1.81826	0	0.0354463	0.909	3299	tags=32%, list=18%, signal=38%
GO_RESPONSE_TO_VITAMIN_D	GO_RESPONSE_TO_VITAMIN_D		33	-0.541772	-1.81791	0.0020202	0.0354909	0.91	4043	tags=42%, list=22%, signal=54%
GO_REGULATION_OF_RENAL_SODIUM_EXCRETION	GO_REGULATION_OF_RENAL_SODIUM_EXCRETION		23	-0.623168	-1.81582	0.0041841	0.0362065	0.913	3770	tags=43%, list=20%, signal=54%
GO_VACUOLAR_LUMEN	GO_VACUOLAR_LUMEN		110	-0.495637	-1.815	0.0125786	0.0364122	0.915	2281	tags=25%, list=12%, signal=28%
GO_RENAL_SYSTEM_PROCESS	GO_RENAL_SYSTEM_PROCESS		98	-0.460286	-1.81397	0	0.0367081	0.916	3770	tags=40%, list=20%, signal=50%
GO_CARDIAC_CONDUCTION	GO_CARDIAC_CONDUCTION		81	-0.491294	-1.81281	0.0136187	0.0369525	0.918	3532	tags=43%, list=19%, signal=53%
GO_REGULATION_OF_TRANSMEMBRANE_TRANSPORT	GO_REGULATION_OF_TRANSMEMBRANE_TRANSPORT		408	-0.395597	-1.81279	0	0.0368431	0.918	3770	tags=33%, list=20%, signal=41%
GO_CELL_RECOGNITION	GO_CELL_RECOGNITION		123	-0.441186	-1.81216	0	0.036974	0.919	3968	tags=39%, list=21%, signal=49%
GO_REGULATION_OF_CALCIUM_ION_TRANSMEMBRANE_TRANSPORTER_ACTIVITY	GO_REGULATION_OF_CALCIUM_ION_TRANSMEMBRANE_TRANSPORTER_ACTIVITY		67	-0.484254	-1.81178	0.0144928	0.0370204	0.921	1920	tags=30%, list=10%, signal=33%
GO_CHONDROITIN_SULFATE_BIOSYNTHETIC_PROCESS	GO_CHONDROITIN_SULFATE_BIOSYNTHETIC_PROCESS		25	-0.628358	-1.81164	0.0104384	0.0369567	0.921	3661	tags=56%, list=20%, signal=70%
GO_PHAGOCYTOSIS_RECOGNITION	GO_PHAGOCYTOSIS_RECOGNITION		15	-0.689702	-1.81034	0.012024	0.0373508	0.921	2322	tags=47%, list=12%, signal=53%
GO_MUSCLE_TISSUE_DEVELOPMENT	GO_MUSCLE_TISSUE_DEVELOPMENT		261	-0.411166	-1.80969	0.00201207	0.0374489	0.922	3951	tags=36%, list=21%, signal=45%
GO_DETECTION_OF_MECHANICAL_STIMULUS_INVOLVED_IN_SENSORY_PERCEPTION	GO_DETECTION_OF_MECHANICAL_STIMULUS_INVOLVED_IN_SENSORY_PERCEPTION		23	-0.595899	-1.80827	0.002079	0.0378082	0.924	1564	tags=35%, list=8%, signal=38%
GO_REGULATION_OF_VASCULAR_ENDOTHELIAL_GROWTH_FACTOR_RECEPTOR_SIGNALING_PATHWAY	GO_REGULATION_OF_VASCULAR_ENDOTHELIAL_GROWTH_FACTOR_RECEPTOR_SIGNALING_PATHWAY		26	-0.601956	-1.80826	0.00616016	0.0377013	0.924	2985	tags=46%, list=16%, signal=55%
GO_REGULATION_OF_TRANSPORTER_ACTIVITY	GO_REGULATION_OF_TRANSPORTER_ACTIVITY		188	-0.410819	-1.80808	0.00209205	0.0376561	0.924	2041	tags=25%, list=11%, signal=28%
GO_HORMONE_BINDING	GO_HORMONE_BINDING		63	-0.492607	-1.80763	0	0.0377334	0.926	4127	tags=46%, list=22%, signal=59%
GO_ENDOTHELIUM_DEVELOPMENT	GO_ENDOTHELIUM_DEVELOPMENT		88	-0.496784	-1.80737	0.00831601	0.0377629	0.927	2722	tags=40%, list=15%, signal=46%
GO_POSITIVE_REGULATION_OF_NEURON_PROJECTION_DEVELOPMENT	GO_POSITIVE_REGULATION_OF_NEURON_PROJECTION_DEVELOPMENT		225	-0.429524	-1.805	0.00218341	0.0385906	0.928	3299	tags=36%, list=18%, signal=43%
GO_REGULATION_OF_AMINO_ACID_TRANSPORT	GO_REGULATION_OF_AMINO_ACID_TRANSPORT		25	-0.570231	-1.80483	0.00988142	0.0385477	0.928	4166	tags=48%, list=22%, signal=62%
GO_POSITIVE_REGULATION_OF_ENDOTHELIAL_CELL_MIGRATION	GO_POSITIVE_REGULATION_OF_ENDOTHELIAL_CELL_MIGRATION		65	-0.505212	-1.80423	0.00793651	0.0386975	0.928	4557	tags=62%, list=24%, signal=81%
GO_MIDDLE_EAR_MORPHOGENESIS	GO_MIDDLE_EAR_MORPHOGENESIS		20	-0.599141	-1.8041	0.00785855	0.038624	0.928	2741	tags=45%, list=15%, signal=53%
GO_CENTRAL_NERVOUS_SYSTEM_NEURON_DEVELOPMENT	GO_CENTRAL_NERVOUS_SYSTEM_NEURON_DEVELOPMENT		70	-0.485151	-1.80406	0.00612245	0.0385255	0.928	3272	tags=37%, list=17%, signal=45%
GO_METANEPHROS_MORPHOGENESIS	GO_METANEPHROS_MORPHOGENESIS		28	-0.56222	-1.80297	0.00200401	0.0387742	0.928	1132	tags=25%, list=6%, signal=27%
GO_REGULATION_OF_CIRCADIAN_SLEEP_WAKE_CYCLE	GO_REGULATION_OF_CIRCADIAN_SLEEP_WAKE_CYCLE		23	-0.614401	-1.80276	0	0.0387653	0.93	4739	tags=52%, list=25%, signal=70%
GO_AMINOGLYCAN_METABOLIC_PROCESS	GO_AMINOGLYCAN_METABOLIC_PROCESS		162	-0.440033	-1.80139	0.00408998	0.0391966	0.931	3786	tags=36%, list=20%, signal=45%
GO_CATION_CHANNEL_ACTIVITY	GO_CATION_CHANNEL_ACTIVITY		285	-0.450273	-1.8007	0.00205339	0.0393505	0.935	4585	tags=38%, list=25%, signal=49%
GO_REGULATION_OF_SENSORY_PERCEPTION	GO_REGULATION_OF_SENSORY_PERCEPTION		33	-0.541687	-1.79943	0	0.0397029	0.935	2657	tags=36%, list=14%, signal=42%
GO_REGULATION_OF_NOREPINEPHRINE_SECRETION	GO_REGULATION_OF_NOREPINEPHRINE_SECRETION		17	-0.644718	-1.79896	0.00404858	0.0397336	0.935	3770	tags=53%, list=20%, signal=66%
GO_NEUROPEPTIDE_RECEPTOR_ACTIVITY	GO_NEUROPEPTIDE_RECEPTOR_ACTIVITY		41	-0.568269	-1.79634	0.00202429	0.0406377	0.936	3187	tags=34%, list=17%, signal=41%
GO_CARDIAC_MYOFIBRIL_ASSEMBLY	GO_CARDIAC_MYOFIBRIL_ASSEMBLY		16	-0.67366	-1.79634	0.00811359	0.0405309	0.936	3093	tags=56%, list=17%, signal=67%
GO_REGULATION_OF_VASCULAR_ENDOTHELIAL_GROWTH_FACTOR_PRODUCTION	GO_REGULATION_OF_VASCULAR_ENDOTHELIAL_GROWTH_FACTOR_PRODUCTION		31	-0.567083	-1.79633	0.00814664	0.040419	0.936	3007	tags=45%, list=16%, signal=54%
GO_NEGATIVE_REGULATION_OF_OSSIFICATION	GO_NEGATIVE_REGULATION_OF_OSSIFICATION		64	-0.494414	-1.79631	0.00200401	0.0403293	0.936	3362	tags=42%, list=18%, signal=51%
GO_NEGATIVE_REGULATION_OF_CYTOKINE_PRODUCTION_INVOLVED_IN_IMMUNE_RESPONSE	GO_NEGATIVE_REGULATION_OF_CYTOKINE_PRODUCTION_INVOLVED_IN_IMMUNE_RESPONSE		19	-0.674164	-1.79514	0.0121212	0.0406296	0.937	3317	tags=42%, list=18%, signal=51%
GO_LOCOMOTORY_BEHAVIOR	GO_LOCOMOTORY_BEHAVIOR		176	-0.439797	-1.79439	0	0.0408373	0.938	3791	tags=34%, list=20%, signal=42%
GO_REGULATION_OF_SMOOTH_MUSCLE_CELL_MIGRATION	GO_REGULATION_OF_SMOOTH_MUSCLE_CELL_MIGRATION		49	-0.534604	-1.79328	0.00635593	0.0411125	0.939	3504	tags=47%, list=19%, signal=58%
GO_REGULATION_OF_SYSTEMIC_ARTERIAL_BLOOD_PRESSURE_MEDIATED_BY_A_CHEMICAL_SIGNAL	GO_REGULATION_OF_SYSTEMIC_ARTERIAL_BLOOD_PRESSURE_MEDIATED_BY_A_CHEMICAL_SIGNAL		45	-0.522961	-1.79284	0.00407332	0.0411527	0.941	4312	tags=49%, list=23%, signal=63%
GO_REGULATION_OF_EPITHELIAL_CELL_PROLIFERATION	GO_REGULATION_OF_EPITHELIAL_CELL_PROLIFERATION		275	-0.397889	-1.79192	0.0041841	0.0413515	0.942	3272	tags=32%, list=17%, signal=38%
GO_REGULATION_OF_SYSTEMIC_ARTERIAL_BLOOD_PRESSURE	GO_REGULATION_OF_SYSTEMIC_ARTERIAL_BLOOD_PRESSURE		82	-0.468315	-1.79185	0.0040404	0.0412596	0.942	4312	tags=45%, list=23%, signal=58%
GO_BONE_DEVELOPMENT	GO_BONE_DEVELOPMENT		150	-0.448341	-1.7914	0.00650759	0.0413194	0.942	4150	tags=42%, list=22%, signal=54%
GO_MEMBRANE_ASSEMBLY	GO_MEMBRANE_ASSEMBLY		25	-0.582151	-1.79027	0.00961539	0.0416583	0.944	3371	tags=48%, list=18%, signal=58%
GO_CELLULAR_EXTRAVASATION	GO_CELLULAR_EXTRAVASATION		24	-0.641305	-1.79023	0.0135659	0.0415652	0.944	4401	tags=75%, list=24%, signal=98%
GO_EYE_DEVELOPMENT	GO_EYE_DEVELOPMENT		316	-0.396471	-1.79018	0	0.0414851	0.944	2337	tags=23%, list=12%, signal=26%
GO_FOREBRAIN_NEURON_DEVELOPMENT	GO_FOREBRAIN_NEURON_DEVELOPMENT		34	-0.537452	-1.78808	0.00407332	0.0422822	0.947	2697	tags=32%, list=14%, signal=38%
GO_GOLGI_LUMEN	GO_GOLGI_LUMEN		84	-0.464104	-1.78791	0.00208768	0.0422157	0.947	2375	tags=24%, list=13%, signal=27%
GO_SENSORY_ORGAN_DEVELOPMENT	GO_SENSORY_ORGAN_DEVELOPMENT		478	-0.384126	-1.78751	0	0.0422676	0.947	2881	tags=25%, list=15%, signal=29%
GO_TRANSMISSION_OF_NERVE_IMPULSE	GO_TRANSMISSION_OF_NERVE_IMPULSE		53	-0.539872	-1.78715	0.00211416	0.0423051	0.947	3071	tags=30%, list=16%, signal=36%
GO_REGULATION_OF_RECEPTOR_INTERNALIZATION	GO_REGULATION_OF_RECEPTOR_INTERNALIZATION		37	-0.496527	-1.78703	0.00609756	0.0422391	0.947	3172	tags=38%, list=17%, signal=45%
GO_REGULATION_OF_NEURON_PROJECTION_DEVELOPMENT	GO_REGULATION_OF_NEURON_PROJECTION_DEVELOPMENT		395	-0.404612	-1.78693	0	0.0421614	0.947	3434	tags=36%, list=18%, signal=43%
GO_GLYCOPROTEIN_COMPLEX	GO_GLYCOPROTEIN_COMPLEX		21	-0.644806	-1.78665	0.015625	0.0421517	0.948	2590	tags=57%, list=14%, signal=66%
GO_HEAD_MORPHOGENESIS	GO_HEAD_MORPHOGENESIS		35	-0.538833	-1.78661	0.0105263	0.0420475	0.948	3169	tags=40%, list=17%, signal=48%
GO_POSITIVE_REGULATION_OF_BLOOD_CIRCULATION	GO_POSITIVE_REGULATION_OF_BLOOD_CIRCULATION		90	-0.462976	-1.78591	0	0.0421873	0.948	3770	tags=42%, list=20%, signal=53%
GO_CELLULAR_RESPONSE_TO_VITAMIN	GO_CELLULAR_RESPONSE_TO_VITAMIN		26	-0.566237	-1.78517	0.00829876	0.0423519	0.949	2957	tags=50%, list=16%, signal=59%
GO_CHONDROITIN_SULFATE_PROTEOGLYCAN_BIOSYNTHETIC_PROCESS	GO_CHONDROITIN_SULFATE_PROTEOGLYCAN_BIOSYNTHETIC_PROCESS		29	-0.59613	-1.78514	0.0105485	0.042253	0.949	3661	tags=52%, list=20%, signal=64%
GO_REGULATION_OF_NEUROTRANSMITTER_TRANSPORT	GO_REGULATION_OF_NEUROTRANSMITTER_TRANSPORT		58	-0.518784	-1.78456	0.0040404	0.0423803	0.95	3549	tags=38%, list=19%, signal=47%
GO_POSITIVE_REGULATION_OF_BMP_SIGNALING_PATHWAY	GO_POSITIVE_REGULATION_OF_BMP_SIGNALING_PATHWAY		30	-0.535809	-1.78435	0.00400802	0.0423729	0.95	1962	tags=33%, list=10%, signal=37%
GO_REGULATION_OF_ACTIN_FILAMENT_BUNDLE_ASSEMBLY	GO_REGULATION_OF_ACTIN_FILAMENT_BUNDLE_ASSEMBLY		73	-0.450985	-1.78431	0.00421053	0.0422715	0.95	2346	tags=32%, list=13%, signal=36%
GO_ORGAN_FORMATION	GO_ORGAN_FORMATION		34	-0.531605	-1.78356	0.00208333	0.0424574	0.95	1967	tags=32%, list=11%, signal=36%
GO_POSITIVE_REGULATION_OF_VASCULAR_ENDOTHELIAL_GROWTH_FACTOR_PRODUCTION	GO_POSITIVE_REGULATION_OF_VASCULAR_ENDOTHELIAL_GROWTH_FACTOR_PRODUCTION		26	-0.577711	-1.78308	0.00416667	0.0425201	0.951	2876	tags=42%, list=15%, signal=50%
GO_NEGATIVE_CHEMOTAXIS	GO_NEGATIVE_CHEMOTAXIS		39	-0.534892	-1.78306	0.012605	0.0424289	0.951	3415	tags=41%, list=18%, signal=50%
GO_REGULATION_OF_OSTEOBLAST_PROLIFERATION	GO_REGULATION_OF_OSTEOBLAST_PROLIFERATION		22	-0.588114	-1.78304	0.00204499	0.0423303	0.951	2289	tags=41%, list=12%, signal=47%
GO_SINGLE_ORGANISM_CELL_ADHESION	GO_SINGLE_ORGANISM_CELL_ADHESION		434	-0.409166	-1.7821	0.00401606	0.042602	0.951	3712	tags=37%, list=20%, signal=45%
GO_REGULATION_OF_ADHERENS_JUNCTION_ORGANIZATION	GO_REGULATION_OF_ADHERENS_JUNCTION_ORGANIZATION		49	-0.529403	-1.78186	0.0124224	0.0425992	0.951	2375	tags=41%, list=13%, signal=47%
GO_POSITIVE_REGULATION_OF_ERK1_AND_ERK2_CASCADE	GO_POSITIVE_REGULATION_OF_ERK1_AND_ERK2_CASCADE		161	-0.442759	-1.78173	0	0.0425418	0.951	3007	tags=32%, list=16%, signal=37%
GO_GLIAL_CELL_MIGRATION	GO_GLIAL_CELL_MIGRATION		35	-0.558777	-1.78037	0.00865801	0.0429569	0.952	2913	tags=49%, list=16%, signal=57%
GO_ARTERY_MORPHOGENESIS	GO_ARTERY_MORPHOGENESIS		51	-0.521158	-1.77996	0.0041841	0.043008	0.952	2722	tags=31%, list=15%, signal=37%
GO_STRIATED_MUSCLE_CELL_DIFFERENTIATION	GO_STRIATED_MUSCLE_CELL_DIFFERENTIATION		163	-0.434706	-1.77853	0.00809717	0.0434926	0.952	3191	tags=33%, list=17%, signal=39%
GO_POSITIVE_REGULATION_OF_MAPK_CASCADE	GO_POSITIVE_REGULATION_OF_MAPK_CASCADE		449	-0.387304	-1.77787	0	0.0436182	0.952	3280	tags=30%, list=18%, signal=36%
GO_REGULATION_OF_MEMBRANE_DEPOLARIZATION	GO_REGULATION_OF_MEMBRANE_DEPOLARIZATION		39	-0.488235	-1.77723	0	0.0437817	0.952	2470	tags=33%, list=13%, signal=38%
GO_GLYCOPROTEIN_BINDING	GO_GLYCOPROTEIN_BINDING		98	-0.44242	-1.77707	0.00819672	0.0437319	0.952	2359	tags=31%, list=13%, signal=35%
GO_AXON_EXTENSION	GO_AXON_EXTENSION		36	-0.575162	-1.7766	0.0164948	0.043844	0.952	2697	tags=47%, list=14%, signal=55%
GO_STRIATED_MUSCLE_CONTRACTION	GO_STRIATED_MUSCLE_CONTRACTION		95	-0.436341	-1.77651	0.00845666	0.0437835	0.952	2826	tags=36%, list=15%, signal=42%
GO_REGULATION_OF_CALCINEURIN_NFAT_SIGNALING_CASCADE	GO_REGULATION_OF_CALCINEURIN_NFAT_SIGNALING_CASCADE		16	-0.61219	-1.77584	0.0078125	0.0439057	0.953	1836	tags=44%, list=10%, signal=48%
GO_REGULATION_OF_HEART_RATE	GO_REGULATION_OF_HEART_RATE		83	-0.466991	-1.77431	0.0176125	0.044485	0.953	4127	tags=47%, list=22%, signal=60%
GO_RENAL_TUBULE_DEVELOPMENT	GO_RENAL_TUBULE_DEVELOPMENT		78	-0.468611	-1.77334	0.00407332	0.0448516	0.953	3188	tags=32%, list=17%, signal=38%
GO_POSITIVE_REGULATION_OF_TYROSINE_PHOSPHORYLATION_OF_STAT5_PROTEIN	GO_POSITIVE_REGULATION_OF_TYROSINE_PHOSPHORYLATION_OF_STAT5_PROTEIN		15	-0.670384	-1.7733	0.0059761	0.0447568	0.953	3125	tags=47%, list=17%, signal=56%
GO_G_PROTEIN_COUPLED_AMINE_RECEPTOR_ACTIVITY	GO_G_PROTEIN_COUPLED_AMINE_RECEPTOR_ACTIVITY		41	-0.547271	-1.7732	0.00400802	0.0446708	0.953	2429	tags=24%, list=13%, signal=28%
GO_POSITIVE_REGULATION_OF_AMINE_TRANSPORT	GO_POSITIVE_REGULATION_OF_AMINE_TRANSPORT		31	-0.581006	-1.7719	0.00595238	0.0451242	0.955	4657	tags=52%, list=25%, signal=69%
GO_REGULATION_OF_RESPIRATORY_GASEOUS_EXCHANGE	GO_REGULATION_OF_RESPIRATORY_GASEOUS_EXCHANGE		22	-0.607015	-1.77158	0.0105263	0.0451432	0.955	2218	tags=45%, list=12%, signal=52%
GO_REGULATION_OF_CARDIAC_MUSCLE_TISSUE_DEVELOPMENT	GO_REGULATION_OF_CARDIAC_MUSCLE_TISSUE_DEVELOPMENT		47	-0.49156	-1.77143	0.0100402	0.0450872	0.956	3109	tags=38%, list=17%, signal=46%
GO_NEGATIVE_REGULATION_OF_CHONDROCYTE_DIFFERENTIATION	GO_NEGATIVE_REGULATION_OF_CHONDROCYTE_DIFFERENTIATION		17	-0.658046	-1.77093	0.00627615	0.0451775	0.956	2446	tags=59%, list=13%, signal=68%
GO_REGULATION_OF_CARDIAC_MUSCLE_CONTRACTION_BY_REGULATION_OF_THE_RELEASE_OF_SEQUESTERED_CALCIUM_ION	GO_REGULATION_OF_CARDIAC_MUSCLE_CONTRACTION_BY_REGULATION_OF_THE_RELEASE_OF_SEQUESTERED_CALCIUM_ION		19	-0.677534	-1.7708	0.0183673	0.0451336	0.956	1431	tags=47%, list=8%, signal=51%
GO_REGULATION_OF_EPITHELIAL_TO_MESENCHYMAL_TRANSITION	GO_REGULATION_OF_EPITHELIAL_TO_MESENCHYMAL_TRANSITION		64	-0.464769	-1.76991	0.00423729	0.045373	0.958	2610	tags=34%, list=14%, signal=40%
GO_COMPLEX_OF_COLLAGEN_TRIMERS	GO_COMPLEX_OF_COLLAGEN_TRIMERS		23	-0.775547	-1.76989	0.0107991	0.0452698	0.958	2337	tags=70%, list=12%, signal=79%
GO_LONG_TERM_SYNAPTIC_POTENTIATION	GO_LONG_TERM_SYNAPTIC_POTENTIATION		39	-0.505105	-1.76974	0.0102041	0.0452398	0.96	3650	tags=51%, list=20%, signal=64%
GO_OSSIFICATION	GO_OSSIFICATION		245	-0.400847	-1.76913	0.00431965	0.0453666	0.96	2669	tags=29%, list=14%, signal=34%
GO_METANEPHROS_DEVELOPMENT	GO_METANEPHROS_DEVELOPMENT		81	-0.47248	-1.76873	0.00603622	0.0454299	0.961	3089	tags=31%, list=17%, signal=37%
GO_REGULATION_OF_CORTICOSTEROID_HORMONE_SECRETION	GO_REGULATION_OF_CORTICOSTEROID_HORMONE_SECRETION		15	-0.649435	-1.76852	0.0163599	0.0453977	0.961	3770	tags=53%, list=20%, signal=67%
GO_POTASSIUM_CHANNEL_ACTIVITY	GO_POTASSIUM_CHANNEL_ACTIVITY		116	-0.479604	-1.7678	0.00422833	0.0455835	0.962	4350	tags=40%, list=23%, signal=51%
GO_RESPONSE_TO_MECHANICAL_STIMULUS	GO_RESPONSE_TO_MECHANICAL_STIMULUS		206	-0.388678	-1.76707	0.00204499	0.0457439	0.962	3289	tags=32%, list=18%, signal=38%
GO_SMAD_PROTEIN_SIGNAL_TRANSDUCTION	GO_SMAD_PROTEIN_SIGNAL_TRANSDUCTION		52	-0.49842	-1.76684	0.00408998	0.0457568	0.962	3258	tags=38%, list=17%, signal=46%
GO_NEGATIVE_REGULATION_OF_MUSCLE_CONTRACTION	GO_NEGATIVE_REGULATION_OF_MUSCLE_CONTRACTION		21	-0.57724	-1.76666	0.0039604	0.0457254	0.962	1663	tags=38%, list=9%, signal=42%
GO_SYNAPSE_ORGANIZATION	GO_SYNAPSE_ORGANIZATION		143	-0.473905	-1.76571	0.00607287	0.0459943	0.963	3015	tags=35%, list=16%, signal=41%
GO_PHASIC_SMOOTH_MUSCLE_CONTRACTION	GO_PHASIC_SMOOTH_MUSCLE_CONTRACTION		16	-0.637108	-1.76535	0.00196464	0.0460258	0.963	2888	tags=44%, list=15%, signal=52%
GO_INNERVATION	GO_INNERVATION		23	-0.607661	-1.76515	0.0100604	0.0460118	0.963	3598	tags=48%, list=19%, signal=59%
GO_ESTROUS_CYCLE	GO_ESTROUS_CYCLE		19	-0.605407	-1.76419	0	0.046398	0.963	4145	tags=58%, list=22%, signal=74%
GO_EXTRACELLULAR_MATRIX_BINDING	GO_EXTRACELLULAR_MATRIX_BINDING		48	-0.54452	-1.76406	0.00831601	0.0463399	0.963	2300	tags=40%, list=12%, signal=45%
GO_POSITIVE_REGULATION_OF_EPITHELIAL_CELL_PROLIFERATION	GO_POSITIVE_REGULATION_OF_EPITHELIAL_CELL_PROLIFERATION		148	-0.434614	-1.76393	0.00424628	0.0462765	0.963	3272	tags=36%, list=17%, signal=44%
GO_ADULT_BEHAVIOR	GO_ADULT_BEHAVIOR		133	-0.452619	-1.76327	0.00619835	0.0464147	0.964	3712	tags=34%, list=20%, signal=42%
GO_CENTRAL_NERVOUS_SYSTEM_NEURON_AXONOGENESIS	GO_CENTRAL_NERVOUS_SYSTEM_NEURON_AXONOGENESIS		27	-0.564849	-1.7627	0.0204918	0.0465787	0.965	3244	tags=44%, list=17%, signal=54%
GO_RESPONSE_TO_TRANSFORMING_GROWTH_FACTOR_BETA	GO_RESPONSE_TO_TRANSFORMING_GROWTH_FACTOR_BETA		142	-0.418774	-1.7612	0.00209644	0.0471178	0.965	2679	tags=32%, list=14%, signal=37%
GO_MESONEPHRIC_TUBULE_MORPHOGENESIS	GO_MESONEPHRIC_TUBULE_MORPHOGENESIS		53	-0.506221	-1.76101	0.00420168	0.0471115	0.965	2476	tags=30%, list=13%, signal=35%
GO_G_PROTEIN_COUPLED_PURINERGIC_RECEPTOR_SIGNALING_PATHWAY	GO_G_PROTEIN_COUPLED_PURINERGIC_RECEPTOR_SIGNALING_PATHWAY		19	-0.647822	-1.76077	0.0185185	0.0470948	0.965	3752	tags=58%, list=20%, signal=72%
GO_POSITIVE_REGULATION_OF_ACUTE_INFLAMMATORY_RESPONSE	GO_POSITIVE_REGULATION_OF_ACUTE_INFLAMMATORY_RESPONSE		28	-0.56364	-1.76075	0.0152381	0.0469975	0.965	4043	tags=57%, list=22%, signal=73%
GO_POSITIVE_REGULATION_OF_RESPONSE_TO_EXTERNAL_STIMULUS	GO_POSITIVE_REGULATION_OF_RESPONSE_TO_EXTERNAL_STIMULUS		290	-0.417552	-1.76062	0.011976	0.0469451	0.965	4316	tags=41%, list=23%, signal=53%
GO_MYOTUBE_DIFFERENTIATION	GO_MYOTUBE_DIFFERENTIATION		50	-0.486356	-1.75906	0	0.0474783	0.967	3169	tags=30%, list=17%, signal=36%
GO_INOSITOL_LIPID_MEDIATED_SIGNALING	GO_INOSITOL_LIPID_MEDIATED_SIGNALING		115	-0.418568	-1.7585	0	0.0475957	0.968	3028	tags=32%, list=16%, signal=38%
GO_NEUROMUSCULAR_PROCESS	GO_NEUROMUSCULAR_PROCESS		94	-0.438148	-1.75761	0	0.0478549	0.968	4080	tags=38%, list=22%, signal=49%
GO_DEVELOPMENTAL_GROWTH_INVOLVED_IN_MORPHOGENESIS	GO_DEVELOPMENTAL_GROWTH_INVOLVED_IN_MORPHOGENESIS		103	-0.459624	-1.75744	0.0122951	0.0478289	0.968	2697	tags=34%, list=14%, signal=39%
GO_ASTROCYTE_DEVELOPMENT	GO_ASTROCYTE_DEVELOPMENT		19	-0.595064	-1.75701	0.012605	0.0478982	0.968	1869	tags=37%, list=10%, signal=41%
GO_REGULATION_OF_CELL_MORPHOGENESIS_INVOLVED_IN_DIFFERENTIATION	GO_REGULATION_OF_CELL_MORPHOGENESIS_INVOLVED_IN_DIFFERENTIATION		325	-0.394304	-1.75701	0.0021645	0.0477896	0.968	3434	tags=34%, list=18%, signal=41%
GO_PLASMA_MEMBRANE_RAFT	GO_PLASMA_MEMBRANE_RAFT		83	-0.457333	-1.75657	0.00785855	0.0478834	0.968	3461	tags=43%, list=18%, signal=53%
GO_CELL_CELL_SIGNALING_INVOLVED_IN_CARDIAC_CONDUCTION	GO_CELL_CELL_SIGNALING_INVOLVED_IN_CARDIAC_CONDUCTION		21	-0.61965	-1.75627	0.0222222	0.0479343	0.968	2600	tags=52%, list=14%, signal=61%
GO_CARDIAC_MUSCLE_CELL_CONTRACTION	GO_CARDIAC_MUSCLE_CELL_CONTRACTION		28	-0.577772	-1.75558	0.0162602	0.0481374	0.969	2600	tags=54%, list=14%, signal=62%
GO_RECEPTOR_COMPLEX	GO_RECEPTOR_COMPLEX		322	-0.394984	-1.75376	0	0.0488262	0.97	4075	tags=36%, list=22%, signal=45%
GO_NEURONAL_POSTSYNAPTIC_DENSITY	GO_NEURONAL_POSTSYNAPTIC_DENSITY		51	-0.515925	-1.75333	0.0123711	0.0488815	0.97	2340	tags=39%, list=13%, signal=45%
GO_PALATE_DEVELOPMENT	GO_PALATE_DEVELOPMENT		85	-0.451171	-1.753	0.00200401	0.0489343	0.97	3272	tags=38%, list=17%, signal=45%
GO_MEMORY	GO_MEMORY		95	-0.433334	-1.75235	0.00203666	0.0490631	0.97	3479	tags=38%, list=19%, signal=46%
GO_REGULATION_OF_NEUROTRANSMITTER_SECRETION	GO_REGULATION_OF_NEUROTRANSMITTER_SECRETION		45	-0.508771	-1.75191	0.0104822	0.0491438	0.971	3549	tags=38%, list=19%, signal=47%
GO_HETEROTYPIC_CELL_CELL_ADHESION	GO_HETEROTYPIC_CELL_CELL_ADHESION		27	-0.579301	-1.75122	0.0202429	0.0493496	0.972	3632	tags=59%, list=19%, signal=73%
GO_REGULATION_OF_ACUTE_INFLAMMATORY_RESPONSE	GO_REGULATION_OF_ACUTE_INFLAMMATORY_RESPONSE		71	-0.486486	-1.75089	0.0121457	0.0493784	0.972	4043	tags=48%, list=22%, signal=61%
GO_OLFACTORY_BULB_INTERNEURON_DIFFERENTIATION	GO_OLFACTORY_BULB_INTERNEURON_DIFFERENTIATION		15	-0.642556	-1.75039	0.0105708	0.0495338	0.973	817	tags=27%, list=4%, signal=28%
GO_ENDOPLASMIC_RETICULUM_LUMEN	GO_ENDOPLASMIC_RETICULUM_LUMEN		190	-0.436267	-1.75033	0.0160321	0.049433	0.973	3077	tags=32%, list=16%, signal=38%
GO_CALCIUM_DEPENDENT_CELL_CELL_ADHESION_VIA_PLASMA_MEMBRANE_CELL_ADHESION_MOLECULES	GO_CALCIUM_DEPENDENT_CELL_CELL_ADHESION_VIA_PLASMA_MEMBRANE_CELL_ADHESION_MOLECULES		26	-0.605471	-1.75031	0.0227273	0.0493366	0.973	3856	tags=50%, list=21%, signal=63%
GO_NEGATIVE_REGULATION_OF_LEUKOCYTE_MIGRATION	GO_NEGATIVE_REGULATION_OF_LEUKOCYTE_MIGRATION		30	-0.527139	-1.75024	0.00396825	0.0492706	0.973	4379	tags=47%, list=23%, signal=61%
GO_CALCIUM_ION_TRANSMEMBRANE_TRANSPORT	GO_CALCIUM_ION_TRANSMEMBRANE_TRANSPORT		151	-0.436172	-1.74989	0.0040404	0.0493176	0.973	3836	tags=34%, list=21%, signal=43%
GO_REGULATION_OF_MORPHOGENESIS_OF_A_BRANCHING_STRUCTURE	GO_REGULATION_OF_MORPHOGENESIS_OF_A_BRANCHING_STRUCTURE		53	-0.484898	-1.74925	0.00393701	0.049513	0.973	2446	tags=34%, list=13%, signal=39%
GO_REGULATION_OF_SMOOTH_MUSCLE_CELL_DIFFERENTIATION	GO_REGULATION_OF_SMOOTH_MUSCLE_CELL_DIFFERENTIATION		19	-0.623837	-1.74846	0.016129	0.0497202	0.973	1285	tags=37%, list=7%, signal=40%
GO_PROSTATE_GLAND_MORPHOGENESIS	GO_PROSTATE_GLAND_MORPHOGENESIS		23	-0.569781	-1.74837	0.00994036	0.0496503	0.973	2309	tags=39%, list=12%, signal=45%
GO_REGULATION_OF_CELL_JUNCTION_ASSEMBLY	GO_REGULATION_OF_CELL_JUNCTION_ASSEMBLY		67	-0.487007	-1.7483	0.0164609	0.0495687	0.973	2470	tags=36%, list=13%, signal=41%
GO_CENTRAL_NERVOUS_SYSTEM_PROJECTION_NEURON_AXONOGENESIS	GO_CENTRAL_NERVOUS_SYSTEM_PROJECTION_NEURON_AXONOGENESIS		22	-0.581787	-1.74743	0.0159681	0.0498679	0.973	3244	tags=45%, list=17%, signal=55%
GO_EXTERNAL_SIDE_OF_PLASMA_MEMBRANE	GO_EXTERNAL_SIDE_OF_PLASMA_MEMBRANE		207	-0.474075	-1.74737	0.0216963	0.0497813	0.974	4353	tags=43%, list=23%, signal=56%
GO_NEURON_PROJECTION_MEMBRANE	GO_NEURON_PROJECTION_MEMBRANE		34	-0.533775	-1.74646	0.0021097	0.0501185	0.974	3131	tags=35%, list=17%, signal=42%
GO_REGULATION_OF_MULTICELLULAR_ORGANISMAL_METABOLIC_PROCESS	GO_REGULATION_OF_MULTICELLULAR_ORGANISMAL_METABOLIC_PROCESS		35	-0.51328	-1.74611	0.0167015	0.0501721	0.974	2277	tags=34%, list=12%, signal=39%
GO_CARDIAC_CHAMBER_MORPHOGENESIS	GO_CARDIAC_CHAMBER_MORPHOGENESIS		101	-0.433915	-1.7455	0.00409836	0.0503285	0.975	1487	tags=22%, list=8%, signal=24%
GO_POSITIVE_REGULATION_OF_SMOOTH_MUSCLE_CELL_MIGRATION	GO_POSITIVE_REGULATION_OF_SMOOTH_MUSCLE_CELL_MIGRATION		30	-0.565227	-1.74352	0.0161616	0.0510806	0.976	3504	tags=50%, list=19%, signal=61%
GO_POSITIVE_REGULATION_OF_STRIATED_MUSCLE_CELL_DIFFERENTIATION	GO_POSITIVE_REGULATION_OF_STRIATED_MUSCLE_CELL_DIFFERENTIATION		50	-0.46761	-1.74327	0	0.0510752	0.976	2595	tags=26%, list=14%, signal=30%
GO_CELL_CELL_CONTACT_ZONE	GO_CELL_CELL_CONTACT_ZONE		64	-0.468619	-1.74241	0.013834	0.0513837	0.976	2574	tags=36%, list=14%, signal=42%
GO_VASCULOGENESIS	GO_VASCULOGENESIS		57	-0.511779	-1.74199	0.0163934	0.0514745	0.977	2847	tags=39%, list=15%, signal=45%
GO_REGULATION_OF_ERK1_AND_ERK2_CASCADE	GO_REGULATION_OF_ERK1_AND_ERK2_CASCADE		227	-0.401611	-1.7407	0.00398406	0.0519841	0.978	2913	tags=29%, list=16%, signal=34%
GO_CELLULAR_RESPONSE_TO_VASCULAR_ENDOTHELIAL_GROWTH_FACTOR_STIMULUS	GO_CELLULAR_RESPONSE_TO_VASCULAR_ENDOTHELIAL_GROWTH_FACTOR_STIMULUS		29	-0.597151	-1.7401	0.0222672	0.0521597	0.979	3114	tags=52%, list=17%, signal=62%
GO_NEGATIVE_REGULATION_OF_RESPONSE_TO_WOUNDING	GO_NEGATIVE_REGULATION_OF_RESPONSE_TO_WOUNDING		147	-0.444595	-1.73992	0	0.052165	0.979	3251	tags=31%, list=17%, signal=38%
GO_ENDOTHELIAL_CELL_DIFFERENTIATION	GO_ENDOTHELIAL_CELL_DIFFERENTIATION		70	-0.484034	-1.73904	0.0105485	0.0524418	0.98	2722	tags=39%, list=15%, signal=45%
GO_REGULATION_OF_POTASSIUM_ION_TRANSPORT	GO_REGULATION_OF_POTASSIUM_ION_TRANSPORT		81	-0.453972	-1.73711	0.0102041	0.0532054	0.98	2041	tags=30%, list=11%, signal=33%
GO_REGULATION_OF_CARDIAC_MUSCLE_CELL_MEMBRANE_REPOLARIZATION	GO_REGULATION_OF_CARDIAC_MUSCLE_CELL_MEMBRANE_REPOLARIZATION		20	-0.599287	-1.73645	0.0201207	0.0534097	0.981	2590	tags=50%, list=14%, signal=58%
GO_DEVELOPMENTAL_CELL_GROWTH	GO_DEVELOPMENTAL_CELL_GROWTH		75	-0.458504	-1.73523	0.0209205	0.05388	0.981	2697	tags=35%, list=14%, signal=40%
GO_TRANSFORMING_GROWTH_FACTOR_BETA_RECEPTOR_BINDING	GO_TRANSFORMING_GROWTH_FACTOR_BETA_RECEPTOR_BINDING		46	-0.488951	-1.73516	0.0040404	0.0538037	0.981	3258	tags=39%, list=17%, signal=47%
GO_VASODILATION	GO_VASODILATION		26	-0.555137	-1.73467	0.00616016	0.0538934	0.981	1492	tags=31%, list=8%, signal=33%
GO_PURINERGIC_RECEPTOR_SIGNALING_PATHWAY	GO_PURINERGIC_RECEPTOR_SIGNALING_PATHWAY		27	-0.598128	-1.73457	0.0277778	0.0538376	0.981	4397	tags=52%, list=24%, signal=68%
GO_REGULATION_OF_CELL_SHAPE	GO_REGULATION_OF_CELL_SHAPE		135	-0.41967	-1.73412	0.00821355	0.0539201	0.981	2508	tags=30%, list=13%, signal=35%
GO_CARDIOCYTE_DIFFERENTIATION	GO_CARDIOCYTE_DIFFERENTIATION		93	-0.433362	-1.73336	0.00403226	0.0541817	0.982	2826	tags=31%, list=15%, signal=37%
GO_NEURAL_CREST_CELL_DIFFERENTIATION	GO_NEURAL_CREST_CELL_DIFFERENTIATION		74	-0.466377	-1.73256	0.00204499	0.0544416	0.983	3106	tags=34%, list=17%, signal=40%
GO_NEGATIVE_REGULATION_OF_NUCLEOTIDE_METABOLIC_PROCESS	GO_NEGATIVE_REGULATION_OF_NUCLEOTIDE_METABOLIC_PROCESS		61	-0.452831	-1.7324	0.00407332	0.0544022	0.983	3650	tags=34%, list=20%, signal=43%
GO_TRABECULA_FORMATION	GO_TRABECULA_FORMATION		22	-0.589785	-1.73239	0.0162933	0.0542898	0.983	2826	tags=41%, list=15%, signal=48%
GO_BRANCHING_MORPHOGENESIS_OF_AN_EPITHELIAL_TUBE	GO_BRANCHING_MORPHOGENESIS_OF_AN_EPITHELIAL_TUBE		130	-0.437276	-1.73196	0.0120724	0.0543843	0.983	2610	tags=32%, list=14%, signal=36%
GO_LYMPH_VESSEL_DEVELOPMENT	GO_LYMPH_VESSEL_DEVELOPMENT		20	-0.62347	-1.73171	0.0225873	0.0543961	0.983	2655	tags=55%, list=14%, signal=64%
GO_NEUROMUSCULAR_SYNAPTIC_TRANSMISSION	GO_NEUROMUSCULAR_SYNAPTIC_TRANSMISSION		26	-0.556597	-1.73154	0.0121457	0.0543701	0.983	3051	tags=27%, list=16%, signal=32%
GO_REGULATION_OF_HEART_RATE_BY_CARDIAC_CONDUCTION	GO_REGULATION_OF_HEART_RATE_BY_CARDIAC_CONDUCTION		29	-0.544553	-1.73117	0.0214844	0.0544527	0.983	1947	tags=41%, list=10%, signal=46%
GO_CALCIUM_ION_IMPORT	GO_CALCIUM_ION_IMPORT		61	-0.461851	-1.72852	0.012474	0.0554875	0.985	3104	tags=34%, list=17%, signal=41%
GO_EXCITATORY_SYNAPSE	GO_EXCITATORY_SYNAPSE		191	-0.417905	-1.72827	0.0108696	0.0554945	0.986	3486	tags=37%, list=19%, signal=45%
GO_HEART_MORPHOGENESIS	GO_HEART_MORPHOGENESIS		208	-0.408445	-1.72819	0.00414079	0.0554188	0.986	3541	tags=34%, list=19%, signal=42%
GO_VOLTAGE_GATED_CATION_CHANNEL_ACTIVITY	GO_VOLTAGE_GATED_CATION_CHANNEL_ACTIVITY		130	-0.470798	-1.72761	0.0102459	0.0555937	0.987	4732	tags=42%, list=25%, signal=55%
GO_NEGATIVE_REGULATION_OF_G_PROTEIN_COUPLED_RECEPTOR_PROTEIN_SIGNALING_PATHWAY	GO_NEGATIVE_REGULATION_OF_G_PROTEIN_COUPLED_RECEPTOR_PROTEIN_SIGNALING_PATHWAY		38	-0.501185	-1.72734	0.0121704	0.0555943	0.987	2753	tags=32%, list=15%, signal=37%
GO_POSITIVE_REGULATION_OF_BLOOD_VESSEL_ENDOTHELIAL_CELL_MIGRATION	GO_POSITIVE_REGULATION_OF_BLOOD_VESSEL_ENDOTHELIAL_CELL_MIGRATION		25	-0.588993	-1.72708	0.0141414	0.0556082	0.987	1752	tags=36%, list=9%, signal=40%
GO_POSITIVE_REGULATION_OF_SMOOTH_MUSCLE_CONTRACTION	GO_POSITIVE_REGULATION_OF_SMOOTH_MUSCLE_CONTRACTION		29	-0.533045	-1.72543	0.00390625	0.0563461	0.987	4043	tags=48%, list=22%, signal=61%
GO_ATRIAL_SEPTUM_DEVELOPMENT	GO_ATRIAL_SEPTUM_DEVELOPMENT		17	-0.613314	-1.72501	0.0159681	0.0564422	0.987	4230	tags=65%, list=23%, signal=84%
GO_POSITIVE_REGULATION_OF_PEPTIDYL_TYROSINE_PHOSPHORYLATION	GO_POSITIVE_REGULATION_OF_PEPTIDYL_TYROSINE_PHOSPHORYLATION		155	-0.407761	-1.725	0.00419287	0.0563287	0.987	3492	tags=31%, list=19%, signal=38%
GO_NEURON_MIGRATION	GO_NEURON_MIGRATION		106	-0.439518	-1.72484	0.00610998	0.0563043	0.987	2881	tags=34%, list=15%, signal=40%
GO_GATED_CHANNEL_ACTIVITY	GO_GATED_CHANNEL_ACTIVITY		316	-0.422165	-1.72447	0.00408163	0.056396	0.987	4604	tags=37%, list=25%, signal=49%
GO_POSITIVE_REGULATION_OF_ION_TRANSPORT	GO_POSITIVE_REGULATION_OF_ION_TRANSPORT		228	-0.385078	-1.7234	0.00414079	0.0567767	0.987	3225	tags=29%, list=17%, signal=34%
GO_NEGATIVE_REGULATION_OF_SMOOTH_MUSCLE_CONTRACTION	GO_NEGATIVE_REGULATION_OF_SMOOTH_MUSCLE_CONTRACTION		15	-0.638214	-1.72321	0.0162602	0.0567475	0.987	1663	tags=40%, list=9%, signal=44%
GO_EAR_DEVELOPMENT	GO_EAR_DEVELOPMENT		191	-0.388049	-1.72319	0.00410678	0.0566501	0.987	2881	tags=25%, list=15%, signal=29%
GO_IMMUNOGLOBULIN_BINDING	GO_IMMUNOGLOBULIN_BINDING		20	-0.656829	-1.72302	0.0239044	0.056609	0.987	4031	tags=65%, list=22%, signal=83%
GO_SKELETAL_MUSCLE_ORGAN_DEVELOPMENT	GO_SKELETAL_MUSCLE_ORGAN_DEVELOPMENT		126	-0.415225	-1.72276	0.00401606	0.0566083	0.987	3951	tags=37%, list=21%, signal=46%
GO_SECONDARY_METABOLITE_BIOSYNTHETIC_PROCESS	GO_SECONDARY_METABOLITE_BIOSYNTHETIC_PROCESS		20	-0.576118	-1.72251	0.0138067	0.0566021	0.987	2541	tags=35%, list=14%, signal=40%
GO_PLASMA_MEMBRANE_PROTEIN_COMPLEX	GO_PLASMA_MEMBRANE_PROTEIN_COMPLEX		499	-0.38141	-1.72222	0.00203666	0.0566399	0.988	4096	tags=34%, list=22%, signal=43%
GO_WOUND_HEALING	GO_WOUND_HEALING		439	-0.37528	-1.72146	0	0.0569287	0.989	2657	tags=25%, list=14%, signal=29%
GO_CAMP_BIOSYNTHETIC_PROCESS	GO_CAMP_BIOSYNTHETIC_PROCESS		17	-0.640852	-1.72144	0.0102459	0.0568263	0.989	1482	tags=35%, list=8%, signal=38%
GO_RESPONSE_TO_PAIN	GO_RESPONSE_TO_PAIN		29	-0.551682	-1.72094	0.00801603	0.0569808	0.989	2346	tags=31%, list=13%, signal=35%
GO_POSITIVE_REGULATION_OF_SEQUESTERING_OF_CALCIUM_ION	GO_POSITIVE_REGULATION_OF_SEQUESTERING_OF_CALCIUM_ION		16	-0.59693	-1.7208	0.0201207	0.0569459	0.989	3706	tags=50%, list=20%, signal=62%
GO_EPITHELIAL_CELL_MORPHOGENESIS	GO_EPITHELIAL_CELL_MORPHOGENESIS		42	-0.475266	-1.71955	0.00992064	0.0574618	0.989	2823	tags=43%, list=15%, signal=50%
GO_POSITIVE_REGULATION_OF_MAP_KINASE_ACTIVITY	GO_POSITIVE_REGULATION_OF_MAP_KINASE_ACTIVITY		201	-0.386469	-1.71929	0.00607287	0.0574957	0.989	3272	tags=32%, list=17%, signal=38%
GO_PROTEIN_LOCALIZATION_TO_SYNAPSE	GO_PROTEIN_LOCALIZATION_TO_SYNAPSE		15	-0.650047	-1.71885	0.0159046	0.0576212	0.989	2578	tags=53%, list=14%, signal=62%
GO_POSITIVE_REGULATION_OF_EPITHELIAL_CELL_MIGRATION	GO_POSITIVE_REGULATION_OF_EPITHELIAL_CELL_MIGRATION		101	-0.43785	-1.71857	0.00813008	0.0576311	0.989	2847	tags=37%, list=15%, signal=43%
GO_VOLTAGE_GATED_POTASSIUM_CHANNEL_ACTIVITY	GO_VOLTAGE_GATED_POTASSIUM_CHANNEL_ACTIVITY		85	-0.478807	-1.7181	0.00843882	0.0577563	0.989	4184	tags=40%, list=22%, signal=51%
GO_SPROUTING_ANGIOGENESIS	GO_SPROUTING_ANGIOGENESIS		43	-0.542077	-1.71794	0.0311891	0.0577576	0.989	3051	tags=49%, list=16%, signal=58%
GO_CELL_GROWTH	GO_CELL_GROWTH		130	-0.407841	-1.71769	0.00826446	0.0577815	0.989	2697	tags=33%, list=14%, signal=38%
GO_VOLTAGE_GATED_ION_CHANNEL_ACTIVITY	GO_VOLTAGE_GATED_ION_CHANNEL_ACTIVITY		185	-0.44435	-1.71706	0.002079	0.0579301	0.989	4754	tags=43%, list=25%, signal=57%
GO_POSITIVE_REGULATION_OF_SMOOTHENED_SIGNALING_PATHWAY	GO_POSITIVE_REGULATION_OF_SMOOTHENED_SIGNALING_PATHWAY		24	-0.570564	-1.71699	0.0125	0.0578514	0.989	925	tags=29%, list=5%, signal=31%
GO_POSITIVE_REGULATION_OF_ENDOCYTOSIS	GO_POSITIVE_REGULATION_OF_ENDOCYTOSIS		114	-0.415264	-1.7156	0.00204082	0.05841	0.989	3351	tags=35%, list=18%, signal=42%
GO_NEGATIVE_REGULATION_OF_ANION_TRANSPORT	GO_NEGATIVE_REGULATION_OF_ANION_TRANSPORT		32	-0.513448	-1.71498	0.00813008	0.0586039	0.989	3769	tags=47%, list=20%, signal=59%
GO_NEGATIVE_REGULATION_OF_DEVELOPMENTAL_GROWTH	GO_NEGATIVE_REGULATION_OF_DEVELOPMENTAL_GROWTH		83	-0.424795	-1.71452	0	0.0587601	0.989	3415	tags=36%, list=18%, signal=44%
GO_POSITIVE_REGULATION_OF_ACTIN_FILAMENT_BUNDLE_ASSEMBLY	GO_POSITIVE_REGULATION_OF_ACTIN_FILAMENT_BUNDLE_ASSEMBLY		46	-0.450225	-1.71445	0.00809717	0.0586794	0.989	2346	tags=33%, list=13%, signal=37%
GO_CARGO_RECEPTOR_ACTIVITY	GO_CARGO_RECEPTOR_ACTIVITY		60	-0.46466	-1.71412	0.0143737	0.0587432	0.989	2392	tags=33%, list=13%, signal=38%
GO_GANGLIOSIDE_METABOLIC_PROCESS	GO_GANGLIOSIDE_METABOLIC_PROCESS		26	-0.532234	-1.71248	0.00847458	0.0594414	0.99	3202	tags=42%, list=17%, signal=51%
GO_ORGAN_MATURATION	GO_ORGAN_MATURATION		18	-0.564212	-1.71224	0.0184805	0.0594739	0.991	3125	tags=44%, list=17%, signal=53%
GO_REGULATION_OF_PROTEIN_MATURATION	GO_REGULATION_OF_PROTEIN_MATURATION		78	-0.428655	-1.71184	0.00603622	0.0595541	0.991	2495	tags=28%, list=13%, signal=32%
GO_REGULATION_OF_KIDNEY_DEVELOPMENT	GO_REGULATION_OF_KIDNEY_DEVELOPMENT		55	-0.463426	-1.71144	0.00200803	0.0596148	0.991	2330	tags=29%, list=12%, signal=33%
GO_GLIOGENESIS	GO_GLIOGENESIS		168	-0.413719	-1.71072	0.00838574	0.0598711	0.991	2913	tags=32%, list=16%, signal=37%
GO_RESPONSE_TO_AXON_INJURY	GO_RESPONSE_TO_AXON_INJURY		46	-0.474986	-1.70965	0.00798403	0.0603336	0.992	2032	tags=37%, list=11%, signal=41%
GO_CELL_SURFACE_RECEPTOR_SIGNALING_PATHWAY_INVOLVED_IN_CELL_CELL_SIGNALING	GO_CELL_SURFACE_RECEPTOR_SIGNALING_PATHWAY_INVOLVED_IN_CELL_CELL_SIGNALING		70	-0.451375	-1.70952	0.00609756	0.0602777	0.992	3077	tags=29%, list=16%, signal=34%
GO_INTRACELLULAR_LIGAND_GATED_ION_CHANNEL_ACTIVITY	GO_INTRACELLULAR_LIGAND_GATED_ION_CHANNEL_ACTIVITY		27	-0.541753	-1.70908	0.012987	0.0603974	0.992	2629	tags=26%, list=14%, signal=30%
GO_BASAL_LAMINA	GO_BASAL_LAMINA		21	-0.598874	-1.70839	0.0250522	0.0606504	0.992	2291	tags=48%, list=12%, signal=54%
GO_EXPLORATION_BEHAVIOR	GO_EXPLORATION_BEHAVIOR		23	-0.581784	-1.70833	0.0100806	0.0605608	0.992	3044	tags=48%, list=16%, signal=57%
GO_SUBSTRATE_DEPENDENT_CELL_MIGRATION	GO_SUBSTRATE_DEPENDENT_CELL_MIGRATION		26	-0.550222	-1.70768	0.0121457	0.0607762	0.992	3104	tags=46%, list=17%, signal=55%
GO_DIVALENT_INORGANIC_CATION_TRANSPORT	GO_DIVALENT_INORGANIC_CATION_TRANSPORT		254	-0.371686	-1.70747	0	0.0607581	0.992	3375	tags=30%, list=18%, signal=36%
GO_PASSIVE_TRANSMEMBRANE_TRANSPORTER_ACTIVITY	GO_PASSIVE_TRANSMEMBRANE_TRANSPORTER_ACTIVITY		448	-0.388858	-1.70693	0.00204082	0.0609656	0.992	4604	tags=35%, list=25%, signal=46%
GO_REGULATION_OF_INSULIN_LIKE_GROWTH_FACTOR_RECEPTOR_SIGNALING_PATHWAY	GO_REGULATION_OF_INSULIN_LIKE_GROWTH_FACTOR_RECEPTOR_SIGNALING_PATHWAY		22	-0.538339	-1.70639	0.00411523	0.0611009	0.992	2247	tags=27%, list=12%, signal=31%
GO_RETINA_DEVELOPMENT_IN_CAMERA_TYPE_EYE	GO_RETINA_DEVELOPMENT_IN_CAMERA_TYPE_EYE		126	-0.417678	-1.70566	0.0042735	0.0613309	0.992	2337	tags=24%, list=12%, signal=27%
GO_SCAVENGER_RECEPTOR_ACTIVITY	GO_SCAVENGER_RECEPTOR_ACTIVITY		39	-0.503635	-1.70548	0.014433	0.0613108	0.992	2756	tags=36%, list=15%, signal=42%
GO_REGULATION_OF_ENDOCRINE_PROCESS	GO_REGULATION_OF_ENDOCRINE_PROCESS		47	-0.479681	-1.70532	0.00391389	0.0612736	0.992	3770	tags=40%, list=20%, signal=51%
GO_NEGATIVE_REGULATION_OF_NEURON_DIFFERENTIATION	GO_NEGATIVE_REGULATION_OF_NEURON_DIFFERENTIATION		185	-0.395118	-1.705	0.004158	0.0613372	0.992	3272	tags=33%, list=17%, signal=40%
GO_CILIARY_MEMBRANE	GO_CILIARY_MEMBRANE		73	-0.446893	-1.70497	0.00413223	0.0612432	0.992	3524	tags=32%, list=19%, signal=39%
GO_REGULATION_OF_AXONOGENESIS	GO_REGULATION_OF_AXONOGENESIS		165	-0.414772	-1.70382	0.00215054	0.0617512	0.992	3569	tags=38%, list=19%, signal=47%
GO_TISSUE_REMODELING	GO_TISSUE_REMODELING		87	-0.437074	-1.7033	0.0123967	0.0619209	0.992	3770	tags=39%, list=20%, signal=49%
GO_POSITIVE_REGULATION_OF_PROTEIN_KINASE_B_SIGNALING	GO_POSITIVE_REGULATION_OF_PROTEIN_KINASE_B_SIGNALING		78	-0.425373	-1.70306	0.00627615	0.061922	0.992	3007	tags=36%, list=16%, signal=43%
GO_POSITIVE_REGULATION_OF_CELL_PROJECTION_ORGANIZATION	GO_POSITIVE_REGULATION_OF_CELL_PROJECTION_ORGANIZATION		288	-0.384937	-1.70264	0.00220264	0.0620216	0.992	3299	tags=33%, list=18%, signal=40%
GO_POSITIVE_REGULATION_OF_RECEPTOR_INTERNALIZATION	GO_POSITIVE_REGULATION_OF_RECEPTOR_INTERNALIZATION		24	-0.505444	-1.70207	0.0078125	0.062177	0.992	414	tags=21%, list=2%, signal=21%
GO_MUSCLE_HYPERTROPHY	GO_MUSCLE_HYPERTROPHY		28	-0.53354	-1.70202	0.0252632	0.0621002	0.992	3770	tags=57%, list=20%, signal=71%
GO_SODIUM_CHANNEL_COMPLEX	GO_SODIUM_CHANNEL_COMPLEX		17	-0.641861	-1.70188	0.0179283	0.0620594	0.992	2225	tags=35%, list=12%, signal=40%
GO_NEGATIVE_REGULATION_OF_ENDOTHELIAL_CELL_PROLIFERATION	GO_NEGATIVE_REGULATION_OF_ENDOTHELIAL_CELL_PROLIFERATION		30	-0.528152	-1.70075	0.0211416	0.0625102	0.992	3221	tags=47%, list=17%, signal=56%
GO_CHEMOKINE_BINDING	GO_CHEMOKINE_BINDING		17	-0.664014	-1.69892	0.0263692	0.0634112	0.993	3260	tags=65%, list=17%, signal=78%
GO_POTASSIUM_ION_TRANSPORT	GO_POTASSIUM_ION_TRANSPORT		149	-0.433957	-1.69879	0.00210084	0.0633652	0.993	4350	tags=39%, list=23%, signal=50%
GO_NEGATIVE_REGULATION_OF_ADHERENS_JUNCTION_ORGANIZATION	GO_NEGATIVE_REGULATION_OF_ADHERENS_JUNCTION_ORGANIZATION		15	-0.637501	-1.69872	0.026694	0.0632829	0.993	3023	tags=60%, list=16%, signal=72%
GO_REGULATION_OF_RESPONSE_TO_WOUNDING	GO_REGULATION_OF_RESPONSE_TO_WOUNDING		398	-0.384832	-1.69847	0.00970874	0.0632851	0.993	3770	tags=33%, list=20%, signal=40%
GO_POSTSYNAPTIC_MEMBRANE_ORGANIZATION	GO_POSTSYNAPTIC_MEMBRANE_ORGANIZATION		25	-0.562238	-1.69675	0.0203666	0.0640753	0.993	1882	tags=44%, list=10%, signal=49%
GO_CEREBRAL_CORTEX_CELL_MIGRATION	GO_CEREBRAL_CORTEX_CELL_MIGRATION		41	-0.480012	-1.69644	0.0197802	0.0641405	0.993	3004	tags=41%, list=16%, signal=49%
GO_SYNAPTIC_SIGNALING	GO_SYNAPTIC_SIGNALING		409	-0.401543	-1.69628	0.00617284	0.0640981	0.993	4712	tags=39%, list=25%, signal=51%
GO_INTERCALATED_DISC	GO_INTERCALATED_DISC		51	-0.479488	-1.69618	0.0239044	0.0640304	0.993	2470	tags=37%, list=13%, signal=43%
GO_ACTIN_MYOSIN_FILAMENT_SLIDING	GO_ACTIN_MYOSIN_FILAMENT_SLIDING		38	-0.520742	-1.69601	0.0195312	0.0640122	0.993	2563	tags=32%, list=14%, signal=37%
GO_AXON_REGENERATION	GO_AXON_REGENERATION		22	-0.565888	-1.69596	0.0162933	0.0639224	0.993	3871	tags=59%, list=21%, signal=74%
GO_REGULATION_OF_GRANULOCYTE_CHEMOTAXIS	GO_REGULATION_OF_GRANULOCYTE_CHEMOTAXIS		37	-0.536381	-1.69573	0.0235294	0.063943	0.993	3403	tags=43%, list=18%, signal=53%
GO_POSITIVE_REGULATION_OF_FAT_CELL_DIFFERENTIATION	GO_POSITIVE_REGULATION_OF_FAT_CELL_DIFFERENTIATION		44	-0.475107	-1.69492	0.0220884	0.0642527	0.993	1403	tags=25%, list=7%, signal=27%
GO_REGULATION_OF_STEROID_HORMONE_SECRETION	GO_REGULATION_OF_STEROID_HORMONE_SECRETION		20	-0.57434	-1.69405	0.0139442	0.0646245	0.993	3770	tags=45%, list=20%, signal=56%
GO_ACTIVATION_OF_MAPKK_ACTIVITY	GO_ACTIVATION_OF_MAPKK_ACTIVITY		48	-0.45396	-1.69404	0.0103093	0.0645129	0.993	2677	tags=29%, list=14%, signal=34%
GO_POSITIVE_REGULATION_OF_CELLULAR_RESPONSE_TO_TRANSFORMING_GROWTH_FACTOR_BETA_STIMULUS	GO_POSITIVE_REGULATION_OF_CELLULAR_RESPONSE_TO_TRANSFORMING_GROWTH_FACTOR_BETA_STIMULUS		24	-0.511338	-1.69388	0.0268041	0.0644742	0.993	1278	tags=29%, list=7%, signal=31%
GO_SYMPATHETIC_NERVOUS_SYSTEM_DEVELOPMENT	GO_SYMPATHETIC_NERVOUS_SYSTEM_DEVELOPMENT		21	-0.599783	-1.69311	0.024948	0.0647855	0.993	4180	tags=57%, list=22%, signal=74%
GO_MYOFILAMENT	GO_MYOFILAMENT		23	-0.552058	-1.69307	0.0349076	0.0646929	0.993	2445	tags=39%, list=13%, signal=45%
GO_MULTICELLULAR_ORGANISMAL_RESPONSE_TO_STRESS	GO_MULTICELLULAR_ORGANISMAL_RESPONSE_TO_STRESS		67	-0.446929	-1.69299	0.00411523	0.0646261	0.993	2346	tags=27%, list=13%, signal=31%
GO_NEGATIVE_REGULATION_OF_RESPONSE_TO_EXTERNAL_STIMULUS	GO_NEGATIVE_REGULATION_OF_RESPONSE_TO_EXTERNAL_STIMULUS		257	-0.386051	-1.69297	0.00200803	0.0645234	0.993	3272	tags=29%, list=17%, signal=35%
GO_SECRETION_BY_CELL	GO_SECRETION_BY_CELL		467	-0.354933	-1.69222	0	0.0647726	0.993	3077	tags=27%, list=16%, signal=31%
GO_CELL_COMMUNICATION_INVOLVED_IN_CARDIAC_CONDUCTION	GO_CELL_COMMUNICATION_INVOLVED_IN_CARDIAC_CONDUCTION		36	-0.527515	-1.69147	0.0286299	0.0650857	0.993	2600	tags=42%, list=14%, signal=48%
GO_MYELIN_ASSEMBLY	GO_MYELIN_ASSEMBLY		15	-0.623254	-1.69084	0.0167015	0.065284	0.993	1248	tags=33%, list=7%, signal=36%
GO_REGULATION_OF_CAMP_MEDIATED_SIGNALING	GO_REGULATION_OF_CAMP_MEDIATED_SIGNALING		23	-0.539537	-1.69045	0.0142276	0.0653827	0.994	4303	tags=43%, list=23%, signal=56%
GO_CELLULAR_RESPONSE_TO_NUTRIENT	GO_CELLULAR_RESPONSE_TO_NUTRIENT		38	-0.470289	-1.68924	0.0145833	0.0658852	0.994	2957	tags=37%, list=16%, signal=44%
GO_POSITIVE_REGULATION_OF_RESPONSE_TO_WOUNDING	GO_POSITIVE_REGULATION_OF_RESPONSE_TO_WOUNDING		159	-0.428839	-1.68875	0.012	0.0660276	0.995	4316	tags=39%, list=23%, signal=50%
GO_RESPIRATORY_GASEOUS_EXCHANGE	GO_RESPIRATORY_GASEOUS_EXCHANGE		47	-0.439255	-1.68867	0.00207469	0.0659588	0.995	2595	tags=26%, list=14%, signal=30%
GO_NEGATIVE_REGULATION_OF_CELL_DEVELOPMENT	GO_NEGATIVE_REGULATION_OF_CELL_DEVELOPMENT		290	-0.372976	-1.68824	0.00421053	0.0660535	0.995	3272	tags=31%, list=17%, signal=37%
GO_MACROPHAGE_ACTIVATION	GO_MACROPHAGE_ACTIVATION		31	-0.541787	-1.6879	0.0171756	0.0661372	0.995	4017	tags=58%, list=21%, signal=74%
GO_DENDRITE	GO_DENDRITE		436	-0.36278	-1.68768	0.0104603	0.0661452	0.995	3139	tags=30%, list=17%, signal=35%
GO_PHOSPHORIC_DIESTER_HYDROLASE_ACTIVITY	GO_PHOSPHORIC_DIESTER_HYDROLASE_ACTIVITY		90	-0.398629	-1.68748	0.00635593	0.0661481	0.995	3529	tags=34%, list=19%, signal=42%
GO_REGULATION_OF_MACROPHAGE_CHEMOTAXIS	GO_REGULATION_OF_MACROPHAGE_CHEMOTAXIS		16	-0.646664	-1.68736	0.0141414	0.0660878	0.995	4896	tags=69%, list=26%, signal=93%
GO_ACTIVIN_RECEPTOR_SIGNALING_PATHWAY	GO_ACTIVIN_RECEPTOR_SIGNALING_PATHWAY		20	-0.571062	-1.68705	0.0191083	0.066155	0.995	2103	tags=35%, list=11%, signal=39%
GO_NEGATIVE_REGULATION_OF_EMBRYONIC_DEVELOPMENT	GO_NEGATIVE_REGULATION_OF_EMBRYONIC_DEVELOPMENT		26	-0.558071	-1.68644	0.0241935	0.0663403	0.995	3452	tags=58%, list=18%, signal=71%
GO_SMOOTH_MUSCLE_CELL_DIFFERENTIATION	GO_SMOOTH_MUSCLE_CELL_DIFFERENTIATION		30	-0.537085	-1.68478	0.0294695	0.0671103	0.995	2722	tags=40%, list=15%, signal=47%
GO_POSITIVE_REGULATION_OF_PHOSPHOLIPID_METABOLIC_PROCESS	GO_POSITIVE_REGULATION_OF_PHOSPHOLIPID_METABOLIC_PROCESS		40	-0.467919	-1.68431	0.0107296	0.0671786	0.995	2677	tags=43%, list=14%, signal=49%
GO_GLOMERULAR_EPITHELIUM_DEVELOPMENT	GO_GLOMERULAR_EPITHELIUM_DEVELOPMENT		19	-0.565997	-1.6832	0.014553	0.0676514	0.995	2330	tags=32%, list=12%, signal=36%
GO_KIDNEY_MESENCHYME_DEVELOPMENT	GO_KIDNEY_MESENCHYME_DEVELOPMENT		17	-0.599652	-1.68305	0.0209924	0.0676133	0.995	2330	tags=35%, list=12%, signal=40%
GO_NEPHRIC_DUCT_DEVELOPMENT	GO_NEPHRIC_DUCT_DEVELOPMENT		15	-0.612202	-1.68283	0.0203666	0.0676243	0.995	2823	tags=47%, list=15%, signal=55%
GO_NEGATIVE_REGULATION_OF_SMOOTH_MUSCLE_CELL_MIGRATION	GO_NEGATIVE_REGULATION_OF_SMOOTH_MUSCLE_CELL_MIGRATION		16	-0.603598	-1.68259	0.0204499	0.0676593	0.995	2247	tags=50%, list=12%, signal=57%
GO_CARDIAC_VENTRICLE_MORPHOGENESIS	GO_CARDIAC_VENTRICLE_MORPHOGENESIS		60	-0.439551	-1.68166	0.0121704	0.0680404	0.995	1144	tags=20%, list=6%, signal=21%
GO_REGULATION_OF_MITOCHONDRIAL_DEPOLARIZATION	GO_REGULATION_OF_MITOCHONDRIAL_DEPOLARIZATION		17	-0.566053	-1.68011	0.0239044	0.0687302	0.995	2297	tags=47%, list=12%, signal=54%
GO_REGULATION_OF_BLOOD_VESSEL_ENDOTHELIAL_CELL_MIGRATION	GO_REGULATION_OF_BLOOD_VESSEL_ENDOTHELIAL_CELL_MIGRATION		49	-0.487699	-1.67999	0.0123711	0.0686873	0.995	2124	tags=31%, list=11%, signal=34%
GO_OVULATION_CYCLE	GO_OVULATION_CYCLE		110	-0.385289	-1.67996	0.00598802	0.0685858	0.995	3272	tags=31%, list=17%, signal=37%
GO_POSITIVE_REGULATION_OF_ENDOTHELIAL_CELL_PROLIFERATION	GO_POSITIVE_REGULATION_OF_ENDOTHELIAL_CELL_PROLIFERATION		66	-0.473434	-1.67935	0.0223577	0.0687982	0.995	3272	tags=42%, list=17%, signal=51%
GO_CELLULAR_RESPONSE_TO_ACID_CHEMICAL	GO_CELLULAR_RESPONSE_TO_ACID_CHEMICAL		166	-0.379923	-1.67912	0.00821355	0.0688051	0.995	3297	tags=31%, list=18%, signal=37%
GO_REGULATION_OF_FAT_CELL_DIFFERENTIATION	GO_REGULATION_OF_FAT_CELL_DIFFERENTIATION		98	-0.415311	-1.67905	0.0140281	0.0687165	0.995	3007	tags=30%, list=16%, signal=35%
GO_CARDIAC_CHAMBER_DEVELOPMENT	GO_CARDIAC_CHAMBER_DEVELOPMENT		140	-0.408361	-1.679	0.00833333	0.0686343	0.995	4102	tags=36%, list=22%, signal=45%
GO_NEURON_PROJECTION_EXTENSION	GO_NEURON_PROJECTION_EXTENSION		52	-0.477026	-1.67899	0.0250522	0.0685197	0.995	2697	tags=38%, list=14%, signal=45%
GO_BASAL_PART_OF_CELL	GO_BASAL_PART_OF_CELL		49	-0.470186	-1.6773	0.0164948	0.0693068	0.997	2690	tags=33%, list=14%, signal=38%
GO_NEGATIVE_REGULATION_OF_PLATELET_ACTIVATION	GO_NEGATIVE_REGULATION_OF_PLATELET_ACTIVATION		17	-0.632888	-1.67723	0.0149254	0.0692162	0.997	5270	tags=76%, list=28%, signal=106%
GO_REGULATION_OF_POSITIVE_CHEMOTAXIS	GO_REGULATION_OF_POSITIVE_CHEMOTAXIS		22	-0.56611	-1.67696	0.015534	0.0692333	0.997	2837	tags=41%, list=15%, signal=48%
GO_MORPHOGENESIS_OF_A_BRANCHING_STRUCTURE	GO_MORPHOGENESIS_OF_A_BRANCHING_STRUCTURE		165	-0.417917	-1.6754	0.01417	0.0700322	0.997	2610	tags=29%, list=14%, signal=34%
GO_SMOOTH_MUSCLE_TISSUE_DEVELOPMENT	GO_SMOOTH_MUSCLE_TISSUE_DEVELOPMENT		18	-0.596595	-1.67494	0.028	0.0701107	0.997	2143	tags=39%, list=11%, signal=44%
GO_STRUCTURAL_CONSTITUENT_OF_MUSCLE	GO_STRUCTURAL_CONSTITUENT_OF_MUSCLE		41	-0.550864	-1.67468	0.0282828	0.0701014	0.997	2445	tags=37%, list=13%, signal=42%
GO_RELAXATION_OF_MUSCLE	GO_RELAXATION_OF_MUSCLE		20	-0.563108	-1.67464	0.0245399	0.0700102	0.997	1492	tags=40%, list=8%, signal=43%
GO_FOREBRAIN_GENERATION_OF_NEURONS	GO_FOREBRAIN_GENERATION_OF_NEURONS		66	-0.45326	-1.67387	0.00616016	0.070317	0.997	2697	tags=27%, list=14%, signal=32%
GO_REGULATION_OF_URINE_VOLUME	GO_REGULATION_OF_URINE_VOLUME		20	-0.595077	-1.67355	0.0148305	0.0703891	0.997	3728	tags=50%, list=20%, signal=62%
GO_CARDIAC_MUSCLE_TISSUE_DEVELOPMENT	GO_CARDIAC_MUSCLE_TISSUE_DEVELOPMENT		136	-0.398984	-1.67352	0.0102249	0.0702961	0.997	3385	tags=31%, list=18%, signal=37%
GO_GLIAL_CELL_DEVELOPMENT	GO_GLIAL_CELL_DEVELOPMENT		73	-0.427342	-1.67281	0.0103306	0.0705445	0.997	2301	tags=29%, list=12%, signal=33%
GO_REGULATION_OF_STAT_CASCADE	GO_REGULATION_OF_STAT_CASCADE		129	-0.397365	-1.6728	0.00407332	0.0704329	0.997	3770	tags=34%, list=20%, signal=42%
GO_ENDOCARDIAL_CUSHION_MORPHOGENESIS	GO_ENDOCARDIAL_CUSHION_MORPHOGENESIS		22	-0.580418	-1.67262	0.0215686	0.0703911	0.997	2686	tags=45%, list=14%, signal=53%
[truncated: 2,017 more rows]

## Sheet: Low expression of ARMCX2
NAME	GS<br> follow link to MSigDB	GS DETAILS	SIZE	ES	NES	NOM p-val	FDR q-val	FWER p-val	RANK AT MAX	LEADING EDGE
[truncated: 1,876 more rows]

[truncated: 1 more sheets: High expression of ARMCX2]
